# Supplementary material for: A quantitative microbiome atlas reveals hidden diversity, eukaryotic keystones, and evolutionary trade-offs in plant rhizospheres
Source: Research Square preprint supplement (doi:10.21203/rs.3.rs-7503976/v1), 2025-09-12
Supplement: Supplementary file 1 [file 05a08fc82b4e127fc9b03c69.xlsx]

## Sheet: Table S3
Supplementary Information Table 3: Per-sample assembly statistics and metagenomic feature metrics for rhizosphere microbiomes. This table provides sample-specific sequencing and assembly quality control parameters for 738 rhizosphere metagenomes. Metrics shown in columns: SampleID: Unique identifier; Clean data (Gb): Post-QC sequence yield; Reads used (%): Proportion of reads incorporated into as…
SampleID	Clean data(Gb)	Reads used(%)	Assemble softwore	Largest contig	Total length	GC (%)	N50	N75	L50	L75	ORFs number	MAG	MQ&HQ-MAG
RS-A001	34	0.1909	megahit	394309	856995772	62.26	1124	696	170426	419370	1363328	216	41
RS-A003	46	0.1448	megahit	120905	934653188	61.9	870	634	312926	631796	1638201	108	5
RS-A004	36	0.1393	spades	148861	335796459	62.76	713	581	158238	289710	4075272	36	3
RS-A005	35	0.1117	megahit	123548	579883968	61.34	923	641	154740	347191	989290	113	16
RS-A006	32	0.1947	megahit	132687	556475380	58.56	950	655	159908	339483	6005494	406	43
RS-A007	29	0.1479	megahit	366165	598142630	63.49	985	670	155074	342421	1016821	113	17
RS-A008	32	0.1782	megahit	161039	673396180	62.57	993	664	162640	374478	1132903	169	24
RS-A011	28	0.2003	spades	327440	350819670	56.06	819	608	108892	235347	3139585	86	7
RS-A012	40	0.1572	megahit	385979	1029499713	60.87	911	645	307995	648919	1753482	154	18
RS-A016	32	0.2014	spades	67359	596715059	62.06	758	598	253900	477526	5403846	66	5
RS-A017	41	0.1434	megahit	281539	851434908	61.72	993	662	197198	465789	1401840	165	35
RS-A020	31	0.1326	megahit	68464	639692945	60.86	907	643	198825	411412	449673	88	9
RS-A021	42	0.4499	megahit	386988	681944949	62.63	1335	741	101891	279917	1788293	205	39
RS-A022	43	0.2361	megahit	246828	970648975	62.34	962	663	260263	569494	1633796	165	18
RS-A023	37	0.2893	megahit	246716	678785134	62.61	972	662	175245	390707	1147617	154	15
RS-A024	36	0.2321	megahit	246828	720330504	61.31	1007	671	174704	398368	1192150	170	16
RS-A025	35	0.2629	megahit	246821	1216887562	62.47	1071	692	279339	640065	3599706	346	42
RS-A026	34	0.1029	megahit	222462	489025818	61.76	966	658	117723	274259	817600	148	24
RS-A027	40	0.3665	megahit	274216	1249414618	61.54	1057	691	289968	662410	2025881	411	63
RS-A029	37	0.1562	megahit	322418	528893510	59.09	1119	696	98928	252897	840778	172	11
RS-A030	43	0.1787	megahit	222548	812908172	62.91	947	655	219675	482540	1384120	268	40
RS-A031	44	0.2639	megahit	319203	957377692	62.41	1086	693	205358	487886	1574112	202	15
RS-A032	36	0.1106	megahit	246828	514799808	61.89	958	652	128212	294626	877161	135	14
RS-A033	31	0.1898	spades	219139	499832815	60.87	811	612	176496	356125	4230725	86	11
RS-A034	47	0.2061	megahit	390722	762800771	60.53	1002	664	175866	415142	1251836	185	22
RS-A035	45	0.1559	megahit	190169	1005509954	62.11	938	649	277807	606066	1701000	174	19
RS-A036	45	0.188	megahit	246828	1220715863	62.69	944	653	333861	729313	2074693	191	24
RS-A037	40	0.1724	megahit	451819	990258493	61.67	963	658	255397	572369	1651526	184	29
RS-A038	35	0.2962	megahit	591486	933536460	60.92	1228	726	158617	413422	1457980	800	128
RS-A039	42	0.1817	megahit	393912	756785547	61.7	977	655	172410	414321	1245372	170	28
RS-A040	32	0.1742	megahit	184577	834202040	62.29	913	650	257376	532087	1431283	113	12
RS-A041	44	0.1606	megahit	508404	597308122	61.39	999	654	123966	314012	977112	152	36
RS-A042	40	0.176	megahit	396329	956355485	61.33	1018	670	219900	516147	1562902	203	42
RS-A043	40	0.1902	megahit	695586	1097107184	62.48	937	653	308200	664837	1858117	162	25
RS-A045	38	0.1096	megahit	130464	694099163	62.66	865	632	229429	467254	1215525	90	5
RS-A046	40	0.1251	megahit	204272	874357276	62.24	934	653	256948	541516	1488150	119	13
RS-A047	36	0.1083	megahit	123698	650788918	60.75	860	629	211850	436322	1120910	100	6
RS-A048	40	0.1567	spades	63249	477034395	60.37	799	608	179856	353141	4525804	79	7
RS-A049	36	0.1114	megahit	67795	548969935	60.38	848	626	190787	381507	965493	68	0
RS-A050	36	0.1295	megahit	90294	697847767	60.43	894	641	220296	454039	1195393	102	15
RS-A052	48	0.1923	spades	98345	795992358	61.13	811	611	284968	571281	7180418	111	11
RS-A054	39	0.1092	megahit	345789	516190044	51.65	857	631	169758	347554	763385	104	21
RS-A055	33	0.1162	megahit	69514	573453139	62.55	897	643	181522	373085	997995	80	8
RS-A056	37	0.2105	megahit	166908	1033496043	60.7	970	666	284635	611431	693272	174	26
RS-A057	32	0.1761	spades	142538	473253965	63.36	736	590	206655	387738	4814630	56	9
RS-A058	44	0.1428	megahit	222689	870652362	60.34	901	642	254734	545675	1477443	107	9
RS-A059	41	0.1127	megahit	71579	732447637	61.86	879	636	233284	481860	1268269	106	12
RS-A060	47	0.14	megahit	295739	1002318890	62.46	885	640	317523	655043	3873532	259	28
RS-A061	34	0.1128	megahit	111595	591988533	62.54	844	626	202171	408398	1048809	77	9
RS-A062	31	0.1691	megahit	130160	698132110	56.38	877	638	225038	461366	1086755	104	8
RS-A063	38	0.1361	megahit	144287	822889618	62.42	886	636	249540	527749	1414595	124	5
RS-A064	29	0.1035	megahit	174768	441517139	63.23	863	629	136721	288870	768307	98	13
RS-A065	49	0.206	megahit	509449	1307122922	61.31	956	655	355723	776270	2194708	205	23
RS-A066	45	0.2478	megahit	548486	1327179212	62.2	1008	672	313646	725235	2183829	208	33
RS-A067	39	0.1661	megahit	509449	804222878	61.27	941	654	226697	487438	1357227	117	10
RS-A068	43	0.1871	megahit	234317	1051692351	57.29	943	656	284676	624528	1631527	181	29
RS-A069	37	0.1997	megahit	454775	960305284	59.79	965	658	254266	561270	1572855	157	15
RS-B001	32	0.2495	megahit	325286	751265436	61.45	1044	678	164885	393553	1234138	818	127
RS-B002	65	0.2095	megahit	478097	546243784	59.8	1004	670	121915	292071	890724	154	34
RS-B003	32	0.3893	megahit	478198	377330515	60.8	941	651	94486	217418	616580	95	17
RS-B004	36	0.1344	megahit	131818	873276410	63.28	936	651	247808	532344	1485850	158	23
RS-B005	41	0.1111	megahit	386624	545206643	64.16	834	621	177832	369764	975613	92	15
RS-B006	36	0.1145	megahit	360331	514598596	63.75	890	636	139814	313838	876007	107	25
RS-B010	37	0.1404	megahit	387217	406850142	59.82	1418	718	46215	153436	610051	174	43
RS-B014	34	0.1158	megahit	550138	673642467	62.52	854	628	225959	459093	1183580	459	57
RS-B015	32	0.1155	megahit	80705	678331617	59.42	874	634	216703	447703	1121378	100	11
RS-B017	29	0.276	megahit	506648	787066185	50.27	1268	737	140606	350382	1032371	154	25
RS-B018	27	0.5767	megahit	501319	441044441	56.89	1454	742	46199	158778	614231	203	37
RS-B019	32	0.1363	megahit	410891	496014151	59.83	1106	692	92997	238711	775797	141	36
RS-B020	41	0.2111	megahit	227902	1137365861	62.62	931	654	330551	700578	1936863	168	18
RS-B021	29	0.3071	megahit	270707	1021654150	60.73	1077	696	239009	540087	1648959	175	21
RS-B022	40	0.334	megahit	770196	1168439393	61.05	1141	707	234858	568383	1839312	211	35
RS-B023	33	0.2166	megahit	150167	994492452	57.03	1018	679	260350	564893	1553922	135	19
RS-B024	37	0.221	megahit	554900	880906550	59.81	1037	671	183259	454084	1368217	867	140
RS-B025	40	0.1039	megahit	99297	692620535	63.09	880	634	211132	446456	1217345	132	21
RS-B028	54	0.1383	megahit	218375	1059647871	64.56	891	632	308417	667712	1812716	160	28
RS-B029	32	0.1079	megahit	63410	515824006	60.26	913	645	158226	328883	872841	81	6
RS-B031	29	0.1064	megahit	159970	385330071	55.74	815	619	143190	280273	642555	316	29
RS-B032	92	0.133	megahit	318144	980508695	62.43	880	634	298834	631993	1688635	928	86
RS-B032R	40	0.1279	megahit	345041	725308932	63.52	905	643	214844	456346	1248921	143	17
RS-B033	48	0.1449	megahit	148861	919777780	62.17	914	645	271907	576369	1561018	130	12
RS-B034	35	0.163	megahit	361051	754021826	62.75	935	651	197423	443423	1268159	142	26
RS-B035	42	0.1383	megahit	195934	705514991	60.99	950	650	179605	408768	1174287	137	30
RS-B036	32	0.1841	spades	424865	474989012	62.18	805	608	162767	334851	4307598	85	16
RS-B037	34	0.1822	megahit	627509	461292091	60.33	1572	753	47144	160160	675125	182	50
RS-B038	32	0.1256	megahit	279503	629198274	60.82	962	654	155802	358287	1056748	122	32
RS-B039	31	0.1333	spades	37297	287428926	62.9	741	589	121773	231655	3393457	44	3
RS-B040	35	0.1924	spades	195800	522338291	64	782	603	199930	392377	34650	68	6
RS-B041	36	0.2928	megahit	627447	1060739168	60.37	1041	685	253924	574174	1714229	181	27
RS-B043	33	0.2359	megahit	627506	596529127	62.13	1272	725	93916	254934	925688	194	41
RS-B044	45	0.1741	megahit	270726	1031531132	64.34	923	650	299307	637444	1793378	174	23
RS-B045	32	0.1742	megahit	470902	522781741	62.49	1010	667	117954	280967	865227	136	22
RS-B046	32	0.2306	megahit	476412	480360317	59.28	1475	762	60876	179168	707500	189	48
RS-B047	32	0.1633	spades	370506	430579116	59.72	935	638	101681	244484	3470552	128	20
RS-B048	37	0.1205	megahit	248698	524754449	62.11	909	642	149517	324200	898245	107	18
RS-B049	34	0.1342	megahit	402056	544213899	59.48	967	653	130030	305121	887552	144	23
RS-B050	35	0.1033	megahit	179297	299985003	57.31	782	602	109000	219685	519348	70	16
RS-B051	34	0.1579	spades	203050	411072432	59.74	833	614	133370	279498	3796875	94	10
RS-B053	41	0.1323	megahit	256253	758313931	60.82	898	641	232830	486618	10502024	586	66
RS-B055	34	0.378	megahit	341418	823369517	57.41	1399	759	113902	321982	1234308	385	71
RS-B056	34	0.2283	megahit	270707	422175587	59.57	1004	666	93556	225748	689465	104	25
RS-B057	41	0.3813	megahit	304715	879556312	59.04	1337	754	131198	357918	1323213	360	67
RS-B058	36	0.2162	megahit	367939	598802045	57.06	1119	693	115981	290912	946395	185	38
RS-B059	35	0.2734	megahit	259670	599024323	58.64	1075	689	125498	303853	949245	172	25
RS-B060	36	0.2859	megahit	227822	628379740	56.8	1265	730	98473	267740	961765	195	41
RS-B061	26	0.1268	megahit	213812	292335996	58.14	962	654	74066	168217	478031	88	7
RS-B062	38	0.1435	megahit	458834	675630248	59.63	897	645	209045	434153	1141174	101	18
RS-B064	40	0.2726	megahit	272107	431056835	56.38	1010	673	103865	237369	692569	82	15
RS-B065	37	0.3737	megahit	452140	395883773	57.3	1134	695	71265	186212	613187	142	26
RS-B066	31	0.1335	spades	765652	249888412	59.28	781	597	84048	176874	2813937	68	12
RS-B067	34	0.1153	megahit	254859	300253908	59.3	918	647	81317	180467	502197	79	15
RS-B068	35	0.3878	megahit	769256	1105260445	61.21	1717	815	106109	352415	1604298	338	101
RS-B069	38	0.4413	megahit	541925	1499744290	61.61	1705	822	148921	481593	2174440	407	124
RS-B070	34	0.2117	megahit	226854	812715705	60.82	979	670	222247	477222	1349555	121	11
RS-B071	34	0.5026	megahit	410199	234883509	59.17	1153	697	42426	110042	367647	80	13
RS-B072	36	0.4841	megahit	279392	680735527	61.26	1784	822	70072	218660	989283	710	58
RS-B073	45	0.4873	megahit	481484	545956461	60.95	1132	705	106887	263541	871677	150	23
RS-B074	37	0.5386	megahit	271271	301281223	58.6	1142	699	57344	144273	473516	103	14
RS-B075	34	0.4737	megahit	409936	293496427	59.36	1015	674	67858	158514	473636	42	9
RS-B076	32	0.33	megahit	246909	489434965	59.93	983	671	130683	284005	805634	95	7
RS-B077	37	0.5293	megahit	409935	342429210	57.68	1069	688	72523	174856	549803	111	9
RS-B080	42	0.2587	megahit	409937	391767833	59.33	965	656	97191	222948	644446	113	25
RS-B081	47	0.3243	megahit	409937	373246060	58.08	949	652	94187	215252	610155	105	15
RS-B082	36	0.3105	megahit	229472	484730318	59.46	1104	692	91896	234475	766757	140	29
RS-B083	33	0.2967	megahit	246909	577382609	60.96	991	669	149596	330184	947300	134	8
RS-B084	38	0.3933	megahit	954259	637777173	60.3	1009	674	156519	353936	1042146	122	14
RS-B085	33	0.5044	megahit	270706	498212880	60.71	1049	689	115730	265234	811860	89	9
RS-B086	46	0.1769	megahit	549485	1023451730	62.66	963	658	269162	596769	1734015	181	27
RS-B087	38	0.183	megahit	215886	659734631	62.6	961	651	162263	375489	1115005	144	22
RS-B088	45	0.1447	megahit	641447	968022956	61.64	916	647	287125	606450	1655020	133	16
RS-B089	37	0.188	spades	548520	569849022	62.83	831	615	181558	383943	4917498	119	27
RS-B091	51	0.2437	megahit	276428	1606587019	58.94	1034	683	387633	875043	2496692	271	47
RS-B092	38	0.1795	megahit	539905	851375936	60.4	968	661	226437	497673	1405520	123	19
RS-B093	49	0.1662	megahit	293827	1170071831	60.33	953	657	323273	699324	1941243	175	28
RS-B094	50	0.2118	megahit	435130	1363535406	62.02	1024	675	319883	738653	2237020	233	32
RS-B096	33	0.1886	spades	99385	355488657	60.31	757	593	142939	276989	3733215	52	11
RS-B097	36	0.1745	spades	589306	372076856	62.14	805	603	113704	249439	4026575	87	18
RS-B098	39	0.0833	megahit	251081	567201588	64.15	805	613	204091	408260	1031640	84	21
RS-B099	33	0.1535	megahit	191689	653329321	60.37	916	652	204274	418490	1100182	94	4
RS-B100	33	0.1145	megahit	212679	424293884	59.94	916	645	121150	261477	710377	156	17
RS-B101	37	0.13	megahit	286584	429147372	59.49	1008	658	91178	226549	701059	128	27
RS-B102	30	0.1518	megahit	153331	543832337	60.17	944	655	155039	330979	909087	115	15
RS-B104	29	0.1721	megahit	213320	421650156	58.04	1028	679	96870	225821	675273	207	31
RS-B105	38	0.1753	megahit	211764	766072731	59.76	986	665	202650	443750	1257767	177	16
RS-B106	48	0.1776	megahit	272423	643469782	60.21	999	656	136034	340035	1037730	255	57
RS-B107	38	0.3304	megahit	318498	620812171	60.63	929	652	180814	383412	1050591	107	14
RS-B110	41	0.2463	megahit	212955	1166081038	61.02	967	665	321226	690742	1929086	164	20
RS-B111	37	0.1886	megahit	332327	736581796	60.75	978	664	183093	416002	1199080	154	38
RS-B112	32	0.133	megahit	329465	391174923	58.19	853	623	118460	254809	645712	88	21
RS-B113	33	0.1524	megahit	191689	436716970	56.87	838	621	144381	297863	711270	112	16
RS-B114	41	0.1682	megahit	354533	738494064	60.52	979	664	194284	427619	1226600	393	47
RS-B116	31	0.177	spades	253249	334207385	55.51	732	588	147707	276109	2769239	44	6
RS-B117	34	0.1185	megahit	212955	374633389	59.64	959	652	95803	216737	615152	156	27
RS-B118	39	0.1235	megahit	268009	522018835	60.77	870	630	158975	338053	883063	105	14
RS-B119	39	0.1251	megahit	191689	471975655	61.5	863	626	140250	303414	803547	103	21
RS-B120	44	0.1122	megahit	385528	704813291	59.99	888	637	217999	455795	1204824	124	14
RS-B121	47	0.1514	megahit	386988	799377943	62.55	965	661	201182	456122	1332463	157	30
RS-B122	39	0.2433	megahit	388461	605955333	60.16	994	661	132089	323505	981870	162	32
RS-B123	35	0.3488	megahit	262382	510082770	59.97	958	657	135938	299721	853169	135	22
RS-B124	38	0.5196	megahit	409937	439218237	59.29	1319	748	65070	179413	659828	148	22
RS-B125	33	0.1532	megahit	385372	419800453	58.78	965	655	101405	236468	691309	128	25
RS-B127	41	0.3848	megahit	234080	403876166	62.58	985	664	95863	223440	659120	96	12
RS-B128	39	0.4307	megahit	291189	673401754	60.19	1087	691	135404	334801	1067821	243	36
RS-B129	42	0.2628	megahit	212511	1307819681	62.1	1027	681	319703	718184	2141759	209	24
RS-B130	44	0.2783	megahit	184862	1646587976	63.18	1073	694	384882	871330	2684751	265	32
RS-B130R	36	0.1686	megahit	279844	330128457	60.14	950	646	74302	182220	544720	97	21
RS-B131	40	0.2087	megahit	261304	1280663991	61.48	1017	674	304737	699745	2057826	184	26
RS-B132	29	0.1376	megahit	532481	625221668	61.85	949	655	173748	375355	1042643	124	16
RS-B135	37	0.2797	megahit	341508	926050308	60.69	987	670	236718	526419	1513735	189	29
RS-B136	30	0.1856	megahit	289886	566852485	61.57	904	643	158216	347044	950673	131	16
RS-B138	102	0.27	megahit	581723	3001353184	59.43	994	669	761211	1698522	4809402	845	111
RS-B140	39	0.2477	megahit	136320	1330139954	61.38	1037	685	327511	729576	2166540	167	11
RS-B141	32	0.2417	megahit	401052	937149887	62.3	966	664	260772	558112	1572165	114	15
RS-B142	47	0.2284	megahit	196689	1374303604	62.1	1048	689	336862	749201	2283477	162	6
RS-B143	33	0.1576	megahit	363167	670474106	62.56	978	666	178910	390401	1131077	144	18
RS-B144	44	0.1871	megahit	402056	916042848	60.74	973	658	229027	521371	1523488	184	34
RS-B145	42	0.1594	megahit	713757	639607245	62.48	897	637	174338	389497	1108596	138	33
RS-B146	38	0.2918	megahit	429687	1082641743	59.87	1048	683	242686	569575	1754396	189	28
RS-B147	38	0.2616	megahit	711508	913897543	61.12	1101	688	173377	443262	1453907	233	43
RS-C001	38	0.2715	megahit	292510	783255437	60.38	1080	686	163305	396812	1272532	199	44
RS-C002	37	0.1525	megahit	288479	656978577	63.14	900	640	193833	413873	1149590	691	48
RS-C003	32	0.114	megahit	208478	431023930	61.71	838	622	142119	293456	764261	78	7
RS-C004	35	0.233	megahit	200515	622904524	57.32	1065	685	131697	318317	1009599	146	25
RS-C005	41	0.2372	megahit	248649	539071673	58.81	989	662	125852	296213	885084	123	23
RS-C006	41	0.2354	megahit	225730	793030524	58.89	1051	685	174012	412924	1294025	185	30
RS-C007	32	0.2614	megahit	288621	465526789	56.62	1045	677	99421	241152	747691	129	39
RS-C008	36	0.1562	megahit	249054	618931116	58.68	942	652	168910	369922	1042324	142	14
RS-C010	37	0.1712	megahit	202016	538800001	60.04	962	655	136940	310142	903071	737	52
RS-C011	33	0.2504	megahit	364052	571613949	55.43	1359	746	80982	228485	864328	182	41
RS-C012	40	0.158	megahit	338061	932276687	61.63	978	663	244745	539597	1571082	170	27
RS-C013	41	0.1166	megahit	178190	754376893	62.31	875	633	240423	497541	1316738	104	10
RS-C015	29	0.1659	megahit	241335	732534597	61.27	950	661	210874	445742	1250301	131	11
RS-C016	37	0.2814	megahit	209243	1187611910	59.15	1113	693	241706	589143	1862710	270	37
RS-C017	41	0.2328	megahit	194678	1192891835	62.33	986	670	320538	693783	2026327	211	18
RS-C018	42	0.112	megahit	203177	660322167	62.56	873	633	200348	425708	1146436	122	22
RS-C019	49	0.2217	megahit	342496	1027705940	63.36	903	640	299350	643139	1789472	178	21
RS-C020	42	0.1895	megahit	400613	1157690054	61.15	1076	689	245260	589495	1869871	1066	148
RS-C021	34	0.1602	megahit	137811	730106258	62.37	941	655	208936	445309	1256219	132	16
RS-C022	39	0.2271	megahit	352683	1132401879	63.97	1102	695	235686	567505	1852911	1304	193
RS-C023	34	0.121	megahit	93042	617769142	63.5	905	643	186795	392601	1076440	133	17
RS-C024	37	0.0935	megahit	195719	524155759	63.84	829	620	182671	367712	949359	61	15
RS-C025	37	0.1169	megahit	423648	579779320	62.32	873	635	184958	382295	1020362	114	17
RS-C026	34	0.1212	megahit	271506	571506941	59.22	966	659	142185	324871	950874	163	24
RS-C027	34	0.1751	spades	328059	333486980	55.54	736	588	137610	265616	3293251	49	12
RS-C028	35	0.1185	megahit	328455	482522785	62.45	973	651	109244	264683	810621	121	28
RS-C029	33	0.1046	megahit	192083	457229284	61.11	932	643	116067	266878	781493	141	19
RS-C031	33	0.1737	spades	218324	400224614	60.33	819	612	128863	272258	3593174	94	15
RS-C032	35	0.1736	spades	285015	393729794	61.44	807	610	135757	277832	3542741	76	12
RS-C033	36	0.1326	megahit	157241	664095612	60.77	1048	674	146659	349361	1089832	149	34
RS-C034	34	0.1301	megahit	137817	570650312	61.25	968	660	153178	335164	969157	115	21
RS-C035	40	0.1449	megahit	336429	639487597	61.04	909	647	188630	400377	1098670	111	17
RS-C036	35	0.1492	megahit	224789	710962675	62.17	956	657	187606	415848	1180380	124	20
RS-C037	37	0.1412	megahit	252703	521339403	62.23	892	638	149164	324887	901287	87	19
RS-C038	37	0.148	megahit	77921	704286201	61.93	882	639	231710	469394	1234664	90	12
RS-C039	36	0.1537	spades	305418	398589580	60.02	787	605	151493	297616	3759064	78	7
RS-C040	37	0.1245	megahit	206905	628566681	61.24	909	646	193282	401509	1093842	87	11
RS-C042	33	0.1505	megahit	184065	629712667	61.26	976	665	169091	367854	1064228	109	11
RS-C043	38	0.153	megahit	285455	766567081	60.74	949	656	216627	463681	1308517	121	19
RS-C044	33	0.1188	megahit	124828	607663829	62.07	910	647	185335	386304	1050354	107	6
RS-C045	34	0.1336	megahit	103167	680119615	60.34	922	649	200097	423550	1151443	110	11
RS-C046	36	0.1301	megahit	331218	679232799	62.03	894	640	210625	438445	1186225	100	15
RS-C048	32	0.1089	megahit	140678	505405419	61.34	880	635	154611	326288	880962	105	8
RS-C049	44	0.1752	megahit	157241	1147038925	62.87	920	652	347431	723377	1989795	630	51
RS-C050	43	0.131	megahit	157238	853212738	61.24	902	642	260441	545287	1466383	136	22
RS-C051	32	0.1494	spades	50535	346840157	62.85	748	593	149901	281326	3646427	43	4
RS-C052	32	0.186	spades	38695	458969542	63.9	770	601	188189	358652	4293229	59	3
RS-C053	34	0.195	megahit	518652	622817702	61.8	1183	706	104823	280960	987781	174	44
RS-C055	36	0.1113	megahit	211478	494946615	62.42	870	632	153519	323074	876572	84	7
RS-C058	37	0.2389	megahit	328648	737204576	60	1100	695	150950	366811	1185025	200	46
RS-C059	41	0.191	spades	49757	666122735	62.28	753	595	283315	534523	6463473	69	8
RS-C060	36	0.2058	megahit	469728	701204885	57.73	1086	682	134538	344052	1107338	223	42
RS-C061	41	0.1833	spades	94558	493326581	59.27	817	610	168888	346130	4788334	111	6
RS-C062	31	0.1526	spades	279771	307477907	60.75	763	597	126071	241216	3238473	44	2
RS-C064	41	0.1013	megahit	811613	623005492	60.78	906	638	173661	382357	1051060	131	24
RS-C065	41	0.1708	megahit	211497	594177789	57.03	921	642	162156	359005	964693	147	17
RS-C068	36	0.1556	megahit	108021	692396373	60.75	914	646	207103	436088	1186972	134	25
RS-C069	30	0.1484	megahit	98629	570191931	60.61	945	658	162148	345773	967670	136	29
RS-C070	33	0.169	megahit	183483	648242568	61.56	956	661	184602	391778	1106730	125	19
RS-C071	33	0.2185	megahit	289886	844538226	61.54	977	669	236067	501648	1433942	139	19
RS-C072	34	0.2889	megahit	136408	1087386234	59.4	1054	693	270610	594769	1759156	173	15
RS-C073	35	0.193	megahit	195283	670390660	60.82	1013	674	166812	373709	1104137	132	17
RS-C074	30	0.1654	megahit	125214	565478495	60.94	933	657	174600	357759	974028	104	8
RS-C075	44	0.2043	megahit	564443	866846200	59.52	1040	678	191009	455196	1411307	227	50
RS-C077	43	0.2607	megahit	665160	999431091	60.32	1119	705	200983	489127	1602764	878	94
RS-C078	36	0.1787	megahit	157241	819146544	62.64	947	657	233728	497944	1402411	137	17
RS-C079	34	0.1006	megahit	33756	486110938	62.04	865	632	163609	330359	859542	78	3
RS-C080	40	0.1444	megahit	209183	698836119	62.23	911	645	204553	436292	1214496	135	18
RS-C081	35	0.1305	megahit	205402	506310678	61.7	872	635	165822	338369	887768	83	10
RS-C082	36	0.1787	megahit	253133	837010712	62.76	922	653	258863	532385	1455556	128	12
RS-C083	30	0.2348	megahit	919341	601018997	61.31	1337	730	80870	239742	927371	179	47
RS-C084	40	0.1861	megahit	239708	863996306	60.3	955	662	236358	512653	1443139	180	22
RS-C086	37	0.3341	megahit	686982	916752180	61.46	1128	706	184645	447523	1480096	705	92
RS-C087	39	0.2644	megahit	402457	1078817740	61.66	1003	675	279117	612598	1808841	700	67
RS-C088	36	0.2062	megahit	172221	867917045	61.2	977	670	240598	513143	1473824	613	40
RS-C089	39	0.3129	megahit	627446	960786271	60.48	1122	706	186474	463070	1531201	231	44
RS-C090	34	0.2848	megahit	327870	822928396	59.02	1247	734	142155	363682	1281352	249	37
RS-C091	35	0.2027	megahit	192099	585838201	61.92	960	664	158898	345356	993096	113	13
RS-C092	32	0.1901	megahit	139287	461681918	59.2	1171	696	76181	208803	725407	512	70
RS-C093	32	0.167	megahit	340419	490944889	62.49	924	646	128765	290774	832598	634	67
RS-C095	34	0.2528	megahit	217811	676052862	62.04	1447	753	85645	255590	1024211	193	38
RS-C100	32	0.2308	megahit	211351	476564162	61.3	1055	676	95347	240491	780619	134	9
RS-D001	42	0.3998	megahit	388509	1078887272	58.09	1584	801	130202	380207	1590435	360	71
RS-D002	47	0.2117	megahit	270707	1283582861	61.06	1004	675	340476	737311	2107082	160	17
RS-D003	67	0.3265	megahit	272026	1605247641	60.54	1079	698	375016	846792	2599079	246	29
RS-D004	39	0.2093	megahit	188304	740181245	61.06	1256	721	124062	325629	1166867	221	21
RS-D005	50	0.1416	megahit	593316	542857590	60.57	981	660	127330	299801	904568	139	27
RS-D006	44	0.3601	megahit	326035	1315995990	62.5	1362	751	182624	521354	2029741	359	71
RS-D007	48	0.2134	megahit	268931	957462463	61.53	1076	680	182989	471295	1536236	231	50
RS-E001	42	0.1059	megahit	145478	797821033	62.8	889	638	246693	515698	1391170	301	59
RS-E002	41	0.1101	megahit	73046	765218253	61.95	854	627	254987	520047	1352071	124	20
RS-E003	31	0.1791	spades	202697	472087514	61.94	834	615	154872	322318	4199986	104	17
RS-E004	30	0.1727	spades	300286	342763456	61.44	784	602	127174	253425	3387795	73	12
RS-E005	42	0.1311	megahit	253845	690036884	63	895	639	207609	439313	1200658	138	22
RS-E007	36	0.0616	megahit	42801	422651862	63.1	780	604	168862	324316	783402	76	8
RS-E008	41	0.1666	spades	279024	556992549	64.23	790	604	201660	406035	5419302	86	13
RS-E009	41	0.0771	megahit	78334	587152620	62.75	842	623	201963	407322	1047213	106	14
RS-E010	33	0.1279	spades	58374	301172453	62.46	749	591	122537	236927	3489777	54	6
RS-E011	34	0.1475	megahit	259131	673349763	62.86	918	646	189155	411507	1163760	134	17
RS-E012	32	0.2761	megahit	275042	524145658	56.57	1248	719	87609	230967	814614	180	32
RS-E014	36	0.0841	megahit	539852	433184009	63.22	862	626	131803	281712	767451	102	19
RS-E015	34	0.1864	spades	64537	526138236	63.78	801	609	194881	385684	4605081	79	9
RS-E016	41	0.0852	megahit	87496	569662229	63.09	848	624	190040	388664	1015477	90	8
RS-E017	30	0.4482	megahit	1313967	414208722	57.87	1728	823	44942	136109	598856	166	19
RS-E021	33	0.5073	megahit	388348	643180925	60.19	1309	747	105756	273527	1002762	219	12
RS-E022	29	0.475	megahit	244179	835262136	61.44	1631	818	98077	286828	1246220	246	32
RS-E023	31	0.1096	megahit	222781	371572508	59.09	944	644	90885	212771	626862	98	12
RS-E026	44	0.4245	megahit	452259	856414933	59.15	1870	823	74877	259142	1226926	308	82
RS-E027	41	0.3868	megahit	251674	1567705467	59.15	1259	748	287178	701246	2334250	367	40
RS-E028	38	0.6214	megahit	261863	944086713	58.13	1485	810	141601	363159	1403805	260	24
RS-E031	34	0.1519	megahit	168472	365885325	61.49	848	627	115527	242716	643020	79	18
RS-E032	37	0.1184	megahit	237178	524224089	61.34	899	638	152734	328799	907758	112	19
RS-E033	38	0.23	megahit	560317	841334387	60.73	969	664	227897	494528	1402086	137	11
RS-E034	37	0.2656	megahit	512325	708488996	59.78	1209	720	123506	319242	1115454	228	38
RS-E035	41	0.1698	megahit	696140	1204825137	61.49	966	661	321560	705390	2006927	191	33
RS-E037	42	0.1669	megahit	315166	930452344	62.64	934	650	260362	563986	1576179	167	28
RS-E038	46	0.1634	megahit	348955	1052910795	63.56	921	650	317813	663241	1814133	843	70
RS-E039	39	0.101	megahit	102428	643018769	63.65	826	621	231628	458741	1164057	90	9
RS-E040	34	0.1198	megahit	259812	406037068	62.41	894	630	103458	241568	693354	609	45
RS-E041	44	0.339	megahit	202000	701400704	58.58	1158	700	125280	326591	1103460	176	18
RS-E042	35	0.2085	megahit	162406	704121909	61.71	981	665	178435	400608	1169767	133	28
RS-E043	34	0.1802	spades	607318	498123275	62.21	781	602	182050	365970	4717094	91	15
RS-E044	31	0.166	megahit	87260	695785933	60.93	948	654	196102	420949	1161456	116	15
RS-E045	37	0.1019	megahit	505079	582988647	63.2	867	631	186881	386879	1023330	90	15
RS-E046	33	0.1788	megahit	761028	698621105	63.13	902	643	200055	433069	1201676	130	13
RS-E047	42	0.1298	megahit	143915	807214658	63.48	909	643	237143	505485	1403933	141	18
RS-E049	33	0.1382	megahit	570532	501277993	63.06	918	646	144577	309926	868622	253	31
RS-E050	37	0.1654	megahit	219492	700911146	61.87	928	651	199111	428101	1185220	129	29
RS-E051	35	0.2389	megahit	252797	930437413	61.97	1064	686	210588	489249	1533402	205	33
RS-E052	40	0.1422	megahit	87904	744870654	62.55	893	640	231926	481986	1286169	107	8
RS-E053	39	0.1801	megahit	350221	591524169	50.99	1360	719	98587	255706	812771	137	8
RS-E055	49	0.3009	megahit	297259	1187280857	61.04	1004	672	296710	665545	1946322	746	79
RS-E057	33	0.5359	megahit	348834	604768457	56.65	1739	822	59611	192992	874730	237	62
RS-E062	37	0.3273	megahit	239609	770588996	58.25	1163	702	145819	365459	1191518	197	31
RS-E063	37	0.4107	megahit	412413	548098998	58.16	1744	792	51891	176241	790183	192	35
RS-E065	33	0.2766	megahit	163454	507214365	59.36	1076	684	103963	255775	819244	138	20
RS-E066	42	0.3881	megahit	271589	657467726	59.83	1114	690	120142	313241	1057737	432	93
RS-E067	45	0.3467	megahit	350497	722001041	60.45	981	667	190093	417286	1193625	104	16
RS-E068	32	0.2236	megahit	232600	597242276	60.35	966	663	160949	350676	997001	117	21
RS-E069	33	0.3108	megahit	457502	314902545	57.19	990	658	67258	167142	503834	107	20
RS-E070	35	0.4283	megahit	298680	449790716	59.33	1252	716	63622	187156	688008	128	25
RS-E071	35	0.1684	spades	427507	359998582	62.4	778	600	130801	264174	3703381	72	10
RS-E072	36	0.1563	spades	229442	445428915	62.08	834	615	145866	303882	3975228	85	9
RS-E073	39	0.2536	megahit	179079	740920547	61.38	1038	677	172603	398613	1209436	137	17
RS-E074	36	0.2867	megahit	265035	526357474	58.7	1008	669	122714	286510	860311	317	22
RS-E078	33	0.1582	megahit	532627	645017135	58.54	951	653	162570	371248	1055527	129	30
RS-E079	30	0.1061	megahit	458172	387438323	59.65	920	646	110716	238567	652993	121	8
RS-E080	34	0.1084	megahit	337328	458717152	61.22	1043	669	90981	232119	748817	129	28
RS-E081	38	0.242	megahit	479331	585212703	62.51	934	646	153177	345356	1008896	144	16
RS-E082	39	0.2453	megahit	328850	697361436	60.97	1106	686	132163	338284	1132899	172	32
RS-E083	36	0.1507	megahit	260805	623471890	62.38	963	655	158180	358604	1052487	136	29
RS-E084	39	0.1277	megahit	201360	742092975	62.6	871	634	242954	495992	1291517	92	7
RS-E085	38	0.1773	megahit	352114	593128015	60.89	1023	664	129283	313972	971780	179	29
RS-E087	42	0.3274	megahit	403779	1381624192	61.06	1042	686	334274	750649	2246450	214	37
RS-E088	35	0.18	megahit	358197	686469090	61.28	934	653	191085	414575	1146394	138	27
RS-E089	41	0.1966	megahit	711471	812058520	60.34	942	654	228271	491436	1354382	144	18
RS-F089	38	0.4421	megahit	389232	745068045	58.5	1418	763	104277	290338	1129212	260	36
RS-F090	38	0.2686	megahit	418296	1017978610	58.39	1155	698	181160	473562	1533071	249	53
RS-F091	41	0.3183	megahit	367045	958737933	61.8	1212	720	176732	440961	1527884	244	25
RS-F093	30	0.1857	megahit	415692	730667758	60.65	990	671	195728	423875	1229737	167	24
RS-F094	48	0.2044	megahit	427855	1341902549	62.46	1025	676	329522	740770	2259922	244	32
RS-F095	34	0.1729	megahit	150411	886688045	62.34	1032	675	206996	478814	1466097	168	42
RS-F096	34	0.1862	megahit	312340	975717975	61.27	975	664	260669	569428	1640547	149	31
RS-F100	45	0.0966	megahit	176471	742530104	62.67	879	635	239494	491546	1301990	114	13
RS-F101	41	0.1939	megahit	276760	875320642	56.79	988	661	196942	474079	1354790	237	66
RS-F103	38	0.2383	megahit	278196	1156264448	61.19	994	671	301273	661495	1912684	157	12
RS-F104	35	0.1119	megahit	65740	676868116	65.56	855	629	232632	466342	1223646	100	13
RS-L001	41	0.1259	megahit	66735	704131361	62.25	897	642	220402	456017	1245197	118	4
RS-L002	51	0.3969	megahit	284306	1519983163	56.06	1265	742	271705	674734	2195613	357	78
RS-L004	39	0.3146	megahit	618823	1149761078	62.15	1096	697	239234	575892	1879322	248	60
RS-L006	39	0.2879	megahit	371707	515051275	60.41	923	644	138508	308572	883132	114	21
RS-L008	42	0.2961	megahit	266988	921485532	59.35	997	667	226198	514359	1529708	172	34
RS-L010	43	0.262	megahit	210893	1600147165	62.56	1047	689	398757	878407	2680913	228	25
RS-L011	39	0.2033	megahit	129170	1143569160	61.69	975	666	310922	672163	1939445	170	16
RS-L012	41	0.2668	megahit	430662	850338858	60.85	1075	690	178527	431208	1381641	225	32
RS-L014	44	0.7516	megahit	426144	984739602	57.64	1909	854	88435	293219	1326668	414	55
RS-L015	36	0.1938	megahit	400212	765048885	61.36	1017	671	183822	420677	1273056	172	26
RS-T001	42	0.205	megahit	246828	814451258	62.6	1022	673	189648	440514	1344728	193	19
RS-T002	35	0.1512	megahit	328961	496789288	61.3	923	647	127692	291644	845316	131	17
RS-T004	46	0.089	megahit	146173	624906534	60.9	829	619	219212	440161	1109604	179	22
RS-T005	34	0.2773	megahit	246828	891826697	62.48	1127	701	180716	438080	1445655	441	72
RS-T006	30	0.1734	megahit	226431	484538710	61.06	861	629	152884	320008	831876	98	5
RS-T007	36	0.261	megahit	304627	654081446	61.03	1083	684	131573	326714	1039207	176	29
RS-T009	30	0.2801	megahit	520800	448902229	59.62	1205	708	77029	202831	692714	159	12
RS-T010	39	0.329	megahit	280744	539452049	61.27	976	658	127625	299652	889214	134	17
RS-T011	39	0.2257	megahit	627437	1153176896	61.49	1014	676	290862	645583	4583992	169	25
RS-T013	39	0.1925	megahit	360683	1035825139	61.87	965	663	281790	610960	1732077	132	19
RS-T014	38	0.2059	megahit	253403	955307504	62.22	973	663	238876	541886	1598343	175	24
RS-T015	46	0.1114	megahit	512373	783139495	62.63	871	632	243623	511324	1370890	136	26
RS-T016	42	0.1008	megahit	226549	612236174	62.76	889	638	181881	388335	1065391	107	21
RS-T017	39	0.081	megahit	169161	476940677	62.95	840	621	153209	320662	839252	79	15
RS-T018	44	0.2186	megahit	293837	1149535164	61.84	949	656	321444	692129	1928500	167	21
RS-T019	45	0.2084	megahit	121910	1245963501	61.86	964	666	349917	744894	2083790	163	17
RS-T020	46	0.1448	megahit	259851	989059536	62.39	917	648	290700	616494	1703518	138	22
RS-T021	39	0.1736	spades	272967	594149391	62.92	811	612	212138	425685	5166335	94	12
RS-T022	40	0.1905	megahit	315803	929412166	61.46	979	665	239755	533069	1532389	140	28
RS-T025	50	0.2576	megahit	289886	1810192784	61.22	1067	688	398053	938471	2899966	277	34
RS-T026	51	0.2439	megahit	187138	1826087684	61.61	962	663	505417	1086574	3037886	950	97
RS-T027	86	0.1783	megahit	182048	1075149148	60.29	963	664	306018	647738	1803252	131	8
RS-T028	40	0.1913	megahit	158153	960053454	61.33	941	657	279214	589212	1629452	127	20
RS-T029	37	0.2228	megahit	371692	1247609524	60.35	1055	690	301010	673781	2018253	631	57
RS-T030	38	0.2015	megahit	459752	916765612	61.23	993	674	243155	528458	1516569	115	15
RS-T032	40	0.0925	megahit	104536	551769001	60.65	872	633	175011	363344	966621	97	14
RS-T033	39	0.1532	megahit	99496	755934018	61.65	905	645	232644	483666	1291251	103	9
RS-T034	51	0.1587	megahit	225090	1129329893	60.68	970	661	308408	667415	1901318	174	19
RS-T035	46	0.1443	megahit	77529	891962763	60.94	892	639	271115	571280	1537529	1476	159
RS-T036	38	0.1843	megahit	306204	834566774	62.93	947	656	224605	493931	1420935	132	29
RS-T037	37	0.165	megahit	62045	783209966	61.37	905	648	249266	508327	1338554	103	9
RS-T039	47	0.2645	megahit	351649	709572380	60.65	1134	685	123699	332440	1147608	210	55
RS-T040	43	0.2102	spades	152417	725520664	63.02	756	595	300389	573718	7324194	102	12
RS-T041	50	0.2032	megahit	158443	1309953349	61.54	1006	670	321710	728895	2179125	237	36
RS-T042	44	0.1405	megahit	654625	861494760	60.53	875	631	262309	556972	1472644	157	35
RS-T043	38	0.1401	megahit	308565	770787614	62.94	891	640	238312	497177	1328495	122	14
RS-T044	44	0.1285	megahit	124551	827012301	61.89	895	640	251089	528256	1434686	147	27
RS-T045	43	0.1842	megahit	290473	1141653194	55.66	945	658	320061	687482	1793463	98	20
RS-T047	41	0.151	megahit	106718	886411533	61.78	962	657	240370	524312	1486682	130	14
RS-T049	36	0.253	megahit	366831	993931335	61.92	1064	695	232231	527141	1636418	210	47
RS-T050	32	0.2581	megahit	424743	742515520	58.59	1381	732	95535	289581	1114875	238	74
RS-T051	34	0.2551	megahit	177434	599357991	55.65	1091	684	123780	302125	961548	183	31
RS-T052	42	0.4243	megahit	371042	1258873010	56.12	1275	745	214592	546432	1857390	367	65
RS-T056	34	0.3123	megahit	274117	959491677	59.87	1280	742	163146	416776	1503599	264	29
RS-T057	41	0.1793	megahit	299792	1076715825	62.64	1042	679	248190	575860	1785450	238	36
RS-T058	37	0.2223	megahit	183987	1017437886	60.61	1019	679	253384	565322	1696383	214	25
RS-T059	40	0.3906	megahit	195167	882678186	56.61	1077	688	192251	454826	1404825	241	17
RS-T061	35	0.2941	megahit	210718	625524121	60.93	978	666	161328	358837	1059934	156	14
RS-T062	51	0.3058	megahit	199837	996445172	58.09	1045	673	221225	526143	1615748	276	37
RS-T063	34	0.2198	megahit	229325	953122782	61.51	1076	688	211541	494951	1573293	209	21
RS-T064	40	0.1724	megahit	371212	1101622465	63.6	979	662	285515	634499	1852713	196	43
RS-T065	39	0.2424	megahit	231025	1074704857	62.16	1139	697	206846	517719	1725858	246	44
RS-T066	39	0.2256	megahit	354694	866124251	59.45	1023	677	196093	461917	1362892	186	23
RS-T068	33	0.1836	megahit	220798	564108744	56.48	954	654	147914	330024	896964	140	20
RS-T069	41	0.1833	megahit	101235	1054318482	63.47	944	658	314171	653985	1835428	123	11
RS-T071	30	0.239	megahit	207455	478517774	61.87	937	653	129961	285561	812784	125	22
RS-T072	41	0.3049	megahit	409937	484293132	61.89	987	664	117025	269772	799580	100	16
RS-T075	33	0.2414	megahit	427767	341655591	58.91	1231	684	40686	139177	518172	120	32
RS-T076	38	0.2452	megahit	290740	728022973	59.69	1132	703	150449	359573	1156507	167	24
RS-T078	33	0.2019	megahit	148329	929986547	63.36	977	669	251169	543528	1580393	169	29
RS-T079	30	0.1313	megahit	193304	542152313	61.3	956	656	141009	315609	914488	147	27
RS-T080	31	0.1274	megahit	157844	605054408	60.4	941	653	167990	364355	1031065	133	22
RS-T081	48	0.2023	megahit	137805	1264416094	62.29	951	656	347598	755097	2154889	191	20
RS-T082	35	0.1895	spades	132929	538969542	61.84	824	614	185791	378044	4662519	92	10
RS-T083	33	0.1443	megahit	250046	717391289	62.57	886	638	212871	455010	1240845	120	25
RS-T084	35	0.1921	megahit	350302	907761353	62.97	939	657	266169	559524	1558713	153	21
RS-T085	37	0.2213	megahit	122690	1157012543	63.1	953	664	341025	710057	1995124	170	18
RS-T086	34	0.2975	megahit	249064	1037811815	62.91	1102	706	230316	530671	1694790	214	29
RS-T087	35	0.6325	megahit	537674	822126748	60.09	1868	885	83427	250033	1169533	293	34
RS-T088	31	0.1763	megahit	95496	382005022	60.38	860	628	120786	252736	664154	102	24
RS-T090	38	0.239	megahit	594049	933740835	61.54	1173	713	173187	435575	1493818	262	45
RS-T091	38	0.1502	megahit	246756	720346527	62.95	955	653	188889	421588	1223879	161	20
RS-T092	35	0.312	megahit	628163	831970643	63.05	1120	695	159743	402346	1337344	207	52
RS-T093	32	0.1096	megahit	103214	585813859	62.64	929	648	165865	358112	1008056	104	13
RS-T094	52	0.2481	megahit	102429	1783342469	61.88	1031	684	449847	990542	2941330	209	22
RS-T095	33	0.1585	megahit	169715	522478853	62.95	1214	711	83252	229154	831706	161	59
RS-T096	34	0.295	megahit	289886	631725706	62.69	1321	723	80914	250649	969777	210	61
RS-T097	43	0.2615	megahit	470036	1149306630	64.09	1131	700	224293	556198	1878085	259	31
RS-T098	33	0.1492	megahit	627503	557013514	62.73	1054	676	109064	278611	920919	147	38
RS-T099	34	0.1531	megahit	411939	809493711	64.97	965	658	202992	462193	1387848	164	23
RS-T100	34	0.1724	megahit	322426	632221002	65.68	902	648	197421	406966	1136261	105	17
RS-T101	45	0.2623	megahit	581673	1116333393	61.44	977	666	293765	645932	1841879	176	35
RS-T102	37	0.157	megahit	317608	827963182	66.42	923	648	242898	515099	1470528	134	17
RS-T103	34	0.2492	megahit	308279	445029319	63.55	921	645	115098	262241	761886	118	26
RS-T104	35	0.1024	megahit	83466	623538451	64.46	853	629	216002	431569	1130689	84	9
RS-T105	36	0.1436	megahit	67534	971087933	64.32	878	639	327391	655634	1729862	1063	96
RS-T106	41	0.1636	megahit	226534	1168494174	64.71	939	654	333614	712822	2033124	147	14
RS-T107	45	0.1981	megahit	441491	1325613501	64.05	993	670	344868	758742	2270009	223	30
RS-T108	30	0.1067	megahit	133430	421228259	64.13	897	635	117389	259627	734899	86	6
RS-T109	38	0.1545	megahit	314734	981278335	64.76	946	657	272630	589211	1687958	172	35
RS-T110	44	0.1127	megahit	483870	803459411	61.48	882	635	248306	520711	1395792	151	15
RS-T111	40	0.1688	megahit	205922	1094232263	61.86	1029	674	258262	594185	1804024	226	27
RS-T112	45	0.1639	megahit	167798	1228617726	60.25	1033	679	300347	674947	2021745	212	16
RS-T113	31	0.3188	megahit	312030	669890936	61.41	1204	705	107839	296421	1064148	201	37
RS-T114	34	0.1458	megahit	212970	760504984	61.3	1005	668	182805	419880	1260238	153	29
RS-T115	43	0.1392	megahit	205402	1003952429	61.51	950	657	278780	602168	1701652	158	28
RS-T116	41	0.1691	megahit	192178	859580383	60.96	948	652	225385	504042	1456044	177	19
RS-T117	36	0.1399	megahit	290815	685234601	61.53	955	656	175188	395822	1157452	158	28
RS-T118	48	0.184	megahit	294436	1066115443	61.63	1009	664	247931	581615	1775254	227	39
RS-T119	39	0.1442	megahit	138253	738007113	62.55	894	637	212386	460946	1275337	149	24
RS-T120	39	0.1874	megahit	511979	1006767967	61.25	976	662	252683	571930	1691412	227	44
RS-T121	32	0.1568	megahit	132190	837717436	63.7	972	666	231349	496030	1437424	148	13
RS-T122	43	0.2263	megahit	332018	1206023074	64.25	1003	673	309396	683577	2027994	213	22
RS-T124	40	0.1826	megahit	481106	1181281578	64.91	955	663	346097	722881	2039491	164	11
RS-T125	31	0.1737	megahit	151450	755864790	63.14	995	669	198682	434685	1276139	163	20
RS-T126	35	0.1525	megahit	146992	915851534	63.12	932	653	267131	565351	1581671	139	16
RS-T128	37	0.1421	megahit	803670	674386210	64.2	1019	670	151483	360227	1126386	182	33
RS-T128R	31	0.2606	megahit	459520	629112380	64.65	1071	685	124684	313010	1038908	172	31
RS-T129	32	0.3252	megahit	397879	493302412	63.9	1240	708	69354	206675	766270	178	42
RS-T130	39	0.1866	megahit	365098	921203420	64.64	904	647	286364	591684	1637154	164	20
RS-T131	33	0.1753	megahit	476187	734656404	65.66	907	647	226411	469588	1301458	140	18
RS-T132	39	0.277	megahit	353891	941342234	63.09	1133	696	177595	450316	1511299	241	60
RS-T134	31	0.1576	megahit	475953	726843269	64.57	946	654	195287	430428	1241150	140	21
RS-T135	52	0.1536	megahit	175674	1210562149	64.43	904	644	368107	770952	2131050	139	5
RS-T137	36	0.1839	megahit	312429	929755683	64.13	919	649	263545	569200	1610883	166	39
RS-T138	30	0.1601	megahit	189481	761693312	65.54	932	654	230794	478470	1344131	105	9
RS-T139	38	0.2071	megahit	859990	1184671472	65.51	1032	683	294150	653622	1989668	1090	89
RS-T140	36	0.1933	megahit	92233	1107453338	63.76	979	669	301959	650070	1892995	164	14
RS-T141	41	0.1859	megahit	84272	1177677970	64.39	964	665	329957	703545	2021160	179	27
RS-T142	39	0.1672	megahit	70258	1060277949	65.32	931	654	315824	660690	1861337	146	14
RS-T143	36	0.1523	megahit	245441	831512132	61.96	909	644	239861	516048	1438648	188	34
RS-T144	33	0.1302	megahit	114062	794760178	63.32	887	641	263764	530755	1400320	106	13
RS-T146	47	0.1854	megahit	302433	1209424666	62.4	913	650	372305	770412	2108520	288	37
RS-T147	39	0.1767	megahit	94403	1147529364	64.35	939	657	338910	709806	1993399	172	20
RS-T148	37	0.1798	megahit	533898	1032043221	65.37	953	658	284468	616079	1774074	168	36
RS-T149	38	0.2014	megahit	289777	1006489201	64.06	999	670	255885	569348	1712319	168	21
RS-T150	31	0.1866	megahit	71721	942494613	66.5	966	663	259491	558899	1634590	150	18
RS-T151	34	0.1547	megahit	139779	873127928	64.95	937	654	248827	532552	1527534	145	13
RS-T152	37	0.1777	megahit	212190	982121404	64.04	951	657	265251	581348	1688188	158	21
RS-T153	32	0.1643	megahit	701984	878028211	64.99	984	668	240261	515736	1495547	600	48
RS-T154	34	0.1662	megahit	407831	877262707	64.98	927	650	251716	538825	1532285	241	25
RS-T155	33	0.1323	megahit	119359	747801806	65.13	902	645	230708	479385	1326622	778	69
RS-T156	33	0.136	megahit	162227	794061867	64.52	920	649	237880	498888	1389955	123	21
RS-T157	37	0.1732	megahit	88821	1154003452	65.67	947	657	330545	702359	2011454	204	14
RS-T158	39	0.2146	megahit	288725	1244441235	63.57	1068	689	285555	656032	2056739	213	37
RS-T159	26	0.1829	spades	95009	446407074	63.43	809	612	165533	326014	3737172	75	12
RS-T160	32	0.1095	megahit	538982	526928802	61.64	862	630	162835	344145	916926	209	39
RS-T161	35	0.1158	megahit	225285	704911999	62.79	898	642	211469	447156	1226604	152	29
RS-T162	40	0.1548	megahit	289098	952005239	64.33	944	657	273047	579861	1637781	153	21
RS-T163	42	0.186	megahit	369313	1163439073	64	977	668	305525	671949	1977604	241	23
RS-T164	33	0.1928	megahit	394576	1061541173	61.6	1043	684	247113	567715	1745195	185	34
RS-T165	41	0.3331	megahit	400288	1124541671	64.02	964	662	305706	663807	1942142	189	35
RS-T166	36	0.087	megahit	188083	1155045414	66.23	996	673	299540	658594	1999724	185	27
RS-T169	35	0.1697	megahit	221746	783625817	62.01	1012	669	186380	429855	1316753	491	60
RS-T170	38	0.2353	megahit	230121	950488391	63.18	983	665	242519	542074	1617578	192	17
RS-T171	36	0.1452	megahit	298002	776489656	63.31	913	646	231318	488188	1349521	138	15
RS-T172	34	0.1002	megahit	365098	543657851	62.34	836	623	186847	377424	976378	84	14
RS-T173	35	0.1789	megahit	365926	852453770	63.37	1043	681	188146	446748	1422569	569	75
RS-T174	40	0.2728	megahit	289886	753226901	62.79	941	658	206899	450035	1288269	163	40
RS-T175	32	0.2279	megahit	240196	550385038	60.58	985	663	124962	299070	915547	175	35
RS-T176	40	0.2756	megahit	184006	1007244880	64.53	1029	682	242890	549306	1697126	210	42
RS-T177	47	0.2469	megahit	289886	914110336	63.02	923	649	257339	557530	1569545	186	37
RS-T179	33	0.1825	megahit	400281	591017818	59.73	1588	790	68701	206816	869847	242	43
RS-T180	32	0.1223	megahit	390619	554223526	63.44	885	637	163798	351301	2147800	220	30
RS-T182	32	0.1621	megahit	365098	603679978	64.19	853	631	211773	419856	1103819	88	9
RS-T186	43	0.242	megahit	219104	1116234380	63.02	958	659	305619	662881	1911638	168	16
RS-T187	35	0.3296	megahit	303627	836168523	61.35	1091	691	179701	426562	1365255	221	26
RS-T188	34	0.2616	megahit	673198	880923833	62.12	1046	684	204261	470247	1453988	205	26
RS-T189	32	0.1806	megahit	93512	879261502	64.75	1002	674	229375	501908	1497609	180	25
RS-T190	36	0.2141	megahit	350539	1232580346	64.23	1091	698	279231	640041	2029448	200	22
RS-T191	33	0.1709	megahit	155763	887461303	62.11	945	656	250119	536779	1516114	163	23
RS-T192	34	0.2155	megahit	171573	943489192	63.73	999	672	242934	536215	1601658	191	23
RS-T193	34	0.2183	megahit	313161	731880501	60.49	1014	667	168448	396174	1206571	168	27
RS-T194	30	0.1766	megahit	98837	823468789	66.45	947	663	244390	507972	1450272	112	11
RS-T195	38	0.1697	megahit	53530	1026061723	66.16	923	652	313784	649382	1816385	158	12
RS-T196	37	0.1504	megahit	103043	895714700	64.49	955	661	259386	545953	1557905	211	15
RS-T197	36	0.1356	megahit	57793	847001815	64.38	917	651	262437	540452	1498814	227	18
RS-T198	39	0.1685	megahit	181266	977579718	63.4	983	666	255083	562933	1635051	933	104
RS-T199	36	0.3113	megahit	480707	1316438342	63.42	1248	735	230774	584755	2046373	269	46
RS-T200	34	0.1235	megahit	125523	754565383	64.28	864	633	252466	510873	1354268	100	7
RS-T201	37	0.2605	spades	203285	887559745	64.63	817	617	321166	637598	6554996	116	19
RS-T202	41	0.238	megahit	287735	1310090447	61.82	1086	691	277944	665483	2129144	276	41
RS-T203	42	0.1811	megahit	224996	1078943229	63.06	942	652	294843	645260	1835037	196	37
RS-T204	36	0.1472	megahit	265975	524600103	60.58	998	658	115526	281579	862881	145	24
RS-T205	44	0.2424	megahit	435119	1655403874	62.56	1053	688	396251	892221	2691976	229	26
RS-T206	32	0.1617	megahit	161626	849723014	63.32	996	668	205248	471067	1421878	161	29
RS-T207	43	0.1741	megahit	271293	1256989343	63.78	1004	671	318253	708681	2106375	209	23
RS-T208	35	0.2557	megahit	479387	737300932	64.46	965	657	183361	419627	1252766	148	26
RS-T209	37	0.1424	megahit	59504	891460130	65.12	922	648	263711	556695	1567938	139	6
RS-T210	33	0.2553	megahit	226172	686439016	63.55	1133	699	130553	329049	1125607	177	38
RS-T211	38	0.1903	megahit	173845	880158630	63.91	938	657	254934	539552	1540822	149	21
RS-T212	33	0.2029	megahit	196439	705103743	64.24	964	660	186305	411478	1212075	132	19
RS-T213	40	0.2294	megahit	163359	1177122433	65.05	1018	679	301431	662221	1989756	206	27
RS-T214	37	0.2831	megahit	248009	667508211	63.78	971	661	167267	379836	1142985	150	22
RS-T215	38	0.137	megahit	121107	840453372	63.79	922	650	248650	524554	1467349	124	6
RS-T216	30	0.1461	megahit	98033	712234659	66	920	649	210023	444147	1257145	118	19
RS-T217	33	0.1433	megahit	125830	573740410	63.04	878	637	185393	379980	1023557	98	8
RS-T218	31	0.1315	megahit	737462	598213461	64.51	850	628	197347	404711	1071848	107	26
RS-T219	35	0.2892	megahit	223130	867498006	63.26	1081	687	182665	440670	1431916	206	29
RS-T221	39	0.2146	megahit	160889	1433896922	63.45	994	675	385983	830809	2410637	223	25
RS-T222	74	0.1458	megahit	202618	724819545	62.06	965	658	191744	423521	1234388	139	23
RS-T223	36	0.1666	megahit	195598	938986440	64.38	948	653	260875	564491	1619997	201	18
RS-T224	31	0.1476	megahit	67614	777521786	61.92	957	658	215177	464498	1319216	158	10
RS-T225	41	0.2043	megahit	137292	1283005418	63.24	1010	675	328665	724737	2147380	247	25
RS-T226	46	0.2766	megahit	229054	1823754770	65.94	1100	702	414016	943936	3023894	405	42
RS-T227	42	0.1392	megahit	649348	1003972415	63.88	904	645	309597	643188	1749497	121	11
RS-T228	34	0.0967	megahit	124932	535339438	64.49	842	623	179987	367189	959685	106	13
RS-T229	37	0.1982	megahit	82293	1216210202	65.46	985	669	329646	710667	2088279	176	19
RS-T230	33	0.2618	megahit	466039	873518806	64.78	1111	698	177785	431884	1430185	198	33
RS-T231	31	0.2368	megahit	234337	1110796571	64.94	1080	698	258653	584967	1838325	214	28
RS-T232	31	0.1702	megahit	175930	787212562	64.39	1054	684	185222	422219	1313882	575	67
RS-T233	33	0.1656	megahit	182362	754570651	63.93	953	656	202451	445380	1304904	133	26
RS-T234	40	0.1692	megahit	97113	978097083	65.86	918	646	273265	595925	1714723	167	23
RS-T235	39	0.1818	spades	293825	481886693	61.09	787	603	177428	354518	4647146	81	12
RS-T237	38	0.1679	spades	247326	526550439	63.42	762	597	212687	409869	5257455	84	9
RS-T239	33	0.1586	megahit	111178	491472316	61.68	923	643	134596	297005	831863	141	10
RS-T240	46	0.1419	megahit	91814	1042776447	63.66	899	643	319698	667590	1817396	138	23
RS-T241	50	0.3123	megahit	468182	1363873248	62.46	1067	687	302765	710413	2227466	389	36
RS-T242	37	0.5346	megahit	288714	884849857	60.51	1519	808	127590	333671	1330355	233	15
RS-T243	34	0.1576	megahit	217807	831879598	63.95	883	638	259563	540799	1470014	119	13
RS-T244	32	0.1653	megahit	165414	727973817	65.02	924	650	208894	447471	1275356	134	14
RS-T245	37	0.2863	megahit	208223	797037025	59.63	1135	706	159924	388149	1277569	194	28
RS-T246	36	0.1933	megahit	110059	899187422	61.86	973	664	242047	526597	1537802	788	91
RS-T247	40	0.1947	megahit	175944	1001759695	63.11	1028	680	243709	549097	1681667	1076	111
RS-T248	38	0.1374	megahit	174512	734359928	61.51	952	655	197047	433831	1257117	885	111
RS-T249	36	0.1852	spades	237976	418864495	60.36	826	612	131825	281494	3792547	85	9
RS-T250	36	0.1215	megahit	97500	652959255	60.42	890	639	207303	426924	1139988	129	12
RS-T251	33	0.1578	megahit	115913	663910163	62.04	962	663	176031	387445	1133614	140	18
RS-T252	35	0.1244	megahit	142017	614406881	58.34	886	633	177467	386283	1056230	162	32
RS-T253	39	0.1194	megahit	90444	699039870	62.8	905	643	211769	444665	1218060	135	23
RS-T254	39	0.1357	megahit	292351	758756819	62.38	889	638	228391	484379	1322003	138	28
RS-T255	38	0.1652	megahit	405810	800758819	61.01	1091	683	155616	394457	1292740	417	91
RS-T256	37	0.1805	megahit	149914	950771345	60.11	935	653	271675	581077	1608420	193	19
RS-T258	37	0.1144	megahit	388529	663005942	62.64	847	626	226989	457639	1180930	124	18
RS-T260	41	0.1158	megahit	213009	701261902	60.47	875	633	216382	455469	1194314	124	34
RS-T261	36	0.1812	megahit	71249	834817608	62.51	939	657	252775	522502	1442332	123	10
RS-T262	34	0.0582	megahit	119593	284313051	58.88	783	603	106850	211517	515004	60	5
RS-T263	38	0.1728	spades	57646	507760164	62.5	753	595	212724	404327	5045388	67	6
RS-T264	36	0.0691	megahit	56096	409367400	62.02	781	605	160588	310999	754545	56	6
RS-T265	31	0.1732	spades	53866	456937740	61.01	776	601	182380	351639	4413580	76	8
RS-T266	51	0.1415	megahit	157498	1072084707	64.1	873	635	346106	711075	1894795	753	67
RS-T268	34	0.0765	megahit	69111	397161319	63.6	823	618	139919	280927	712675	58	9
RS-T269	29	0.0563	megahit	74187	302786039	61.78	779	603	118626	230402	551717	46	5
RS-T270	34	0.1908	spades	292421	561730239	62.84	773	601	220412	428677	5159078	82	11
RS-T271	36	0.1114	megahit	70950	624799118	62.35	847	628	221521	438342	1115486	109	9
RS-T272	34	0.188	megahit	319561	510849879	59.71	1093	683	98943	251388	815510	164	28
RS-T274	38	0.1293	megahit	146319	641003709	60.95	866	634	208879	428139	1121110	112	18
RS-T276	31	0.1022	megahit	58953	421577083	60.36	867	633	143006	287161	739676	72	6
RS-T277	43	0.1359	megahit	283581	807599822	62.67	851	631	274613	553653	898659	131	14
RS-T278	40	0.116	megahit	226215	595689102	62.72	873	634	190590	393749	1047205	102	15
RS-T279	43	0.1176	megahit	258171	627493138	61.47	850	627	210333	428106	1102502	107	17
RS-T280	34	0.1448	megahit	180298	608066250	60.55	973	663	162303	354938	1021437	125	19
RS-T281	36	0.1335	megahit	124517	672832838	62.22	901	643	203831	428138	1163050	117	9
RS-T282	44	0.1304	megahit	190082	776302999	62.3	879	636	242380	505663	1355987	119	18
RS-T282R	35	0.123	megahit	185876	572006858	62.58	869	633	179578	375163	1006090	80	18
RS-T283	35	0.1545	megahit	518093	535708051	61.9	1027	669	115474	281214	882659	137	20
RS-T284	39	0.16	megahit	125535	906512046	62.03	938	657	266134	559209	1553284	140	18
RS-T285	32	0.1012	megahit	83816	491347246	61.36	879	635	158648	325596	854885	85	6
RS-T286	42	0.2024	megahit	49011	1132851030	63.18	922	655	360678	730010	1967389	129	9
RS-T287	27	0.1765	megahit	215966	337658099	60.72	943	650	90676	200575	567977	108	18
RS-T289	40	0.1462	megahit	406306	736450977	63.22	921	649	216831	458678	1261265	145	18
RS-T290	39	0.1652	megahit	270971	878631883	61.75	991	672	231883	506025	1469939	130	19
RS-T291	33	0.3053	megahit	85108	544983772	61.13	863	633	188571	375248	957467	88	5
RS-T292	43	0.1248	megahit	46800	675524766	61.94	855	631	237022	469813	4813023	301	25
RS-T294	39	0.1314	megahit	336853	661954038	61.69	913	646	202169	421063	1143239	109	14
RS-T295	44	0.1698	megahit	111698	998316347	63.01	952	659	279451	599986	1714266	156	17
RS-T297	31	0.1795	megahit	281722	516347762	58.02	980	667	137532	300116	857879	139	22
RS-T298	30	0.1882	spades	89202	377459590	60.4	776	603	154209	293671	3391477	66	7
RS-T299	41	0.1272	megahit	80313	771584682	63.48	882	638	250337	511104	1354093	102	7
RS-T300	35	0.1154	megahit	84085	602314134	62.34	875	635	192733	397696	1052516	560	66
RS-T301	38	0.1745	megahit	143981	957657371	61.86	944	658	272337	581141	1620478	871	107
RS-T302	31	0.1666	spades	164855	323995329	61.62	811	605	98786	216325	3329395	82	21
RS-T303	37	0.1262	megahit	79286	651701015	63.17	854	631	226872	451603	1156711	85	7
RS-T304	30	0.1575	spades	308245	383004225	60.98	960	645	94768	219430	2919831	125	22
RS-T305	33	0.1576	spades	112472	374698739	61.49	755	595	161326	302484	3813980	44	1
RS-T306	45	0.104	megahit	85531	733473819	62.44	836	625	264171	520816	1309699	404	31
RS-T307	27	0.1128	megahit	1416919	278903113	59.97	852	627	92310	189058	477093	61	12
RS-T308	39	0.1888	spades	23458	564919770	62.97	764	600	241237	451823	5121845	53	0
RS-T309	40	0.1361	megahit	270659	840276084	61.36	888	641	265133	547651	1448445	125	16
RS-T310	37	0.1794	megahit	258492	956801795	63.39	944	656	275903	584731	1651777	154	22
RS-T311	38	0.079	megahit	52564	468601335	61.98	776	605	190563	363132	851806	123	8
RS-T312	34	0.2523	megahit	392077	647510697	58.99	1447	771	94118	253270	974978	292	34
RS-T313	38	0.1179	megahit	193414	624143916	63.9	837	623	215024	433855	1129266	113	14
RS-T314	36	0.1433	spades	221278	318250703	59.59	738	587	131489	253632	3948770	62	5
RS-T315	41	0.1399	megahit	216772	889895669	62.71	871	635	283817	587169	1538755	133	14
RS-T316	38	0.0833	megahit	301339	501256073	64.06	843	623	167284	342628	897592	81	7
RS-T317	31	0.1017	megahit	409650	519495444	62.72	824	621	187067	370823	942226	82	14
RS-T318	34	0.1352	megahit	323705	622059106	62.28	975	660	146713	344806	1043348	154	32
RS-T319	37	0.114	megahit	339123	632905872	62.18	849	630	218106	437163	1112340	102	19
RS-T321	37	0.2118	megahit	581723	977543023	63	1017	675	237054	538140	1634330	178	25
RS-T323	44	0.364	megahit	581723	1040861437	62.17	1148	703	194078	492056	1692525	278	53
RS-T325	32	0.0855	megahit	366595	697500621	63.2	1003	669	173948	391209	1175312	168	34
RS-T328	129	0.1268	megahit	672346	2136394410	64.31	1105	699	461112	1083168	3521438	374	61
RS-T330	35	0.0889	megahit	447851	1135578479	64.85	1033	682	269751	614851	1932167	201	37
RS-T333	32	0.219	megahit	534937	1027696107	61.55	1138	702	205754	501005	1658111	256	56
RS-T334	38	0.4214	megahit	332876	1634533478	63.55	1404	770	242422	648720	2504836	476	103
RS-T335	36	0.3369	megahit	604085	1261321308	61.99	1211	728	234223	578781	1964242	290	54
RS-T336	60	0.2965	megahit	409022	716469069	61.42	1216	715	118006	316421	1117896	228	57
RS-T337	31	0.3244	megahit	398898	866290612	61.22	1367	744	121098	344587	1342651	246	63
RS-T339	34	0.2123	megahit	758995	715319916	62.93	1123	692	141581	350176	1154004	194	33
RS-T342	35	0.285	megahit	812714	904986173	63.46	1242	725	146180	392714	1443229	260	65
RS-T343	31	0.2448	spades	554090	621962760	61.2	1001	653	124252	322148	4392827	184	55
RS-T344	33	0.1635	megahit	549064	898952898	62.2	1213	712	146074	396238	1415846	243	68
RS-T345	29	0.2485	megahit	320029	1228245681	60.02	1373	768	185316	493717	1826161	313	73
RS-T351	30	0.2326	megahit	248649	447428877	62.69	857	626	133398	288541	793796	106	33
RS-T356	34	0.1464	megahit	164116	866156492	62.86	938	652	231404	513203	1469490	168	38
RS-T357	32	0.1219	megahit	136274	676391351	64.61	854	631	232144	465321	1223564	90	15
RS-T358	33	0.259	megahit	353657	808891325	64.08	1090	688	170679	410413	1332222	160	23
RS-T359	31	0.2126	megahit	272260	759701548	63.12	990	665	193847	432590	1283582	177	20
RS-T360	34	0.1615	megahit	273746	638294607	62.35	945	652	166633	373760	1089781	167	26
RS-T363	31	0.1367	megahit	295910	660887556	64.27	908	647	200153	418853	1164996	122	16
RS-T364	37	0.2373	megahit	422418	1178203897	66.64	1011	675	290778	654524	2014903	188	27
RS-T372	33	0.4449	megahit	445498	404617455	57.18	1504	769	51454	149760	608629	179	24
RS-T373	40	0.6062	megahit	826258	853294608	60	1663	823	99205	289478	1252109	299	37
RS-T374	62	0.2427	megahit	404359	2491196663	65.17	1047	685	596220	1346957	4165998	316	36
RS-T375	47	0.2087	megahit	507974	1206399179	62.24	1038	680	284812	651631	2014444	241	40
RS-T376	32	0.2466	megahit	470902	533955208	62.78	967	659	139431	309793	914659	125	15
RS-T378	46	0.2202	megahit	708784	971280521	61.83	1069	674	186893	481530	1575468	260	56
RS-T379	33	0.3466	megahit	310568	812111729	61.25	1215	715	140761	365781	1297323	221	50
RS-T380	31	0.1636	megahit	232391	749321557	64.43	965	662	205405	443942	3319494	331	50
RS-T381	33	0.1654	megahit	246539	911438582	62.63	1454	766	125282	350146	1398681	298	60
RS-T382	39	0.1293	megahit	336498	977384425	64.18	1172	700	174485	453401	1575756	256	47
RS-T384	32	0.2214	megahit	226694	558849675	61.76	1099	688	113353	278354	920594	143	31
RS-T385	35	0.1543	megahit	285355	604518787	63.05	1017	665	137853	326235	1015233	154	23
RS-T387	41	0.2878	megahit	966567	1389369226	64.11	1196	714	248380	635650	2218071	328	61
RS-T388	36	0.1854	megahit	189730	880240051	61.99	1178	711	170827	418267	1427399	1875	177
RS-T389	38	0.285	megahit	568527	1043189766	62.35	1243	721	167720	453213	1644325	274	56
RS-T390	32	0.2477	megahit	544470	637834869	62.48	1029	672	136184	332806	1048255	176	36
RS-T391	42	0.169	megahit	352143	983719758	61.94	1060	682	219330	515481	1635068	219	41
RS-T392	30	0.3129	megahit	136149	548279543	65.99	911	647	163008	344323	975917	89	11
RS-T393	49	0.3568	megahit	809146	1291450688	60.64	1260	732	210234	557796	2022681	358	77
RS-T394	30	0.1629	megahit	470902	409169283	60.89	1002	662	91538	220258	682273	125	27
RS-T395	44	0.2436	megahit	863501	1158912703	61.65	1220	723	205267	523073	1831712	285	65
RS-T396	34	0.1447	megahit	418869	918354517	61.47	1579	821	118737	327509	1367107	269	41
RS-T398	60	0.435	megahit	581723	2224898675	59.88	1382	767	348796	907008	3318243	402	63
RS-T399	35	0.4336	megahit	350902	1127791034	55.61	1458	782	169161	442600	1579546	604	70
RS-T402	33	0.1235	megahit	347226	1172816191	62.7	1182	724	232377	556910	1903162	270	42
RS-T404	35	0.1188	megahit	715268	899664121	62.72	1158	703	161390	418066	1449985	234	63
RS-T408	39	0.2062	megahit	801886	839547374	62.54	1014	667	188319	449883	1387424	184	32
RS-T409	42	0.1484	megahit	268923	809430526	59.33	930	647	218984	484514	1370441	173	27
RS-T410	35	0.3422	megahit	225097	992682271	63.07	1346	746	151642	408485	1535566	295	50
RS-T411	43	0.2171	megahit	537189	1403542587	63.18	1049	684	318367	741821	2327546	259	50
RS-T412	37	0.5135	megahit	237010	476225418	60.38	817	616	166316	336239	848161	87	18
RS-T413	34	0.337	megahit	316011	830129628	65.05	938	652	225716	495804	1433153	158	26
RS-T414	30	0.1948	megahit	227241	686253912	62.6	1011	671	169754	382424	1155754	151	26
RS-T415	39	0.1779	megahit	378249	1057625842	63.24	1013	672	260350	587662	1770653	197	27
RS-T416	38	0.1698	megahit	177730	927064448	60.56	1080	692	211124	485259	1520705	183	26
RS-T418	39	0.1179	megahit	132934	761174027	61.7	877	636	242860	501449	1344920	119	15
RS-T419	35	0.1089	megahit	88458	604726284	63.6	854	628	205560	414656	1084955	95	10
RS-T420	42	0.1017	megahit	464561	630285570	62.95	851	624	192176	411754	1109404	97	13
RS-T421	40	0.1434	megahit	231374	975812072	63.11	918	644	271739	594626	1671241	173	40
RS-T423	34	0.6457	megahit	744762	236289897	60.93	1201	696	37080	104398	368487	75	18
RS-T424	41	0.1557	megahit	166724	1047722502	64.98	901	644	332844	681442	1847354	131	17
S-A003R	51	0.2862	megahit	130616	1970455921	61.52	999	676	518923	1128594	3238243	211	19
S-A007	30	0.292	megahit	156662	1127002788	65.73	1175	719	227027	541093	1833591	233	36
S-A068	42	0.3755	megahit	147681	1881814708	60.78	1220	732	354874	865863	2926635	302	27
S-B014	47	0.335	megahit	163766	1930071308	60.98	1132	713	430279	978629	3061388	279	31
S-B062	37	0.1498	megahit	48209	810883418	61.67	895	646	264462	534728	1400450	116	6
S-B108	37	0.1845	megahit	135301	1045710177	60.01	988	669	281478	608737	1736543	148	10
S-B123	31	0.1857	spades	62684	481559533	62.43	800	607	180086	355067	4451939	93	2
S-B131	37	0.2198	megahit	115146	1212828527	61.94	1000	676	322791	697772	2009884	163	14
S-C015	41	0.1514	megahit	76267	961826280	63.68	921	649	290226	606251	1668115	124	12
S-C035	43	0.112	megahit	80550	828449939	62.26	857	630	281635	567282	1472411	105	4
S-C045	33	0.1193	megahit	121826	631251703	62.2	896	642	200432	411439	1108099	100	7
S-C073	71	0.1015	megahit	71649	543519875	61.14	858	629	179548	367099	950272	91	7
S-E072	50	0.1951	megahit	155857	1484740066	62.21	994	671	391893	854468	2482381	227	31
S-L019	41	0.1986	megahit	130446	1195500178	63.93	952	659	341168	724735	2073324	158	15
S-T004	34	0.1457	megahit	99341	844568628	63.66	912	645	253623	533353	1469074	119	13
S-T020	45	0.3066	megahit	129655	1769467335	61.08	1036	687	446705	980416	2878800	233	20
S-T034	32	0.1734	megahit	140335	840669033	62.63	943	656	238609	510159	1425400	137	19
S-T037	41	0.2447	megahit	82916	1249923757	61.83	976	668	351982	745351	2097331	176	8
S-T046R	51	0.2374	megahit	94636	1824557628	64.52	1018	680	474375	1032804	3086700	272	27
S-T048	31	0.1506	megahit	229551	718964178	65.15	919	648	214111	450692	1262188	104	8
S-T059	39	0.3008	megahit	90712	1588701067	64.46	1060	694	394667	866523	2634445	246	22
S-T063	31	0.5173	megahit	206044	1531553648	64.7	1476	799	217620	581826	2335226	333	63
S-T065	38	0.2529	megahit	74942	1269003529	64.75	1017	678	327948	716884	2171371	223	26
S-T070	30	0.3354	megahit	109791	1419854783	62.38	1202	730	286700	674829	2238558	236	26
S-T086	43	0.2562	megahit	253881	1471802324	64.74	1131	705	311197	733381	2399565	324	49
S-T092	61	0.3815	megahit	330542	1475320973	61.47	1343	762	242664	617966	2282807	344	78
S-T093	34	0.2457	megahit	133548	1103663642	60.94	1061	691	267754	596177	1781713	175	9
S-T094	43	0.3407	megahit	133453	1902273352	60.97	1124	713	428880	971070	3036828	251	22
S-T100	46	0.1732	megahit	225169	1330788336	64.46	944	656	382753	812622	2284288	202	22
S-T100R	38	0.1867	megahit	337219	1040893731	62.18	958	661	285404	618127	1753015	168	26
S-T129	38	0.1983	megahit	304747	1201080072	64.22	1010	675	299920	670773	2026686	198	16
S-T158	31	0.2254	megahit	175326	1126552163	64.49	1109	701	241378	568328	1836008	190	22
S-T167	35	0.1776	megahit	117801	1042261185	63.81	1009	673	262853	585291	1730351	184	22
S-T175	35	0.2657	megahit	282051	1439166453	65.24	1172	722	297217	697358	2321023	262	36
S-T205	43	0.2001	megahit	1383544	1361613049	64.68	1044	685	331383	742080	2280970	241	22
S-T254	39	0.3	megahit	246155	1592016432	63.88	1260	730	251816	681062	2456033	357	85
S-T295	31	0.2126	megahit	208555	1010049296	62.62	1013	678	262167	572295	1693180	160	19
S-T324	41	0.1771	megahit	208612	1281116640	64.14	1017	675	323347	717611	2148777	232	34
S-T398	34	0.1765	megahit	95727	915756773	65.58	1023	677	227364	508161	1548310	185	33
