# Supplementary material for: A quantitative microbiome atlas reveals hidden diversity, eukaryotic keystones, and evolutionary trade-offs in plant rhizospheres
Source: Research Square preprint supplement (doi:10.21203/rs.3.rs-7503976/v1), 2025-09-12
Supplement: Supplementary file 2 [file 0969d0b2177b13147faceba7.xlsx]

## Sheet: Supplemental Table 1
Supplementary Information Table 1: Metadata for 1,549 standardized rhizosphere samples from 590 vascular plant species in the One Thousand Plant Microbiomes Project (1KPM).​​ This table details the taxonomic identity, environmental context, sampling location, and plant traits for all rhizosphere samples analyzed in the 1KPM study. Samples were collected from diverse vascular plants (ferns, gymnos…
TreeID	FileID	Phylum	Class	Order	Family	Genus	Species	Weather	Habitat	Moisture	Environment	Morphology	RootDepth	RhizosphereWeight	GrowthStage	SoilType	SoilColor	LeafSPAD	LeafNitrogen	LeafMoisture	LeafTemperature	Location	DetailLocation	Latitude	Longitude	Elevation
C006	HF_RS10	Tracheophyta	Liliopsida	Alismatales	Araceae	Aglaonema	Aglaonema simplex	Sunny	Skiophyte	Moist	Reserve	Herb	0-5cm	80	Vegetative	Loamy	Brown	36.6	14.23	56.93	17.83	Moli Rainforest	Moli Rainforest	24.1077	97.9861	822
B036	HE_RS11	Tracheophyta	Liliopsida	Alismatales	Araceae	Alocasia	Alocasia longiloba	Sunny	Skiophyte	Moist	Hillside	Herb	0-5cm	91.3	Vegetative	Loamy	Brown	27.2	11.23	44.93	18.66	Botanical Garden	Botanical Garden	24.069	97.8192	1113
B036	HE_RS05	Tracheophyta	Liliopsida	Alismatales	Araceae	Alocasia	Alocasia longiloba	Sunny	Skiophyte	Moist	Hillside	Herb	0-5cm	103.3	Vegetative	Loamy	Brown	27.2	11.23	44.93	18.66	Botanical Garden	Botanical Garden	24.069	97.8192	1113
B036	HE_RS12	Tracheophyta	Liliopsida	Alismatales	Araceae	Alocasia	Alocasia longiloba	Sunny	Skiophyte	Moist	Hillside	Herb	0-5cm	116.1	Vegetative	Loamy	Brown	27.2	11.23	44.93	18.66	Botanical Garden	Botanical Garden	24.069	97.8192	1113
T188	KF_RS12	Tracheophyta	Liliopsida	Alismatales	Araceae	Alocasia	Alocasia odora	Sunny	Heliophyte	Moist	Park	Herb	0-5cm	258.5	Vegetative	Loamy	Brown	22.7	9.8	39.2	23.37	City Park	Nanmao Lake	24.0118	97.8693	726
T188	KF_RS21	Tracheophyta	Liliopsida	Alismatales	Araceae	Alocasia	Alocasia odora	Sunny	Heliophyte	Moist	Park	Herb	0-5cm	103.8	Vegetative	Loamy	Brown	22.7	9.8	39.2	23.37	City Park	Nanmao Lake	24.0118	97.8693	726
T188	CA_RS02	Tracheophyta	Liliopsida	Alismatales	Araceae	Alocasia	Alocasia odora	Sunny	Heliophyte	Moist	Park	Herb	0-5cm	104	Vegetative	Loamy	Brown	22.7	9.8	39.2	23.37	City Park	Nanmao Lake	24.0118	97.8693	726
T313	FB_RS20	Tracheophyta	Liliopsida	Alismatales	Araceae	Alocasia	Alocasia odora	Sunny	Heliophyte	Moist	Reserve	Herb	0-5cm	102.8	Vegetative	Loamy	Brown					Moli Rainforest	Moli Rainforest	24.1113	97.986	832
T313	FB_RS21	Tracheophyta	Liliopsida	Alismatales	Araceae	Alocasia	Alocasia odora	Sunny	Heliophyte	Moist	Reserve	Herb	0-5cm	121.1	Vegetative	Loamy	Brown					Moli Rainforest	Moli Rainforest	24.1113	97.986	832
T313	FB_RS19	Tracheophyta	Liliopsida	Alismatales	Araceae	Alocasia	Alocasia odora	Sunny	Heliophyte	Moist	Reserve	Herb	0-5cm	100.3	Vegetative	Loamy	Brown					Moli Rainforest	Moli Rainforest	24.1113	97.986	832
T037	LQ_RS05	Tracheophyta	Liliopsida	Alismatales	Araceae	Amorphophallus	Amorphophallus konjac	Sunny	Skiophyte	Moist	Hillside	Herb	5-10cm	98.7	Vegetative	Loamy	Brown	24.33	10.53	41.47	22.77	Botanical Garden	Botanical Garden	24.0704	97.8182	1117
T037	LQ_RS06	Tracheophyta	Liliopsida	Alismatales	Araceae	Amorphophallus	Amorphophallus konjac	Sunny	Skiophyte	Moist	Hillside	Herb	5-10cm	98.1	Vegetative	Loamy	Brown	24.33	10.53	41.47	22.77	Botanical Garden	Botanical Garden	24.0704	97.8182	1117
T084	HA_RS12	Tracheophyta	Liliopsida	Alismatales	Araceae	Colocasia	Colocasia esculenta	Sunny	Heliophyte	Moist	Hillside	Herb	5-10cm	72.3	Vegetative	Loamy	Brown	21.2	9.3	37.2	29.31	Wanding Town	Huihuan River	24.12	98.0421	851
B123	HD_RS24	Tracheophyta	Liliopsida	Alismatales	Araceae	Lasia	Lasia spinosa	Sunny	Skiophyte	Moist	Hillside	Herb	0-5cm	118.2	Vegetative	Loamy	Brown	24.1	10.27	41.07	17.31	Botanical Garden	Botanical Garden	24.0684	97.8191	1068
B123	HD_RS22	Tracheophyta	Liliopsida	Alismatales	Araceae	Lasia	Lasia spinosa	Sunny	Skiophyte	Moist	Hillside	Herb	0-5cm	118.6	Vegetative	Loamy	Brown	24.1	10.27	41.07	17.31	Botanical Garden	Botanical Garden	24.0684	97.8191	1068
B123	HD_RS23	Tracheophyta	Liliopsida	Alismatales	Araceae	Lasia	Lasia spinosa	Sunny	Skiophyte	Moist	Hillside	Herb	0-5cm	117.2	Vegetative	Loamy	Brown	24.1	10.27	41.07	17.31	Botanical Garden	Botanical Garden	24.0684	97.8191	1068
T297	CB_RS07	Tracheophyta	Liliopsida	Alismatales	Araceae	Pothos	Pothos chinensis	Sunny	Skiophyte	Moist	Reserve	Vine	5-10cm	45.7	Vegetative	Loamy	Brown	27.57	11.37	45.47	16.64	Moli Rainforest	Moli Rainforest	24.1148	97.9825	893
T297	CA_RS07	Tracheophyta	Liliopsida	Alismatales	Araceae	Pothos	Pothos chinensis	Sunny	Skiophyte	Moist	Reserve	Vine	5-10cm	53.7	Vegetative	Loamy	Brown	27.57	11.37	45.47	16.64	Moli Rainforest	Moli Rainforest	24.1148	97.9825	893
T297	KF_RS15	Tracheophyta	Liliopsida	Alismatales	Araceae	Pothos	Pothos chinensis	Sunny	Skiophyte	Moist	Reserve	Vine	5-10cm	84.5	Vegetative	Loamy	Brown	27.57	11.37	45.47	16.64	Moli Rainforest	Moli Rainforest	24.1148	97.9825	893
B077	XF_RS08	Tracheophyta	Liliopsida	Alismatales	Araceae	Pothos	Pothos scandens	Sunny	Heliophyte	Moist	Hillside	Vine	5-10cm	98	Vegetative	Loamy	Brown	40.07	15.33	61.33	22.2	Botanical Garden	Botanical Garden	24.0721	97.8164	1150
T021	ZI_RS19	Tracheophyta	Liliopsida	Alismatales	Araceae	Rhaphidophora	Rhaphidophora decursiva	Sunny	Skiophyte	Moist	Hillside	Vine	0-5cm	38.9	Vegetative	Loamy	Brown	41	15.63	62.53	21.95	Botanical Garden	Botanical Garden	24.0697	97.8174	1122
T021	ZI_RS20	Tracheophyta	Liliopsida	Alismatales	Araceae	Rhaphidophora	Rhaphidophora decursiva	Sunny	Skiophyte	Moist	Hillside	Vine	0-5cm	105.6	Vegetative	Loamy	Brown	41	15.63	62.53	21.95	Botanical Garden	Botanical Garden	24.0697	97.8174	1122
T021	ZI_RS21	Tracheophyta	Liliopsida	Alismatales	Araceae	Rhaphidophora	Rhaphidophora decursiva	Sunny	Skiophyte	Moist	Hillside	Vine	0-5cm	105.7	Vegetative	Loamy	Brown	41	15.63	62.53	21.95	Botanical Garden	Botanical Garden	24.0697	97.8174	1122
C012	KG_RS03	Tracheophyta	Liliopsida	Alismatales	Araceae	Rhaphidophora	Rhaphidophora megaphylla	Sunny	Skiophyte	Moist	Reserve	Vine	0-5cm	135.7	Vegetative	Loamy	Brown	29.67	12	48	17.23	Moli Rainforest	Moli Rainforest	24.1072	97.985	835
C012	KG_RS02	Tracheophyta	Liliopsida	Alismatales	Araceae	Rhaphidophora	Rhaphidophora megaphylla	Sunny	Skiophyte	Moist	Reserve	Vine	0-5cm	59.2	Vegetative	Loamy	Brown	29.67	12	48	17.23	Moli Rainforest	Moli Rainforest	24.1072	97.985	835
C012	KG_RS01	Tracheophyta	Liliopsida	Alismatales	Araceae	Rhaphidophora	Rhaphidophora megaphylla	Sunny	Skiophyte	Moist	Reserve	Vine	0-5cm	103.5	Vegetative	Loamy	Brown	29.67	12	48	17.23	Moli Rainforest	Moli Rainforest	24.1072	97.985	835
T307	ZH_RS16	Tracheophyta	Liliopsida	Alismatales	Araceae	Rhaphidophora	Rhaphidophora megaphylla	Sunny	Skiophyte	Moist	Reserve	Vine	0-5cm	35.9	Vegetative	Loamy	Brown	29.93	12.13	48.53	19.35	Moli Rainforest	Moli Rainforest	24.1159	97.9802	939
T307	ZH_RS17	Tracheophyta	Liliopsida	Alismatales	Araceae	Rhaphidophora	Rhaphidophora megaphylla	Sunny	Skiophyte	Moist	Reserve	Vine	0-5cm	70.6	Vegetative	Loamy	Brown	29.93	12.13	48.53	19.35	Moli Rainforest	Moli Rainforest	24.1159	97.9802	939
T307	ZH_RS18	Tracheophyta	Liliopsida	Alismatales	Araceae	Rhaphidophora	Rhaphidophora megaphylla	Sunny	Skiophyte	Moist	Reserve	Vine	0-5cm	25.9	Vegetative	Loamy	Brown	29.93	12.13	48.53	19.35	Moli Rainforest	Moli Rainforest	24.1159	97.9802	939
T239	FI_RS21	Tracheophyta	Liliopsida	Alismatales	Araceae	Syngonium	Syngonium podophyllum	Sunny	Skiophyte	Moist	Hillside	Herb	0-5cm	124.4	Vegetative	Loamy	Red	18.83	8.57	34.27	27.93	Botanical Garden	Botanical Garden	24.0699	97.8192	1110
T239	FI_RS17	Tracheophyta	Liliopsida	Alismatales	Araceae	Syngonium	Syngonium podophyllum	Sunny	Skiophyte	Moist	Hillside	Herb	0-5cm	108.1	Vegetative	Loamy	Red	18.83	8.57	34.27	27.93	Botanical Garden	Botanical Garden	24.0699	97.8192	1110
T239	KF_RS14	Tracheophyta	Liliopsida	Alismatales	Araceae	Syngonium	Syngonium podophyllum	Sunny	Skiophyte	Moist	Hillside	Herb	0-5cm	165.7	Vegetative	Loamy	Red	18.83	8.57	34.27	27.93	Botanical Garden	Botanical Garden	24.0699	97.8192	1110
T249	FK_RS06	Tracheophyta	Liliopsida	Alismatales	Araceae	Syngonium	Syngonium podophyllum	Sunny	Skiophyte	Moist	Reserve	Herb	0-5cm	37.6	Vegetative	Loamy	Brown	25	10.57	48.93	19.58	Moli Rainforest	Moli Rainforest	24.1088	97.9872	812
T249	FK_RS01	Tracheophyta	Liliopsida	Alismatales	Araceae	Syngonium	Syngonium podophyllum	Sunny	Skiophyte	Moist	Reserve	Herb	0-5cm	104.7	Vegetative	Loamy	Brown	25	10.57	48.93	19.58	Moli Rainforest	Moli Rainforest	24.1088	97.9872	812
T249	FK_RS04	Tracheophyta	Liliopsida	Alismatales	Araceae	Syngonium	Syngonium podophyllum	Sunny	Skiophyte	Moist	Reserve	Herb	0-5cm	61.1	Vegetative	Loamy	Brown	25	10.57	48.93	19.58	Moli Rainforest	Moli Rainforest	24.1088	97.9872	812
T099	ZE_RS11	Tracheophyta	Liliopsida	Alismatales	Araceae	Thaumatophyllum	Thaumatophyllum bipinnatifidum	Sunny	Skiophyte	Moist	Park	Herb	0-5cm	112	Vegetative	Loamy	Brown	27.37	11.3	45.2	22.68	City Park	Nanmao Lake	24.0091	97.8726	719
T099	LJ_RS19	Tracheophyta	Liliopsida	Alismatales	Araceae	Thaumatophyllum	Thaumatophyllum bipinnatifidum	Sunny	Skiophyte	Moist	Park	Herb	0-5cm	101.9	Vegetative	Loamy	Brown	27.37	11.3	45.2	22.68	City Park	Nanmao Lake	24.0091	97.8726	719
T099	LJ_RS17	Tracheophyta	Liliopsida	Alismatales	Araceae	Thaumatophyllum	Thaumatophyllum bipinnatifidum	Sunny	Skiophyte	Moist	Park	Herb	0-5cm	99.4	Vegetative	Loamy	Brown	27.37	11.3	45.2	22.68	City Park	Nanmao Lake	24.0091	97.8726	719
T375	ZD_RS03	Tracheophyta	Liliopsida	Alismatales	Araceae	Thaumatophyllum	Thaumatophyllum bipinnatifidum	Sunny	Skiophyte	Moist	Park	Herb	0-5cm	104.5	Vegetative	Loamy	Red	23.2	10	40	27.16	City Park	Longmo Lake	24.0036	97.8433	730
T375	ZD_RS01	Tracheophyta	Liliopsida	Alismatales	Araceae	Thaumatophyllum	Thaumatophyllum bipinnatifidum	Sunny	Skiophyte	Moist	Park	Herb	0-5cm	113.1	Vegetative	Loamy	Red	23.2	10	40	27.16	City Park	Longmo Lake	24.0036	97.8433	730
T375	ZD_RS02	Tracheophyta	Liliopsida	Alismatales	Araceae	Thaumatophyllum	Thaumatophyllum bipinnatifidum	Sunny	Skiophyte	Moist	Park	Herb	0-5cm	109.5	Vegetative	Loamy	Red	23.2	10	40	27.16	City Park	Longmo Lake	24.0036	97.8433	730
C029	XG_RS07	Tracheophyta	Magnoliopsida	Apiales	Araliaceae	Aralia	Aralia elata	Sunny	Skiophyte	Moist	Reserve	Shrub (>2m)	0-5cm	104.5	Vegetative	Loamy	Brown	31.7	12.67	50.67	21.27	Moli Rainforest	Moli Rainforest	24.1057	97.9825	838
C029	XG_RS09	Tracheophyta	Magnoliopsida	Apiales	Araliaceae	Aralia	Aralia elata	Sunny	Skiophyte	Moist	Reserve	Shrub (>2m)	0-5cm	106.1	Vegetative	Loamy	Brown	31.7	12.67	50.67	21.27	Moli Rainforest	Moli Rainforest	24.1057	97.9825	838
C029	XG_RS08	Tracheophyta	Magnoliopsida	Apiales	Araliaceae	Aralia	Aralia elata	Sunny	Skiophyte	Moist	Reserve	Shrub (>2m)	0-5cm	107.7	Vegetative	Loamy	Brown	31.7	12.67	50.67	21.27	Moli Rainforest	Moli Rainforest	24.1057	97.9825	838
T276	XI_RS12	Tracheophyta	Magnoliopsida	Apiales	Araliaceae	Brassaiopsis	Brassaiopsis angustifolia	Sunny	Skiophyte	Moist	Reserve	Shrub (<2m)	5-10cm	123.5	Vegetative	Loamy	Brown	28.1	11.57	46.27	19.68	Moli Rainforest	Moli Rainforest	24.1111	97.9851	837
T276	XI_RS13	Tracheophyta	Magnoliopsida	Apiales	Araliaceae	Brassaiopsis	Brassaiopsis angustifolia	Sunny	Skiophyte	Moist	Reserve	Shrub (<2m)	5-10cm	116.7	Vegetative	Loamy	Brown	28.1	11.57	46.27	19.68	Moli Rainforest	Moli Rainforest	24.1111	97.9851	837
T276	XI_RS14	Tracheophyta	Magnoliopsida	Apiales	Araliaceae	Brassaiopsis	Brassaiopsis angustifolia	Sunny	Skiophyte	Moist	Reserve	Shrub (<2m)	5-10cm	106.9	Vegetative	Loamy	Brown	28.1	11.57	46.27	19.68	Moli Rainforest	Moli Rainforest	24.1111	97.9851	837
B065	HD_RS06	Tracheophyta	Magnoliopsida	Apiales	Araliaceae	Brassaiopsis	Brassaiopsis dumicola	Sunny	Skiophyte	Moist	Hillside	Shrub (<2m)	0-5cm	36.7	Vegetative	Loamy	Brown	31.47	12.63	50.53	17.81	Botanical Garden	Botanical Garden	24.071	97.817	1130
T058	LP_RS13	Tracheophyta	Magnoliopsida	Apiales	Araliaceae	Brassaiopsis	Brassaiopsis dumicola	Sunny	Heliophyte	Moist	Nursery	Shrub (>2m)	10-15cm	99.6	Vegetative	Loamy	Brown	30.5	12.3	49.2	27.33	Wanding Town	Huihuan Village	24.1194	98.0467	739
T058	LP_RS12	Tracheophyta	Magnoliopsida	Apiales	Araliaceae	Brassaiopsis	Brassaiopsis dumicola	Sunny	Heliophyte	Moist	Nursery	Shrub (>2m)	10-15cm	75.4	Vegetative	Loamy	Brown	30.5	12.3	49.2	27.33	Wanding Town	Huihuan Village	24.1194	98.0467	739
T056	LP_RS10	Tracheophyta	Magnoliopsida	Apiales	Araliaceae	Brassaiopsis	Brassaiopsis hainla	Sunny	Heliophyte	Moist	Nursery	Tree (<10m)	10-15cm	101.1	Vegetative	Loamy	Brown	33.8	13.33	53.33	27.87	Wanding Town	Huihuan Village	24.1194	98.0467	739
T056	LP_RS09	Tracheophyta	Magnoliopsida	Apiales	Araliaceae	Brassaiopsis	Brassaiopsis hainla	Sunny	Heliophyte	Moist	Nursery	Tree (<10m)	10-15cm	84.1	Vegetative	Loamy	Brown	33.8	13.33	53.33	27.87	Wanding Town	Huihuan Village	24.1194	98.0467	739
E005	XC_RS15	Tracheophyta	Magnoliopsida	Apiales	Apiaceae	Centella	Centella asiatica	Shower	Skiophyte	Moist	Hillside	Herb	0-5cm	99.1	Vegetative	Loamy	Brown	21.73	9.5	38	19.16	Botanical Garden	Botanical Garden	24.0706	97.82	1073
T093	KH_RS18	Tracheophyta	Magnoliopsida	Apiales	Araliaceae	Eleutherococcus	Eleutherococcus senticosus	Sunny	Heliophyte	Moist	Hillside	Shrub (<2m)	5-10cm	100.9	Vegetative	Loamy	Brown	23.47	10.1	40.4	25.75	Botanical Garden	Botanical Garden	24.0697	97.8191	1116
T093	KH_RS16	Tracheophyta	Magnoliopsida	Apiales	Araliaceae	Eleutherococcus	Eleutherococcus senticosus	Sunny	Heliophyte	Moist	Hillside	Shrub (<2m)	5-10cm	46.7	Vegetative	Loamy	Brown	23.47	10.1	40.4	25.75	Botanical Garden	Botanical Garden	24.0697	97.8191	1116
T093	KH_RS17	Tracheophyta	Magnoliopsida	Apiales	Araliaceae	Eleutherococcus	Eleutherococcus senticosus	Sunny	Heliophyte	Moist	Hillside	Shrub (<2m)	5-10cm	48.9	Vegetative	Loamy	Brown	23.47	10.1	40.4	25.75	Botanical Garden	Botanical Garden	24.0697	97.8191	1116
D007	LU_RS08	Tracheophyta	Magnoliopsida	Apiales	Apiaceae	Eryngium	Eryngium foetidum	Sunny	Skiophyte	Moist	Hillside	Herb	0-5cm	109.3	Vegetative	Loamy	Brown	26.17	10.93	43.73	21.08	Botanical Garden	Botanical Garden	24.0685	97.8213	1094
B040	HE_RS07	Tracheophyta	Magnoliopsida	Apiales	Araliaceae	Heptapleurum	Heptapleurum ellipticum	Sunny	Skiophyte	Moist	Hillside	Shrub (<2m)	0-5cm	96.2	Vegetative	Loamy	Brown	40.17	15.37	61.47	18.33	Botanical Garden	Botanical Garden	24.0694	97.8185	1113
B040	HE_RS06	Tracheophyta	Magnoliopsida	Apiales	Araliaceae	Heptapleurum	Heptapleurum ellipticum	Sunny	Skiophyte	Moist	Hillside	Shrub (<2m)	0-5cm	93.4	Vegetative	Loamy	Brown	40.17	15.37	61.47	18.33	Botanical Garden	Botanical Garden	24.0694	97.8185	1113
B040	HE_RS08	Tracheophyta	Magnoliopsida	Apiales	Araliaceae	Heptapleurum	Heptapleurum ellipticum	Sunny	Skiophyte	Moist	Hillside	Shrub (<2m)	0-5cm	85.3	Vegetative	Loamy	Brown	40.17	15.37	61.47	18.33	Botanical Garden	Botanical Garden	24.0694	97.8185	1113
T216	XI_RS20	Tracheophyta	Magnoliopsida	Apiales	Araliaceae	Heptapleurum	Heptapleurum ellipticum	Sunny	Heliophyte	Moist	Park	Shrub (<2m)	5-10cm	99.7	Vegetative	Loamy	Brown	25.07	10.6	42.4	27.02	City Park	Nanmao Lake	24.0113	97.8725	730
B057	KC_RS07	Tracheophyta	Magnoliopsida	Apiales	Araliaceae	Heptapleurum	Heptapleurum heptaphyllum	Sunny	Heliophyte	Moist	Hillside	Tree (<10m)	5-10cm	91.4	Vegetative	Loamy	Brown	32	12.77	51.07	16.31	Botanical Garden	Botanical Garden	24.0708	97.8174	1112
B057	KC_RS16	Tracheophyta	Magnoliopsida	Apiales	Araliaceae	Heptapleurum	Heptapleurum heptaphyllum	Sunny	Heliophyte	Moist	Hillside	Tree (<10m)	5-10cm	186.7	Vegetative	Loamy	Brown	32	12.77	51.07	16.31	Botanical Garden	Botanical Garden	24.0708	97.8174	1112
B057	KC_RS12	Tracheophyta	Magnoliopsida	Apiales	Araliaceae	Heptapleurum	Heptapleurum heptaphyllum	Sunny	Heliophyte	Moist	Hillside	Tree (<10m)	5-10cm	103.2	Vegetative	Loamy	Brown	32	12.77	51.07	16.31	Botanical Garden	Botanical Garden	24.0708	97.8174	1112
E076	XD_RS07	Tracheophyta	Magnoliopsida	Apiales	Araliaceae	Heptapleurum	Heptapleurum heptaphyllum	Shower	Skiophyte	Moist	Hillside	Tree (<10m)	0-5cm	103.4	Vegetative	Loamy	Brown	36	14.07	56.27	15.2	Botanical Garden	Botanical Garden	24.0705	97.818	1111
T113	KJ_RS24	Tracheophyta	Magnoliopsida	Apiales	Araliaceae	Heteropanax	Heteropanax fragrans	Sunny	Heliophyte	Moist	Park	Tree (<10m)	5-10cm	321.1	Vegetative	Loamy	Brown	28.47	11.63	46.53	21.62	City Park	Nanmao Lake	24.0096	97.8705	733
E041	KA_RS10	Tracheophyta	Magnoliopsida	Apiales	Araliaceae	Hydrocotyle	Hydrocotyle nepalensis	Shower	Skiophyte	Moist	Hillside	Herb	0-5cm	106.4	Vegetative	Loamy	Brown	26.63	11.07	44.27	16.31	Botanical Garden	Botanical Garden	24.0702	97.8199	1094
T002	HB_RS21	Tracheophyta	Magnoliopsida	Apiales	Araliaceae	Schefflera	Schefflera shweliensis	Sunny	Skiophyte	Moist	Hillside	Shrub (<2m)	5-10cm	103.7	Vegetative	Loamy	Brown	30.9	12.43	49.73	25.58	Botanical Garden	Botanical Garden	24.0699	97.8194	1111
T002	HB_RS22	Tracheophyta	Magnoliopsida	Apiales	Araliaceae	Schefflera	Schefflera shweliensis	Sunny	Skiophyte	Moist	Hillside	Shrub (<2m)	5-10cm	102.9	Vegetative	Loamy	Brown	30.9	12.43	49.73	25.58	Botanical Garden	Botanical Garden	24.0699	97.8194	1111
T002	HB_RS18	Tracheophyta	Magnoliopsida	Apiales	Araliaceae	Schefflera	Schefflera shweliensis	Sunny	Skiophyte	Moist	Hillside	Shrub (<2m)	5-10cm	103.5	Vegetative	Loamy	Brown	30.9	12.43	49.73	25.58	Botanical Garden	Botanical Garden	24.0699	97.8194	1111
B138	ZF_RS24	Tracheophyta	Magnoliopsida	Aquifoliales	Stemonuraceae	Gomphandra	Gomphandra tetrandra	Sunny	Skiophyte	Moist	Hillside	Shrub (<2m)	0-5cm	128.1	Vegetative	Loamy	Brown	30.17	12.2	48.8	25.12	Botanical Garden	Botanical Garden	24.0686	97.821	1072
E077	XD_RS05	Tracheophyta	Magnoliopsida	Aquifoliales	Helwingiaceae	Helwingia	Helwingia himalaica	Shower	Skiophyte	Moist	Hillside	Shrub (<2m)	0-5cm	100.4	Vegetative	Loamy	Brown	32.13	12.8	51.2	15.64	Botanical Garden	Botanical Garden	24.0705	97.8179	1111
A070	FF_RS11	Tracheophyta	Magnoliopsida	Aquifoliales	Aquifoliaceae	Ilex	Ilex latifolia	Sunny	Heliophyte	Moist	Hillside	Tree (>10m)	5-10cm	107.1	Vegetative	Loamy	Brown	16.5	7.87	31.47	21.33	Botanical Garden	Botanical Garden	24.0693	97.8206	1111
T169	LF_RS10	Tracheophyta	Liliopsida	Arecales	Arecaceae	Archontophoenix	Archontophoenix alexandrae	Sunny	Heliophyte	Moist	Park	Tree (<10m)	5-10cm	100.6	Vegetative	Loamy	Brown	32.6	12.97	55.2	22.5	City Park	Nanmao Lake	24.0121	97.8708	731
T169	LF_RS09	Tracheophyta	Liliopsida	Arecales	Arecaceae	Archontophoenix	Archontophoenix alexandrae	Sunny	Heliophyte	Moist	Park	Tree (<10m)	5-10cm	105.3	Vegetative	Loamy	Brown	32.6	12.97	55.2	22.5	City Park	Nanmao Lake	24.0121	97.8708	731
T169	LF_RS11	Tracheophyta	Liliopsida	Arecales	Arecaceae	Archontophoenix	Archontophoenix alexandrae	Sunny	Heliophyte	Moist	Park	Tree (<10m)	5-10cm	101.5	Vegetative	Loamy	Brown	32.6	12.97	55.2	22.5	City Park	Nanmao Lake	24.0121	97.8708	731
T265	CC_RS22	Tracheophyta	Liliopsida	Arecales	Arecaceae	Archontophoenix	Archontophoenix alexandrae	Sunny	Heliophyte	Moist	Reserve	Tree (<10m)	5-10cm	87.1	Vegetative	Loamy	Brown					Moli Rainforest	Moli Rainforest	24.1101	97.9854	829
A029	HB_RS14	Tracheophyta	Liliopsida	Arecales	Arecaceae	Areca	Areca triandra	Sunny	Heliophyte	Moist	Hillside	Tree (<10m)	5-10cm	101.8	Vegetative	Loamy	Yellow	27	11.2	44.8	27.31	Botanical Garden	Botanical Garden	24.0697	97.8197	1118
A029	HB_RS12	Tracheophyta	Liliopsida	Arecales	Arecaceae	Areca	Areca triandra	Sunny	Heliophyte	Moist	Hillside	Tree (<10m)	5-10cm	107.3	Vegetative	Loamy	Yellow	27	11.2	44.8	27.31	Botanical Garden	Botanical Garden	24.0697	97.8197	1118
A029	HB_RS13	Tracheophyta	Liliopsida	Arecales	Arecaceae	Areca	Areca triandra	Sunny	Heliophyte	Moist	Hillside	Tree (<10m)	5-10cm	101.6	Vegetative	Loamy	Yellow	27	11.2	44.8	27.31	Botanical Garden	Botanical Garden	24.0697	97.8197	1118
T010	XB_RS22	Tracheophyta	Liliopsida	Arecales	Arecaceae	Calamus	Calamus erectus	Sunny	Heliophyte	Moist	Hillside	Tree (<10m)	5-10cm	105.5	Fruiting	Loamy	Brown	30.87	12.4	49.6	24.1	Botanical Garden	Botanical Garden	24.0691	97.8209	1110
T010	XB_RS23	Tracheophyta	Liliopsida	Arecales	Arecaceae	Calamus	Calamus erectus	Sunny	Heliophyte	Moist	Hillside	Tree (<10m)	5-10cm	104.5	Fruiting	Loamy	Brown	30.87	12.4	49.6	24.1	Botanical Garden	Botanical Garden	24.0691	97.8209	1110
T010	XB_RS24	Tracheophyta	Liliopsida	Arecales	Arecaceae	Calamus	Calamus erectus	Sunny	Heliophyte	Moist	Hillside	Tree (<10m)	5-10cm	131.3	Fruiting	Loamy	Brown	30.87	12.4	49.6	24.1	Botanical Garden	Botanical Garden	24.0691	97.8209	1110
T011	ZI_RS01	Tracheophyta	Liliopsida	Arecales	Arecaceae	Calamus	Calamus henryanus	Sunny	Heliophyte	Moist	Hillside	Tree (<10m)	10-15cm	119.2	Flowering	Loamy	Brown	32.2	12.8	51.2	24.39	Botanical Garden	Botanical Garden	24.0691	97.8209	1110
T011	ZI_RS02	Tracheophyta	Liliopsida	Arecales	Arecaceae	Calamus	Calamus henryanus	Sunny	Heliophyte	Moist	Hillside	Tree (<10m)	10-15cm	105.3	Flowering	Loamy	Brown	32.2	12.8	51.2	24.39	Botanical Garden	Botanical Garden	24.0691	97.8209	1110
T011	ZI_RS03	Tracheophyta	Liliopsida	Arecales	Arecaceae	Calamus	Calamus henryanus	Sunny	Heliophyte	Moist	Hillside	Tree (<10m)	10-15cm	101.9	Flowering	Loamy	Brown	32.2	12.8	51.2	24.39	Botanical Garden	Botanical Garden	24.0691	97.8209	1110
A006	LT_RS24	Tracheophyta	Liliopsida	Arecales	Arecaceae	Caryota	Caryota maxima	Sunny	Skiophyte	Moist	Hillside	Tree (<10m)	5-10cm	95.3	Vegetative	Loamy	Brown	32.3	12.87	51.47	25.14	Wanding Town	Huihuan River	24.1287	98.0516	738
A006	LT_RS23	Tracheophyta	Liliopsida	Arecales	Arecaceae	Caryota	Caryota maxima	Sunny	Skiophyte	Moist	Hillside	Tree (<10m)	5-10cm	133.9	Vegetative	Loamy	Brown	32.3	12.87	51.47	25.14	Wanding Town	Huihuan River	24.1287	98.0516	738
A006	LT_RS22	Tracheophyta	Liliopsida	Arecales	Arecaceae	Caryota	Caryota maxima	Sunny	Skiophyte	Moist	Hillside	Tree (<10m)	5-10cm	93	Vegetative	Loamy	Brown	32.3	12.87	51.47	25.14	Wanding Town	Huihuan River	24.1287	98.0516	738
F093	LH_RS10	Tracheophyta	Liliopsida	Arecales	Arecaceae	Caryota	Caryota maxima	Sunny	Heliophyte	Dry	Hillside	Tree (>10m)	10-15cm	103.5	Fruiting	Sandy	Red					Wanding Town	Wanding Forest Park	24.0906	98.0589	1046
T217	XI_RS22	Tracheophyta	Liliopsida	Arecales	Arecaceae	Caryota	Caryota mitis	Sunny	Heliophyte	Moist	Park	Tree (<10m)	5-10cm	103.8	Vegetative	Loamy	Brown	15.53	7.53	30.13	26.46	City Park	Nanmao Lake	24.0113	97.8725	730
T217	XI_RS23	Tracheophyta	Liliopsida	Arecales	Arecaceae	Caryota	Caryota mitis	Sunny	Heliophyte	Moist	Park	Tree (<10m)	5-10cm	102	Vegetative	Loamy	Brown	15.53	7.53	30.13	26.46	City Park	Nanmao Lake	24.0113	97.8725	730
T217	XI_RS21	Tracheophyta	Liliopsida	Arecales	Arecaceae	Caryota	Caryota mitis	Sunny	Heliophyte	Moist	Park	Tree (<10m)	5-10cm	102.2	Vegetative	Loamy	Brown	15.53	7.53	30.13	26.46	City Park	Nanmao Lake	24.0113	97.8725	730
T004	LR_RS23	Tracheophyta	Liliopsida	Arecales	Arecaceae	Caryota	Caryota obtusa	Sunny	Heliophyte	Moist	Hillside	Tree (<10m)	10-15cm	100.9	Vegetative	Loamy	Brown	32.83	13.03	52.13	26.23	Botanical Garden	Botanical Garden	24.0693	97.82	1111
T004	LR_RS24	Tracheophyta	Liliopsida	Arecales	Arecaceae	Caryota	Caryota obtusa	Sunny	Heliophyte	Moist	Hillside	Tree (<10m)	10-15cm	107.7	Vegetative	Loamy	Brown	32.83	13.03	52.13	26.23	Botanical Garden	Botanical Garden	24.0693	97.82	1111
T004	LR_RS22	Tracheophyta	Liliopsida	Arecales	Arecaceae	Caryota	Caryota obtusa	Sunny	Heliophyte	Moist	Hillside	Tree (<10m)	10-15cm	103.6	Vegetative	Loamy	Brown	32.83	13.03	52.13	26.23	Botanical Garden	Botanical Garden	24.0693	97.82	1111
T408	ZC_RS19	Tracheophyta	Liliopsida	Arecales	Arecaceae	Corypha	Corypha umbraculifera	Sunny	Heliophyte	Moist	Park	Tree (<10m)	0-5cm	69.8	Vegetative	Loamy	Brown	26.77	11.13	44.53	27.95	City Park	Longmo Lake	24.0014	97.8355	730
T180	LF_RS18	Tracheophyta	Liliopsida	Arecales	Arecaceae	Dypsis	Dypsis decaryi	Sunny	Heliophyte	Moist	Park	Tree (<10m)	5-10cm	100.2	Flowering	Loamy	Brown	39.1	15.03	60.13	25.1	City Park	Nanmao Lake	24.0107	97.8697	726
T180	LF_RS17	Tracheophyta	Liliopsida	Arecales	Arecaceae	Dypsis	Dypsis decaryi	Sunny	Heliophyte	Moist	Park	Tree (<10m)	5-10cm	103.9	Flowering	Loamy	Brown	39.1	15.03	60.13	25.1	City Park	Nanmao Lake	24.0107	97.8697	726
T180	LF_RS16	Tracheophyta	Liliopsida	Arecales	Arecaceae	Dypsis	Dypsis decaryi	Sunny	Heliophyte	Moist	Park	Tree (<10m)	5-10cm	103.4	Flowering	Loamy	Brown	39.1	15.03	60.13	25.1	City Park	Nanmao Lake	24.0107	97.8697	726
T171	LG_RS23	Tracheophyta	Liliopsida	Arecales	Arecaceae	Dypsis	Dypsis lastelliana	Sunny	Heliophyte	Moist	Park	Tree (<10m)	5-10cm	103	Flowering	Loamy	Brown	36.53	14.23	56.93	25.37	City Park	Nanmao Lake	24.0111	97.8701	721
T171	LG_RS21	Tracheophyta	Liliopsida	Arecales	Arecaceae	Dypsis	Dypsis lastelliana	Sunny	Heliophyte	Moist	Park	Tree (<10m)	5-10cm	102.9	Flowering	Loamy	Brown	36.53	14.23	56.93	25.37	City Park	Nanmao Lake	24.0111	97.8701	721
T171	LG_RS22	Tracheophyta	Liliopsida	Arecales	Arecaceae	Dypsis	Dypsis lastelliana	Sunny	Heliophyte	Moist	Park	Tree (<10m)	5-10cm	101.2	Flowering	Loamy	Brown	36.53	14.23	56.93	25.37	City Park	Nanmao Lake	24.0111	97.8701	721
T184	LF_RS24	Tracheophyta	Liliopsida	Arecales	Arecaceae	Dypsis	Dypsis lutescens	Sunny	Heliophyte	Moist	Park	Shrub (<2m)	0-5cm	100.8	Vegetative	Loamy	Brown	48.83	18.1	72.4	27.1	City Park	Nanmao Lake	24.0097	97.8678	731
T269	FI_RS19	Tracheophyta	Liliopsida	Arecales	Arecaceae	Dypsis	Dypsis lutescens	Sunny	Heliophyte	Moist	Reserve	Shrub (>2m)	0-5cm	99.1	Vegetative	Loamy	Brown	21.7	9.5	38	20.83	Moli Rainforest	Moli Rainforest	24.1101	97.9859	834
T269	FI_RS16	Tracheophyta	Liliopsida	Arecales	Arecaceae	Dypsis	Dypsis lutescens	Sunny	Heliophyte	Moist	Reserve	Shrub (>2m)	0-5cm	100.9	Vegetative	Loamy	Brown	21.7	9.5	38	20.83	Moli Rainforest	Moli Rainforest	24.1101	97.9859	834
T269	FI_RS15	Tracheophyta	Liliopsida	Arecales	Arecaceae	Dypsis	Dypsis lutescens	Sunny	Heliophyte	Moist	Reserve	Shrub (>2m)	0-5cm	99.8	Vegetative	Loamy	Brown	21.7	9.5	38	20.83	Moli Rainforest	Moli Rainforest	24.1101	97.9859	834
T196	XJ_RS07	Tracheophyta	Liliopsida	Arecales	Arecaceae	Livistona	Livistona chinensis	Shower	Skiophyte	Moist	Park	Tree (<10m)	0-5cm	115.8	Vegetative	Loamy	Red	34.1	13.47	53.87	25.5	City Park	Nanmao Lake	24.0123	97.8697	718
T196	XJ_RS08	Tracheophyta	Liliopsida	Arecales	Arecaceae	Livistona	Livistona chinensis	Shower	Skiophyte	Moist	Park	Tree (<10m)	0-5cm	114.1	Vegetative	Loamy	Red	34.1	13.47	53.87	25.5	City Park	Nanmao Lake	24.0123	97.8697	718
T196	XJ_RS09	Tracheophyta	Liliopsida	Arecales	Arecaceae	Livistona	Livistona chinensis	Shower	Skiophyte	Moist	Park	Tree (<10m)	0-5cm	105.5	Vegetative	Loamy	Red	34.1	13.47	53.87	25.5	City Park	Nanmao Lake	24.0123	97.8697	718
T314	FB_RS22	Tracheophyta	Liliopsida	Arecales	Arecaceae	Livistona	Livistona chinensis	Sunny	Heliophyte	Moist	Reserve	Tree (<10m)	5-10cm	107.1	Vegetative	Loamy	Brown					Moli Rainforest	Moli Rainforest	24.1113	97.9861	830
T314	FB_RS18	Tracheophyta	Liliopsida	Arecales	Arecaceae	Livistona	Livistona chinensis	Sunny	Heliophyte	Moist	Reserve	Tree (<10m)	5-10cm	102.7	Vegetative	Loamy	Brown					Moli Rainforest	Moli Rainforest	24.1113	97.9861	830
T314	FB_RS23	Tracheophyta	Liliopsida	Arecales	Arecaceae	Livistona	Livistona chinensis	Sunny	Heliophyte	Moist	Reserve	Tree (<10m)	5-10cm	103.9	Vegetative	Loamy	Brown					Moli Rainforest	Moli Rainforest	24.1113	97.9861	830
T371	LC_RS24	Tracheophyta	Liliopsida	Arecales	Arecaceae	Livistona	Livistona chinensis	Sunny	Heliophyte	Moist	Park	Tree (<10m)	5-10cm	107.2	Vegetative	Loamy	Red	36.83	14.3	57.2	22.45	City Park	Longmo Lake	23.9988	97.8394	730
T173	LG_RS03	Tracheophyta	Liliopsida	Arecales	Arecaceae	Phoenix	Phoenix roebelenii	Sunny	Heliophyte	Moist	Park	Shrub (>2m)	0-5cm	101.3	Flowering	Loamy	Brown	24.5	10.37	41.47	28.27	City Park	Nanmao Lake	24.011	97.8702	726
T173	LG_RS08	Tracheophyta	Liliopsida	Arecales	Arecaceae	Phoenix	Phoenix roebelenii	Sunny	Heliophyte	Moist	Park	Shrub (>2m)	0-5cm	100.7	Flowering	Loamy	Brown	24.5	10.37	41.47	28.27	City Park	Nanmao Lake	24.011	97.8702	726
T173	LG_RS07	Tracheophyta	Liliopsida	Arecales	Arecaceae	Phoenix	Phoenix roebelenii	Sunny	Heliophyte	Moist	Park	Shrub (>2m)	0-5cm	102.1	Flowering	Loamy	Brown	24.5	10.37	41.47	28.27	City Park	Nanmao Lake	24.011	97.8702	726
T356	LD_RS11	Tracheophyta	Liliopsida	Arecales	Arecaceae	Phoenix	Phoenix roebelenii	Sunny	Skiophyte	Moist	Park	Shrub (<2m)	0-5cm	103.7	Fruiting	Loamy	Red					City Park	Longmo Lake	24.003	97.8422	730
T356	LD_RS13	Tracheophyta	Liliopsida	Arecales	Arecaceae	Phoenix	Phoenix roebelenii	Sunny	Skiophyte	Moist	Park	Shrub (<2m)	0-5cm	98.5	Fruiting	Loamy	Red					City Park	Longmo Lake	24.003	97.8422	730
T356	LD_RS12	Tracheophyta	Liliopsida	Arecales	Arecaceae	Phoenix	Phoenix roebelenii	Sunny	Skiophyte	Moist	Park	Shrub (<2m)	0-5cm	109.1	Fruiting	Loamy	Red					City Park	Longmo Lake	24.003	97.8422	730
C062	FC_RS21	Tracheophyta	Liliopsida	Arecales	Arecaceae	Pinanga	Pinanga sylvestris	Sunny	Skiophyte	Moist	Reserve	Shrub (<2m)	0-5cm	112.6	Vegetative	Loamy	Brown	30.33	12.23	48.93	16.79	Moli Rainforest	Moli Rainforest	24.1161	97.98	957
T103	LJ_RS20	Tracheophyta	Liliopsida	Arecales	Arecaceae	Rhapis	Rhapis excelsa	Sunny	Skiophyte	Moist	Park	Shrub (<2m)	0-5cm	98	Vegetative	Loamy	Brown	31.73	12.67	52.33	23.83	City Park	Nanmao Lake	24.0094	97.8704	719
T103	ZE_RS17	Tracheophyta	Liliopsida	Arecales	Arecaceae	Rhapis	Rhapis excelsa	Sunny	Skiophyte	Moist	Park	Shrub (<2m)	0-5cm	114.5	Vegetative	Loamy	Brown	31.73	12.67	52.33	23.83	City Park	Nanmao Lake	24.0094	97.8704	719
T103	ZE_RS16	Tracheophyta	Liliopsida	Arecales	Arecaceae	Rhapis	Rhapis excelsa	Sunny	Skiophyte	Moist	Park	Shrub (<2m)	0-5cm	128.1	Vegetative	Loamy	Brown	31.73	12.67	52.33	23.83	City Park	Nanmao Lake	24.0094	97.8704	719
E053	XD_RS02	Tracheophyta	Liliopsida	Arecales	Arecaceae	Roystonea	Roystonea regia	Shower	Heliophyte	Moist	Hillside	Tree (<10m)	0-5cm	101.2	Vegetative	Loamy	Brown	28.2	11.3	46.27	14.29	Botanical Garden	Botanical Garden	24.0699	97.8191	1122
T005	HB_RS20	Tracheophyta	Liliopsida	Arecales	Arecaceae	Wallichia	Wallichia caryotoides	Sunny	Heliophyte	Moist	Hillside		5-10cm	102.2	Vegetative	Loamy	Brown	33.63	13.3	53.77	27.41	Botanical Garden	Botanical Garden	24.0693	97.8206	1111
T013	ZI_RS04	Tracheophyta	Liliopsida	Arecales	Arecaceae	Wallichia	Wallichia caryotoides	Sunny	Heliophyte	Moist	Hillside	Tree (<10m)	5-10cm	109.8	Vegetative	Loamy	Brown	19.77	8.9	35.63	23.75	Botanical Garden	Botanical Garden	24.0691	97.821	1110
T013	ZI_RS05	Tracheophyta	Liliopsida	Arecales	Arecaceae	Wallichia	Wallichia caryotoides	Sunny	Heliophyte	Moist	Hillside	Tree (<10m)	5-10cm	103.7	Vegetative	Loamy	Brown	19.77	8.9	35.63	23.75	Botanical Garden	Botanical Garden	24.0691	97.821	1110
T013	ZI_RS06	Tracheophyta	Liliopsida	Arecales	Arecaceae	Wallichia	Wallichia caryotoides	Sunny	Heliophyte	Moist	Hillside	Tree (<10m)	5-10cm	104.1	Vegetative	Loamy	Brown	19.77	8.9	35.63	23.75	Botanical Garden	Botanical Garden	24.0691	97.821	1110
B104	HC_RS01	Tracheophyta	Liliopsida	Arecales	Arecaceae	Wallichia	Wallichia disticha	Sunny	Skiophyte	Moist	Hillside	Tree (<10m)	0-5cm	99.1	Vegetative	Loamy	Brown	38.67	14.87	59.47	17.45	Botanical Garden	Botanical Garden	24.0699	97.8175	1104
B104	HC_RS04	Tracheophyta	Liliopsida	Arecales	Arecaceae	Wallichia	Wallichia disticha	Sunny	Skiophyte	Moist	Hillside	Tree (<10m)	0-5cm	105	Vegetative	Loamy	Brown	38.67	14.87	59.47	17.45	Botanical Garden	Botanical Garden	24.0699	97.8175	1104
B104	HD_RS20	Tracheophyta	Liliopsida	Arecales	Arecaceae	Wallichia	Wallichia disticha	Sunny	Skiophyte	Moist	Hillside	Tree (<10m)	0-5cm	112.9	Vegetative	Loamy	Brown	38.67	14.87	59.47	17.45	Botanical Garden	Botanical Garden	24.0699	97.8175	1104
T336	ZB_RS04	Tracheophyta	Liliopsida	Asparagales	Asparagaceae	Agave	Agave sisalana	Sunny	Heliophyte	Moist	Park	Herb	5-10cm	128.6	Vegetative	Loamy	Red					City Park	Longmo Lake	24.0023	97.8427	730
B105	HC_RS03	Tracheophyta	Liliopsida	Asparagales	Asparagaceae	Aspidistra	Aspidistra elatior	Sunny	Skiophyte	Moist	Hillside	Herb	0-5cm	104	Flowering	Loamy	Brown	34.07	13.43	53.73	17.88	Botanical Garden	Botanical Garden	24.07	97.8175	1106
B105	HC_RS08	Tracheophyta	Liliopsida	Asparagales	Asparagaceae	Aspidistra	Aspidistra elatior	Sunny	Skiophyte	Moist	Hillside	Herb	0-5cm	100.7	Flowering	Loamy	Brown	34.07	13.43	53.73	17.88	Botanical Garden	Botanical Garden	24.07	97.8175	1106
B105	HC_RS02	Tracheophyta	Liliopsida	Asparagales	Asparagaceae	Aspidistra	Aspidistra elatior	Sunny	Skiophyte	Moist	Hillside	Herb	0-5cm	102.2	Flowering	Loamy	Brown	34.07	13.43	53.73	17.88	Botanical Garden	Botanical Garden	24.07	97.8175	1106
T202	KF_RS08	Tracheophyta	Liliopsida	Asparagales	Asparagaceae	Cordyline	Cordyline fruticosa	Shower	Heliophyte	Moist	Park	Shrub (<2m)	5-10cm	233.5	Vegetative	Loamy	Brown	26.2	10.93	43.73	25.98	City Park	Nanmao Lake	24.0115	97.8723	736
T202	KF_RS06	Tracheophyta	Liliopsida	Asparagales	Asparagaceae	Cordyline	Cordyline fruticosa	Shower	Heliophyte	Moist	Park	Shrub (<2m)	5-10cm	106.8	Vegetative	Loamy	Brown	26.2	10.93	43.73	25.98	City Park	Nanmao Lake	24.0115	97.8723	736
T202	KF_RS07	Tracheophyta	Liliopsida	Asparagales	Asparagaceae	Cordyline	Cordyline fruticosa	Shower	Heliophyte	Moist	Park	Shrub (<2m)	5-10cm	278.7	Vegetative	Loamy	Brown	26.2	10.93	43.73	25.98	City Park	Nanmao Lake	24.0115	97.8723	736
T379	LE_RS01	Tracheophyta	Liliopsida	Asparagales	Asparagaceae	Cordyline	Cordyline fruticosa	Sunny	Skiophyte	Moist	Park	Shrub (<2m)	0-5cm	102.1	Vegetative	Loamy	Red	20.53	9.13	36.53	28.31	City Park	Longmo Lake	24.0035	97.8434	730
T379	LE_RS02	Tracheophyta	Liliopsida	Asparagales	Asparagaceae	Cordyline	Cordyline fruticosa	Sunny	Skiophyte	Moist	Park	Shrub (<2m)	0-5cm	103.7	Vegetative	Loamy	Red	20.53	9.13	36.53	28.31	City Park	Longmo Lake	24.0035	97.8434	730
T379	LE_RS03	Tracheophyta	Liliopsida	Asparagales	Asparagaceae	Cordyline	Cordyline fruticosa	Sunny	Skiophyte	Moist	Park	Shrub (<2m)	0-5cm	101.1	Vegetative	Loamy	Red	20.53	9.13	36.53	28.31	City Park	Longmo Lake	24.0035	97.8434	730
T139	FG_RS07	Tracheophyta	Liliopsida	Asparagales	Amaryllidaceae	Crinum	Crinum latifolium	Sunny	Skiophyte	Moist	Park	Herb	0-5cm	102.6	Flowering	Loamy	Brown	29.93	12.13	48.53	20.77	City Park	Nanmao Lake	24.0102	97.8728	724
T139	FG_RS02	Tracheophyta	Liliopsida	Asparagales	Amaryllidaceae	Crinum	Crinum latifolium	Sunny	Skiophyte	Moist	Park	Herb	0-5cm	108.6	Flowering	Loamy	Brown	29.93	12.13	48.53	20.77	City Park	Nanmao Lake	24.0102	97.8728	724
T139	FG_RS04	Tracheophyta	Liliopsida	Asparagales	Amaryllidaceae	Crinum	Crinum latifolium	Sunny	Skiophyte	Moist	Park	Herb	0-5cm	96.3	Flowering	Loamy	Brown	29.93	12.13	48.53	20.77	City Park	Nanmao Lake	24.0102	97.8728	724
T410	ZC_RS23	Tracheophyta	Liliopsida	Asparagales	Iridaceae	Crocosmia	Crocosmia crocosmiiflora	Sunny	Heliophyte	Moist	Park	Herb	0-5cm	139.1	Flowering	Loamy	Red	36.83	14.3	57.2	25.43	City Park	Longmo Lake	24.0012	97.8353	730
A049	FH_RS18	Tracheophyta	Liliopsida	Asparagales	Hypoxidaceae	Curculigo	Curculigo capitulata	Sunny	Skiophyte	Moist	Hillside	Herb	5-10cm	104.9	Vegetative	Loamy	Brown	27.3	11.3	45.2	22	Botanical Garden	Botanical Garden	24.0716	97.8177	1133
A049	FH_RS19	Tracheophyta	Liliopsida	Asparagales	Hypoxidaceae	Curculigo	Curculigo capitulata	Sunny	Skiophyte	Moist	Hillside	Herb	5-10cm	124.5	Vegetative	Loamy	Brown	27.3	11.3	45.2	22	Botanical Garden	Botanical Garden	24.0716	97.8177	1133
A049	FI_RS18	Tracheophyta	Liliopsida	Asparagales	Hypoxidaceae	Curculigo	Curculigo capitulata	Sunny	Skiophyte	Moist	Hillside	Herb	5-10cm	116.3	Vegetative	Loamy	Brown	27.3	11.3	45.2	22	Botanical Garden	Botanical Garden	24.0716	97.8177	1133
T277	XI_RS15	Tracheophyta	Liliopsida	Asparagales	Hypoxidaceae	Curculigo	Curculigo capitulata	Sunny	Skiophyte	Moist	Reserve	Herb	0-5cm	100.7	Vegetative	Loamy	Brown	20.47	9.1	36.4	19.41	Moli Rainforest	Moli Rainforest	24.1115	97.9848	840
T277	XI_RS16	Tracheophyta	Liliopsida	Asparagales	Hypoxidaceae	Curculigo	Curculigo capitulata	Sunny	Skiophyte	Moist	Reserve	Herb	0-5cm	100.6	Vegetative	Loamy	Brown	20.47	9.1	36.4	19.41	Moli Rainforest	Moli Rainforest	24.1115	97.9848	840
T277	CD_RS11	Tracheophyta	Liliopsida	Asparagales	Hypoxidaceae	Curculigo	Curculigo capitulata	Sunny	Skiophyte	Moist	Reserve	Herb	0-5cm	76.4	Vegetative	Loamy	Brown	20.47	9.1	36.4	19.41	Moli Rainforest	Moli Rainforest	24.1115	97.9848	840
C064	FC_RS09	Tracheophyta	Liliopsida	Asparagales	Orchidaceae	Cymbidium	Cymbidium lowianum	Sunny	Heliophyte	Moist	Reserve	Herb	0-5cm	38.6	Flowering	Loamy	Brown	32.03	12.8	51.2	18.02	Moli Rainforest	Moli Rainforest	24.1158	97.981	957
C064	FC_RS08	Tracheophyta	Liliopsida	Asparagales	Orchidaceae	Cymbidium	Cymbidium lowianum	Sunny	Heliophyte	Moist	Reserve	Herb	0-5cm	86.8	Flowering	Loamy	Brown	32.03	12.8	51.2	18.02	Moli Rainforest	Moli Rainforest	24.1158	97.981	957
C064	FC_RS10	Tracheophyta	Liliopsida	Asparagales	Orchidaceae	Cymbidium	Cymbidium lowianum	Sunny	Heliophyte	Moist	Reserve	Herb	0-5cm	100	Flowering	Loamy	Brown	32.03	12.8	51.2	18.02	Moli Rainforest	Moli Rainforest	24.1158	97.981	957
B083	XF_RS17	Tracheophyta	Liliopsida	Asparagales	Asphodelaceae	Dianella	Dianella ensifolia	Sunny	Skiophyte	Moist	Hillside	Herb	0-5cm	109.6	Fruiting	Loamy	Brown	33.97	13.4	53.6	21.54	Botanical Garden	Botanical Garden	24.072	97.8173	1145
B025	KD_RS18	Tracheophyta	Liliopsida	Asparagales	Asparagaceae	Dracaena	Dracaena cambodiana	Sunny	Skiophyte	Moist	Hillside	Tree (<10m)	5-10cm	193.9	Vegetative	Loamy	Brown	36.57	14.23	56.93	21.64	Botanical Garden	Botanical Garden	24.0694	97.8194	1116
B025	KD_RS21	Tracheophyta	Liliopsida	Asparagales	Asparagaceae	Dracaena	Dracaena cambodiana	Sunny	Skiophyte	Moist	Hillside	Tree (<10m)	5-10cm	30.7	Vegetative	Loamy	Brown	36.57	14.23	56.93	21.64	Botanical Garden	Botanical Garden	24.0694	97.8194	1116
B025	KD_RS15	Tracheophyta	Liliopsida	Asparagales	Asparagaceae	Dracaena	Dracaena cambodiana	Sunny	Skiophyte	Moist	Hillside	Tree (<10m)	5-10cm	105.2	Vegetative	Loamy	Brown	36.57	14.23	56.93	21.64	Botanical Garden	Botanical Garden	24.0694	97.8194	1116
B113	HC_RS14	Tracheophyta	Liliopsida	Asparagales	Asparagaceae	Dracaena	Dracaena cambodiana	Sunny	Skiophyte	Moist	Hillside	Tree (<10m)	5-10cm	100.3	Vegetative	Loamy	Brown	33.9	13.37	53.47	17.93	Botanical Garden	Botanical Garden	24.0693	97.8178	1117
E049	XC_RS10	Tracheophyta	Liliopsida	Asparagales	Asparagaceae	Dracaena	Dracaena cochinchinensis	Shower	Heliophyte	Moist	Hillside	Tree (<10m)	0-5cm	102.4	Vegetative	Loamy	Brown	31.93	12.77	51.07	14.56	Botanical Garden	Botanical Garden	24.0698	97.8193	1120
T108	LK_RS15	Tracheophyta	Liliopsida	Asparagales	Asparagaceae	Dracaena	Dracaena draco	Sunny	Heliophyte	Moist	Park	Tree (<10m)	5-10cm	105.4	Vegetative	Loamy	Brown	18.77	8.6	34.4	18.31	City Park	Nanmao Lake	24.0095	97.8707	733
T108	LK_RS14	Tracheophyta	Liliopsida	Asparagales	Asparagaceae	Dracaena	Dracaena draco	Sunny	Heliophyte	Moist	Park	Tree (<10m)	5-10cm	101.9	Vegetative	Loamy	Brown	18.77	8.6	34.4	18.31	City Park	Nanmao Lake	24.0095	97.8707	733
T108	KJ_RS20	Tracheophyta	Liliopsida	Asparagales	Asparagaceae	Dracaena	Dracaena draco	Sunny	Heliophyte	Moist	Park	Tree (<10m)	5-10cm	85.1	Vegetative	Loamy	Brown	18.77	8.6	34.4	18.31	City Park	Nanmao Lake	24.0095	97.8707	733
T204	KF_RS17	Tracheophyta	Liliopsida	Asparagales	Asparagaceae	Dracaena	Dracaena draco	Shower	Heliophyte	Moist	Park	Tree (<10m)	5-10cm	101.8	Vegetative	Loamy	Brown	37.03	14.37	57.47	25.21	City Park	Nanmao Lake	24.0115	97.8722	730
T204	KF_RS20	Tracheophyta	Liliopsida	Asparagales	Asparagaceae	Dracaena	Dracaena draco	Shower	Heliophyte	Moist	Park	Tree (<10m)	5-10cm	132.5	Vegetative	Loamy	Brown	37.03	14.37	57.47	25.21	City Park	Nanmao Lake	24.0115	97.8722	730
T204	KF_RS11	Tracheophyta	Liliopsida	Asparagales	Asparagaceae	Dracaena	Dracaena draco	Shower	Heliophyte	Moist	Park	Tree (<10m)	5-10cm	118.7	Vegetative	Loamy	Brown	37.03	14.37	57.47	25.21	City Park	Nanmao Lake	24.0115	97.8722	730
B114	HC_RS09	Tracheophyta	Liliopsida	Asparagales	Asparagaceae	Dracaena	Dracaena fragrans	Sunny	Skiophyte	Moist	Hillside	Tree (<10m)	5-10cm	99.7	Vegetative	Loamy	Brown	38.17	14.73	58.93	18.89	Botanical Garden	Botanical Garden	24.0693	97.8178	1117
B114	HC_RS24	Tracheophyta	Liliopsida	Asparagales	Asparagaceae	Dracaena	Dracaena fragrans	Sunny	Skiophyte	Moist	Hillside	Tree (<10m)	5-10cm	102.1	Vegetative	Loamy	Brown	38.17	14.73	58.93	18.89	Botanical Garden	Botanical Garden	24.0693	97.8178	1117
B114	HC_RS23	Tracheophyta	Liliopsida	Asparagales	Asparagaceae	Dracaena	Dracaena fragrans	Sunny	Skiophyte	Moist	Hillside	Tree (<10m)	5-10cm	99.1	Vegetative	Loamy	Brown	38.17	14.73	58.93	18.89	Botanical Garden	Botanical Garden	24.0693	97.8178	1117
T228	FB_RS08	Tracheophyta	Liliopsida	Asparagales	Asparagaceae	Dracaena	Dracaena fragrans	Sunny	Heliophyte	Moist	Park	Tree (<10m)	5-10cm	100.4	Vegetative	Loamy	Brown	24	10.23	40.9	30.29	City Park	Nanmao Lake	24.0116	97.8714	742
T228	FB_RS07	Tracheophyta	Liliopsida	Asparagales	Asparagaceae	Dracaena	Dracaena fragrans	Sunny	Heliophyte	Moist	Park	Tree (<10m)	5-10cm	114.4	Vegetative	Loamy	Brown	24	10.23	40.9	30.29	City Park	Nanmao Lake	24.0116	97.8714	742
T228	FB_RS09	Tracheophyta	Liliopsida	Asparagales	Asparagaceae	Dracaena	Dracaena fragrans	Sunny	Heliophyte	Moist	Park	Tree (<10m)	5-10cm	104.1	Vegetative	Loamy	Brown	24	10.23	40.9	30.29	City Park	Nanmao Lake	24.0116	97.8714	742
T258	FI_RS08	Tracheophyta	Liliopsida	Asparagales	Asparagaceae	Dracaena	Dracaena fragrans	Sunny	Heliophyte	Moist	Reserve	Tree (<10m)	5-10cm	68.1	Vegetative	Loamy	Brown	35.73	13.97	55.87	20.87	Moli Rainforest	Moli Rainforest	24.1102	97.9858	813
T258	FI_RS13	Tracheophyta	Liliopsida	Asparagales	Asparagaceae	Dracaena	Dracaena fragrans	Sunny	Heliophyte	Moist	Reserve	Tree (<10m)	5-10cm	65.9	Vegetative	Loamy	Brown	35.73	13.97	55.87	20.87	Moli Rainforest	Moli Rainforest	24.1102	97.9858	813
T258	FI_RS14	Tracheophyta	Liliopsida	Asparagales	Asparagaceae	Dracaena	Dracaena fragrans	Sunny	Heliophyte	Moist	Reserve	Tree (<10m)	5-10cm	48.5	Vegetative	Loamy	Brown	35.73	13.97	55.87	20.87	Moli Rainforest	Moli Rainforest	24.1102	97.9858	813
B115	HC_RS22	Tracheophyta	Liliopsida	Asparagales	Asparagaceae	Dracaena	Dracaena terniflora	Sunny	Skiophyte	Moist	Hillside	Tree (<10m)	5-10cm	98.2	Vegetative	Loamy	Brown	40.03	15.3	61.2	19.25	Botanical Garden	Botanical Garden	24.0693	97.8178	1117
T130	LG_RS14	Tracheophyta	Liliopsida	Asparagales	Asparagaceae	Dracaena	Dracaena trifasciata	Sunny	Skiophyte	Moist	Park	Herb	0-5cm	101.3	Vegetative	Loamy	Brown					City Park	Nanmao Lake	24.0094	97.871	730
T130	LG_RS16	Tracheophyta	Liliopsida	Asparagales	Asparagaceae	Dracaena	Dracaena trifasciata	Sunny	Skiophyte	Moist	Park	Herb	0-5cm	100.6	Vegetative	Loamy	Brown					City Park	Nanmao Lake	24.0094	97.871	730
T130	LG_RS06	Tracheophyta	Liliopsida	Asparagales	Asparagaceae	Dracaena	Dracaena trifasciata	Sunny	Skiophyte	Moist	Park	Herb	0-5cm	102.3	Vegetative	Loamy	Brown					City Park	Nanmao Lake	24.0094	97.871	730
T255	FI_RS01	Tracheophyta	Liliopsida	Asparagales	Asparagaceae	Dracaena	Dracaena trifasciata	Sunny	Skiophyte	Moist	Reserve	Herb	0-5cm	79.8	Vegetative	Loamy	Brown	36.57	14.2	56.8	21.64	Moli Rainforest	Moli Rainforest	24.1091	97.9868	813
T386	ZC_RS07	Tracheophyta	Liliopsida	Asparagales	Asparagaceae	Dracaena	Dracaena unassigned	Sunny	Skiophyte	Moist	Park	Tree (<10m)	5-10cm	93.1	Vegetative	Loamy	Red	29.77	12.03	48.13	28.1	City Park	Longmo Lake	24.0022	97.8434	730
T386	ZC_RS05	Tracheophyta	Liliopsida	Asparagales	Asparagaceae	Dracaena	Dracaena unassigned	Sunny	Skiophyte	Moist	Park	Tree (<10m)	5-10cm	109.1	Vegetative	Loamy	Red	29.77	12.03	48.13	28.1	City Park	Longmo Lake	24.0022	97.8434	730
T386	ZC_RS06	Tracheophyta	Liliopsida	Asparagales	Asparagaceae	Dracaena	Dracaena unassigned	Sunny	Skiophyte	Moist	Park	Tree (<10m)	5-10cm	106.9	Vegetative	Loamy	Red	29.77	12.03	48.13	28.1	City Park	Longmo Lake	24.0022	97.8434	730
T141	FG_RS24	Tracheophyta	Liliopsida	Asparagales	Amaryllidaceae	Hymenocallis	Hymenocallis littoralis	Sunny	Skiophyte	Moist	Park	Herb	5-10cm	102.5	Vegetative	Loamy	Brown	25.07	10.57	42.27	21.79	City Park	Nanmao Lake	24.0101	97.8734	720
T141	KI_RS03	Tracheophyta	Liliopsida	Asparagales	Amaryllidaceae	Hymenocallis	Hymenocallis littoralis	Sunny	Skiophyte	Moist	Park	Herb	5-10cm	104.1	Vegetative	Loamy	Brown	25.07	10.57	42.27	21.79	City Park	Nanmao Lake	24.0101	97.8734	720
T141	KI_RS04	Tracheophyta	Liliopsida	Asparagales	Amaryllidaceae	Hymenocallis	Hymenocallis littoralis	Sunny	Skiophyte	Moist	Park	Herb	5-10cm	80.9	Vegetative	Loamy	Brown	25.07	10.57	42.27	21.79	City Park	Nanmao Lake	24.0101	97.8734	720
T416	ZA_RS04	Tracheophyta	Liliopsida	Asparagales	Amaryllidaceae	Hymenocallis	Hymenocallis littoralis	Sunny	Heliophyte	Moist	Park	Herb	0-5cm	111.2	Vegetative	Loamy	Red	23.8	10.17	40.67	27.87	City Park	Longmo Lake	24.0012	97.8343	730
T416	ZA_RS03	Tracheophyta	Liliopsida	Asparagales	Amaryllidaceae	Hymenocallis	Hymenocallis littoralis	Sunny	Heliophyte	Moist	Park	Herb	0-5cm	110.9	Vegetative	Loamy	Red	23.8	10.17	40.67	27.87	City Park	Longmo Lake	24.0012	97.8343	730
T416	ZA_RS05	Tracheophyta	Liliopsida	Asparagales	Amaryllidaceae	Hymenocallis	Hymenocallis littoralis	Sunny	Heliophyte	Moist	Park	Herb	0-5cm	105.1	Vegetative	Loamy	Red	23.8	10.17	40.67	27.87	City Park	Longmo Lake	24.0012	97.8343	730
C086	FE_RS09	Tracheophyta	Liliopsida	Asparagales	Asparagaceae	Ophiopogon	Ophiopogon bodinieri	Sunny	Skiophyte	Moist	Reserve	Herb	0-5cm	64.4	Vegetative	Loamy	Brown					Moli Rainforest	Moli Rainforest	24.116	97.981	921
T339	ZB_RS07	Tracheophyta	Liliopsida	Asparagales	Asparagaceae	Ophiopogon	Ophiopogon bodinieri	Sunny	Heliophyte	Moist	Park	Herb	0-5cm	109.2	Vegetative	Loamy	Red					City Park	Longmo Lake	24.0022	97.8425	730
T179	LF_RS13	Tracheophyta	Liliopsida	Asparagales	Asparagaceae	Ophiopogon	Ophiopogon japonicus	Sunny	Heliophyte	Dry	Park	Herb	0-5cm	87.1	Vegetative	Loamy	Brown					City Park	Nanmao Lake	24.0107	97.8694	726
T179	LF_RS15	Tracheophyta	Liliopsida	Asparagales	Asparagaceae	Ophiopogon	Ophiopogon japonicus	Sunny	Heliophyte	Dry	Park	Herb	0-5cm	53.5	Vegetative	Loamy	Brown					City Park	Nanmao Lake	24.0107	97.8694	726
T179	LF_RS14	Tracheophyta	Liliopsida	Asparagales	Asparagaceae	Ophiopogon	Ophiopogon japonicus	Sunny	Heliophyte	Dry	Park	Herb	0-5cm	91.7	Vegetative	Loamy	Brown					City Park	Nanmao Lake	24.0107	97.8694	726
C070	XH_RS07	Tracheophyta	Liliopsida	Asparagales	Asparagaceae	Peliosanthes	Peliosanthes yunnanensis	Sunny	Skiophyte	Moist	Reserve	Herb	0-5cm	97.6	Vegetative	Loamy	Brown	28.43	11.63	44.2	18	Moli Rainforest	Moli Rainforest	24.1154	97.9815	906
C070	XH_RS06	Tracheophyta	Liliopsida	Asparagales	Asparagaceae	Peliosanthes	Peliosanthes yunnanensis	Sunny	Skiophyte	Moist	Reserve	Herb	0-5cm	77.1	Vegetative	Loamy	Brown	28.43	11.63	44.2	18	Moli Rainforest	Moli Rainforest	24.1154	97.9815	906
C070	XH_RS08	Tracheophyta	Liliopsida	Asparagales	Asparagaceae	Peliosanthes	Peliosanthes yunnanensis	Sunny	Skiophyte	Moist	Reserve	Herb	0-5cm	43.1	Vegetative	Loamy	Brown	28.43	11.63	44.2	18	Moli Rainforest	Moli Rainforest	24.1154	97.9815	906
E074	XD_RS10	Tracheophyta	Liliopsida	Asparagales	Asparagaceae	Polygonatum	Polygonatum cirrhifolium	Shower	Skiophyte	Moist	Hillside	Herb	0-5cm	100.9	Vegetative	Loamy	Brown	33	13.1	52.4	15.25	Botanical Garden	Botanical Garden	24.0705	97.818	1111
B055	KC_RS15	Tracheophyta	Liliopsida	Asparagales	Asparagaceae	Polygonatum	Polygonatum odoratum	Sunny	Skiophyte	Moist	Hillside	Herb	0-5cm	104.2	Vegetative	Loamy	Brown	31.93	12.93	50.93	16.29	Botanical Garden	Botanical Garden	24.0707	97.8175	1112
B055	KC_RS13	Tracheophyta	Liliopsida	Asparagales	Asparagaceae	Polygonatum	Polygonatum odoratum	Sunny	Skiophyte	Moist	Hillside	Herb	0-5cm	121.2	Vegetative	Loamy	Brown	31.93	12.93	50.93	16.29	Botanical Garden	Botanical Garden	24.0707	97.8175	1112
B055	KC_RS14	Tracheophyta	Liliopsida	Asparagales	Asparagaceae	Polygonatum	Polygonatum odoratum	Sunny	Skiophyte	Moist	Hillside	Herb	0-5cm	103.9	Vegetative	Loamy	Brown	31.93	12.93	50.93	16.29	Botanical Garden	Botanical Garden	24.0707	97.8175	1112
C077	FE_RS18	Tracheophyta	Liliopsida	Asparagales	Asparagaceae	Polygonatum	Polygonatum odoratum	Sunny	Skiophyte	Moist	Reserve	Herb	0-5cm	100.7	Vegetative	Loamy	Brown	38.37	14.77	59.07	19.5	Moli Rainforest	Moli Rainforest	24.1149	97.9821	900
C077	FE_RS15	Tracheophyta	Liliopsida	Asparagales	Asparagaceae	Polygonatum	Polygonatum odoratum	Sunny	Skiophyte	Moist	Reserve	Herb	0-5cm	65.5	Vegetative	Loamy	Brown	38.37	14.77	59.07	19.5	Moli Rainforest	Moli Rainforest	24.1149	97.9821	900
C077	FE_RS20	Tracheophyta	Liliopsida	Asparagales	Asparagaceae	Polygonatum	Polygonatum odoratum	Sunny	Skiophyte	Moist	Reserve	Herb	0-5cm	105.9	Vegetative	Loamy	Brown	38.37	14.77	59.07	19.5	Moli Rainforest	Moli Rainforest	24.1149	97.9821	900
C060	FD_RS01	Tracheophyta	Liliopsida	Asparagales	Amaryllidaceae	Urceolina	Urceolina grandiflora	Sunny	Heliophyte	Moist	Reserve	Herb	0-5cm	109.1	Vegetative	Loamy	Brown	22.7	9.8	39	16.81	Moli Rainforest	Moli Rainforest	24.1161	97.9802	932
C060	FC_RS11	Tracheophyta	Liliopsida	Asparagales	Amaryllidaceae	Urceolina	Urceolina grandiflora	Sunny	Heliophyte	Moist	Reserve	Herb	0-5cm	102.8	Vegetative	Loamy	Brown	22.7	9.8	39	16.81	Moli Rainforest	Moli Rainforest	24.1161	97.9802	932
C060	FE_RS13	Tracheophyta	Liliopsida	Asparagales	Amaryllidaceae	Urceolina	Urceolina grandiflora	Sunny	Heliophyte	Moist	Reserve	Herb	0-5cm	95.3	Vegetative	Loamy	Brown	22.7	9.8	39	16.81	Moli Rainforest	Moli Rainforest	24.1161	97.9802	932
T283	FA_RS04	Tracheophyta	Liliopsida	Asparagales	Amaryllidaceae	Urceolina	Urceolina grandiflora	Sunny	Skiophyte	Moist	Reserve	Herb	0-5cm	60	Flowering	Loamy	Brown	34	13.4	53.6	21.83	Moli Rainforest	Moli Rainforest	24.1129	97.9843	861
T283	FA_RS01	Tracheophyta	Liliopsida	Asparagales	Amaryllidaceae	Urceolina	Urceolina grandiflora	Sunny	Skiophyte	Moist	Reserve	Herb	0-5cm	45	Flowering	Loamy	Brown	34	13.4	53.6	21.83	Moli Rainforest	Moli Rainforest	24.1129	97.9843	861
T283	KF_RS13	Tracheophyta	Liliopsida	Asparagales	Amaryllidaceae	Urceolina	Urceolina grandiflora	Sunny	Skiophyte	Moist	Reserve	Herb	0-5cm	65.9	Flowering	Loamy	Brown	34	13.4	53.6	21.83	Moli Rainforest	Moli Rainforest	24.1129	97.9843	861
T105	LK_RS06	Tracheophyta	Liliopsida	Asparagales	Asparagaceae	Yucca	Yucca gloriosa	Sunny	Heliophyte	Moist	Park	Shrub (<2m)	5-10cm	99.7	Vegetative	Loamy	Brown	42.9	16.23	64.93	18.39	City Park	Nanmao Lake	24.0094	97.8707	719
T105	LK_RS07	Tracheophyta	Liliopsida	Asparagales	Asparagaceae	Yucca	Yucca gloriosa	Sunny	Heliophyte	Moist	Park	Shrub (<2m)	5-10cm	101.2	Vegetative	Loamy	Brown	42.9	16.23	64.93	18.39	City Park	Nanmao Lake	24.0094	97.8707	719
T105	LK_RS08	Tracheophyta	Liliopsida	Asparagales	Asparagaceae	Yucca	Yucca gloriosa	Sunny	Heliophyte	Moist	Park	Shrub (<2m)	5-10cm	100.4	Vegetative	Loamy	Brown	42.9	16.23	64.93	18.39	City Park	Nanmao Lake	24.0094	97.8707	719
E010	XC_RS19	Tracheophyta	Magnoliopsida	Asterales	Asteraceae	Ageratina	Ageratina adenophora	Shower	Skiophyte	Moist	Hillside	Herb	0-5cm	40.9	Vegetative	Loamy	Brown	33	12.8	52.4	19.16	Botanical Garden	Botanical Garden	24.0706	97.8201	1072
B045	HE_RS18	Tracheophyta	Magnoliopsida	Asterales	Asteraceae	Ageratum	Ageratum conyzoides	Sunny	Heliophyte	Moist	Hillside	Herb	0-5cm	60.4	Fruiting	Loamy	Brown	30.83	11.3	45.47	18.37	Botanical Garden	Botanical Garden	24.0701	97.8182	1119
T347	LA_RS11	Tracheophyta	Magnoliopsida	Asterales	Asteraceae	Ageratum	Ageratum conyzoides	Sunny	Skiophyte	Moist	Park	Herb	0-5cm	106.2	Flowering	Loamy	Red	20.97	9.27	37.07	26.62	City Park	Longmo Lake	24.0025	97.8422	730
E026	KA_RS02	Tracheophyta	Magnoliopsida	Asterales	Asteraceae	Bidens	Bidens pilosa	Shower	Heliophyte	Moist	Hillside	Herb	0-5cm	99.4	Flowering	Loamy	Brown	24.73	10.47	41.87	18.77	Botanical Garden	Botanical Garden	24.0709	97.8198	1082
T345	LA_RS07	Tracheophyta	Magnoliopsida	Asterales	Asteraceae	Blumea	Blumea saussureoides	Sunny	Skiophyte	Moist	Park		0-5cm	75.1	Vegetative	Loamy	Red	25.53	10.73	42.93	26.68	City Park	Longmo Lake	24.0025	97.8422	730
T345	LA_RS09	Tracheophyta	Magnoliopsida	Asterales	Asteraceae	Blumea	Blumea saussureoides	Sunny	Skiophyte	Moist	Park		0-5cm	102.9	Vegetative	Loamy	Red	25.53	10.73	42.93	26.68	City Park	Longmo Lake	24.0025	97.8422	730
T345	LA_RS08	Tracheophyta	Magnoliopsida	Asterales	Asteraceae	Blumea	Blumea saussureoides	Sunny	Skiophyte	Moist	Park		0-5cm	110.2	Vegetative	Loamy	Red	25.53	10.73	42.93	26.68	City Park	Longmo Lake	24.0025	97.8422	730
E027	XD_RS03	Tracheophyta	Magnoliopsida	Asterales	Asteraceae	Cancrinia	Cancrinia discoidea	Shower	Heliophyte	Moist	Hillside	Herb	0-5cm	99.4	Flowering	Loamy	Brown	24.83	10.53	42	19.37	Botanical Garden	Botanical Garden	24.0709	97.8197	1082
B046	HE_RS19	Tracheophyta	Magnoliopsida	Asterales	Asteraceae	Crassocephalum	Crassocephalum crepidioides	Sunny	Heliophyte	Moist	Hillside	Herb	0-5cm	71.9	Fruiting	Loamy	Brown	25.3	10.63	42.67	18.39	Botanical Garden	Botanical Garden	24.0701	97.8182	1119
E004	XC_RS14	Tracheophyta	Magnoliopsida	Asterales	Asteraceae	Dichrocephala	Dichrocephala integrifolia	Shower	Skiophyte	Moist	Hillside	Herb	0-5cm	103.7	Vegetative	Loamy	Brown	30.17	12.2	48.8	18.91	Botanical Garden	Botanical Garden	24.0706	97.8201	1076
E016	XC_RS24	Tracheophyta	Magnoliopsida	Asterales	Campanulaceae	Lobelia	Lobelia nummularia	Shower	Skiophyte	Moist	Hillside	Herb	0-5cm	120.7	Fruiting	Loamy	Brown					Botanical Garden	Botanical Garden	24.071	97.8197	1083
T073	XB_RS08	Tracheophyta	Magnoliopsida	Asterales	Asteraceae	Mikania	Mikania micrantha	Sunny	Skiophyte	Moist	Beach	Vine	5-10cm	152.5	Flowering	Sandy	Yellow	23.1	9.93	39.73	28.64	Wanding Town	Huihuan Beach	24.1289	98.0503	738
T073	XB_RS09	Tracheophyta	Magnoliopsida	Asterales	Asteraceae	Mikania	Mikania micrantha	Sunny	Skiophyte	Moist	Beach	Vine	5-10cm	144.7	Flowering	Sandy	Yellow	23.1	9.93	39.73	28.64	Wanding Town	Huihuan Beach	24.1289	98.0503	738
T073	XB_RS10	Tracheophyta	Magnoliopsida	Asterales	Asteraceae	Mikania	Mikania micrantha	Sunny	Skiophyte	Moist	Beach	Vine	5-10cm	138.2	Flowering	Sandy	Yellow	23.1	9.93	39.73	28.64	Wanding Town	Huihuan Beach	24.1289	98.0503	738
T390	ZC_RS15	Tracheophyta	Magnoliopsida	Asterales	Asteraceae	Mikania	Mikania micrantha	Sunny	Heliophyte	Moist	Park	Vine	0-5cm	105.4	Vegetative	Loamy	Red	30.93	12.43	49.73	28.43	City Park	Longmo Lake	24.0015	97.8418	730
T325	LC_RS08	Tracheophyta	Magnoliopsida	Asterales	Asteraceae	Sonchus	Sonchus oleraceus	Sunny	Heliophyte	Moist	Park	Herb	0-5cm	106.3	Vegetative	Loamy	Brown	17.47	8.17	32.67		City Park	Longmo Lake	24.0026	97.8433	730
T325	LC_RS06	Tracheophyta	Magnoliopsida	Asterales	Asteraceae	Sonchus	Sonchus oleraceus	Sunny	Heliophyte	Moist	Park	Herb	0-5cm	108.1	Vegetative	Loamy	Brown	17.47	8.17	32.67		City Park	Longmo Lake	24.0026	97.8433	730
T325	LC_RS07	Tracheophyta	Magnoliopsida	Asterales	Asteraceae	Sonchus	Sonchus oleraceus	Sunny	Heliophyte	Moist	Park	Herb	0-5cm	72.9	Vegetative	Loamy	Brown	17.47	8.17	32.67		City Park	Longmo Lake	24.0026	97.8433	730
E065	KA_RS18	Tracheophyta	Magnoliopsida	Asterales	Asteraceae	Strobocalyx	Strobocalyx esculenta	Shower	Heliophyte	Moist	Hillside	Tree (>10m)	5-10cm	102.5	Vegetative	Loamy	Brown	30.57	12.33	49.33	15.18	Botanical Garden	Botanical Garden	24.0703	97.8187	1122
T368	LC_RS21	Tracheophyta	Magnoliopsida	Asterales	Asteraceae	Symphyotrichum	Symphyotrichum subulatum	Sunny	Heliophyte	Moist	Park	Herb	0-5cm	109.7	Fruiting	Loamy	Red					City Park	Longmo Lake	23.9989	97.8395	730
T051	LP_RS05	Tracheophyta	Magnoliopsida	Asterales	Asteraceae	Tanacetum	Tanacetum parthenium	Sunny	Heliophyte	Moist	Nursery	Herb	5-10cm	92.8	Flowering	Loamy	Brown	29.67	12.07	48.27	29.29	Wanding Town	Huihuan Village	24.1194	98.0467	739
T322	LC_RS02	Tracheophyta	Magnoliopsida	Asterales	Asteraceae	Trommsdorffia	Trommsdorffia ciliata	Sunny	Heliophyte	Moist	Park	Herb	5-10cm	109.2	Flowering	Loamy	Brown					City Park	Longmo Lake	24.0029	97.843	730
T397	ZE_RS22	Tracheophyta	Magnoliopsida	Asterales	Asteraceae	Xanthium	Xanthium strumarium	Sunny	Heliophyte	Moist	Park	Herb	0-5cm	25.1	Vegetative	Sandy	Yellow	25.07	10.6	42.27	16.98	City Park	Longmo Lake	24.0016	97.8347	730
T065	LV_RS13	Tracheophyta	Magnoliopsida	Austrobaileyales	Schisandraceae	Schisandra	Schisandra propinqua	Sunny	Heliophyte	Moist	Hillside	Vine	0-5cm	82.1	Vegetative	Loamy	Brown	39.47	15.13	60.53	27.33	Wanding Town	Huihuan River	24.128	98.0521	738
C042	XG_RS23	Tracheophyta	Magnoliopsida	Boraginales	Ehretiaceae	Ehretia	Ehretia dunniana	Sunny	Heliophyte	Moist	Reserve	Tree (>10m)	0-5cm	113	Vegetative	Loamy	Brown					Moli Rainforest	Moli Rainforest	24.1052	97.981	842
T126	LI_RS24	Tracheophyta	Magnoliopsida	Boraginales	Ehretiaceae	Ehretia	Ehretia dunniana	Sunny	Heliophyte	Moist	Park	Tree (<10m)	5-10cm	103	Vegetative	Loamy	Brown	27.17	11.23	44.93	27.77	City Park	Nanmao Lake	24.0097	97.8737	725
C007	HF_RS11	Tracheophyta	Magnoliopsida	Brassicales	Capparaceae	Capparis	Capparis subsessilis	Sunny	Skiophyte	Moist	Reserve		0-5cm	78.9	Vegetative	Loamy	Brown	35.1	13.77	55.07	18.18	Moli Rainforest	Moli Rainforest	24.1076	97.9858	822
C072	XH_RS10	Tracheophyta	Magnoliopsida	Brassicales	Capparaceae	Capparis	Capparis urophylla	Sunny	Skiophyte	Moist	Reserve	Shrub (<2m)	0-5cm	101.8	Vegetative	Loamy	Brown	25.93	10.83	43.33	17.79	Moli Rainforest	Moli Rainforest	24.1154	97.9816	906
T052	LP_RS07	Tracheophyta	Magnoliopsida	Brassicales	Caricaceae	Carica	Carica papaya	Sunny	Heliophyte	Moist	Nursery	Tree (<10m)	5-10cm	47.7	Fruiting	Loamy	Brown	28.7	11.73	46.93	29.14	Wanding Town	Huihuan Village	24.1194	98.0467	739
T052	LP_RS06	Tracheophyta	Magnoliopsida	Brassicales	Caricaceae	Carica	Carica papaya	Sunny	Heliophyte	Moist	Nursery	Tree (<10m)	5-10cm	92.1	Fruiting	Loamy	Brown	28.7	11.73	46.93	29.14	Wanding Town	Huihuan Village	24.1194	98.0467	739
T315	FB_RS24	Tracheophyta	Magnoliopsida	Brassicales	Caricaceae	Carica	Carica papaya	Sunny	Heliophyte	Moist	Reserve	Tree (<10m)	5-10cm	102.8	Fruiting	Loamy	Brown	26.57	11.07	44.27	25.12	Moli Rainforest	Moli Rainforest	24.1114	97.9858	830
T415	ZA_RS02	Tracheophyta	Magnoliopsida	Buxales	Buxaceae	Buxus	Buxus sinica	Sunny	Skiophyte	Moist	Park	Shrub (<2m)	0-5cm	116.9	Vegetative	Loamy	Red	40.47	15.47	61.87	25.35	City Park	Longmo Lake	24.0007	97.8346	730
T415	ZA_RS01	Tracheophyta	Magnoliopsida	Buxales	Buxaceae	Buxus	Buxus sinica	Sunny	Skiophyte	Moist	Park	Shrub (<2m)	0-5cm	103.1	Vegetative	Loamy	Red	40.47	15.47	61.87	25.35	City Park	Longmo Lake	24.0007	97.8346	730
T415	LA_RS24	Tracheophyta	Magnoliopsida	Buxales	Buxaceae	Buxus	Buxus sinica	Sunny	Skiophyte	Moist	Park	Shrub (<2m)	0-5cm	103.8	Vegetative	Loamy	Red	40.47	15.47	61.87	25.35	City Park	Longmo Lake	24.0007	97.8346	730
B012	ZF_RS06	Tracheophyta	Magnoliopsida	Caryophyllales	Amaranthaceae	Achyranthes	Achyranthes aspera	Sunny	Skiophyte	Dry	Hillside	Herb	0-5cm	38.5	Fruiting	Loamy	Brown	22.57	9.8	39.2	17.62	Botanical Garden	Botanical Garden	24.0696	97.8199	1116
C019	HF_RS18	Tracheophyta	Magnoliopsida	Caryophyllales	Amaranthaceae	Achyranthes	Achyranthes aspera	Sunny	Skiophyte	Moist	Reserve	Herb	0-5cm	145.4	Fruiting	Loamy	Brown	30.67	12.33	49.33	19.56	Moli Rainforest	Moli Rainforest	24.107	97.9846	836
T263	CC_RS16	Tracheophyta	Magnoliopsida	Caryophyllales	Amaranthaceae	Alternanthera	Alternanthera brasiliana	Sunny	Heliophyte	Moist	Reserve	Herb	5-10cm	109.2	Vegetative	Loamy	Brown	35.77	13.97	55.87	22.79	Moli Rainforest	Moli Rainforest	24.1101	97.986	827
T263	CC_RS18	Tracheophyta	Magnoliopsida	Caryophyllales	Amaranthaceae	Alternanthera	Alternanthera brasiliana	Sunny	Heliophyte	Moist	Reserve	Herb	5-10cm	117.4	Vegetative	Loamy	Brown	35.77	13.97	55.87	22.79	Moli Rainforest	Moli Rainforest	24.1101	97.986	827
T263	CC_RS17	Tracheophyta	Magnoliopsida	Caryophyllales	Amaranthaceae	Alternanthera	Alternanthera brasiliana	Sunny	Heliophyte	Moist	Reserve	Herb	5-10cm	95.7	Vegetative	Loamy	Brown	35.77	13.97	55.87	22.79	Moli Rainforest	Moli Rainforest	24.1101	97.986	827
T335	ZB_RS03	Tracheophyta	Magnoliopsida	Caryophyllales	Amaranthaceae	Alternanthera	Alternanthera ficoidea	Sunny	Skiophyte	Moist	Park	Herb	0-5cm	126.6	Flowering	Loamy	Red	17.53	8.13	32.53	26.12	City Park	Longmo Lake	24.0023	97.8426	730
T167	LF_RS07	Tracheophyta	Magnoliopsida	Caryophyllales	Amaranthaceae	Alternanthera	Alternanthera philoxeroides	Sunny	Heliophyte	Moist	Park	Herb	5-10cm	101.9	Flowering	Loamy	Brown	35.13	13.77	55.07	25.48	City Park	Nanmao Lake	24.011	97.8702	727
T080	HA_RS07	Tracheophyta	Magnoliopsida	Caryophyllales	Nyctaginaceae	Bougainvillea	Bougainvillea glabra	Sunny	Skiophyte	Moist	Hillside	Shrub (<2m)	5-10cm	104.2	Vegetative	Loamy	Brown	40.9	15.6	62.4	27.56	Wanding Town	Huihuan River	24.1285	98.0505	773
T089	LS_RS07	Tracheophyta	Magnoliopsida	Caryophyllales	Nyctaginaceae	Bougainvillea	Bougainvillea glabra	Sunny	Skiophyte	Moist	Hillside	Shrub (<2m)	0-5cm	105.8	Flowering	Loamy	Red	22	9.6	38.4	24.44	Botanical Garden	Botanical Garden	24.0693	97.8199	1112
T268	FI_RS22	Tracheophyta	Magnoliopsida	Caryophyllales	Nyctaginaceae	Bougainvillea	Bougainvillea glabra	Sunny	Heliophyte	Moist	Reserve	Shrub (>2m)	5-10cm	114.6	Flowering	Loamy	Brown	26.67	11.07	44.27	22.41	Moli Rainforest	Moli Rainforest	24.1106	97.9854	834
T268	FI_RS24	Tracheophyta	Magnoliopsida	Caryophyllales	Nyctaginaceae	Bougainvillea	Bougainvillea glabra	Sunny	Heliophyte	Moist	Reserve	Shrub (>2m)	5-10cm	128.5	Flowering	Loamy	Brown	26.67	11.07	44.27	22.41	Moli Rainforest	Moli Rainforest	24.1106	97.9854	834
T268	FI_RS23	Tracheophyta	Magnoliopsida	Caryophyllales	Nyctaginaceae	Bougainvillea	Bougainvillea glabra	Sunny	Heliophyte	Moist	Reserve	Shrub (>2m)	5-10cm	106.9	Flowering	Loamy	Brown	26.67	11.07	44.27	22.41	Moli Rainforest	Moli Rainforest	24.1106	97.9854	834
T343	LA_RS03	Tracheophyta	Magnoliopsida	Caryophyllales	Nyctaginaceae	Bougainvillea	Bougainvillea glabra	Sunny	Heliophyte	Moist	Park	Shrub (<2m)	5-10cm	93.6	Flowering	Loamy	Red	34.43	13.57	54.27	26.87	City Park	Longmo Lake	24.0024	97.8421	730
T343	LA_RS02	Tracheophyta	Magnoliopsida	Caryophyllales	Nyctaginaceae	Bougainvillea	Bougainvillea glabra	Sunny	Heliophyte	Moist	Park	Shrub (<2m)	5-10cm	71.6	Flowering	Loamy	Red	34.43	13.57	54.27	26.87	City Park	Longmo Lake	24.0024	97.8421	730
T343	LA_RS01	Tracheophyta	Magnoliopsida	Caryophyllales	Nyctaginaceae	Bougainvillea	Bougainvillea glabra	Sunny	Heliophyte	Moist	Park	Shrub (<2m)	5-10cm	67.2	Flowering	Loamy	Red	34.43	13.57	54.27	26.87	City Park	Longmo Lake	24.0024	97.8421	730
B098	KB_RS17	Tracheophyta	Magnoliopsida	Caryophyllales	Polygonaceae	Fagopyrum	Fagopyrum dibotrys	Sunny	Skiophyte	Moist	Hillside	Herb	0-5cm	109.9	Vegetative	Loamy	Brown	27.57	11.27	45.47	17.25	Botanical Garden	Botanical Garden	24.0698	97.8177	1113
E008	XC_RS17	Tracheophyta	Magnoliopsida	Caryophyllales	Polygonaceae	Persicaria	Persicaria chinensis	Shower	Skiophyte	Moist	Hillside	Herb	0-5cm	118.5	Vegetative	Loamy	Brown	34.43	13.53	54.13	19.27	Botanical Garden	Botanical Garden	24.0706	97.8201	1073
E009	XC_RS18	Tracheophyta	Magnoliopsida	Caryophyllales	Polygonaceae	Persicaria	Persicaria hydropiper	Shower	Skiophyte	Moist	Hillside	Herb	0-5cm	106.6	Vegetative	Loamy	Brown	31.53	12.63	51.83	19.2	Botanical Garden	Botanical Garden	24.0706	97.8201	1072
C090	FE_RS02	Tracheophyta	Magnoliopsida	Celastrales	Celastraceae	Euonymus	Euonymus macropterus	Sunny	Skiophyte	Moist	Reserve	Shrub (<2m)	0-5cm	44.5	Vegetative	Loamy	Brown	28.3	11.63	46.53	17.77	Moli Rainforest	Moli Rainforest	24.1131	97.9839	914
C090	FE_RS04	Tracheophyta	Magnoliopsida	Celastrales	Celastraceae	Euonymus	Euonymus macropterus	Sunny	Skiophyte	Moist	Reserve	Shrub (<2m)	0-5cm	15.9	Vegetative	Loamy	Brown	28.3	11.63	46.53	17.77	Moli Rainforest	Moli Rainforest	24.1131	97.9839	914
C090	FE_RS03	Tracheophyta	Magnoliopsida	Celastrales	Celastraceae	Euonymus	Euonymus macropterus	Sunny	Skiophyte	Moist	Reserve	Shrub (<2m)	0-5cm	18.7	Vegetative	Loamy	Brown	28.3	11.63	46.53	17.77	Moli Rainforest	Moli Rainforest	24.1131	97.9839	914
A062	FG_RS17	Tracheophyta	Magnoliopsida	Celastrales	Celastraceae	Glyptopetalum	Glyptopetalum sclerocarpum	Sunny	Heliophyte	Moist	Hillside	Tree (<10m)	5-10cm	99.4	Vegetative	Loamy	Brown	38.7	14.9	59.6	23.75	Botanical Garden	Botanical Garden	24.0693	97.8207	1110
T077	HA_RS04	Tracheophyta	Magnoliopsida	Celastrales	Celastraceae	Gymnosporia	Gymnosporia oxyphylla	Sunny	Skiophyte	Moist	Hillside	Shrub (<2m)	5-10cm	5.5	Vegetative	Loamy	Brown	35.57	13.9	55.6	27.45	Wanding Town	Huihuan River	24.1283	98.0505	773
B066	HD_RS07	Tracheophyta	Liliopsida	Commelinales	Commelinaceae	Amischotolype	Amischotolype hispida	Sunny	Skiophyte	Moist	Hillside	Herb	0-5cm	101.7	Flowering	Loamy	Brown	26.87	11.13	44.53	17.91	Botanical Garden	Botanical Garden	24.071	97.817	1137
B047	LU_RS10	Tracheophyta	Liliopsida	Commelinales	Commelinaceae	Commelina	Commelina communis	Sunny	Heliophyte	Moist	Hillside	Herb	0-5cm	109.4	Vegetative	Loamy	Brown	30.77	12.4	49.6	15.58	Botanical Garden	Botanical Garden	24.0701	97.8182	1119
T346	LA_RS10	Tracheophyta	Liliopsida	Commelinales	Commelinaceae	Commelina	Commelina communis	Sunny	Skiophyte	Moist	Park	Herb	0-5cm	24.9	Vegetative	Loamy	Red	26.97	11.17	44.67	26.45	City Park	Longmo Lake	24.0025	97.8422	730
C079	XH_RS20	Tracheophyta	Liliopsida	Commelinales	Commelinaceae	Pollia	Pollia japonica	Sunny	Skiophyte	Moist	Reserve	Herb	0-5cm	101.8	Fruiting	Loamy	Brown	28.13	12.5	50	19.66	Moli Rainforest	Moli Rainforest	24.1145	97.9824	900
T293	ZH_RS08	Tracheophyta	Liliopsida	Commelinales	Commelinaceae	Tradescantia	Tradescantia zebrina	Sunny	Skiophyte	Moist	Reserve	Herb	0-5cm	4.9	Vegetative	Loamy	Brown	27.33	11.3	45.2	16.37	Moli Rainforest	Moli Rainforest	24.1142	97.983	885
C053	FD_RS17	Tracheophyta	Magnoliopsida	Cornales	Cornaceae	Alangium	Alangium chinense	Sunny	Skiophyte	Moist	Reserve	Shrub (>2m)	0-5cm	39.9	Vegetative	Loamy	Brown	32.03	12.8	51.2	17.52	Moli Rainforest	Moli Rainforest	24.1084	97.9871	842
C053	FD_RS15	Tracheophyta	Magnoliopsida	Cornales	Cornaceae	Alangium	Alangium chinense	Sunny	Skiophyte	Moist	Reserve	Shrub (>2m)	0-5cm	52.8	Vegetative	Loamy	Brown	32.03	12.8	51.2	17.52	Moli Rainforest	Moli Rainforest	24.1084	97.9871	842
C053	FD_RS16	Tracheophyta	Magnoliopsida	Cornales	Cornaceae	Alangium	Alangium chinense	Sunny	Skiophyte	Moist	Reserve	Shrub (>2m)	0-5cm	56.8	Vegetative	Loamy	Brown	32.03	12.8	51.2	17.52	Moli Rainforest	Moli Rainforest	24.1084	97.9871	842
T087	HA_RS15	Tracheophyta	Magnoliopsida	Cornales	Cornaceae	Alangium	Alangium chinense	Sunny	Skiophyte	Moist	Hillside	Shrub (<2m)	0-5cm	26.7	Vegetative	Loamy	Brown					Wanding Town	Huihuan River	24.1209	98.0431	851
B039	HE_RS09	Tracheophyta	Magnoliopsida	Cornales	Cornaceae	Cornus	Cornus capitata	Sunny	Skiophyte	Moist	Hillside	Tree (<10m)	5-10cm	103.7	Vegetative	Loamy	Brown	33.03	13.1	52.4	18.77	Botanical Garden	Botanical Garden	24.0694	97.8185	1113
A056	KH_RS07	Tracheophyta	Magnoliopsida	Cornales	Hydrangeaceae	Hydrangea	Hydrangea febrifuga	Sunny	Skiophyte	Moist	Hillside	Shrub (<2m)	15-20cm	101.8	Vegetative	Loamy	Brown	25.9	10.83	43.33	21.62	Botanical Garden	Botanical Garden	24.0716	97.8166	1120
B106	HC_RS07	Tracheophyta	Magnoliopsida	Cornales	Nyssaceae	Nyssa	Nyssa shweliensis	Sunny	Skiophyte	Moist	Hillside	Tree (<10m)	10-15cm	104.1	Vegetative	Loamy	Brown	31.47	12.63	50.53	18.16	Botanical Garden	Botanical Garden	24.0699	97.8177	1106
C043	XG_RS24	Tracheophyta	Magnoliopsida	Crossosomatales	Staphyleaceae	Staphylea	Staphylea japonica	Sunny	Skiophyte	Moist	Reserve	Tree (<10m)	0-5cm	102.6	Vegetative	Loamy	Brown	38.5	14.87	59.47	20.64	Moli Rainforest	Moli Rainforest	24.1052	97.981	842
C024	KG_RS22	Tracheophyta	Magnoliopsida	Cucurbitales	Begoniaceae	Begonia	Begonia grandis	Sunny	Skiophyte	Moist	Reserve	Herb	0-5cm	106.5	Vegetative	Loamy	Brown	30.9	12.43	49.73	19.62	Moli Rainforest	Moli Rainforest	24.1067	97.9838	838
C024	KG_RS21	Tracheophyta	Magnoliopsida	Cucurbitales	Begoniaceae	Begonia	Begonia grandis	Sunny	Skiophyte	Moist	Reserve	Herb	0-5cm	101.3	Vegetative	Loamy	Brown	30.9	12.43	49.73	19.62	Moli Rainforest	Moli Rainforest	24.1067	97.9838	838
C024	KG_RS20	Tracheophyta	Magnoliopsida	Cucurbitales	Begoniaceae	Begonia	Begonia grandis	Sunny	Skiophyte	Moist	Reserve	Herb	0-5cm	105.9	Vegetative	Loamy	Brown	30.9	12.43	49.73	19.62	Moli Rainforest	Moli Rainforest	24.1067	97.9838	838
A051	FH_RS22	Tracheophyta	Magnoliopsida	Cucurbitales	Begoniaceae	Begonia	Begonia handelii	Sunny	Skiophyte	Moist	Hillside	Herb	0-5cm	33.7	Vegetative	Loamy	Brown	30.63	12.33	49.33	21.89	Botanical Garden	Botanical Garden	24.0713	97.8175	1132
A052	FH_RS21	Tracheophyta	Magnoliopsida	Cucurbitales	Begoniaceae	Begonia	Begonia handelii	Sunny	Skiophyte	Moist	Hillside	Herb	0-5cm	66.6	Vegetative	Loamy	Brown	27.6	11.37	45.47	21.87	Botanical Garden	Botanical Garden	24.0715	97.8173	1132
A052	FH_RS20	Tracheophyta	Magnoliopsida	Cucurbitales	Begoniaceae	Begonia	Begonia handelii	Sunny	Skiophyte	Moist	Hillside	Herb	0-5cm	98.5	Vegetative	Loamy	Brown	27.6	11.37	45.47	21.87	Botanical Garden	Botanical Garden	24.0715	97.8173	1132
B097	HD_RS21	Tracheophyta	Magnoliopsida	Cucurbitales	Begoniaceae	Begonia	Begonia longifolia	Sunny	Skiophyte	Moist	Hillside	Herb	0-5cm	113.5	Vegetative	Loamy	Brown	32.67	12.97	51.87	16.95	Botanical Garden	Botanical Garden	24.0698	97.8177	1113
B097	KB_RS07	Tracheophyta	Magnoliopsida	Cucurbitales	Begoniaceae	Begonia	Begonia longifolia	Sunny	Skiophyte	Moist	Hillside	Herb	0-5cm	101.8	Vegetative	Loamy	Brown	32.67	12.97	51.87	16.95	Botanical Garden	Botanical Garden	24.0698	97.8177	1113
B097	KB_RS08	Tracheophyta	Magnoliopsida	Cucurbitales	Begoniaceae	Begonia	Begonia longifolia	Sunny	Skiophyte	Moist	Hillside	Herb	0-5cm	111	Vegetative	Loamy	Brown	32.67	12.97	51.87	16.95	Botanical Garden	Botanical Garden	24.0698	97.8177	1113
E071	KB_RS20	Tracheophyta	Magnoliopsida	Cucurbitales	Begoniaceae	Begonia	Begonia longifolia	Shower	Skiophyte	Moist	Hillside	Herb	0-5cm	116.4	Vegetative	Loamy	Brown	22.3	9.9	37.9	15.4	Botanical Garden	Botanical Garden	24.0705	97.8179	1111
E042	KA_RS09	Tracheophyta	Magnoliopsida	Cucurbitales	Begoniaceae	Begonia	Begonia maculata	Shower	Skiophyte	Moist	Hillside	Herb	0-5cm	102.8	Vegetative	Loamy	Brown	26.13	10.93	43.73	16.24	Botanical Garden	Botanical Garden	24.0702	97.82	1102
A048	KI_RS23	Tracheophyta	Magnoliopsida	Cucurbitales	Begoniaceae	Begonia	Begonia silletensis	Sunny	Skiophyte	Moist	Hillside	Herb	0-5cm	101.2	Vegetative	Loamy	Brown	28.5	11.7	46.8	22	Botanical Garden	Botanical Garden	24.0715	97.8177	1133
A048	KI_RS24	Tracheophyta	Magnoliopsida	Cucurbitales	Begoniaceae	Begonia	Begonia silletensis	Sunny	Skiophyte	Moist	Hillside	Herb	0-5cm	104.2	Vegetative	Loamy	Brown	28.5	11.7	46.8	22	Botanical Garden	Botanical Garden	24.0715	97.8177	1133
A048	KI_RS22	Tracheophyta	Magnoliopsida	Cucurbitales	Begoniaceae	Begonia	Begonia silletensis	Sunny	Skiophyte	Moist	Hillside	Herb	0-5cm	121.6	Vegetative	Loamy	Brown	28.5	11.7	46.8	22	Botanical Garden	Botanical Garden	24.0715	97.8177	1133
B082	XF_RS16	Tracheophyta	Magnoliopsida	Cucurbitales	Cucurbitaceae	Gynostemma	Gynostemma pentaphyllum	Sunny	Skiophyte	Moist	Hillside	Vine	0-5cm	111.4	Vegetative	Loamy	Brown	28.03	11.5	46	21.02	Botanical Garden	Botanical Garden	24.0727	97.8169	1135
T076	HA_RS02	Tracheophyta	Magnoliopsida	Cucurbitales	Cucurbitaceae	Gynostemma	Gynostemma pentaphyllum	Sunny	Skiophyte	Moist	Hillside	Vine	0-5cm	28.2	Vegetative	Loamy	Brown	29.03	11.83	47.33	24.7	Wanding Town	Huihuan River	24.1281	98.0503	773
T076	HA_RS03	Tracheophyta	Magnoliopsida	Cucurbitales	Cucurbitaceae	Gynostemma	Gynostemma pentaphyllum	Sunny	Skiophyte	Moist	Hillside	Vine	0-5cm	25	Vegetative	Loamy	Brown	29.03	11.83	47.33	24.7	Wanding Town	Huihuan River	24.1281	98.0503	773
T076	HA_RS01	Tracheophyta	Magnoliopsida	Cucurbitales	Cucurbitaceae	Gynostemma	Gynostemma pentaphyllum	Sunny	Skiophyte	Moist	Hillside	Vine	0-5cm	39.2	Vegetative	Loamy	Brown	29.03	11.83	47.33	24.7	Wanding Town	Huihuan River	24.1281	98.0503	773
D004	LU_RS05	Tracheophyta	Magnoliopsida	Cucurbitales	Cucurbitaceae	Sechium	Sechium edule	Sunny	Heliophyte	Moist	Hillside	Vine	0-5cm	100.2	Vegetative	Loamy	Brown	26.33	10.97	43.87	18.45	Botanical Garden	Botanical Garden	24.0685	97.8213	1094
A024	HB_RS05	Tracheophyta	Magnoliopsida	Cucurbitales	Tetramelaceae	Tetrameles	Tetrameles nudiflora	Sunny	Heliophyte	Moist	Hillside	Tree (>10m)	5-10cm	74.5	Vegetative	Loamy	Brown					Botanical Garden	Botanical Garden	24.0694	97.8203	1096
A024	HB_RS06	Tracheophyta	Magnoliopsida	Cucurbitales	Tetramelaceae	Tetrameles	Tetrameles nudiflora	Sunny	Heliophyte	Moist	Hillside	Tree (>10m)	5-10cm	68.9	Vegetative	Loamy	Brown					Botanical Garden	Botanical Garden	24.0694	97.8203	1096
A024	HB_RS04	Tracheophyta	Magnoliopsida	Cucurbitales	Tetramelaceae	Tetrameles	Tetrameles nudiflora	Sunny	Heliophyte	Moist	Hillside	Tree (>10m)	5-10cm	102	Vegetative	Loamy	Brown					Botanical Garden	Botanical Garden	24.0694	97.8203	1096
E043	XC_RS05	Tracheophyta	Magnoliopsida	Cucurbitales	Cucurbitaceae	Thladiantha	Thladiantha hookeri	Shower	Skiophyte	Moist	Hillside	Herb	0-5cm	89	Vegetative	Loamy	Brown	38.33	14.77	59.07	17.85	Botanical Garden	Botanical Garden	24.0701	97.82	1098
T359	ZB_RS15	Tracheophyta	Magnoliopsida	Cucurbitales	Cucurbitaceae	Trichosanthes	Trichosanthes laceribractea	Sunny	Skiophyte	Moist	Park		0-5cm	62.2	Vegetative	Loamy	Brown	24.43	10.37	41.47	20.45	City Park	Longmo Lake	23.999	97.8402	730
E028	KA_RS08	Tracheophyta	Magnoliopsida	Cucurbitales	Cucurbitaceae	Zehneria	Zehneria bodinieri	Shower	Skiophyte	Moist	Hillside	Vine	0-5cm	102.9	Fruiting	Loamy	Brown	26.43	10.9	44	19.37	Botanical Garden	Botanical Garden	24.0709	97.8197	1082
T035	LQ_RS03	Tracheophyta	Polypodiopsida	Cyatheales	Cyatheaceae	Alsophila	Alsophila spinulosa	Sunny	Skiophyte	Moist	Hillside	Tree (<10m)	0-5cm	99.4	Vegetative	Loamy	Brown	35.9	14.03	56.13	22.39	Botanical Garden	Botanical Garden	24.0704	97.818	1117
T035	LQ_RS02	Tracheophyta	Polypodiopsida	Cyatheales	Cyatheaceae	Alsophila	Alsophila spinulosa	Sunny	Skiophyte	Moist	Hillside	Tree (<10m)	0-5cm	100.9	Vegetative	Loamy	Brown	35.9	14.03	56.13	22.39	Botanical Garden	Botanical Garden	24.0704	97.818	1117
T035	LQ_RS01	Tracheophyta	Polypodiopsida	Cyatheales	Cyatheaceae	Alsophila	Alsophila spinulosa	Sunny	Skiophyte	Moist	Hillside	Tree (<10m)	0-5cm	76.6	Vegetative	Loamy	Brown	35.9	14.03	56.13	22.39	Botanical Garden	Botanical Garden	24.0704	97.818	1117
T311	FB_RS13	Tracheophyta	Polypodiopsida	Cyatheales	Cyatheaceae	Alsophila	Alsophila spinulosa	Sunny	Skiophyte	Moist	Reserve	Tree (<10m)	0-5cm	105.8	Vegetative	Loamy	Brown					Moli Rainforest	Moli Rainforest	24.1157	97.9805	833
T311	CA_RS06	Tracheophyta	Polypodiopsida	Cyatheales	Cyatheaceae	Alsophila	Alsophila spinulosa	Sunny	Skiophyte	Moist	Reserve	Tree (<10m)	0-5cm	118.5	Vegetative	Loamy	Brown					Moli Rainforest	Moli Rainforest	24.1157	97.9805	833
T311	FB_RS11	Tracheophyta	Polypodiopsida	Cyatheales	Cyatheaceae	Alsophila	Alsophila spinulosa	Sunny	Skiophyte	Moist	Reserve	Tree (<10m)	0-5cm	128.1	Vegetative	Loamy	Brown					Moli Rainforest	Moli Rainforest	24.1157	97.9805	833
T027	LR_RS05	Tracheophyta	Polypodiopsida	Cyatheales	Cibotiaceae	Cibotium	Cibotium barometz	Sunny	Skiophyte	Moist	Hillside	Herb	10-15cm	106.5	Vegetative	Loamy	Brown	25.73	10.47	43.2	23.62	Botanical Garden	Botanical Garden	24.0709	97.8184	1135
T027	LR_RS06	Tracheophyta	Polypodiopsida	Cyatheales	Cibotiaceae	Cibotium	Cibotium barometz	Sunny	Skiophyte	Moist	Hillside	Herb	10-15cm	67.6	Vegetative	Loamy	Brown	25.73	10.47	43.2	23.62	Botanical Garden	Botanical Garden	24.0709	97.8184	1135
T027	LR_RS04	Tracheophyta	Polypodiopsida	Cyatheales	Cibotiaceae	Cibotium	Cibotium barometz	Sunny	Skiophyte	Moist	Hillside	Herb	10-15cm	90.1	Vegetative	Loamy	Brown	25.73	10.47	43.2	23.62	Botanical Garden	Botanical Garden	24.0709	97.8184	1135
C022	KG_RS15	Tracheophyta	Polypodiopsida	Cyatheales	Cyatheaceae	Sphaeropteris	Sphaeropteris brunoniana	Sunny	Skiophyte	Moist	Reserve	Tree (<10m)	5-10cm	103.4	Vegetative	Loamy	Brown					Moli Rainforest	Moli Rainforest	24.1068	97.9841	838
C022	KG_RS16	Tracheophyta	Polypodiopsida	Cyatheales	Cyatheaceae	Sphaeropteris	Sphaeropteris brunoniana	Sunny	Skiophyte	Moist	Reserve	Tree (<10m)	5-10cm	101.6	Vegetative	Loamy	Brown					Moli Rainforest	Moli Rainforest	24.1068	97.9841	838
C022	KG_RS14	Tracheophyta	Polypodiopsida	Cyatheales	Cyatheaceae	Sphaeropteris	Sphaeropteris brunoniana	Sunny	Skiophyte	Moist	Reserve	Tree (<10m)	5-10cm	100.6	Vegetative	Loamy	Brown					Moli Rainforest	Moli Rainforest	24.1068	97.9841	838
A061	FG_RS12	Tracheophyta	Magnoliopsida	Dilleniales	Dilleniaceae	Dillenia	Dillenia pentagyna	Sunny	Heliophyte	Moist	Hillside	Tree (<10m)	10-15cm	98.9	Vegetative	Loamy	Brown	23.97	10.23	40.93	21.62	Botanical Garden	Botanical Garden	24.0693	97.8207	1110
E013	XC_RS21	Tracheophyta	Magnoliopsida	Dipsacales	Caprifoliaceae	Lonicera	Lonicera japonica	Shower	Heliophyte	Moist	Hillside	Vine	0-5cm	101.5	Flowering	Loamy	Brown	35.33	13.83	55.33	19.48	Botanical Garden	Botanical Garden	24.0706	97.8199	1083
T054	XA_RS22	Tracheophyta	Magnoliopsida	Dipsacales	Caprifoliaceae	Lonicera	Lonicera japonica	Sunny	Heliophyte	Moist	Nursery	Vine	10-15cm	161	Vegetative	Loamy	Brown	28.17	11.57	46.27	29.37	Wanding Town	Huihuan Village	24.1194	98.0467	739
C092	HF_RS21	Tracheophyta	Magnoliopsida	Dipsacales	Viburnaceae	Sambucus	Sambucus adnata	Sunny	Skiophyte	Moist	Reserve	Herb	0-5cm	93.1	Vegetative	Loamy	Brown	33.33	13.2	52.8	22.14	Moli Rainforest	Moli Rainforest	24.116	97.9809	915
C034	XG_RS16	Tracheophyta	Magnoliopsida	Dipsacales	Viburnaceae	Sambucus	Sambucus javanica	Sunny	Skiophyte	Moist	Reserve	Herb	0-5cm	106.8	Vegetative	Loamy	Brown	31.67	12.67	50.67	21.33	Moli Rainforest	Moli Rainforest	24.1055	97.9818	840
C034	XG_RS18	Tracheophyta	Magnoliopsida	Dipsacales	Viburnaceae	Sambucus	Sambucus javanica	Sunny	Skiophyte	Moist	Reserve	Herb	0-5cm	104	Vegetative	Loamy	Brown	31.67	12.67	50.67	21.33	Moli Rainforest	Moli Rainforest	24.1055	97.9818	840
C034	XG_RS17	Tracheophyta	Magnoliopsida	Dipsacales	Viburnaceae	Sambucus	Sambucus javanica	Sunny	Skiophyte	Moist	Reserve	Herb	0-5cm	100.9	Vegetative	Loamy	Brown	31.67	12.67	50.67	21.33	Moli Rainforest	Moli Rainforest	24.1055	97.9818	840
T032	LR_RS15	Tracheophyta	Magnoliopsida	Dipsacales	Viburnaceae	Sambucus	Sambucus?javanica	Sunny	Skiophyte	Moist	Hillside	Herb	10-15cm	104	Vegetative	Loamy	Brown	27.6	11.37	45.47	23.16	Botanical Garden	Botanical Garden	24.0705	97.8177	1119
T032	LR_RS14	Tracheophyta	Magnoliopsida	Dipsacales	Viburnaceae	Sambucus	Sambucus?javanica	Sunny	Skiophyte	Moist	Hillside	Herb	10-15cm	102.7	Vegetative	Loamy	Brown	27.6	11.37	45.47	23.16	Botanical Garden	Botanical Garden	24.0705	97.8177	1119
T032	LR_RS13	Tracheophyta	Magnoliopsida	Dipsacales	Viburnaceae	Sambucus	Sambucus?javanica	Sunny	Skiophyte	Moist	Hillside	Herb	10-15cm	108.2	Vegetative	Loamy	Brown	27.6	11.37	45.47	23.16	Botanical Garden	Botanical Garden	24.0705	97.8177	1119
B137	ZF_RS21	Tracheophyta	Magnoliopsida	Dipsacales	Viburnaceae	Viburnum	Viburnum dilatatum	Sunny	Skiophyte	Moist	Hillside	Shrub (>2m)	0-5cm	111.5	Vegetative	Loamy	Brown	30.27	12.2	48.8	22.81	Botanical Garden	Botanical Garden	24.0686	97.8209	1072
B137	ZF_RS22	Tracheophyta	Magnoliopsida	Dipsacales	Viburnaceae	Viburnum	Viburnum dilatatum	Sunny	Skiophyte	Moist	Hillside	Shrub (>2m)	0-5cm	101.4	Vegetative	Loamy	Brown	30.27	12.2	48.8	22.81	Botanical Garden	Botanical Garden	24.0686	97.8209	1072
B137	ZF_RS23	Tracheophyta	Magnoliopsida	Dipsacales	Viburnaceae	Viburnum	Viburnum dilatatum	Sunny	Skiophyte	Moist	Hillside	Shrub (>2m)	0-5cm	107.9	Vegetative	Loamy	Brown	30.27	12.2	48.8	22.81	Botanical Garden	Botanical Garden	24.0686	97.8209	1072
E007	XC_RS16	Tracheophyta	Polypodiopsida	Equisetales	Equisetaceae	Equisetum	Equisetum arvense	Shower	Skiophyte	Moist	Hillside	Herb	0-5cm	62.8	Vegetative	Loamy	Brown					Botanical Garden	Botanical Garden	24.0706	97.8201	1073
T033	LR_RS18	Tracheophyta	Magnoliopsida	Ericales	Primulaceae	Ardisia	Ardisia japonica	Sunny	Skiophyte	Moist	Hillside	Shrub (<2m)	5-10cm	102.3	Vegetative	Loamy	Brown					Botanical Garden	Botanical Garden	24.0705	97.818	1118
T033	LR_RS16	Tracheophyta	Magnoliopsida	Ericales	Primulaceae	Ardisia	Ardisia japonica	Sunny	Skiophyte	Moist	Hillside	Shrub (<2m)	5-10cm	100.5	Vegetative	Loamy	Brown					Botanical Garden	Botanical Garden	24.0705	97.818	1118
T033	LR_RS17	Tracheophyta	Magnoliopsida	Ericales	Primulaceae	Ardisia	Ardisia japonica	Sunny	Skiophyte	Moist	Hillside	Shrub (<2m)	5-10cm	103.1	Vegetative	Loamy	Brown					Botanical Garden	Botanical Garden	24.0705	97.818	1118
B075	XF_RS06	Tracheophyta	Magnoliopsida	Ericales	Primulaceae	Ardisia	Ardisia polysticta	Sunny	Skiophyte	Moist	Hillside	Shrub (<2m)	5-10cm	108.6	Vegetative	Loamy	Brown	35.5	14	55.6	21.54	Botanical Garden	Botanical Garden	24.0715	97.8166	1120
T241	CD_RS23	Tracheophyta	Magnoliopsida	Ericales	Theaceae	Camellia	Camellia japonica	Sunny	Heliophyte	Moist	Park	Tree (<10m)	15-20cm	126.9	Flowering	Loamy	Brown	32.77	13.03	52.13	21.5	City Park	Nanmao Lake	24.0089	97.8719	720
T241	CD_RS24	Tracheophyta	Magnoliopsida	Ericales	Theaceae	Camellia	Camellia japonica	Sunny	Heliophyte	Moist	Park	Tree (<10m)	15-20cm	96.1	Flowering	Loamy	Brown	32.77	13.03	52.13	21.5	City Park	Nanmao Lake	24.0089	97.8719	720
T241	CD_RS22	Tracheophyta	Magnoliopsida	Ericales	Theaceae	Camellia	Camellia japonica	Sunny	Heliophyte	Moist	Park	Tree (<10m)	15-20cm	105.2	Flowering	Loamy	Brown	32.77	13.03	52.13	21.5	City Park	Nanmao Lake	24.0089	97.8719	720
T207	CB_RS18	Tracheophyta	Magnoliopsida	Ericales	Ebenaceae	Diospyros	Diospyros kerrii	Shower	Heliophyte	Moist	Park	Tree (<10m)	5-10cm	128.4	Vegetative	Loamy	Brown	27.07	11.2	44.8	24.16	City Park	Nanmao Lake	24.0112	97.8724	713
T207	CB_RS20	Tracheophyta	Magnoliopsida	Ericales	Ebenaceae	Diospyros	Diospyros kerrii	Shower	Heliophyte	Moist	Park	Tree (<10m)	5-10cm	122.8	Vegetative	Loamy	Brown	27.07	11.2	44.8	24.16	City Park	Nanmao Lake	24.0112	97.8724	713
T207	CB_RS19	Tracheophyta	Magnoliopsida	Ericales	Ebenaceae	Diospyros	Diospyros kerrii	Shower	Heliophyte	Moist	Park	Tree (<10m)	5-10cm	99.5	Vegetative	Loamy	Brown	27.07	11.2	44.8	24.16	City Park	Nanmao Lake	24.0112	97.8724	713
B132	ZF_RS15	Tracheophyta	Magnoliopsida	Ericales	Primulaceae	Embelia	Embelia ribes	Sunny	Skiophyte	Moist	Hillside	Shrub (<2m)	0-5cm	100.8	Vegetative	Loamy	Brown	33.7	13.33	53.33	19.81	Botanical Garden	Botanical Garden	24.0683	97.8206	1072
B131	ZF_RS14	Tracheophyta	Magnoliopsida	Ericales	Pentaphylacaceae	Eurya	Eurya groffii	Sunny	Skiophyte	Moist	Hillside	Tree (<10m)	10-15cm	128.3	Vegetative	Loamy	Brown	34.33	13.5	54	19.93	Botanical Garden	Botanical Garden	24.0682	97.8205	1072
C011	FE_RS12	Tracheophyta	Magnoliopsida	Ericales	Balsaminaceae	Impatiens	Impatiens balsamina	Sunny	Skiophyte	Moist	Reserve	Herb	0-5cm	102.8	Flowering	Loamy	Brown	30.93	12.43	49.73	18.23	Moli Rainforest	Moli Rainforest	24.1073	97.985	835
E032	KA_RS22	Tracheophyta	Magnoliopsida	Ericales	Balsaminaceae	Impatiens	Impatiens balsamina	Shower	Skiophyte	Moist	Hillside	Herb	0-5cm	101.4	Flowering	Loamy	Brown	27.63	11.37	45.47	18.2	Botanical Garden	Botanical Garden	24.0709	97.8197	1082
B135	ZF_RS18	Tracheophyta	Magnoliopsida	Ericales	Primulaceae	Maesa	Maesa perlarius	Sunny	Skiophyte	Moist	Hillside	Shrub (<2m)	5-10cm	119.7	Vegetative	Loamy	Brown	28.9	11.8	47.2	22.54	Botanical Garden	Botanical Garden	24.0686	97.8208	1072
B135	ZF_RS19	Tracheophyta	Magnoliopsida	Ericales	Primulaceae	Maesa	Maesa perlarius	Sunny	Skiophyte	Moist	Hillside	Shrub (<2m)	5-10cm	102.7	Vegetative	Loamy	Brown	28.9	11.8	47.2	22.54	Botanical Garden	Botanical Garden	24.0686	97.8208	1072
T028	LR_RS09	Tracheophyta	Magnoliopsida	Ericales	Ebenaceae	Rhododendron	Rhododendron amagianum	Sunny	Skiophyte	Moist	Hillside	Tree (<10m)	15-20cm	102.4	Vegetative	Loamy	Brown	28.77	11.73	46.93	24.56	Botanical Garden	Botanical Garden	24.0712	97.8178	1136
T028	LR_RS08	Tracheophyta	Magnoliopsida	Ericales	Ebenaceae	Rhododendron	Rhododendron amagianum	Sunny	Skiophyte	Moist	Hillside	Tree (<10m)	15-20cm	107.2	Vegetative	Loamy	Brown	28.77	11.73	46.93	24.56	Botanical Garden	Botanical Garden	24.0712	97.8178	1136
T028	LR_RS07	Tracheophyta	Magnoliopsida	Ericales	Ebenaceae	Rhododendron	Rhododendron amagianum	Sunny	Skiophyte	Moist	Hillside	Tree (<10m)	15-20cm	103.1	Vegetative	Loamy	Brown	28.77	11.73	46.93	24.56	Botanical Garden	Botanical Garden	24.0712	97.8178	1136
T316	CB_RS02	Tracheophyta	Magnoliopsida	Ericales	Ericaceae	Rhododendron	Rhododendron simsii	Sunny	Skiophyte	Moist	Reserve	Shrub (<2m)	10-15cm	77.1	Flowering	Loamy	Brown	27.7	11.4	45.6	23.79	Moli Rainforest	Moli Rainforest	24.1112	97.9859	832
T404	LD_RS19	Tracheophyta	Magnoliopsida	Ericales	Ericaceae	Rhododendron	Rhododendron simsii	Sunny	Heliophyte	Dry	Park	Shrub (<2m)	0-5cm	77.6	Flowering	Loamy	Brown	20.43	9.13	36.53	18.91	City Park	Longmo Lake	24.0006	97.8347	730
T404	LD_RS21	Tracheophyta	Magnoliopsida	Ericales	Ericaceae	Rhododendron	Rhododendron simsii	Sunny	Heliophyte	Dry	Park	Shrub (<2m)	0-5cm	80.3	Flowering	Loamy	Brown	20.43	9.13	36.53	18.91	City Park	Longmo Lake	24.0006	97.8347	730
T404	LD_RS20	Tracheophyta	Magnoliopsida	Ericales	Ericaceae	Rhododendron	Rhododendron simsii	Sunny	Heliophyte	Dry	Park	Shrub (<2m)	0-5cm	69.8	Flowering	Loamy	Brown	20.43	9.13	36.53	18.91	City Park	Longmo Lake	24.0006	97.8347	730
E073	XD_RS09	Tracheophyta	Magnoliopsida	Ericales	Sapotaceae	Sarcosperma	Sarcosperma laurinum	Shower	Skiophyte	Moist	Hillside	Tree (<10m)	0-5cm	57.4	Vegetative	Loamy	Brown	34.13	13.43	53.73	15.31	Botanical Garden	Botanical Garden	24.0705	97.8181	1111
B085	XF_RS19	Tracheophyta	Magnoliopsida	Ericales	Actinidiaceae	Saurauia	Saurauia tristyla	Sunny	Skiophyte	Moist	Hillside	Tree (<10m)	5-10cm	101.1	Vegetative	Loamy	Brown	33.47	13.27	53.07	21.93	Botanical Garden	Botanical Garden	24.0714	97.8177	1152
T226	FB_RS03	Tracheophyta	Magnoliopsida	Fabales	Fabaceae	Acacia	Acacia mangium	Sunny	Heliophyte	Moist	Park	Tree (>10m)	0-5cm	102.1	Vegetative	Loamy	Brown	30.87	12.43	49.73	29.37	City Park	Nanmao Lake	24.0116	97.872	730
T226	FB_RS02	Tracheophyta	Magnoliopsida	Fabales	Fabaceae	Acacia	Acacia mangium	Sunny	Heliophyte	Moist	Park	Tree (>10m)	0-5cm	109.3	Vegetative	Loamy	Brown	30.87	12.43	49.73	29.37	City Park	Nanmao Lake	24.0116	97.872	730
T226	FB_RS01	Tracheophyta	Magnoliopsida	Fabales	Fabaceae	Acacia	Acacia mangium	Sunny	Heliophyte	Moist	Park	Tree (>10m)	0-5cm	101.1	Vegetative	Loamy	Brown	30.87	12.43	49.73	29.37	City Park	Nanmao Lake	24.0116	97.872	730
F101	LH_RS20	Tracheophyta	Magnoliopsida	Fabales	Fabaceae	Acacia	Acacia sp. MR-2013	Sunny	Skiophyte	Moist	Hillside		5-10cm	89.9	Vegetative	Loamy	Red	35.8	13.97	55.87	25.37	Wanding Town	Wanding Forest Park	24.0872	98.0739	893
T387	ZC_RS08	Tracheophyta	Magnoliopsida	Fabales	Fabaceae	Acacia	Acacia unassigned	Sunny	Heliophyte	Moist	Park	Tree (<10m)	0-5cm	127.4	Fruiting	Loamy	Brown					City Park	Longmo Lake	24.0022	97.8433	730
T096	LK_RS02	Tracheophyta	Magnoliopsida	Fabales	Fabaceae	Adenanthera	Adenanthera microsperma	Sunny	Heliophyte	Moist	Park	Tree (<10m)	10-15cm	102.6	Vegetative	Loamy	Brown	39.63	15.17	60.67	22.06	City Park	Nanmao Lake	24.0091	97.8708	719
T096	LJ_RS21	Tracheophyta	Magnoliopsida	Fabales	Fabaceae	Adenanthera	Adenanthera microsperma	Sunny	Heliophyte	Moist	Park	Tree (<10m)	10-15cm	78.6	Vegetative	Loamy	Brown	39.63	15.17	60.67	22.06	City Park	Nanmao Lake	24.0091	97.8708	719
T096	ZE_RS06	Tracheophyta	Magnoliopsida	Fabales	Fabaceae	Adenanthera	Adenanthera microsperma	Sunny	Heliophyte	Moist	Park	Tree (<10m)	10-15cm	104.6	Vegetative	Loamy	Brown	39.63	15.17	60.67	22.06	City Park	Nanmao Lake	24.0091	97.8708	719
C048	FD_RS12	Tracheophyta	Magnoliopsida	Fabales	Fabaceae	Albizia	Albizia chinensis	Sunny	Heliophyte	Moist	Reserve	Tree (>10m)	0-5cm	107.8	Vegetative	Loamy	Brown					Moli Rainforest	Moli Rainforest	24.1051	97.9808	842
C048	FD_RS13	Tracheophyta	Magnoliopsida	Fabales	Fabaceae	Albizia	Albizia chinensis	Sunny	Heliophyte	Moist	Reserve	Tree (>10m)	0-5cm	58.6	Vegetative	Loamy	Brown					Moli Rainforest	Moli Rainforest	24.1051	97.9808	842
C048	FD_RS14	Tracheophyta	Magnoliopsida	Fabales	Fabaceae	Albizia	Albizia chinensis	Sunny	Heliophyte	Moist	Reserve	Tree (>10m)	0-5cm	47.7	Vegetative	Loamy	Brown					Moli Rainforest	Moli Rainforest	24.1051	97.9808	842
T248	XJ_RS24	Tracheophyta	Magnoliopsida	Fabales	Fabaceae	Albizia	Albizia chinensis	Sunny	Heliophyte	Moist	Reserve	Tree (>10m)	0-5cm	93.5	Vegetative	Loamy	Brown					Moli Rainforest	Moli Rainforest	24.1087	97.9873	812
T248	XJ_RS23	Tracheophyta	Magnoliopsida	Fabales	Fabaceae	Albizia	Albizia chinensis	Sunny	Heliophyte	Moist	Reserve	Tree (>10m)	0-5cm	100	Vegetative	Loamy	Brown					Moli Rainforest	Moli Rainforest	24.1087	97.9873	812
T248	XJ_RS22	Tracheophyta	Magnoliopsida	Fabales	Fabaceae	Albizia	Albizia chinensis	Sunny	Heliophyte	Moist	Reserve	Tree (>10m)	0-5cm	72.5	Vegetative	Loamy	Brown					Moli Rainforest	Moli Rainforest	24.1087	97.9873	812
L001	LP_RS16	Tracheophyta	Magnoliopsida	Fabales	Fabaceae	Arachis	Arachis duranensis	Sunny	Heliophyte	Moist	Hillside	Herb	0-5cm	90.7	Flowering	Loamy	Brown	24.73	10.43	41.73	26.52	Botanical Garden	Jingcheng Ariport	24.0684	97.8166	1106
L001	LP_RS15	Tracheophyta	Magnoliopsida	Fabales	Fabaceae	Arachis	Arachis duranensis	Sunny	Heliophyte	Moist	Hillside	Herb	0-5cm	88.4	Flowering	Loamy	Brown	24.73	10.43	41.73	26.52	Botanical Garden	Jingcheng Ariport	24.0684	97.8166	1106
L001	LP_RS14	Tracheophyta	Magnoliopsida	Fabales	Fabaceae	Arachis	Arachis duranensis	Sunny	Heliophyte	Moist	Hillside	Herb	0-5cm	99.8	Flowering	Loamy	Brown	24.73	10.43	41.73	26.52	Botanical Garden	Jingcheng Ariport	24.0684	97.8166	1106
L011	LT_RS14	Tracheophyta	Magnoliopsida	Fabales	Fabaceae	Arachis	Arachis hypogaea	Sunny	Heliophyte	Moist	Hillside		0-5cm	127.6	Vegetative	Loamy	Brown	32.57	12.97	51.87	26.79	Wanding Town	Huihuan River	24.1289	98.0503	738
B128	KC_RS02	Tracheophyta	Magnoliopsida	Fabales	Fabaceae	Archidendron	Archidendron clypearia	Sunny	Heliophyte	Moist	Hillside	Tree (>10m)	5-10cm	188.4	Vegetative	Loamy	Brown	38.5	14.87	59.47	25.37	Botanical Garden	Botanical Garden	24.0681	97.8202	1072
B128	XF_RS24	Tracheophyta	Magnoliopsida	Fabales	Fabaceae	Archidendron	Archidendron clypearia	Sunny	Heliophyte	Moist	Hillside	Tree (>10m)	5-10cm	79.4	Vegetative	Loamy	Brown	38.5	14.87	59.47	25.37	Botanical Garden	Botanical Garden	24.0681	97.8202	1072
B128	KC_RS18	Tracheophyta	Magnoliopsida	Fabales	Fabaceae	Archidendron	Archidendron clypearia	Sunny	Heliophyte	Moist	Hillside	Tree (>10m)	5-10cm	103.6	Vegetative	Loamy	Brown	38.5	14.87	59.47	25.37	Botanical Garden	Botanical Garden	24.0681	97.8202	1072
T208	CB_RS23	Tracheophyta	Magnoliopsida	Fabales	Fabaceae	Archidendron	Archidendron dalatense	Shower	Skiophyte	Moist	Park	Tree (<10m)	0-5cm	107.4	Flowering	Loamy	Brown	34.07	13.77	53.73	24.66	City Park	Nanmao Lake	24.0111	97.8724	713
T107	LK_RS13	Tracheophyta	Magnoliopsida	Fabales	Fabaceae	Bauhinia	Bauhinia blakeana	Sunny	Heliophyte	Moist	Park	Tree (<10m)	5-10cm	110.8	Fruiting	Loamy	Red	27.33	11.3	45.2	18.33	City Park	Nanmao Lake	24.0095	97.8707	733
T107	LK_RS12	Tracheophyta	Magnoliopsida	Fabales	Fabaceae	Bauhinia	Bauhinia blakeana	Sunny	Heliophyte	Moist	Park	Tree (<10m)	5-10cm	102.9	Fruiting	Loamy	Red	27.33	11.3	45.2	18.33	City Park	Nanmao Lake	24.0095	97.8707	733
T107	LK_RS11	Tracheophyta	Magnoliopsida	Fabales	Fabaceae	Bauhinia	Bauhinia blakeana	Sunny	Heliophyte	Moist	Park	Tree (<10m)	5-10cm	102.6	Fruiting	Loamy	Red	27.33	11.3	45.2	18.33	City Park	Nanmao Lake	24.0095	97.8707	733
T363	ZB_RS22	Tracheophyta	Magnoliopsida	Fabales	Fabaceae	Bauhinia	Bauhinia blakeana	Sunny	Heliophyte	Moist	Park	Tree (<10m)	5-10cm	124.8	Fruiting	Loamy	Brown	23.03	9.93	39.73	22.29	City Park	Longmo Lake	23.9989	97.8396	730
T363	ZB_RS20	Tracheophyta	Magnoliopsida	Fabales	Fabaceae	Bauhinia	Bauhinia blakeana	Sunny	Heliophyte	Moist	Park	Tree (<10m)	5-10cm	118.4	Fruiting	Loamy	Brown	23.03	9.93	39.73	22.29	City Park	Longmo Lake	23.9989	97.8396	730
T363	ZB_RS21	Tracheophyta	Magnoliopsida	Fabales	Fabaceae	Bauhinia	Bauhinia blakeana	Sunny	Heliophyte	Moist	Park	Tree (<10m)	5-10cm	115.8	Fruiting	Loamy	Brown	23.03	9.93	39.73	22.29	City Park	Longmo Lake	23.9989	97.8396	730
T069	XB_RS01	Tracheophyta	Magnoliopsida	Fabales	Fabaceae	Bauhinia	Bauhinia variegata	Sunny	Heliophyte	Moist	Hillside	Tree (<10m)	10-15cm	162.2	Vegetative	Loamy	Brown	27.03	11.2	44.8	26.91	Wanding Town	Huihuan River	24.1284	98.0517	738
T069	LV_RS17	Tracheophyta	Magnoliopsida	Fabales	Fabaceae	Bauhinia	Bauhinia variegata	Sunny	Heliophyte	Moist	Hillside	Tree (<10m)	10-15cm	102	Vegetative	Loamy	Brown	27.03	11.2	44.8	26.91	Wanding Town	Huihuan River	24.1284	98.0517	738
T069	LV_RS16	Tracheophyta	Magnoliopsida	Fabales	Fabaceae	Bauhinia	Bauhinia variegata	Sunny	Heliophyte	Moist	Hillside	Tree (<10m)	10-15cm	96.9	Vegetative	Loamy	Brown	27.03	11.2	44.8	26.91	Wanding Town	Huihuan River	24.1284	98.0517	738
T391	ZC_RS18	Tracheophyta	Magnoliopsida	Fabales	Fabaceae	Biancaea	Biancaea sappan	Sunny	Heliophyte	Moist	Park	Tree (<10m)	5-10cm	49.3	Fruiting	Loamy	Red					City Park	Longmo Lake	24.0011	97.842	730
T391	ZC_RS17	Tracheophyta	Magnoliopsida	Fabales	Fabaceae	Biancaea	Biancaea sappan	Sunny	Heliophyte	Moist	Park	Tree (<10m)	5-10cm	114.3	Fruiting	Loamy	Red					City Park	Longmo Lake	24.0011	97.842	730
T391	ZC_RS16	Tracheophyta	Magnoliopsida	Fabales	Fabaceae	Biancaea	Biancaea sappan	Sunny	Heliophyte	Moist	Park	Tree (<10m)	5-10cm	110.5	Fruiting	Loamy	Red					City Park	Longmo Lake	24.0011	97.842	730
A021	HB_RS03	Tracheophyta	Magnoliopsida	Fabales	Fabaceae	Calliandra	Calliandra haematocephala	Sunny	Skiophyte	Moist	Hillside	Shrub (>2m)	5-10cm	101.7	Flowering	Loamy	Brown	26.57	11.03	44.13	26.33	Botanical Garden	Botanical Garden	24.0694	97.8203	1096
T128	LG_RS12	Tracheophyta	Magnoliopsida	Fabales	Fabaceae	Calliandra	Calliandra haematocephala	Sunny	Heliophyte	Moist	Park	Shrub (>2m)	5-10cm	101.7	Flowering	Loamy	Brown	41.13	15.87	62.8	28.22	City Park	Nanmao Lake	24.0099	97.8735	721
T128	LG_RS09	Tracheophyta	Magnoliopsida	Fabales	Fabaceae	Calliandra	Calliandra haematocephala	Sunny	Heliophyte	Moist	Park	Shrub (>2m)	5-10cm	100.9	Flowering	Loamy	Brown	41.13	15.87	62.8	28.22	City Park	Nanmao Lake	24.0099	97.8735	721
T128	LF_RS02	Tracheophyta	Magnoliopsida	Fabales	Fabaceae	Calliandra	Calliandra haematocephala	Sunny	Heliophyte	Moist	Park	Shrub (>2m)	5-10cm	94.7	Flowering	Loamy	Brown	41.13	15.87	62.8	28.22	City Park	Nanmao Lake	24.0099	97.8735	721
T128	LG_RS24	Tracheophyta	Magnoliopsida	Fabales	Fabaceae	Calliandra	Calliandra haematocephala	Sunny	Heliophyte	Moist	Park	Shrub (>2m)	5-10cm	97.2	Flowering	Loamy	Brown	41.13	15.87	62.8	28.22	City Park	Nanmao Lake	24.0099	97.8735	721
T319	CB_RS01	Tracheophyta	Magnoliopsida	Fabales	Fabaceae	Calliandra	Calliandra haematocephala	Sunny	Skiophyte	Moist	Reserve	Shrub (>2m)	5-10cm	121.5	Flowering	Loamy	Brown	38.9	14.97	59.87	23.33	Moli Rainforest	Moli Rainforest	24.1114	97.9862	831
T341	ZB_RS09	Tracheophyta	Magnoliopsida	Fabales	Fabaceae	Calliandra	Calliandra haematocephala	Sunny	Heliophyte	Moist	Park	Shrub (<2m)	0-5cm	22.1	Flowering	Loamy	Brown	28.33	11.97	47.87	28.14	City Park	Longmo Lake	24.0024	97.8421	730
B024	KD_RS14	Tracheophyta	Magnoliopsida	Fabales	Fabaceae	Cassia	Cassia fistula	Sunny	Heliophyte	Moist	Hillside	Tree (>10m)	0-5cm	29.2	Vegetative	Sandy	Yellow	29.17	11.87	47.47	21.81	Botanical Garden	Botanical Garden	24.0694	97.8194	1116
B024	KD_RS17	Tracheophyta	Magnoliopsida	Fabales	Fabaceae	Cassia	Cassia fistula	Sunny	Heliophyte	Moist	Hillside	Tree (>10m)	0-5cm	22.8	Vegetative	Sandy	Yellow	29.17	11.87	47.47	21.81	Botanical Garden	Botanical Garden	24.0694	97.8194	1116
B024	HE_RS20	Tracheophyta	Magnoliopsida	Fabales	Fabaceae	Cassia	Cassia fistula	Sunny	Heliophyte	Moist	Hillside	Tree (>10m)	0-5cm	15.2	Vegetative	Sandy	Yellow	29.17	11.87	47.47	21.81	Botanical Garden	Botanical Garden	24.0694	97.8194	1116
T157	FH_RS03	Tracheophyta	Magnoliopsida	Fabales	Fabaceae	Cassia	Cassia fistula	Sunny	Heliophyte	Dry	Park	Tree (<10m)	5-10cm	96.8	Vegetative	Loamy	Brown	27.93	11.47	47.53	27.56	City Park	Nanmao Lake	24.0109	97.8716	726
T355	LD_RS10	Tracheophyta	Magnoliopsida	Fabales	Fabaceae	Cassia	Cassia fistula	Sunny	Heliophyte	Moist	Park	Tree (<10m)	5-10cm	106.2	Fruiting	Loamy	Brown	26.7	11.1	44.4	26.56	City Park	Longmo Lake	24.0028	97.842	730
T074	XB_RS13	Tracheophyta	Magnoliopsida	Fabales	Fabaceae	Crotalaria	Crotalaria pallida	Sunny	Heliophyte	Dry	Beach	Herb	10-15cm	21.3	Fruiting	Sandy	Yellow	28.87	11.83	47.2	27.85	Wanding Town	Huihuan Beach	24.1289	98.0503	738
T074	XB_RS11	Tracheophyta	Magnoliopsida	Fabales	Fabaceae	Crotalaria	Crotalaria pallida	Sunny	Heliophyte	Dry	Beach	Herb	10-15cm	132.5	Fruiting	Sandy	Yellow	28.87	11.83	47.2	27.85	Wanding Town	Huihuan Beach	24.1289	98.0503	738
T074	XB_RS12	Tracheophyta	Magnoliopsida	Fabales	Fabaceae	Crotalaria	Crotalaria pallida	Sunny	Heliophyte	Dry	Beach	Herb	10-15cm	149	Fruiting	Sandy	Yellow	28.87	11.83	47.2	27.85	Wanding Town	Huihuan Beach	24.1289	98.0503	738
T110	KJ_RS01	Tracheophyta	Magnoliopsida	Fabales	Fabaceae	Crotalaria	Crotalaria pallida	Sunny	Skiophyte	Moist	Park	Herb	5-10cm	74	Flowering	Loamy	Brown	26.1	10.9	43.6	20.16	City Park	Nanmao Lake	24.0094	97.8701	733
T110	KJ_RS02	Tracheophyta	Magnoliopsida	Fabales	Fabaceae	Crotalaria	Crotalaria pallida	Sunny	Skiophyte	Moist	Park	Herb	5-10cm	61.3	Flowering	Loamy	Brown	26.1	10.9	43.6	20.16	City Park	Nanmao Lake	24.0094	97.8701	733
T110	KJ_RS03	Tracheophyta	Magnoliopsida	Fabales	Fabaceae	Crotalaria	Crotalaria pallida	Sunny	Skiophyte	Moist	Park	Herb	5-10cm	79.4	Flowering	Loamy	Brown	26.1	10.9	43.6	20.16	City Park	Nanmao Lake	24.0094	97.8701	733
T340	ZB_RS24	Tracheophyta	Magnoliopsida	Fabales	Fabaceae	Crotalaria	Crotalaria pallida	Sunny	Heliophyte	Moist	Park	Herb	0-5cm	45.1	Flowering	Loamy	Red	25.3	10.67	42.67	26.93	City Park	Longmo Lake	24.0023	97.8422	730
T340	ZB_RS08	Tracheophyta	Magnoliopsida	Fabales	Fabaceae	Crotalaria	Crotalaria pallida	Sunny	Heliophyte	Moist	Park	Herb	0-5cm	30.1	Flowering	Loamy	Red	25.3	10.67	42.67	26.93	City Park	Longmo Lake	24.0023	97.8422	730
C049	FD_RS23	Tracheophyta	Magnoliopsida	Fabales	Fabaceae	Dalbergia	Dalbergia assamica	Sunny	Heliophyte	Moist	Reserve	Tree (>10m)	0-5cm	120.7	Vegetative	Loamy	Brown					Moli Rainforest	Moli Rainforest	24.1051	97.9808	842
T246	XJ_RS17	Tracheophyta	Magnoliopsida	Fabales	Fabaceae	Dalbergia	Dalbergia assamica	Sunny	Heliophyte	Moist	Reserve	Tree (>10m)	0-5cm	54.4	Vegetative	Loamy	Brown					Moli Rainforest	Moli Rainforest	24.1087	97.9873	812
T246	XJ_RS16	Tracheophyta	Magnoliopsida	Fabales	Fabaceae	Dalbergia	Dalbergia assamica	Sunny	Heliophyte	Moist	Reserve	Tree (>10m)	0-5cm	64.8	Vegetative	Loamy	Brown					Moli Rainforest	Moli Rainforest	24.1087	97.9873	812
T246	XJ_RS18	Tracheophyta	Magnoliopsida	Fabales	Fabaceae	Dalbergia	Dalbergia assamica	Sunny	Heliophyte	Moist	Reserve	Tree (>10m)	0-5cm	10.7	Vegetative	Loamy	Brown					Moli Rainforest	Moli Rainforest	24.1087	97.9873	812
T206	CB_RS11	Tracheophyta	Magnoliopsida	Fabales	Fabaceae	Dalbergia	Dalbergia cochinchinensis	Shower	Heliophyte	Moist	Park	Tree (<10m)	5-10cm	107.5	Vegetative	Loamy	Brown	34.3	13.53	54.13	25.43	City Park	Nanmao Lake	24.0112	97.8726	730
T025	LR_RS02	Tracheophyta	Magnoliopsida	Fabales	Fabaceae	Dalbergia	Dalbergia cultrata	Sunny	Skiophyte	Moist	Hillside	Tree (<10m)	5-10cm	104.2	Vegetative	Loamy	Brown	29.43	11.93	47.73	21.87	Botanical Garden	Botanical Garden	24.0693	97.8206	1111
T210	FJ_RS23	Tracheophyta	Magnoliopsida	Fabales	Fabaceae	Dalbergia	Dalbergia cultrata	Sunny	Heliophyte	Moist	Park	Tree (<10m)	5-10cm	121.5	Vegetative	Loamy	Brown	31.43	12.57	50.27	23.52	City Park	Nanmao Lake	24.0112	97.8726	730
T210	FJ_RS24	Tracheophyta	Magnoliopsida	Fabales	Fabaceae	Dalbergia	Dalbergia cultrata	Sunny	Heliophyte	Moist	Park	Tree (<10m)	5-10cm	98.9	Vegetative	Loamy	Brown	31.43	12.57	50.27	23.52	City Park	Nanmao Lake	24.0112	97.8726	730
T210	FJ_RS19	Tracheophyta	Magnoliopsida	Fabales	Fabaceae	Dalbergia	Dalbergia cultrata	Sunny	Heliophyte	Moist	Park	Tree (<10m)	5-10cm	66.1	Vegetative	Loamy	Brown	31.43	12.57	50.27	23.52	City Park	Nanmao Lake	24.0112	97.8726	730
E087	XD_RS20	Tracheophyta	Magnoliopsida	Fabales	Fabaceae	Dalbergia	Dalbergia hupeana	Shower	Skiophyte	Moist	Hillside	Tree (<10m)	10-15cm	68.9	Vegetative	Loamy	Brown	22.13	9.67	38.67	16.66	Botanical Garden	Botanical Garden	24.0705	97.8172	1111
T026	LR_RS03	Tracheophyta	Magnoliopsida	Fabales	Fabaceae	Dalbergia	Dalbergia obtusifolia	Sunny	Skiophyte	Moist	Hillside	Tree (<10m)	5-10cm	58.7	Vegetative	Loamy	Brown	26.5	11	44	22.43	Botanical Garden	Botanical Garden	24.071	97.8185	1110
T230	FB_RS12	Tracheophyta	Magnoliopsida	Fabales	Fabaceae	Dalbergia	Dalbergia odorifera	Sunny	Heliophyte	Moist	Park	Tree (<10m)		74.4	Vegetative	Loamy	Brown	37.23	14.43	57.73	29.68	City Park	Nanmao Lake	24.0115	97.8718	730
T402	LD_RS16	Tracheophyta	Magnoliopsida	Fabales	Fabaceae	Dalbergia	Dalbergia odorifera	Sunny	Heliophyte	Moist	Park	Tree (<10m)	5-10cm	102.4	Flowering	Loamy	Red	34.2	13.47	53.87	17.99	City Park	Longmo Lake	24.0008	97.8346	730
T402	LD_RS15	Tracheophyta	Magnoliopsida	Fabales	Fabaceae	Dalbergia	Dalbergia odorifera	Sunny	Heliophyte	Moist	Park	Tree (<10m)	5-10cm	107.3	Flowering	Loamy	Red	34.2	13.47	53.87	17.99	City Park	Longmo Lake	24.0008	97.8346	730
T402	LD_RS17	Tracheophyta	Magnoliopsida	Fabales	Fabaceae	Dalbergia	Dalbergia odorifera	Sunny	Heliophyte	Moist	Park	Tree (<10m)	5-10cm	102.7	Flowering	Loamy	Red	34.2	13.47	53.87	17.99	City Park	Longmo Lake	24.0008	97.8346	730
T405	LD_RS22	Tracheophyta	Magnoliopsida	Fabales	Fabaceae	Dalbergia	Dalbergia odorifera	Sunny	Heliophyte	Dry	Park	Tree (<10m)	5-10cm	102.3	Vegetative	Loamy	Brown	26.43	11.03	44.13	20.41	City Park	Longmo Lake	24.0003	97.8358	730
T097	ZE_RS07	Tracheophyta	Magnoliopsida	Fabales	Fabaceae	Dalbergia	Dalbergia sissoo	Sunny	Heliophyte	Moist	Park	Tree (<10m)	5-10cm	102.6	Vegetative	Loamy	Brown	29.3	11.9	47.6	22.27	City Park	Nanmao Lake	24.0089	97.8726	719
T097	LJ_RS18	Tracheophyta	Magnoliopsida	Fabales	Fabaceae	Dalbergia	Dalbergia sissoo	Sunny	Heliophyte	Moist	Park	Tree (<10m)	5-10cm	99.8	Vegetative	Loamy	Brown	29.3	11.9	47.6	22.27	City Park	Nanmao Lake	24.0089	97.8726	719
T097	LJ_RS24	Tracheophyta	Magnoliopsida	Fabales	Fabaceae	Dalbergia	Dalbergia sissoo	Sunny	Heliophyte	Moist	Park	Tree (<10m)	5-10cm	101.2	Vegetative	Loamy	Brown	29.3	11.9	47.6	22.27	City Park	Nanmao Lake	24.0089	97.8726	719
B031	ZH_RS10	Tracheophyta	Magnoliopsida	Fabales	Fabaceae	Dalbergia	Dalbergia stipulacea	Sunny	Skiophyte	Moist	Hillside	Tree (<10m)	0-5cm	101.2	Vegetative	Loamy	Brown	38.13	14.7	58.8	21.08	Botanical Garden	Botanical Garden	24.0694	97.8191	1112
T362	ZB_RS18	Tracheophyta	Magnoliopsida	Fabales	Fabaceae	Delonix	Delonix regia	Sunny	Heliophyte	Moist	Park	Tree (<10m)	15-20cm	25.2	Fruiting	Loamy	Brown					City Park	Longmo Lake	23.999	97.8396	730
T362	ZB_RS19	Tracheophyta	Magnoliopsida	Fabales	Fabaceae	Delonix	Delonix regia	Sunny	Heliophyte	Moist	Park	Tree (<10m)	15-20cm	39.8	Fruiting	Loamy	Brown					City Park	Longmo Lake	23.999	97.8396	730
T060	LS_RS23	Tracheophyta	Magnoliopsida	Fabales	Fabaceae	Dendrolobium	Dendrolobium triangulare	Sunny	Heliophyte	Moist	Hillside	Shrub (<2m)	5-10cm	66.4	Vegetative	Loamy	Brown	25.53	10.7	42.8	28.18	Wanding Town	Huihuan River	24.1273	98.0516	738
T060	LS_RS24	Tracheophyta	Magnoliopsida	Fabales	Fabaceae	Dendrolobium	Dendrolobium triangulare	Sunny	Heliophyte	Moist	Hillside	Shrub (<2m)	5-10cm	111.5	Vegetative	Loamy	Brown	25.53	10.7	42.8	28.18	Wanding Town	Huihuan River	24.1273	98.0516	738
T060	XA_RS18	Tracheophyta	Magnoliopsida	Fabales	Fabaceae	Dendrolobium	Dendrolobium triangulare	Sunny	Heliophyte	Moist	Hillside	Shrub (<2m)	5-10cm	29.6	Vegetative	Loamy	Brown	25.53	10.7	42.8	28.18	Wanding Town	Huihuan River	24.1273	98.0516	738
C010	HF_RS17	Tracheophyta	Magnoliopsida	Fabales	Fabaceae	Derris	Derris trifoliata	Sunny	Skiophyte	Moist	Reserve	Shrub (<2m)	5-10cm	105.4	Vegetative	Loamy	Brown	34.8	13.67	54.67	17.6	Moli Rainforest	Moli Rainforest	24.1073	97.9852	835
C010	HF_RS16	Tracheophyta	Magnoliopsida	Fabales	Fabaceae	Derris	Derris trifoliata	Sunny	Skiophyte	Moist	Reserve	Shrub (<2m)	5-10cm	103.6	Vegetative	Loamy	Brown	34.8	13.67	54.67	17.6	Moli Rainforest	Moli Rainforest	24.1073	97.9852	835
C010	HF_RS15	Tracheophyta	Magnoliopsida	Fabales	Fabaceae	Derris	Derris trifoliata	Sunny	Skiophyte	Moist	Reserve	Shrub (<2m)	5-10cm	76.7	Vegetative	Loamy	Brown	34.8	13.67	54.67	17.6	Moli Rainforest	Moli Rainforest	24.1073	97.9852	835
T369	LC_RS22	Tracheophyta	Magnoliopsida	Fabales	Fabaceae	Erythrina	Erythrina crista-galli	Sunny	Heliophyte	Moist	Park		0-5cm	106.5	Vegetative	Loamy	Red	20.97	9.27	37.27	21.29	City Park	Longmo Lake	23.9988	97.8395	730
T372	ZC_RS03	Tracheophyta	Magnoliopsida	Fabales	Fabaceae	Erythrina	Erythrina crista-galli	Sunny	Heliophyte	Moist	Park	Tree (<10m)	5-10cm	104.9	Vegetative	Loamy	Red	27.9	11.47	45.87	25.87	City Park	Longmo Lake	24.0038	97.8434	730
T372	ZC_RS01	Tracheophyta	Magnoliopsida	Fabales	Fabaceae	Erythrina	Erythrina crista-galli	Sunny	Heliophyte	Moist	Park	Tree (<10m)	5-10cm	129.7	Vegetative	Loamy	Red	27.9	11.47	45.87	25.87	City Park	Longmo Lake	24.0038	97.8434	730
T372	ZC_RS02	Tracheophyta	Magnoliopsida	Fabales	Fabaceae	Erythrina	Erythrina crista-galli	Sunny	Heliophyte	Moist	Park	Tree (<10m)	5-10cm	74.9	Vegetative	Loamy	Red	27.9	11.47	45.87	25.87	City Park	Longmo Lake	24.0038	97.8434	730
T373	ZC_RS04	Tracheophyta	Magnoliopsida	Fabales	Fabaceae	Erythrina	Erythrina crista-galli	Sunny	Heliophyte	Moist	Park	Tree (<10m)	5-10cm	60.6	Vegetative	Loamy	Red	22.43	9.73	38.93	27.02	City Park	Longmo Lake	24.0038	97.8434	730
T250	FK_RS07	Tracheophyta	Magnoliopsida	Fabales	Fabaceae	Erythrina	Erythrina stricta	Sunny	Heliophyte	Moist	Reserve	Tree (<10m)	0-5cm	103.1	Vegetative	Loamy	Brown					Moli Rainforest	Moli Rainforest	24.1088	97.9872	812
L009	LT_RS12	Tracheophyta	Magnoliopsida	Fabales	Fabaceae	Flemingia	Flemingia unassigned	Sunny	Heliophyte	Moist	Hillside	Shrub (<2m)	0-5cm	51.3	Vegetative	Loamy	Brown	27.73	11.43	45.73	21.75	Wanding Town	Huihuan Village	24.1197	98.0462	750
T331	LD_RS01	Tracheophyta	Magnoliopsida	Fabales	Fabaceae	Glycine	Glycine soja	Sunny	Heliophyte	Moist	Park	Herb	5-10cm	53.8	Flowering	Loamy	Brown	19.87	8.93	35.73	20.58	City Park	Longmo Lake	24.0024	97.8429	730
L006	LT_RS06	Tracheophyta	Magnoliopsida	Fabales	Fabaceae	Grona	Grona heterocarpos	Sunny	Heliophyte	Moist	Hillside	Shrub (<2m)	5-10cm	119.4	Fruiting	Loamy	Brown	19.67	8.87	35.47	22.35	Wanding Town	Huihuan Village	24.1199	98.0462	750
L006	LT_RS05	Tracheophyta	Magnoliopsida	Fabales	Fabaceae	Grona	Grona heterocarpos	Sunny	Heliophyte	Moist	Hillside	Shrub (<2m)	5-10cm	101	Fruiting	Loamy	Brown	19.67	8.87	35.47	22.35	Wanding Town	Huihuan Village	24.1199	98.0462	750
L006	LT_RS04	Tracheophyta	Magnoliopsida	Fabales	Fabaceae	Grona	Grona heterocarpos	Sunny	Heliophyte	Moist	Hillside	Shrub (<2m)	5-10cm	103.4	Fruiting	Loamy	Brown	19.67	8.87	35.47	22.35	Wanding Town	Huihuan Village	24.1199	98.0462	750
T324	LC_RS05	Tracheophyta	Magnoliopsida	Fabales	Fabaceae	Grona	Grona heterocarpos	Sunny	Heliophyte	Moist	Park	Shrub (<2m)	5-10cm	104.3	Flowering	Loamy	Brown	16.97	8	32	18.62	City Park	Longmo Lake	24.0029	97.8431	730
C081	XH_RS24	Tracheophyta	Magnoliopsida	Fabales	Fabaceae	Harashuteria	Harashuteria hirsuta	Sunny	Skiophyte	Moist	Reserve		0-5cm	76.4	Vegetative	Loamy	Brown	32.6	12.97	51.87	19.6	Moli Rainforest	Moli Rainforest	24.1142	97.9826	900
D003	LU_RS02	Tracheophyta	Magnoliopsida	Fabales	Fabaceae	Hylodesmum	Hylodesmum podocarpum	Sunny	Skiophyte	Moist	Hillside	Herb	0-5cm	105.7	Flowering	Loamy	Brown	34.3	13.5	54	17.37	Botanical Garden	Botanical Garden	24.0685	97.8213	1094
D003	LU_RS04	Tracheophyta	Magnoliopsida	Fabales	Fabaceae	Hylodesmum	Hylodesmum podocarpum	Sunny	Skiophyte	Moist	Hillside	Herb	0-5cm	96.8	Flowering	Loamy	Brown	34.3	13.5	54	17.37	Botanical Garden	Botanical Garden	24.0685	97.8213	1094
D003	LU_RS03	Tracheophyta	Magnoliopsida	Fabales	Fabaceae	Hylodesmum	Hylodesmum podocarpum	Sunny	Skiophyte	Moist	Hillside	Herb	0-5cm	101.5	Flowering	Loamy	Brown	34.3	13.5	54	17.37	Botanical Garden	Botanical Garden	24.0685	97.8213	1094
T352	LD_RS07	Tracheophyta	Magnoliopsida	Fabales	Fabaceae	Indigofera	Indigofera tinctoria	Sunny	Heliophyte	Moist	Park	Shrub (<2m)	0-5cm	105.1	Vegetative	Loamy	Brown	27.6	11.37	45.47	28.54	City Park	Longmo Lake	24.0025	97.8417	730
T370	LC_RS23	Tracheophyta	Magnoliopsida	Fabales	Fabaceae	Lablab	Lablab purpureus	Sunny	Heliophyte	Moist	Park		0-5cm	10.9	Vegetative	Loamy	Red	18.97	8.67	34.67	22.39	City Park	Longmo Lake	23.9987	97.8395	730
L007	LT_RS08	Tracheophyta	Magnoliopsida	Fabales	Fabaceae	Lespedeza	Lespedeza bicolor	Sunny	Heliophyte	Moist	Hillside	Shrub (<2m)	0-5cm	104.6	Fruiting	Loamy	Brown	30.77	12.4	49.6	22.77	Wanding Town	Huihuan Village	24.1197	98.0461	750
L007	LT_RS09	Tracheophyta	Magnoliopsida	Fabales	Fabaceae	Lespedeza	Lespedeza bicolor	Sunny	Heliophyte	Moist	Hillside	Shrub (<2m)	0-5cm	53.9	Fruiting	Loamy	Brown	30.77	12.4	49.6	22.77	Wanding Town	Huihuan Village	24.1197	98.0461	750
L007	LT_RS07	Tracheophyta	Magnoliopsida	Fabales	Fabaceae	Lespedeza	Lespedeza bicolor	Sunny	Heliophyte	Moist	Hillside	Shrub (<2m)	0-5cm	45.4	Fruiting	Loamy	Brown	30.77	12.4	49.6	22.77	Wanding Town	Huihuan Village	24.1197	98.0461	750
T365	LC_RS18	Tracheophyta	Magnoliopsida	Fabales	Fabaceae	Lespedeza	Lespedeza bicolor	Sunny	Heliophyte	Moist	Park	Shrub (<2m)	0-5cm	60.9	Fruiting	Loamy	Red	25.07	10.57	42.27	19.23	City Park	Longmo Lake	23.999	97.8397	730
T219	FJ_RS02	Tracheophyta	Magnoliopsida	Fabales	Fabaceae	Leucaena	Leucaena leucocephala	Sunny	Heliophyte	Moist	Park	Tree (<10m)	5-10cm	57.9	Vegetative	Loamy	Brown					City Park	Nanmao Lake	24.0115	97.8725	730
T219	FJ_RS05	Tracheophyta	Magnoliopsida	Fabales	Fabaceae	Leucaena	Leucaena leucocephala	Sunny	Heliophyte	Moist	Park	Tree (<10m)	5-10cm	89.2	Vegetative	Loamy	Brown					City Park	Nanmao Lake	24.0115	97.8725	730
T219	FJ_RS09	Tracheophyta	Magnoliopsida	Fabales	Fabaceae	Leucaena	Leucaena leucocephala	Sunny	Heliophyte	Moist	Park	Tree (<10m)	5-10cm	74.7	Vegetative	Loamy	Brown					City Park	Nanmao Lake	24.0115	97.8725	730
E057	KA_RS04	Tracheophyta	Magnoliopsida	Fabales	Fabaceae	Millettia	Millettia macrostachya	Shower	Heliophyte	Moist	Hillside	Tree (<10m)	0-5cm	134.1	Vegetative	Loamy	Brown	31.17	12.5	50	18.64	Botanical Garden	Botanical Garden	24.0701	97.8189	1122
L005	LT_RS03	Tracheophyta	Magnoliopsida	Fabales	Fabaceae	Mimosa	Mimosa pudica	Sunny	Heliophyte	Moist	Hillside	Herb	0-5cm	43.5	Flowering	Loamy	Brown					Wanding Town	Huihuan Village	24.1198	98.0463	750
L005	LT_RS02	Tracheophyta	Magnoliopsida	Fabales	Fabaceae	Mimosa	Mimosa pudica	Sunny	Heliophyte	Moist	Hillside	Herb	0-5cm	216	Flowering	Loamy	Brown					Wanding Town	Huihuan Village	24.1198	98.0463	750
L005	LT_RS01	Tracheophyta	Magnoliopsida	Fabales	Fabaceae	Mimosa	Mimosa pudica	Sunny	Heliophyte	Moist	Hillside	Herb	0-5cm	83.2	Flowering	Loamy	Brown					Wanding Town	Huihuan Village	24.1198	98.0463	750
L013	LT_RS18	Tracheophyta	Magnoliopsida	Fabales	Fabaceae	Mimosa	Mimosa pudica	Sunny	Heliophyte	Dry	Beach	Herb	0-5cm	40.4	Flowering	Sandy	Yellow					Wanding Town	Huihuan Beach	24.1292	98.0506	738
L013	LT_RS17	Tracheophyta	Magnoliopsida	Fabales	Fabaceae	Mimosa	Mimosa pudica	Sunny	Heliophyte	Dry	Beach	Herb	0-5cm	24.9	Flowering	Sandy	Yellow					Wanding Town	Huihuan Beach	24.1292	98.0506	738
L013	LT_RS16	Tracheophyta	Magnoliopsida	Fabales	Fabaceae	Mimosa	Mimosa pudica	Sunny	Heliophyte	Dry	Beach	Herb	0-5cm	27.5	Flowering	Sandy	Yellow					Wanding Town	Huihuan Beach	24.1292	98.0506	738
T323	LC_RS03	Tracheophyta	Magnoliopsida	Fabales	Fabaceae	Mimosa	Mimosa pudica	Sunny	Heliophyte	Moist	Park	Herb	5-10cm	61.7	Flowering	Loamy	Brown					City Park	Longmo Lake	24.0029	97.8429	730
T323	LC_RS04	Tracheophyta	Magnoliopsida	Fabales	Fabaceae	Mimosa	Mimosa pudica	Sunny	Heliophyte	Moist	Park	Herb	5-10cm	103.9	Flowering	Loamy	Brown					City Park	Longmo Lake	24.0029	97.8429	730
T381	LE_RS09	Tracheophyta	Magnoliopsida	Fabales	Fabaceae	Ormosia	Ormosia pinnata	Sunny	Heliophyte	Moist	Park	Tree (<10m)	10-15cm	106.9	Fruiting	Loamy	Red	22.67	9.8	39.2	30.54	City Park	Longmo Lake	24.0031	97.8437	730
T381	LE_RS07	Tracheophyta	Magnoliopsida	Fabales	Fabaceae	Ormosia	Ormosia pinnata	Sunny	Heliophyte	Moist	Park	Tree (<10m)	10-15cm	101.5	Fruiting	Loamy	Red	22.67	9.8	39.2	30.54	City Park	Longmo Lake	24.0031	97.8437	730
T381	LE_RS08	Tracheophyta	Magnoliopsida	Fabales	Fabaceae	Ormosia	Ormosia pinnata	Sunny	Heliophyte	Moist	Park	Tree (<10m)	10-15cm	102.8	Fruiting	Loamy	Red	22.67	9.8	39.2	30.54	City Park	Longmo Lake	24.0031	97.8437	730
L004	LV_RS04	Tracheophyta	Magnoliopsida	Fabales	Fabaceae	Pachyrhizus	Pachyrhizus erosus	Sunny	Heliophyte	Moist	Nursery	Vine	10-15cm	105.9	Vegetative	Loamy	Brown	29.13	11.87	47.47	28.06	Wanding Town	Huihuan Village	24.1193	98.0467	738
T205	CB_RS12	Tracheophyta	Magnoliopsida	Fabales	Fabaceae	Pterocarpus	Pterocarpus indicus	Shower	Heliophyte	Moist	Park	Tree (<10m)	5-10cm	117.2	Vegetative	Loamy	Brown	42.43	16.07	64.27	25.37	City Park	Nanmao Lake	24.0113	97.8727	731
T242	CD_RS20	Tracheophyta	Magnoliopsida	Fabales	Fabaceae	Pterocarpus	Pterocarpus macrocarpus	Sunny	Heliophyte	Moist	Park	Tree (<10m)	5-10cm	96.4	Vegetative	Loamy	Brown	33.33	13.2	52.8	23.24	City Park	Nanmao Lake	24.009	97.8717	720
T242	CD_RS21	Tracheophyta	Magnoliopsida	Fabales	Fabaceae	Pterocarpus	Pterocarpus macrocarpus	Sunny	Heliophyte	Moist	Park	Tree (<10m)	5-10cm	98.9	Vegetative	Loamy	Brown	33.33	13.2	52.8	23.24	City Park	Nanmao Lake	24.009	97.8717	720
T242	CD_RS19	Tracheophyta	Magnoliopsida	Fabales	Fabaceae	Pterocarpus	Pterocarpus macrocarpus	Sunny	Heliophyte	Moist	Park	Tree (<10m)	5-10cm	35.3	Vegetative	Loamy	Brown	33.33	13.2	52.8	23.24	City Park	Nanmao Lake	24.009	97.8717	720
T229	FB_RS10	Tracheophyta	Magnoliopsida	Fabales	Fabaceae	Pterolobium	Pterolobium punctatum	Sunny	Heliophyte	Moist	Park	Tree (<10m)	0-5cm	107.1	Vegetative	Loamy	Brown					City Park	Nanmao Lake	24.0116	97.8717	736
B001	ZG_RS01	Tracheophyta	Magnoliopsida	Fabales	Fabaceae	Pueraria	Pueraria montana	Sunny	Skiophyte	Moist	Hillside	Vine	0-5cm	114.7	Vegetative	Loamy	Brown	32.43	12.9	51.6	18.83	Botanical Garden	Botanical Garden	24.0693	97.8199	1109
L010	LT_RS13	Tracheophyta	Magnoliopsida	Fabales	Fabaceae	Pueraria	Pueraria montana	Sunny	Heliophyte	Moist	Hillside	Vine	0-5cm	107.8	Vegetative	Loamy	Brown	25.4	10.67	42.67	28.31	Wanding Town	Huihuan River	24.1289	98.0506	738
L014	LT_RS19	Tracheophyta	Magnoliopsida	Fabales	Fabaceae	Pueraria	Pueraria montana	Sunny	Heliophyte	Moist	Beach	Vine	5-10cm	46.4	Vegetative	Sandy	Yellow	33.7	13.3	53.2	26.83	Wanding Town	Huihuan Beach	24.1292	98.0506	738
L014	LT_RS21	Tracheophyta	Magnoliopsida	Fabales	Fabaceae	Pueraria	Pueraria montana	Sunny	Heliophyte	Moist	Beach	Vine	5-10cm	71	Vegetative	Sandy	Yellow	33.7	13.3	53.2	26.83	Wanding Town	Huihuan Beach	24.1292	98.0506	738
L014	LT_RS20	Tracheophyta	Magnoliopsida	Fabales	Fabaceae	Pueraria	Pueraria montana	Sunny	Heliophyte	Moist	Beach	Vine	5-10cm	54.2	Vegetative	Sandy	Yellow	33.7	13.3	53.2	26.83	Wanding Town	Huihuan Beach	24.1292	98.0506	738
L003	LP_RS20	Tracheophyta	Magnoliopsida	Fabales	Fabaceae	Puhuaea	Puhuaea sequax	Sunny	Heliophyte	Dry	Hillside	Shrub (<2m)	15-20cm	100.6	Fruiting	Sandy	Yellow	96.1	10.9	43.6	28.2	Botanical Garden	Jingcheng Ariport	24.0685	97.8159	1106
B028	KD_RS10	Tracheophyta	Magnoliopsida	Fabales	Fabaceae	Samanea	Samanea saman	Sunny	Heliophyte	Moist	Hillside	Tree (<10m)	5-10cm	123.1	Vegetative	Loamy	Brown	35.87	13.97	55.87	23.7	Botanical Garden	Botanical Garden	24.0694	97.8196	1112
T223	KE_RS07	Tracheophyta	Magnoliopsida	Fabales	Fabaceae	Samanea	Samanea saman	Sunny	Heliophyte	Moist	Park	Tree (>10m)	5-10cm	222.3	Vegetative	Loamy	Brown	38.83	14.93	59.73	28.14	City Park	Nanmao Lake	24.0115	97.8725	730
T223	KE_RS22	Tracheophyta	Magnoliopsida	Fabales	Fabaceae	Samanea	Samanea saman	Sunny	Heliophyte	Moist	Park	Tree (>10m)	5-10cm	207.6	Vegetative	Loamy	Brown	38.83	14.93	59.73	28.14	City Park	Nanmao Lake	24.0115	97.8725	730
T223	KE_RS08	Tracheophyta	Magnoliopsida	Fabales	Fabaceae	Samanea	Samanea saman	Sunny	Heliophyte	Moist	Park	Tree (>10m)	5-10cm	100.2	Vegetative	Loamy	Brown	38.83	14.93	59.73	28.14	City Park	Nanmao Lake	24.0115	97.8725	730
A027	HB_RS11	Tracheophyta	Magnoliopsida	Fabales	Fabaceae	Saraca	Saraca griffithiana	Sunny	Skiophyte	Moist	Hillside	Tree (<10m)	15-20cm	43	Vegetative	Loamy	Yellow	35.13	13.77	55.07	26.04	Botanical Garden	Botanical Garden	24.0693	97.8204	1074
T059	XA_RS17	Tracheophyta	Magnoliopsida	Fabales	Fabaceae	Senegalia	Senegalia brevispica	Sunny	Heliophyte	Moist	Nursery	Vine	10-15cm	269.1	Vegetative	Loamy	Brown	23.27	9.97	39.87	30.14	Wanding Town	Huihuan Village	24.1194	98.0467	739
T059	XA_RS19	Tracheophyta	Magnoliopsida	Fabales	Fabaceae	Senegalia	Senegalia brevispica	Sunny	Heliophyte	Moist	Nursery	Vine	10-15cm	97.1	Vegetative	Loamy	Brown	23.27	9.97	39.87	30.14	Wanding Town	Huihuan Village	24.1194	98.0467	739
T059	HA_RS24	Tracheophyta	Magnoliopsida	Fabales	Fabaceae	Senegalia	Senegalia brevispica	Sunny	Heliophyte	Moist	Nursery	Vine	10-15cm	76.9	Vegetative	Loamy	Brown	23.27	9.97	39.87	30.14	Wanding Town	Huihuan Village	24.1194	98.0467	739
L015	HA_RS21	Tracheophyta	Magnoliopsida	Fabales	Fabaceae	Senna	Senna hirsuta	Sunny	Heliophyte	Moist	Hillside	Shrub (<2m)	5-10cm	71.6	Fruiting	Loamy	Brown	39.63	15.2	60.8	27.98	Wanding Town	Huihuan River	24.1272	98.0492	778
L015	HA_RS19	Tracheophyta	Magnoliopsida	Fabales	Fabaceae	Senna	Senna hirsuta	Sunny	Heliophyte	Moist	Hillside	Shrub (<2m)	5-10cm	104.4	Fruiting	Loamy	Brown	39.63	15.2	60.8	27.98	Wanding Town	Huihuan River	24.1272	98.0492	778
L015	HA_RS20	Tracheophyta	Magnoliopsida	Fabales	Fabaceae	Senna	Senna hirsuta	Sunny	Heliophyte	Moist	Hillside	Shrub (<2m)	5-10cm	117.7	Fruiting	Loamy	Brown	39.63	15.2	60.8	27.98	Wanding Town	Huihuan River	24.1272	98.0492	778
T396	ZE_RS19	Tracheophyta	Magnoliopsida	Fabales	Fabaceae	Senna	Senna occidentalis	Sunny	Heliophyte	Moist	Park		0-5cm	70.1	Vegetative	Sandy	Yellow					City Park	Longmo Lake	24.0017	97.8351	730
T396	ZE_RS20	Tracheophyta	Magnoliopsida	Fabales	Fabaceae	Senna	Senna occidentalis	Sunny	Heliophyte	Moist	Park		0-5cm	29.6	Vegetative	Sandy	Yellow					City Park	Longmo Lake	24.0017	97.8351	730
T396	ZE_RS21	Tracheophyta	Magnoliopsida	Fabales	Fabaceae	Senna	Senna occidentalis	Sunny	Heliophyte	Moist	Park		0-5cm	54.3	Vegetative	Sandy	Yellow					City Park	Longmo Lake	24.0017	97.8351	730
T399	ZE_RS24	Tracheophyta	Magnoliopsida	Fabales	Fabaceae	Senna	Senna occidentalis	Sunny	Heliophyte	Moist	Park	Shrub (<2m)	5-10cm	107.6	Fruiting	Sandy	Yellow	30.53	12.3	49.2	17.81	City Park	Longmo Lake	24.0014	97.8346	730
T124	LI_RS22	Tracheophyta	Magnoliopsida	Fabales	Fabaceae	Senna	Senna siamea	Sunny	Heliophyte	Moist	Park	Tree (>10m)	10-15cm	102.4	Vegetative	Loamy	Brown	34.77	13.67	54.67	27.1	City Park	Nanmao Lake	24.0094	97.8737	724
T181	LF_RS19	Tracheophyta	Magnoliopsida	Fabales	Fabaceae	Senna	Senna siamea	Sunny	Heliophyte	Moist	Park	Tree (<10m)	10-15cm	56.2	Vegetative	Loamy	Brown	37.13	14.43	57.73	25.58	City Park	Nanmao Lake	24.0094	97.8737	730
T398	ZE_RS23	Tracheophyta	Magnoliopsida	Fabales	Fabaceae	Senna	Senna tora	Sunny	Heliophyte	Moist	Park	Herb	15-20cm	112.5	Fruiting	Sandy	Yellow	41	15.6	62.4	17.81	City Park	Longmo Lake	24.0015	97.8347	730
T367	LC_RS20	Tracheophyta	Magnoliopsida	Fabales	Fabaceae	Sesbania	Sesbania bispinosa	Sunny	Heliophyte	Moist	Park	Shrub (<2m)	5-10cm	101.4	Fruiting	Loamy	Red					City Park	Longmo Lake	23.9989	97.8395	730
L008	LT_RS11	Tracheophyta	Magnoliopsida	Fabales	Fabaceae	Shuteria	Shuteria involucrata	Sunny	Heliophyte	Moist	Hillside		0-5cm	60.6	Vegetative	Loamy	Brown	23.5	10.07	40.27	22.1	Wanding Town	Huihuan Village	24.1198	98.0462	750
L008	LT_RS10	Tracheophyta	Magnoliopsida	Fabales	Fabaceae	Shuteria	Shuteria involucrata	Sunny	Heliophyte	Moist	Hillside		0-5cm	44.5	Vegetative	Loamy	Brown	23.5	10.07	40.27	22.1	Wanding Town	Huihuan Village	24.1198	98.0462	750
L012	LT_RS15	Tracheophyta	Magnoliopsida	Fabales	Fabaceae	Shuteria	Shuteria involucrata	Sunny	Skiophyte	Moist	Hillside		5-10cm	75.6	Vegetative	Loamy	Brown	25.63	10.77	43.07	26.75	Wanding Town	Huihuan River	24.1287	98.0507	739
B072	XF_RS03	Tracheophyta	Magnoliopsida	Fabales	Fabaceae	Spatholobus	Spatholobus suberectus	Sunny	Skiophyte	Moist	Hillside	Vine	5-10cm	91.3	Vegetative	Loamy	Brown	14.93	7.37	29.47	21.93	Botanical Garden	Botanical Garden	24.0718	97.8163	1120
B072	HD_RS16	Tracheophyta	Magnoliopsida	Fabales	Fabaceae	Spatholobus	Spatholobus suberectus	Sunny	Skiophyte	Moist	Hillside	Vine	5-10cm	101.6	Vegetative	Loamy	Brown	14.93	7.37	29.47	21.93	Botanical Garden	Botanical Garden	24.0718	97.8163	1120
D002	LU_RS01	Tracheophyta	Magnoliopsida	Fabales	Fabaceae	Spatholobus	Spatholobus suberectus	Sunny	Skiophyte	Moist	Hillside		0-5cm	103.9	Vegetative	Loamy	Brown	31.47	12.63	50.53	16.85	Botanical Garden	Botanical Garden	24.0685	97.8212	1094
T029	LR_RS10	Tracheophyta	Magnoliopsida	Fabales	Fabaceae	Spatholobus	Spatholobus suberectus	Sunny	Heliophyte	Moist	Hillside	Vine	5-10cm	90.8	Vegetative	Loamy	Brown	34.37	13.63	54.13	25.35	Botanical Garden	Botanical Garden	24.0708	97.818	1136
T142	KI_RS08	Tracheophyta	Magnoliopsida	Fabales	Fabaceae	Tamarindus	Tamarindus indica	Sunny	Heliophyte	Dry	Park	Tree (<10m)	5-10cm	103.6	Vegetative	Loamy	Brown					City Park	Nanmao Lake	24.0111	97.871	720
F110	LG_RS10	Tracheophyta	Magnoliopsida	Fabales	Fabaceae	Tephrosia	Tephrosia noctiflora	Sunny	Heliophyte	Moist	Hillside	Herb	15-20cm	101.4	Fruiting	Sandy	Yellow	21.47	9.43	37.73	21.91	Botanical Garden	Jingcheng Ariport	24.0685	97.8158	1106
L002	LP_RS19	Tracheophyta	Magnoliopsida	Fabales	Fabaceae	Tephrosia	Tephrosia noctiflora	Sunny	Heliophyte	Dry	Hillside	Herb	15-20cm	100.1	Fruiting	Sandy	Red	20.93	9.27	37.07	28	Botanical Garden	Jingcheng Ariport	24.0685	97.8158	1106
L002	LP_RS18	Tracheophyta	Magnoliopsida	Fabales	Fabaceae	Tephrosia	Tephrosia noctiflora	Sunny	Heliophyte	Dry	Hillside	Herb	15-20cm	101.6	Fruiting	Sandy	Red	20.93	9.27	37.07	28	Botanical Garden	Jingcheng Ariport	24.0685	97.8158	1106
L002	LP_RS17	Tracheophyta	Magnoliopsida	Fabales	Fabaceae	Tephrosia	Tephrosia noctiflora	Sunny	Heliophyte	Dry	Hillside	Herb	15-20cm	100.1	Fruiting	Sandy	Red	20.93	9.27	37.07	28	Botanical Garden	Jingcheng Ariport	24.0685	97.8158	1106
T129	LG_RS13	Tracheophyta	Magnoliopsida	Fabales	Fabaceae	Tephrosia	Tephrosia noctiflora	Sunny	Heliophyte	Moist	Park	Herb	0-5cm	98.3	Fruiting	Loamy	Brown	29.5	11.97	47.87	26.5	City Park	Nanmao Lake	24.0106	97.8728	730
B091	XE_RS10	Tracheophyta	Magnoliopsida	Fabales	Fabaceae	Uraria	Uraria oblonga	Sunny	Skiophyte	Moist	Hillside		5-10cm	74.9	Vegetative	Loamy	Brown	31.67	12.67	50.67	22.62	Botanical Garden	Botanical Garden	24.0713	97.8178	1140
B091	XE_RS11	Tracheophyta	Magnoliopsida	Fabales	Fabaceae	Uraria	Uraria oblonga	Sunny	Skiophyte	Moist	Hillside		5-10cm	47.6	Vegetative	Loamy	Brown	31.67	12.67	50.67	22.62	Botanical Garden	Botanical Garden	24.0713	97.8178	1140
B091	XE_RS09	Tracheophyta	Magnoliopsida	Fabales	Fabaceae	Uraria	Uraria oblonga	Sunny	Skiophyte	Moist	Hillside		5-10cm	45.9	Vegetative	Loamy	Brown	31.67	12.67	50.67	22.62	Botanical Garden	Botanical Garden	24.0713	97.8178	1140
T423	ZA_RS21	Tracheophyta	Magnoliopsida	Fabales	Fabaceae	Vigna	Vigna angularis	Sunny	Heliophyte	Dry	Park		0-5cm	100	Flowering	Loamy	Brown	36.67	13.63	54.53	27.52	City Park	Longmo Lake	24.0018	97.8346	730
A042	FF_RS18	Tracheophyta	Magnoliopsida	Fagales	Juglandaceae	Carya	Carya cathayensis	Sunny	Heliophyte	Moist	Hillside	Tree (<10m)	5-10cm	87.2	Vegetative	Loamy	Brown	22.8	9.87	39.47	22.83	Botanical Garden	Botanical Garden	24.0709	97.8184	1135
B041	HE_RS15	Tracheophyta	Magnoliopsida	Fagales	Fagaceae	Castanopsis	Castanopsis calathiformis	Sunny	Heliophyte	Moist	Hillside	Tree (<10m)	5-10cm	107.1	Vegetative	Loamy	Brown	28.9	11.8	47.2	18.48	Botanical Garden	Botanical Garden	24.0694	97.8184	1113
T031	LR_RS12	Tracheophyta	Magnoliopsida	Fagales	Fagaceae	Castanopsis	Castanopsis echidnocarpa	Sunny	Skiophyte	Moist	Hillside	Tree (<10m)	5-10cm	109.5	Vegetative	Loamy	Red	30.57	12.33	49.33	25.1	Botanical Garden	Botanical Garden	24.0707	97.818	1136
E091	XD_RS23	Tracheophyta	Magnoliopsida	Fagales	Fagaceae	Castanopsis	Castanopsis fargesii	Shower	Heliophyte	Moist	Hillside	Tree (>10m)	0-5cm	111.7	Fruiting	Loamy	Brown	36.57	14.2	56.8	17.14	Botanical Garden	Botanical Garden	24.0703	97.817	1140
B107	HC_RS05	Tracheophyta	Magnoliopsida	Fagales	Fagaceae	Lithocarpus	Lithocarpus grandifolius	Sunny	Heliophyte	Moist	Hillside	Tree (<10m)	5-10cm	104.6	Vegetative	Loamy	Brown	33.57	13.23	52.93	18.2	Botanical Garden	Botanical Garden	24.0699	97.8176	1106
B107	HC_RS10	Tracheophyta	Magnoliopsida	Fagales	Fagaceae	Lithocarpus	Lithocarpus grandifolius	Sunny	Heliophyte	Moist	Hillside	Tree (<10m)	5-10cm	97.4	Vegetative	Loamy	Brown	33.57	13.23	52.93	18.2	Botanical Garden	Botanical Garden	24.0699	97.8176	1106
B107	HC_RS06	Tracheophyta	Magnoliopsida	Fagales	Fagaceae	Lithocarpus	Lithocarpus grandifolius	Sunny	Heliophyte	Moist	Hillside	Tree (<10m)	5-10cm	99.2	Vegetative	Loamy	Brown	33.57	13.23	52.93	18.2	Botanical Garden	Botanical Garden	24.0699	97.8176	1106
B134	ZF_RS17	Tracheophyta	Magnoliopsida	Fagales	Fagaceae	Lithocarpus	Lithocarpus hancei	Sunny	Heliophyte	Moist	Hillside	Tree (<10m)	5-10cm	106.9	Vegetative	Loamy	Brown	32	12.8	51.2	20.5	Botanical Garden	Botanical Garden	24.0685	97.8207	1072
E052	XD_RS01	Tracheophyta	Magnoliopsida	Fagales	Myricaceae	Morella	Morella rubra	Shower	Heliophyte	Moist	Hillside	Tree (<10m)	0-5cm	108.2	Vegetative	Loamy	Brown	27.6	11.37	45.47	14.39	Botanical Garden	Botanical Garden	24.0699	97.819	1119
A020	XA_RS02	Tracheophyta	Magnoliopsida	Fagales	Fagaceae	Quercus	Quercus acutissima	Sunny	Heliophyte	Moist	Hillside	Tree (>10m)	5-10cm	153.4	Vegetative	Loamy	Red	25.23	10.6	42.4	25.26	Botanical Garden	Botanical Garden	24.0692	97.8191	1108
T178	LF_RS12	Tracheophyta	Magnoliopsida	Gentianales	Apocynaceae	Allamanda	Allamanda schottii	Sunny	Heliophyte	Dry	Park	Shrub (>2m)	5-10cm	102.4	Flowering	Loamy	Brown	43.57	16.43	65.73	24.91	City Park	Nanmao Lake	24.0108	97.8697	726
T385	LE_RS17	Tracheophyta	Magnoliopsida	Gentianales	Apocynaceae	Allamanda	Allamanda schottii	Sunny	Skiophyte	Moist	Park	Shrub (<2m)	0-5cm	108.8	Vegetative	Loamy	Red	16.07	7.73	30.93	30	City Park	Longmo Lake	24.0021	97.843	730
T385	LE_RS18	Tracheophyta	Magnoliopsida	Gentianales	Apocynaceae	Allamanda	Allamanda schottii	Sunny	Skiophyte	Moist	Park	Shrub (<2m)	0-5cm	100.5	Vegetative	Loamy	Red	16.07	7.73	30.93	30	City Park	Longmo Lake	24.0021	97.843	730
T385	LE_RS19	Tracheophyta	Magnoliopsida	Gentianales	Apocynaceae	Allamanda	Allamanda schottii	Sunny	Skiophyte	Moist	Park	Shrub (<2m)	0-5cm	103.4	Vegetative	Loamy	Red	16.07	7.73	30.93	30	City Park	Longmo Lake	24.0021	97.843	730
A064	FG_RS21	Tracheophyta	Magnoliopsida	Gentianales	Apocynaceae	Alstonia	Alstonia scholaris	Sunny	Heliophyte	Moist	Hillside	Tree (>10m)	5-10cm	100.7	Vegetative	Loamy	Brown	35.2	13.77	55.07	21.56	Botanical Garden	Botanical Garden	24.0693	97.8207	1110
E062	KA_RS17	Tracheophyta	Magnoliopsida	Gentianales	Apocynaceae	Alstonia	Alstonia scholaris	Shower	Heliophyte	Moist	Hillside	Tree (<10m)	10-15cm	180.9	Vegetative	Loamy	Brown	34.13	13.43	53.73	14.04	Botanical Garden	Botanical Garden	24.0701	97.8189	1122
T195	XJ_RS04	Tracheophyta	Magnoliopsida	Gentianales	Apocynaceae	Alstonia	Alstonia scholaris	Shower	Heliophyte	Moist	Park	Tree (<10m)	0-5cm	118	Vegetative	Loamy	Red	38	14.67	58.67	25.77	City Park	Nanmao Lake	24.0123	97.8698	718
T195	XJ_RS06	Tracheophyta	Magnoliopsida	Gentianales	Apocynaceae	Alstonia	Alstonia scholaris	Shower	Heliophyte	Moist	Park	Tree (<10m)	0-5cm	111.5	Vegetative	Loamy	Red	38	14.67	58.67	25.77	City Park	Nanmao Lake	24.0123	97.8698	718
T195	XJ_RS05	Tracheophyta	Magnoliopsida	Gentianales	Apocynaceae	Alstonia	Alstonia scholaris	Shower	Heliophyte	Moist	Park	Tree (<10m)	0-5cm	110.7	Vegetative	Loamy	Red	38	14.67	58.67	25.77	City Park	Nanmao Lake	24.0123	97.8698	718
T361	ZB_RS17	Tracheophyta	Magnoliopsida	Gentianales	Apocynaceae	Alstonia	Alstonia scholaris	Sunny	Skiophyte	Moist	Park	Tree (<10m)	0-5cm	28.1	Vegetative	Loamy	Brown	29.13	11.87	47.47	21.14	City Park	Longmo Lake	23.9989	97.8398	730
E069	KA_RS13	Tracheophyta	Magnoliopsida	Gentianales	Rubiaceae	Canthium	Canthium horridum	Shower	Skiophyte	Moist	Hillside	Shrub (<2m)	5-10cm	109.7	Vegetative	Loamy	Brown	30.97	12.43	49.73	15.29	Botanical Garden	Botanical Garden	24.0704	97.8184	1111
T378	ZD_RS11	Tracheophyta	Magnoliopsida	Gentianales	Apocynaceae	Catharanthus	Catharanthus roseus	Sunny	Skiophyte	Moist	Park	Shrub (<2m)	0-5cm	112.7	Vegetative	Loamy	Red	16.57	7.9	31.6	28.43	City Park	Longmo Lake	24.0034	97.8435	730
T378	ZD_RS10	Tracheophyta	Magnoliopsida	Gentianales	Apocynaceae	Catharanthus	Catharanthus roseus	Sunny	Skiophyte	Moist	Park	Shrub (<2m)	0-5cm	110.8	Vegetative	Loamy	Red	16.57	7.9	31.6	28.43	City Park	Longmo Lake	24.0034	97.8435	730
T378	ZD_RS12	Tracheophyta	Magnoliopsida	Gentianales	Apocynaceae	Catharanthus	Catharanthus roseus	Sunny	Skiophyte	Moist	Park	Shrub (<2m)	0-5cm	110.3	Vegetative	Loamy	Red	16.57	7.9	31.6	28.43	City Park	Longmo Lake	24.0034	97.8435	730
B095	KB_RS24	Tracheophyta	Magnoliopsida	Gentianales	Rubiaceae	Chassalia	Chassalia curviflora	Sunny	Skiophyte	Moist	Hillside	Shrub (<2m)	10-15cm	110.3	Fruiting	Loamy	Brown	33.07	13.13	52.53	17.31	Botanical Garden	Botanical Garden	24.07	97.8177	1121
E085	XD_RS18	Tracheophyta	Magnoliopsida	Gentianales	Rubiaceae	Dimetia	Dimetia scandens	Shower	Skiophyte	Moist	Hillside	Shrub (<2m)	5-10cm	105.1	Vegetative	Loamy	Brown	37.3	14.43	57.73	16.68	Botanical Garden	Botanical Garden	24.0705	97.8173	1111
B064	HD_RS05	Tracheophyta	Magnoliopsida	Gentianales	Rubiaceae	Diplospora	Diplospora dubia	Sunny	Heliophyte	Moist	Hillside	Shrub (>2m)	5-10cm	96.1	Vegetative	Loamy	Brown	32.83	13.23	52.33	17.85	Botanical Garden	Botanical Garden	24.071	97.817	1130
B064	HD_RS04	Tracheophyta	Magnoliopsida	Gentianales	Rubiaceae	Diplospora	Diplospora dubia	Sunny	Heliophyte	Moist	Hillside	Shrub (>2m)	5-10cm	106.7	Vegetative	Loamy	Brown	32.83	13.23	52.33	17.85	Botanical Garden	Botanical Garden	24.071	97.817	1130
B064	HD_RS03	Tracheophyta	Magnoliopsida	Gentianales	Rubiaceae	Diplospora	Diplospora dubia	Sunny	Heliophyte	Moist	Hillside	Shrub (>2m)	5-10cm	21.1	Vegetative	Loamy	Brown	32.83	13.23	52.33	17.85	Botanical Garden	Botanical Garden	24.071	97.817	1130
E070	KA_RS19	Tracheophyta	Magnoliopsida	Gentianales	Rubiaceae	Diplospora	Diplospora dubia	Shower	Skiophyte	Moist	Hillside	Shrub (>2m)	5-10cm	100.3	Vegetative	Loamy	Brown	33.4	13.23	52.93	15.27	Botanical Garden	Botanical Garden	24.0705	97.8183	1111
A032	LS_RS14	Tracheophyta	Magnoliopsida	Gentianales	Gentianaceae	Fagraea	Fagraea ceilanica	Sunny	Heliophyte	Moist	Hillside	Shrub (<2m)	5-10cm	102.7	Vegetative	Loamy	Brown	44.57	16.77	67.07	28.21	Botanical Garden	Botanical Garden	24.0698	97.8195	1117
A032	LS_RS15	Tracheophyta	Magnoliopsida	Gentianales	Gentianaceae	Fagraea	Fagraea ceilanica	Sunny	Heliophyte	Moist	Hillside	Shrub (<2m)	5-10cm	100.1	Vegetative	Loamy	Brown	44.57	16.77	67.07	28.21	Botanical Garden	Botanical Garden	24.0698	97.8195	1117
A032	LS_RS16	Tracheophyta	Magnoliopsida	Gentianales	Gentianaceae	Fagraea	Fagraea ceilanica	Sunny	Heliophyte	Moist	Hillside	Shrub (<2m)	5-10cm	108.1	Vegetative	Loamy	Brown	44.57	16.77	67.07	28.21	Botanical Garden	Botanical Garden	24.0698	97.8195	1117
T201	KF_RS05	Tracheophyta	Magnoliopsida	Gentianales	Gentianaceae	Fagraea	Fagraea ceilanica	Shower	Heliophyte	Moist	Park	Shrub (>2m)	5-10cm	104.6	Vegetative	Loamy	Brown	37.1	14.4	57.6	25.81	City Park	Nanmao Lake	24.0115	97.8723	733
T201	KF_RS03	Tracheophyta	Magnoliopsida	Gentianales	Gentianaceae	Fagraea	Fagraea ceilanica	Shower	Heliophyte	Moist	Park	Shrub (>2m)	5-10cm	100.6	Vegetative	Loamy	Brown	37.1	14.4	57.6	25.81	City Park	Nanmao Lake	24.0115	97.8723	733
T201	KF_RS04	Tracheophyta	Magnoliopsida	Gentianales	Gentianaceae	Fagraea	Fagraea ceilanica	Shower	Heliophyte	Moist	Park	Shrub (>2m)	5-10cm	106.5	Vegetative	Loamy	Brown	37.1	14.4	57.6	25.81	City Park	Nanmao Lake	24.0115	97.8723	733
T419	ZA_RS12	Tracheophyta	Magnoliopsida	Gentianales	Gentianaceae	Fagraea	Fagraea ceilanica	Sunny	Heliophyte	Moist	Park	Shrub (<2m)	0-5cm	102.7	Vegetative	Loamy	Red	35.13	13.77	55.07	27.35	City Park	Longmo Lake	24.0012	97.8346	730
T419	ZA_RS13	Tracheophyta	Magnoliopsida	Gentianales	Gentianaceae	Fagraea	Fagraea ceilanica	Sunny	Heliophyte	Moist	Park	Shrub (<2m)	0-5cm	123.9	Vegetative	Loamy	Red	35.13	13.77	55.07	27.35	City Park	Longmo Lake	24.0012	97.8346	730
T419	ZA_RS14	Tracheophyta	Magnoliopsida	Gentianales	Gentianaceae	Fagraea	Fagraea ceilanica	Sunny	Heliophyte	Moist	Park	Shrub (<2m)	0-5cm	76.5	Vegetative	Loamy	Red	35.13	13.77	55.07	27.35	City Park	Longmo Lake	24.0012	97.8346	730
C017	KG_RS08	Tracheophyta	Magnoliopsida	Gentianales	Rubiaceae	Fosbergia	Fosbergia shweliensis	Sunny	Skiophyte	Moist	Reserve	Tree (<10m)	0-5cm	58.9	Vegetative	Loamy	Brown	35.17	13.8	55.2	17.79	Moli Rainforest	Moli Rainforest	24.1071	97.9847	836
T214	FJ_RS12	Tracheophyta	Magnoliopsida	Gentianales	Rubiaceae	Gardenia	Gardenia jasminoides	Sunny	Heliophyte	Moist	Park	Shrub (<2m)	5-10cm	96.2	Vegetative	Loamy	Brown	32.8	13.03	52.13	26.54	City Park	Nanmao Lake	24.0113	97.8726	730
T214	FJ_RS10	Tracheophyta	Magnoliopsida	Gentianales	Rubiaceae	Gardenia	Gardenia jasminoides	Sunny	Heliophyte	Moist	Park	Shrub (<2m)	5-10cm	80.6	Vegetative	Loamy	Brown	32.8	13.03	52.13	26.54	City Park	Nanmao Lake	24.0113	97.8726	730
T214	FJ_RS11	Tracheophyta	Magnoliopsida	Gentianales	Rubiaceae	Gardenia	Gardenia jasminoides	Sunny	Heliophyte	Moist	Park	Shrub (<2m)	5-10cm	109	Vegetative	Loamy	Brown	32.8	13.03	52.13	26.54	City Park	Nanmao Lake	24.0113	97.8726	730
T045	LQ_RS23	Tracheophyta	Magnoliopsida	Gentianales	Rubiaceae	Hedyotis	Hedyotis auricularia	Sunny	Heliophyte	Dry	Hillside	Herb	5-10cm	83.5	Fruiting	Loamy	Yellow	18.5	8.5	34	24.08	Botanical Garden	Jingcheng Ariport	24.0688	97.8156	1116
T045	LQ_RS22	Tracheophyta	Magnoliopsida	Gentianales	Rubiaceae	Hedyotis	Hedyotis auricularia	Sunny	Heliophyte	Dry	Hillside	Herb	5-10cm	99.9	Fruiting	Loamy	Yellow	18.5	8.5	34	24.08	Botanical Garden	Jingcheng Ariport	24.0688	97.8156	1116
B143	LU_RS23	Tracheophyta	Magnoliopsida	Gentianales	Rubiaceae	Hyptianthera	Hyptianthera stricta	Sunny	Skiophyte	Moist	Hillside	Shrub (>2m)	0-5cm	114	Vegetative	Loamy	Brown	38.73	14.93	59.73	23.41	Botanical Garden	Botanical Garden	24.0685	97.8211	1072
B143	LU_RS22	Tracheophyta	Magnoliopsida	Gentianales	Rubiaceae	Hyptianthera	Hyptianthera stricta	Sunny	Skiophyte	Moist	Hillside	Shrub (>2m)	0-5cm	103.3	Vegetative	Loamy	Brown	38.73	14.93	59.73	23.41	Botanical Garden	Botanical Garden	24.0685	97.8211	1072
B143	LU_RS21	Tracheophyta	Magnoliopsida	Gentianales	Rubiaceae	Hyptianthera	Hyptianthera stricta	Sunny	Skiophyte	Moist	Hillside	Shrub (>2m)	0-5cm	113.3	Vegetative	Loamy	Brown	38.73	14.93	59.73	23.41	Botanical Garden	Botanical Garden	24.0685	97.8211	1072
T095	ZE_RS05	Tracheophyta	Magnoliopsida	Gentianales	Rubiaceae	Ixora	Ixora chinensis	Sunny	Heliophyte	Moist	Park	Shrub (<2m)	0-5cm	83.6	Vegetative	Loamy	Brown	35.1	13.77	55.07	21.79	City Park	Nanmao Lake	24.0091	97.8707	719
T095	ZE_RS03	Tracheophyta	Magnoliopsida	Gentianales	Rubiaceae	Ixora	Ixora chinensis	Sunny	Heliophyte	Moist	Park	Shrub (<2m)	0-5cm	108.6	Vegetative	Loamy	Brown	35.1	13.77	55.07	21.79	City Park	Nanmao Lake	24.0091	97.8707	719
T095	ZE_RS04	Tracheophyta	Magnoliopsida	Gentianales	Rubiaceae	Ixora	Ixora chinensis	Sunny	Heliophyte	Moist	Park	Shrub (<2m)	0-5cm	100.9	Vegetative	Loamy	Brown	35.1	13.77	55.07	21.79	City Park	Nanmao Lake	24.0091	97.8707	719
T377	ZD_RS07	Tracheophyta	Magnoliopsida	Gentianales	Rubiaceae	Ixora	Ixora chinensis	Sunny	Skiophyte	Moist	Park	Shrub (<2m)	0-5cm	113.4	Flowering	Loamy	Red	26.6	11.07	44.27	27.79	City Park	Longmo Lake	24.0036	97.8434	730
T377	ZD_RS09	Tracheophyta	Magnoliopsida	Gentianales	Rubiaceae	Ixora	Ixora chinensis	Sunny	Skiophyte	Moist	Park	Shrub (<2m)	0-5cm	105.6	Flowering	Loamy	Red	26.6	11.07	44.27	27.79	City Park	Longmo Lake	24.0036	97.8434	730
T377	ZD_RS08	Tracheophyta	Magnoliopsida	Gentianales	Rubiaceae	Ixora	Ixora chinensis	Sunny	Skiophyte	Moist	Park	Shrub (<2m)	0-5cm	118.5	Flowering	Loamy	Red	26.6	11.07	44.27	27.79	City Park	Longmo Lake	24.0036	97.8434	730
T030	LR_RS11	Tracheophyta	Magnoliopsida	Gentianales	Rubiaceae	Mussaenda	Mussaenda multinervis	Sunny	Skiophyte	Moist	Hillside	Shrub (<2m)	5-10cm	105.3	Vegetative	Loamy	Brown	25.03	10.63	42.53	25.56	Botanical Garden	Botanical Garden	24.0708	97.8179	1136
C084	FE_RS07	Tracheophyta	Magnoliopsida	Gentianales	Rubiaceae	Mycetia	Mycetia faberi	Sunny	Skiophyte	Moist	Reserve		0-5cm	101.2	Vegetative	Loamy	Brown	27.5	11.33	45.33	19.6	Moli Rainforest	Moli Rainforest	24.114	97.983	900
C084	LV_RS19	Tracheophyta	Magnoliopsida	Gentianales	Rubiaceae	Mycetia	Mycetia faberi	Sunny	Skiophyte	Moist	Reserve		0-5cm	104.1	Vegetative	Loamy	Brown	27.5	11.33	45.33	19.6	Moli Rainforest	Moli Rainforest	24.114	97.983	900
C084	LV_RS20	Tracheophyta	Magnoliopsida	Gentianales	Rubiaceae	Mycetia	Mycetia faberi	Sunny	Skiophyte	Moist	Reserve		0-5cm	118.7	Vegetative	Loamy	Brown	27.5	11.33	45.33	19.6	Moli Rainforest	Moli Rainforest	24.114	97.983	900
A054	KH_RS04	Tracheophyta	Magnoliopsida	Gentianales	Rubiaceae	Mycetia	Mycetia hirta	Sunny	Skiophyte	Moist	Hillside	Shrub (<2m)	0-5cm	80.9	Fruiting	Loamy	Brown	34	13.4	53.6	21.77	Botanical Garden	Botanical Garden	24.0715	97.8171	1132
A054	KH_RS05	Tracheophyta	Magnoliopsida	Gentianales	Rubiaceae	Mycetia	Mycetia hirta	Sunny	Skiophyte	Moist	Hillside	Shrub (<2m)	0-5cm	53.5	Fruiting	Loamy	Brown	34	13.4	53.6	21.77	Botanical Garden	Botanical Garden	24.0715	97.8171	1132
A054	KH_RS06	Tracheophyta	Magnoliopsida	Gentianales	Rubiaceae	Mycetia	Mycetia hirta	Sunny	Skiophyte	Moist	Hillside	Shrub (<2m)	0-5cm	21.1	Fruiting	Loamy	Brown	34	13.4	53.6	21.77	Botanical Garden	Botanical Garden	24.0715	97.8171	1132
B051	KD_RS07	Tracheophyta	Magnoliopsida	Gentianales	Rubiaceae	Mycetia	Mycetia hirta	Sunny	Skiophyte	Moist	Hillside	Shrub (<2m)	5-10cm	103.1	Vegetative	Loamy	Brown	32.07	12.8	51.2	16.5	Botanical Garden	Botanical Garden	24.0707	97.8175	1116
B051	KD_RS01	Tracheophyta	Magnoliopsida	Gentianales	Rubiaceae	Mycetia	Mycetia hirta	Sunny	Skiophyte	Moist	Hillside	Shrub (<2m)	5-10cm	113.9	Vegetative	Loamy	Brown	32.07	12.8	51.2	16.5	Botanical Garden	Botanical Garden	24.0707	97.8175	1116
B051	KD_RS09	Tracheophyta	Magnoliopsida	Gentianales	Rubiaceae	Mycetia	Mycetia hirta	Sunny	Skiophyte	Moist	Hillside	Shrub (<2m)	5-10cm	127.4	Vegetative	Loamy	Brown	32.07	12.8	51.2	16.5	Botanical Garden	Botanical Garden	24.0707	97.8175	1116
C023	KG_RS19	Tracheophyta	Magnoliopsida	Gentianales	Rubiaceae	Mycetia	Mycetia hirta	Sunny	Skiophyte	Moist	Reserve	Shrub (<2m)	0-5cm	89.3	Vegetative	Loamy	Brown	31.1	12.5	50	19.89	Moli Rainforest	Moli Rainforest	24.1067	97.9839	838
C023	KG_RS17	Tracheophyta	Magnoliopsida	Gentianales	Rubiaceae	Mycetia	Mycetia hirta	Sunny	Skiophyte	Moist	Reserve	Shrub (<2m)	0-5cm	109.3	Vegetative	Loamy	Brown	31.1	12.5	50	19.89	Moli Rainforest	Moli Rainforest	24.1067	97.9839	838
C023	KG_RS18	Tracheophyta	Magnoliopsida	Gentianales	Rubiaceae	Mycetia	Mycetia hirta	Sunny	Skiophyte	Moist	Reserve	Shrub (<2m)	0-5cm	158.5	Vegetative	Loamy	Brown	31.1	12.5	50	19.89	Moli Rainforest	Moli Rainforest	24.1067	97.9839	838
A023	HB_RS01	Tracheophyta	Magnoliopsida	Gentianales	Rubiaceae	Neonauclea	Neonauclea tsaiana	Sunny	Heliophyte	Moist	Hillside	Tree (<10m)	5-10cm	104	Vegetative	Loamy	Brown	35.47	13.87	55.47	26.06	Botanical Garden	Botanical Garden	24.0693	97.8204	1096
T200	CB_RS17	Tracheophyta	Magnoliopsida	Gentianales	Apocynaceae	Nerium	Nerium oleander	Shower	Heliophyte	Moist	Park	Shrub (<2m)	5-10cm	103.8	Vegetative	Loamy	Brown	36.8	14.3	57.2	25.38	City Park	Nanmao Lake	24.0116	97.8722	747
T200	CB_RS16	Tracheophyta	Magnoliopsida	Gentianales	Apocynaceae	Nerium	Nerium oleander	Shower	Heliophyte	Moist	Park	Shrub (<2m)	5-10cm	102.1	Vegetative	Loamy	Brown	36.8	14.3	57.2	25.38	City Park	Nanmao Lake	24.0116	97.8722	747
T200	CB_RS15	Tracheophyta	Magnoliopsida	Gentianales	Apocynaceae	Nerium	Nerium oleander	Shower	Heliophyte	Moist	Park	Shrub (<2m)	5-10cm	110.1	Vegetative	Loamy	Brown	36.8	14.3	57.2	25.38	City Park	Nanmao Lake	24.0116	97.8722	747
T421	ZA_RS19	Tracheophyta	Magnoliopsida	Gentianales	Apocynaceae	Nerium	Nerium oleander	Sunny	Heliophyte	Moist	Park	Shrub (>2m)	10-15cm	113.4	Flowering	Loamy	Brown	29.17	11.87	47.47	27.14	City Park	Longmo Lake	24.002	97.8347	730
T421	ZA_RS18	Tracheophyta	Magnoliopsida	Gentianales	Apocynaceae	Nerium	Nerium oleander	Sunny	Heliophyte	Moist	Park	Shrub (>2m)	10-15cm	117.7	Flowering	Loamy	Brown	29.17	11.87	47.47	27.14	City Park	Longmo Lake	24.002	97.8347	730
T421	ZA_RS20	Tracheophyta	Magnoliopsida	Gentianales	Apocynaceae	Nerium	Nerium oleander	Sunny	Heliophyte	Moist	Park	Shrub (>2m)	10-15cm	110.4	Flowering	Loamy	Brown	29.17	11.87	47.47	27.14	City Park	Longmo Lake	24.002	97.8347	730
T100	ZE_RS12	Tracheophyta	Magnoliopsida	Gentianales	Apocynaceae	Plumeria	Plumeria alba	Sunny	Heliophyte	Moist	Park	Tree (<10m)	0-5cm	128.8	Vegetative	Loamy	Brown	31.7	12.67	50.67	23.73	City Park	Nanmao Lake	24.0093	97.8702	719
T100	ZE_RS13	Tracheophyta	Magnoliopsida	Gentianales	Apocynaceae	Plumeria	Plumeria alba	Sunny	Heliophyte	Moist	Park	Tree (<10m)	0-5cm	125.6	Vegetative	Loamy	Brown	31.7	12.67	50.67	23.73	City Park	Nanmao Lake	24.0093	97.8702	719
T100	LJ_RS23	Tracheophyta	Magnoliopsida	Gentianales	Apocynaceae	Plumeria	Plumeria alba	Sunny	Heliophyte	Moist	Park	Tree (<10m)	0-5cm	101.2	Vegetative	Loamy	Brown	31.7	12.67	50.67	23.73	City Park	Nanmao Lake	24.0093	97.8702	719
T424	ZA_RS22	Tracheophyta	Magnoliopsida	Gentianales	Apocynaceae	Plumeria	Plumeria alba	Sunny	Heliophyte	Dry	Park	Tree (<10m)	5-10cm	122.7	Flowering	Loamy	Brown	32.17	12.83	51.33	27.1	City Park	Longmo Lake	24.0019	97.8354	730
T001	HB_RS19	Tracheophyta	Magnoliopsida	Gentianales	Apocynaceae	Plumeria	Plumeria rubra	Sunny	Heliophyte	Moist	Hillside	Tree (<10m)	5-10cm	102.6	Flowering	Loamy	Red	28.23	11.63	46.53	24.35	Botanical Garden	Botanical Garden	24.0698	97.8196	1112
T001	HB_RS24	Tracheophyta	Magnoliopsida	Gentianales	Apocynaceae	Plumeria	Plumeria rubra	Sunny	Heliophyte	Moist	Hillside	Tree (<10m)	5-10cm	108.5	Flowering	Loamy	Red	28.23	11.63	46.53	24.35	Botanical Garden	Botanical Garden	24.0698	97.8196	1112
T001	HB_RS23	Tracheophyta	Magnoliopsida	Gentianales	Apocynaceae	Plumeria	Plumeria rubra	Sunny	Heliophyte	Moist	Hillside	Tree (<10m)	5-10cm	100.1	Flowering	Loamy	Red	28.23	11.63	46.53	24.35	Botanical Garden	Botanical Garden	24.0698	97.8196	1112
T019	ZI_RS16	Tracheophyta	Magnoliopsida	Gentianales	Rubiaceae	Psychotria	Psychotria adenophylla	Sunny	Skiophyte	Moist	Hillside		5-10cm	44.9	Vegetative	Loamy	Brown	26.43	11	44	22	Botanical Garden	Botanical Garden	24.0701	97.8182	1094
T019	ZI_RS17	Tracheophyta	Magnoliopsida	Gentianales	Rubiaceae	Psychotria	Psychotria adenophylla	Sunny	Skiophyte	Moist	Hillside		5-10cm	104.5	Vegetative	Loamy	Brown	26.43	11	44	22	Botanical Garden	Botanical Garden	24.0701	97.8182	1094
T019	ZI_RS18	Tracheophyta	Magnoliopsida	Gentianales	Rubiaceae	Psychotria	Psychotria adenophylla	Sunny	Skiophyte	Moist	Hillside		5-10cm	71.3	Vegetative	Loamy	Brown	26.43	11	44	22	Botanical Garden	Botanical Garden	24.0701	97.8182	1094
E067	KA_RS15	Tracheophyta	Magnoliopsida	Gentianales	Rubiaceae	Psychotria	Psychotria asiatica	Shower	Skiophyte	Moist	Hillside	Shrub (<2m)	0-5cm	101.2	Vegetative	Loamy	Brown	24.5	10.37	41.5	15.08	Botanical Garden	Botanical Garden	24.0704	97.8184	1110
A041	FF_RS22	Tracheophyta	Magnoliopsida	Gentianales	Apocynaceae	Rauvolfia	Rauvolfia verticillata	Sunny	Skiophyte	Moist	Hillside	Shrub (<2m)	5-10cm	100.2	Vegetative	Loamy	Brown	32.43	12.93	51.73	22.91	Botanical Garden	Botanical Garden	24.0709	97.8184	1130
A041	FF_RS16	Tracheophyta	Magnoliopsida	Gentianales	Apocynaceae	Rauvolfia	Rauvolfia verticillata	Sunny	Skiophyte	Moist	Hillside	Shrub (<2m)	5-10cm	98.1	Vegetative	Loamy	Brown	32.43	12.93	51.73	22.91	Botanical Garden	Botanical Garden	24.0709	97.8184	1130
B073	XF_RS04	Tracheophyta	Magnoliopsida	Gentianales	Rubiaceae	Rubia	Rubia cordifolia	Sunny	Skiophyte	Moist	Hillside	Vine	5-10cm	100.1	Vegetative	Loamy	Brown	29.7	12.03	48.13	21.81	Botanical Garden	Botanical Garden	24.0715	97.8165	1120
T175	LJ_RS06	Tracheophyta	Magnoliopsida	Gentianales	Rubiaceae	Serissa	Serissa japonica	Sunny	Heliophyte	Moist	Park	Shrub (<2m)	0-5cm	101.8	Vegetative	Loamy	Brown					City Park	Nanmao Lake	24.009	97.8717	726
T175	LJ_RS05	Tracheophyta	Magnoliopsida	Gentianales	Rubiaceae	Serissa	Serissa japonica	Sunny	Heliophyte	Moist	Park	Shrub (<2m)	0-5cm	101.5	Vegetative	Loamy	Brown					City Park	Nanmao Lake	24.009	97.8717	726
T175	LJ_RS04	Tracheophyta	Magnoliopsida	Gentianales	Rubiaceae	Serissa	Serissa japonica	Sunny	Heliophyte	Moist	Park	Shrub (<2m)	0-5cm	102	Vegetative	Loamy	Brown					City Park	Nanmao Lake	24.009	97.8717	726
C018	KG_RS09	Tracheophyta	Magnoliopsida	Gentianales	Rubiaceae	Serissa	Serissa serissoides	Sunny	Skiophyte	Moist	Reserve	Shrub (<2m)	0-5cm	103.7	Flowering	Loamy	Brown	34.53	13.57	54.27	18.56	Moli Rainforest	Moli Rainforest	24.107	97.9847	836
T168	LF_RS08	Tracheophyta	Magnoliopsida	Gentianales	Apocynaceae	Telosma	Telosma cordata	Sunny	Heliophyte	Dry	Park	Shrub (<2m)	0-5cm	106.9	Vegetative	Loamy	Brown	21	9.27	37.07	23.56	City Park	Nanmao Lake	24.011	97.87	727
B101	KB_RS22	Tracheophyta	Magnoliopsida	Gentianales	Rubiaceae	Uncaria	Uncaria rhynchophylla	Sunny	Skiophyte	Moist	Hillside	Vine	5-10cm	178.8	Vegetative	Loamy	Brown	22.53	9.8	39.2	17.64	Botanical Garden	Botanical Garden	24.0699	97.8177	1113
T034	LR_RS20	Tracheophyta	Magnoliopsida	Gentianales	Apocynaceae	Vincetoxicum	Vincetoxicum arenicola	Sunny	Skiophyte	Moist	Hillside	Vine	5-10cm	97.9	Vegetative	Loamy	Brown					Botanical Garden	Botanical Garden	24.0704	97.818	1118
T034	LR_RS21	Tracheophyta	Magnoliopsida	Gentianales	Apocynaceae	Vincetoxicum	Vincetoxicum arenicola	Sunny	Skiophyte	Moist	Hillside	Vine	5-10cm	96.8	Vegetative	Loamy	Brown					Botanical Garden	Botanical Garden	24.0704	97.818	1118
T034	LR_RS19	Tracheophyta	Magnoliopsida	Gentianales	Apocynaceae	Vincetoxicum	Vincetoxicum arenicola	Sunny	Skiophyte	Moist	Hillside	Vine	5-10cm	70.5	Vegetative	Loamy	Brown					Botanical Garden	Botanical Garden	24.0704	97.818	1118
T254	FI_RS04	Tracheophyta	Magnoliopsida	Gentianales	Apocynaceae	Vincetoxicum	Vincetoxicum arenicola	Sunny	Skiophyte	Moist	Reserve	Vine	0-5cm	48.4	Flowering	Loamy	Brown	34.3	13.5	54	21.35	Moli Rainforest	Moli Rainforest	24.109	97.9869	813
T254	FI_RS02	Tracheophyta	Magnoliopsida	Gentianales	Apocynaceae	Vincetoxicum	Vincetoxicum arenicola	Sunny	Skiophyte	Moist	Reserve	Vine	0-5cm	63.6	Flowering	Loamy	Brown	34.3	13.5	54	21.35	Moli Rainforest	Moli Rainforest	24.109	97.9869	813
T254	FI_RS03	Tracheophyta	Magnoliopsida	Gentianales	Apocynaceae	Vincetoxicum	Vincetoxicum arenicola	Sunny	Skiophyte	Moist	Reserve	Vine	0-5cm	113.7	Flowering	Loamy	Brown	34.3	13.5	54	21.35	Moli Rainforest	Moli Rainforest	24.109	97.9869	813
B136	ZF_RS20	Tracheophyta	Magnoliopsida	Gentianales	Rubiaceae	Wendlandia	Wendlandia uvariifolia	Sunny	Skiophyte	Moist	Hillside	Tree (<10m)	5-10cm	128.4	Vegetative	Loamy	Brown	31.33	12.57	50.27	22.83	Botanical Garden	Botanical Garden	24.0686	97.8209	1072
E044	XC_RS06	Tracheophyta	Magnoliopsida	Gentianales	Apocynaceae	Wrightia	Wrightia pubescens	Shower	Skiophyte	Moist	Hillside	Tree (<10m)	0-5cm	93.8	Vegetative	Loamy	Brown	40	15.3	60.53	18.21	Botanical Garden	Botanical Garden	24.0701	97.82	1098
T327	LC_RS10	Tracheophyta	Ginkgoopsida	Ginkgoales	Ginkgoaceae	Ginkgo	Ginkgo biloba	Sunny	Heliophyte	Moist	Park	Tree (<10m)	5-10cm	110.1	Vegetative	Loamy	Brown	15.7	7.6	30.4	20.89	City Park	Longmo Lake	24.0028	97.8433	730
T007	XB_RS17	Tracheophyta	Gnetopsida	Gnetales	Gnetaceae	Gnetum	Gnetum cleistostachyum	Sunny	Heliophyte	Moist	Hillside	Vine	5-10cm	97.9	Vegetative	Loamy	Brown	36.7	14.23	56.93	25.47	Botanical Garden	Botanical Garden	24.0692	97.8209	1110
T007	XB_RS19	Tracheophyta	Gnetopsida	Gnetales	Gnetaceae	Gnetum	Gnetum cleistostachyum	Sunny	Heliophyte	Moist	Hillside	Vine	5-10cm	96.3	Vegetative	Loamy	Brown	36.7	14.23	56.93	25.47	Botanical Garden	Botanical Garden	24.0692	97.8209	1110
T007	XB_RS18	Tracheophyta	Gnetopsida	Gnetales	Gnetaceae	Gnetum	Gnetum cleistostachyum	Sunny	Heliophyte	Moist	Hillside	Vine	5-10cm	105.7	Vegetative	Loamy	Brown	36.7	14.23	56.93	25.47	Botanical Garden	Botanical Garden	24.0692	97.8209	1110
B092	XE_RS12	Tracheophyta	Gnetopsida	Gnetales	Gnetaceae	Gnetum	Gnetum montanum	Sunny	Skiophyte	Moist	Hillside	Vine	0-5cm	111.1	Vegetative	Loamy	Brown	36.03	14.07	56.27	22.1	Botanical Garden	Botanical Garden	24.07	97.8175	1132
E037	XC_RS01	Tracheophyta	Magnoliopsida	Lamiales	Lamiaceae	Clerodendrum	Clerodendrum chinense	Shower	Skiophyte	Moist	Hillside	Shrub (<2m)	0-5cm	94	Fruiting	Loamy	Brown	33.73	13.5	53.2	17.58	Botanical Garden	Botanical Garden	24.0704	97.8199	1092
B034	HE_RS03	Tracheophyta	Magnoliopsida	Lamiales	Lamiaceae	Clerodendrum	Clerodendrum griffithianum	Sunny	Skiophyte	Moist	Hillside	Shrub (>2m)	5-10cm	76.8	Flowering	Loamy	Brown	31.5	12.6	50.4	21.02	Botanical Garden	Botanical Garden	24.0695	97.8188	1109
T288	ZH_RS24	Tracheophyta	Magnoliopsida	Lamiales	Lamiaceae	Clerodendrum	Clerodendrum griffithianum	Sunny	Heliophyte	Moist	Reserve	Shrub (>2m)	5-10cm	104.7	Flowering	Loamy	Brown	25.37	10.67	42.67	19.81	Moli Rainforest	Moli Rainforest	24.1129	97.9842	860
T155	FH_RS09	Tracheophyta	Magnoliopsida	Lamiales	Lamiaceae	Clerodendrum	Clerodendrum thomsoniae	Sunny	Heliophyte	Moist	Park	Shrub (<2m)	5-10cm	106.3	Vegetative	Loamy	Brown	27.6	11.37	45.47	28.79	City Park	Nanmao Lake	24.011	97.8714	731
B058	KC_RS09	Tracheophyta	Magnoliopsida	Lamiales	Lamiaceae	Clerodendrum	Clerodendrum wallichii	Sunny	Skiophyte	Moist	Hillside	Tree (<10m)	0-5cm	102.2	Vegetative	Loamy	Brown	35.13	13.77	55.07	17.54	Botanical Garden	Botanical Garden	24.0711	97.817	1132
B058	KC_RS10	Tracheophyta	Magnoliopsida	Lamiales	Lamiaceae	Clerodendrum	Clerodendrum wallichii	Sunny	Skiophyte	Moist	Hillside	Tree (<10m)	0-5cm	103.9	Vegetative	Loamy	Brown	35.13	13.77	55.07	17.54	Botanical Garden	Botanical Garden	24.0711	97.817	1132
B058	KC_RS08	Tracheophyta	Magnoliopsida	Lamiales	Lamiaceae	Clerodendrum	Clerodendrum wallichii	Sunny	Skiophyte	Moist	Hillside	Tree (<10m)	0-5cm	107.6	Vegetative	Loamy	Brown	35.13	13.77	55.07	17.54	Botanical Garden	Botanical Garden	24.0711	97.817	1132
B070	HD_RS15	Tracheophyta	Magnoliopsida	Lamiales	Lamiaceae	Clerodendrum	Clerodendrum wallichii	Sunny	Skiophyte	Moist	Hillside	Tree (<10m)	5-10cm	106.1	Flowering	Loamy	Brown	32.13	12.83	51.33	20.87	Botanical Garden	Botanical Garden	24.0718	97.8163	1119
T260	CC_RS12	Tracheophyta	Magnoliopsida	Lamiales	Lamiaceae	Clerodendrum	Clerodendrum wallichii	Sunny	Skiophyte	Moist	Reserve	Tree (<10m)	5-10cm	121.9	Flowering	Loamy	Brown	34.2	13.47	53.87	26.56	Moli Rainforest	Moli Rainforest	24.11	97.9859	813
T260	CC_RS11	Tracheophyta	Magnoliopsida	Lamiales	Lamiaceae	Clerodendrum	Clerodendrum wallichii	Sunny	Skiophyte	Moist	Reserve	Tree (<10m)	5-10cm	103.5	Flowering	Loamy	Brown	34.2	13.47	53.87	26.56	Moli Rainforest	Moli Rainforest	24.11	97.9859	813
T260	CC_RS10	Tracheophyta	Magnoliopsida	Lamiales	Lamiaceae	Clerodendrum	Clerodendrum wallichii	Sunny	Skiophyte	Moist	Reserve	Tree (<10m)	5-10cm	110.5	Flowering	Loamy	Brown	34.2	13.47	53.87	26.56	Moli Rainforest	Moli Rainforest	24.11	97.9859	813
C032	XG_RS15	Tracheophyta	Magnoliopsida	Lamiales	Lamiaceae	Colebrookea	Colebrookea oppositifolia	Sunny	Skiophyte	Moist	Reserve	Shrub (<2m)	0-5cm	99.1	Vegetative	Loamy	Brown	26.4	11	44	22.12	Moli Rainforest	Moli Rainforest	24.1056	97.9821	838
C032	XG_RS14	Tracheophyta	Magnoliopsida	Lamiales	Lamiaceae	Colebrookea	Colebrookea oppositifolia	Sunny	Skiophyte	Moist	Reserve	Shrub (<2m)	0-5cm	100.9	Vegetative	Loamy	Brown	26.4	11	44	22.12	Moli Rainforest	Moli Rainforest	24.1056	97.9821	838
C032	XG_RS13	Tracheophyta	Magnoliopsida	Lamiales	Lamiaceae	Colebrookea	Colebrookea oppositifolia	Sunny	Skiophyte	Moist	Reserve	Shrub (<2m)	0-5cm	102	Vegetative	Loamy	Brown	26.4	11	44	22.12	Moli Rainforest	Moli Rainforest	24.1056	97.9821	838
T308	ZH_RS19	Tracheophyta	Magnoliopsida	Lamiales	Lamiaceae	Colebrookea	Colebrookea oppositifolia	Sunny	Skiophyte	Moist	Reserve	Shrub (>2m)	5-10cm	129.1	Vegetative	Loamy	Brown	20.8	9.47	36.93	19.75	Moli Rainforest	Moli Rainforest	24.1155	97.9804	841
A008	FF_RS06	Tracheophyta	Magnoliopsida	Lamiales	Verbenaceae	Duranta	Duranta erecta	Sunny	Heliophyte	Moist	Hillside	Shrub (<2m)	0-5cm	106.5	Vegetative	Loamy	Red	16.8	7.93	31.73	20.37	Botanical Garden	Botanical Garden	24.0693	97.8198	1111
A008	FF_RS19	Tracheophyta	Magnoliopsida	Lamiales	Verbenaceae	Duranta	Duranta erecta	Sunny	Heliophyte	Moist	Hillside	Shrub (<2m)	0-5cm	97.3	Vegetative	Loamy	Red	16.8	7.93	31.73	20.37	Botanical Garden	Botanical Garden	24.0693	97.8198	1111
A008	FF_RS10	Tracheophyta	Magnoliopsida	Lamiales	Verbenaceae	Duranta	Duranta erecta	Sunny	Heliophyte	Moist	Hillside	Shrub (<2m)	0-5cm	107.3	Vegetative	Loamy	Red	16.8	7.93	31.73	20.37	Botanical Garden	Botanical Garden	24.0693	97.8198	1111
T131	LG_RS19	Tracheophyta	Magnoliopsida	Lamiales	Verbenaceae	Duranta	Duranta erecta	Sunny	Heliophyte	Moist	Park	Shrub (<2m)	0-5cm	100.6	Vegetative	Loamy	Brown	27	11.2	44.8	26.43	City Park	Nanmao Lake	24.0093	97.8698	724
T131	LG_RS17	Tracheophyta	Magnoliopsida	Lamiales	Verbenaceae	Duranta	Duranta erecta	Sunny	Heliophyte	Moist	Park	Shrub (<2m)	0-5cm	101.3	Vegetative	Loamy	Brown	27	11.2	44.8	26.43	City Park	Nanmao Lake	24.0093	97.8698	724
T131	LG_RS18	Tracheophyta	Magnoliopsida	Lamiales	Verbenaceae	Duranta	Duranta erecta	Sunny	Heliophyte	Moist	Park	Shrub (<2m)	0-5cm	102.9	Vegetative	Loamy	Brown	27	11.2	44.8	26.43	City Park	Nanmao Lake	24.0093	97.8698	724
T389	ZC_RS12	Tracheophyta	Magnoliopsida	Lamiales	Verbenaceae	Duranta	Duranta erecta	Sunny	Heliophyte	Moist	Park	Shrub (<2m)	0-5cm	53.1	Vegetative	Loamy	Red	22.87	9.87	39.47	28.52	City Park	Longmo Lake	24.0015	97.8417	730
T389	ZC_RS14	Tracheophyta	Magnoliopsida	Lamiales	Verbenaceae	Duranta	Duranta erecta	Sunny	Heliophyte	Moist	Park	Shrub (<2m)	0-5cm	80.2	Vegetative	Loamy	Red	22.87	9.87	39.47	28.52	City Park	Longmo Lake	24.0015	97.8417	730
T389	ZC_RS13	Tracheophyta	Magnoliopsida	Lamiales	Verbenaceae	Duranta	Duranta erecta	Sunny	Heliophyte	Moist	Park	Shrub (<2m)	0-5cm	69.9	Vegetative	Loamy	Red	22.87	9.87	39.47	28.52	City Park	Longmo Lake	24.0015	97.8417	730
E015	XC_RS23	Tracheophyta	Magnoliopsida	Lamiales	Lamiaceae	Elsholtzia	Elsholtzia rugulosa	Shower	Skiophyte	Moist	Hillside	Herb	0-5cm	103.6	Flowering	Loamy	Brown	29.5	12	48	19.52	Botanical Garden	Botanical Garden	24.071	97.8197	1083
C039	FC_RS16	Tracheophyta	Magnoliopsida	Lamiales	Lamiaceae	Eurysolen	Eurysolen gracilis	Sunny	Skiophyte	Moist	Reserve		0-5cm	101.2	Flowering	Loamy	Brown	33.9	13.37	53.47	20	Moli Rainforest	Moli Rainforest	24.1055	97.9813	840
C039	FC_RS17	Tracheophyta	Magnoliopsida	Lamiales	Lamiaceae	Eurysolen	Eurysolen gracilis	Sunny	Skiophyte	Moist	Reserve		0-5cm	102	Flowering	Loamy	Brown	33.9	13.37	53.47	20	Moli Rainforest	Moli Rainforest	24.1055	97.9813	840
C039	FC_RS20	Tracheophyta	Magnoliopsida	Lamiales	Lamiaceae	Eurysolen	Eurysolen gracilis	Sunny	Skiophyte	Moist	Reserve		0-5cm	101.2	Flowering	Loamy	Brown	33.9	13.37	53.47	20	Moli Rainforest	Moli Rainforest	24.1055	97.9813	840
T272	XI_RS03	Tracheophyta	Magnoliopsida	Lamiales	Acanthaceae	Fittonia	Fittonia albivenis	Sunny	Heliophyte	Moist	Reserve	Herb	0-5cm	117.3	Vegetative	Loamy	Brown	20.3	9.07	36.27	21.52	Moli Rainforest	Moli Rainforest	24.111	97.9853	832
T272	XI_RS05	Tracheophyta	Magnoliopsida	Lamiales	Acanthaceae	Fittonia	Fittonia albivenis	Sunny	Heliophyte	Moist	Reserve	Herb	0-5cm	102.1	Vegetative	Loamy	Brown	20.3	9.07	36.27	21.52	Moli Rainforest	Moli Rainforest	24.111	97.9853	832
T272	XI_RS04	Tracheophyta	Magnoliopsida	Lamiales	Acanthaceae	Fittonia	Fittonia albivenis	Sunny	Heliophyte	Moist	Reserve	Herb	0-5cm	100.6	Vegetative	Loamy	Brown	20.3	9.07	36.27	21.52	Moli Rainforest	Moli Rainforest	24.111	97.9853	832
T412	LE_RS24	Tracheophyta	Magnoliopsida	Lamiales	Acanthaceae	Fittonia	Fittonia albivenis	Sunny	Heliophyte	Moist	Park	Herb	0-5cm	103.8	Flowering	Loamy	Red	24.97	10.57	42.27	26.75	City Park	Longmo Lake	24.001	97.8353	730
T412	LE_RS23	Tracheophyta	Magnoliopsida	Lamiales	Acanthaceae	Fittonia	Fittonia albivenis	Sunny	Heliophyte	Moist	Park	Herb	0-5cm	100.9	Flowering	Loamy	Red	24.97	10.57	42.27	26.75	City Park	Longmo Lake	24.001	97.8353	730
T412	LE_RS22	Tracheophyta	Magnoliopsida	Lamiales	Acanthaceae	Fittonia	Fittonia albivenis	Sunny	Heliophyte	Moist	Park	Herb	0-5cm	104.6	Flowering	Loamy	Red	24.97	10.57	42.27	26.75	City Park	Longmo Lake	24.001	97.8353	730
T354	LD_RS09	Tracheophyta	Magnoliopsida	Lamiales	Lamiaceae	Gmelina	Gmelina arborea	Sunny	Heliophyte	Moist	Park	Tree (<10m)	5-10cm	103.4	Vegetative	Loamy	Brown	25.1	10.57	42.27	26.87	City Park	Longmo Lake	24.0025	97.8419	730
C082	FE_RS17	Tracheophyta	Magnoliopsida	Lamiales	Lamiaceae	Gomphostemma	Gomphostemma chinense	Sunny	Skiophyte	Moist	Reserve		0-5cm	103.6	Vegetative	Loamy	Brown	38.23	14.73	58.93	19.18	Moli Rainforest	Moli Rainforest	24.114	97.9828	900
E014	XC_RS22	Tracheophyta	Magnoliopsida	Lamiales	Lamiaceae	Isodon	Isodon eriocalyx	Shower	Skiophyte	Moist	Hillside	Herb	0-5cm	95.2	Flowering	Loamy	Brown	26.23	10.93	43.73	19.48	Botanical Garden	Botanical Garden	24.0709	97.8197	1083
T418	ZA_RS11	Tracheophyta	Magnoliopsida	Lamiales	Bignoniaceae	Jacaranda	Jacaranda mimosifolia	Sunny	Heliophyte	Moist	Park	Tree (<10m)	5-10cm	110.9	Vegetative	Loamy	Brown					City Park	Longmo Lake	24.0013	97.8347	730
T418	ZA_RS09	Tracheophyta	Magnoliopsida	Lamiales	Bignoniaceae	Jacaranda	Jacaranda mimosifolia	Sunny	Heliophyte	Moist	Park	Tree (<10m)	5-10cm	113.9	Vegetative	Loamy	Brown					City Park	Longmo Lake	24.0013	97.8347	730
T418	ZA_RS10	Tracheophyta	Magnoliopsida	Lamiales	Bignoniaceae	Jacaranda	Jacaranda mimosifolia	Sunny	Heliophyte	Moist	Park	Tree (<10m)	5-10cm	121.5	Vegetative	Loamy	Brown					City Park	Longmo Lake	24.0013	97.8347	730
E086	XD_RS19	Tracheophyta	Magnoliopsida	Lamiales	Oleaceae	Jasminum	Jasminum tonkinense	Shower	Skiophyte	Moist	Hillside	Shrub (<2m)	0-5cm	102.5	Vegetative	Loamy	Brown	30.93	12.43	49.73	16.86	Botanical Garden	Botanical Garden	24.0705	97.8173	1111
E034	KA_RS07	Tracheophyta	Magnoliopsida	Lamiales	Acanthaceae	Justicia	Justicia procumbens	Shower	Skiophyte	Moist	Hillside	Herb	0-5cm	101.2	Flowering	Loamy	Brown	32.6	12.97	51.87	17.56	Botanical Garden	Botanical Garden	24.0702	97.82	1092
T062	LV_RS09	Tracheophyta	Magnoliopsida	Lamiales	Verbenaceae	Lantana	Lantana camara	Sunny	Heliophyte	Moist	Hillside	Shrub (<2m)	0-5cm	48.2	Vegetative	Loamy	Brown	21.33	9.37	37.44	29.62	Wanding Town	Huihuan River	24.1277	98.0518	738
T062	LV_RS10	Tracheophyta	Magnoliopsida	Lamiales	Verbenaceae	Lantana	Lantana camara	Sunny	Heliophyte	Moist	Hillside	Shrub (<2m)	0-5cm	64.2	Vegetative	Loamy	Brown	21.33	9.37	37.44	29.62	Wanding Town	Huihuan River	24.1277	98.0518	738
T062	LV_RS08	Tracheophyta	Magnoliopsida	Lamiales	Verbenaceae	Lantana	Lantana camara	Sunny	Heliophyte	Moist	Hillside	Shrub (<2m)	0-5cm	53.9	Vegetative	Loamy	Brown	21.33	9.37	37.44	29.62	Wanding Town	Huihuan River	24.1277	98.0518	738
T068	LV_RS15	Tracheophyta	Magnoliopsida	Lamiales	Acanthaceae	Lepidagathis	Lepidagathis incurva	Sunny	Skiophyte	Moist	Hillside		0-5cm	28	Flowering	Loamy	Brown	34.93	13.73	54.93	27.5	Wanding Town	Huihuan River	24.1283	98.0518	738
E021	XD_RS04	Tracheophyta	Magnoliopsida	Lamiales	Oleaceae	Ligustrum	Ligustrum lucidum	Shower	Skiophyte	Moist	Hillside	Shrub (<2m)	0-5cm	102.3	Vegetative	Loamy	Brown	40.23	15.4	61.6	18.39	Botanical Garden	Botanical Garden	24.0707	97.8197	1080
T166	LH_RS04	Tracheophyta	Magnoliopsida	Lamiales	Oleaceae	Ligustrum	Ligustrum sinense	Sunny	Heliophyte	Dry	Park	Shrub (<2m)	5-10cm	102.9	Vegetative	Loamy	Brown	32.27	12.87	51.47	23.77	City Park	Nanmao Lake	24.0115	97.8707	723
T166	LH_RS03	Tracheophyta	Magnoliopsida	Lamiales	Oleaceae	Ligustrum	Ligustrum sinense	Sunny	Heliophyte	Dry	Park	Shrub (<2m)	5-10cm	107	Vegetative	Loamy	Brown	32.27	12.87	51.47	23.77	City Park	Nanmao Lake	24.0115	97.8707	723
T166	LF_RS06	Tracheophyta	Magnoliopsida	Lamiales	Oleaceae	Ligustrum	Ligustrum sinense	Sunny	Heliophyte	Dry	Park	Shrub (<2m)	5-10cm	102.3	Vegetative	Loamy	Brown	32.27	12.87	51.47	23.77	City Park	Nanmao Lake	24.0115	97.8707	723
E012	KA_RS23	Tracheophyta	Magnoliopsida	Lamiales	Linderniaceae	Lindernia	Lindernia ruellioides	Shower	Skiophyte	Moist	Hillside	Herb	0-5cm	102.7	Vegetative	Loamy	Brown	32.73	13	52.6	19.39	Botanical Garden	Botanical Garden	24.0706	97.82	1071
B080	XF_RS11	Tracheophyta	Magnoliopsida	Lamiales	Acanthaceae	Mackaya	Mackaya neesiana	Sunny	Skiophyte	Moist	Hillside	Herb	5-10cm	101.2	Flowering	Loamy	Brown	36.7	14.27	57.07	21.14	Botanical Garden	Botanical Garden	24.0723	97.8166	1138
B080	XF_RS12	Tracheophyta	Magnoliopsida	Lamiales	Acanthaceae	Mackaya	Mackaya neesiana	Sunny	Skiophyte	Moist	Hillside	Herb	5-10cm	97.1	Flowering	Loamy	Brown	36.7	14.27	57.07	21.14	Botanical Garden	Botanical Garden	24.0723	97.8166	1138
B080	XF_RS10	Tracheophyta	Magnoliopsida	Lamiales	Acanthaceae	Mackaya	Mackaya neesiana	Sunny	Skiophyte	Moist	Hillside	Herb	5-10cm	102.8	Flowering	Loamy	Brown	36.7	14.27	57.07	21.14	Botanical Garden	Botanical Garden	24.0723	97.8166	1138
C075	FE_RS01	Tracheophyta	Magnoliopsida	Lamiales	Acanthaceae	Mackaya	Mackaya neesiana	Sunny	Skiophyte	Moist	Reserve	Herb	0-5cm	46.7	Flowering	Loamy	Brown	33.77	13.33	53.53	19.37	Moli Rainforest	Moli Rainforest	24.1151	97.9819	900
C075	FE_RS19	Tracheophyta	Magnoliopsida	Lamiales	Acanthaceae	Mackaya	Mackaya neesiana	Sunny	Skiophyte	Moist	Reserve	Herb	0-5cm	66.6	Flowering	Loamy	Brown	33.77	13.33	53.53	19.37	Moli Rainforest	Moli Rainforest	24.1151	97.9819	900
C075	FE_RS16	Tracheophyta	Magnoliopsida	Lamiales	Acanthaceae	Mackaya	Mackaya neesiana	Sunny	Skiophyte	Moist	Reserve	Herb	0-5cm	101.9	Flowering	Loamy	Brown	33.77	13.33	53.53	19.37	Moli Rainforest	Moli Rainforest	24.1151	97.9819	900
A066	FF_RS09	Tracheophyta	Magnoliopsida	Lamiales	Oleaceae	Olea	Olea laxiflora	Sunny	Heliophyte	Moist	Hillside	Shrub (<2m)	5-10cm	105.5	Vegetative	Loamy	Brown	36.27	14.17	56.53	21.21	Botanical Garden	Botanical Garden	24.0692	97.8207	1110
B017	ZF_RS09	Tracheophyta	Magnoliopsida	Lamiales	Bignoniaceae	Oroxylum	Oroxylum indicum	Sunny	Heliophyte	Dry	Hillside	Tree (>10m)	15-20cm	72.9	Vegetative	Loamy	Brown	29.9	12.13	48.53	18.04	Botanical Garden	Botanical Garden	24.0694	97.8199	1116
T151	FH_RS11	Tracheophyta	Magnoliopsida	Lamiales	Bignoniaceae	Oroxylum	Oroxylum indicum	Sunny	Heliophyte	Moist	Park	Tree (>10m)	10-15cm	105.5	Vegetative	Loamy	Brown					City Park	Nanmao Lake	24.0109	97.8712	731
T264	CC_RS21	Tracheophyta	Magnoliopsida	Lamiales	Bignoniaceae	Oroxylum	Oroxylum indicum	Sunny	Heliophyte	Moist	Reserve	Tree (<10m)	5-10cm	103.9	Vegetative	Loamy	Brown					Moli Rainforest	Moli Rainforest	24.1102	97.9858	829
T264	CC_RS20	Tracheophyta	Magnoliopsida	Lamiales	Bignoniaceae	Oroxylum	Oroxylum indicum	Sunny	Heliophyte	Moist	Reserve	Tree (<10m)	5-10cm	114.9	Vegetative	Loamy	Brown					Moli Rainforest	Moli Rainforest	24.1102	97.9858	829
T264	CC_RS19	Tracheophyta	Magnoliopsida	Lamiales	Bignoniaceae	Oroxylum	Oroxylum indicum	Sunny	Heliophyte	Moist	Reserve	Tree (<10m)	5-10cm	95.9	Vegetative	Loamy	Brown					Moli Rainforest	Moli Rainforest	24.1102	97.9858	829
A031	LS_RS18	Tracheophyta	Magnoliopsida	Lamiales	Oleaceae	Osmanthus	Osmanthus fragrans	Sunny	Heliophyte	Moist	Hillside	Shrub (<2m)	10-15cm	102.9	Vegetative	Loamy	Brown	38.33	14.77	59.07	27.95	Botanical Garden	Botanical Garden	24.0699	97.8194	1118
A031	LS_RS19	Tracheophyta	Magnoliopsida	Lamiales	Oleaceae	Osmanthus	Osmanthus fragrans	Sunny	Heliophyte	Moist	Hillside	Shrub (<2m)	10-15cm	100.4	Vegetative	Loamy	Brown	38.33	14.77	59.07	27.95	Botanical Garden	Botanical Garden	24.0699	97.8194	1118
A031	LS_RS17	Tracheophyta	Magnoliopsida	Lamiales	Oleaceae	Osmanthus	Osmanthus fragrans	Sunny	Heliophyte	Moist	Hillside	Shrub (<2m)	10-15cm	105.8	Vegetative	Loamy	Brown	38.33	14.77	59.07	27.95	Botanical Garden	Botanical Garden	24.0699	97.8194	1118
T212	FJ_RS18	Tracheophyta	Magnoliopsida	Lamiales	Oleaceae	Osmanthus	Osmanthus fragrans	Sunny	Heliophyte	Moist	Park	Shrub (<2m)	10-15cm	97.2	Flowering	Loamy	Brown	28.1	11.57	46.27	26.18	City Park	Nanmao Lake	24.0113	97.8726	730
T212	FJ_RS22	Tracheophyta	Magnoliopsida	Lamiales	Oleaceae	Osmanthus	Osmanthus fragrans	Sunny	Heliophyte	Moist	Park	Shrub (<2m)	10-15cm	122.4	Flowering	Loamy	Brown	28.1	11.57	46.27	26.18	City Park	Nanmao Lake	24.0113	97.8726	730
T212	FJ_RS16	Tracheophyta	Magnoliopsida	Lamiales	Oleaceae	Osmanthus	Osmanthus fragrans	Sunny	Heliophyte	Moist	Park	Shrub (<2m)	10-15cm	100.3	Flowering	Loamy	Brown	28.1	11.57	46.27	26.18	City Park	Nanmao Lake	24.0113	97.8726	730
T144	KH_RS11	Tracheophyta	Magnoliopsida	Lamiales	Paulowniaceae	Paulownia	Paulownia tomentosa	Sunny	Heliophyte	Dry	Park	Tree (<10m)	5-10cm	114.6	Fruiting	Loamy	Brown	19.77	8.87	35.47	22.41	City Park	Nanmao Lake	24.0108	97.8713	720
B099	KB_RS19	Tracheophyta	Magnoliopsida	Lamiales	Acanthaceae	Phlogacanthus	Phlogacanthus curviflorus	Sunny	Skiophyte	Moist	Hillside	Shrub (<2m)	5-10cm	103.8	Vegetative	Loamy	Brown	35.17	17.1	55.73	17.08	Botanical Garden	Botanical Garden	24.0699	97.8177	1113
B099	KB_RS14	Tracheophyta	Magnoliopsida	Lamiales	Acanthaceae	Phlogacanthus	Phlogacanthus curviflorus	Sunny	Skiophyte	Moist	Hillside	Shrub (<2m)	5-10cm	111.3	Vegetative	Loamy	Brown	35.17	17.1	55.73	17.08	Botanical Garden	Botanical Garden	24.0699	97.8177	1113
B099	KB_RS12	Tracheophyta	Magnoliopsida	Lamiales	Acanthaceae	Phlogacanthus	Phlogacanthus curviflorus	Sunny	Skiophyte	Moist	Hillside	Shrub (<2m)	5-10cm	110.3	Vegetative	Loamy	Brown	35.17	17.1	55.73	17.08	Botanical Garden	Botanical Garden	24.0699	97.8177	1113
D006	LU_RS07	Tracheophyta	Magnoliopsida	Lamiales	Plantaginaceae	Plantago	Plantago depressa	Sunny	Skiophyte	Moist	Hillside	Herb	0-5cm	95.3	Vegetative	Loamy	Brown	22.27	9.67	38.67	21.02	Botanical Garden	Botanical Garden	24.0685	97.8213	1094
C037	FC_RS03	Tracheophyta	Magnoliopsida	Lamiales	Lamiaceae	Pogostemon	Pogostemon glaber	Sunny	Skiophyte	Moist	Reserve	Herb	0-5cm	110.1	Fruiting	Loamy	Brown	27.6	11.37	45.47	20.58	Moli Rainforest	Moli Rainforest	24.1056	97.9815	840
A044	KI_RS01	Tracheophyta	Magnoliopsida	Lamiales	Lamiaceae	Premna	Premna szemaoensis	Sunny	Heliophyte	Moist	Hillside	Tree (<10m)	5-10cm	26.5	Vegetative	Loamy	Brown	29.13	11.87	47.47	26.08	Botanical Garden	Botanical Garden	24.0711	97.8182	1135
C004	HF_RS08	Tracheophyta	Magnoliopsida	Lamiales	Lamiaceae	Pseudocaryopteris	Pseudocaryopteris paniculata	Sunny	Skiophyte	Moist	Reserve	Shrub (<2m)	0-5cm	70.3	Vegetative	Loamy	Brown	26.47	11.03	44.13	18	Moli Rainforest	Moli Rainforest	24.1078	97.9862	822
B059	KC_RS11	Tracheophyta	Magnoliopsida	Lamiales	Gesneriaceae	Rhynchotechum	Rhynchotechum ellipticum	Sunny	Skiophyte	Moist	Hillside	Shrub (<2m)	5-10cm	99.1	Vegetative	Loamy	Brown	30.43	12.33	49.2	17.35	Botanical Garden	Botanical Garden	24.0708	97.8173	1132
B059	KC_RS01	Tracheophyta	Magnoliopsida	Lamiales	Gesneriaceae	Rhynchotechum	Rhynchotechum ellipticum	Sunny	Skiophyte	Moist	Hillside	Shrub (<2m)	5-10cm	101.1	Vegetative	Loamy	Brown	30.43	12.33	49.2	17.35	Botanical Garden	Botanical Garden	24.0708	97.8173	1132
B059	KC_RS05	Tracheophyta	Magnoliopsida	Lamiales	Gesneriaceae	Rhynchotechum	Rhynchotechum ellipticum	Sunny	Skiophyte	Moist	Hillside	Shrub (<2m)	5-10cm	146.5	Vegetative	Loamy	Brown	30.43	12.33	49.2	17.35	Botanical Garden	Botanical Garden	24.0708	97.8173	1132
C001	HF_RS01	Tracheophyta	Magnoliopsida	Lamiales	Acanthaceae	Ruellia	Ruellia simplex	Sunny	Heliophyte	Moist	Reserve	Herb	0-5cm	70.8	Vegetative	Loamy	Brown	31.63	12.67	50.67	18.27	Moli Rainforest	Moli Rainforest	24.1078	97.9863	822
T333	ZB_RS01	Tracheophyta	Magnoliopsida	Lamiales	Acanthaceae	Ruellia	Ruellia simplex	Sunny	Heliophyte	Moist	Park	Herb	5-10cm	137.6	Flowering	Loamy	Brown	16.37	7.8	31.2	25.44	City Park	Longmo Lake	24.0023	97.8427	730
T411	LE_RS20	Tracheophyta	Magnoliopsida	Lamiales	Lamiaceae	Salvia	Salvia japonica	Sunny	Heliophyte	Moist	Park	Herb	0-5cm	100.9	Flowering	Loamy	Red	28.17	11.53	46.13	26.54	City Park	Longmo Lake	24.0011	97.8352	730
T411	ZC_RS24	Tracheophyta	Magnoliopsida	Lamiales	Lamiaceae	Salvia	Salvia japonica	Sunny	Heliophyte	Moist	Park	Herb	0-5cm	87.2	Flowering	Loamy	Red	28.17	11.53	46.13	26.54	City Park	Longmo Lake	24.0011	97.8352	730
T411	LE_RS21	Tracheophyta	Magnoliopsida	Lamiales	Lamiaceae	Salvia	Salvia japonica	Sunny	Heliophyte	Moist	Park	Herb	0-5cm	104.9	Flowering	Loamy	Red	28.17	11.53	46.13	26.54	City Park	Longmo Lake	24.0011	97.8352	730
A055	KH_RS12	Tracheophyta	Magnoliopsida	Lamiales	Carlemanniaceae	Silvianthus	Silvianthus bracteatus	Sunny	Skiophyte	Moist	Hillside	Shrub (<2m)	0-5cm	107	Flowering	Loamy	Brown	32.23	12.87	51.47	21.36	Botanical Garden	Botanical Garden	24.0716	97.8168	1132
A055	KH_RS13	Tracheophyta	Magnoliopsida	Lamiales	Carlemanniaceae	Silvianthus	Silvianthus bracteatus	Sunny	Skiophyte	Moist	Hillside	Shrub (<2m)	0-5cm	100.4	Flowering	Loamy	Brown	32.23	12.87	51.47	21.36	Botanical Garden	Botanical Garden	24.0716	97.8168	1132
A055	KH_RS14	Tracheophyta	Magnoliopsida	Lamiales	Carlemanniaceae	Silvianthus	Silvianthus bracteatus	Sunny	Skiophyte	Moist	Hillside	Shrub (<2m)	0-5cm	116.6	Flowering	Loamy	Brown	32.23	12.87	51.47	21.36	Botanical Garden	Botanical Garden	24.0716	97.8168	1132
T295	CB_RS21	Tracheophyta	Magnoliopsida	Lamiales	Carlemanniaceae	Silvianthus	Silvianthus bracteatus	Sunny	Skiophyte	Moist	Reserve	Shrub (<2m)	0-5cm	116.5	Flowering	Loamy	Brown	27.53	11.37	45.47	16.2	Moli Rainforest	Moli Rainforest	24.1143	97.9826	871
T295	CB_RS22	Tracheophyta	Magnoliopsida	Lamiales	Carlemanniaceae	Silvianthus	Silvianthus bracteatus	Sunny	Skiophyte	Moist	Reserve	Shrub (<2m)	0-5cm	118.2	Flowering	Loamy	Brown	27.53	11.37	45.47	16.2	Moli Rainforest	Moli Rainforest	24.1143	97.9826	871
T295	CB_RS06	Tracheophyta	Magnoliopsida	Lamiales	Carlemanniaceae	Silvianthus	Silvianthus bracteatus	Sunny	Skiophyte	Moist	Reserve	Shrub (<2m)	0-5cm	106.9	Flowering	Loamy	Brown	27.53	11.37	45.47	16.2	Moli Rainforest	Moli Rainforest	24.1143	97.9826	871
T194	XJ_RS03	Tracheophyta	Magnoliopsida	Lamiales	Bignoniaceae	Spathodea	Spathodea campanulata	Shower	Heliophyte	Moist	Park	Tree (<10m)	0-5cm	105.4	Flowering	Loamy	Brown	22.63	9.8	39.2	25.25	City Park	Nanmao Lake	24.0123	97.8698	716
T194	XJ_RS01	Tracheophyta	Magnoliopsida	Lamiales	Bignoniaceae	Spathodea	Spathodea campanulata	Shower	Heliophyte	Moist	Park	Tree (<10m)	0-5cm	98.6	Flowering	Loamy	Brown	22.63	9.8	39.2	25.25	City Park	Nanmao Lake	24.0123	97.8698	716
T194	XJ_RS02	Tracheophyta	Magnoliopsida	Lamiales	Bignoniaceae	Spathodea	Spathodea campanulata	Shower	Heliophyte	Moist	Park	Tree (<10m)	0-5cm	101.9	Flowering	Loamy	Brown	22.63	9.8	39.2	25.25	City Park	Nanmao Lake	24.0123	97.8698	716
T392	ZD_RS15	Tracheophyta	Magnoliopsida	Lamiales	Bignoniaceae	Spathodea	Spathodea campanulata	Sunny	Heliophyte	Moist	Park	Tree (<10m)	0-5cm	117.5	Flowering	Loamy	Brown	29	11.83	47.33	17.83	City Park	Longmo Lake	24.0007	97.8424	730
T392	ZD_RS13	Tracheophyta	Magnoliopsida	Lamiales	Bignoniaceae	Spathodea	Spathodea campanulata	Sunny	Heliophyte	Moist	Park	Tree (<10m)	0-5cm	105.2	Flowering	Loamy	Brown	29	11.83	47.33	17.83	City Park	Longmo Lake	24.0007	97.8424	730
T392	ZD_RS14	Tracheophyta	Magnoliopsida	Lamiales	Bignoniaceae	Spathodea	Spathodea campanulata	Sunny	Heliophyte	Moist	Park	Tree (<10m)	0-5cm	104.3	Flowering	Loamy	Brown	29	11.83	47.33	17.83	City Park	Longmo Lake	24.0007	97.8424	730
B081	XF_RS14	Tracheophyta	Magnoliopsida	Lamiales	Acanthaceae	Strobilanthes	Strobilanthes auriculata	Sunny	Skiophyte	Moist	Hillside	Herb	5-10cm	99.4	Vegetative	Loamy	Brown	31.13	12.5	49.87	21.15	Botanical Garden	Botanical Garden	24.073	97.8168	1138
B081	XF_RS13	Tracheophyta	Magnoliopsida	Lamiales	Acanthaceae	Strobilanthes	Strobilanthes auriculata	Sunny	Skiophyte	Moist	Hillside	Herb	5-10cm	104.8	Vegetative	Loamy	Brown	31.13	12.5	49.87	21.15	Botanical Garden	Botanical Garden	24.073	97.8168	1138
B081	XF_RS15	Tracheophyta	Magnoliopsida	Lamiales	Acanthaceae	Strobilanthes	Strobilanthes auriculata	Sunny	Skiophyte	Moist	Hillside	Herb	5-10cm	98	Vegetative	Loamy	Brown	31.13	12.5	49.87	21.15	Botanical Garden	Botanical Garden	24.073	97.8168	1138
B049	LU_RS12	Tracheophyta	Magnoliopsida	Lamiales	Acanthaceae	Strobilanthes	Strobilanthes divaricatus	Sunny	Skiophyte	Moist	Hillside	Herb	0-5cm	79	Vegetative	Loamy	Brown	35.8	12.9	51.6	16.37	Botanical Garden	Botanical Garden	24.0701	97.8182	1125
T234	CC_RS07	Tracheophyta	Magnoliopsida	Lamiales	Lamiaceae	Tectona	Tectona grandis	Sunny	Heliophyte	Moist	Park	Tree (<10m)	0-5cm	110.7	Vegetative	Loamy	Brown	32.4	12.9	51.6	28.43	City Park	Nanmao Lake	24.0119	97.8702	730
T234	CC_RS06	Tracheophyta	Magnoliopsida	Lamiales	Lamiaceae	Tectona	Tectona grandis	Sunny	Heliophyte	Moist	Park	Tree (<10m)	0-5cm	102.7	Vegetative	Loamy	Brown	32.4	12.9	51.6	28.43	City Park	Nanmao Lake	24.0119	97.8702	730
T234	CC_RS08	Tracheophyta	Magnoliopsida	Lamiales	Lamiaceae	Tectona	Tectona grandis	Sunny	Heliophyte	Moist	Park	Tree (<10m)	0-5cm	114.8	Vegetative	Loamy	Brown	32.4	12.9	51.6	28.43	City Park	Nanmao Lake	24.0119	97.8702	730
C035	FC_RS01	Tracheophyta	Magnoliopsida	Lamiales	Lamiaceae	Vitex	Vitex burmensis	Sunny	Skiophyte	Moist	Reserve	Tree (>10m)	0-5cm	107	Vegetative	Loamy	Brown	40.5	15.47	61.87	21.33	Moli Rainforest	Moli Rainforest	24.1055	97.9816	840
C035	FC_RS05	Tracheophyta	Magnoliopsida	Lamiales	Lamiaceae	Vitex	Vitex burmensis	Sunny	Skiophyte	Moist	Reserve	Tree (>10m)	0-5cm	107.2	Vegetative	Loamy	Brown	40.5	15.47	61.87	21.33	Moli Rainforest	Moli Rainforest	24.1055	97.9816	840
C035	FC_RS02	Tracheophyta	Magnoliopsida	Lamiales	Lamiaceae	Vitex	Vitex burmensis	Sunny	Skiophyte	Moist	Reserve	Tree (>10m)	0-5cm	103.7	Vegetative	Loamy	Brown	40.5	15.47	61.87	21.33	Moli Rainforest	Moli Rainforest	24.1055	97.9816	840
T292	ZH_RS05	Tracheophyta	Magnoliopsida	Lamiales	Lamiaceae	Vitex	Vitex burmensis	Sunny	Heliophyte	Moist	Reserve	Tree (>10m)	0-5cm	34.9	Vegetative	Loamy	Brown	30.83	12.4	49.6	16.56	Moli Rainforest	Moli Rainforest	24.1139	97.9828	885
T292	ZH_RS06	Tracheophyta	Magnoliopsida	Lamiales	Lamiaceae	Vitex	Vitex burmensis	Sunny	Heliophyte	Moist	Reserve	Tree (>10m)	0-5cm	42.6	Vegetative	Loamy	Brown	30.83	12.4	49.6	16.56	Moli Rainforest	Moli Rainforest	24.1139	97.9828	885
T292	CB_RS10	Tracheophyta	Magnoliopsida	Lamiales	Lamiaceae	Vitex	Vitex burmensis	Sunny	Heliophyte	Moist	Reserve	Tree (>10m)	0-5cm	49.7	Vegetative	Loamy	Brown	30.83	12.4	49.6	16.56	Moli Rainforest	Moli Rainforest	24.1139	97.9828	885
A003	LP_RS23	Tracheophyta	Magnoliopsida	Laurales	Lauraceae	Alseodaphnopsis	Alseodaphnopsis petiolaris	Sunny	Heliophyte	Moist	Hillside	Tree (<10m)	5-10cm	100.4	Vegetative	Loamy	Brown	26.9	11.13	44.53	23.81	Botanical Garden	Botanical Garden	24.0699	97.818	1117
A003	LP_RS21	Tracheophyta	Magnoliopsida	Laurales	Lauraceae	Alseodaphnopsis	Alseodaphnopsis petiolaris	Sunny	Heliophyte	Moist	Hillside	Tree (<10m)	5-10cm	100.6	Vegetative	Loamy	Brown	26.9	11.13	44.53	23.81	Botanical Garden	Botanical Garden	24.0699	97.818	1117
A003	LP_RS22	Tracheophyta	Magnoliopsida	Laurales	Lauraceae	Alseodaphnopsis	Alseodaphnopsis petiolaris	Sunny	Heliophyte	Moist	Hillside	Tree (<10m)	5-10cm	101.8	Vegetative	Loamy	Brown	26.9	11.13	44.53	23.81	Botanical Garden	Botanical Garden	24.0699	97.818	1117
T294	CB_RS09	Tracheophyta	Magnoliopsida	Laurales	Lauraceae	Alseodaphnopsis	Alseodaphnopsis petiolaris	Sunny	Heliophyte	Moist	Reserve	Tree (>10m)	5-10cm	98.8	Vegetative	Loamy	Brown					Moli Rainforest	Moli Rainforest	24.1144	97.9829	871
T294	KF_RS19	Tracheophyta	Magnoliopsida	Laurales	Lauraceae	Alseodaphnopsis	Alseodaphnopsis petiolaris	Sunny	Heliophyte	Moist	Reserve	Tree (>10m)	5-10cm	141.4	Vegetative	Loamy	Brown					Moli Rainforest	Moli Rainforest	24.1144	97.9829	871
T294	CB_RS13	Tracheophyta	Magnoliopsida	Laurales	Lauraceae	Alseodaphnopsis	Alseodaphnopsis petiolaris	Sunny	Heliophyte	Moist	Reserve	Tree (>10m)	5-10cm	103.4	Vegetative	Loamy	Brown					Moli Rainforest	Moli Rainforest	24.1144	97.9829	871
B027	KD_RS11	Tracheophyta	Magnoliopsida	Laurales	Lauraceae	Cinnamomum	Cinnamomum japonicum	Sunny	Heliophyte	Moist	Hillside	Tree (<10m)	0-5cm	42.4	Vegetative	Loamy	Brown	26.13	10.93	43.73	26.95	Botanical Garden	Botanical Garden	24.0693	97.8197	1112
B027	KD_RS13	Tracheophyta	Magnoliopsida	Laurales	Lauraceae	Cinnamomum	Cinnamomum japonicum	Sunny	Heliophyte	Moist	Hillside	Tree (<10m)	0-5cm	29.6	Vegetative	Loamy	Brown	26.13	10.93	43.73	26.95	Botanical Garden	Botanical Garden	24.0693	97.8197	1112
B027	KD_RS12	Tracheophyta	Magnoliopsida	Laurales	Lauraceae	Cinnamomum	Cinnamomum japonicum	Sunny	Heliophyte	Moist	Hillside	Tree (<10m)	0-5cm	24.2	Vegetative	Loamy	Brown	26.13	10.93	43.73	26.95	Botanical Garden	Botanical Garden	24.0693	97.8197	1112
T104	LK_RS04	Tracheophyta	Magnoliopsida	Laurales	Lauraceae	Cinnamomum	Cinnamomum longepaniculatum	Sunny	Heliophyte	Moist	Park	Tree (<10m)	5-10cm	104.5	Vegetative	Loamy	Brown	28.73	11.73	46.93	19.93	City Park	Nanmao Lake	24.0094	97.8694	719
T104	LK_RS05	Tracheophyta	Magnoliopsida	Laurales	Lauraceae	Cinnamomum	Cinnamomum longepaniculatum	Sunny	Heliophyte	Moist	Park	Tree (<10m)	5-10cm	103.2	Vegetative	Loamy	Brown	28.73	11.73	46.93	19.93	City Park	Nanmao Lake	24.0094	97.8694	719
T104	LK_RS03	Tracheophyta	Magnoliopsida	Laurales	Lauraceae	Cinnamomum	Cinnamomum longepaniculatum	Sunny	Heliophyte	Moist	Park	Tree (<10m)	5-10cm	102.6	Vegetative	Loamy	Brown	28.73	11.73	46.93	19.93	City Park	Nanmao Lake	24.0094	97.8694	719
E088	XD_RS21	Tracheophyta	Magnoliopsida	Laurales	Lauraceae	Cinnamomum	Cinnamomum pauciflorum	Shower	Skiophyte	Moist	Hillside	Tree (<10m)	5-10cm	102.7	Vegetative	Loamy	Brown	36.37	14.17	56.67	17.04	Botanical Garden	Botanical Garden	24.0705	97.8172	1111
T203	KF_RS01	Tracheophyta	Magnoliopsida	Laurales	Lauraceae	Cinnamomum	Cinnamomum tamala	Shower	Heliophyte	Moist	Park	Tree (<10m)	5-10cm	235.9	Vegetative	Loamy	Brown	18.33	8.43	33.73	25.75	City Park	Nanmao Lake	24.0114	97.8723	732
T203	KF_RS10	Tracheophyta	Magnoliopsida	Laurales	Lauraceae	Cinnamomum	Cinnamomum tamala	Shower	Heliophyte	Moist	Park	Tree (<10m)	5-10cm	269.7	Vegetative	Loamy	Brown	18.33	8.43	33.73	25.75	City Park	Nanmao Lake	24.0114	97.8723	732
T203	KF_RS09	Tracheophyta	Magnoliopsida	Laurales	Lauraceae	Cinnamomum	Cinnamomum tamala	Shower	Heliophyte	Moist	Park	Tree (<10m)	5-10cm	399.3	Vegetative	Loamy	Brown	18.33	8.43	33.73	25.75	City Park	Nanmao Lake	24.0114	97.8723	732
T282	FA_RS06	Tracheophyta	Magnoliopsida	Laurales	Lauraceae	Cryptocarya	Cryptocarya chinensis	Sunny	Heliophyte	Moist	Reserve	Tree (>10m)	0-5cm	99.8	Vegetative	Loamy	Brown	29.63	12.03	48.13	21.75	Moli Rainforest	Moli Rainforest	24.1129	97.9844	860
T282	CA_RS10	Tracheophyta	Magnoliopsida	Laurales	Lauraceae	Cryptocarya	Cryptocarya chinensis	Sunny	Heliophyte	Moist	Reserve	Tree (>10m)	0-5cm	118.6	Vegetative	Loamy	Brown	29.63	12.03	48.13	21.75	Moli Rainforest	Moli Rainforest	24.1129	97.9844	860
T282	FA_RS09	Tracheophyta	Magnoliopsida	Laurales	Lauraceae	Cryptocarya	Cryptocarya chinensis	Sunny	Heliophyte	Moist	Reserve	Tree (>10m)	0-5cm	103.6	Vegetative	Loamy	Brown	29.63	12.03	48.13	21.75	Moli Rainforest	Moli Rainforest	24.1129	97.9844	860
T282	FA_RS07	Tracheophyta	Magnoliopsida	Laurales	Lauraceae	Cryptocarya	Cryptocarya chinensis	Sunny	Heliophyte	Moist	Reserve	Tree (>10m)	0-5cm	71.5	Vegetative	Loamy	Brown	29.63	12.03	48.13	21.75	Moli Rainforest	Moli Rainforest	24.1129	97.9844	860
T082	HA_RS09	Tracheophyta	Magnoliopsida	Laurales	Hernandiaceae	Illigera	Illigera grandiflora	Sunny	Heliophyte	Moist	Hillside	Vine	10-15cm	64.8	Vegetative	Loamy	Brown	31.33	12.57	50.27	24.91	Wanding Town	Huihuan River	24.1285	98.0505	773
B009	ZF_RS02	Tracheophyta	Magnoliopsida	Laurales	Lauraceae	Litsea	Litsea glutinosa	Sunny	Skiophyte	Moist	Hillside	Tree (<10m)	5-10cm	35.6	Vegetative	Loamy	Brown	29.7	12.07	48.27	15.39	Botanical Garden	Botanical Garden	24.0695	97.8199	1112
B009	ZF_RS01	Tracheophyta	Magnoliopsida	Laurales	Lauraceae	Litsea	Litsea glutinosa	Sunny	Skiophyte	Moist	Hillside	Tree (<10m)	5-10cm	75.9	Vegetative	Loamy	Brown	29.7	12.07	48.27	15.39	Botanical Garden	Botanical Garden	24.0695	97.8199	1112
T193	FJ_RS08	Tracheophyta	Magnoliopsida	Laurales	Lauraceae	Litsea	Litsea glutinosa	Sunny	Heliophyte	Moist	Park	Tree (<10m)	10-15cm	91.8	Vegetative	Loamy	Brown	29.27	11.93	47.73	24.08	City Park	Nanmao Lake	24.012	97.8688	725
B056	KC_RS17	Tracheophyta	Magnoliopsida	Laurales	Lauraceae	Litsea	Litsea monopetala	Sunny	Skiophyte	Moist	Hillside	Tree (<10m)	5-10cm	101.6	Vegetative	Loamy	Brown	21.27	9.33	37.33	17.16	Botanical Garden	Botanical Garden	24.0708	97.8175	1112
C100	FE_RS21	Tracheophyta	Magnoliopsida	Laurales	Lauraceae	Litsea	Litsea monopetala	Sunny	Skiophyte	Moist	Reserve	Tree (<10m)	0-5cm	86.3	Vegetative	Loamy	Brown	36.97	14.33	57.33	23.14	Moli Rainforest	Moli Rainforest	24.1114	97.9855	838
T233	FC_RS18	Tracheophyta	Magnoliopsida	Laurales	Lauraceae	Litsea	Litsea monopetala	Sunny	Heliophyte	Moist	Park	Tree (<10m)	5-10cm	99.4	Vegetative	Loamy	Brown	33.83	13.37	53.47	28.2	City Park	Nanmao Lake	24.0118	97.8708	730
E001	XC_RS11	Tracheophyta	Magnoliopsida	Laurales	Lauraceae	Litsea	Litsea pungens	Shower	Heliophyte	Moist	Hillside	Tree (<10m)	5-10cm	94.2	Vegetative	Loamy	Brown	31.73	12.7	50.8	18.1	Botanical Garden	Botanical Garden	24.0706	97.8201	1076
B007	ZG_RS08	Tracheophyta	Magnoliopsida	Laurales	Lauraceae	Machilus	Machilus rufipes	Sunny	Heliophyte	Moist	Hillside	Tree (>10m)	15-20cm	105.7	Fruiting	Loamy	Brown	28.47	11.67	46.67	14.87	Botanical Garden	Botanical Garden	24.0696	97.8198	1112
T123	LI_RS21	Tracheophyta	Magnoliopsida	Laurales	Lauraceae	Machilus	Machilus rufipes	Sunny	Skiophyte	Moist	Park	Tree (<10m)	0-5cm	34.7	Vegetative	Loamy	Brown	33.63	13.27	53.07	27.23	City Park	Nanmao Lake	24.01	97.8736	729
T123	LI_RS19	Tracheophyta	Magnoliopsida	Laurales	Lauraceae	Machilus	Machilus rufipes	Sunny	Skiophyte	Moist	Park	Tree (<10m)	0-5cm	88.7	Vegetative	Loamy	Brown	33.63	13.27	53.07	27.23	City Park	Nanmao Lake	24.01	97.8736	729
T123	LI_RS20	Tracheophyta	Magnoliopsida	Laurales	Lauraceae	Machilus	Machilus rufipes	Sunny	Skiophyte	Moist	Park	Tree (<10m)	0-5cm	103.2	Vegetative	Loamy	Brown	33.63	13.27	53.07	27.23	City Park	Nanmao Lake	24.01	97.8736	729
B020	HE_RS24	Tracheophyta	Magnoliopsida	Laurales	Lauraceae	Machilus	Machilus salicina	Sunny	Skiophyte	Dry	Hillside	Tree (<10m)	5-10cm	93.4	Vegetative	Loamy	Brown	22.5	9.77	39.07	17.79	Botanical Garden	Botanical Garden	24.0694	97.8197	1116
A069	FF_RS15	Tracheophyta	Magnoliopsida	Laurales	Lauraceae	Phoebe	Phoebe puwenensis	Sunny	Heliophyte	Moist	Hillside	Tree (<10m)	5-10cm	100.9	Vegetative	Loamy	Brown	30.57	12.33	49.33	20.89	Botanical Garden	Botanical Garden	24.0693	97.8207	1110
A069	FF_RS07	Tracheophyta	Magnoliopsida	Laurales	Lauraceae	Phoebe	Phoebe puwenensis	Sunny	Heliophyte	Moist	Hillside	Tree (<10m)	5-10cm	97.9	Vegetative	Loamy	Brown	30.57	12.33	49.33	20.89	Botanical Garden	Botanical Garden	24.0693	97.8207	1110
A069	FF_RS04	Tracheophyta	Magnoliopsida	Laurales	Lauraceae	Phoebe	Phoebe puwenensis	Sunny	Heliophyte	Moist	Hillside	Tree (<10m)	5-10cm	54.6	Vegetative	Loamy	Brown	30.57	12.33	49.33	20.89	Botanical Garden	Botanical Garden	24.0693	97.8207	1110
T120	LI_RS12	Tracheophyta	Magnoliopsida	Laurales	Lauraceae	Phoebe	Phoebe zhennan	Sunny	Skiophyte	Moist	Park	Tree (<10m)	5-10cm	53.3	Vegetative	Loamy	Brown	24.2	10.3	41.2	27.43	City Park	Nanmao Lake	24.0093	97.8693	733
T120	LI_RS10	Tracheophyta	Magnoliopsida	Laurales	Lauraceae	Phoebe	Phoebe zhennan	Sunny	Skiophyte	Moist	Park	Tree (<10m)	5-10cm	68.7	Vegetative	Loamy	Brown	24.2	10.3	41.2	27.43	City Park	Nanmao Lake	24.0093	97.8693	733
T120	LI_RS11	Tracheophyta	Magnoliopsida	Laurales	Lauraceae	Phoebe	Phoebe zhennan	Sunny	Skiophyte	Moist	Park	Tree (<10m)	5-10cm	108.3	Vegetative	Loamy	Brown	24.2	10.3	41.2	27.43	City Park	Nanmao Lake	24.0093	97.8693	733
B111	KB_RS02	Tracheophyta	Liliopsida	Liliales	Smilacaceae	Smilax	Smilax lanceifolia	Sunny	Skiophyte	Moist	Hillside	Shrub (<2m)	0-5cm	129.3	Vegetative	Loamy	Brown	36.8	14.33	57.33	18.76	Botanical Garden	Botanical Garden	24.0697	97.8178	1113
B111	KB_RS18	Tracheophyta	Liliopsida	Liliales	Smilacaceae	Smilax	Smilax lanceifolia	Sunny	Skiophyte	Moist	Hillside	Shrub (<2m)	0-5cm	110.4	Vegetative	Loamy	Brown	36.8	14.33	57.33	18.76	Botanical Garden	Botanical Garden	24.0697	97.8178	1113
B111	KB_RS15	Tracheophyta	Liliopsida	Liliales	Smilacaceae	Smilax	Smilax lanceifolia	Sunny	Skiophyte	Moist	Hillside	Shrub (<2m)	0-5cm	101.9	Vegetative	Loamy	Brown	36.8	14.33	57.33	18.76	Botanical Garden	Botanical Garden	24.0697	97.8178	1113
E055	KA_RS01	Tracheophyta	Liliopsida	Liliales	Smilacaceae	Smilax	Smilax ocreata	Shower	Skiophyte	Moist	Hillside	Shrub (<2m)	0-5cm	99.7	Vegetative	Loamy	Brown	29.97	12.13	48.53	14.31	Botanical Garden	Botanical Garden	24.07	97.819	1122
T281	FA_RS10	Tracheophyta	Magnoliopsida	Magnoliales	Annonaceae	Alphonsea	Alphonsea monogyna	Sunny	Heliophyte	Moist	Reserve	Tree (<10m)	0-5cm	104.1	Vegetative	Loamy	Brown	34.07	13.4	53.6	23.41	Moli Rainforest	Moli Rainforest	24.1129	97.9837	871
T281	FA_RS08	Tracheophyta	Magnoliopsida	Magnoliales	Annonaceae	Alphonsea	Alphonsea monogyna	Sunny	Heliophyte	Moist	Reserve	Tree (<10m)	0-5cm	102.9	Vegetative	Loamy	Brown	34.07	13.4	53.6	23.41	Moli Rainforest	Moli Rainforest	24.1129	97.9837	871
T057	LP_RS11	Tracheophyta	Magnoliopsida	Magnoliales	Annonaceae	Annona	Annona squamosa	Sunny	Heliophyte	Moist	Nursery	Tree (<10m)	15-20cm	100.9	Vegetative	Loamy	Red	24.4	10.37	41.47	30.5	Wanding Town	Huihuan Village	24.1194	98.0467	739
B147	ZG_RS23	Tracheophyta	Magnoliopsida	Magnoliales	Annonaceae	Dasymaschalon	Dasymaschalon rostratum	Sunny	Skiophyte	Moist	Hillside	Tree (<10m)	5-10cm	82.1	Vegetative	Loamy	Brown	37	14.33	57.33	24.5	Botanical Garden	Botanical Garden	24.0685	97.8212	1094
B147	ZG_RS24	Tracheophyta	Magnoliopsida	Magnoliales	Annonaceae	Dasymaschalon	Dasymaschalon rostratum	Sunny	Skiophyte	Moist	Hillside	Tree (<10m)	5-10cm	74.1	Vegetative	Loamy	Brown	37	14.33	57.33	24.5	Botanical Garden	Botanical Garden	24.0685	97.8212	1094
B147	ZG_RS22	Tracheophyta	Magnoliopsida	Magnoliales	Annonaceae	Dasymaschalon	Dasymaschalon rostratum	Sunny	Skiophyte	Moist	Hillside	Tree (<10m)	5-10cm	100.7	Vegetative	Loamy	Brown	37	14.33	57.33	24.5	Botanical Garden	Botanical Garden	24.0685	97.8212	1094
B118	HC_RS17	Tracheophyta	Magnoliopsida	Magnoliales	Annonaceae	Disepalum	Disepalum plagioneurum	Sunny	Skiophyte	Moist	Hillside	Tree (<10m)	5-10cm	103.3	Vegetative	Loamy	Brown	30.63	12.37	49.47	18.93	Botanical Garden	Botanical Garden	24.0689	97.8187	1117
B118	HC_RS18	Tracheophyta	Magnoliopsida	Magnoliales	Annonaceae	Disepalum	Disepalum plagioneurum	Sunny	Skiophyte	Moist	Hillside	Tree (<10m)	5-10cm	107.6	Vegetative	Loamy	Brown	30.63	12.37	49.47	18.93	Botanical Garden	Botanical Garden	24.0689	97.8187	1117
B021	HE_RS23	Tracheophyta	Magnoliopsida	Magnoliales	Annonaceae	Fissistigma	Fissistigma polyanthum	Sunny	Skiophyte	Moist	Hillside	Vine	0-5cm	106.5	Vegetative	Loamy	Brown	32.4	12.9	51.6	21.85	Botanical Garden	Botanical Garden	24.0694	97.8196	1116
A043	FF_RS24	Tracheophyta	Magnoliopsida	Magnoliales	Myristicaceae	Horsfieldia	Horsfieldia amygdalina	Sunny	Heliophyte	Moist	Hillside	Tree (<10m)	5-10cm	99.4	Vegetative	Loamy	Brown	26.93	11.17	44.67	23.2	Botanical Garden	Botanical Garden	24.0711	97.8183	1135
A043	FF_RS01	Tracheophyta	Magnoliopsida	Magnoliales	Myristicaceae	Horsfieldia	Horsfieldia amygdalina	Sunny	Heliophyte	Moist	Hillside	Tree (<10m)	5-10cm	110.3	Vegetative	Loamy	Brown	26.93	11.17	44.67	23.2	Botanical Garden	Botanical Garden	24.0711	97.8183	1135
A043	FF_RS20	Tracheophyta	Magnoliopsida	Magnoliales	Myristicaceae	Horsfieldia	Horsfieldia amygdalina	Sunny	Heliophyte	Moist	Hillside	Tree (<10m)	5-10cm	99.6	Vegetative	Loamy	Brown	26.93	11.17	44.67	23.2	Botanical Garden	Botanical Garden	24.0711	97.8183	1135
A059	FG_RS14	Tracheophyta	Magnoliopsida	Magnoliales	Myristicaceae	Horsfieldia	Horsfieldia kingii	Sunny	Skiophyte	Moist	Hillside	Tree (<10m)	5-10cm	105.2	Vegetative	Loamy	Brown	31.57	12.63	50.53	19.35	Botanical Garden	Botanical Garden	24.0692	97.8206	1110
A059	FG_RS23	Tracheophyta	Magnoliopsida	Magnoliales	Myristicaceae	Horsfieldia	Horsfieldia kingii	Sunny	Skiophyte	Moist	Hillside	Tree (<10m)	5-10cm	99.9	Vegetative	Loamy	Brown	31.57	12.63	50.53	19.35	Botanical Garden	Botanical Garden	24.0692	97.8206	1110
A059	FG_RS15	Tracheophyta	Magnoliopsida	Magnoliales	Myristicaceae	Horsfieldia	Horsfieldia kingii	Sunny	Skiophyte	Moist	Hillside	Tree (<10m)	5-10cm	119.2	Vegetative	Loamy	Brown	31.57	12.63	50.53	19.35	Botanical Garden	Botanical Garden	24.0692	97.8206	1110
B109	KB_RS06	Tracheophyta	Magnoliopsida	Magnoliales	Myristicaceae	Horsfieldia	Horsfieldia kingii	Sunny	Skiophyte	Moist	Hillside	Tree (<10m)	5-10cm	104.2	Vegetative	Loamy	Brown	34.5	13.57	54.27	18.04	Botanical Garden	Botanical Garden	24.0698	97.8178	1113
B109	KB_RS05	Tracheophyta	Magnoliopsida	Magnoliales	Myristicaceae	Horsfieldia	Horsfieldia kingii	Sunny	Skiophyte	Moist	Hillside	Tree (<10m)	5-10cm	105.7	Vegetative	Loamy	Brown	34.5	13.57	54.27	18.04	Botanical Garden	Botanical Garden	24.0698	97.8178	1113
B109	KB_RS13	Tracheophyta	Magnoliopsida	Magnoliales	Myristicaceae	Horsfieldia	Horsfieldia kingii	Sunny	Skiophyte	Moist	Hillside	Tree (<10m)	5-10cm	113.2	Vegetative	Loamy	Brown	34.5	13.57	54.27	18.04	Botanical Garden	Botanical Garden	24.0698	97.8178	1113
T290	CB_RS08	Tracheophyta	Magnoliopsida	Magnoliales	Myristicaceae	Horsfieldia	Horsfieldia kingii	Sunny	Skiophyte	Moist	Reserve	Tree (<10m)	5-10cm	78.3	Vegetative	Loamy	Brown					Moli Rainforest	Moli Rainforest	24.1127	97.9835	877
T301	KE_RS05	Tracheophyta	Magnoliopsida	Magnoliales	Myristicaceae	Knema	Knema tenuinervia	Sunny	Skiophyte	Moist	Reserve	Tree (<10m)	10-15cm	232.4	Vegetative	Loamy	Brown	35.6	13.9	55.6	17.83	Moli Rainforest	Moli Rainforest	24.1154	97.9817	890
T301	KE_RS04	Tracheophyta	Magnoliopsida	Magnoliales	Myristicaceae	Knema	Knema tenuinervia	Sunny	Skiophyte	Moist	Reserve	Tree (<10m)	10-15cm	142	Vegetative	Loamy	Brown	35.6	13.9	55.6	17.83	Moli Rainforest	Moli Rainforest	24.1154	97.9817	890
T301	KE_RS06	Tracheophyta	Magnoliopsida	Magnoliales	Myristicaceae	Knema	Knema tenuinervia	Sunny	Skiophyte	Moist	Reserve	Tree (<10m)	10-15cm	177.6	Vegetative	Loamy	Brown	35.6	13.9	55.6	17.83	Moli Rainforest	Moli Rainforest	24.1154	97.9817	890
T122	LI_RS16	Tracheophyta	Magnoliopsida	Magnoliales	Magnoliaceae	Magnolia	Magnolia alba	Sunny	Heliophyte	Moist	Park	Tree (<10m)	5-10cm	99.1	Vegetative	Loamy	Brown	30.03	12.13	48.53	26.81	City Park	Nanmao Lake	24.0093	97.8697	733
T122	LI_RS17	Tracheophyta	Magnoliopsida	Magnoliales	Magnoliaceae	Magnolia	Magnolia alba	Sunny	Heliophyte	Moist	Park	Tree (<10m)	5-10cm	107.1	Vegetative	Loamy	Brown	30.03	12.13	48.53	26.81	City Park	Nanmao Lake	24.0093	97.8697	733
T122	LI_RS18	Tracheophyta	Magnoliopsida	Magnoliales	Magnoliaceae	Magnolia	Magnolia alba	Sunny	Heliophyte	Moist	Park	Tree (<10m)	5-10cm	99.7	Vegetative	Loamy	Brown	30.03	12.13	48.53	26.81	City Park	Nanmao Lake	24.0093	97.8697	733
T023	LR_RS01	Tracheophyta	Magnoliopsida	Magnoliales	Magnoliaceae	Magnolia	Magnolia baillonii	Sunny	Skiophyte	Moist	Hillside	Tree (<10m)	10-15cm	105.9	Vegetative	Loamy	Brown	29.27	11.9	47.6	22.15	Botanical Garden	Botanical Garden	24.0693	97.8206	1111
T150	FH_RS17	Tracheophyta	Magnoliopsida	Magnoliales	Magnoliaceae	Magnolia	Magnolia baillonii	Sunny	Heliophyte	Moist	Park	Tree (>10m)	0-5cm	100.6	Vegetative	Loamy	Brown	23.67	10.13	40.53	28.58	City Park	Nanmao Lake	24.011	97.8708	724
T150	FH_RS13	Tracheophyta	Magnoliopsida	Magnoliales	Magnoliaceae	Magnolia	Magnolia baillonii	Sunny	Heliophyte	Moist	Park	Tree (>10m)	0-5cm	121.8	Vegetative	Loamy	Brown	23.67	10.13	40.53	28.58	City Park	Nanmao Lake	24.011	97.8708	724
T150	FH_RS16	Tracheophyta	Magnoliopsida	Magnoliales	Magnoliaceae	Magnolia	Magnolia baillonii	Sunny	Heliophyte	Moist	Park	Tree (>10m)	0-5cm	104.4	Vegetative	Loamy	Brown	23.67	10.13	40.53	28.58	City Park	Nanmao Lake	24.011	97.8708	724
T014	LV_RS05	Tracheophyta	Magnoliopsida	Magnoliales	Magnoliaceae	Magnolia	Magnolia dandyi	Sunny	Skiophyte	Moist	Hillside	Tree (<10m)	15-20cm	107.7	Vegetative	Loamy	Brown	29.23	11.9	47.6	24.33	Botanical Garden	Botanical Garden	24.069	97.821	1110
B029	KD_RS16	Tracheophyta	Magnoliopsida	Magnoliales	Magnoliaceae	Magnolia	Magnolia insignis	Sunny	Skiophyte	Moist	Hillside	Tree (<10m)	0-5cm	134.6	Vegetative	Loamy	Brown	37.5	14.53	58.13	20.95	Botanical Garden	Botanical Garden	24.0694	97.8194	1112
A033	LS_RS13	Tracheophyta	Magnoliopsida	Magnoliales	Magnoliaceae	Magnolia	Magnolia laevifolia	Sunny	Heliophyte	Moist	Hillside	Shrub (<2m)	5-10cm	100.8	Vegetative	Loamy	Brown	48.87	18.13	72.53	25.31	Botanical Garden	Botanical Garden	24.0693	97.8208	1110
A034	LS_RS12	Tracheophyta	Magnoliopsida	Magnoliales	Annonaceae	Polyalthia	Polyalthia longifolia	Sunny	Heliophyte	Moist	Hillside	Tree (<10m)	15-20cm	104.6	Vegetative	Loamy	Brown	24.77	10.5	42	25	Botanical Garden	Botanical Garden	24.0698	97.8193	1120
A034	LS_RS11	Tracheophyta	Magnoliopsida	Magnoliales	Annonaceae	Polyalthia	Polyalthia longifolia	Sunny	Heliophyte	Moist	Hillside	Tree (<10m)	15-20cm	104.5	Vegetative	Loamy	Brown	24.77	10.5	42	25	Botanical Garden	Botanical Garden	24.0698	97.8193	1120
A034	LS_RS10	Tracheophyta	Magnoliopsida	Magnoliales	Annonaceae	Polyalthia	Polyalthia longifolia	Sunny	Heliophyte	Moist	Hillside	Tree (<10m)	15-20cm	103.6	Vegetative	Loamy	Brown	24.77	10.5	42	25	Botanical Garden	Botanical Garden	24.0698	97.8193	1120
T189	CA_RS03	Tracheophyta	Magnoliopsida	Magnoliales	Annonaceae	Polyalthia	Polyalthia longifolia	Sunny	Heliophyte	Moist	Park	Tree (<10m)	10-15cm	105.1	Vegetative	Loamy	Brown	30.4	12.27	49.07	22.7	City Park	Nanmao Lake	24.0097	97.8677	726
T189	CA_RS12	Tracheophyta	Magnoliopsida	Magnoliales	Annonaceae	Polyalthia	Polyalthia longifolia	Sunny	Heliophyte	Moist	Park	Tree (<10m)	10-15cm	101.3	Vegetative	Loamy	Brown	30.4	12.27	49.07	22.7	City Park	Nanmao Lake	24.0097	97.8677	726
T189	CA_RS01	Tracheophyta	Magnoliopsida	Magnoliales	Annonaceae	Polyalthia	Polyalthia longifolia	Sunny	Heliophyte	Moist	Park	Tree (<10m)	10-15cm	104.3	Vegetative	Loamy	Brown	30.4	12.27	49.07	22.7	City Park	Nanmao Lake	24.0097	97.8677	726
B022	HE_RS22	Tracheophyta	Magnoliopsida	Magnoliales	Annonaceae	Polyalthia	Polyalthia suberosa	Sunny	Skiophyte	Moist	Hillside	Tree (<10m)	10-15cm	42.1	Vegetative	Loamy	Brown	27.1	11.23	44.67	21.23	Botanical Garden	Botanical Garden	24.0694	97.8195	1116
C044	FD_RS07	Tracheophyta	Magnoliopsida	Magnoliales	Annonaceae	Polyalthia	Polyalthia suberosa	Sunny	Skiophyte	Moist	Reserve	Tree (>10m)	0-5cm	99.7	Vegetative	Loamy	Brown	37.4	14.5	58	20.7	Moli Rainforest	Moli Rainforest	24.1052	97.9809	842
T172	LG_RS05	Tracheophyta	Magnoliopsida	Malpighiales	Euphorbiaceae	Acalypha	Acalypha wilkesiana	Sunny	Heliophyte	Moist	Park	Shrub (<2m)	0-5cm	101.1	Flowering	Loamy	Brown	23.5	10.07	40.4	27.66	City Park	Nanmao Lake	24.0111	97.8699	721
T172	LG_RS20	Tracheophyta	Magnoliopsida	Malpighiales	Euphorbiaceae	Acalypha	Acalypha wilkesiana	Sunny	Heliophyte	Moist	Park	Shrub (<2m)	0-5cm	102.2	Flowering	Loamy	Brown	23.5	10.07	40.4	27.66	City Park	Nanmao Lake	24.0111	97.8699	721
T172	LG_RS04	Tracheophyta	Magnoliopsida	Malpighiales	Euphorbiaceae	Acalypha	Acalypha wilkesiana	Sunny	Heliophyte	Moist	Park	Shrub (<2m)	0-5cm	101.3	Flowering	Loamy	Brown	23.5	10.07	40.4	27.66	City Park	Nanmao Lake	24.0111	97.8699	721
B014	ZF_RS07	Tracheophyta	Magnoliopsida	Malpighiales	Euphorbiaceae	Alchornea	Alchornea trewioides	Sunny	Skiophyte	Dry	Hillside		0-5cm	104.4	Vegetative	Loamy	Brown	24.23	10.13	41.2	19.31	Botanical Garden	Botanical Garden	24.0695	97.8199	1116
C093	HF_RS24	Tracheophyta	Magnoliopsida	Malpighiales	Phyllanthaceae	Antidesma	Antidesma bunius	Sunny	Heliophyte	Moist	Reserve	Tree (<10m)	0-5cm	122.8	Vegetative	Loamy	Brown	34.2	13.5	54	23	Moli Rainforest	Moli Rainforest	24.111	97.9856	838
C093	HF_RS23	Tracheophyta	Magnoliopsida	Malpighiales	Phyllanthaceae	Antidesma	Antidesma bunius	Sunny	Heliophyte	Moist	Reserve	Tree (<10m)	0-5cm	82.8	Vegetative	Loamy	Brown	34.2	13.5	54	23	Moli Rainforest	Moli Rainforest	24.111	97.9856	838
C093	HF_RS22	Tracheophyta	Magnoliopsida	Malpighiales	Phyllanthaceae	Antidesma	Antidesma bunius	Sunny	Heliophyte	Moist	Reserve	Tree (<10m)	0-5cm	114.1	Vegetative	Loamy	Brown	34.2	13.5	54	23	Moli Rainforest	Moli Rainforest	24.111	97.9856	838
T118	KJ_RS21	Tracheophyta	Magnoliopsida	Malpighiales	Phyllanthaceae	Antidesma	Antidesma bunius	Sunny	Heliophyte	Moist	Park	Tree (<10m)	5-10cm	137.5	Vegetative	Loamy	Brown	34.23	13.47	53.87	22.95	City Park	Nanmao Lake	24.0098	97.8703	733
T118	KJ_RS23	Tracheophyta	Magnoliopsida	Malpighiales	Phyllanthaceae	Antidesma	Antidesma bunius	Sunny	Heliophyte	Moist	Park	Tree (<10m)	5-10cm	171.1	Vegetative	Loamy	Brown	34.23	13.47	53.87	22.95	City Park	Nanmao Lake	24.0098	97.8703	733
T118	KJ_RS22	Tracheophyta	Magnoliopsida	Malpighiales	Phyllanthaceae	Antidesma	Antidesma bunius	Sunny	Heliophyte	Moist	Park	Tree (<10m)	5-10cm	187.1	Vegetative	Loamy	Brown	34.23	13.47	53.87	22.95	City Park	Nanmao Lake	24.0098	97.8703	733
B146	ZG_RS19	Tracheophyta	Magnoliopsida	Malpighiales	Phyllanthaceae	Aporosa	Aporosa yunnanensis	Sunny	Skiophyte	Moist	Hillside		5-10cm	100.7	Vegetative	Loamy	Brown	37.53	14.57	58.27	25.02	Botanical Garden	Botanical Garden	24.0685	97.8212	1094
B146	ZG_RS20	Tracheophyta	Magnoliopsida	Malpighiales	Phyllanthaceae	Aporosa	Aporosa yunnanensis	Sunny	Skiophyte	Moist	Hillside		5-10cm	111.4	Vegetative	Loamy	Brown	37.53	14.57	58.27	25.02	Botanical Garden	Botanical Garden	24.0685	97.8212	1094
B146	ZG_RS21	Tracheophyta	Magnoliopsida	Malpighiales	Phyllanthaceae	Aporosa	Aporosa yunnanensis	Sunny	Skiophyte	Moist	Hillside		5-10cm	101.8	Vegetative	Loamy	Brown	37.53	14.57	58.27	25.02	Botanical Garden	Botanical Garden	24.0685	97.8212	1094
T119	LI_RS09	Tracheophyta	Magnoliopsida	Malpighiales	Phyllanthaceae	Baccaurea	Baccaurea ramiflora	Sunny	Heliophyte	Moist	Park	Tree (<10m)	5-10cm	66	Vegetative	Loamy	Brown	30.1	12.17	48.67	28.1	City Park	Nanmao Lake	24.0091	97.8695	733
T119	LI_RS08	Tracheophyta	Magnoliopsida	Malpighiales	Phyllanthaceae	Baccaurea	Baccaurea ramiflora	Sunny	Heliophyte	Moist	Park	Tree (<10m)	5-10cm	101.2	Vegetative	Loamy	Brown	30.1	12.17	48.67	28.1	City Park	Nanmao Lake	24.0091	97.8695	733
T119	LI_RS07	Tracheophyta	Magnoliopsida	Malpighiales	Phyllanthaceae	Baccaurea	Baccaurea ramiflora	Sunny	Heliophyte	Moist	Park	Tree (<10m)	5-10cm	103.4	Vegetative	Loamy	Brown	30.1	12.17	48.67	28.1	City Park	Nanmao Lake	24.0091	97.8695	733
T417	ZA_RS08	Tracheophyta	Magnoliopsida	Malpighiales	Phyllanthaceae	Bischofia	Bischofia javanica	Sunny	Heliophyte	Moist	Park	Tree (<10m)	0-5cm	73.8	Vegetative	Loamy	Red	40.37	15.47	61.87	26.77	City Park	Longmo Lake	24.0012	97.8344	730
T417	ZA_RS07	Tracheophyta	Magnoliopsida	Malpighiales	Phyllanthaceae	Bischofia	Bischofia javanica	Sunny	Heliophyte	Moist	Park	Tree (<10m)	0-5cm	92.5	Vegetative	Loamy	Red	40.37	15.47	61.87	26.77	City Park	Longmo Lake	24.0012	97.8344	730
T417	ZA_RS06	Tracheophyta	Magnoliopsida	Malpighiales	Phyllanthaceae	Bischofia	Bischofia javanica	Sunny	Heliophyte	Moist	Park	Tree (<10m)	0-5cm	101	Vegetative	Loamy	Red	40.37	15.47	61.87	26.77	City Park	Longmo Lake	24.0012	97.8344	730
E038	XC_RS02	Tracheophyta	Magnoliopsida	Malpighiales	Phyllanthaceae	Bischofia	Bischofia polycarpa	Shower	Skiophyte	Moist	Hillside	Tree (<10m)	0-5cm	100.5	Vegetative	Loamy	Brown	43.53	16.23	64.93	17.5	Botanical Garden	Botanical Garden	24.0704	97.8199	1092
T127	LF_RS01	Tracheophyta	Magnoliopsida	Malpighiales	Phyllanthaceae	Bischofia	Bischofia polycarpa	Sunny	Heliophyte	Moist	Park	Tree (<10m)	0-5cm	102.2	Vegetative	Loamy	Brown	30.43	12.3	49.2	27.6	City Park	Nanmao Lake	24.0097	97.8737	721
C087	FE_RS10	Tracheophyta	Magnoliopsida	Malpighiales	Phyllanthaceae	Breynia	Breynia androgyna	Sunny	Skiophyte	Moist	Reserve	Shrub (<2m)	5-10cm	102.3	Vegetative	Loamy	Brown	41.83	15.9	60.53	18.89	Moli Rainforest	Moli Rainforest	24.1138	97.9833	921
E045	XC_RS07	Tracheophyta	Magnoliopsida	Malpighiales	Phyllanthaceae	Breynia	Breynia macrantha	Shower	Skiophyte	Moist	Hillside		5-10cm	93.5	Vegetative	Loamy	Brown	37.83	14.6	58.4	14.85	Botanical Garden	Botanical Garden	24.0698	97.8193	1098
T296	FC_RS14	Tracheophyta	Magnoliopsida	Malpighiales	Calophyllaceae	Calophyllum	Calophyllum membranaceum	Sunny	Skiophyte	Moist	Reserve	Tree (<10m)	5-10cm	9.9	Vegetative	Loamy	Brown	29.27	11.9	47.6	16.62	Moli Rainforest	Moli Rainforest	24.1144	97.9828	881
C073	XH_RS13	Tracheophyta	Magnoliopsida	Malpighiales	Calophyllaceae	Calophyllum	Calophyllum polyanthum	Sunny	Skiophyte	Moist	Reserve	Tree (<10m)	5-10cm	43.8	Vegetative	Loamy	Brown	36.97	14.23	56	17.62	Moli Rainforest	Moli Rainforest	24.1154	97.9817	906
C073	XH_RS12	Tracheophyta	Magnoliopsida	Malpighiales	Calophyllaceae	Calophyllum	Calophyllum polyanthum	Sunny	Skiophyte	Moist	Reserve	Tree (<10m)	5-10cm	97.7	Vegetative	Loamy	Brown	36.97	14.23	56	17.62	Moli Rainforest	Moli Rainforest	24.1154	97.9817	906
C073	XH_RS11	Tracheophyta	Magnoliopsida	Malpighiales	Calophyllaceae	Calophyllum	Calophyllum polyanthum	Sunny	Skiophyte	Moist	Reserve	Tree (<10m)	5-10cm	73.3	Vegetative	Loamy	Brown	36.97	14.23	56	17.62	Moli Rainforest	Moli Rainforest	24.1154	97.9817	906
C020	KG_RS10	Tracheophyta	Magnoliopsida	Malpighiales	Rhizophoraceae	Carallia	Carallia brachiata	Sunny	Skiophyte	Moist	Reserve	Tree (>10m)	0-5cm	168.7	Vegetative	Loamy	Brown	39.03	15.03	60.13	19.08	Moli Rainforest	Moli Rainforest	24.1069	97.9844	836
C020	KG_RS11	Tracheophyta	Magnoliopsida	Malpighiales	Rhizophoraceae	Carallia	Carallia brachiata	Sunny	Skiophyte	Moist	Reserve	Tree (>10m)	0-5cm	162.1	Vegetative	Loamy	Brown	39.03	15.03	60.13	19.08	Moli Rainforest	Moli Rainforest	24.1069	97.9844	836
C020	KG_RS12	Tracheophyta	Magnoliopsida	Malpighiales	Rhizophoraceae	Carallia	Carallia brachiata	Sunny	Skiophyte	Moist	Reserve	Tree (>10m)	0-5cm	99.4	Vegetative	Loamy	Brown	39.03	15.03	60.13	19.08	Moli Rainforest	Moli Rainforest	24.1069	97.9844	836
T147	KH_RS01	Tracheophyta	Magnoliopsida	Malpighiales	Rhizophoraceae	Carallia	Carallia brachiata	Sunny	Heliophyte	Dry	Park	Tree (<10m)	5-10cm	26.5	Flowering	Loamy	Brown	25.33	10.67	42.67	22.29	City Park	Nanmao Lake	24.0121	97.8703	724
T147	KH_RS02	Tracheophyta	Magnoliopsida	Malpighiales	Rhizophoraceae	Carallia	Carallia brachiata	Sunny	Heliophyte	Dry	Park	Tree (<10m)	5-10cm	110.1	Flowering	Loamy	Brown	25.33	10.67	42.67	22.29	City Park	Nanmao Lake	24.0121	97.8703	724
T147	KH_RS03	Tracheophyta	Magnoliopsida	Malpighiales	Rhizophoraceae	Carallia	Carallia brachiata	Sunny	Heliophyte	Dry	Park	Tree (<10m)	5-10cm	104.1	Flowering	Loamy	Brown	25.33	10.67	42.67	22.29	City Park	Nanmao Lake	24.0121	97.8703	724
B117	HC_RS19	Tracheophyta	Magnoliopsida	Malpighiales	Euphorbiaceae	Cleidion	Cleidion brevipetiolatum	Sunny	Skiophyte	Moist	Hillside	Tree (<10m)	0-5cm	101.4	Vegetative	Loamy	Brown	36.03	14.07	56.27	19.2	Botanical Garden	Botanical Garden	24.069	97.8186	1117
T300	KE_RS03	Tracheophyta	Magnoliopsida	Malpighiales	Euphorbiaceae	Cleidion	Cleidion brevipetiolatum	Sunny	Heliophyte	Moist	Reserve	Tree (<10m)	0-5cm	57.9	Vegetative	Loamy	Brown	32.8	13	52	17.89	Moli Rainforest	Moli Rainforest	24.1152	97.982	890
T300	KE_RS02	Tracheophyta	Magnoliopsida	Malpighiales	Euphorbiaceae	Cleidion	Cleidion brevipetiolatum	Sunny	Heliophyte	Moist	Reserve	Tree (<10m)	0-5cm	61.8	Vegetative	Loamy	Brown	32.8	13	52	17.89	Moli Rainforest	Moli Rainforest	24.1152	97.982	890
T300	KE_RS01	Tracheophyta	Magnoliopsida	Malpighiales	Euphorbiaceae	Cleidion	Cleidion brevipetiolatum	Sunny	Heliophyte	Moist	Reserve	Tree (<10m)	0-5cm	80.8	Vegetative	Loamy	Brown	32.8	13	52	17.89	Moli Rainforest	Moli Rainforest	24.1152	97.982	890
A030	HB_RS17	Tracheophyta	Magnoliopsida	Malpighiales	Euphorbiaceae	Codiaeum	Codiaeum variegatum	Sunny	Heliophyte	Moist	Hillside	Shrub (<2m)	5-10cm	101.8	Vegetative	Loamy	Yellow	37.83	14.6	58.4	25.87	Botanical Garden	Botanical Garden	24.0696	97.8198	1112
A030	HB_RS16	Tracheophyta	Magnoliopsida	Malpighiales	Euphorbiaceae	Codiaeum	Codiaeum variegatum	Sunny	Heliophyte	Moist	Hillside	Shrub (<2m)	5-10cm	103.8	Vegetative	Loamy	Yellow	37.83	14.6	58.4	25.87	Botanical Garden	Botanical Garden	24.0696	97.8198	1112
A030	HB_RS15	Tracheophyta	Magnoliopsida	Malpighiales	Euphorbiaceae	Codiaeum	Codiaeum variegatum	Sunny	Heliophyte	Moist	Hillside	Shrub (<2m)	5-10cm	103.5	Vegetative	Loamy	Yellow	37.83	14.6	58.4	25.87	Botanical Garden	Botanical Garden	24.0696	97.8198	1112
T078	HA_RS05	Tracheophyta	Magnoliopsida	Malpighiales	Euphorbiaceae	Codiaeum	Codiaeum variegatum	Sunny	Skiophyte	Moist	Hillside	Shrub (>2m)	5-10cm	38.6	Vegetative	Sandy	Yellow	44.95	16.9	67.6	26.59	Wanding Town	Huihuan River	24.1283	98.0506	773
T186	KF_RS16	Tracheophyta	Magnoliopsida	Malpighiales	Euphorbiaceae	Codiaeum	Codiaeum variegatum	Sunny	Skiophyte	Dry	Park	Shrub (<2m)	0-5cm	84.9	Vegetative	Loamy	Brown	38	14.67	58.57	22.81	City Park	Nanmao Lake	24.0119	97.8687	724
T186	KF_RS23	Tracheophyta	Magnoliopsida	Malpighiales	Euphorbiaceae	Codiaeum	Codiaeum variegatum	Sunny	Skiophyte	Dry	Park	Shrub (<2m)	0-5cm	124.8	Vegetative	Loamy	Brown	38	14.67	58.57	22.81	City Park	Nanmao Lake	24.0119	97.8687	724
T186	KF_RS22	Tracheophyta	Magnoliopsida	Malpighiales	Euphorbiaceae	Codiaeum	Codiaeum variegatum	Sunny	Skiophyte	Dry	Park	Shrub (<2m)	0-5cm	116.8	Vegetative	Loamy	Brown	38	14.67	58.57	22.81	City Park	Nanmao Lake	24.0119	97.8687	724
T222	KE_RS09	Tracheophyta	Magnoliopsida	Malpighiales	Euphorbiaceae	Codiaeum	Codiaeum variegatum	Sunny	Heliophyte	Moist	Park	Shrub (>2m)	5-10cm	235.7	Vegetative	Loamy	Brown	13.87	7.03	28.13	30.41	City Park	Nanmao Lake	24.0115	97.8726	730
T222	KE_RS10	Tracheophyta	Magnoliopsida	Malpighiales	Euphorbiaceae	Codiaeum	Codiaeum variegatum	Sunny	Heliophyte	Moist	Park	Shrub (>2m)	5-10cm	281.3	Vegetative	Loamy	Brown	13.87	7.03	28.13	30.41	City Park	Nanmao Lake	24.0115	97.8726	730
T222	KE_RS14	Tracheophyta	Magnoliopsida	Malpighiales	Euphorbiaceae	Codiaeum	Codiaeum variegatum	Sunny	Heliophyte	Moist	Park	Shrub (>2m)	5-10cm	185.9	Vegetative	Loamy	Brown	13.87	7.03	28.13	30.41	City Park	Nanmao Lake	24.0115	97.8726	730
T338	ZB_RS06	Tracheophyta	Magnoliopsida	Malpighiales	Euphorbiaceae	Codiaeum	Codiaeum variegatum	Sunny	Skiophyte	Moist	Park	Shrub (<2m)	5-10cm	117.3	Vegetative	Loamy	Red	23.7	10.13	40.53	25.42	City Park	Longmo Lake	24.0022	97.8425	730
T376	ZD_RS04	Tracheophyta	Magnoliopsida	Malpighiales	Euphorbiaceae	Codiaeum	Codiaeum variegatum	Sunny	Skiophyte	Moist	Park	Shrub (<2m)	10-15cm	118	Vegetative	Loamy	Red	26.2	10.93	43.73	27.41	City Park	Longmo Lake	24.0035	97.8433	730
T376	ZD_RS06	Tracheophyta	Magnoliopsida	Malpighiales	Euphorbiaceae	Codiaeum	Codiaeum variegatum	Sunny	Skiophyte	Moist	Park	Shrub (<2m)	10-15cm	63.1	Vegetative	Loamy	Red	26.2	10.93	43.73	27.41	City Park	Longmo Lake	24.0035	97.8433	730
T376	ZD_RS05	Tracheophyta	Magnoliopsida	Malpighiales	Euphorbiaceae	Codiaeum	Codiaeum variegatum	Sunny	Skiophyte	Moist	Park	Shrub (<2m)	10-15cm	95.6	Vegetative	Loamy	Red	26.2	10.93	43.73	27.41	City Park	Longmo Lake	24.0035	97.8433	730
A060	FG_RS13	Tracheophyta	Magnoliopsida	Malpighiales	Euphorbiaceae	Croton	Croton tiglium	Sunny	Heliophyte	Moist	Hillside	Tree (<10m)	5-10cm	101.3	Vegetative	Loamy	Brown	33.13	13.17	52.67	19.75	Botanical Garden	Botanical Garden	24.0692	97.8208	1110
A060	KI_RS09	Tracheophyta	Magnoliopsida	Malpighiales	Euphorbiaceae	Croton	Croton tiglium	Sunny	Heliophyte	Moist	Hillside	Tree (<10m)	5-10cm	114.1	Vegetative	Loamy	Brown	33.13	13.17	52.67	19.75	Botanical Garden	Botanical Garden	24.0692	97.8208	1110
A060	FG_RS11	Tracheophyta	Magnoliopsida	Malpighiales	Euphorbiaceae	Croton	Croton tiglium	Sunny	Heliophyte	Moist	Hillside	Tree (<10m)	5-10cm	96.6	Vegetative	Loamy	Brown	33.13	13.17	52.67	19.75	Botanical Garden	Botanical Garden	24.0692	97.8208	1110
T137	FG_RS08	Tracheophyta	Magnoliopsida	Malpighiales	Euphorbiaceae	Euphorbia	Euphorbia cotinifolia	Sunny	Heliophyte	Moist	Park	Tree (<10m)	5-10cm	70.1	Vegetative	Loamy	Brown	22.07	9.63	38.53	19.95	City Park	Nanmao Lake	24.0109	97.8709	724
C063	FC_RS22	Tracheophyta	Magnoliopsida	Malpighiales	Euphorbiaceae	Euphorbia	Euphorbia pulcherrima	Sunny	Heliophyte	Moist	Reserve	Shrub (<2m)	5-10cm	104.3	Flowering	Loamy	Brown	28.2	11.57	46.27	17.73	Moli Rainforest	Moli Rainforest	24.1159	97.981	957
B032	KE_RS24	Tracheophyta	Magnoliopsida	Malpighiales	Euphorbiaceae	Excoecaria	Excoecaria cochinchinensis	Sunny	Skiophyte	Moist	Hillside	Shrub (<2m)	0-5cm	132.6	Flowering	Loamy	Brown	37.87	14.63	58.53	20.83	Botanical Garden	Botanical Garden	24.0694	97.8189	1110
B032	HE_RS02	Tracheophyta	Magnoliopsida	Malpighiales	Euphorbiaceae	Excoecaria	Excoecaria cochinchinensis	Sunny	Skiophyte	Moist	Hillside	Shrub (<2m)	0-5cm	72.6	Flowering	Loamy	Brown	37.87	14.63	58.53	20.83	Botanical Garden	Botanical Garden	24.0694	97.8189	1110
B032	KE_RS23	Tracheophyta	Magnoliopsida	Malpighiales	Euphorbiaceae	Excoecaria	Excoecaria cochinchinensis	Sunny	Skiophyte	Moist	Hillside	Shrub (<2m)	0-5cm	142.9	Flowering	Loamy	Brown	37.87	14.63	58.53	20.83	Botanical Garden	Botanical Garden	24.0694	97.8189	1110
T098	ZE_RS10	Tracheophyta	Magnoliopsida	Malpighiales	Euphorbiaceae	Excoecaria	Excoecaria cochinchinensis	Sunny	Skiophyte	Moist	Park	Shrub (<2m)	5-10cm	71.9	Vegetative	Loamy	Brown	34.07	13.4	53.6	22.29	City Park	Nanmao Lake	24.0091	97.8722	719
T098	ZE_RS08	Tracheophyta	Magnoliopsida	Malpighiales	Euphorbiaceae	Excoecaria	Excoecaria cochinchinensis	Sunny	Skiophyte	Moist	Park	Shrub (<2m)	5-10cm	105.7	Vegetative	Loamy	Brown	34.07	13.4	53.6	22.29	City Park	Nanmao Lake	24.0091	97.8722	719
T098	ZE_RS09	Tracheophyta	Magnoliopsida	Malpighiales	Euphorbiaceae	Excoecaria	Excoecaria cochinchinensis	Sunny	Skiophyte	Moist	Park	Shrub (<2m)	5-10cm	117.7	Vegetative	Loamy	Brown	34.07	13.4	53.6	22.29	City Park	Nanmao Lake	24.0091	97.8722	719
T312	FB_RS16	Tracheophyta	Magnoliopsida	Malpighiales	Euphorbiaceae	Excoecaria	Excoecaria cochinchinensis	Sunny	Heliophyte	Moist	Reserve	Shrub (<2m)	0-5cm	107.9	Vegetative	Loamy	Brown					Moli Rainforest	Moli Rainforest	24.1112	97.986	832
T312	FB_RS14	Tracheophyta	Magnoliopsida	Malpighiales	Euphorbiaceae	Excoecaria	Excoecaria cochinchinensis	Sunny	Heliophyte	Moist	Reserve	Shrub (<2m)	0-5cm	100.9	Vegetative	Loamy	Brown					Moli Rainforest	Moli Rainforest	24.1112	97.986	832
T312	FB_RS15	Tracheophyta	Magnoliopsida	Malpighiales	Euphorbiaceae	Excoecaria	Excoecaria cochinchinensis	Sunny	Heliophyte	Moist	Reserve	Shrub (<2m)	0-5cm	104.1	Vegetative	Loamy	Brown					Moli Rainforest	Moli Rainforest	24.1112	97.986	832
T153	FH_RS10	Tracheophyta	Magnoliopsida	Malpighiales	Phyllanthaceae	Flueggea	Flueggea virosa	Sunny	Heliophyte	Moist	Park	Tree (<10m)	5-10cm	109.1	Vegetative	Loamy	Brown	27.37	11.33	45.33	28.7	City Park	Nanmao Lake	24.0111	97.8705	731
A014	XA_RS13	Tracheophyta	Magnoliopsida	Malpighiales	Clusiaceae	Garcinia	Garcinia erythrosepala	Sunny	Heliophyte	Moist	Hillside	Tree (<10m)	5-10cm	199.4	Vegetative	Loamy	Red	29.77	12.13	48.27	24.31	Botanical Garden	Botanical Garden	24.0694	97.8199	1108
T149	KH_RS09	Tracheophyta	Magnoliopsida	Malpighiales	Clusiaceae	Garcinia	Garcinia pedunculata	Sunny	Heliophyte	Dry	Park	Tree (<10m)	5-10cm	114.1	Vegetative	Loamy	Brown	22.67	9.83	39.33	23.79	City Park	Nanmao Lake	24.0111	97.8707	724
A035	LS_RS09	Tracheophyta	Magnoliopsida	Malpighiales	Clusiaceae	Garcinia	Garcinia xanthochymus	Sunny	Heliophyte	Moist	Hillside	Tree (>10m)	5-10cm	109.3	Vegetative	Loamy	Brown	42.2	16	64	23.89	Botanical Garden	Botanical Garden	24.0693	97.8208	1110
A011	XA_RS01	Tracheophyta	Magnoliopsida	Malpighiales	Clusiaceae	Garcinia	Garcinia yunnanensis	Sunny	Heliophyte	Moist	Hillside	Tree (<10m)	5-10cm	197.9	Fruiting	Loamy	Brown	38.17	14.67	57.77	22.84	Botanical Garden	Botanical Garden	24.0694	97.8199	1108
A011	XA_RS16	Tracheophyta	Magnoliopsida	Malpighiales	Clusiaceae	Garcinia	Garcinia yunnanensis	Sunny	Heliophyte	Moist	Hillside	Tree (<10m)	5-10cm	155.1	Fruiting	Loamy	Brown	38.17	14.67	57.77	22.84	Botanical Garden	Botanical Garden	24.0694	97.8199	1108
A011	XA_RS15	Tracheophyta	Magnoliopsida	Malpighiales	Clusiaceae	Garcinia	Garcinia yunnanensis	Sunny	Heliophyte	Moist	Hillside	Tree (<10m)	5-10cm	232.2	Fruiting	Loamy	Brown	38.17	14.67	57.77	22.84	Botanical Garden	Botanical Garden	24.0694	97.8199	1108
B144	LU_RS24	Tracheophyta	Magnoliopsida	Malpighiales	Phyllanthaceae	Glochidion	Glochidion eriocarpum	Sunny	Skiophyte	Moist	Hillside	Shrub (<2m)	5-10cm	87.3	Vegetative	Loamy	Brown	30.3	12.23	48.93	25.7	Botanical Garden	Botanical Garden	24.0685	97.8211	1094
T071	XB_RS05	Tracheophyta	Magnoliopsida	Malpighiales	Phyllanthaceae	Glochidion	Glochidion puberum	Sunny	Skiophyte	Moist	Hillside	Shrub (<2m)	5-10cm	99	Fruiting	Loamy	Brown	39.9	15.3	61.2	27	Wanding Town	Huihuan River	24.1283	98.0518	738
F095	LH_RS14	Tracheophyta	Magnoliopsida	Malpighiales	Malpighiaceae	Hiptage	Hiptage candicans	Sunny	Heliophyte	Moist	Hillside		5-10cm	110.3	Vegetative	Loamy	Red	30.23	12.23	48.93	26.1	Wanding Town	Wanding Forest Park	24.0906	98.0589	1046
T114	KJ_RS12	Tracheophyta	Magnoliopsida	Malpighiales	Euphorbiaceae	Jatropha	Jatropha integerrima	Sunny	Skiophyte	Moist	Park	Shrub (<2m)	5-10cm	169.8	Flowering	Loamy	Brown	29.5	11.97	47.87	21.5	City Park	Nanmao Lake	24.0095	97.8704	733
T114	KJ_RS13	Tracheophyta	Magnoliopsida	Malpighiales	Euphorbiaceae	Jatropha	Jatropha integerrima	Sunny	Skiophyte	Moist	Park	Shrub (<2m)	5-10cm	191	Flowering	Loamy	Brown	29.5	11.97	47.87	21.5	City Park	Nanmao Lake	24.0095	97.8704	733
T114	KJ_RS11	Tracheophyta	Magnoliopsida	Malpighiales	Euphorbiaceae	Jatropha	Jatropha integerrima	Sunny	Skiophyte	Moist	Park	Shrub (<2m)	5-10cm	151.3	Flowering	Loamy	Brown	29.5	11.97	47.87	21.5	City Park	Nanmao Lake	24.0095	97.8704	733
C095	FE_RS23	Tracheophyta	Magnoliopsida	Malpighiales	Euphorbiaceae	Macaranga	Macaranga adenantha	Sunny	Heliophyte	Moist	Reserve	Tree (<10m)	0-5cm	96.4	Vegetative	Loamy	Brown	30.77	12.4	49.6	22.64	Moli Rainforest	Moli Rainforest	24.1109	97.9857	838
C028	XG_RS06	Tracheophyta	Magnoliopsida	Malpighiales	Euphorbiaceae	Macaranga	Macaranga indica	Sunny	Skiophyte	Moist	Reserve	Tree (<10m)	0-5cm	102.1	Vegetative	Loamy	Brown	34.33	13.5	54	20	Moli Rainforest	Moli Rainforest	24.1057	97.9827	838
C028	XG_RS05	Tracheophyta	Magnoliopsida	Malpighiales	Euphorbiaceae	Macaranga	Macaranga indica	Sunny	Skiophyte	Moist	Reserve	Tree (<10m)	0-5cm	102.7	Vegetative	Loamy	Brown	34.33	13.5	54	20	Moli Rainforest	Moli Rainforest	24.1057	97.9827	838
C028	XG_RS04	Tracheophyta	Magnoliopsida	Malpighiales	Euphorbiaceae	Macaranga	Macaranga indica	Sunny	Skiophyte	Moist	Reserve	Tree (<10m)	0-5cm	40.1	Vegetative	Loamy	Brown	34.33	13.5	54	20	Moli Rainforest	Moli Rainforest	24.1057	97.9827	838
T017	ZI_RS13	Tracheophyta	Magnoliopsida	Malpighiales	Euphorbiaceae	Macaranga	Macaranga tanarius	Sunny	Heliophyte	Moist	Hillside	Tree (<10m)	5-10cm	129.2	Vegetative	Loamy	Brown	40.87	15.57	62.27	22.1	Botanical Garden	Botanical Garden	24.07	97.8183	1082
T017	ZI_RS14	Tracheophyta	Magnoliopsida	Malpighiales	Euphorbiaceae	Macaranga	Macaranga tanarius	Sunny	Heliophyte	Moist	Hillside	Tree (<10m)	5-10cm	95.4	Vegetative	Loamy	Brown	40.87	15.57	62.27	22.1	Botanical Garden	Botanical Garden	24.07	97.8183	1082
T017	ZI_RS15	Tracheophyta	Magnoliopsida	Malpighiales	Euphorbiaceae	Macaranga	Macaranga tanarius	Sunny	Heliophyte	Moist	Hillside	Tree (<10m)	5-10cm	105.8	Vegetative	Loamy	Brown	40.87	15.57	62.27	22.1	Botanical Garden	Botanical Garden	24.07	97.8183	1082
C041	XG_RS22	Tracheophyta	Magnoliopsida	Malpighiales	Euphorbiaceae	Mallotus	Mallotus philippensis	Sunny	Skiophyte	Moist	Reserve	Tree (<10m)	0-5cm	63	Vegetative	Loamy	Brown	36.57	14.23	56.93	20.87	Moli Rainforest	Moli Rainforest	24.1052	97.981	842
T240	CA_RS05	Tracheophyta	Magnoliopsida	Malpighiales	Euphorbiaceae	Manihot	Manihot esculenta	Sunny	Skiophyte	Moist	Hillside	Shrub (<2m)	0-5cm	99.1	Vegetative	Loamy	Red	23.4	10.03	40.13	25.7	Botanical Garden	Botanical Garden	24.0699	97.8192	1110
T091	LS_RS01	Tracheophyta	Magnoliopsida	Malpighiales	Calophyllaceae	Mesua	Mesua ferrea	Sunny	Heliophyte	Moist	Hillside	Tree (<10m)	15-20cm	107.5	Vegetative	Loamy	Brown	35.6	13.93	55.73	25.54	Botanical Garden	Botanical Garden	24.0692	97.82	1111
T091	LS_RS03	Tracheophyta	Magnoliopsida	Malpighiales	Calophyllaceae	Mesua	Mesua ferrea	Sunny	Heliophyte	Moist	Hillside	Tree (<10m)	15-20cm	108.7	Vegetative	Loamy	Brown	35.6	13.93	55.73	25.54	Botanical Garden	Botanical Garden	24.0692	97.82	1111
T091	LS_RS02	Tracheophyta	Magnoliopsida	Malpighiales	Calophyllaceae	Mesua	Mesua ferrea	Sunny	Heliophyte	Moist	Hillside	Tree (<10m)	15-20cm	103.4	Vegetative	Loamy	Brown	35.6	13.93	55.73	25.54	Botanical Garden	Botanical Garden	24.0692	97.82	1111
E083	XD_RS16	Tracheophyta	Magnoliopsida	Malpighiales	Phyllanthaceae	Phyllanthus	Phyllanthus arenarius	Shower	Skiophyte	Moist	Hillside	Herb	0-5cm	104.4	Vegetative	Loamy	Brown					Botanical Garden	Botanical Garden	24.0705	97.8175	1111
A019	XA_RS05	Tracheophyta	Magnoliopsida	Malpighiales	Phyllanthaceae	Phyllanthus	Phyllanthus emblica	Sunny	Heliophyte	Moist	Hillside	Tree (<10m)	5-10cm	196.2	Vegetative	Loamy	Red					Botanical Garden	Botanical Garden	24.0692	97.8198	1107
A019	XA_RS03	Tracheophyta	Magnoliopsida	Malpighiales	Phyllanthaceae	Phyllanthus	Phyllanthus emblica	Sunny	Heliophyte	Moist	Hillside	Tree (<10m)	5-10cm	68	Vegetative	Loamy	Red					Botanical Garden	Botanical Garden	24.0692	97.8198	1107
A019	XA_RS04	Tracheophyta	Magnoliopsida	Malpighiales	Phyllanthaceae	Phyllanthus	Phyllanthus emblica	Sunny	Heliophyte	Moist	Hillside	Tree (<10m)	5-10cm	78.6	Vegetative	Loamy	Red					Botanical Garden	Botanical Garden	24.0692	97.8198	1107
T388	ZC_RS09	Tracheophyta	Magnoliopsida	Malpighiales	Euphorbiaceae	Ricinus	Ricinus communis	Sunny	Heliophyte	Moist	Park	Tree (<10m)	5-10cm	127.5	Fruiting	Loamy	Red	36.4	14.17	56.67	29.62	City Park	Longmo Lake	24.0023	97.8435	730
T388	ZC_RS11	Tracheophyta	Magnoliopsida	Malpighiales	Euphorbiaceae	Ricinus	Ricinus communis	Sunny	Heliophyte	Moist	Park	Tree (<10m)	5-10cm	84.4	Fruiting	Loamy	Red	36.4	14.17	56.67	29.62	City Park	Longmo Lake	24.0023	97.8435	730
T388	ZC_RS10	Tracheophyta	Magnoliopsida	Malpighiales	Euphorbiaceae	Ricinus	Ricinus communis	Sunny	Heliophyte	Moist	Park	Tree (<10m)	5-10cm	124.2	Fruiting	Loamy	Red	36.4	14.17	56.67	29.62	City Park	Longmo Lake	24.0023	97.8435	730
T247	XJ_RS21	Tracheophyta	Magnoliopsida	Malpighiales	Salicaceae	Salix	Salix tetrasperma	Sunny	Heliophyte	Moist	Reserve	Tree (>10m)	0-5cm	86.6	Vegetative	Loamy	Brown					Moli Rainforest	Moli Rainforest	24.1087	97.9873	812
T247	XJ_RS20	Tracheophyta	Magnoliopsida	Malpighiales	Salicaceae	Salix	Salix tetrasperma	Sunny	Heliophyte	Moist	Reserve	Tree (>10m)	0-5cm	84.2	Vegetative	Loamy	Brown					Moli Rainforest	Moli Rainforest	24.1087	97.9873	812
T247	XJ_RS19	Tracheophyta	Magnoliopsida	Malpighiales	Salicaceae	Salix	Salix tetrasperma	Sunny	Heliophyte	Moist	Reserve	Tree (>10m)	0-5cm	58	Vegetative	Loamy	Brown					Moli Rainforest	Moli Rainforest	24.1087	97.9873	812
T407	LD_RS24	Tracheophyta	Magnoliopsida	Malvales	Malvaceae	Abelmoschus	Abelmoschus sagittifolius	Sunny	Heliophyte	Moist	Park	Herb	0-5cm	100.7	Fruiting	Loamy	Red	27.73	11.43	45.73	21.08	City Park	Longmo Lake	24.002	97.8355	730
T270	FI_RS20	Tracheophyta	Magnoliopsida	Malvales	Malvaceae	Bombax	Bombax ceiba	Sunny	Heliophyte	Moist	Reserve	Tree (>10m)	10-15cm	122.8	Vegetative	Loamy	Brown					Moli Rainforest	Moli Rainforest	24.1101	97.9859	834
T270	FI_RS10	Tracheophyta	Magnoliopsida	Malvales	Malvaceae	Bombax	Bombax ceiba	Sunny	Heliophyte	Moist	Reserve	Tree (>10m)	10-15cm	126.5	Vegetative	Loamy	Brown					Moli Rainforest	Moli Rainforest	24.1101	97.9859	834
T364	ZB_RS23	Tracheophyta	Magnoliopsida	Malvales	Malvaceae	Bombax	Bombax ceiba	Sunny	Heliophyte	Moist	Park	Tree (<10m)	5-10cm	90.2	Fruiting	Loamy	Red	21.07	9.3	37.2	20.02	City Park	Longmo Lake	23.999	97.8396	730
T094	KH_RS19	Tracheophyta	Magnoliopsida	Malvales	Malvaceae	Bombax	Bombax insigne	Sunny	Heliophyte	Moist	Hillside	Tree (>10m)	5-10cm	113.8	Vegetative	Loamy	Brown	27.37	11.3	45.2	20.97	Botanical Garden	Botanical Garden	24.0692	97.8206	1112
T094	KH_RS21	Tracheophyta	Magnoliopsida	Malvales	Malvaceae	Bombax	Bombax insigne	Sunny	Heliophyte	Moist	Hillside	Tree (>10m)	5-10cm	98.3	Vegetative	Loamy	Brown	27.37	11.3	45.2	20.97	Botanical Garden	Botanical Garden	24.0692	97.8206	1112
T094	KH_RS20	Tracheophyta	Magnoliopsida	Malvales	Malvaceae	Bombax	Bombax insigne	Sunny	Heliophyte	Moist	Hillside	Tree (>10m)	5-10cm	102.9	Vegetative	Loamy	Brown	27.37	11.3	45.2	20.97	Botanical Garden	Botanical Garden	24.0692	97.8206	1112
F100	LH_RS19	Tracheophyta	Magnoliopsida	Malvales	Malvaceae	Colona	Colona floribunda	Sunny	Skiophyte	Moist	Hillside		5-10cm	107.5	Vegetative	Loamy	Red	30.3	12.23	48.93	24.95	Wanding Town	Wanding Forest Park	24.0872	98.0739	893
F103	LH_RS21	Tracheophyta	Magnoliopsida	Malvales	Malvaceae	Colona	Colona floribunda	Sunny	Skiophyte	Moist	Hillside		5-10cm	102.2	Vegetative	Loamy	Red	34.5	13.53	54.13	23.77	Wanding Town	Wanding Forest Park	24.0878	98.0744	902
A012	XA_RS14	Tracheophyta	Magnoliopsida	Malvales	Dipterocarpaceae	Dipterocarpus	Dipterocarpus retusus	Sunny	Heliophyte	Moist	Hillside	Tree (<10m)	5-10cm	166.6	Flowering	Loamy	Brown	21.9	9.6	38.4	23.12	Botanical Garden	Botanical Garden	24.0694	97.8199	1108
A025	HB_RS07	Tracheophyta	Magnoliopsida	Malvales	Dipterocarpaceae	Dipterocarpus	Dipterocarpus retusus	Sunny	Heliophyte	Moist	Hillside	Tree (>10m)	5-10cm	104.2	Vegetative	Loamy	Brown					Botanical Garden	Botanical Garden	24.0692	97.82	1109
A065	FF_RS05	Tracheophyta	Magnoliopsida	Malvales	Malvaceae	Firmiana	Firmiana colorata	Sunny	Heliophyte	Moist	Hillside	Tree (<10m)	5-10cm	84.3	Vegetative	Loamy	Brown	24	10.23	40.93	21.54	Botanical Garden	Botanical Garden	24.0692	97.8207	1110
T015	ZI_RS07	Tracheophyta	Magnoliopsida	Malvales	Malvaceae	Heritiera	Heritiera angustata	Sunny	Heliophyte	Moist	Hillside	Tree (>10m)	0-5cm	104.2	Vegetative	Loamy	Brown	35.4	13.77	55.47	24.25	Botanical Garden	Botanical Garden	24.0692	97.8208	1110
T015	ZI_RS08	Tracheophyta	Magnoliopsida	Malvales	Malvaceae	Heritiera	Heritiera angustata	Sunny	Heliophyte	Moist	Hillside	Tree (>10m)	0-5cm	72.4	Vegetative	Loamy	Brown	35.4	13.77	55.47	24.25	Botanical Garden	Botanical Garden	24.0692	97.8208	1110
T015	ZI_RS09	Tracheophyta	Magnoliopsida	Malvales	Malvaceae	Heritiera	Heritiera angustata	Sunny	Heliophyte	Moist	Hillside	Tree (>10m)	0-5cm	86.6	Vegetative	Loamy	Brown	35.4	13.77	55.47	24.25	Botanical Garden	Botanical Garden	24.0692	97.8208	1110
B033	HE_RS01	Tracheophyta	Magnoliopsida	Malvales	Malvaceae	Hibiscus	Hibiscus rosa-sinensis	Sunny	Heliophyte	Moist	Hillside	Shrub (<2m)	0-5cm	88.9	Vegetative	Loamy	Brown	25.77	10.77	43.07	20.87	Botanical Garden	Botanical Garden	24.0695	97.8189	1110
T112	KJ_RS18	Tracheophyta	Magnoliopsida	Malvales	Malvaceae	Hibiscus	Hibiscus rosa-sinensis	Sunny	Heliophyte	Moist	Park	Shrub (<2m)	0-5cm	168.5	Vegetative	Loamy	Brown	21.93	9.6	38.4	21.1	City Park	Nanmao Lake	24.0093	97.87	733
T112	KJ_RS19	Tracheophyta	Magnoliopsida	Malvales	Malvaceae	Hibiscus	Hibiscus rosa-sinensis	Sunny	Heliophyte	Moist	Park	Shrub (<2m)	0-5cm	161.2	Vegetative	Loamy	Brown	21.93	9.6	38.4	21.1	City Park	Nanmao Lake	24.0093	97.87	733
T112	KJ_RS17	Tracheophyta	Magnoliopsida	Malvales	Malvaceae	Hibiscus	Hibiscus rosa-sinensis	Sunny	Heliophyte	Moist	Park	Shrub (<2m)	0-5cm	87.6	Vegetative	Loamy	Brown	21.93	9.6	38.4	21.1	City Park	Nanmao Lake	24.0093	97.87	733
T174	LJ_RS13	Tracheophyta	Magnoliopsida	Malvales	Malvaceae	Hibiscus	Hibiscus rosa-sinensis	Sunny	Heliophyte	Moist	Park	Shrub (<2m)	5-10cm	97.6	Flowering	Loamy	Brown	28.87	11.8	47.2	28.39	City Park	Nanmao Lake	24.0111	97.8701	723
T174	LJ_RS15	Tracheophyta	Magnoliopsida	Malvales	Malvaceae	Hibiscus	Hibiscus rosa-sinensis	Sunny	Heliophyte	Moist	Park	Shrub (<2m)	5-10cm	101.3	Flowering	Loamy	Brown	28.87	11.8	47.2	28.39	City Park	Nanmao Lake	24.0111	97.8701	723
T174	LJ_RS14	Tracheophyta	Magnoliopsida	Malvales	Malvaceae	Hibiscus	Hibiscus rosa-sinensis	Sunny	Heliophyte	Moist	Park	Shrub (<2m)	5-10cm	100.8	Flowering	Loamy	Brown	28.87	11.8	47.2	28.39	City Park	Nanmao Lake	24.0111	97.8701	723
T176	LJ_RS07	Tracheophyta	Magnoliopsida	Malvales	Malvaceae	Hibiscus	Hibiscus rosa-sinensis	Sunny	Heliophyte	Moist	Park	Shrub (<2m)	5-10cm	99.7	Vegetative	Loamy	Brown	26.4	11	44	27.2	City Park	Nanmao Lake	24.0094	97.8738	726
T176	LJ_RS08	Tracheophyta	Magnoliopsida	Malvales	Malvaceae	Hibiscus	Hibiscus rosa-sinensis	Sunny	Heliophyte	Moist	Park	Shrub (<2m)	5-10cm	99.8	Vegetative	Loamy	Brown	26.4	11	44	27.2	City Park	Nanmao Lake	24.0094	97.8738	726
T176	LJ_RS09	Tracheophyta	Magnoliopsida	Malvales	Malvaceae	Hibiscus	Hibiscus rosa-sinensis	Sunny	Heliophyte	Moist	Park	Shrub (<2m)	5-10cm	99.4	Vegetative	Loamy	Brown	26.4	11	44	27.2	City Park	Nanmao Lake	24.0094	97.8738	726
T259	CC_RS09	Tracheophyta	Magnoliopsida	Malvales	Malvaceae	Hibiscus	Hibiscus rosa-sinensis	Sunny	Heliophyte	Moist	Reserve	Shrub (>2m)	5-10cm	71.4	Flowering	Loamy	Brown	30.93	12.43	49.73	21.68	Moli Rainforest	Moli Rainforest	24.1098	97.9859	813
T344	LA_RS05	Tracheophyta	Magnoliopsida	Malvales	Malvaceae	Hibiscus	Hibiscus rosa-sinensis	Sunny	Heliophyte	Moist	Park	Shrub (<2m)	5-10cm	44.9	Vegetative	Loamy	Yellow	29.5	11.97	47.87	26.89	City Park	Longmo Lake	24.0022	97.8423	730
T344	LA_RS04	Tracheophyta	Magnoliopsida	Malvales	Malvaceae	Hibiscus	Hibiscus rosa-sinensis	Sunny	Heliophyte	Moist	Park	Shrub (<2m)	5-10cm	60.4	Vegetative	Loamy	Yellow	29.5	11.97	47.87	26.89	City Park	Longmo Lake	24.0022	97.8423	730
T344	LA_RS06	Tracheophyta	Magnoliopsida	Malvales	Malvaceae	Hibiscus	Hibiscus rosa-sinensis	Sunny	Heliophyte	Moist	Park	Shrub (<2m)	5-10cm	50.2	Vegetative	Loamy	Yellow	29.5	11.97	47.87	26.89	City Park	Longmo Lake	24.0022	97.8423	730
T409	ZC_RS22	Tracheophyta	Magnoliopsida	Malvales	Malvaceae	Hibiscus	Hibiscus rosa-sinensis	Sunny	Heliophyte	Moist	Park	Shrub (<2m)	5-10cm	101.1	Vegetative	Loamy	Red	36.43	14.17	56.67	26.35	City Park	Longmo Lake	24.0013	97.8353	730
T409	ZC_RS21	Tracheophyta	Magnoliopsida	Malvales	Malvaceae	Hibiscus	Hibiscus rosa-sinensis	Sunny	Heliophyte	Moist	Park	Shrub (<2m)	5-10cm	115.8	Vegetative	Loamy	Red	36.43	14.17	56.67	26.35	City Park	Longmo Lake	24.0013	97.8353	730
T409	ZC_RS20	Tracheophyta	Magnoliopsida	Malvales	Malvaceae	Hibiscus	Hibiscus rosa-sinensis	Sunny	Heliophyte	Moist	Park	Shrub (<2m)	5-10cm	112.5	Vegetative	Loamy	Red	36.43	14.17	56.67	26.35	City Park	Longmo Lake	24.0013	97.8353	730
B006	ZG_RS07	Tracheophyta	Magnoliopsida	Malvales	Malvaceae	Kydia	Kydia calycina	Sunny	Skiophyte	Dry	Hillside	Tree (<10m)	5-10cm	85.6	Vegetative	Loamy	Brown	25.2	10.65	34.25	14.62	Botanical Garden	Botanical Garden	24.0696	97.8199	1112
T286	CA_RS09	Tracheophyta	Magnoliopsida	Malvales	Malvaceae	Kydia	Kydia calycina	Sunny	Heliophyte	Moist	Reserve	Tree (>10m)	0-5cm	99.8	Vegetative	Loamy	Brown	25.23	10.63	42.53	19.77	Moli Rainforest	Moli Rainforest	24.1129	97.9843	861
T286	CA_RS08	Tracheophyta	Magnoliopsida	Malvales	Malvaceae	Kydia	Kydia calycina	Sunny	Heliophyte	Moist	Reserve	Tree (>10m)	0-5cm	102.2	Vegetative	Loamy	Brown	25.23	10.63	42.53	19.77	Moli Rainforest	Moli Rainforest	24.1129	97.9843	861
T286	CA_RS04	Tracheophyta	Magnoliopsida	Malvales	Malvaceae	Kydia	Kydia calycina	Sunny	Heliophyte	Moist	Reserve	Tree (>10m)	0-5cm	104	Vegetative	Loamy	Brown	25.23	10.63	42.53	19.77	Moli Rainforest	Moli Rainforest	24.1129	97.9843	861
C040	XG_RS19	Tracheophyta	Magnoliopsida	Malvales	Malvaceae	Kydia	Kydia glabrescens	Sunny	Heliophyte	Moist	Reserve	Tree (>10m)	0-5cm	102.8	Vegetative	Loamy	Brown					Moli Rainforest	Moli Rainforest	24.1054	97.9812	842
C040	XG_RS20	Tracheophyta	Magnoliopsida	Malvales	Malvaceae	Kydia	Kydia glabrescens	Sunny	Heliophyte	Moist	Reserve	Tree (>10m)	0-5cm	101.7	Vegetative	Loamy	Brown					Moli Rainforest	Moli Rainforest	24.1054	97.9812	842
C040	XG_RS21	Tracheophyta	Magnoliopsida	Malvales	Malvaceae	Kydia	Kydia glabrescens	Sunny	Heliophyte	Moist	Reserve	Tree (>10m)	0-5cm	100.9	Vegetative	Loamy	Brown					Moli Rainforest	Moli Rainforest	24.1054	97.9812	842
T321	ZA_RS23	Tracheophyta	Magnoliopsida	Malvales	Malvaceae	Malvaviscus	Malvaviscus arboreus	Sunny	Heliophyte	Moist	Park	Shrub (<2m)	10-15cm	80.3	Flowering	Loamy	Brown	25.73	10.77	43.07	17.83	City Park	Longmo Lake	24.0028	97.8431	730
T321	ZA_RS24	Tracheophyta	Magnoliopsida	Malvales	Malvaceae	Malvaviscus	Malvaviscus arboreus	Sunny	Heliophyte	Moist	Park	Shrub (<2m)	10-15cm	50.4	Flowering	Loamy	Brown	25.73	10.77	43.07	17.83	City Park	Longmo Lake	24.0028	97.8431	730
T321	LC_RS01	Tracheophyta	Magnoliopsida	Malvales	Malvaceae	Malvaviscus	Malvaviscus arboreus	Sunny	Heliophyte	Moist	Park	Shrub (<2m)	10-15cm	106.8	Flowering	Loamy	Brown	25.73	10.77	43.07	17.83	City Park	Longmo Lake	24.0028	97.8431	730
T235	CC_RS03	Tracheophyta	Magnoliopsida	Malvales	Muntingiaceae	Muntingia	Muntingia calabura	Sunny	Heliophyte	Moist	Park	Tree (<10m)	0-5cm	91.7	Vegetative	Loamy	Brown	29.33	11.97	47.97	27.87	City Park	Nanmao Lake	24.0121	97.8699	730
T235	CC_RS05	Tracheophyta	Magnoliopsida	Malvales	Muntingiaceae	Muntingia	Muntingia calabura	Sunny	Heliophyte	Moist	Park	Tree (<10m)	0-5cm	107.4	Vegetative	Loamy	Brown	29.33	11.97	47.97	27.87	City Park	Nanmao Lake	24.0121	97.8699	730
T235	CC_RS04	Tracheophyta	Magnoliopsida	Malvales	Muntingiaceae	Muntingia	Muntingia calabura	Sunny	Heliophyte	Moist	Park	Tree (<10m)	0-5cm	70.2	Vegetative	Loamy	Brown	29.33	11.97	47.97	27.87	City Park	Nanmao Lake	24.0121	97.8699	730
T330	LC_RS17	Tracheophyta	Magnoliopsida	Malvales	Muntingiaceae	Muntingia	Muntingia calabura	Sunny	Heliophyte	Moist	Park	Tree (<10m)	5-10cm	104.4	Fruiting	Loamy	Brown	22.43	9.7	38.8	18.83	City Park	Longmo Lake	24.0024	97.8429	730
T330	LC_RS15	Tracheophyta	Magnoliopsida	Malvales	Muntingiaceae	Muntingia	Muntingia calabura	Sunny	Heliophyte	Moist	Park	Tree (<10m)	5-10cm	100.2	Fruiting	Loamy	Brown	22.43	9.7	38.8	18.83	City Park	Longmo Lake	24.0024	97.8429	730
T330	LC_RS16	Tracheophyta	Magnoliopsida	Malvales	Muntingiaceae	Muntingia	Muntingia calabura	Sunny	Heliophyte	Moist	Park	Tree (<10m)	5-10cm	100	Fruiting	Loamy	Brown	22.43	9.7	38.8	18.83	City Park	Longmo Lake	24.0024	97.8429	730
T318	CB_RS04	Tracheophyta	Magnoliopsida	Malvales	Malvaceae	Pachira	Pachira aquatica	Sunny	Heliophyte	Moist	Reserve	Tree (<10m)	0-5cm	93.5	Vegetative	Loamy	Brown	29.37	11.93	47.73	24.02	Moli Rainforest	Moli Rainforest	24.1111	97.9862	824
T382	LE_RS11	Tracheophyta	Magnoliopsida	Malvales	Malvaceae	Pachira	Pachira aquatica	Sunny	Heliophyte	Moist	Park	Tree (<10m)	5-10cm	105.6	Vegetative	Loamy	Red	24	10.23	40.93	30.56	City Park	Longmo Lake	24.0021	97.843	730
T382	LE_RS10	Tracheophyta	Magnoliopsida	Malvales	Malvaceae	Pachira	Pachira aquatica	Sunny	Heliophyte	Moist	Park	Tree (<10m)	5-10cm	100.5	Vegetative	Loamy	Red	24	10.23	40.93	30.56	City Park	Longmo Lake	24.0021	97.843	730
T382	LE_RS12	Tracheophyta	Magnoliopsida	Malvales	Malvaceae	Pachira	Pachira aquatica	Sunny	Heliophyte	Moist	Park	Tree (<10m)	5-10cm	100.3	Vegetative	Loamy	Red	24	10.23	40.93	30.56	City Park	Longmo Lake	24.0021	97.843	730
B119	HC_RS15	Tracheophyta	Magnoliopsida	Malvales	Malvaceae	Pterospermum	Pterospermum acerifolium	Sunny	Heliophyte	Moist	Hillside	Tree (>10m)	0-5cm	97.6	Vegetative	Loamy	Brown					Botanical Garden	Botanical Garden	24.0688	97.8187	1117
B119	HC_RS20	Tracheophyta	Magnoliopsida	Malvales	Malvaceae	Pterospermum	Pterospermum acerifolium	Sunny	Heliophyte	Moist	Hillside	Tree (>10m)	0-5cm	100.1	Vegetative	Loamy	Brown					Botanical Garden	Botanical Garden	24.0688	97.8187	1117
B119	HC_RS16	Tracheophyta	Magnoliopsida	Malvales	Malvaceae	Pterospermum	Pterospermum acerifolium	Sunny	Heliophyte	Moist	Hillside	Tree (>10m)	0-5cm	100.2	Vegetative	Loamy	Brown					Botanical Garden	Botanical Garden	24.0688	97.8187	1117
T305	ZH_RS14	Tracheophyta	Magnoliopsida	Malvales	Malvaceae	Pterospermum	Pterospermum kingtungense	Sunny	Heliophyte	Moist	Reserve	Tree (>10m)	0-5cm	120.3	Vegetative	Loamy	Brown	26.73	11.1	44.4	18.89	Moli Rainforest	Moli Rainforest	24.116	97.9795	947
T018	LV_RS06	Tracheophyta	Magnoliopsida	Malvales	Malvaceae	Pterospermum	Pterospermum menglunense	Sunny	Skiophyte	Moist	Hillside	Tree (<10m)	10-15cm	103.7	Vegetative	Loamy	Brown	27.4	11.5	46	22.64	Botanical Garden	Botanical Garden	24.0698	97.8179	1082
T291	ZH_RS03	Tracheophyta	Magnoliopsida	Malvales	Malvaceae	Pterospermum	Pterospermum menglunense	Sunny	Skiophyte	Moist	Reserve	Tree (>10m)	0-5cm	27.2	Vegetative	Loamy	Brown	39.94	15.33	61.33	16.2	Moli Rainforest	Moli Rainforest	24.1133	97.9833	886
T291	ZH_RS04	Tracheophyta	Magnoliopsida	Malvales	Malvaceae	Pterospermum	Pterospermum menglunense	Sunny	Skiophyte	Moist	Reserve	Tree (>10m)	0-5cm	26.6	Vegetative	Loamy	Brown	39.94	15.33	61.33	16.2	Moli Rainforest	Moli Rainforest	24.1133	97.9833	886
T291	ZH_RS02	Tracheophyta	Magnoliopsida	Malvales	Malvaceae	Pterospermum	Pterospermum menglunense	Sunny	Skiophyte	Moist	Reserve	Tree (>10m)	0-5cm	6.7	Vegetative	Loamy	Brown	39.94	15.33	61.33	16.2	Moli Rainforest	Moli Rainforest	24.1133	97.9833	886
T009	XB_RS21	Tracheophyta	Magnoliopsida	Malvales	Malvaceae	Pterospermum	Pterospermum yunnanense	Sunny	Heliophyte	Dry	Hillside	Tree (>10m)	5-10cm	106.3	Vegetative	Loamy	Brown	38.2	14.73	58.93	24.35	Botanical Garden	Botanical Garden	24.0692	97.8204	1110
T009	XB_RS20	Tracheophyta	Magnoliopsida	Malvales	Malvaceae	Pterospermum	Pterospermum yunnanense	Sunny	Heliophyte	Dry	Hillside	Tree (>10m)	5-10cm	116.7	Vegetative	Loamy	Brown	38.2	14.73	58.93	24.35	Botanical Garden	Botanical Garden	24.0692	97.8204	1110
T022	ZI_RS22	Tracheophyta	Magnoliopsida	Malvales	Dipterocarpaceae	Shorea	Shorea assamica	Sunny	Skiophyte	Moist	Hillside	Tree (<10m)	5-10cm	113.7	Flowering	Loamy	Brown	33.04	13.1	52.67	21.62	Botanical Garden	Botanical Garden	24.0698	97.8174	1118
T022	ZI_RS23	Tracheophyta	Magnoliopsida	Malvales	Dipterocarpaceae	Shorea	Shorea assamica	Sunny	Skiophyte	Moist	Hillside	Tree (<10m)	5-10cm	106.1	Flowering	Loamy	Brown	33.04	13.1	52.67	21.62	Botanical Garden	Botanical Garden	24.0698	97.8174	1118
T022	ZI_RS24	Tracheophyta	Magnoliopsida	Malvales	Dipterocarpaceae	Shorea	Shorea assamica	Sunny	Skiophyte	Moist	Hillside	Tree (<10m)	5-10cm	94.7	Flowering	Loamy	Brown	33.04	13.1	52.67	21.62	Botanical Garden	Botanical Garden	24.0698	97.8174	1118
T145	LV_RS21	Tracheophyta	Magnoliopsida	Malvales	Dipterocarpaceae	Shorea	Shorea assamica	Sunny	Heliophyte	Dry	Park	Tree (<10m)	0-5cm	107.9	Vegetative	Loamy	Brown	22.9	9.87	42.8	23.15	City Park	Nanmao Lake	24.0108	97.8711	720
T199	KF_RS24	Tracheophyta	Magnoliopsida	Malvales	Dipterocarpaceae	Shorea	Shorea wangtianshuea	Shower	Heliophyte	Moist	Park	Tree (<10m)	10-15cm	101	Vegetative	Loamy	Brown	14.1	7.1	28.4	25.25	City Park	Nanmao Lake	24.0116	97.8722	727
A046	KI_RS20	Tracheophyta	Magnoliopsida	Malvales	Malvaceae	Sterculia	Sterculia kingtungensis	Sunny	Heliophyte	Moist	Hillside	Tree (<10m)	5-10cm	102.9	Vegetative	Loamy	Brown	23.47	10.1	40.4	21.75	Botanical Garden	Botanical Garden	24.0712	97.818	1133
B074	XF_RS05	Tracheophyta	Magnoliopsida	Malvales	Malvaceae	Sterculia	Sterculia lanceifolia	Sunny	Skiophyte	Moist	Hillside	Shrub (<2m)	0-5cm	99.1	Vegetative	Loamy	Brown	33.83	13.27	53.63	21.79	Botanical Garden	Botanical Garden	24.0716	97.8165	1120
C071	XH_RS09	Tracheophyta	Magnoliopsida	Malvales	Malvaceae	Sterculia	Sterculia lanceifolia	Sunny	Skiophyte	Moist	Reserve	Shrub (<2m)	0-5cm	50.7	Vegetative	Loamy	Brown	32	12.8	51.2	18.31	Moli Rainforest	Moli Rainforest	24.1154	97.9816	906
F091	LH_RS07	Tracheophyta	Magnoliopsida	Malvales	Malvaceae	Urena	Urena lobata	Sunny	Heliophyte	Dry	Hillside	Herb	0-5cm	74.6	Fruiting	Sandy	Red	19.8	8.9	35.6	27.33	Wanding Town	Wanding Forest Park	24.0906	98.0589	1046
F091	LH_RS08	Tracheophyta	Magnoliopsida	Malvales	Malvaceae	Urena	Urena lobata	Sunny	Heliophyte	Dry	Hillside	Herb	0-5cm	55.9	Fruiting	Sandy	Red	19.8	8.9	35.6	27.33	Wanding Town	Wanding Forest Park	24.0906	98.0589	1046
F091	LH_RS09	Tracheophyta	Magnoliopsida	Malvales	Malvaceae	Urena	Urena lobata	Sunny	Heliophyte	Dry	Hillside	Herb	0-5cm	85.7	Fruiting	Sandy	Red	19.8	8.9	35.6	27.33	Wanding Town	Wanding Forest Park	24.0906	98.0589	1046
T238	CC_RS01	Tracheophyta	Magnoliopsida	Malvales	Malvaceae	Urena	Urena lobata	Sunny	Heliophyte	Dry	Hillside	Herb	0-5cm	45.3	Vegetative	Loamy	Red	20.93	9.27	37.07	27.62	Botanical Garden	Botanical Garden	24.0699	97.8192	1110
T238	CC_RS02	Tracheophyta	Magnoliopsida	Malvales	Malvaceae	Urena	Urena lobata	Sunny	Heliophyte	Dry	Hillside	Herb	0-5cm	18.9	Vegetative	Loamy	Red	20.93	9.27	37.07	27.62	Botanical Garden	Botanical Garden	24.0699	97.8192	1110
T238	FJ_RS04	Tracheophyta	Magnoliopsida	Malvales	Malvaceae	Urena	Urena lobata	Sunny	Heliophyte	Dry	Hillside	Herb	0-5cm	71.7	Vegetative	Loamy	Red	20.93	9.27	37.07	27.62	Botanical Garden	Botanical Garden	24.0699	97.8192	1110
T400	LD_RS14	Tracheophyta	Magnoliopsida	Malvales	Malvaceae	Urena	Urena lobata	Sunny	Heliophyte	Moist	Park	Herb	0-5cm	103.2	Vegetative	Sandy	Yellow	32.27	12.83	51.33	17.93	City Park	Longmo Lake	24.0012	97.8346	730
B053	KD_RS23	Tracheophyta	Polypodiopsida	Marattiales	Marattiaceae	Angiopteris	Angiopteris yunnanensis	Sunny	Skiophyte	Moist	Hillside	Herb	0-5cm	102.8	Vegetative	Loamy	Brown	33.07	13.13	52.53	16.29	Botanical Garden	Botanical Garden	24.0708	97.8174	1112
B053	KD_RS06	Tracheophyta	Polypodiopsida	Marattiales	Marattiaceae	Angiopteris	Angiopteris yunnanensis	Sunny	Skiophyte	Moist	Hillside	Herb	0-5cm	94.9	Vegetative	Loamy	Brown	33.07	13.13	52.53	16.29	Botanical Garden	Botanical Garden	24.0708	97.8174	1112
B053	HE_RS21	Tracheophyta	Polypodiopsida	Marattiales	Marattiaceae	Angiopteris	Angiopteris yunnanensis	Sunny	Skiophyte	Moist	Hillside	Herb	0-5cm	91.7	Vegetative	Loamy	Brown	33.07	13.13	52.53	16.29	Botanical Garden	Botanical Garden	24.0708	97.8174	1112
A004	HA_RS23	Tracheophyta	Magnoliopsida	Myrtales	Combretaceae	Anogeissus	Anogeissus acuminata	Sunny	Heliophyte	Moist	Hillside	Tree (<10m)	5-10cm	35.5	Vegetative	Loamy	Brown	29.1	11.87	47.47	21.14	Botanical Garden	Botanical Garden	24.0693	97.8205	1114
A004	LP_RS24	Tracheophyta	Magnoliopsida	Myrtales	Combretaceae	Anogeissus	Anogeissus acuminata	Sunny	Heliophyte	Moist	Hillside	Tree (<10m)	5-10cm	53.2	Vegetative	Loamy	Brown	29.1	11.87	47.47	21.14	Botanical Garden	Botanical Garden	24.0693	97.8205	1114
A004	LV_RS02	Tracheophyta	Magnoliopsida	Myrtales	Combretaceae	Anogeissus	Anogeissus acuminata	Sunny	Heliophyte	Moist	Hillside	Tree (<10m)	5-10cm	106.1	Vegetative	Loamy	Brown	29.1	11.87	47.47	21.14	Botanical Garden	Botanical Garden	24.0693	97.8205	1114
T143	KH_RS08	Tracheophyta	Magnoliopsida	Myrtales	Myrtaceae	Callistemon	Callistemon viminalis	Sunny	Heliophyte	Dry	Park	Tree (>10m)	5-10cm	103.6	Fruiting	Loamy	Brown					City Park	Nanmao Lake	24.0108	97.8711	720
T164	KI_RS18	Tracheophyta	Magnoliopsida	Myrtales	Myrtaceae	Corymbia	Corymbia citriodora	Sunny	Heliophyte	Dry	Park	Tree (<10m)	5-10cm	100.9	Vegetative	Loamy	Brown					City Park	Nanmao Lake	24.012	97.8703	735
T164	KI_RS17	Tracheophyta	Magnoliopsida	Myrtales	Myrtaceae	Corymbia	Corymbia citriodora	Sunny	Heliophyte	Dry	Park	Tree (<10m)	5-10cm	48.9	Vegetative	Loamy	Brown					City Park	Nanmao Lake	24.012	97.8703	735
T164	KI_RS19	Tracheophyta	Magnoliopsida	Myrtales	Myrtaceae	Corymbia	Corymbia citriodora	Sunny	Heliophyte	Dry	Park	Tree (<10m)	5-10cm	113.8	Vegetative	Loamy	Brown					City Park	Nanmao Lake	24.012	97.8703	735
T102	ZE_RS15	Tracheophyta	Magnoliopsida	Myrtales	Lythraceae	Cuphea	Cuphea hyssopifolia	Sunny	Heliophyte	Moist	Park	Shrub (<2m)	5-10cm	81.3	Flowering	Loamy	Brown					City Park	Nanmao Lake	24.0094	97.8703	719
T262	CC_RS15	Tracheophyta	Magnoliopsida	Myrtales	Lythraceae	Cuphea	Cuphea hyssopifolia	Sunny	Skiophyte	Moist	Reserve	Shrub (<2m)	0-5cm	105.2	Flowering	Loamy	Brown					Moli Rainforest	Moli Rainforest	24.1109	97.985	827
T262	CC_RS13	Tracheophyta	Magnoliopsida	Myrtales	Lythraceae	Cuphea	Cuphea hyssopifolia	Sunny	Skiophyte	Moist	Reserve	Shrub (<2m)	0-5cm	98.2	Flowering	Loamy	Brown					Moli Rainforest	Moli Rainforest	24.1109	97.985	827
T262	CC_RS14	Tracheophyta	Magnoliopsida	Myrtales	Lythraceae	Cuphea	Cuphea hyssopifolia	Sunny	Skiophyte	Moist	Reserve	Shrub (<2m)	0-5cm	99.3	Flowering	Loamy	Brown					Moli Rainforest	Moli Rainforest	24.1109	97.985	827
T350	LD_RS03	Tracheophyta	Magnoliopsida	Myrtales	Lythraceae	Cuphea	Cuphea hyssopifolia	Sunny	Heliophyte	Moist	Park	Shrub (<2m)	5-10cm	98.4	Flowering	Loamy	Brown					City Park	Longmo Lake	24.0024	97.8422	730
T116	KJ_RS06	Tracheophyta	Magnoliopsida	Myrtales	Lythraceae	Duabanga	Duabanga grandiflora	Sunny	Heliophyte	Moist	Park	Tree (<10m)	5-10cm	135.1	Fruiting	Loamy	Brown	32.87	13.03	52	23.33	City Park	Nanmao Lake	24.0094	97.8701	733
T116	KJ_RS04	Tracheophyta	Magnoliopsida	Myrtales	Lythraceae	Duabanga	Duabanga grandiflora	Sunny	Heliophyte	Moist	Park	Tree (<10m)	5-10cm	279	Fruiting	Loamy	Brown	32.87	13.03	52	23.33	City Park	Nanmao Lake	24.0094	97.8701	733
T116	KJ_RS05	Tracheophyta	Magnoliopsida	Myrtales	Lythraceae	Duabanga	Duabanga grandiflora	Sunny	Heliophyte	Moist	Park	Tree (<10m)	5-10cm	136	Fruiting	Loamy	Brown	32.87	13.03	52	23.33	City Park	Nanmao Lake	24.0094	97.8701	733
T383	LE_RS13	Tracheophyta	Magnoliopsida	Myrtales	Lythraceae	Duabanga	Duabanga grandiflora	Sunny	Heliophyte	Moist	Park	Tree (<10m)	0-5cm	102.5	Fruiting	Loamy	Red	32.17	12.83	51.33	29.27	City Park	Longmo Lake	24.0028	97.8436	730
A068	FF_RS08	Tracheophyta	Magnoliopsida	Myrtales	Combretaceae	Getonia	Getonia floribunda	Sunny	Heliophyte	Moist	Hillside	Vine	5-10cm	107.1	Vegetative	Loamy	Brown	21.93	9.57	38.27	21.23	Botanical Garden	Botanical Garden	24.0692	97.8207	1110
A018	XA_RS07	Tracheophyta	Magnoliopsida	Myrtales	Lythraceae	Lagerstroemia	Lagerstroemia indica	Sunny	Heliophyte	Moist	Hillside	Tree (<10m)	0-5cm	70.7	Vegetative	Loamy	Red	22.83	9.87	39.47	25.75	Botanical Garden	Botanical Garden	24.0692	97.82	1113
A018	XA_RS06	Tracheophyta	Magnoliopsida	Myrtales	Lythraceae	Lagerstroemia	Lagerstroemia indica	Sunny	Heliophyte	Moist	Hillside	Tree (<10m)	0-5cm	88.3	Vegetative	Loamy	Red	22.83	9.87	39.47	25.75	Botanical Garden	Botanical Garden	24.0692	97.82	1113
A018	XA_RS08	Tracheophyta	Magnoliopsida	Myrtales	Lythraceae	Lagerstroemia	Lagerstroemia indica	Sunny	Heliophyte	Moist	Hillside	Tree (<10m)	0-5cm	77.4	Vegetative	Loamy	Red	22.83	9.87	39.47	25.75	Botanical Garden	Botanical Garden	24.0692	97.82	1113
T187	KF_RS02	Tracheophyta	Magnoliopsida	Myrtales	Lythraceae	Lagerstroemia	Lagerstroemia indica	Sunny	Skiophyte	Dry	Park	Tree (<10m)	10-15cm	169.5	Vegetative	Loamy	Brown	33.03	13.1	52.4	23.12	City Park	Nanmao Lake	24.0092	97.8688	726
A039	FF_RS03	Tracheophyta	Magnoliopsida	Myrtales	Lythraceae	Lagerstroemia	Lagerstroemia parviflora	Sunny	Skiophyte	Moist	Hillside	Tree (<10m)	5-10cm	54.7	Vegetative	Loamy	Brown	33.7	13.33	53.33	23.89	Botanical Garden	Botanical Garden	24.0696	97.8191	1116
A039	FF_RS21	Tracheophyta	Magnoliopsida	Myrtales	Lythraceae	Lagerstroemia	Lagerstroemia parviflora	Sunny	Skiophyte	Moist	Hillside	Tree (<10m)	5-10cm	86.1	Vegetative	Loamy	Brown	33.7	13.33	53.33	23.89	Botanical Garden	Botanical Garden	24.0696	97.8191	1116
A039	FF_RS17	Tracheophyta	Magnoliopsida	Myrtales	Lythraceae	Lagerstroemia	Lagerstroemia parviflora	Sunny	Skiophyte	Moist	Hillside	Tree (<10m)	5-10cm	34.3	Vegetative	Loamy	Brown	33.7	13.33	53.33	23.89	Botanical Garden	Botanical Garden	24.0696	97.8191	1116
T394	ZD_RS20	Tracheophyta	Magnoliopsida	Myrtales	Lythraceae	Lagerstroemia	Lagerstroemia speciosa	Sunny	Heliophyte	Moist	Park	Tree (<10m)	15-20cm	112.7	Fruiting	Loamy	Red	38.37	14.8	59.2	26.5	City Park	Longmo Lake	23.9985	97.8388	730
T394	ZD_RS21	Tracheophyta	Magnoliopsida	Myrtales	Lythraceae	Lagerstroemia	Lagerstroemia speciosa	Sunny	Heliophyte	Moist	Park	Tree (<10m)	15-20cm	100.9	Fruiting	Loamy	Red	38.37	14.8	59.2	26.5	City Park	Longmo Lake	23.9985	97.8388	730
T394	ZD_RS19	Tracheophyta	Magnoliopsida	Myrtales	Lythraceae	Lagerstroemia	Lagerstroemia speciosa	Sunny	Heliophyte	Moist	Park	Tree (<10m)	15-20cm	111.5	Fruiting	Loamy	Red	38.37	14.8	59.2	26.5	City Park	Longmo Lake	23.9985	97.8388	730
T224	KE_RS16	Tracheophyta	Magnoliopsida	Myrtales	Myrtaceae	Melaleuca	Melaleuca alternifolia	Sunny	Heliophyte	Moist	Park	Tree (<10m)	0-5cm	135	Vegetative	Loamy	Brown					City Park	Nanmao Lake	24.0116	97.8722	730
T224	KE_RS19	Tracheophyta	Magnoliopsida	Myrtales	Myrtaceae	Melaleuca	Melaleuca alternifolia	Sunny	Heliophyte	Moist	Park	Tree (<10m)	0-5cm	180.4	Vegetative	Loamy	Brown					City Park	Nanmao Lake	24.0116	97.8722	730
T224	KE_RS18	Tracheophyta	Magnoliopsida	Myrtales	Myrtaceae	Melaleuca	Melaleuca alternifolia	Sunny	Heliophyte	Moist	Park	Tree (<10m)	0-5cm	199.5	Vegetative	Loamy	Brown					City Park	Nanmao Lake	24.0116	97.8722	730
T374	ZE_RS18	Tracheophyta	Magnoliopsida	Myrtales	Myrtaceae	Melaleuca	Melaleuca cajuputi	Sunny	Heliophyte	Moist	Park	Tree (>10m)	5-10cm	105.8	Fruiting	Loamy	Red	31.07	12.5	50	27	City Park	Longmo Lake	24.0038	97.8434	730
B043	HE_RS16	Tracheophyta	Magnoliopsida	Myrtales	Melastomataceae	Melastoma	Melastoma malabathricum	Sunny	Heliophyte	Moist	Hillside	Shrub (<2m)	0-5cm	42.8	Flowering	Loamy	Brown	32.77	12.97	52.13	17.58	Botanical Garden	Botanical Garden	24.0693	97.8183	1119
E084	XD_RS17	Tracheophyta	Magnoliopsida	Myrtales	Melastomataceae	Pseudodissochaeta	Pseudodissochaeta septentrionalis	Shower	Skiophyte	Moist	Hillside	Shrub (>2m)	5-10cm	98.6	Fruiting	Loamy	Brown	29.13	11.87	47.47	16.62	Botanical Garden	Botanical Garden	24.0705	97.8174	1111
T160	KI_RS07	Tracheophyta	Magnoliopsida	Myrtales	Myrtaceae	Psidium	Psidium guajava	Sunny	Heliophyte	Dry	Park	Tree (<10m)	0-5cm	101.8	Vegetative	Loamy	Brown	27.83	11.43	45.73	27.93	City Park	Nanmao Lake	24.0112	97.8704	721
T160	KI_RS06	Tracheophyta	Magnoliopsida	Myrtales	Myrtaceae	Psidium	Psidium guajava	Sunny	Heliophyte	Dry	Park	Tree (<10m)	0-5cm	21.1	Vegetative	Loamy	Brown	27.83	11.43	45.73	27.93	City Park	Nanmao Lake	24.0112	97.8704	721
T160	KI_RS05	Tracheophyta	Magnoliopsida	Myrtales	Myrtaceae	Psidium	Psidium guajava	Sunny	Heliophyte	Dry	Park	Tree (<10m)	0-5cm	53.5	Vegetative	Loamy	Brown	27.83	11.43	45.73	27.93	City Park	Nanmao Lake	24.0112	97.8704	721
T106	LK_RS10	Tracheophyta	Magnoliopsida	Myrtales	Lythraceae	Punica	Punica granatum	Sunny	Heliophyte	Moist	Park	Tree (<10m)	5-10cm	98.9	Vegetative	Loamy	Brown	28.5	11.7	46.8	18.12	City Park	Nanmao Lake	24.0095	97.8706	733
T106	LK_RS09	Tracheophyta	Magnoliopsida	Myrtales	Lythraceae	Punica	Punica granatum	Sunny	Heliophyte	Moist	Park	Tree (<10m)	5-10cm	104.8	Vegetative	Loamy	Brown	28.5	11.7	46.8	18.12	City Park	Nanmao Lake	24.0095	97.8706	733
B122	HD_RS19	Tracheophyta	Magnoliopsida	Myrtales	Myrtaceae	Syzygium	Syzygium forrestii	Sunny	Skiophyte	Moist	Hillside	Tree (<10m)	0-5cm	118.9	Vegetative	Loamy	Brown	34.73	13.63	54.53	17.02	Botanical Garden	Botanical Garden	24.0686	97.8188	1068
T225	KE_RS13	Tracheophyta	Magnoliopsida	Myrtales	Myrtaceae	Syzygium	Syzygium hancei	Sunny	Heliophyte	Moist	Park	Tree (<10m)	5-10cm	140.7	Vegetative	Loamy	Brown	39.37	15.1	60.4	28.31	City Park	Nanmao Lake	24.0116	97.8721	730
T225	KE_RS12	Tracheophyta	Magnoliopsida	Myrtales	Myrtaceae	Syzygium	Syzygium hancei	Sunny	Heliophyte	Moist	Park	Tree (<10m)	5-10cm	86.7	Vegetative	Loamy	Brown	39.37	15.1	60.4	28.31	City Park	Nanmao Lake	24.0116	97.8721	730
T225	KE_RS17	Tracheophyta	Magnoliopsida	Myrtales	Myrtaceae	Syzygium	Syzygium hancei	Sunny	Heliophyte	Moist	Park	Tree (<10m)	5-10cm	169.6	Vegetative	Loamy	Brown	39.37	15.1	60.4	28.31	City Park	Nanmao Lake	24.0116	97.8721	730
T135	FG_RS05	Tracheophyta	Magnoliopsida	Myrtales	Myrtaceae	Syzygium	Syzygium jambos	Sunny	Heliophyte	Moist	Park	Tree (<10m)	0-5cm	98.4	Vegetative	Loamy	Brown	28.77	11.77	47.07	20.79	City Park	Nanmao Lake	24.0107	97.8714	724
T329	LC_RS14	Tracheophyta	Magnoliopsida	Myrtales	Myrtaceae	Syzygium	Syzygium jambos	Sunny	Heliophyte	Moist	Park	Tree (<10m)	5-10cm	90.6	Flowering	Loamy	Brown	31.87	12.7	50.8	18.29	City Park	Longmo Lake	24.0026	97.8433	730
T161	KI_RS11	Tracheophyta	Magnoliopsida	Myrtales	Myrtaceae	Syzygium	Syzygium samarangense	Sunny	Heliophyte	Moist	Park	Tree (<10m)	0-5cm	114.6	Fruiting	Loamy	Brown	35.43	13.83	55.33	26.43	City Park	Nanmao Lake	24.0112	97.8704	722
T161	KI_RS12	Tracheophyta	Magnoliopsida	Myrtales	Myrtaceae	Syzygium	Syzygium samarangense	Sunny	Heliophyte	Moist	Park	Tree (<10m)	0-5cm	107	Fruiting	Loamy	Brown	35.43	13.83	55.33	26.43	City Park	Nanmao Lake	24.0112	97.8704	722
T161	KI_RS10	Tracheophyta	Magnoliopsida	Myrtales	Myrtaceae	Syzygium	Syzygium samarangense	Sunny	Heliophyte	Moist	Park	Tree (<10m)	0-5cm	103.6	Fruiting	Loamy	Brown	35.43	13.83	55.33	26.43	City Park	Nanmao Lake	24.0112	97.8704	722
B068	HD_RS12	Tracheophyta	Magnoliopsida	Myrtales	Myrtaceae	Syzygium	Syzygium tetragonum	Sunny	Skiophyte	Moist	Hillside	Tree (<10m)	0-5cm	108.9	Vegetative	Loamy	Brown	31.73	12.7	50.8	17.98	Botanical Garden	Botanical Garden	24.0718	97.8164	1137
B068	HD_RS13	Tracheophyta	Magnoliopsida	Myrtales	Myrtaceae	Syzygium	Syzygium tetragonum	Sunny	Skiophyte	Moist	Hillside	Tree (<10m)	0-5cm	112.7	Vegetative	Loamy	Brown	31.73	12.7	50.8	17.98	Botanical Garden	Botanical Garden	24.0718	97.8164	1137
B068	HD_RS11	Tracheophyta	Magnoliopsida	Myrtales	Myrtaceae	Syzygium	Syzygium tetragonum	Sunny	Skiophyte	Moist	Hillside	Tree (<10m)	0-5cm	112.3	Vegetative	Loamy	Brown	31.73	12.7	50.8	17.98	Botanical Garden	Botanical Garden	24.0718	97.8164	1137
A040	FF_RS13	Tracheophyta	Magnoliopsida	Myrtales	Combretaceae	Terminalia	Terminalia bellirica	Sunny	Heliophyte	Moist	Hillside	Tree (<10m)	5-10cm	106.8	Vegetative	Loamy	Brown	33.93	13.37	53.47	22.79	Botanical Garden	Botanical Garden	24.0693	97.8208	1111
F090	LH_RS05	Tracheophyta	Magnoliopsida	Myrtales	Combretaceae	Terminalia	Terminalia chebula	Sunny	Heliophyte	Dry	Hillside	Tree (<10m)	10-15cm	95.2	Flowering	Sandy	Red	26.67	11.1	44.4	24.06	Wanding Town	Wanding Forest Park	24.0906	98.0589	1046
F090	LH_RS06	Tracheophyta	Magnoliopsida	Myrtales	Combretaceae	Terminalia	Terminalia chebula	Sunny	Heliophyte	Dry	Hillside	Tree (<10m)	10-15cm	98.8	Flowering	Sandy	Red	26.67	11.1	44.4	24.06	Wanding Town	Wanding Forest Park	24.0906	98.0589	1046
F090	ZE_RS02	Tracheophyta	Magnoliopsida	Myrtales	Combretaceae	Terminalia	Terminalia chebula	Sunny	Heliophyte	Dry	Hillside	Tree (<10m)	10-15cm	67.4	Flowering	Sandy	Red	26.67	11.1	44.4	24.06	Wanding Town	Wanding Forest Park	24.0906	98.0589	1046
T351	LD_RS04	Tracheophyta	Magnoliopsida	Myrtales	Combretaceae	Terminalia	Terminalia myriocarpa	Sunny	Heliophyte	Moist	Park	Tree (<10m)	5-10cm	64.7	Fruiting	Loamy	Red	31.13	12.47	49.87	26.39	City Park	Longmo Lake	24.0025	97.8415	730
T351	LD_RS06	Tracheophyta	Magnoliopsida	Myrtales	Combretaceae	Terminalia	Terminalia myriocarpa	Sunny	Heliophyte	Moist	Park	Tree (<10m)	5-10cm	45.4	Fruiting	Loamy	Red	31.13	12.47	49.87	26.39	City Park	Longmo Lake	24.0025	97.8415	730
T351	LD_RS05	Tracheophyta	Magnoliopsida	Myrtales	Combretaceae	Terminalia	Terminalia myriocarpa	Sunny	Heliophyte	Moist	Park	Tree (<10m)	5-10cm	92.9	Fruiting	Loamy	Red	31.13	12.47	49.87	26.39	City Park	Longmo Lake	24.0025	97.8415	730
A016	XA_RS12	Tracheophyta	Magnoliopsida	Myrtales	Combretaceae	Terminalia	Terminalia neotaliala	Sunny	Heliophyte	Moist	Hillside	Tree (>10m)	5-10cm	187.1	Vegetative	Loamy	Brown	32.6	12.93	51.73	24.85	Botanical Garden	Botanical Garden	24.0693	97.82	1107
T357	ZB_RS13	Tracheophyta	Magnoliopsida	Myrtales	Combretaceae	Terminalia	Terminalia neotaliala	Sunny	Heliophyte	Moist	Park	Tree (<10m)	5-10cm	121.8	Vegetative	Loamy	Red	23.43	10.07	40.27	19.72	City Park	Longmo Lake	23.999	97.8404	730
T244	CD_RS16	Tracheophyta	Magnoliopsida	Myrtales	Melastomataceae	Tibouchina	Tibouchina semidecandra	Sunny	Heliophyte	Moist	Park	Shrub (>2m)	0-5cm	117.1	Flowering	Loamy	Brown	27.17	11.27	45.07	22.14	City Park	Nanmao Lake	24.0088	97.8711	720
T244	CD_RS17	Tracheophyta	Magnoliopsida	Myrtales	Melastomataceae	Tibouchina	Tibouchina semidecandra	Sunny	Heliophyte	Moist	Park	Shrub (>2m)	0-5cm	106.1	Flowering	Loamy	Brown	27.17	11.27	45.07	22.14	City Park	Nanmao Lake	24.0088	97.8711	720
T244	CD_RS15	Tracheophyta	Magnoliopsida	Myrtales	Melastomataceae	Tibouchina	Tibouchina semidecandra	Sunny	Heliophyte	Moist	Park	Shrub (>2m)	0-5cm	99.8	Flowering	Loamy	Brown	27.17	11.27	45.07	22.14	City Park	Nanmao Lake	24.0088	97.8711	720
T159	KH_RS24	Tracheophyta	Magnoliopsida	Oxalidales	Oxalidaceae	Averrhoa	Averrhoa carambola	Sunny	Heliophyte	Dry	Park	Tree (<10m)	5-10cm	104.2	Vegetative	Loamy	Brown	35.3	13.73	55.33	25.77	City Park	Nanmao Lake	24.011	97.871	726
T159	KH_RS23	Tracheophyta	Magnoliopsida	Oxalidales	Oxalidaceae	Averrhoa	Averrhoa carambola	Sunny	Heliophyte	Dry	Park	Tree (<10m)	5-10cm	101.2	Vegetative	Loamy	Brown	35.3	13.73	55.33	25.77	City Park	Nanmao Lake	24.011	97.871	726
T159	KH_RS22	Tracheophyta	Magnoliopsida	Oxalidales	Oxalidaceae	Averrhoa	Averrhoa carambola	Sunny	Heliophyte	Dry	Park	Tree (<10m)	5-10cm	121.6	Vegetative	Loamy	Brown	35.3	13.73	55.33	25.77	City Park	Nanmao Lake	24.011	97.871	726
T298	ZH_RS09	Tracheophyta	Magnoliopsida	Oxalidales	Elaeocarpaceae	Elaeocarpus	Elaeocarpus austroyunnanensis	Sunny	Heliophyte	Moist	Reserve	Tree (>10m)	5-10cm	68.1	Vegetative	Loamy	Brown					Moli Rainforest	Moli Rainforest	24.1149	97.9825	883
T020	LV_RS07	Tracheophyta	Magnoliopsida	Oxalidales	Elaeocarpaceae	Elaeocarpus	Elaeocarpus dubius	Sunny	Heliophyte	Moist	Hillside		5-10cm	102.1	Vegetative	Loamy	Brown	39.6	15.2	60.8	32.87	Botanical Garden	Botanical Garden	24.0699	97.818	1094
C015	FD_RS02	Tracheophyta	Magnoliopsida	Oxalidales	Elaeocarpaceae	Elaeocarpus	Elaeocarpus rugosus	Sunny	Skiophyte	Moist	Reserve	Tree (<10m)	0-5cm	94.6	Vegetative	Loamy	Brown	37.9	14.63	58.53	17.64	Moli Rainforest	Moli Rainforest	24.1072	97.9849	835
D008	LU_RS09	Tracheophyta	Magnoliopsida	Oxalidales	Oxalidaceae	Oxalis	Oxalis latifolia	Sunny	Skiophyte	Moist	Hillside	Herb	0-5cm	46.3	Flowering	Loamy	Brown	23.7	10.13	40.53	21.75	Botanical Garden	Botanical Garden	24.0685	97.8213	1094
T177	LJ_RS10	Tracheophyta	Liliopsida	Pandanales	Pandanaceae	Pandanus	Pandanus urophyllus	Sunny	Heliophyte	Moist	Park	Tree (<10m)	0-5cm	101.8	Vegetative	Loamy	Brown	46.53	17.37	69.47	24.95	City Park	Nanmao Lake	24.011	97.8724	727
T177	LJ_RS11	Tracheophyta	Liliopsida	Pandanales	Pandanaceae	Pandanus	Pandanus urophyllus	Sunny	Heliophyte	Moist	Park	Tree (<10m)	0-5cm	98.9	Vegetative	Loamy	Brown	46.53	17.37	69.47	24.95	City Park	Nanmao Lake	24.011	97.8724	727
T177	LJ_RS12	Tracheophyta	Liliopsida	Pandanales	Pandanaceae	Pandanus	Pandanus urophyllus	Sunny	Heliophyte	Moist	Park	Tree (<10m)	0-5cm	98.9	Vegetative	Loamy	Brown	46.53	17.37	69.47	24.95	City Park	Nanmao Lake	24.011	97.8724	727
T273	XI_RS06	Tracheophyta	Liliopsida	Pandanales	Pandanaceae	Pandanus	Pandanus urophyllus	Sunny	Heliophyte	Moist	Reserve	Tree (<10m)	5-10cm	101.9	Vegetative	Loamy	Brown					Moli Rainforest	Moli Rainforest	24.1119	97.985	827
T273	XI_RS07	Tracheophyta	Liliopsida	Pandanales	Pandanaceae	Pandanus	Pandanus urophyllus	Sunny	Heliophyte	Moist	Reserve	Tree (<10m)	5-10cm	101.4	Vegetative	Loamy	Brown					Moli Rainforest	Moli Rainforest	24.1119	97.985	827
T273	XI_RS08	Tracheophyta	Liliopsida	Pandanales	Pandanaceae	Pandanus	Pandanus urophyllus	Sunny	Heliophyte	Moist	Reserve	Tree (<10m)	5-10cm	115.8	Vegetative	Loamy	Brown					Moli Rainforest	Moli Rainforest	24.1119	97.985	827
T182	LF_RS20	Tracheophyta	Liliopsida	Pandanales	Pandanaceae	Pandanus	Pandanus utilis	Sunny	Heliophyte	Moist	Park	Tree (<10m)	5-10cm	101	Vegetative	Loamy	Brown	42.03	15.97	63.87	25.96	City Park	Nanmao Lake	24.0106	97.8693	731
T182	LF_RS22	Tracheophyta	Liliopsida	Pandanales	Pandanaceae	Pandanus	Pandanus utilis	Sunny	Heliophyte	Moist	Park	Tree (<10m)	5-10cm	106.2	Vegetative	Loamy	Brown	42.03	15.97	63.87	25.96	City Park	Nanmao Lake	24.0106	97.8693	731
T182	LF_RS21	Tracheophyta	Liliopsida	Pandanales	Pandanaceae	Pandanus	Pandanus utilis	Sunny	Heliophyte	Moist	Park	Tree (<10m)	5-10cm	101.5	Vegetative	Loamy	Brown	42.03	15.97	63.87	25.96	City Park	Nanmao Lake	24.0106	97.8693	731
B002	ZG_RS02	Tracheophyta	Liliopsida	Pandanales	Stemonaceae	Stemona	Stemona tuberosa	Sunny	Skiophyte	Moist	Hillside	Vine	5-10cm	102.6	Vegetative	Loamy	Brown	30.27	12.17	48.67	16.08	Botanical Garden	Botanical Garden	24.0693	97.82	1109
E050	XD_RS06	Tracheophyta	Pinopsida	Pinales	Araucariaceae	Araucaria	Araucaria bidwillii	Shower	Heliophyte	Moist	Hillside	Tree (<10m)	15-20cm	96.5	Vegetative	Loamy	Brown					Botanical Garden	Botanical Garden	24.0698	97.8193	1120
A036	LS_RS08	Tracheophyta	Pinopsida	Pinales	Cupressaceae	Metasequoia	Metasequoia glyptostroboides	Sunny	Heliophyte	Moist	Hillside	Tree (<10m)	5-10cm	104.1	Vegetative	Loamy	Brown					Botanical Garden	Botanical Garden	24.0698	97.8193	1121
T132	LG_RS11	Tracheophyta	Pinopsida	Pinales	Cupressaceae	Platycladus	Platycladus orientalis	Sunny	Heliophyte	Moist	Park	Tree (<10m)	5-10cm	69.2	Vegetative	Loamy	Brown					City Park	Nanmao Lake	24.0105	97.8726	724
T232	FC_RS24	Tracheophyta	Pinopsida	Pinales	Cupressaceae	Platycladus	Platycladus orientalis	Sunny	Heliophyte	Moist	Park	Tree (<10m)	5-10cm	99.6	Vegetative	Loamy	Brown					City Park	Nanmao Lake	24.0118	97.8713	730
T090	LS_RS06	Tracheophyta	Pinopsida	Pinales	Podocarpaceae	Podocarpus	Podocarpus macrophyllus	Sunny	Skiophyte	Moist	Hillside	Tree (<10m)	5-10cm	101.3	Vegetative	Loamy	Red	39.77	15.23	60.93	23.47	Botanical Garden	Botanical Garden	24.0694	97.8199	1111
T090	LS_RS05	Tracheophyta	Pinopsida	Pinales	Podocarpaceae	Podocarpus	Podocarpus macrophyllus	Sunny	Skiophyte	Moist	Hillside	Tree (<10m)	5-10cm	107.4	Vegetative	Loamy	Red	39.77	15.23	60.93	23.47	Botanical Garden	Botanical Garden	24.0694	97.8199	1111
T090	LS_RS04	Tracheophyta	Pinopsida	Pinales	Podocarpaceae	Podocarpus	Podocarpus macrophyllus	Sunny	Skiophyte	Moist	Hillside	Tree (<10m)	5-10cm	102.2	Vegetative	Loamy	Red	39.77	15.23	60.93	23.47	Botanical Garden	Botanical Garden	24.0694	97.8199	1111
T198	XJ_RS13	Tracheophyta	Pinopsida	Pinales	Podocarpaceae	Podocarpus	Podocarpus macrophyllus	Shower	Skiophyte	Moist	Park	Tree (<10m)	5-10cm	101.9	Vegetative	Loamy	Yellow					City Park	Nanmao Lake	24.0117	97.872	727
T198	XJ_RS15	Tracheophyta	Pinopsida	Pinales	Podocarpaceae	Podocarpus	Podocarpus macrophyllus	Shower	Skiophyte	Moist	Park	Tree (<10m)	5-10cm	100.3	Vegetative	Loamy	Yellow					City Park	Nanmao Lake	24.0117	97.872	727
T198	XJ_RS14	Tracheophyta	Pinopsida	Pinales	Podocarpaceae	Podocarpus	Podocarpus macrophyllus	Shower	Skiophyte	Moist	Park	Tree (<10m)	5-10cm	105.6	Vegetative	Loamy	Yellow					City Park	Nanmao Lake	24.0117	97.872	727
A026	HB_RS09	Tracheophyta	Pinopsida	Pinales	Podocarpaceae	Podocarpus	Podocarpus neriifolius	Sunny	Skiophyte	Moist	Hillside	Tree (<10m)	5-10cm	100	Vegetative	Loamy	Brown	34.27	13.5	54	25.58	Botanical Garden	Botanical Garden	24.0693	97.8204	1093
A026	HB_RS08	Tracheophyta	Pinopsida	Pinales	Podocarpaceae	Podocarpus	Podocarpus neriifolius	Sunny	Skiophyte	Moist	Hillside	Tree (<10m)	5-10cm	104.9	Vegetative	Loamy	Brown	34.27	13.5	54	25.58	Botanical Garden	Botanical Garden	24.0693	97.8204	1093
A026	HB_RS10	Tracheophyta	Pinopsida	Pinales	Podocarpaceae	Podocarpus	Podocarpus neriifolius	Sunny	Skiophyte	Moist	Hillside	Tree (<10m)	5-10cm	100.3	Vegetative	Loamy	Brown	34.27	13.5	54	25.58	Botanical Garden	Botanical Garden	24.0693	97.8204	1093
E022	KA_RS06	Tracheophyta	Pinopsida	Pinales	Taxaceae	Taxus	Taxus wallichiana	Shower	Heliophyte	Moist	Hillside	Tree (<10m)	0-5cm	103.4	Fruiting	Loamy	Brown					Botanical Garden	Botanical Garden	24.0706	97.8197	1080
C026	KG_RS24	Tracheophyta	Magnoliopsida	Piperales	Aristolochiaceae	Aristolochia	Aristolochia acuminata	Sunny	Skiophyte	Moist	Reserve	Vine	0-5cm	74.1	Vegetative	Loamy	Brown	25.2	10.63	42.53	18.95	Moli Rainforest	Moli Rainforest	24.106	97.9829	838
E080	XD_RS11	Tracheophyta	Magnoliopsida	Piperales	Aristolochiaceae	Aristolochia	Aristolochia debilis	Shower	Skiophyte	Moist	Hillside	Vine	0-5cm	102.4	Vegetative	Loamy	Brown	33.07	13.77	52.5	16.23	Botanical Garden	Botanical Garden	24.0705	97.8177	1111
T237	ZH_RS01	Tracheophyta	Magnoliopsida	Piperales	Saururaceae	Houttuynia	Houttuynia cordata	Sunny	Skiophyte	Moist	Hillside	Herb	0-5cm	112.2	Vegetative	Loamy	Brown					Botanical Garden	Botanical Garden	24.0699	97.8192	1110
T349	LA_RS15	Tracheophyta	Magnoliopsida	Piperales	Saururaceae	Houttuynia	Houttuynia cordata	Sunny	Skiophyte	Moist	Park	Herb	0-5cm	104.9	Vegetative	Loamy	Red	27.77	11.43	45.73	26.62	City Park	Longmo Lake	24.0024	97.8422	730
T349	LA_RS17	Tracheophyta	Magnoliopsida	Piperales	Saururaceae	Houttuynia	Houttuynia cordata	Sunny	Skiophyte	Moist	Park	Herb	0-5cm	112.3	Vegetative	Loamy	Red	27.77	11.43	45.73	26.62	City Park	Longmo Lake	24.0024	97.8422	730
T349	LA_RS16	Tracheophyta	Magnoliopsida	Piperales	Saururaceae	Houttuynia	Houttuynia cordata	Sunny	Skiophyte	Moist	Park	Herb	0-5cm	106.5	Vegetative	Loamy	Red	27.77	11.43	45.73	26.62	City Park	Longmo Lake	24.0024	97.8422	730
E018	KA_RS20	Tracheophyta	Magnoliopsida	Piperales	Piperaceae	Piper	Piper macropodum	Shower	Skiophyte	Moist	Hillside	Vine	0-5cm	104.1	Vegetative	Loamy	Brown	40.03	15.3	61.2	18.75	Botanical Garden	Botanical Garden	24.0706	97.8197	1080
B060	KC_RS03	Tracheophyta	Magnoliopsida	Piperales	Piperaceae	Piper	Piper mullesua	Sunny	Skiophyte	Moist	Hillside	Shrub (<2m)	0-5cm	99.4	Vegetative	Loamy	Brown	35.5	13.87	55.47	17.6	Botanical Garden	Botanical Garden	24.0713	97.8168	1124
B060	KC_RS06	Tracheophyta	Magnoliopsida	Piperales	Piperaceae	Piper	Piper mullesua	Sunny	Skiophyte	Moist	Hillside	Shrub (<2m)	0-5cm	102.5	Vegetative	Loamy	Brown	35.5	13.87	55.47	17.6	Botanical Garden	Botanical Garden	24.0713	97.8168	1124
B060	KC_RS04	Tracheophyta	Magnoliopsida	Piperales	Piperaceae	Piper	Piper mullesua	Sunny	Skiophyte	Moist	Hillside	Shrub (<2m)	0-5cm	101.5	Vegetative	Loamy	Brown	35.5	13.87	55.47	17.6	Botanical Garden	Botanical Garden	24.0713	97.8168	1124
C074	XH_RS16	Tracheophyta	Magnoliopsida	Piperales	Piperaceae	Piper	Piper mullesua	Sunny	Skiophyte	Moist	Reserve	Shrub (<2m)	5-10cm	92	Vegetative	Loamy	Brown	32	12.77	51.4	17.75	Moli Rainforest	Moli Rainforest	24.1153	97.9818	900
C074	XH_RS14	Tracheophyta	Magnoliopsida	Piperales	Piperaceae	Piper	Piper mullesua	Sunny	Skiophyte	Moist	Reserve	Shrub (<2m)	5-10cm	104.1	Vegetative	Loamy	Brown	32	12.77	51.4	17.75	Moli Rainforest	Moli Rainforest	24.1153	97.9818	900
C074	XH_RS15	Tracheophyta	Magnoliopsida	Piperales	Piperaceae	Piper	Piper mullesua	Sunny	Skiophyte	Moist	Reserve	Shrub (<2m)	5-10cm	99.3	Vegetative	Loamy	Brown	32	12.77	51.4	17.75	Moli Rainforest	Moli Rainforest	24.1153	97.9818	900
C025	KG_RS23	Tracheophyta	Magnoliopsida	Piperales	Piperaceae	Piper	Piper nigrum	Sunny	Skiophyte	Moist	Reserve	Vine	0-5cm	100.3	Vegetative	Loamy	Brown	34.07	13.4	53.6	18.74	Moli Rainforest	Moli Rainforest	24.1067	97.9835	838
E072	XD_RS24	Tracheophyta	Magnoliopsida	Piperales	Piperaceae	Piper	Piper ornatum	Shower	Skiophyte	Moist	Hillside		0-5cm	100.2	Vegetative	Loamy	Brown	38.03	14.7	58.8	15.41	Botanical Garden	Botanical Garden	24.0705	97.8182	1111
C061	FC_RS12	Tracheophyta	Liliopsida	Poales	Poaceae	Arrhenatherum	Arrhenatherum elatius	Sunny	Heliophyte	Moist	Reserve	Herb	0-5cm	115.2	Fruiting	Loamy	Brown					Moli Rainforest	Moli Rainforest	24.1159	97.9803	932
C061	FC_RS15	Tracheophyta	Liliopsida	Poales	Poaceae	Arrhenatherum	Arrhenatherum elatius	Sunny	Heliophyte	Moist	Reserve	Herb	0-5cm	111	Fruiting	Loamy	Brown					Moli Rainforest	Moli Rainforest	24.1159	97.9803	932
C061	FC_RS19	Tracheophyta	Liliopsida	Poales	Poaceae	Arrhenatherum	Arrhenatherum elatius	Sunny	Heliophyte	Moist	Reserve	Herb	0-5cm	102.7	Fruiting	Loamy	Brown					Moli Rainforest	Moli Rainforest	24.1159	97.9803	932
B004	ZG_RS04	Tracheophyta	Liliopsida	Poales	Poaceae	Bambusa	Bambusa burmanica	Sunny	Skiophyte	Dry	Hillside	Herb	0-5cm	123.2	Vegetative	Loamy	Brown	31.8	12.73	50.93	15.62	Botanical Garden	Botanical Garden	24.0692	97.8192	1109
B089	XE_RS08	Tracheophyta	Liliopsida	Poales	Cyperaceae	Carex	Carex baccans	Sunny	Skiophyte	Moist	Hillside	Herb	0-5cm	65.9	Vegetative	Loamy	Brown					Botanical Garden	Botanical Garden	24.0711	97.818	1140
E081	XD_RS12	Tracheophyta	Liliopsida	Poales	Cyperaceae	Carex	Carex haematostoma	Shower	Skiophyte	Moist	Hillside	Herb	0-5cm	97.5	Vegetative	Loamy	Brown					Botanical Garden	Botanical Garden	24.0705	97.8176	1111
T334	ZB_RS02	Tracheophyta	Liliopsida	Poales	Poaceae	Coix	Coix lacryma-jobi	Sunny	Heliophyte	Moist	Park	Herb	0-5cm	110.7	Fruiting	Loamy	Red	16.43	7.83	31.33	24.76	City Park	Longmo Lake	24.0021	97.8426	730
T055	XA_RS21	Tracheophyta	Liliopsida	Poales	Poaceae	Cymbopogon	Cymbopogon citratus	Sunny	Heliophyte	Moist	Nursery	Herb	5-10cm	59.1	Vegetative	Loamy	Brown	17.57	8.17	32.67	31.21	Wanding Town	Huihuan Village	24.1194	98.0467	739
T271	XI_RS02	Tracheophyta	Liliopsida	Poales	Cyperaceae	Cyperus	Cyperus involucratus	Sunny	Skiophyte	Moist	Reserve	Herb	5-10cm	96.4	Flowering	Loamy	Brown	32.87	13.03	52.13	18.7	Moli Rainforest	Moli Rainforest	24.1101	97.9859	834
B093	XE_RS15	Tracheophyta	Liliopsida	Poales	Poaceae	Dendrocalamus	Dendrocalamus latiflorus	Sunny	Skiophyte	Moist	Hillside	Herb	5-10cm	105.3	Vegetative	Loamy	Brown	37.2	14.4	57.6	21.85	Botanical Garden	Botanical Garden	24.0711	97.818	1132
B093	XE_RS13	Tracheophyta	Liliopsida	Poales	Poaceae	Dendrocalamus	Dendrocalamus latiflorus	Sunny	Skiophyte	Moist	Hillside	Herb	5-10cm	129.6	Vegetative	Loamy	Brown	37.2	14.4	57.6	21.85	Botanical Garden	Botanical Garden	24.0711	97.818	1132
B093	XE_RS14	Tracheophyta	Liliopsida	Poales	Poaceae	Dendrocalamus	Dendrocalamus latiflorus	Sunny	Skiophyte	Moist	Hillside	Herb	5-10cm	106	Vegetative	Loamy	Brown	37.2	14.4	57.6	21.85	Botanical Garden	Botanical Garden	24.0711	97.818	1132
B087	XE_RS04	Tracheophyta	Liliopsida	Poales	Poaceae	Digitaria	Digitaria ciliaris	Sunny	Skiophyte	Moist	Hillside	Herb	0-5cm	37.8	Vegetative	Loamy	Brown	28.97	11.8	47.2	22.14	Botanical Garden	Botanical Garden	24.0714	97.8177	1151
B044	HE_RS17	Tracheophyta	Liliopsida	Poales	Poaceae	Eleusine	Eleusine indica	Sunny	Heliophyte	Moist	Hillside	Herb	0-5cm	101.3	Fruiting	Loamy	Brown					Botanical Garden	Botanical Garden	24.0701	97.8182	1119
T348	LA_RS12	Tracheophyta	Liliopsida	Poales	Poaceae	Eleusine	Eleusine indica	Sunny	Skiophyte	Moist	Park	Herb	0-5cm	109.4	Flowering	Loamy	Red					City Park	Longmo Lake	24.0024	97.8422	730
T348	LA_RS13	Tracheophyta	Liliopsida	Poales	Poaceae	Eleusine	Eleusine indica	Sunny	Skiophyte	Moist	Park	Herb	0-5cm	101.7	Flowering	Loamy	Red					City Park	Longmo Lake	24.0024	97.8422	730
T348	LA_RS14	Tracheophyta	Liliopsida	Poales	Poaceae	Eleusine	Eleusine indica	Sunny	Skiophyte	Moist	Park	Herb	0-5cm	105.2	Flowering	Loamy	Red					City Park	Longmo Lake	24.0024	97.8422	730
E082	XD_RS13	Tracheophyta	Liliopsida	Poales	Poaceae	Lophatherum	Lophatherum gracile	Shower	Skiophyte	Moist	Hillside	Herb	0-5cm	116.9	Vegetative	Loamy	Brown	30.27	12.23	49.03	16.1	Botanical Garden	Botanical Garden	24.0705	97.8176	1111
T406	LD_RS23	Tracheophyta	Liliopsida	Poales	Poaceae	Neyraudia	Neyraudia reynaudiana	Sunny	Heliophyte	Moist	Park	Herb	5-10cm	106.7	Fruiting	Loamy	Red	24.23	10.3	41.2	20.39	City Park	Longmo Lake	24.0019	97.8352	730
E040	XC_RS03	Tracheophyta	Liliopsida	Poales	Poaceae	Oplismenus	Oplismenus compositus	Shower	Skiophyte	Moist	Hillside	Herb	0-5cm	95.3	Vegetative	Loamy	Brown	24.6	10.43	41.73	17.81	Botanical Garden	Botanical Garden	24.0703	97.8198	1094
E039	XC_RS04	Tracheophyta	Liliopsida	Poales	Poaceae	Paspalum	Paspalum conjugatum	Shower	Skiophyte	Moist	Hillside	Herb	0-5cm	101.8	Vegetative	Loamy	Brown	30.93	12.43	49.73	18.08	Botanical Garden	Botanical Garden	24.0704	97.82	1092
T040	LQ_RS10	Tracheophyta	Liliopsida	Poales	Poaceae	Poaceae unassigned	Poaceae unassigned	Sunny	Heliophyte	Moist	Hillside		5-10cm	100.4	Vegetative	Loamy	Brown	30.77	12.37	49.47	22.93	Botanical Garden	Jingcheng Ariport	24.0686	97.8154	1116
T040	LQ_RS11	Tracheophyta	Liliopsida	Poales	Poaceae	Poaceae unassigned	Poaceae unassigned	Sunny	Heliophyte	Moist	Hillside		5-10cm	99.1	Vegetative	Loamy	Brown	30.77	12.37	49.47	22.93	Botanical Garden	Jingcheng Ariport	24.0686	97.8154	1116
T041	LQ_RS13	Tracheophyta	Liliopsida	Poales	Poaceae	Poaceae unassigned	Poaceae unassigned	Sunny	Heliophyte	Dry	Hillside		10-15cm	99.5	Vegetative	Loamy	Brown	30.67	12.33	49.33	22.73	Botanical Garden	Jingcheng Ariport	24.0687	97.8155	1116
T041	LQ_RS14	Tracheophyta	Liliopsida	Poales	Poaceae	Poaceae unassigned	Poaceae unassigned	Sunny	Heliophyte	Dry	Hillside		10-15cm	101.7	Vegetative	Loamy	Brown	30.67	12.33	49.33	22.73	Botanical Garden	Jingcheng Ariport	24.0687	97.8155	1116
T041	LQ_RS12	Tracheophyta	Liliopsida	Poales	Poaceae	Poaceae unassigned	Poaceae unassigned	Sunny	Heliophyte	Dry	Hillside		10-15cm	98.9	Vegetative	Loamy	Brown	30.67	12.33	49.33	22.73	Botanical Garden	Jingcheng Ariport	24.0687	97.8155	1116
T042	LQ_RS17	Tracheophyta	Liliopsida	Poales	Poaceae	Poaceae unassigned	Poaceae unassigned	Sunny	Heliophyte	Dry	Hillside		10-15cm	99.9	Vegetative	Loamy	Brown	26	10.87	43.47	23.04	Botanical Garden	Jingcheng Ariport	24.0687	97.8156	1116
T042	LQ_RS16	Tracheophyta	Liliopsida	Poales	Poaceae	Poaceae unassigned	Poaceae unassigned	Sunny	Heliophyte	Dry	Hillside		10-15cm	100.6	Vegetative	Loamy	Brown	26	10.87	43.47	23.04	Botanical Garden	Jingcheng Ariport	24.0687	97.8156	1116
T042	LQ_RS15	Tracheophyta	Liliopsida	Poales	Poaceae	Poaceae unassigned	Poaceae unassigned	Sunny	Heliophyte	Dry	Hillside		10-15cm	99.9	Vegetative	Loamy	Brown	26	10.87	43.47	23.04	Botanical Garden	Jingcheng Ariport	24.0687	97.8156	1116
T043	LQ_RS18	Tracheophyta	Liliopsida	Poales	Poaceae	Poaceae unassigned	Poaceae unassigned	Sunny	Heliophyte	Moist	Hillside		10-15cm	101.6	Vegetative	Loamy	Red	30.7	12.37	49.47	23.81	Botanical Garden	Jingcheng Ariport	24.0687	97.8156	1116
T044	LQ_RS21	Tracheophyta	Liliopsida	Poales	Poaceae	Poaceae unassigned	Poaceae unassigned	Sunny	Heliophyte	Moist	Hillside		10-15cm	100.6	Vegetative	Loamy	Red	34.1	13.43	53.73	24.39	Botanical Garden	Jingcheng Ariport	24.0688	97.8156	1116
T044	LQ_RS20	Tracheophyta	Liliopsida	Poales	Poaceae	Poaceae unassigned	Poaceae unassigned	Sunny	Heliophyte	Moist	Hillside		10-15cm	100.2	Vegetative	Loamy	Red	34.1	13.43	53.73	24.39	Botanical Garden	Jingcheng Ariport	24.0688	97.8156	1116
T044	LQ_RS19	Tracheophyta	Liliopsida	Poales	Poaceae	Poaceae unassigned	Poaceae unassigned	Sunny	Heliophyte	Moist	Hillside		10-15cm	92.3	Vegetative	Loamy	Red	34.1	13.43	53.73	24.39	Botanical Garden	Jingcheng Ariport	24.0688	97.8156	1116
T046	LQ_RS24	Tracheophyta	Liliopsida	Poales	Poaceae	Poaceae unassigned	Poaceae unassigned	Sunny	Heliophyte	Dry	Hillside		5-10cm	100.4	Vegetative	Loamy	Yellow	22.8	10.17	39.33	22.89	Botanical Garden	Jingcheng Ariport	24.0687	97.8156	1116
T047	LP_RS02	Tracheophyta	Liliopsida	Poales	Poaceae	Poaceae unassigned	Poaceae unassigned	Sunny	Heliophyte	Dry	Hillside		5-10cm	101.5	Vegetative	Loamy	Yellow					Botanical Garden	Jingcheng Ariport	24.0687	97.8154	1116
T047	LP_RS01	Tracheophyta	Liliopsida	Poales	Poaceae	Poaceae unassigned	Poaceae unassigned	Sunny	Heliophyte	Dry	Hillside		5-10cm	101.3	Vegetative	Loamy	Yellow					Botanical Garden	Jingcheng Ariport	24.0687	97.8154	1116
T047	LP_RS03	Tracheophyta	Liliopsida	Poales	Poaceae	Poaceae unassigned	Poaceae unassigned	Sunny	Heliophyte	Dry	Hillside		5-10cm	100.7	Vegetative	Loamy	Yellow					Botanical Garden	Jingcheng Ariport	24.0687	97.8154	1116
E089	XD_RS22	Tracheophyta	Liliopsida	Poales	Poaceae	Schizostachyum	Schizostachyum pergracile	Shower	Heliophyte	Moist	Hillside	Herb	5-10cm	77.3	Vegetative	Loamy	Brown	31.87	12.73	50.93	17.1	Botanical Garden	Botanical Garden	24.0705	97.8171	1147
B003	ZG_RS03	Tracheophyta	Liliopsida	Poales	Poaceae	Schizostachyum	Schizostachyum virgatum	Sunny	Skiophyte	Dry	Hillside	Herb	0-5cm	111.2	Vegetative	Loamy	Brown	28.27	11.6	46.4	15.66	Botanical Garden	Botanical Garden	24.0692	97.8192	1109
B125	HD_RS18	Tracheophyta	Liliopsida	Poales	Poaceae	Setaria	Setaria palmifolia	Sunny	Heliophyte	Moist	Hillside	Herb	0-5cm	107.2	Vegetative	Loamy	Brown	29.53	12	48	19.66	Botanical Garden	Botanical Garden	24.0683	97.8194	1068
B127	XF_RS21	Tracheophyta	Liliopsida	Poales	Poaceae	Thysanolaena	Thysanolaena latifolia	Sunny	Skiophyte	Moist	Hillside	Herb	0-5cm	117	Vegetative	Loamy	Brown	22.07	9.63	38.53	21.04	Botanical Garden	Botanical Garden	24.0681	97.8201	1072
B127	XF_RS22	Tracheophyta	Liliopsida	Poales	Poaceae	Thysanolaena	Thysanolaena latifolia	Sunny	Skiophyte	Moist	Hillside	Herb	0-5cm	105.2	Vegetative	Loamy	Brown	22.07	9.63	38.53	21.04	Botanical Garden	Botanical Garden	24.0681	97.8201	1072
B127	XF_RS23	Tracheophyta	Liliopsida	Poales	Poaceae	Thysanolaena	Thysanolaena latifolia	Sunny	Skiophyte	Moist	Hillside	Herb	0-5cm	100.2	Vegetative	Loamy	Brown	22.07	9.63	38.53	21.04	Botanical Garden	Botanical Garden	24.0681	97.8201	1072
E066	KA_RS12	Tracheophyta	Polypodiopsida	Polypodiales	Pteridaceae	Adiantum	Adiantum capillus-junonis	Shower	Skiophyte	Moist	Hillside	Herb	0-5cm	123.3	Vegetative	Loamy	Brown					Botanical Garden	Botanical Garden	24.0704	97.8185	1116
T306	ZH_RS15	Tracheophyta	Polypodiopsida	Polypodiales	Aspleniaceae	Asplenium	Asplenium nidus	Sunny	Skiophyte	Moist	Reserve	Herb	0-5cm	66.4	Vegetative	Loamy	Brown	24.63	10.43	41.73	19.27	Moli Rainforest	Moli Rainforest	24.1159	97.9802	951
B050	KD_RS04	Tracheophyta	Polypodiopsida	Polypodiales	Dryopteridaceae	Bolbitis	Bolbitis heteroclita	Sunny	Skiophyte	Moist	Hillside	Herb	0-5cm	64.5	Vegetative	Loamy	Brown	26.47	11.03	44.13	16.56	Botanical Garden	Botanical Garden	24.0706	97.8176	1122
B050	KD_RS03	Tracheophyta	Polypodiopsida	Polypodiales	Dryopteridaceae	Bolbitis	Bolbitis heteroclita	Sunny	Skiophyte	Moist	Hillside	Herb	0-5cm	77	Vegetative	Loamy	Brown	26.47	11.03	44.13	16.56	Botanical Garden	Botanical Garden	24.0706	97.8176	1122
B050	KD_RS02	Tracheophyta	Polypodiopsida	Polypodiales	Dryopteridaceae	Bolbitis	Bolbitis heteroclita	Sunny	Skiophyte	Moist	Hillside	Herb	0-5cm	103.7	Vegetative	Loamy	Brown	26.47	11.03	44.13	16.56	Botanical Garden	Botanical Garden	24.0706	97.8176	1122
A001	LV_RS01	Tracheophyta	Polypodiopsida	Polypodiales	Blechnaceae	Brainea	Brainea insignis	Sunny	Skiophyte	Moist	Hillside	Herb	15-20cm	111	Vegetative	Loamy	Brown					Botanical Garden	Botanical Garden	24.0699	97.818	1110
T146	LV_RS22	Tracheophyta	Polypodiopsida	Polypodiales	Nephrolepidaceae	Nephrolepis	Nephrolepis cordifolia	Sunny	Skiophyte	Dry	Park	Herb	0-5cm	117.8	Vegetative	Loamy	Brown					City Park	Nanmao Lake	24.0093	97.8702	729
T146	LV_RS24	Tracheophyta	Polypodiopsida	Polypodiales	Nephrolepidaceae	Nephrolepis	Nephrolepis cordifolia	Sunny	Skiophyte	Dry	Park	Herb	0-5cm	82.8	Vegetative	Loamy	Brown					City Park	Nanmao Lake	24.0093	97.8702	729
T146	LV_RS23	Tracheophyta	Polypodiopsida	Polypodiales	Nephrolepidaceae	Nephrolepis	Nephrolepis cordifolia	Sunny	Skiophyte	Dry	Park	Herb	0-5cm	101.8	Vegetative	Loamy	Brown					City Park	Nanmao Lake	24.0093	97.8702	729
T395	ZD_RS24	Tracheophyta	Polypodiopsida	Polypodiales	Nephrolepidaceae	Nephrolepis	Nephrolepis cordifolia	Sunny	Heliophyte	Moist	Park	Herb	0-5cm	80.2	Vegetative	Loamy	Red					City Park	Longmo Lake	24.0019	97.835	730
T395	ZD_RS22	Tracheophyta	Polypodiopsida	Polypodiales	Nephrolepidaceae	Nephrolepis	Nephrolepis cordifolia	Sunny	Heliophyte	Moist	Park	Herb	0-5cm	128.7	Vegetative	Loamy	Red					City Park	Longmo Lake	24.0019	97.835	730
T395	ZD_RS23	Tracheophyta	Polypodiopsida	Polypodiales	Nephrolepidaceae	Nephrolepis	Nephrolepis cordifolia	Sunny	Heliophyte	Moist	Park	Herb	0-5cm	87.4	Vegetative	Loamy	Red					City Park	Longmo Lake	24.0019	97.835	730
E035	LK_RS01	Tracheophyta	Polypodiopsida	Polypodiales	Lindsaeaceae	Odontosoria	Odontosoria chinensis	Shower	Skiophyte	Moist	Hillside	Herb	0-5cm	103.6	Vegetative	Loamy	Brown					Botanical Garden	Botanical Garden	24.0705	97.8198	1092
B100	KB_RS11	Tracheophyta	Polypodiopsida	Polypodiales	Thelypteridaceae	Pronephrium	Pronephrium gymnopteridifrons	Sunny	Skiophyte	Moist	Hillside	Herb	5-10cm	112	Vegetative	Loamy	Brown	33.27	13.17	52.67	17.45	Botanical Garden	Botanical Garden	24.0699	97.8177	1113
B100	KB_RS10	Tracheophyta	Polypodiopsida	Polypodiales	Thelypteridaceae	Pronephrium	Pronephrium gymnopteridifrons	Sunny	Skiophyte	Moist	Hillside	Herb	5-10cm	115.5	Vegetative	Loamy	Brown	33.27	13.17	52.67	17.45	Botanical Garden	Botanical Garden	24.0699	97.8177	1113
B100	KB_RS09	Tracheophyta	Polypodiopsida	Polypodiales	Thelypteridaceae	Pronephrium	Pronephrium gymnopteridifrons	Sunny	Skiophyte	Moist	Hillside	Herb	5-10cm	110.9	Vegetative	Loamy	Brown	33.27	13.17	52.67	17.45	Botanical Garden	Botanical Garden	24.0699	97.8177	1113
B079	XF_RS09	Tracheophyta	Polypodiopsida	Polypodiales	Dennstaedtiaceae	Pteridium	Pteridium unassigned	Sunny	Skiophyte	Moist	Hillside	Herb	0-5cm	102.3	Vegetative	Loamy	Brown	24.1	10.27	41.13	21.83	Botanical Garden	Botanical Garden	24.0721	97.8164	1145
T289	CB_RS05	Tracheophyta	Polypodiopsida	Polypodiales	Dennstaedtiaceae	Pteridium	Pteridium unassigned	Sunny	Skiophyte	Moist	Reserve	Herb	5-10cm	23.4	Vegetative	Loamy	Brown					Moli Rainforest	Moli Rainforest	24.1128	97.9834	877
T289	KF_RS18	Tracheophyta	Polypodiopsida	Polypodiales	Dennstaedtiaceae	Pteridium	Pteridium unassigned	Sunny	Skiophyte	Moist	Reserve	Herb	5-10cm	60.1	Vegetative	Loamy	Brown					Moli Rainforest	Moli Rainforest	24.1128	97.9834	877
B076	XF_RS07	Tracheophyta	Magnoliopsida	Proteales	Proteaceae	Helicia	Helicia shweliensis	Sunny	Heliophyte	Moist	Hillside	Tree (<10m)	5-10cm	106.1	Vegetative	Loamy	Brown	33.57	13.23	52.93	22.6	Botanical Garden	Botanical Garden	24.0715	97.8167	1120
B110	KB_RS01	Tracheophyta	Magnoliopsida	Proteales	Proteaceae	Heliciopsis	Heliciopsis henryi	Sunny	Skiophyte	Moist	Hillside	Tree (<10m)	5-10cm	181.9	Vegetative	Loamy	Brown	32.33	12.87	51.57	18.6	Botanical Garden	Botanical Garden	24.0697	97.8177	1113
B110	KB_RS03	Tracheophyta	Magnoliopsida	Proteales	Proteaceae	Heliciopsis	Heliciopsis henryi	Sunny	Skiophyte	Moist	Hillside	Tree (<10m)	5-10cm	111.3	Vegetative	Loamy	Brown	32.33	12.87	51.57	18.6	Botanical Garden	Botanical Garden	24.0697	97.8177	1113
B110	KB_RS04	Tracheophyta	Magnoliopsida	Proteales	Proteaceae	Heliciopsis	Heliciopsis henryi	Sunny	Skiophyte	Moist	Hillside	Tree (<10m)	5-10cm	118.2	Vegetative	Loamy	Brown	32.33	12.87	51.57	18.6	Botanical Garden	Botanical Garden	24.0697	97.8177	1113
T048	XA_RS20	Tracheophyta	Magnoliopsida	Proteales	Proteaceae	Macadamia	Macadamia integrifolia	Sunny	Heliophyte	Moist	Nursery	Tree (<10m)	5-10cm	103.6	Vegetative	Loamy	Brown	27.17	11.23	44.93	29.06	Wanding Town	Huihuan Village	24.1194	98.0467	739
T048	XA_RS23	Tracheophyta	Magnoliopsida	Proteales	Proteaceae	Macadamia	Macadamia integrifolia	Sunny	Heliophyte	Moist	Nursery	Tree (<10m)	5-10cm	137.1	Vegetative	Loamy	Brown	27.17	11.23	44.93	29.06	Wanding Town	Huihuan Village	24.1194	98.0467	739
T048	XA_RS24	Tracheophyta	Magnoliopsida	Proteales	Proteaceae	Macadamia	Macadamia integrifolia	Sunny	Heliophyte	Moist	Nursery	Tree (<10m)	5-10cm	54.7	Vegetative	Loamy	Brown	27.17	11.23	44.93	29.06	Wanding Town	Huihuan Village	24.1194	98.0467	739
T380	LE_RS04	Tracheophyta	Magnoliopsida	Proteales	Proteaceae	Macadamia	Macadamia integrifolia	Sunny	Heliophyte	Moist	Park	Tree (<10m)	5-10cm	99.9	Vegetative	Loamy	Red	23.3	10	40	30.16	City Park	Longmo Lake	24.0032	97.8433	730
T380	LE_RS05	Tracheophyta	Magnoliopsida	Proteales	Proteaceae	Macadamia	Macadamia integrifolia	Sunny	Heliophyte	Moist	Park	Tree (<10m)	5-10cm	99.7	Vegetative	Loamy	Red	23.3	10	40	30.16	City Park	Longmo Lake	24.0032	97.8433	730
T380	LE_RS06	Tracheophyta	Magnoliopsida	Proteales	Proteaceae	Macadamia	Macadamia integrifolia	Sunny	Heliophyte	Moist	Park	Tree (<10m)	5-10cm	100.1	Vegetative	Loamy	Red	23.3	10	40	30.16	City Park	Longmo Lake	24.0032	97.8433	730
B086	XE_RS02	Tracheophyta	Magnoliopsida	Proteales	Sabiaceae	Meliosma	Meliosma cuneifolia	Sunny	Heliophyte	Moist	Hillside	Tree (>10m)	5-10cm	86.3	Vegetative	Loamy	Brown	28.47	11.67	46.67	22.25	Botanical Garden	Botanical Garden	24.0714	97.8178	1149
B086	XE_RS01	Tracheophyta	Magnoliopsida	Proteales	Sabiaceae	Meliosma	Meliosma cuneifolia	Sunny	Heliophyte	Moist	Hillside	Tree (>10m)	5-10cm	84	Vegetative	Loamy	Brown	28.47	11.67	46.67	22.25	Botanical Garden	Botanical Garden	24.0714	97.8178	1149
B086	XE_RS03	Tracheophyta	Magnoliopsida	Proteales	Sabiaceae	Meliosma	Meliosma cuneifolia	Sunny	Heliophyte	Moist	Hillside	Tree (>10m)	5-10cm	86.2	Vegetative	Loamy	Brown	28.47	11.67	46.67	22.25	Botanical Garden	Botanical Garden	24.0714	97.8178	1149
B121	XE_RS24	Tracheophyta	Magnoliopsida	Proteales	Sabiaceae	Meliosma	Meliosma simplicifolia	Sunny	Skiophyte	Moist	Hillside	Tree (>10m)	0-5cm	108.9	Vegetative	Loamy	Brown	34	13.4	53.6	17.37	Botanical Garden	Botanical Garden	24.0693	97.8184	1068
B121	XE_RS22	Tracheophyta	Magnoliopsida	Proteales	Sabiaceae	Meliosma	Meliosma simplicifolia	Sunny	Skiophyte	Moist	Hillside	Tree (>10m)	0-5cm	71.6	Vegetative	Loamy	Brown	34	13.4	53.6	17.37	Botanical Garden	Botanical Garden	24.0693	97.8184	1068
B121	XE_RS23	Tracheophyta	Magnoliopsida	Proteales	Sabiaceae	Meliosma	Meliosma simplicifolia	Sunny	Skiophyte	Moist	Hillside	Tree (>10m)	0-5cm	104.9	Vegetative	Loamy	Brown	34	13.4	53.6	17.37	Botanical Garden	Botanical Garden	24.0693	97.8184	1068
T152	FH_RS12	Tracheophyta	Magnoliopsida	Proteales	Sabiaceae	Meliosma	Meliosma simplicifolia	Sunny	Heliophyte	Moist	Park	Tree (<10m)	0-5cm	72.1	Vegetative	Loamy	Brown	26.2	10.93	43.73	29.02	City Park	Nanmao Lake	24.0109	97.8707	731
A037	FF_RS23	Tracheophyta	Magnoliopsida	Ranunculales	Berberidaceae	Berberis	Berberis atrocarpa	Sunny	Heliophyte	Moist	Hillside	Shrub (<2m)	5-10cm	110.8	Vegetative	Loamy	Brown	33.3	13.17	52.67	24.04	Botanical Garden	Botanical Garden	24.0696	97.8192	1116
B096	KB_RS23	Tracheophyta	Magnoliopsida	Ranunculales	Ranunculaceae	Clematis	Clematis florida	Sunny	Skiophyte	Moist	Hillside	Vine	10-15cm	196.6	Vegetative	Loamy	Brown	31.43	12.57	50.27	17.15	Botanical Garden	Botanical Garden	24.07	97.8176	1113
T081	HA_RS08	Tracheophyta	Magnoliopsida	Ranunculales	Ranunculaceae	Clematis	Clematis florida	Sunny	Skiophyte	Moist	Hillside	Vine	10-15cm	86.1	Vegetative	Loamy	Brown	30.3	12.23	48.93	27.29	Wanding Town	Huihuan River	24.1283	98.0506	773
T310	ZH_RS07	Tracheophyta	Magnoliopsida	Ranunculales	Berberidaceae	Dysosma	Dysosma versipellis	Sunny	Skiophyte	Moist	Reserve	Herb	5-10cm	122.8	Vegetative	Loamy	Brown	28.17	11.57	46.27	20.52	Moli Rainforest	Moli Rainforest	24.1156	97.9805	833
C080	XH_RS22	Tracheophyta	Magnoliopsida	Ranunculales	Menispermaceae	Pericampylus	Pericampylus glaucus	Sunny	Skiophyte	Moist	Reserve	Vine	0-5cm	52.1	Vegetative	Loamy	Brown	29.77	12.07	48.27	19.33	Moli Rainforest	Moli Rainforest	24.1143	97.9825	900
C080	XH_RS23	Tracheophyta	Magnoliopsida	Ranunculales	Menispermaceae	Pericampylus	Pericampylus glaucus	Sunny	Skiophyte	Moist	Reserve	Vine	0-5cm	45.5	Vegetative	Loamy	Brown	29.77	12.07	48.27	19.33	Moli Rainforest	Moli Rainforest	24.1143	97.9825	900
C080	XH_RS21	Tracheophyta	Magnoliopsida	Ranunculales	Menispermaceae	Pericampylus	Pericampylus glaucus	Sunny	Skiophyte	Moist	Reserve	Vine	0-5cm	44.6	Vegetative	Loamy	Brown	29.77	12.07	48.27	19.33	Moli Rainforest	Moli Rainforest	24.1143	97.9825	900
E002	XC_RS12	Tracheophyta	Magnoliopsida	Ranunculales	Ranunculaceae	Ranunculus	Ranunculus chinensis	Shower	Skiophyte	Moist	Hillside	Herb	0-5cm	22.8	Vegetative	Loamy	Brown	34.03	13.43	53.67	18.5	Botanical Garden	Botanical Garden	24.0706	97.8201	1076
F099	LH_RS16	Tracheophyta	Magnoliopsida	Ranunculales	Menispermaceae	Stephania	Stephania epigaea	Sunny	Skiophyte	Dry	Hillside	Vine	0-5cm	72	Vegetative	Loamy	Red	23.67	10.1	40.4	25.04	Wanding Town	Wanding Forest Park	24.0872	98.0739	893
F099	LH_RS17	Tracheophyta	Magnoliopsida	Ranunculales	Menispermaceae	Stephania	Stephania epigaea	Sunny	Skiophyte	Dry	Hillside	Vine	0-5cm	87.6	Vegetative	Loamy	Red	23.67	10.1	40.4	25.04	Wanding Town	Wanding Forest Park	24.0872	98.0739	893
F099	LH_RS18	Tracheophyta	Magnoliopsida	Ranunculales	Menispermaceae	Stephania	Stephania epigaea	Sunny	Skiophyte	Dry	Hillside	Vine	0-5cm	50	Vegetative	Loamy	Red	23.67	10.1	40.4	25.04	Wanding Town	Wanding Forest Park	24.0872	98.0739	893
T036	LQ_RS04	Tracheophyta	Magnoliopsida	Ranunculales	Menispermaceae	Stephania	Stephania epigaea	Sunny	Skiophyte	Moist	Hillside	Vine	5-10cm	99.2	Vegetative	Loamy	Brown	23.03	9.93	39.73	22.79	Botanical Garden	Botanical Garden	24.0703	97.8182	1117
E031	KA_RS11	Tracheophyta	Magnoliopsida	Ranunculales	Menispermaceae	Stephania	Stephania japonica	Shower	Skiophyte	Moist	Hillside	Vine	0-5cm	102.4	Vegetative	Loamy	Brown	35.57	13.93	55.73	18.95	Botanical Garden	Botanical Garden	24.0709	97.8195	1083
C046	FD_RS11	Tracheophyta	Magnoliopsida	Rosales	Cannabaceae	Aphananthe	Aphananthe aspera	Sunny	Heliophyte	Moist	Reserve	Tree (>10m)	0-5cm	118.6	Vegetative	Loamy	Brown					Moli Rainforest	Moli Rainforest	24.1051	97.9809	842
C046	FD_RS10	Tracheophyta	Magnoliopsida	Rosales	Cannabaceae	Aphananthe	Aphananthe aspera	Sunny	Heliophyte	Moist	Reserve	Tree (>10m)	0-5cm	103.4	Vegetative	Loamy	Brown					Moli Rainforest	Moli Rainforest	24.1051	97.9809	842
C046	FD_RS09	Tracheophyta	Magnoliopsida	Rosales	Cannabaceae	Aphananthe	Aphananthe aspera	Sunny	Heliophyte	Moist	Reserve	Tree (>10m)	0-5cm	97.2	Vegetative	Loamy	Brown					Moli Rainforest	Moli Rainforest	24.1051	97.9809	842
B124	XF_RS20	Tracheophyta	Magnoliopsida	Rosales	Moraceae	Artocarpus	Artocarpus chama	Sunny	Skiophyte	Moist	Hillside	Tree (<10m)	0-5cm	105.4	Vegetative	Loamy	Brown	33.73	13.33	53.33	17.43	Botanical Garden	Botanical Garden	24.0684	97.8192	1068
A017	XA_RS11	Tracheophyta	Magnoliopsida	Rosales	Moraceae	Artocarpus	Artocarpus heterophyllus	Sunny	Heliophyte	Moist	Hillside	Tree (>10m)	5-10cm	108.7	Vegetative	Loamy	Brown	35.8	14	56	24.54	Botanical Garden	Botanical Garden	24.0691	97.8202	1110
A017	XA_RS10	Tracheophyta	Magnoliopsida	Rosales	Moraceae	Artocarpus	Artocarpus heterophyllus	Sunny	Heliophyte	Moist	Hillside	Tree (>10m)	5-10cm	83.6	Vegetative	Loamy	Brown	35.8	14	56	24.54	Botanical Garden	Botanical Garden	24.0691	97.8202	1110
A017	XA_RS09	Tracheophyta	Magnoliopsida	Rosales	Moraceae	Artocarpus	Artocarpus heterophyllus	Sunny	Heliophyte	Moist	Hillside	Tree (>10m)	5-10cm	110	Vegetative	Loamy	Brown	35.8	14	56	24.54	Botanical Garden	Botanical Garden	24.0691	97.8202	1110
T163	LF_RS03	Tracheophyta	Magnoliopsida	Rosales	Moraceae	Artocarpus	Artocarpus heterophyllus	Sunny	Heliophyte	Dry	Park	Tree (<10m)	5-10cm	68.4	Fruiting	Loamy	Brown	29.7	12.03	48.13	21.87	City Park	Nanmao Lake	24.0117	97.8705	735
T163	KI_RS16	Tracheophyta	Magnoliopsida	Rosales	Moraceae	Artocarpus	Artocarpus heterophyllus	Sunny	Heliophyte	Dry	Park	Tree (<10m)	5-10cm	46.7	Fruiting	Loamy	Brown	29.7	12.03	48.13	21.87	City Park	Nanmao Lake	24.0117	97.8705	735
T163	LF_RS04	Tracheophyta	Magnoliopsida	Rosales	Moraceae	Artocarpus	Artocarpus heterophyllus	Sunny	Heliophyte	Dry	Park	Tree (<10m)	5-10cm	105.9	Fruiting	Loamy	Brown	29.7	12.03	48.13	21.87	City Park	Nanmao Lake	24.0117	97.8705	735
T136	FG_RS09	Tracheophyta	Magnoliopsida	Rosales	Moraceae	Artocarpus	Artocarpus lakoocha	Sunny	Heliophyte	Moist	Park	Tree (<10m)	5-10cm	13.6	Vegetative	Loamy	Brown					City Park	Nanmao Lake	24.0108	97.8711	724
T083	HA_RS11	Tracheophyta	Magnoliopsida	Rosales	Moraceae	Broussonetia	Broussonetia papyrifera	Sunny	Heliophyte	Moist	Hillside	Tree (<10m)	5-10cm	99.9	Vegetative	Loamy	Brown	35.33	13.83	55.33	28.66	Wanding Town	Huihuan River	24.1194	98.0417	851
T083	HA_RS10	Tracheophyta	Magnoliopsida	Rosales	Moraceae	Broussonetia	Broussonetia papyrifera	Sunny	Heliophyte	Moist	Hillside	Tree (<10m)	5-10cm	109.2	Vegetative	Loamy	Brown	35.33	13.83	55.33	28.66	Wanding Town	Huihuan River	24.1194	98.0417	851
C045	FD_RS08	Tracheophyta	Magnoliopsida	Rosales	Cannabaceae	Celtis	Celtis tetrandra	Sunny	Heliophyte	Moist	Reserve	Tree (>10m)	5-10cm	102.8	Vegetative	Loamy	Brown					Moli Rainforest	Moli Rainforest	24.1051	97.9809	842
B048	LU_RS11	Tracheophyta	Magnoliopsida	Rosales	Rhamnaceae	Colubrina	Colubrina asiatica	Sunny	Heliophyte	Moist	Hillside	Vine	5-10cm	119.1	Vegetative	Loamy	Brown					Botanical Garden	Botanical Garden	24.0704	97.8179	1125
C003	HF_RS05	Tracheophyta	Magnoliopsida	Rosales	Urticaceae	Debregeasia	Debregeasia orientalis	Sunny	Skiophyte	Moist	Reserve	Shrub (<2m)	0-5cm	64.8	Vegetative	Loamy	Brown	29.67	12.03	48.13	18.04	Moli Rainforest	Moli Rainforest	24.1078	97.9862	822
C003	HF_RS07	Tracheophyta	Magnoliopsida	Rosales	Urticaceae	Debregeasia	Debregeasia orientalis	Sunny	Skiophyte	Moist	Reserve	Shrub (<2m)	0-5cm	64.7	Vegetative	Loamy	Brown	29.67	12.03	48.13	18.04	Moli Rainforest	Moli Rainforest	24.1078	97.9862	822
C003	HF_RS06	Tracheophyta	Magnoliopsida	Rosales	Urticaceae	Debregeasia	Debregeasia orientalis	Sunny	Skiophyte	Moist	Reserve	Shrub (<2m)	0-5cm	70.4	Vegetative	Loamy	Brown	29.67	12.03	48.13	18.04	Moli Rainforest	Moli Rainforest	24.1078	97.9862	822
E023	KA_RS05	Tracheophyta	Magnoliopsida	Rosales	Urticaceae	Debregeasia	Debregeasia orientalis	Shower	Skiophyte	Moist	Hillside	Shrub (<2m)	0-5cm	103.3	Vegetative	Loamy	Brown	19.9	8.93	35.73	18.29	Botanical Garden	Botanical Garden	24.0707	97.8197	1080
T302	KE_RS11	Tracheophyta	Magnoliopsida	Rosales	Urticaceae	Debregeasia	Debregeasia orientalis	Sunny	Heliophyte	Moist	Reserve	Shrub (<2m)	5-10cm	59.4	Vegetative	Loamy	Brown					Moli Rainforest	Moli Rainforest	24.1156	97.9812	901
T309	ZH_RS20	Tracheophyta	Magnoliopsida	Rosales	Urticaceae	Dendrocnide	Dendrocnide urentissima	Sunny	Skiophyte	Moist	Reserve	Tree (<10m)	5-10cm	96.1	Vegetative	Loamy	Brown	25.7	10.8	43.2	19.43	Moli Rainforest	Moli Rainforest	24.1155	97.9806	833
E051	XD_RS08	Tracheophyta	Magnoliopsida	Rosales	Elaeagnaceae	Elaeagnus	Elaeagnus conferta	Shower	Skiophyte	Moist	Hillside	Shrub (>2m)	0-5cm	120.3	Vegetative	Loamy	Brown	31.7	12.63	50.53	14.56	Botanical Garden	Botanical Garden	24.0699	97.8191	1120
T117	KJ_RS09	Tracheophyta	Magnoliopsida	Rosales	Elaeagnaceae	Elaeagnus	Elaeagnus conferta	Sunny	Skiophyte	Moist	Park	Shrub (<2m)	5-10cm	159.6	Vegetative	Loamy	Brown	37.37	14.47	57.87	23	City Park	Nanmao Lake	24.0092	97.8695	733
T117	KJ_RS07	Tracheophyta	Magnoliopsida	Rosales	Elaeagnaceae	Elaeagnus	Elaeagnus conferta	Sunny	Skiophyte	Moist	Park	Shrub (<2m)	5-10cm	266.7	Vegetative	Loamy	Brown	37.37	14.47	57.87	23	City Park	Nanmao Lake	24.0092	97.8695	733
T117	KJ_RS08	Tracheophyta	Magnoliopsida	Rosales	Elaeagnaceae	Elaeagnus	Elaeagnus conferta	Sunny	Skiophyte	Moist	Park	Shrub (<2m)	5-10cm	92.5	Vegetative	Loamy	Brown	37.37	14.47	57.87	23	City Park	Nanmao Lake	24.0092	97.8695	733
T267	CC_RS24	Tracheophyta	Magnoliopsida	Rosales	Elaeagnaceae	Elaeagnus	Elaeagnus conferta	Sunny	Skiophyte	Moist	Reserve	Shrub (>2m)	5-10cm	115.3	Vegetative	Loamy	Brown	31.07	12.47	49.87	23.54	Moli Rainforest	Moli Rainforest	24.1107	97.986	843
E047	XC_RS08	Tracheophyta	Magnoliopsida	Rosales	Elaeagnaceae	Elaeagnus	Elaeagnus luxiensis	Shower	Skiophyte	Moist	Hillside	Shrub (>2m)	0-5cm	113.8	Vegetative	Loamy	Brown	33.57	13.3	53.07	14.66	Botanical Garden	Botanical Garden	24.0698	97.8193	1098
C052	FD_RS20	Tracheophyta	Magnoliopsida	Rosales	Urticaceae	Elatostema	Elatostema albopilosum	Sunny	Skiophyte	Moist	Reserve		0-5cm	123.6	Flowering	Loamy	Brown	34.1	13.43	53.73	18.41	Moli Rainforest	Moli Rainforest	24.1083	97.9867	842
C052	FD_RS19	Tracheophyta	Magnoliopsida	Rosales	Urticaceae	Elatostema	Elatostema albopilosum	Sunny	Skiophyte	Moist	Reserve		0-5cm	72.6	Flowering	Loamy	Brown	34.1	13.43	53.73	18.41	Moli Rainforest	Moli Rainforest	24.1083	97.9867	842
C052	FD_RS18	Tracheophyta	Magnoliopsida	Rosales	Urticaceae	Elatostema	Elatostema albopilosum	Sunny	Skiophyte	Moist	Reserve		0-5cm	114.5	Flowering	Loamy	Brown	34.1	13.43	53.73	18.41	Moli Rainforest	Moli Rainforest	24.1083	97.9867	842
B120	XE_RS20	Tracheophyta	Magnoliopsida	Rosales	Urticaceae	Elatostema	Elatostema involucratum	Sunny	Skiophyte	Moist	Hillside	Herb	0-5cm	102	Vegetative	Loamy	Brown	37.53	14.5	58	17.5	Botanical Garden	Botanical Garden	24.0694	97.8184	1073
B120	XE_RS21	Tracheophyta	Magnoliopsida	Rosales	Urticaceae	Elatostema	Elatostema involucratum	Sunny	Skiophyte	Moist	Hillside	Herb	0-5cm	99	Vegetative	Loamy	Brown	37.53	14.5	58	17.5	Botanical Garden	Botanical Garden	24.0694	97.8184	1073
B120	XE_RS19	Tracheophyta	Magnoliopsida	Rosales	Urticaceae	Elatostema	Elatostema involucratum	Sunny	Skiophyte	Moist	Hillside	Herb	0-5cm	97.9	Vegetative	Loamy	Brown	37.53	14.5	58	17.5	Botanical Garden	Botanical Garden	24.0694	97.8184	1073
C008	HF_RS12	Tracheophyta	Magnoliopsida	Rosales	Urticaceae	Elatostema	Elatostema involucratum	Sunny	Skiophyte	Moist	Reserve	Herb	0-5cm	87.3	Vegetative	Loamy	Brown	35.4	13.87	55.47	18.23	Moli Rainforest	Moli Rainforest	24.1074	97.9853	835
C008	HF_RS13	Tracheophyta	Magnoliopsida	Rosales	Urticaceae	Elatostema	Elatostema involucratum	Sunny	Skiophyte	Moist	Reserve	Herb	0-5cm	85.9	Vegetative	Loamy	Brown	35.4	13.87	55.47	18.23	Moli Rainforest	Moli Rainforest	24.1074	97.9853	835
C008	HF_RS14	Tracheophyta	Magnoliopsida	Rosales	Urticaceae	Elatostema	Elatostema involucratum	Sunny	Skiophyte	Moist	Reserve	Herb	0-5cm	87.2	Vegetative	Loamy	Brown	35.4	13.87	55.47	18.23	Moli Rainforest	Moli Rainforest	24.1074	97.9853	835
A005	LV_RS03	Tracheophyta	Magnoliopsida	Rosales	Moraceae	Ficus	Ficus altissima	Sunny	Heliophyte	Moist	Hillside	Tree (>10m)	0-5cm	99	Vegetative	Loamy	Brown	37.93	14.67	58.67	28.52	Wanding Town	Huihuan River	24.1284	98.0519	738
T266	CC_RS23	Tracheophyta	Magnoliopsida	Rosales	Moraceae	Ficus	Ficus altissima	Sunny	Heliophyte	Moist	Reserve	Tree (>10m)	0-5cm	114.2	Vegetative	Loamy	Brown	34.63	13.6	54.4	23.7	Moli Rainforest	Moli Rainforest	24.1106	97.9859	830
C050	LV_RS18	Tracheophyta	Magnoliopsida	Rosales	Moraceae	Ficus	Ficus auriculata	Sunny	Skiophyte	Moist	Reserve	Tree (<10m)	5-10cm	105.2	Fruiting	Loamy	Brown	38.27	14.2	60.03	18.79	Moli Rainforest	Moli Rainforest	24.105	97.9809	842
T156	FH_RS06	Tracheophyta	Magnoliopsida	Rosales	Moraceae	Ficus	Ficus auriculata	Sunny	Heliophyte	Moist	Park	Tree (<10m)	5-10cm	108.9	Fruiting	Loamy	Brown	23.27	10	40	28.93	City Park	Nanmao Lake	24.0109	97.8715	731
T156	FH_RS05	Tracheophyta	Magnoliopsida	Rosales	Moraceae	Ficus	Ficus auriculata	Sunny	Heliophyte	Moist	Park	Tree (<10m)	5-10cm	114.6	Fruiting	Loamy	Brown	23.27	10	40	28.93	City Park	Nanmao Lake	24.0109	97.8715	731
T156	FH_RS07	Tracheophyta	Magnoliopsida	Rosales	Moraceae	Ficus	Ficus auriculata	Sunny	Heliophyte	Moist	Park	Tree (<10m)	5-10cm	121.8	Fruiting	Loamy	Brown	23.27	10	40	28.93	City Park	Nanmao Lake	24.0109	97.8715	731
T278	CD_RS08	Tracheophyta	Magnoliopsida	Rosales	Moraceae	Ficus	Ficus auriculata	Sunny	Heliophyte	Moist	Reserve	Tree (>10m)	5-10cm	123.1	Vegetative	Loamy	Brown					Moli Rainforest	Moli Rainforest	24.1118	97.9847	840
T278	CD_RS06	Tracheophyta	Magnoliopsida	Rosales	Moraceae	Ficus	Ficus auriculata	Sunny	Heliophyte	Moist	Reserve	Tree (>10m)	5-10cm	99.8	Vegetative	Loamy	Brown					Moli Rainforest	Moli Rainforest	24.1118	97.9847	840
T278	CD_RS10	Tracheophyta	Magnoliopsida	Rosales	Moraceae	Ficus	Ficus auriculata	Sunny	Heliophyte	Moist	Reserve	Tree (>10m)	5-10cm	97.8	Vegetative	Loamy	Brown					Moli Rainforest	Moli Rainforest	24.1118	97.9847	840
T303	KE_RS20	Tracheophyta	Magnoliopsida	Rosales	Moraceae	Ficus	Ficus auriculata	Sunny	Skiophyte	Moist	Reserve	Tree (<10m)	5-10cm	131.7	Vegetative	Loamy	Brown					Moli Rainforest	Moli Rainforest	24.1157	97.9811	919
A057	FG_RS10	Tracheophyta	Magnoliopsida	Rosales	Moraceae	Ficus	Ficus benjamina	Sunny	Heliophyte	Moist	Hillside	Tree (>10m)	0-5cm	98.6	Vegetative	Loamy	Red	33.87	13.37	53.47	20.1	Botanical Garden	Botanical Garden	24.0693	97.8198	1111
T075	XB_RS14	Tracheophyta	Magnoliopsida	Rosales	Moraceae	Ficus	Ficus benjamina	Sunny	Heliophyte	Moist	Beach	Tree (>10m)	5-10cm	120.5	Fruiting	Loamy	Brown	37.37	14.47	57.87	27.89	Wanding Town	Huihuan Beach	24.129	98.0501	738
T360	ZB_RS16	Tracheophyta	Magnoliopsida	Rosales	Moraceae	Ficus	Ficus benjamina	Sunny	Heliophyte	Moist	Park	Tree (<10m)	5-10cm	110.1	Vegetative	Loamy	Brown	19.27	8.73	34.93	21.5	City Park	Longmo Lake	23.9989	97.84	730
A063	FG_RS20	Tracheophyta	Magnoliopsida	Rosales	Moraceae	Ficus	Ficus callosa	Sunny	Heliophyte	Moist	Hillside	Tree (>10m)	5-10cm	60.6	Vegetative	Loamy	Brown					Botanical Garden	Botanical Garden	24.0692	97.8209	1110
A063	FG_RS19	Tracheophyta	Magnoliopsida	Rosales	Moraceae	Ficus	Ficus callosa	Sunny	Heliophyte	Moist	Hillside	Tree (>10m)	5-10cm	96.9	Vegetative	Loamy	Brown					Botanical Garden	Botanical Garden	24.0692	97.8209	1110
T358	ZB_RS14	Tracheophyta	Magnoliopsida	Rosales	Moraceae	Ficus	Ficus callosa	Sunny	Heliophyte	Moist	Park	Tree (<10m)	0-5cm	64.3	Vegetative	Loamy	Brown	32.3	12.87	51.47	19.97	City Park	Longmo Lake	23.999	97.8402	730
T079	HA_RS06	Tracheophyta	Magnoliopsida	Rosales	Moraceae	Ficus	Ficus concinna	Sunny	Skiophyte	Moist	Hillside		0-5cm	100.2	Vegetative	Loamy	Brown	38.13	14.73	58.93	27.52	Wanding Town	Huihuan River	24.1282	98.0506	773
T190	FK_RS09	Tracheophyta	Magnoliopsida	Rosales	Moraceae	Ficus	Ficus cyrtophylla	Sunny	Heliophyte	Moist	Park	Tree (>10m)	0-5cm	121.1	Vegetative	Loamy	Red	33.27	13.2	52.8	23.33	City Park	Nanmao Lake	24.0119	97.869	726
T190	FK_RS08	Tracheophyta	Magnoliopsida	Rosales	Moraceae	Ficus	Ficus cyrtophylla	Sunny	Heliophyte	Moist	Park	Tree (>10m)	0-5cm	97.9	Vegetative	Loamy	Red	33.27	13.2	52.8	23.33	City Park	Nanmao Lake	24.0119	97.869	726
T190	FK_RS10	Tracheophyta	Magnoliopsida	Rosales	Moraceae	Ficus	Ficus cyrtophylla	Sunny	Heliophyte	Moist	Park	Tree (>10m)	0-5cm	108.8	Vegetative	Loamy	Red	33.27	13.2	52.8	23.33	City Park	Nanmao Lake	24.0119	97.869	726
T261	XI_RS01	Tracheophyta	Magnoliopsida	Rosales	Moraceae	Ficus	Ficus cyrtophylla	Sunny	Heliophyte	Moist	Reserve	Tree (>10m)		81	Fruiting	Loamy	Brown	32.13	12.83	51.33	23.2	Moli Rainforest	Moli Rainforest	24.1102	97.986	813
T197	XJ_RS11	Tracheophyta	Magnoliopsida	Rosales	Moraceae	Ficus	Ficus deltoidea	Shower	Skiophyte	Moist	Park	Shrub (<2m)	0-5cm	101.5	Vegetative	Loamy	Brown	35.3	13.83	55.33	26.35	City Park	Nanmao Lake	24.0114	97.8724	731
T197	XJ_RS10	Tracheophyta	Magnoliopsida	Rosales	Moraceae	Ficus	Ficus deltoidea	Shower	Skiophyte	Moist	Park	Shrub (<2m)	0-5cm	104.1	Vegetative	Loamy	Brown	35.3	13.83	55.33	26.35	City Park	Nanmao Lake	24.0114	97.8724	731
T197	XJ_RS12	Tracheophyta	Magnoliopsida	Rosales	Moraceae	Ficus	Ficus deltoidea	Shower	Skiophyte	Moist	Park	Shrub (<2m)	0-5cm	98.6	Vegetative	Loamy	Brown	35.3	13.83	55.33	26.35	City Park	Nanmao Lake	24.0114	97.8724	731
T221	KE_RS15	Tracheophyta	Magnoliopsida	Rosales	Moraceae	Ficus	Ficus elastica	Sunny	Heliophyte	Moist	Park	Tree (<10m)	5-10cm	107.9	Vegetative	Loamy	Brown	42.23	16	64	31.43	City Park	Nanmao Lake	24.0114	97.8725	730
A047	KI_RS21	Tracheophyta	Magnoliopsida	Rosales	Moraceae	Ficus	Ficus hirta	Sunny	Heliophyte	Moist	Hillside	Shrub (<2m)	5-10cm	98.3	Fruiting	Loamy	Brown	33.87	13.33	53.33	21.85	Botanical Garden	Botanical Garden	24.0713	97.8179	1133
B015	ZF_RS08	Tracheophyta	Magnoliopsida	Rosales	Moraceae	Ficus	Ficus hirta	Sunny	Skiophyte	Dry	Hillside	Shrub (<2m)	0-5cm	121.3	Vegetative	Loamy	Brown	24.77	10.5	42	17.45	Botanical Garden	Botanical Garden	24.0695	97.8199	1116
B038	HE_RS10	Tracheophyta	Magnoliopsida	Rosales	Moraceae	Ficus	Ficus hispida	Sunny	Skiophyte	Moist	Hillside	Tree (<10m)	0-5cm	85.1	Vegetative	Loamy	Brown	25.37	10.63	42.53	18.7	Botanical Garden	Botanical Garden	24.0694	97.8186	1113
B102	KB_RS16	Tracheophyta	Magnoliopsida	Rosales	Moraceae	Ficus	Ficus irisana	Sunny	Skiophyte	Moist	Hillside	Tree (<10m)	5-10cm	102	Fruiting	Loamy	Brown	31.9	12.73	50.93	17.7	Botanical Garden	Botanical Garden	24.0699	97.8177	1113
T191	FK_RS12	Tracheophyta	Magnoliopsida	Rosales	Moraceae	Ficus	Ficus maclellandii	Sunny	Heliophyte	Moist	Park	Tree (>10m)	0-5cm	97.5	Vegetative	Loamy	Brown	31.8	12.7	50.8	24.31	City Park	Nanmao Lake	24.0119	97.869	725
T191	FJ_RS01	Tracheophyta	Magnoliopsida	Rosales	Moraceae	Ficus	Ficus maclellandii	Sunny	Heliophyte	Moist	Park	Tree (>10m)	0-5cm	64.6	Vegetative	Loamy	Brown	31.8	12.7	50.8	24.31	City Park	Nanmao Lake	24.0119	97.869	725
T191	FK_RS11	Tracheophyta	Magnoliopsida	Rosales	Moraceae	Ficus	Ficus maclellandii	Sunny	Heliophyte	Moist	Park	Tree (>10m)	0-5cm	91.8	Vegetative	Loamy	Brown	31.8	12.7	50.8	24.31	City Park	Nanmao Lake	24.0119	97.869	725
T213	FJ_RS15	Tracheophyta	Magnoliopsida	Rosales	Moraceae	Ficus	Ficus maclellandii	Sunny	Heliophyte	Moist	Park	Tree (<10m)	5-10cm	101.9	Flowering	Loamy	Brown	22.6	9.77	39.07	26.66	City Park	Nanmao Lake	24.0113	97.8726	730
T213	FJ_RS13	Tracheophyta	Magnoliopsida	Rosales	Moraceae	Ficus	Ficus maclellandii	Sunny	Heliophyte	Moist	Park	Tree (<10m)	5-10cm	100.8	Flowering	Loamy	Brown	22.6	9.77	39.07	26.66	City Park	Nanmao Lake	24.0113	97.8726	730
T213	FJ_RS14	Tracheophyta	Magnoliopsida	Rosales	Moraceae	Ficus	Ficus maclellandii	Sunny	Heliophyte	Moist	Park	Tree (<10m)	5-10cm	92.2	Flowering	Loamy	Brown	22.6	9.77	39.07	26.66	City Park	Nanmao Lake	24.0113	97.8726	730
T353	LD_RS08	Tracheophyta	Magnoliopsida	Rosales	Moraceae	Ficus	Ficus maclellandii	Sunny	Heliophyte	Moist	Park	Tree (<10m)	0-5cm	80.8	Fruiting	Loamy	Brown	29.3	16.77	47.4	28	City Park	Longmo Lake	24.0028	97.8422	730
T420	ZA_RS15	Tracheophyta	Magnoliopsida	Rosales	Moraceae	Ficus	Ficus microcarpa	Sunny	Heliophyte	Moist	Park	Tree (<10m)	0-5cm	107.8	Vegetative	Loamy	Red	25.8	10.8	43.2	27.14	City Park	Longmo Lake	24.0012	97.8346	730
T420	ZA_RS16	Tracheophyta	Magnoliopsida	Rosales	Moraceae	Ficus	Ficus microcarpa	Sunny	Heliophyte	Moist	Park	Tree (<10m)	0-5cm	108.5	Vegetative	Loamy	Red	25.8	10.8	43.2	27.14	City Park	Longmo Lake	24.0012	97.8346	730
T420	ZA_RS17	Tracheophyta	Magnoliopsida	Rosales	Moraceae	Ficus	Ficus microcarpa	Sunny	Heliophyte	Moist	Park	Tree (<10m)	0-5cm	113.6	Vegetative	Loamy	Red	25.8	10.8	43.2	27.14	City Park	Longmo Lake	24.0012	97.8346	730
T148	KH_RS10	Tracheophyta	Magnoliopsida	Rosales	Moraceae	Ficus	Ficus racemosa	Sunny	Heliophyte	Dry	Park	Tree (<10m)	5-10cm	103.6	Vegetative	Loamy	Brown	21.2	9.37	37.47	22.6	City Park	Nanmao Lake	24.011	97.8707	724
T138	FG_RS06	Tracheophyta	Magnoliopsida	Rosales	Moraceae	Ficus	Ficus religiosa	Sunny	Heliophyte	Moist	Park	Tree (<10m)	0-5cm	101.7	Vegetative	Loamy	Brown	25.1	10.57	42.27	20.29	City Park	Nanmao Lake	24.0103	97.8727	730
T252	FK_RS13	Tracheophyta	Magnoliopsida	Rosales	Moraceae	Ficus	Ficus religiosa	Sunny	Heliophyte	Moist	Reserve	Tree (<10m)	0-5cm	63.7	Vegetative	Loamy	Brown	33.33	13.2	52.8	19.81	Moli Rainforest	Moli Rainforest	24.1088	97.9871	813
T109	LK_RS16	Tracheophyta	Magnoliopsida	Rosales	Moraceae	Ficus	Ficus rumphii	Sunny	Heliophyte	Moist	Park	Tree (>10m)	15-20cm	104.7	Vegetative	Loamy	Brown	31.1	12.47	49.87	18.91	City Park	Nanmao Lake	24.0092	97.8696	733
T393	ZD_RS16	Tracheophyta	Magnoliopsida	Rosales	Moraceae	Ficus	Ficus rumphii	Sunny	Heliophyte	Moist	Park	Tree (<10m)	0-5cm	57.9	Vegetative	Loamy	Red	36.9	14.33	57.33	16.7	City Park	Longmo Lake	24.0001	97.8423	730
T393	ZD_RS17	Tracheophyta	Magnoliopsida	Rosales	Moraceae	Ficus	Ficus rumphii	Sunny	Heliophyte	Moist	Park	Tree (<10m)	0-5cm	66.6	Vegetative	Loamy	Red	36.9	14.33	57.33	16.7	City Park	Longmo Lake	24.0001	97.8423	730
T393	ZD_RS18	Tracheophyta	Magnoliopsida	Rosales	Moraceae	Ficus	Ficus rumphii	Sunny	Heliophyte	Moist	Park	Tree (<10m)	0-5cm	67.1	Vegetative	Loamy	Red	36.9	14.33	57.33	16.7	City Park	Longmo Lake	24.0001	97.8423	730
T134	LG_RS15	Tracheophyta	Magnoliopsida	Rosales	Moraceae	Ficus	Ficus semicordata	Sunny	Heliophyte	Moist	Park	Tree (<10m)	5-10cm	102.3	Fruiting	Loamy	Brown	28.37	11.6	46.4	26.66	City Park	Nanmao Lake	24.0107	97.8726	724
C055	HF_RS19	Tracheophyta	Magnoliopsida	Rosales	Moraceae	Ficus	Ficus sp. ZZ-2022a	Sunny	Heliophyte	Moist	Reserve	Vine	0-5cm	87.4	Vegetative	Loamy	Brown	31.17	12.5	50.23	16.51	Moli Rainforest	Moli Rainforest	24.1158	97.9801	940
T287	ZH_RS21	Tracheophyta	Magnoliopsida	Rosales	Moraceae	Ficus	Ficus tinctoria	Sunny	Heliophyte	Moist	Reserve	Tree (<10m)	0-5cm	102.1	Vegetative	Loamy	Brown	32.23	12.87	51.47	21.2	Moli Rainforest	Moli Rainforest	24.1129	97.9842	860
T287	ZH_RS22	Tracheophyta	Magnoliopsida	Rosales	Moraceae	Ficus	Ficus tinctoria	Sunny	Heliophyte	Moist	Reserve	Tree (<10m)	0-5cm	95.6	Vegetative	Loamy	Brown	32.23	12.87	51.47	21.2	Moli Rainforest	Moli Rainforest	24.1129	97.9842	860
T287	ZH_RS23	Tracheophyta	Magnoliopsida	Rosales	Moraceae	Ficus	Ficus tinctoria	Sunny	Heliophyte	Moist	Reserve	Tree (<10m)	0-5cm	82.6	Vegetative	Loamy	Brown	32.23	12.87	51.47	21.2	Moli Rainforest	Moli Rainforest	24.1129	97.9842	860
T121	LI_RS15	Tracheophyta	Magnoliopsida	Rosales	Moraceae	Ficus	Ficus virens	Sunny	Heliophyte	Moist	Park	Tree (<10m)	5-10cm	103.3	Fruiting	Loamy	Yellow	25.77	10.8	43.2	26.58	City Park	Nanmao Lake	24.0088	97.8734	733
T121	LI_RS14	Tracheophyta	Magnoliopsida	Rosales	Moraceae	Ficus	Ficus virens	Sunny	Heliophyte	Moist	Park	Tree (<10m)	5-10cm	103.9	Fruiting	Loamy	Yellow	25.77	10.8	43.2	26.58	City Park	Nanmao Lake	24.0088	97.8734	733
T121	LI_RS13	Tracheophyta	Magnoliopsida	Rosales	Moraceae	Ficus	Ficus virens	Sunny	Heliophyte	Moist	Park	Tree (<10m)	5-10cm	102.5	Fruiting	Loamy	Yellow	25.77	10.8	43.2	26.58	City Park	Nanmao Lake	24.0088	97.8734	733
T328	LC_RS11	Tracheophyta	Magnoliopsida	Rosales	Moraceae	Ficus	Ficus virens	Sunny	Heliophyte	Moist	Park	Tree (<10m)	0-5cm	101.5	Fruiting	Loamy	Brown	28	11.5	46	19.12	City Park	Longmo Lake	24.0027	97.8433	730
T328	LC_RS12	Tracheophyta	Magnoliopsida	Rosales	Moraceae	Ficus	Ficus virens	Sunny	Heliophyte	Moist	Park	Tree (<10m)	0-5cm	105.6	Fruiting	Loamy	Brown	28	11.5	46	19.12	City Park	Longmo Lake	24.0027	97.8433	730
T328	LC_RS13	Tracheophyta	Magnoliopsida	Rosales	Moraceae	Ficus	Ficus virens	Sunny	Heliophyte	Moist	Park	Tree (<10m)	0-5cm	107.1	Fruiting	Loamy	Brown	28	11.5	46	19.12	City Park	Longmo Lake	24.0027	97.8433	730
C002	HF_RS02	Tracheophyta	Magnoliopsida	Rosales	Urticaceae	Girardinia	Girardinia diversifolia	Sunny	Skiophyte	Moist	Reserve	Herb	0-5cm	73.8	Vegetative	Loamy	Brown	30.2	12.2	48.8	18.18	Moli Rainforest	Moli Rainforest	24.1078	97.9862	822
C002	HF_RS04	Tracheophyta	Magnoliopsida	Rosales	Urticaceae	Girardinia	Girardinia diversifolia	Sunny	Skiophyte	Moist	Reserve	Herb	0-5cm	74.4	Vegetative	Loamy	Brown	30.2	12.2	48.8	18.18	Moli Rainforest	Moli Rainforest	24.1078	97.9862	822
C002	HF_RS03	Tracheophyta	Magnoliopsida	Rosales	Urticaceae	Girardinia	Girardinia diversifolia	Sunny	Skiophyte	Moist	Reserve	Herb	0-5cm	64.4	Vegetative	Loamy	Brown	30.2	12.2	48.8	18.18	Moli Rainforest	Moli Rainforest	24.1078	97.9862	822
T016	ZI_RS10	Tracheophyta	Magnoliopsida	Rosales	Urticaceae	Gonostegia	Gonostegia hirta	Sunny	Heliophyte	Moist	Hillside	Herb	10-15cm	109.2	Vegetative	Loamy	Brown	30.1	12.17	48.67	22.62	Botanical Garden	Botanical Garden	24.07	97.8182	1086
T016	ZI_RS11	Tracheophyta	Magnoliopsida	Rosales	Urticaceae	Gonostegia	Gonostegia hirta	Sunny	Heliophyte	Moist	Hillside	Herb	10-15cm	112.2	Vegetative	Loamy	Brown	30.1	12.17	48.67	22.62	Botanical Garden	Botanical Garden	24.07	97.8182	1086
T016	ZI_RS12	Tracheophyta	Magnoliopsida	Rosales	Urticaceae	Gonostegia	Gonostegia hirta	Sunny	Heliophyte	Moist	Hillside	Herb	10-15cm	116.3	Vegetative	Loamy	Brown	30.1	12.17	48.67	22.62	Botanical Garden	Botanical Garden	24.07	97.8182	1086
E017	KA_RS03	Tracheophyta	Magnoliopsida	Asterales	Asteraceae	Vernonia	Vernonia unassigned	Shower	Skiophyte	Moist	Hillside	Herb	0-5cm	101.6	Vegetative	Loamy	Brown	31.17	12.53	50.13	19.25	Botanical Garden	Botanical Garden	24.071	97.8196	1083
T243	CD_RS18	Tracheophyta	Magnoliopsida	Rosales	Rhamnaceae	Hovenia	Hovenia acerba	Sunny	Heliophyte	Moist	Park	Tree (<10m)	10-15cm	102.8	Vegetative	Loamy	Brown	30.57	12.33	49.33	22.47	City Park	Nanmao Lake	24.0087	97.8711	720
B112	KB_RS21	Tracheophyta	Magnoliopsida	Rosales	Moraceae	Maclura	Maclura tricuspidata	Sunny	Skiophyte	Moist	Hillside	Shrub (<2m)	0-5cm	112.5	Vegetative	Loamy	Brown	36.97	14.33	57.33	18.83	Botanical Garden	Botanical Garden	24.0693	97.8178	1117
C021	KG_RS13	Tracheophyta	Magnoliopsida	Rosales	Moraceae	Maclura	Maclura tricuspidata	Sunny	Skiophyte	Moist	Reserve	Shrub (<2m)	0-5cm	102.1	Vegetative	Loamy	Brown	39.5	15.17	60.67	19.68	Moli Rainforest	Moli Rainforest	24.1068	97.9843	836
T158	FH_RS02	Tracheophyta	Magnoliopsida	Rosales	Moraceae	Morus	Morus alba	Sunny	Heliophyte	Dry	Park	Tree (<10m)	5-10cm	96.5	Vegetative	Loamy	Brown	28.5	11.67	46.67	27.2	City Park	Nanmao Lake	24.0111	97.871	726
T158	FH_RS04	Tracheophyta	Magnoliopsida	Rosales	Moraceae	Morus	Morus alba	Sunny	Heliophyte	Dry	Park	Tree (<10m)	5-10cm	109.9	Vegetative	Loamy	Brown	28.5	11.67	46.67	27.2	City Park	Nanmao Lake	24.0111	97.871	726
T158	FH_RS01	Tracheophyta	Magnoliopsida	Rosales	Moraceae	Morus	Morus alba	Sunny	Heliophyte	Dry	Park	Tree (<10m)	5-10cm	100.9	Vegetative	Loamy	Brown	28.5	11.67	46.67	27.2	City Park	Nanmao Lake	24.0111	97.871	726
T332	LD_RS02	Tracheophyta	Magnoliopsida	Rosales	Moraceae	Morus	Morus alba	Sunny	Heliophyte	Moist	Park	Tree (<10m)	5-10cm	100.5	Vegetative	Loamy	Brown	21	9.3	37.2	20.12	City Park	Longmo Lake	24.0024	97.8429	730
T251	FK_RS03	Tracheophyta	Magnoliopsida	Rosales	Moraceae	Morus	Morus macroura	Sunny	Heliophyte	Moist	Reserve	Tree (>10m)	0-5cm	101.2	Vegetative	Loamy	Brown					Moli Rainforest	Moli Rainforest	24.1089	97.9871	813
T251	FK_RS05	Tracheophyta	Magnoliopsida	Rosales	Moraceae	Morus	Morus macroura	Sunny	Heliophyte	Moist	Reserve	Tree (>10m)	0-5cm	90.9	Vegetative	Loamy	Brown					Moli Rainforest	Moli Rainforest	24.1089	97.9871	813
T251	FK_RS02	Tracheophyta	Magnoliopsida	Rosales	Moraceae	Morus	Morus macroura	Sunny	Heliophyte	Moist	Reserve	Tree (>10m)	0-5cm	97.4	Vegetative	Loamy	Brown					Moli Rainforest	Moli Rainforest	24.1089	97.9871	813
B062	ZG_RS14	Tracheophyta	Magnoliopsida	Rosales	Urticaceae	Oreocnide	Oreocnide integrifolia	Sunny	Heliophyte	Moist	Hillside	Tree (<10m)	0-5cm	115.5	Vegetative	Loamy	Brown	28.9	11.8	47.2	18.14	Botanical Garden	Botanical Garden	24.071	97.817	1130
B062	ZG_RS12	Tracheophyta	Magnoliopsida	Rosales	Urticaceae	Oreocnide	Oreocnide integrifolia	Sunny	Heliophyte	Moist	Hillside	Tree (<10m)	0-5cm	117.8	Vegetative	Loamy	Brown	28.9	11.8	47.2	18.14	Botanical Garden	Botanical Garden	24.071	97.817	1130
B062	ZG_RS13	Tracheophyta	Magnoliopsida	Rosales	Urticaceae	Oreocnide	Oreocnide integrifolia	Sunny	Heliophyte	Moist	Hillside	Tree (<10m)	0-5cm	77.8	Vegetative	Loamy	Brown	28.9	11.8	47.2	18.14	Botanical Garden	Botanical Garden	24.071	97.817	1130
C038	FC_RS07	Tracheophyta	Magnoliopsida	Rosales	Urticaceae	Oreocnide	Oreocnide integrifolia	Sunny	Skiophyte	Moist	Reserve	Tree (<10m)	5-10cm	104.7	Vegetative	Loamy	Brown	35.47	13.87	55.47	20.26	Moli Rainforest	Moli Rainforest	24.1055	97.9814	840
B018	ZF_RS10	Tracheophyta	Magnoliopsida	Rosales	Rhamnaceae	Paliurus	Paliurus ramosissimus	Sunny	Skiophyte	Dry	Hillside	Shrub (>2m)	5-10cm	59.3	Vegetative	Loamy	Brown	27	11.17	44.67	22.39	Botanical Garden	Botanical Garden	24.0695	97.8198	1116
E003	XC_RS13	Tracheophyta	Magnoliopsida	Rosales	Rosaceae	Potentilla	Potentilla chinensis	Shower	Skiophyte	Moist	Hillside	Herb	0-5cm	94.3	Vegetative	Loamy	Brown	34.57	13.6	54.4	18.73	Botanical Garden	Botanical Garden	24.0706	97.8201	1076
C031	XG_RS10	Tracheophyta	Magnoliopsida	Rosales	Urticaceae	Pouzolzia	Pouzolzia sanguinea	Sunny	Skiophyte	Moist	Reserve	Shrub (>2m)	0-5cm	96.2	Fruiting	Loamy	Brown	29.07	11.87	47.47	22.37	Moli Rainforest	Moli Rainforest	24.1056	97.9823	838
C031	XG_RS11	Tracheophyta	Magnoliopsida	Rosales	Urticaceae	Pouzolzia	Pouzolzia sanguinea	Sunny	Skiophyte	Moist	Reserve	Shrub (>2m)	0-5cm	64.2	Fruiting	Loamy	Brown	29.07	11.87	47.47	22.37	Moli Rainforest	Moli Rainforest	24.1056	97.9823	838
C031	XG_RS12	Tracheophyta	Magnoliopsida	Rosales	Urticaceae	Pouzolzia	Pouzolzia sanguinea	Sunny	Skiophyte	Moist	Reserve	Shrub (>2m)	0-5cm	87.2	Fruiting	Loamy	Brown	29.07	11.87	47.47	22.37	Moli Rainforest	Moli Rainforest	24.1056	97.9823	838
T211	FJ_RS17	Tracheophyta	Magnoliopsida	Rosales	Rosaceae	Prunus	Prunus cerasifera	Sunny	Heliophyte	Moist	Park	Tree (<10m)	5-10cm	102.2	Vegetative	Loamy	Brown	26.97	11.2	44.8	23.35	City Park	Nanmao Lake	24.0112	97.8726	730
T211	FJ_RS20	Tracheophyta	Magnoliopsida	Rosales	Rosaceae	Prunus	Prunus cerasifera	Sunny	Heliophyte	Moist	Park	Tree (<10m)	5-10cm	100.1	Vegetative	Loamy	Brown	26.97	11.2	44.8	23.35	City Park	Nanmao Lake	24.0112	97.8726	730
T211	FJ_RS21	Tracheophyta	Magnoliopsida	Rosales	Rosaceae	Prunus	Prunus cerasifera	Sunny	Heliophyte	Moist	Park	Tree (<10m)	5-10cm	100.3	Vegetative	Loamy	Brown	26.97	11.2	44.8	23.35	City Park	Nanmao Lake	24.0112	97.8726	730
T192	FJ_RS03	Tracheophyta	Magnoliopsida	Rosales	Rosaceae	Prunus	Prunus cerasoides	Sunny	Skiophyte	Moist	Park	Tree (<10m)	0-5cm	111.7	Vegetative	Loamy	Brown	29.27	11.9	47.6	25.35	City Park	Nanmao Lake	24.0118	97.8689	725
T192	FJ_RS06	Tracheophyta	Magnoliopsida	Rosales	Rosaceae	Prunus	Prunus cerasoides	Sunny	Skiophyte	Moist	Park	Tree (<10m)	0-5cm	98.4	Vegetative	Loamy	Brown	29.27	11.9	47.6	25.35	City Park	Nanmao Lake	24.0118	97.8689	725
T192	FJ_RS07	Tracheophyta	Magnoliopsida	Rosales	Rosaceae	Prunus	Prunus cerasoides	Sunny	Skiophyte	Moist	Park	Tree (<10m)	0-5cm	98.2	Vegetative	Loamy	Brown	29.27	11.9	47.6	25.35	City Park	Nanmao Lake	24.0118	97.8689	725
B139	ZG_RS15	Tracheophyta	Magnoliopsida	Rosales	Rosaceae	Prunus	Prunus domestica	Sunny	Skiophyte	Moist	Hillside	Tree (<10m)	0-5cm	119.1	Vegetative	Loamy	Brown	31.97	12.77	51.07	26.25	Botanical Garden	Botanical Garden	24.0686	97.8209	1072
T227	FB_RS05	Tracheophyta	Magnoliopsida	Rosales	Rosaceae	Prunus	Prunus padus	Sunny	Heliophyte	Moist	Park	Tree (<10m)	5-10cm	114.9	Vegetative	Loamy	Brown	28.8	11.77	47.07	29.75	City Park	Nanmao Lake	24.0116	97.8715	730
T227	FB_RS04	Tracheophyta	Magnoliopsida	Rosales	Rosaceae	Prunus	Prunus padus	Sunny	Heliophyte	Moist	Park	Tree (<10m)	5-10cm	103.8	Vegetative	Loamy	Brown	28.8	11.77	47.07	29.75	City Park	Nanmao Lake	24.0116	97.8715	730
T227	FB_RS06	Tracheophyta	Magnoliopsida	Rosales	Rosaceae	Prunus	Prunus padus	Sunny	Heliophyte	Moist	Park	Tree (<10m)	5-10cm	103.8	Vegetative	Loamy	Brown	28.8	11.77	47.07	29.75	City Park	Nanmao Lake	24.0116	97.8715	730
T337	ZB_RS05	Tracheophyta	Magnoliopsida	Rosales	Rosaceae	Prunus	Prunus persica	Sunny	Heliophyte	Moist	Park	Tree (<10m)	5-10cm	123.5	Flowering	Loamy	Red	12.47	6.57	26.27	24.19	City Park	Longmo Lake	24.0023	97.8427	730
T154	FH_RS08	Tracheophyta	Magnoliopsida	Rosales	Rosaceae	Prunus	Prunus salicina	Sunny	Heliophyte	Moist	Park	Tree (<10m)	5-10cm	45.7	Vegetative	Loamy	Brown	15.57	7.57	30.27	29.14	City Park	Nanmao Lake	24.0107	97.8717	731
B094	XE_RS16	Tracheophyta	Magnoliopsida	Rosales	Moraceae	Pseudostreblus	Pseudostreblus indicus	Sunny	Heliophyte	Moist	Hillside	Tree (>10m)	0-5cm	98.9	Vegetative	Loamy	Brown	36.33	14.13	56.53	21.91	Botanical Garden	Botanical Garden	24.071	97.818	1132
B094	XE_RS18	Tracheophyta	Magnoliopsida	Rosales	Moraceae	Pseudostreblus	Pseudostreblus indicus	Sunny	Heliophyte	Moist	Hillside	Tree (>10m)	0-5cm	103.2	Vegetative	Loamy	Brown	36.33	14.13	56.53	21.91	Botanical Garden	Botanical Garden	24.071	97.818	1132
B094	XE_RS17	Tracheophyta	Magnoliopsida	Rosales	Moraceae	Pseudostreblus	Pseudostreblus indicus	Sunny	Heliophyte	Moist	Hillside	Tree (>10m)	0-5cm	100	Vegetative	Loamy	Brown	36.33	14.13	56.53	21.91	Botanical Garden	Botanical Garden	24.071	97.818	1132
T111	KJ_RS10	Tracheophyta	Magnoliopsida	Rosales	Rosaceae	Rhaphiolepis	Rhaphiolepis loquata	Sunny	Heliophyte	Moist	Park	Tree (<10m)	0-5cm	134.6	Vegetative	Loamy	Brown	25.73	10.77	43.07	20.5	City Park	Nanmao Lake	24.0094	97.8701	733
T384	LE_RS14	Tracheophyta	Magnoliopsida	Rosales	Rosaceae	Rhaphiolepis	Rhaphiolepis loquata	Sunny	Heliophyte	Moist	Park	Tree (<10m)	5-10cm	104.5	Flowering	Loamy	Red	30.23	12.23	48.93	28.56	City Park	Longmo Lake	24.0024	97.8436	730
T384	LE_RS16	Tracheophyta	Magnoliopsida	Rosales	Rosaceae	Rhaphiolepis	Rhaphiolepis loquata	Sunny	Heliophyte	Moist	Park	Tree (<10m)	5-10cm	103.2	Flowering	Loamy	Red	30.23	12.23	48.93	28.56	City Park	Longmo Lake	24.0024	97.8436	730
T384	LE_RS15	Tracheophyta	Magnoliopsida	Rosales	Rosaceae	Rhaphiolepis	Rhaphiolepis loquata	Sunny	Heliophyte	Moist	Park	Tree (<10m)	5-10cm	107.3	Flowering	Loamy	Red	30.23	12.23	48.93	28.56	City Park	Longmo Lake	24.0024	97.8436	730
C036	FC_RS04	Tracheophyta	Magnoliopsida	Rosales	Rosaceae	Rubus	Rubus ellipticus	Sunny	Heliophyte	Moist	Reserve	Shrub (<2m)	0-5cm	104.6	Vegetative	Loamy	Brown	28.5	11.67	46.67	20.43	Moli Rainforest	Moli Rainforest	24.1056	97.9816	840
C091	HF_RS20	Tracheophyta	Magnoliopsida	Rosales	Rosaceae	Rubus	Rubus pirifolius	Sunny	Skiophyte	Moist	Reserve	Tree (<10m)	0-5cm	59	Vegetative	Loamy	Brown	20.43	9.1	36.4	17.37	Moli Rainforest	Moli Rainforest	24.1115	97.985	844
B084	XF_RS18	Tracheophyta	Magnoliopsida	Rosales	Rosaceae	Rubus	Rubus pluribracteatus	Sunny	Skiophyte	Moist	Hillside	Shrub (<2m)	5-10cm	102.6	Vegetative	Loamy	Brown	30	12.13	48.53	21.81	Botanical Garden	Botanical Garden	24.0714	97.8177	1149
B019	ZF_RS11	Tracheophyta	Magnoliopsida	Rosales	Moraceae	Streblus	Streblus ilicifolius	Sunny	Skiophyte	Dry	Hillside	Shrub (>2m)	0-5cm	75.5	Vegetative	Loamy	Brown	32.97	13.07	52.27	17.5	Botanical Garden	Botanical Garden	24.0694	97.8198	1116
B019	ZF_RS12	Tracheophyta	Magnoliopsida	Rosales	Moraceae	Streblus	Streblus ilicifolius	Sunny	Skiophyte	Dry	Hillside	Shrub (>2m)	0-5cm	101.1	Vegetative	Loamy	Brown	32.97	13.07	52.27	17.5	Botanical Garden	Botanical Garden	24.0694	97.8198	1116
B019	ZF_RS13	Tracheophyta	Magnoliopsida	Rosales	Moraceae	Streblus	Streblus ilicifolius	Sunny	Skiophyte	Dry	Hillside	Shrub (>2m)	0-5cm	110.9	Vegetative	Loamy	Brown	32.97	13.07	52.27	17.5	Botanical Garden	Botanical Garden	24.0694	97.8198	1116
B037	HE_RS13	Tracheophyta	Magnoliopsida	Rosales	Cannabaceae	Trema	Trema tomentosa	Sunny	Skiophyte	Moist	Hillside	Shrub (<2m)	5-10cm	87.6	Vegetative	Loamy	Brown	16	7.7	30.8	18.35	Botanical Garden	Botanical Garden	24.0695	97.8186	1113
T413	LA_RS19	Tracheophyta	Magnoliopsida	Rosales	Ulmaceae	Ulmus	Ulmus parvifolia	Sunny	Heliophyte	Moist	Park	Tree (<10m)	0-5cm	107.5	Fruiting	Loamy	Brown	41.93	15.93	63.73	26.29	City Park	Longmo Lake	24.0008	97.8346	730
T413	LA_RS18	Tracheophyta	Magnoliopsida	Rosales	Ulmaceae	Ulmus	Ulmus parvifolia	Sunny	Heliophyte	Moist	Park	Tree (<10m)	0-5cm	99.3	Fruiting	Loamy	Brown	41.93	15.93	63.73	26.29	City Park	Longmo Lake	24.0008	97.8346	730
T413	LA_RS20	Tracheophyta	Magnoliopsida	Rosales	Ulmaceae	Ulmus	Ulmus parvifolia	Sunny	Heliophyte	Moist	Park	Tree (<10m)	0-5cm	104.6	Fruiting	Loamy	Brown	41.93	15.93	63.73	26.29	City Park	Longmo Lake	24.0008	97.8346	730
C013	KG_RS06	Tracheophyta	Magnoliopsida	Rosales	Urticaceae	Urtica	Urtica fissa	Sunny	Skiophyte	Moist	Reserve	Herb	0-5cm	91.8	Vegetative	Loamy	Brown	31.7	12.67	50.67	17.58	Moli Rainforest	Moli Rainforest	24.1072	97.9849	835
C013	KG_RS05	Tracheophyta	Magnoliopsida	Rosales	Urticaceae	Urtica	Urtica fissa	Sunny	Skiophyte	Moist	Reserve	Herb	0-5cm	100.5	Vegetative	Loamy	Brown	31.7	12.67	50.67	17.58	Moli Rainforest	Moli Rainforest	24.1072	97.9849	835
C013	KG_RS04	Tracheophyta	Magnoliopsida	Rosales	Urticaceae	Urtica	Urtica fissa	Sunny	Skiophyte	Moist	Reserve	Herb	0-5cm	127.2	Vegetative	Loamy	Brown	31.7	12.67	50.67	17.58	Moli Rainforest	Moli Rainforest	24.1072	97.9849	835
C033	FC_RS06	Tracheophyta	Magnoliopsida	Rosales	Rhamnaceae	Ziziphus	Ziziphus cf. fungii MR-2013	Sunny	Skiophyte	Moist	Reserve		0-5cm	65.1	Vegetative	Loamy	Brown	29.57	12	48	21.16	Moli Rainforest	Moli Rainforest	24.1056	97.982	840
T218	XI_RS24	Tracheophyta	Magnoliopsida	Rosales	Rhamnaceae	Ziziphus	Ziziphus mauritiana	Sunny	Heliophyte	Moist	Park	Tree (<10m)	0-5cm	106.1	Vegetative	Loamy	Brown	29.1	11.8	47.2	26	City Park	Nanmao Lake	24.0113	97.8725	730
T366	LC_RS19	Tracheophyta	Magnoliopsida	Rosales	Rhamnaceae	Ziziphus	Ziziphus mauritiana	Sunny	Heliophyte	Dry	Park	Tree (<10m)	5-10cm	108.5	Fruiting	Loamy	Brown	26.1	10.9	43.6	20.81	City Park	Longmo Lake	23.9989	97.8397	730
B042	HE_RS14	Tracheophyta	Magnoliopsida	Sapindales	Sapindaceae	Aesculus	Aesculus wangii	Sunny	Heliophyte	Moist	Hillside	Tree (<10m)	15-20cm	92.3	Vegetative	Loamy	Brown	18.43	8.43	33.73	18.18	Botanical Garden	Botanical Garden	24.0694	97.8183	1122
T125	LI_RS23	Tracheophyta	Magnoliopsida	Sapindales	Sapindaceae	Aesculus	Aesculus wangii	Sunny	Heliophyte	Moist	Park	Tree (<10m)	5-10cm	96.2	Vegetative	Loamy	Brown	16.43	7.83	31.33	27.39	City Park	Nanmao Lake	24.0098	97.8736	724
T299	CB_RS14	Tracheophyta	Magnoliopsida	Sapindales	Sapindaceae	Aesculus	Aesculus wangii	Sunny	Heliophyte	Moist	Reserve	Tree (>10m)	5-10cm	81.2	Vegetative	Loamy	Brown	28.33	11.63	46.53	26.92	Moli Rainforest	Moli Rainforest	24.1151	97.9821	894
C058	FE_RS22	Tracheophyta	Magnoliopsida	Sapindales	Meliaceae	Aglaia	Aglaia odorata	Sunny	Heliophyte	Moist	Reserve	Shrub (<2m)	0-5cm	99.5	Vegetative	Loamy	Brown					Moli Rainforest	Moli Rainforest	24.1156	97.9804	940
C058	FE_RS14	Tracheophyta	Magnoliopsida	Sapindales	Meliaceae	Aglaia	Aglaia odorata	Sunny	Heliophyte	Moist	Reserve	Shrub (<2m)	0-5cm	102.8	Vegetative	Loamy	Brown					Moli Rainforest	Moli Rainforest	24.1156	97.9804	940
C058	FD_RS06	Tracheophyta	Magnoliopsida	Sapindales	Meliaceae	Aglaia	Aglaia odorata	Sunny	Heliophyte	Moist	Reserve	Shrub (<2m)	0-5cm	95.3	Vegetative	Loamy	Brown					Moli Rainforest	Moli Rainforest	24.1156	97.9804	940
C089	FE_RS06	Tracheophyta	Magnoliopsida	Sapindales	Meliaceae	Aglaia	Aglaia spectabilis	Sunny	Skiophyte	Moist	Reserve	Tree (<10m)	0-5cm	77.5	Vegetative	Loamy	Brown	38.43	14.83	59.33	20.43	Moli Rainforest	Moli Rainforest	24.113	97.984	914
C089	FE_RS08	Tracheophyta	Magnoliopsida	Sapindales	Meliaceae	Aglaia	Aglaia spectabilis	Sunny	Skiophyte	Moist	Reserve	Tree (<10m)	0-5cm	96.9	Vegetative	Loamy	Brown	38.43	14.83	59.33	20.43	Moli Rainforest	Moli Rainforest	24.113	97.984	914
C089	FE_RS05	Tracheophyta	Magnoliopsida	Sapindales	Meliaceae	Aglaia	Aglaia spectabilis	Sunny	Skiophyte	Moist	Reserve	Tree (<10m)	0-5cm	92.7	Vegetative	Loamy	Brown	38.43	14.83	59.33	20.43	Moli Rainforest	Moli Rainforest	24.113	97.984	914
T285	FA_RS02	Tracheophyta	Magnoliopsida	Sapindales	Simaroubaceae	Ailanthus	Ailanthus fordii	Sunny	Heliophyte	Moist	Reserve	Tree (>10m)	0-5cm	117	Vegetative	Loamy	Brown	35.3	13.83	55.33	20.42	Moli Rainforest	Moli Rainforest	24.1127	97.9843	861
T285	CA_RS11	Tracheophyta	Magnoliopsida	Sapindales	Simaroubaceae	Ailanthus	Ailanthus fordii	Sunny	Heliophyte	Moist	Reserve	Tree (>10m)	0-5cm	99.9	Vegetative	Loamy	Brown	35.3	13.83	55.33	20.42	Moli Rainforest	Moli Rainforest	24.1127	97.9843	861
T285	FA_RS05	Tracheophyta	Magnoliopsida	Sapindales	Simaroubaceae	Ailanthus	Ailanthus fordii	Sunny	Heliophyte	Moist	Reserve	Tree (>10m)	0-5cm	110.9	Vegetative	Loamy	Brown	35.3	13.83	55.33	20.42	Moli Rainforest	Moli Rainforest	24.1127	97.9843	861
C016	KG_RS07	Tracheophyta	Magnoliopsida	Sapindales	Simaroubaceae	Ailanthus	Ailanthus triphysus	Sunny	Skiophyte	Moist	Reserve		5-10cm	136.3	Vegetative	Loamy	Brown	39.77	15.27	61.07	17.52	Moli Rainforest	Moli Rainforest	24.1072	97.9849	835
C078	XH_RS19	Tracheophyta	Magnoliopsida	Sapindales	Meliaceae	Aphanamixis	Aphanamixis polystachya	Sunny	Heliophyte	Moist	Reserve		5-10cm	24	Vegetative	Loamy	Brown	42.77	16.53	64.8	19.37	Moli Rainforest	Moli Rainforest	24.1148	97.9822	900
C078	XH_RS17	Tracheophyta	Magnoliopsida	Sapindales	Meliaceae	Aphanamixis	Aphanamixis polystachya	Sunny	Heliophyte	Moist	Reserve		5-10cm	23.7	Vegetative	Loamy	Brown	42.77	16.53	64.8	19.37	Moli Rainforest	Moli Rainforest	24.1148	97.9822	900
C078	XH_RS18	Tracheophyta	Magnoliopsida	Sapindales	Meliaceae	Aphanamixis	Aphanamixis polystachya	Sunny	Heliophyte	Moist	Reserve		5-10cm	28.6	Vegetative	Loamy	Brown	42.77	16.53	64.8	19.37	Moli Rainforest	Moli Rainforest	24.1148	97.9822	900
T284	FA_RS03	Tracheophyta	Magnoliopsida	Sapindales	Rutaceae	Atalantia	Atalantia buxifolia	Sunny	Heliophyte	Moist	Reserve	Tree (<10m)	5-10cm	99.4	Vegetative	Loamy	Brown	36.33	14.13	56.53	21.41	Moli Rainforest	Moli Rainforest	24.1125	97.9841	861
T284	FA_RS12	Tracheophyta	Magnoliopsida	Sapindales	Rutaceae	Atalantia	Atalantia buxifolia	Sunny	Heliophyte	Moist	Reserve	Tree (<10m)	5-10cm	109.8	Vegetative	Loamy	Brown	36.33	14.13	56.53	21.41	Moli Rainforest	Moli Rainforest	24.1125	97.9841	861
T284	FA_RS11	Tracheophyta	Magnoliopsida	Sapindales	Rutaceae	Atalantia	Atalantia buxifolia	Sunny	Heliophyte	Moist	Reserve	Tree (<10m)	5-10cm	102.5	Vegetative	Loamy	Brown	36.33	14.13	56.53	21.41	Moli Rainforest	Moli Rainforest	24.1125	97.9841	861
E078	XD_RS15	Tracheophyta	Magnoliopsida	Sapindales	Meliaceae	Chukrasia	Chukrasia tabularis	Shower	Skiophyte	Moist	Hillside	Tree (<10m)	0-5cm	98.2	Vegetative	Loamy	Brown	35.67	13.93	55.73	15.14	Botanical Garden	Botanical Garden	24.0705	97.8178	1111
T231	FB_RS17	Tracheophyta	Magnoliopsida	Sapindales	Meliaceae	Chukrasia	Chukrasia tabularis	Sunny	Heliophyte	Moist	Park	Tree (>10m)	0-5cm	115.1	Vegetative	Loamy	Brown	25.17	10.63	42.53	29.31	City Park	Nanmao Lake	24.0117	97.8714	730
T231	FC_RS13	Tracheophyta	Magnoliopsida	Sapindales	Meliaceae	Chukrasia	Chukrasia tabularis	Sunny	Heliophyte	Moist	Park	Tree (>10m)	0-5cm	106.2	Vegetative	Loamy	Brown	25.17	10.63	42.53	29.31	City Park	Nanmao Lake	24.0117	97.8714	730
T231	FC_RS23	Tracheophyta	Magnoliopsida	Sapindales	Meliaceae	Chukrasia	Chukrasia tabularis	Sunny	Heliophyte	Moist	Park	Tree (>10m)	0-5cm	118.9	Vegetative	Loamy	Brown	25.17	10.63	42.53	29.31	City Park	Nanmao Lake	24.0117	97.8714	730
E063	KA_RS16	Tracheophyta	Magnoliopsida	Sapindales	Meliaceae	Cipadessa	Cipadessa baccifera	Shower	Skiophyte	Moist	Hillside	Shrub (<2m)	0-5cm	105.5	Vegetative	Loamy	Brown	35.87	14	56	15.95	Botanical Garden	Botanical Garden	24.0702	97.8188	1122
T085	HA_RS13	Tracheophyta	Magnoliopsida	Sapindales	Rutaceae	Citrus	Citrus limon	Sunny	Skiophyte	Moist	Hillside	Tree (<10m)	10-15cm	85.1	Vegetative	Loamy	Brown	38.57	14.87	59.47	26.35	Wanding Town	Huihuan River	24.1203	98.0425	851
T245	CD_RS14	Tracheophyta	Magnoliopsida	Sapindales	Rutaceae	Citrus	Citrus maxima	Sunny	Heliophyte	Moist	Park	Tree (<10m)	5-10cm	116.9	Vegetative	Loamy	Brown	22.83	9.87	39.47	23.33	City Park	Nanmao Lake	24.0087	97.8713	720
T245	CD_RS13	Tracheophyta	Magnoliopsida	Sapindales	Rutaceae	Citrus	Citrus maxima	Sunny	Heliophyte	Moist	Park	Tree (<10m)	5-10cm	110.7	Vegetative	Loamy	Brown	22.83	9.87	39.47	23.33	City Park	Nanmao Lake	24.0087	97.8713	720
T245	CD_RS12	Tracheophyta	Magnoliopsida	Sapindales	Rutaceae	Citrus	Citrus maxima	Sunny	Heliophyte	Moist	Park	Tree (<10m)	5-10cm	95.7	Vegetative	Loamy	Brown	22.83	9.87	39.47	23.33	City Park	Nanmao Lake	24.0087	97.8713	720
T317	CB_RS03	Tracheophyta	Magnoliopsida	Sapindales	Rutaceae	Citrus	Citrus maxima	Sunny	Heliophyte	Moist	Reserve	Tree (<10m)	0-5cm	110.6	Fruiting	Loamy	Brown	33	13.07	52.27	23.68	Moli Rainforest	Moli Rainforest	24.1109	97.987	824
T053	LP_RS08	Tracheophyta	Magnoliopsida	Sapindales	Sapindaceae	Dimocarpus	Dimocarpus longan	Sunny	Heliophyte	Moist	Nursery	Tree (<10m)	5-10cm	82.1	Vegetative	Loamy	Brown	29.97	12.2	48.8	29	Wanding Town	Huihuan Village	24.1194	98.0467	739
T064	LV_RS12	Tracheophyta	Magnoliopsida	Sapindales	Sapindaceae	Dimocarpus	Dimocarpus longan	Sunny	Skiophyte	Moist	Hillside	Tree (<10m)	0-5cm	109.9	Vegetative	Loamy	Brown	39.87	15.3	61.2	28.54	Wanding Town	Huihuan River	24.1281	98.0521	738
T162	KI_RS15	Tracheophyta	Magnoliopsida	Sapindales	Sapindaceae	Dimocarpus	Dimocarpus longan	Sunny	Heliophyte	Dry	Park	Tree (<10m)	5-10cm	94.8	Vegetative	Loamy	Brown	36.17	14.1	56.4	27	City Park	Nanmao Lake	24.0112	97.8706	726
T162	KI_RS14	Tracheophyta	Magnoliopsida	Sapindales	Sapindaceae	Dimocarpus	Dimocarpus longan	Sunny	Heliophyte	Dry	Park	Tree (<10m)	5-10cm	116.6	Vegetative	Loamy	Brown	36.17	14.1	56.4	27	City Park	Nanmao Lake	24.0112	97.8706	726
T162	KI_RS13	Tracheophyta	Magnoliopsida	Sapindales	Sapindaceae	Dimocarpus	Dimocarpus longan	Sunny	Heliophyte	Dry	Park	Tree (<10m)	5-10cm	100.4	Vegetative	Loamy	Brown	36.17	14.1	56.4	27	City Park	Nanmao Lake	24.0112	97.8706	726
T304	ZH_RS11	Tracheophyta	Magnoliopsida	Sapindales	Meliaceae	Dysoxylum	Dysoxylum gotadhora	Sunny	Skiophyte	Moist	Reserve	Tree (<10m)	5-10cm	106	Vegetative	Loamy	Brown	13.3	33.73	53.2	21.06	Moli Rainforest	Moli Rainforest	24.1159	97.9802	932
T304	ZH_RS12	Tracheophyta	Magnoliopsida	Sapindales	Meliaceae	Dysoxylum	Dysoxylum gotadhora	Sunny	Skiophyte	Moist	Reserve	Tree (<10m)	5-10cm	112.1	Vegetative	Loamy	Brown	13.3	33.73	53.2	21.06	Moli Rainforest	Moli Rainforest	24.1159	97.9802	932
T304	ZH_RS13	Tracheophyta	Magnoliopsida	Sapindales	Meliaceae	Dysoxylum	Dysoxylum gotadhora	Sunny	Skiophyte	Moist	Reserve	Tree (<10m)	5-10cm	112.5	Vegetative	Loamy	Brown	13.3	33.73	53.2	21.06	Moli Rainforest	Moli Rainforest	24.1159	97.9802	932
F104	LH_RS22	Tracheophyta	Magnoliopsida	Sapindales	Rutaceae	Glycosmis	Glycosmis cochinchinensis	Sunny	Skiophyte	Moist	Hillside		5-10cm	66.3	Vegetative	Loamy	Red	31.67	12.67	50.67	24.27	Wanding Town	Wanding Forest Park	24.0878	98.0744	902
F104	LH_RS24	Tracheophyta	Magnoliopsida	Sapindales	Rutaceae	Glycosmis	Glycosmis cochinchinensis	Sunny	Skiophyte	Moist	Hillside		5-10cm	29.5	Vegetative	Loamy	Red	31.67	12.67	50.67	24.27	Wanding Town	Wanding Forest Park	24.0878	98.0744	902
F104	LH_RS23	Tracheophyta	Magnoliopsida	Sapindales	Rutaceae	Glycosmis	Glycosmis cochinchinensis	Sunny	Skiophyte	Moist	Hillside		5-10cm	37	Vegetative	Loamy	Red	31.67	12.67	50.67	24.27	Wanding Town	Wanding Forest Park	24.0878	98.0744	902
C069	XH_RS05	Tracheophyta	Magnoliopsida	Sapindales	Meliaceae	Heynea	Heynea trijuga	Sunny	Skiophyte	Moist	Reserve	Tree (<10m)	5-10cm	101.8	Vegetative	Loamy	Brown	31	12.47	49.87	17.5	Moli Rainforest	Moli Rainforest	24.1155	97.9814	906
T072	XB_RS07	Tracheophyta	Magnoliopsida	Sapindales	Meliaceae	Heynea	Heynea trijuga	Sunny	Skiophyte	Moist	Hillside	Tree (<10m)	5-10cm	50.7	Vegetative	Loamy	Brown	26.77	11.13	44.53	27.52	Wanding Town	Huihuan River	24.1284	98.0518	738
T072	XB_RS06	Tracheophyta	Magnoliopsida	Sapindales	Meliaceae	Heynea	Heynea trijuga	Sunny	Skiophyte	Moist	Hillside	Tree (<10m)	5-10cm	41.1	Vegetative	Loamy	Brown	26.77	11.13	44.53	27.52	Wanding Town	Huihuan River	24.1284	98.0518	738
T403	LD_RS18	Tracheophyta	Magnoliopsida	Sapindales	Meliaceae	Khaya	Khaya senegalensis	Sunny	Heliophyte	Dry	Park	Tree (<10m)	5-10cm	86.5	Vegetative	Loamy	Brown	25.93	10.83	43.33	18.43	City Park	Longmo Lake	24.0006	97.8349	730
T342	ZB_RS10	Tracheophyta	Magnoliopsida	Sapindales	Sapindaceae	Koelreuteria	Koelreuteria paniculata	Sunny	Heliophyte	Moist	Park	Tree (<10m)	5-10cm	35.6	Fruiting	Loamy	Red	20.67	9.17	36.67	27.18	City Park	Longmo Lake	24.0022	97.8423	730
T342	ZB_RS12	Tracheophyta	Magnoliopsida	Sapindales	Sapindaceae	Koelreuteria	Koelreuteria paniculata	Sunny	Heliophyte	Moist	Park	Tree (<10m)	5-10cm	41.7	Fruiting	Loamy	Red	20.67	9.17	36.67	27.18	City Park	Longmo Lake	24.0022	97.8423	730
T342	ZB_RS11	Tracheophyta	Magnoliopsida	Sapindales	Sapindaceae	Koelreuteria	Koelreuteria paniculata	Sunny	Heliophyte	Moist	Park	Tree (<10m)	5-10cm	59.6	Fruiting	Loamy	Red	20.67	9.17	36.67	27.18	City Park	Longmo Lake	24.0022	97.8423	730
T006	XB_RS15	Tracheophyta	Magnoliopsida	Sapindales	Sapindaceae	Lepisanthes	Lepisanthes browniana	Sunny	Heliophyte	Moist	Hillside	Tree (<10m)	5-10cm	115.3	Vegetative	Loamy	Brown	27.97	11.5	46	27.1	Botanical Garden	Botanical Garden	24.0692	97.8206	1110
T006	XB_RS16	Tracheophyta	Magnoliopsida	Sapindales	Sapindaceae	Lepisanthes	Lepisanthes browniana	Sunny	Heliophyte	Moist	Hillside	Tree (<10m)	5-10cm	96.7	Vegetative	Loamy	Brown	27.97	11.5	46	27.1	Botanical Garden	Botanical Garden	24.0692	97.8206	1110
F094	LH_RS12	Tracheophyta	Magnoliopsida	Sapindales	Anacardiaceae	Mangifera	Mangifera indica	Sunny	Heliophyte	Moist	Hillside	Tree (>10m)	10-15cm	104.3	Vegetative	Loamy	Red	31.9	12.73	50.67	25.93	Wanding Town	Wanding Forest Park	24.0906	98.0589	1046
F094	LH_RS11	Tracheophyta	Magnoliopsida	Sapindales	Anacardiaceae	Mangifera	Mangifera indica	Sunny	Heliophyte	Moist	Hillside	Tree (>10m)	10-15cm	111.3	Vegetative	Loamy	Red	31.9	12.73	50.67	25.93	Wanding Town	Wanding Forest Park	24.0906	98.0589	1046
F094	LH_RS13	Tracheophyta	Magnoliopsida	Sapindales	Anacardiaceae	Mangifera	Mangifera indica	Sunny	Heliophyte	Moist	Hillside	Tree (>10m)	10-15cm	101.1	Vegetative	Loamy	Red	31.9	12.73	50.67	25.93	Wanding Town	Wanding Forest Park	24.0906	98.0589	1046
T165	LH_RS02	Tracheophyta	Magnoliopsida	Sapindales	Anacardiaceae	Mangifera	Mangifera indica	Sunny	Heliophyte	Dry	Park	Tree (<10m)	5-10cm	100.9	Vegetative	Loamy	Brown	28.43	11.67	46.67	23.1	City Park	Nanmao Lake	24.0115	97.8707	723
T165	LF_RS05	Tracheophyta	Magnoliopsida	Sapindales	Anacardiaceae	Mangifera	Mangifera indica	Sunny	Heliophyte	Dry	Park	Tree (<10m)	5-10cm	106.7	Vegetative	Loamy	Brown	28.43	11.67	46.67	23.1	City Park	Nanmao Lake	24.0115	97.8707	723
T165	LH_RS01	Tracheophyta	Magnoliopsida	Sapindales	Anacardiaceae	Mangifera	Mangifera indica	Sunny	Heliophyte	Dry	Park	Tree (<10m)	5-10cm	101.2	Vegetative	Loamy	Brown	28.43	11.67	46.67	23.1	City Park	Nanmao Lake	24.0115	97.8707	723
C051	FD_RS24	Tracheophyta	Magnoliopsida	Sapindales	Meliaceae	Melia	Melia azedarach	Sunny	Skiophyte	Moist	Reserve	Tree (<10m)	0-5cm	127.8	Vegetative	Loamy	Brown	33.37	13.2	52.8	20.62	Moli Rainforest	Moli Rainforest	24.105	97.9808	842
C051	FD_RS22	Tracheophyta	Magnoliopsida	Sapindales	Meliaceae	Melia	Melia azedarach	Sunny	Skiophyte	Moist	Reserve	Tree (<10m)	0-5cm	110.6	Vegetative	Loamy	Brown	33.37	13.2	52.8	20.62	Moli Rainforest	Moli Rainforest	24.105	97.9808	842
C051	FD_RS21	Tracheophyta	Magnoliopsida	Sapindales	Meliaceae	Melia	Melia azedarach	Sunny	Skiophyte	Moist	Reserve	Tree (<10m)	0-5cm	97.8	Vegetative	Loamy	Brown	33.37	13.2	52.8	20.62	Moli Rainforest	Moli Rainforest	24.105	97.9808	842
B116	HC_RS21	Tracheophyta	Magnoliopsida	Sapindales	Meliaceae	Meliaceae unassigned	Meliaceae unassigned	Sunny	Skiophyte	Moist	Hillside		5-10cm	94.9	Vegetative	Loamy	Brown	33.97	13.4	53.6	19.63	Botanical Garden	Botanical Garden	24.0691	97.8185	1117
C065	XH_RS01	Tracheophyta	Magnoliopsida	Sapindales	Rutaceae	Murraya	Murraya exotica	Sunny	Heliophyte	Moist	Reserve	Tree (<10m)	5-10cm	102	Vegetative	Loamy	Brown	33.3	13.2	52.8	17.87	Moli Rainforest	Moli Rainforest	24.1158	97.9811	957
C065	XH_RS03	Tracheophyta	Magnoliopsida	Sapindales	Rutaceae	Murraya	Murraya exotica	Sunny	Heliophyte	Moist	Reserve	Tree (<10m)	5-10cm	70.2	Vegetative	Loamy	Brown	33.3	13.2	52.8	17.87	Moli Rainforest	Moli Rainforest	24.1158	97.9811	957
C065	XH_RS02	Tracheophyta	Magnoliopsida	Sapindales	Rutaceae	Murraya	Murraya exotica	Sunny	Heliophyte	Moist	Reserve	Tree (<10m)	5-10cm	108.4	Vegetative	Loamy	Brown	33.3	13.2	52.8	17.87	Moli Rainforest	Moli Rainforest	24.1158	97.9811	957
T101	ZE_RS14	Tracheophyta	Magnoliopsida	Sapindales	Rutaceae	Murraya	Murraya exotica	Sunny	Heliophyte	Moist	Park	Tree (<10m)	5-10cm	103.1	Fruiting	Loamy	Brown	42.13	16	64	23.56	City Park	Nanmao Lake	24.0094	97.8701	719
T101	LJ_RS16	Tracheophyta	Magnoliopsida	Sapindales	Rutaceae	Murraya	Murraya exotica	Sunny	Heliophyte	Moist	Park	Tree (<10m)	5-10cm	100.3	Fruiting	Loamy	Brown	42.13	16	64	23.56	City Park	Nanmao Lake	24.0094	97.8701	719
T101	LJ_RS22	Tracheophyta	Magnoliopsida	Sapindales	Rutaceae	Murraya	Murraya exotica	Sunny	Heliophyte	Moist	Park	Tree (<10m)	5-10cm	100.5	Fruiting	Loamy	Brown	42.13	16	64	23.56	City Park	Nanmao Lake	24.0094	97.8701	719
C068	XH_RS04	Tracheophyta	Magnoliopsida	Sapindales	Rutaceae	Murraya	Murraya tetramera	Sunny	Skiophyte	Moist	Reserve	Tree (<10m)	0-5cm	110.1	Vegetative	Loamy	Brown	34.87	13.7	54.8	16.87	Moli Rainforest	Moli Rainforest	24.1156	97.9813	906
B067	HD_RS09	Tracheophyta	Magnoliopsida	Sapindales	Anacardiaceae	Pegia	Pegia nitida	Sunny	Skiophyte	Moist	Hillside	Vine	5-10cm	118.9	Vegetative	Loamy	Brown	25.3	10.67	42.67	18.25	Botanical Garden	Botanical Garden	24.0718	97.8164	1137
B067	HD_RS10	Tracheophyta	Magnoliopsida	Sapindales	Anacardiaceae	Pegia	Pegia nitida	Sunny	Skiophyte	Moist	Hillside	Vine	5-10cm	102.3	Vegetative	Loamy	Brown	25.3	10.67	42.67	18.25	Botanical Garden	Botanical Garden	24.0718	97.8164	1137
B067	HD_RS08	Tracheophyta	Magnoliopsida	Sapindales	Anacardiaceae	Pegia	Pegia nitida	Sunny	Skiophyte	Moist	Hillside	Vine	5-10cm	101.5	Vegetative	Loamy	Brown	25.3	10.67	42.67	18.25	Botanical Garden	Botanical Garden	24.0718	97.8164	1137
T063	LV_RS11	Tracheophyta	Magnoliopsida	Sapindales	Anacardiaceae	Pegia	Pegia nitida	Sunny	Heliophyte	Moist	Hillside	Vine	5-10cm	88.6	Vegetative	Loamy	Brown	19.3	8.73	34.93	29.14	Wanding Town	Huihuan River	24.1278	98.052	738
T256	FI_RS12	Tracheophyta	Magnoliopsida	Sapindales	Simaroubaceae	Picrasma	Picrasma javanica	Sunny	Heliophyte	Moist	Reserve	Tree (>10m)	5-10cm	82.2	Vegetative	Loamy	Brown					Moli Rainforest	Moli Rainforest	24.1092	97.9867	813
T256	FI_RS09	Tracheophyta	Magnoliopsida	Sapindales	Simaroubaceae	Picrasma	Picrasma javanica	Sunny	Heliophyte	Moist	Reserve	Tree (>10m)	5-10cm	55.3	Vegetative	Loamy	Brown					Moli Rainforest	Moli Rainforest	24.1092	97.9867	813
T256	FI_RS07	Tracheophyta	Magnoliopsida	Sapindales	Simaroubaceae	Picrasma	Picrasma javanica	Sunny	Heliophyte	Moist	Reserve	Tree (>10m)	5-10cm	61.5	Vegetative	Loamy	Brown					Moli Rainforest	Moli Rainforest	24.1092	97.9867	813
B026	KD_RS19	Tracheophyta	Magnoliopsida	Sapindales	Anacardiaceae	Pistacia	Pistacia weinmanniifolia	Sunny	Skiophyte	Dry	Hillside	Shrub (<2m)	5-10cm	57.1	Vegetative	Loamy	Brown					Botanical Garden	Botanical Garden	24.0693	97.8202	1112
B026	KD_RS22	Tracheophyta	Magnoliopsida	Sapindales	Anacardiaceae	Pistacia	Pistacia weinmanniifolia	Sunny	Skiophyte	Dry	Hillside	Shrub (<2m)	5-10cm	63.5	Vegetative	Loamy	Brown					Botanical Garden	Botanical Garden	24.0693	97.8202	1112
B026	KD_RS20	Tracheophyta	Magnoliopsida	Sapindales	Anacardiaceae	Pistacia	Pistacia weinmanniifolia	Sunny	Skiophyte	Dry	Hillside	Shrub (<2m)	5-10cm	99	Vegetative	Loamy	Brown					Botanical Garden	Botanical Garden	24.0693	97.8202	1112
T061	LS_RS20	Tracheophyta	Magnoliopsida	Sapindales	Anacardiaceae	Pistacia	Pistacia weinmanniifolia	Sunny	Heliophyte	Moist	Hillside	Shrub (<2m)	10-15cm	67.2	Vegetative	Loamy	Brown	33.33	13.2	52.8	29.95	Wanding Town	Huihuan River	24.1276	98.0517	738
T061	LS_RS22	Tracheophyta	Magnoliopsida	Sapindales	Anacardiaceae	Pistacia	Pistacia weinmanniifolia	Sunny	Heliophyte	Moist	Hillside	Shrub (<2m)	10-15cm	71.7	Vegetative	Loamy	Brown	33.33	13.2	52.8	29.95	Wanding Town	Huihuan River	24.1276	98.0517	738
T061	LS_RS21	Tracheophyta	Magnoliopsida	Sapindales	Anacardiaceae	Pistacia	Pistacia weinmanniifolia	Sunny	Heliophyte	Moist	Hillside	Shrub (<2m)	10-15cm	89.7	Vegetative	Loamy	Brown	33.33	13.2	52.8	29.95	Wanding Town	Huihuan River	24.1276	98.0517	738
T066	LV_RS14	Tracheophyta	Magnoliopsida	Sapindales	Rutaceae	Poaceae unassigned	Poaceae unassigned	Sunny	Heliophyte	Moist	Hillside		10-15cm	69.2	Vegetative	Loamy	Brown	43.53	16.43	65.73	29.04	Wanding Town	Huihuan River	24.1282	98.0522	738
A058	FG_RS16	Tracheophyta	Magnoliopsida	Sapindales	Sapindaceae	Pometia	Pometia pinnata	Sunny	Skiophyte	Moist	Hillside	Tree (<10m)	10-15cm	60.6	Vegetative	Loamy	Brown	34.73	13.63	54.53	19.44	Botanical Garden	Botanical Garden	24.0692	97.8206	1110
A058	FG_RS18	Tracheophyta	Magnoliopsida	Sapindales	Sapindaceae	Pometia	Pometia pinnata	Sunny	Skiophyte	Moist	Hillside	Tree (<10m)	10-15cm	101.5	Vegetative	Loamy	Brown	34.73	13.63	54.53	19.44	Botanical Garden	Botanical Garden	24.0692	97.8206	1110
A058	FG_RS22	Tracheophyta	Magnoliopsida	Sapindales	Sapindaceae	Pometia	Pometia pinnata	Sunny	Skiophyte	Moist	Hillside	Tree (<10m)	10-15cm	66.2	Vegetative	Loamy	Brown	34.73	13.63	54.53	19.44	Botanical Garden	Botanical Garden	24.0692	97.8206	1110
B010	ZF_RS03	Tracheophyta	Magnoliopsida	Sapindales	Anacardiaceae	Rhus	Rhus chinensis	Sunny	Skiophyte	Moist	Hillside	Tree (>10m)	5-10cm	60.7	Vegetative	Loamy	Brown	30.4	12.27	49.07	15.52	Botanical Garden	Botanical Garden	24.0695	97.82	1116
B010	ZF_RS04	Tracheophyta	Magnoliopsida	Sapindales	Anacardiaceae	Rhus	Rhus chinensis	Sunny	Skiophyte	Moist	Hillside	Tree (>10m)	5-10cm	112.8	Vegetative	Loamy	Brown	30.4	12.27	49.07	15.52	Botanical Garden	Botanical Garden	24.0695	97.82	1116
B010	ZF_RS05	Tracheophyta	Magnoliopsida	Sapindales	Anacardiaceae	Rhus	Rhus chinensis	Sunny	Skiophyte	Moist	Hillside	Tree (>10m)	5-10cm	102.5	Vegetative	Loamy	Brown	30.4	12.27	49.07	15.52	Botanical Garden	Botanical Garden	24.0695	97.82	1116
A007	FF_RS12	Tracheophyta	Magnoliopsida	Sapindales	Sapindaceae	Sapindus	Sapindus saponaria	Sunny	Heliophyte	Moist	Hillside	Tree (<10m)	15-20cm	85.8	Vegetative	Loamy	Red	36.6	14.23	56.93	19.66	Botanical Garden	Botanical Garden	24.0693	97.8198	1111
A067	FF_RS14	Tracheophyta	Magnoliopsida	Sapindales	Anacardiaceae	Semecarpus	Semecarpus microcarpus	Sunny	Skiophyte	Moist	Hillside	Tree (<10m)	5-10cm	101.3	Vegetative	Loamy	Brown	31.7	12.7	50.8	21.87	Botanical Garden	Botanical Garden	24.0692	97.8207	1110
B023	KE_RS21	Tracheophyta	Magnoliopsida	Sapindales	Anacardiaceae	Semecarpus	Semecarpus reticulatus	Sunny	Heliophyte	Moist	Hillside		5-10cm	119.3	Vegetative	Loamy	Brown	28.7	11.73	46.93	22.62	Botanical Garden	Botanical Garden	24.0694	97.8195	1116
A045	FH_RS14	Tracheophyta	Magnoliopsida	Sapindales	Meliaceae	Toona	Toona ciliata	Sunny	Heliophyte	Moist	Hillside	Tree (>10m)	5-10cm	102.6	Vegetative	Loamy	Brown					Botanical Garden	Botanical Garden	24.0711	97.8181	1135
T209	CB_RS24	Tracheophyta	Magnoliopsida	Sapindales	Meliaceae	Toona	Toona ciliata	Shower	Heliophyte	Moist	Park	Tree (>10m)	5-10cm	102.7	Vegetative	Loamy	Brown	31.1	12.5	50	24.98	City Park	Nanmao Lake	24.0113	97.8726	735
T257	FI_RS11	Tracheophyta	Magnoliopsida	Sapindales	Meliaceae	Toona	Toona ciliata	Sunny	Heliophyte	Moist	Reserve	Tree (>10m)	5-10cm	54.2	Vegetative	Loamy	Brown					Moli Rainforest	Moli Rainforest	24.1097	97.9859	813
F089	ZE_RS01	Tracheophyta	Magnoliopsida	Sapindales	Meliaceae	Toona	Toona sureni	Sunny	Heliophyte	Moist	Hillside	Tree (>10m)	5-10cm	107.5	Flowering	Loamy	Brown	25.4	10.67	42.67	24.25	Wanding Town	Wanding Forest Park	24.0906	98.0589	1046
B035	HE_RS04	Tracheophyta	Magnoliopsida	Sapindales	Rutaceae	Zanthoxylum	Zanthoxylum asiaticum	Sunny	Skiophyte	Moist	Hillside	Vine	0-5cm	86.3	Vegetative	Loamy	Brown	39.37	15.13	60.53	20.5	Botanical Garden	Botanical Garden	24.0695	97.8187	1109
T086	HA_RS14	Tracheophyta	Magnoliopsida	Sapindales	Rutaceae	Zanthoxylum	Zanthoxylum asiaticum	Sunny	Skiophyte	Moist	Hillside	Vine	5-10cm	51.6	Vegetative	Loamy	Brown	34.97	13.7	54.8	26.43	Wanding Town	Huihuan River	24.1205	98.0426	851
B140	LU_RS13	Tracheophyta	Magnoliopsida	Saxifragales	Iteaceae	Itea	Itea macrophylla	Sunny	Skiophyte	Moist	Hillside	Tree (<10m)	0-5cm	112.1	Vegetative	Loamy	Brown	30.37	12.27	49.07	25.41	Botanical Garden	Botanical Garden	24.0686	97.821	1072
B140	LU_RS14	Tracheophyta	Magnoliopsida	Saxifragales	Iteaceae	Itea	Itea macrophylla	Sunny	Skiophyte	Moist	Hillside	Tree (<10m)	0-5cm	103.2	Vegetative	Loamy	Brown	30.37	12.27	49.07	25.41	Botanical Garden	Botanical Garden	24.0686	97.821	1072
A022	HB_RS02	Tracheophyta	Magnoliopsida	Saxifragales	Altingiaceae	Liquidambar	Liquidambar excelsa	Sunny	Skiophyte	Moist	Hillside	Tree (>10m)	0-5cm	99.6	Vegetative	Loamy	Brown	34.63	13.63	54.53	26.31	Botanical Garden	Botanical Garden	24.0693	97.8199	1107
T115	KJ_RS16	Tracheophyta	Magnoliopsida	Saxifragales	Hamamelidaceae	Loropetalum	Loropetalum chinense	Sunny	Skiophyte	Moist	Park	Shrub (<2m)	5-10cm	169.6	Vegetative	Loamy	Brown	24.5	10.4	40.93	21.27	City Park	Nanmao Lake	24.0097	97.8704	733
T115	KJ_RS15	Tracheophyta	Magnoliopsida	Saxifragales	Hamamelidaceae	Loropetalum	Loropetalum chinense	Sunny	Skiophyte	Moist	Park	Shrub (<2m)	5-10cm	178.9	Vegetative	Loamy	Brown	24.5	10.4	40.93	21.27	City Park	Nanmao Lake	24.0097	97.8704	733
T115	KJ_RS14	Tracheophyta	Magnoliopsida	Saxifragales	Hamamelidaceae	Loropetalum	Loropetalum chinense	Sunny	Skiophyte	Moist	Park	Shrub (<2m)	5-10cm	290.1	Vegetative	Loamy	Brown	24.5	10.4	40.93	21.27	City Park	Nanmao Lake	24.0097	97.8704	733
T215	XI_RS17	Tracheophyta	Magnoliopsida	Saxifragales	Hamamelidaceae	Loropetalum	Loropetalum chinense	Sunny	Heliophyte	Moist	Park	Shrub (<2m)	5-10cm	101.6	Vegetative	Loamy	Brown	29.73	12.07	48.93	27.2	City Park	Nanmao Lake	24.0113	97.8725	730
T215	XI_RS19	Tracheophyta	Magnoliopsida	Saxifragales	Hamamelidaceae	Loropetalum	Loropetalum chinense	Sunny	Heliophyte	Moist	Park	Shrub (<2m)	5-10cm	110.7	Vegetative	Loamy	Brown	29.73	12.07	48.93	27.2	City Park	Nanmao Lake	24.0113	97.8725	730
T215	XI_RS18	Tracheophyta	Magnoliopsida	Saxifragales	Hamamelidaceae	Loropetalum	Loropetalum chinense	Sunny	Heliophyte	Moist	Park	Shrub (<2m)	5-10cm	109.5	Vegetative	Loamy	Brown	29.73	12.07	48.93	27.2	City Park	Nanmao Lake	24.0113	97.8725	730
T326	LC_RS09	Tracheophyta	Magnoliopsida	Saxifragales	Hamamelidaceae	Loropetalum	Loropetalum chinense	Sunny	Heliophyte	Moist	Park	Shrub (<2m)	0-5cm	102.9	Flowering	Loamy	Brown	17.8	8.27	33.07	20.35	City Park	Longmo Lake	24.0027	97.8427	730
B133	ZF_RS16	Tracheophyta	Polypodiopsida	Schizaeales	Lygodiaceae	Lygodium	Lygodium japonicum	Sunny	Heliophyte	Moist	Hillside	Vine	0-5cm	90.2	Vegetative	Loamy	Brown	28.23	11.6	46.4	20.35	Botanical Garden	Botanical Garden	24.0684	97.8206	1072
E011	XC_RS20	Tracheophyta	Lycopodiopsida	Selaginellales	Selaginellaceae	Selaginella	Selaginella uncinata	Shower	Skiophyte	Moist	Hillside	Herb	0-5cm	48.8	Vegetative	Loamy	Brown					Botanical Garden	Botanical Garden	24.0706	97.8201	1072
T088	HA_RS18	Tracheophyta	Magnoliopsida	Solanales	Solanaceae	Brugmansia	Brugmansia arborea	Sunny	Skiophyte	Moist	Hillside	Herb	5-10cm	107.5	Flowering	Loamy	Brown	32	12.8	51.2	25	Wanding Town	Huihuan River	24.119	98.0412	851
T088	HA_RS17	Tracheophyta	Magnoliopsida	Solanales	Solanaceae	Brugmansia	Brugmansia arborea	Sunny	Skiophyte	Moist	Hillside	Herb	5-10cm	120.1	Flowering	Loamy	Brown	32	12.8	51.2	25	Wanding Town	Huihuan River	24.119	98.0412	851
T088	HA_RS16	Tracheophyta	Magnoliopsida	Solanales	Solanaceae	Brugmansia	Brugmansia arborea	Sunny	Skiophyte	Moist	Hillside	Herb	5-10cm	100.4	Flowering	Loamy	Brown	32	12.8	51.2	25	Wanding Town	Huihuan River	24.119	98.0412	851
D005	LU_RS06	Tracheophyta	Magnoliopsida	Solanales	Convolvulaceae	Ipomoea	Ipomoea batatas	Sunny	Heliophyte	Moist	Hillside	Vine	0-5cm	104.1	Fruiting	Loamy	Brown	29.63	12.03	48.13	19.04	Botanical Garden	Botanical Garden	24.0681	97.82	1072
E029	KA_RS21	Tracheophyta	Magnoliopsida	Solanales	Convolvulaceae	Ipomoea	Ipomoea cairica	Shower	Skiophyte	Moist	Hillside	Herb	0-5cm	100.2	Vegetative	Loamy	Brown	31.77	12.7	50.8	18.85	Botanical Garden	Botanical Garden	24.071	97.8194	1082
T039	LQ_RS08	Tracheophyta	Magnoliopsida	Solanales	Convolvulaceae	Ipomoea	Ipomoea cairica	Sunny	Heliophyte	Dry	Hillside	Herb	5-10cm	96.8	Flowering	Sandy	Yellow	23.07	9.9	39.6	26.54	Botanical Garden	Jingcheng Ariport	24.0684	97.8165	1106
T039	LQ_RS09	Tracheophyta	Magnoliopsida	Solanales	Convolvulaceae	Ipomoea	Ipomoea cairica	Sunny	Heliophyte	Dry	Hillside	Herb	5-10cm	83.9	Flowering	Sandy	Yellow	23.07	9.9	39.6	26.54	Botanical Garden	Jingcheng Ariport	24.0684	97.8165	1106
T039	LQ_RS07	Tracheophyta	Magnoliopsida	Solanales	Convolvulaceae	Ipomoea	Ipomoea cairica	Sunny	Heliophyte	Dry	Hillside	Herb	5-10cm	79.4	Flowering	Sandy	Yellow	23.07	9.9	39.6	26.54	Botanical Garden	Jingcheng Ariport	24.0684	97.8165	1106
C027	XG_RS03	Tracheophyta	Magnoliopsida	Solanales	Solanaceae	Solanum	Solanum aculeatissimum	Sunny	Skiophyte	Moist	Reserve	Shrub (<2m)	0-5cm	99.1	Vegetative	Loamy	Brown	34.77	13.63	54.53	21.83	Moli Rainforest	Moli Rainforest	24.1059	97.9828	838
C027	XG_RS02	Tracheophyta	Magnoliopsida	Solanales	Solanaceae	Solanum	Solanum aculeatissimum	Sunny	Skiophyte	Moist	Reserve	Shrub (<2m)	0-5cm	109.5	Vegetative	Loamy	Brown	34.77	13.63	54.53	21.83	Moli Rainforest	Moli Rainforest	24.1059	97.9828	838
C027	XG_RS01	Tracheophyta	Magnoliopsida	Solanales	Solanaceae	Solanum	Solanum aculeatissimum	Sunny	Skiophyte	Moist	Reserve	Shrub (<2m)	0-5cm	59.8	Vegetative	Loamy	Brown	34.77	13.63	54.53	21.83	Moli Rainforest	Moli Rainforest	24.1059	97.9828	838
E046	XC_RS09	Tracheophyta	Magnoliopsida	Solanales	Solanaceae	Solanum	Solanum americanum	Shower	Skiophyte	Moist	Hillside	Herb	0-5cm	100.9	Vegetative	Loamy	Brown	18.93	8.63	34.53	14.66	Botanical Garden	Botanical Garden	24.0698	97.8193	1098
A038	FF_RS02	Tracheophyta	Magnoliopsida	Solanales	Solanaceae	Solanum	Solanum betaceum	Sunny	Heliophyte	Moist	Hillside	Shrub (>2m)	5-10cm	105.5	Vegetative	Loamy	Brown	23.3	10	40	24.31	Botanical Garden	Botanical Garden	24.0695	97.8191	1116
T050	LP_RS04	Tracheophyta	Magnoliopsida	Solanales	Solanaceae	Solanum	Solanum betaceum	Sunny	Heliophyte	Moist	Nursery	Shrub (>2m)	5-10cm	101.4	Fruiting	Loamy	Brown	30.27	12.23	48.93	29.18	Wanding Town	Huihuan Village	24.1194	98.0467	739
T049	HA_RS22	Tracheophyta	Magnoliopsida	Solanales	Solanaceae	Solanum	Solanum spirale	Sunny	Heliophyte	Moist	Nursery	Shrub (<2m)	5-10cm	89.9	Fruiting	Loamy	Brown	33.35	12.9	52.8	21.58	Wanding Town	Huihuan Village	24.1194	98.0467	739
T092	KH_RS15	Tracheophyta	Magnoliopsida	Solanales	Solanaceae	Solanum	Solanum spirale	Sunny	Heliophyte	Moist	Hillside	Shrub (<2m)	5-10cm	94.8	Flowering	Loamy	Brown	28.63	11.7	46.8	22.39	Botanical Garden	Botanical Garden	24.0696	97.8192	1116
C088	FE_RS11	Tracheophyta	Magnoliopsida	Vitales	Vitaceae	Cayratia	Cayratia japonica	Sunny	Skiophyte	Moist	Reserve	Vine	0-5cm	100	Vegetative	Loamy	Brown	30.33	12.23	48.93	20.64	Moli Rainforest	Moli Rainforest	24.1134	97.9835	921
E079	XD_RS14	Tracheophyta	Magnoliopsida	Vitales	Vitaceae	Cayratia	Cayratia japonica	Shower	Skiophyte	Moist	Hillside	Vine	0-5cm	93.4	Vegetative	Loamy	Brown	24.07	10.7	42.8	15.93	Botanical Garden	Botanical Garden	24.0705	97.8177	1111
B005	ZG_RS06	Tracheophyta	Magnoliopsida	Vitales	Vitaceae	Cissus	Cissus discolor	Sunny	Skiophyte	Moist	Hillside	Vine	0-5cm	42.3	Vegetative	Loamy	Brown	28.33	11.63	46.53	15	Botanical Garden	Botanical Garden	24.0692	97.8193	1109
B005	ZG_RS05	Tracheophyta	Magnoliopsida	Vitales	Vitaceae	Cissus	Cissus discolor	Sunny	Skiophyte	Moist	Hillside	Vine	0-5cm	62.1	Vegetative	Loamy	Brown	28.33	11.63	46.53	15	Botanical Garden	Botanical Garden	24.0692	97.8193	1109
B145	ZG_RS18	Tracheophyta	Magnoliopsida	Vitales	Vitaceae	Leea	Leea asiatica	Sunny	Skiophyte	Moist	Hillside	Shrub (<2m)	5-10cm	107.1	Vegetative	Loamy	Brown	28.3	11.6	46.4	26.06	Botanical Garden	Botanical Garden	24.0685	97.8212	1094
B145	ZG_RS16	Tracheophyta	Magnoliopsida	Vitales	Vitaceae	Leea	Leea asiatica	Sunny	Skiophyte	Moist	Hillside	Shrub (<2m)	5-10cm	111.3	Vegetative	Loamy	Brown	28.3	11.6	46.4	26.06	Botanical Garden	Botanical Garden	24.0685	97.8212	1094
B145	ZG_RS17	Tracheophyta	Magnoliopsida	Vitales	Vitaceae	Leea	Leea asiatica	Sunny	Skiophyte	Moist	Hillside	Shrub (<2m)	5-10cm	102.1	Vegetative	Loamy	Brown	28.3	11.6	46.4	26.06	Botanical Garden	Botanical Garden	24.0685	97.8212	1094
B054	KD_RS08	Tracheophyta	Magnoliopsida	Vitales	Vitaceae	Leea	Leea indica	Sunny	Skiophyte	Moist	Hillside	Vine	5-10cm	56.5	Vegetative	Loamy	Brown	30.93	12.43	49.73	16.2	Botanical Garden	Botanical Garden	24.0707	97.8175	1112
B054	KD_RS24	Tracheophyta	Magnoliopsida	Vitales	Vitaceae	Leea	Leea indica	Sunny	Skiophyte	Moist	Hillside	Vine	5-10cm	69.1	Vegetative	Loamy	Brown	30.93	12.43	49.73	16.2	Botanical Garden	Botanical Garden	24.0707	97.8175	1112
B054	KD_RS05	Tracheophyta	Magnoliopsida	Vitales	Vitaceae	Leea	Leea indica	Sunny	Skiophyte	Moist	Hillside	Vine	5-10cm	51.3	Vegetative	Loamy	Brown	30.93	12.43	49.73	16.2	Botanical Garden	Botanical Garden	24.0707	97.8175	1112
B069	HD_RS14	Tracheophyta	Magnoliopsida	Vitales	Vitaceae	Tetrastigma	Tetrastigma planicaule	Sunny	Skiophyte	Moist	Hillside	Vine	0-5cm	80.9	Fruiting	Loamy	Brown	33.1	12.53	50.4	17.52	Botanical Garden	Botanical Garden	24.0718	97.8163	1119
T279	CD_RS04	Tracheophyta	Magnoliopsida	Vitales	Vitaceae	Tetrastigma	Tetrastigma planicaule	Sunny	Skiophyte	Moist	Reserve	Vine	0-5cm	113.1	Vegetative	Loamy	Brown					Moli Rainforest	Moli Rainforest	24.1118	97.9845	851
T279	CD_RS05	Tracheophyta	Magnoliopsida	Vitales	Vitaceae	Tetrastigma	Tetrastigma planicaule	Sunny	Skiophyte	Moist	Reserve	Vine	0-5cm	112.9	Vegetative	Loamy	Brown					Moli Rainforest	Moli Rainforest	24.1118	97.9845	851
T279	CD_RS07	Tracheophyta	Magnoliopsida	Vitales	Vitaceae	Tetrastigma	Tetrastigma planicaule	Sunny	Skiophyte	Moist	Reserve	Vine	0-5cm	84.4	Vegetative	Loamy	Brown					Moli Rainforest	Moli Rainforest	24.1118	97.9845	851
F096	LH_RS15	Tracheophyta	Liliopsida	Zingiberales	Zingiberaceae	Alpinia	Alpinia galanga	Sunny	Skiophyte	Moist	Nursery	Herb	5-10cm	103.1	Vegetative	Loamy	Yellow	27.83	11.43	45.73	34.54	Wanding Town	Wanding Forest Park	24.0856	98.0726	857
B088	XE_RS06	Tracheophyta	Liliopsida	Zingiberales	Zingiberaceae	Alpinia	Alpinia hainanensis	Sunny	Skiophyte	Moist	Hillside	Herb	5-10cm	102	Fruiting	Loamy	Brown	33.5	13.27	52.1	22.56	Botanical Garden	Botanical Garden	24.0712	97.818	1140
B088	XE_RS07	Tracheophyta	Liliopsida	Zingiberales	Zingiberaceae	Alpinia	Alpinia hainanensis	Sunny	Skiophyte	Moist	Hillside	Herb	5-10cm	113	Fruiting	Loamy	Brown	33.5	13.27	52.1	22.56	Botanical Garden	Botanical Garden	24.0712	97.818	1140
B088	XE_RS05	Tracheophyta	Liliopsida	Zingiberales	Zingiberaceae	Alpinia	Alpinia hainanensis	Sunny	Skiophyte	Moist	Hillside	Herb	5-10cm	121.5	Fruiting	Loamy	Brown	33.5	13.27	52.1	22.56	Botanical Garden	Botanical Garden	24.0712	97.818	1140
T140	FG_RS01	Tracheophyta	Liliopsida	Zingiberales	Zingiberaceae	Alpinia	Alpinia zerumbet	Sunny	Skiophyte	Moist	Park	Herb	5-10cm	99.4	Vegetative	Loamy	Brown	28.03	11.5	46	21.2	City Park	Nanmao Lake	24.0104	97.8727	715
T140	FG_RS03	Tracheophyta	Liliopsida	Zingiberales	Zingiberaceae	Alpinia	Alpinia zerumbet	Sunny	Skiophyte	Moist	Park	Herb	5-10cm	112.2	Vegetative	Loamy	Brown	28.03	11.5	46	21.2	City Park	Nanmao Lake	24.0104	97.8727	715
T140	KI_RS02	Tracheophyta	Liliopsida	Zingiberales	Zingiberaceae	Alpinia	Alpinia zerumbet	Sunny	Skiophyte	Moist	Park	Herb	5-10cm	110.1	Vegetative	Loamy	Brown	28.03	11.5	46	21.2	City Park	Nanmao Lake	24.0104	97.8727	715
C083	FE_RS24	Tracheophyta	Liliopsida	Zingiberales	Zingiberaceae	Amomum	Amomum sericeum	Sunny	Skiophyte	Moist	Reserve		0-5cm	86.3	Vegetative	Loamy	Brown	36.33	14.17	56.67	19.96	Moli Rainforest	Moli Rainforest	24.114	97.983	900
T183	LF_RS23	Tracheophyta	Magnoliopsida	Zingiberales	Cannaceae	Canna	Canna indica	Sunny	Heliophyte	Moist	Park	Tree (<10m)	0-5cm	99	Vegetative	Loamy	Brown	33.13	13.17	52.53	26.31	City Park	Nanmao Lake	24.0107	97.8696	731
B130	KC_RS21	Tracheophyta	Liliopsida	Zingiberales	Zingiberaceae	Curcuma	Curcuma aromatica	Sunny	Skiophyte	Moist	Hillside	Herb	0-5cm	106.7	Vegetative	Loamy	Brown	21.93	9.57	38.27	20.31	Botanical Garden	Botanical Garden	24.0682	97.8204	1072
B130	KC_RS19	Tracheophyta	Liliopsida	Zingiberales	Zingiberaceae	Curcuma	Curcuma aromatica	Sunny	Skiophyte	Moist	Hillside	Herb	0-5cm	100.8	Vegetative	Loamy	Brown	21.93	9.57	38.27	20.31	Botanical Garden	Botanical Garden	24.0682	97.8204	1072
B130	KC_RS22	Tracheophyta	Liliopsida	Zingiberales	Zingiberaceae	Curcuma	Curcuma aromatica	Sunny	Skiophyte	Moist	Hillside	Herb	0-5cm	101.9	Vegetative	Loamy	Brown	21.93	9.57	38.27	20.31	Botanical Garden	Botanical Garden	24.0682	97.8204	1072
B130	HD_RS02	Tracheophyta	Liliopsida	Zingiberales	Zingiberaceae	Curcuma	Curcuma aromatica	Sunny	Skiophyte	Moist	Hillside	Herb	0-5cm	47.3	Vegetative	Loamy	Brown	21.93	9.57	38.27	20.31	Botanical Garden	Botanical Garden	24.0682	97.8204	1072
C059	FD_RS03	Tracheophyta	Liliopsida	Zingiberales	Zingiberaceae	Curcuma	Curcuma longa	Sunny	Heliophyte	Moist	Reserve	Herb	0-5cm	108.6	Vegetative	Loamy	Brown	21.9	9.57	38.27	16.72	Moli Rainforest	Moli Rainforest	24.1161	97.9801	942
C059	FD_RS04	Tracheophyta	Liliopsida	Zingiberales	Zingiberaceae	Curcuma	Curcuma longa	Sunny	Heliophyte	Moist	Reserve	Herb	0-5cm	107.7	Vegetative	Loamy	Brown	21.9	9.57	38.27	16.72	Moli Rainforest	Moli Rainforest	24.1161	97.9801	942
C059	FD_RS05	Tracheophyta	Liliopsida	Zingiberales	Zingiberaceae	Curcuma	Curcuma longa	Sunny	Heliophyte	Moist	Reserve	Herb	0-5cm	109.3	Vegetative	Loamy	Brown	21.9	9.57	38.27	16.72	Moli Rainforest	Moli Rainforest	24.1161	97.9801	942
B061	ZG_RS10	Tracheophyta	Liliopsida	Zingiberales	Zingiberaceae	Globba	Globba racemosa	Sunny	Skiophyte	Moist	Hillside	Herb	0-5cm	106.9	Vegetative	Loamy	Brown	27.67	11.4	45.6	17.93	Botanical Garden	Botanical Garden	24.0711	97.817	1130
B061	ZG_RS11	Tracheophyta	Liliopsida	Zingiberales	Zingiberaceae	Globba	Globba racemosa	Sunny	Skiophyte	Moist	Hillside	Herb	0-5cm	108.1	Vegetative	Loamy	Brown	27.67	11.4	45.6	17.93	Botanical Garden	Botanical Garden	24.0711	97.817	1130
B061	ZG_RS09	Tracheophyta	Liliopsida	Zingiberales	Zingiberaceae	Globba	Globba racemosa	Sunny	Skiophyte	Moist	Hillside	Herb	0-5cm	103.3	Vegetative	Loamy	Brown	27.67	11.4	45.6	17.93	Botanical Garden	Botanical Garden	24.0711	97.817	1130
B129	KC_RS24	Tracheophyta	Liliopsida	Zingiberales	Zingiberaceae	Hedychium	Hedychium coronarium	Sunny	Skiophyte	Moist	Hillside	Herb	5-10cm	102.6	Vegetative	Loamy	Brown	34.53	13.6	54.4	20.89	Botanical Garden	Botanical Garden	24.0681	97.8203	1072
B129	KC_RS23	Tracheophyta	Liliopsida	Zingiberales	Zingiberaceae	Hedychium	Hedychium coronarium	Sunny	Skiophyte	Moist	Hillside	Herb	5-10cm	100.8	Vegetative	Loamy	Brown	34.53	13.6	54.4	20.89	Botanical Garden	Botanical Garden	24.0681	97.8203	1072
B129	KC_RS20	Tracheophyta	Liliopsida	Zingiberales	Zingiberaceae	Hedychium	Hedychium coronarium	Sunny	Skiophyte	Moist	Hillside	Herb	5-10cm	96.2	Vegetative	Loamy	Brown	34.53	13.6	54.4	20.89	Botanical Garden	Botanical Garden	24.0681	97.8203	1072
T253	FI_RS05	Tracheophyta	Liliopsida	Zingiberales	Heliconiaceae	Heliconia	Heliconia metallica	Sunny	Skiophyte	Moist	Reserve	Herb	5-10cm	102.7	Flowering	Loamy	Brown	36.03	14.07	56.27	20.7	Moli Rainforest	Moli Rainforest	24.1099	97.9865	813
T253	FI_RS06	Tracheophyta	Liliopsida	Zingiberales	Heliconiaceae	Heliconia	Heliconia metallica	Sunny	Skiophyte	Moist	Reserve	Herb	5-10cm	103.6	Flowering	Loamy	Brown	36.03	14.07	56.27	20.7	Moli Rainforest	Moli Rainforest	24.1099	97.9865	813
T253	CD_RS09	Tracheophyta	Liliopsida	Zingiberales	Heliconiaceae	Heliconia	Heliconia metallica	Sunny	Skiophyte	Moist	Reserve	Herb	5-10cm	103	Flowering	Loamy	Brown	36.03	14.07	56.27	20.7	Moli Rainforest	Moli Rainforest	24.1099	97.9865	813
B141	LU_RS16	Tracheophyta	Liliopsida	Zingiberales	Costaceae	Hellenia	Hellenia speciosa	Sunny	Skiophyte	Moist	Hillside	Herb	5-10cm	130.4	Vegetative	Loamy	Brown	31.9	12.73	50.93	24.23	Botanical Garden	Botanical Garden	24.0685	97.821	1072
B141	LU_RS15	Tracheophyta	Liliopsida	Zingiberales	Costaceae	Hellenia	Hellenia speciosa	Sunny	Skiophyte	Moist	Hillside	Herb	5-10cm	106.9	Vegetative	Loamy	Brown	31.9	12.73	50.93	24.23	Botanical Garden	Botanical Garden	24.0685	97.821	1072
B141	LU_RS17	Tracheophyta	Liliopsida	Zingiberales	Costaceae	Hellenia	Hellenia speciosa	Sunny	Skiophyte	Moist	Hillside	Herb	5-10cm	116.4	Vegetative	Loamy	Brown	31.9	12.73	50.93	24.23	Botanical Garden	Botanical Garden	24.0685	97.821	1072
T280	CD_RS02	Tracheophyta	Liliopsida	Zingiberales	Musaceae	Musa	Musa balbisiana	Sunny	Heliophyte	Moist	Reserve	Tree (<10m)	0-5cm	103.9	Vegetative	Loamy	Brown	30.87	12.4	49.6	23.31	Moli Rainforest	Moli Rainforest	24.1122	97.9842	866
T280	CD_RS03	Tracheophyta	Liliopsida	Zingiberales	Musaceae	Musa	Musa balbisiana	Sunny	Heliophyte	Moist	Reserve	Tree (<10m)	0-5cm	111.2	Vegetative	Loamy	Brown	30.87	12.4	49.6	23.31	Moli Rainforest	Moli Rainforest	24.1122	97.9842	866
T280	CD_RS01	Tracheophyta	Liliopsida	Zingiberales	Musaceae	Musa	Musa balbisiana	Sunny	Heliophyte	Moist	Reserve	Tree (<10m)	0-5cm	120.2	Vegetative	Loamy	Brown	30.87	12.4	49.6	23.31	Moli Rainforest	Moli Rainforest	24.1122	97.9842	866
A050	FH_RS23	Tracheophyta	Liliopsida	Zingiberales	Musaceae	Musa	Musa basjoo	Sunny	Skiophyte	Moist	Hillside	Herb	10-15cm	122.2	Vegetative	Loamy	Brown	31.2	12.5	50	21.93	Botanical Garden	Botanical Garden	24.0716	97.8162	1132
A050	FH_RS15	Tracheophyta	Liliopsida	Zingiberales	Musaceae	Musa	Musa basjoo	Sunny	Skiophyte	Moist	Hillside	Herb	10-15cm	100.5	Vegetative	Loamy	Brown	31.2	12.5	50	21.93	Botanical Garden	Botanical Garden	24.0716	97.8162	1132
A050	FH_RS24	Tracheophyta	Liliopsida	Zingiberales	Musaceae	Musa	Musa basjoo	Sunny	Skiophyte	Moist	Hillside	Herb	10-15cm	120.3	Vegetative	Loamy	Brown	31.2	12.5	50	21.93	Botanical Garden	Botanical Garden	24.0716	97.8162	1132
B142	LU_RS19	Tracheophyta	Liliopsida	Zingiberales	Musaceae	Musa	Musa unassigned	Sunny	Skiophyte	Moist	Hillside	Herb	0-5cm	106.8	Vegetative	Loamy	Brown					Botanical Garden	Botanical Garden	24.0685	97.8211	1072
B142	LU_RS20	Tracheophyta	Liliopsida	Zingiberales	Musaceae	Musa	Musa unassigned	Sunny	Skiophyte	Moist	Hillside	Herb	0-5cm	108.1	Vegetative	Loamy	Brown					Botanical Garden	Botanical Garden	24.0685	97.8211	1072
B142	LU_RS18	Tracheophyta	Liliopsida	Zingiberales	Musaceae	Musa	Musa unassigned	Sunny	Skiophyte	Moist	Hillside	Herb	0-5cm	114.7	Vegetative	Loamy	Brown					Botanical Garden	Botanical Garden	24.0685	97.8211	1072
T414	LA_RS21	Tracheophyta	Liliopsida	Zingiberales	Strelitziaceae	Ravenala	Ravenala madagascariensis	Sunny	Heliophyte	Moist	Park	Herb	5-10cm	110.6	Vegetative	Loamy	Red	31.17	12.5	50	25.22	City Park	Longmo Lake	24.0012	97.8343	730
T414	LA_RS23	Tracheophyta	Liliopsida	Zingiberales	Strelitziaceae	Ravenala	Ravenala madagascariensis	Sunny	Heliophyte	Moist	Park	Herb	5-10cm	104.7	Vegetative	Loamy	Red	31.17	12.5	50	25.22	City Park	Longmo Lake	24.0012	97.8343	730
T414	LA_RS22	Tracheophyta	Liliopsida	Zingiberales	Strelitziaceae	Ravenala	Ravenala madagascariensis	Sunny	Heliophyte	Moist	Park	Herb	5-10cm	101.8	Vegetative	Loamy	Red	31.17	12.5	50	25.22	City Park	Longmo Lake	24.0012	97.8343	730
B108	HC_RS13	Tracheophyta	Liliopsida	Zingiberales	Marantaceae	Stachyphrynium	Stachyphrynium placentarium	Sunny	Skiophyte	Moist	Hillside	Herb	5-10cm	105.9	Vegetative	Loamy	Brown	29.7	12.07	48.27	17.73	Botanical Garden	Botanical Garden	24.0699	97.8177	1113
B108	HC_RS11	Tracheophyta	Liliopsida	Zingiberales	Marantaceae	Stachyphrynium	Stachyphrynium placentarium	Sunny	Skiophyte	Moist	Hillside	Herb	5-10cm	101.1	Vegetative	Loamy	Brown	29.7	12.07	48.27	17.73	Botanical Garden	Botanical Garden	24.0699	97.8177	1113
B108	HC_RS12	Tracheophyta	Liliopsida	Zingiberales	Marantaceae	Stachyphrynium	Stachyphrynium placentarium	Sunny	Skiophyte	Moist	Hillside	Herb	5-10cm	98	Vegetative	Loamy	Brown	29.7	12.07	48.27	17.73	Botanical Garden	Botanical Garden	24.0699	97.8177	1113
T274	XI_RS10	Tracheophyta	Liliopsida	Zingiberales	Marantaceae	Stachyphrynium	Stachyphrynium placentarium	Sunny	Skiophyte	Moist	Reserve	Herb	5-10cm	108.8	Vegetative	Loamy	Brown	29.4	11.93	47.73	21.41	Moli Rainforest	Moli Rainforest	24.111	97.9852	840
T274	XI_RS11	Tracheophyta	Liliopsida	Zingiberales	Marantaceae	Stachyphrynium	Stachyphrynium placentarium	Sunny	Skiophyte	Moist	Reserve	Herb	5-10cm	103.7	Vegetative	Loamy	Brown	29.4	11.93	47.73	21.41	Moli Rainforest	Moli Rainforest	24.111	97.9852	840
T274	XI_RS09	Tracheophyta	Liliopsida	Zingiberales	Marantaceae	Stachyphrynium	Stachyphrynium placentarium	Sunny	Skiophyte	Moist	Reserve	Herb	5-10cm	99.5	Vegetative	Loamy	Brown	29.4	11.93	47.73	21.41	Moli Rainforest	Moli Rainforest	24.111	97.9852	840
T170	LG_RS02	Tracheophyta	Liliopsida	Zingiberales	Zingiberaceae	Wurfbainia	Wurfbainia villosa	Sunny	Heliophyte	Dry	Park	Herb	0-5cm	101.9	Vegetative	Loamy	Brown	23.5	10.07	40.27	23.79	City Park	Nanmao Lake	24.012	97.871	731
T170	LG_RS01	Tracheophyta	Liliopsida	Zingiberales	Zingiberaceae	Wurfbainia	Wurfbainia villosa	Sunny	Heliophyte	Dry	Park	Herb	0-5cm	77	Vegetative	Loamy	Brown	23.5	10.07	40.27	23.79	City Park	Nanmao Lake	24.012	97.871	731
D001	HD_RS17	Tracheophyta	Liliopsida	Zingiberales	Zingiberaceae	Zingiber	Zingiber smilesianum	Sunny	Skiophyte	Moist	Hillside		0-5cm	105.4	Vegetative	Loamy	Brown	34.13	13.43	53.73	16.66	Botanical Garden	Botanical Garden	24.071	97.818	1132
E033	KA_RS24	Tracheophyta	Liliopsida	Zingiberales	Zingiberaceae	Zingiber	Zingiber striolatum	Shower	Skiophyte	Moist	Hillside	Herb	0-5cm	102.5	Vegetative	Loamy	Brown	29.93	12.1	48.4	15.14	Botanical Garden	Botanical Garden	24.0707	97.8194	1084
E068	KA_RS14	Tracheophyta	Liliopsida	Zingiberales	Zingiberaceae	Zingiber	Zingiber wandingense	Shower	Skiophyte	Moist	Hillside	Herb	0-5cm	107.7	Vegetative	Loamy	Brown	29.8	12.07	48.27	15.23	Botanical Garden	Botanical Garden	24.0704	97.8183	1111
