# Supplementary material for: A quantitative microbiome atlas reveals hidden diversity, eukaryotic keystones, and evolutionary trade-offs in plant rhizospheres
Source: Research Square preprint supplement (doi:10.21203/rs.3.rs-7503976/v1), 2025-09-12
Supplement: Supplementary file 3 [file 30d49c7d4b31671a28c098a1.xlsx]

## Sheet: Table S7A
Supplementary Information Table 7. Phylogenetic conservation and functional coevolution of rhizosphere microbiomes across plant lineages. (A) Bacterial taxonomic coevolution. (B) Fungal taxonomic coevolution. (C) Protistan taxonomic coevolution. (D) Bacterial functional coevolution. (E) Fungal functional conservation. (F) Protistan functional conservation.
ASVID	FeatureID	Kingdom	lambda	logL	logL0	P	FDR	ASVLabel	Class	Order	Family	Genus	Tree_Class	Tree_Order	Tree_Family	Tree_Genus
bASV1577	75cfe5a7cd8b813de5c673dcaf9cbe99	Bacteria	7.33137e-05	-1678.84	-1678.84	1	1	bASV1577|uncultured_bacterium	Entotheonellia	Entotheonellales	Entotheonellaceae	Entotheonellaceae	NA	NA	Lamiaceae	NA
bASV227	16ab4a0438833d298afcbe162fd62721	Bacteria	0.0304012	-1711.42	-1712.74	0.1034	0.333514	bASV227|Herbaspirillum	Gammaproteobacteria	Burkholderiales	Oxalobacteraceae	Herbaspirillum	Others	NA	Zingiberaceae	Pterospermum
bASV165	85dca0308c9d6b58716a94a843d08f38	Bacteria	7.33137e-05	-1600.39	-1600.39	1	1	bASV165|Microbacterium	Actinobacteria	Micrococcales	Microbacteriaceae	Microbacterium	NA	Rosales	Acanthaceae	Brassaiopsis
bASV2058	baba03cc632a7cd5d5aac018cd44802e	Bacteria	0.0245348	-1721.46	-1721.58	0.629405	1	bASV2058|uncultured_Micromonospora	MB-A2-108	MB-A2-108	MB-A2-108	MB-A2-108	NA	Arecales	Arecaceae	Dypsis
bASV1830	d6ceda777f743f2e539c01ceffbc75b3	Bacteria	7.33137e-05	-1679.23	-1679.22	1	1	bASV1830|67-14	Thermoleophilia	Solirubrobacterales	67-14	67-14	NA	NA	Myrtaceae	Pandanus
bASV2088	a8ced1d561212d2fee3eb8d1230358ff	Bacteria	0.0427344	-1739.83	-1740.96	0.131441	0.386536	bASV2088|uncultured_bacterium	Polyangia	Polyangiales	Phaselicystidaceae	Phaselicystis	NA	Myrtales	Myrtaceae	Alocasia
bASV193	2903f01a153f5cb752747254247d6d6a	Bacteria	0.0728309	-1658.7	-1662.38	0.00665577	0.0672222	bASV193|uncultured_bacterium	Subgroup_11	Subgroup_11	Subgroup_11	Subgroup_11	NA	Fabales	Myrtaceae	Pandanus
bASV1244	ab7b24fa0ba6d5faf994d3ba949e1766	Bacteria	7.33137e-05	-1779.63	-1779.63	1	1	bASV1244|Steroidobacteraceae	Gammaproteobacteria	Steroidobacterales	Steroidobacteraceae		NA	Arecales	Arecaceae	Brassaiopsis
bASV2069	00c1ed69d74ffabb5c026837c142d141	Bacteria	7.33137e-05	-1626.25	-1626.24	1	1	bASV2069|Comamonadaceae	Gammaproteobacteria	Burkholderiales	Comamonadaceae		NA	NA	NA	NA
bASV3372	9752c6c49d2f1dbfaad14e110f285e14	Bacteria	0.152857	-1651.67	-1653.34	0.0676651	0.252324	bASV3372|uncultured_bacterium	Chloroflexia	Chloroflexales	Roseiflexaceae		NA	NA	NA	Lagerstroemia
bASV16	14c3a2740b8bfff1bf2fead33fbf6ce2	Bacteria	0.0664928	-1573.44	-1574.38	0.171835	0.452271	bASV16|Bacillus	Bacilli	Bacillales	Bacillaceae	Bacillus	Liliopsida	NA	Urticaceae	Brassaiopsis
bASV3008	6a82f07939cf5f806dd359b6c6f655e4	Bacteria	0.113761	-1679.59	-1687.13	0.000102855	0.00570035	bASV3008|Rhodocyclaceae	Gammaproteobacteria	Burkholderiales	Rhodocyclaceae		NA	Myrtales	Myrtaceae	Fagraea
bASV2227	43f09d6c002899eee9c05474ccdf622e	Bacteria	0.034288	-1697.82	-1698.49	0.246753	0.568497	bASV2227|Roseiflexaceae	Chloroflexia	Chloroflexales	Roseiflexaceae		NA	Rosales	Myrtaceae	Fagraea
bASV1795	d0920a99ad8deafa89855ca9c9c51827	Bacteria	0.0509181	-1712.66	-1714.59	0.0493763	0.207676	bASV1795|Xanthobacteraceae	Alphaproteobacteria	Rhizobiales	Xanthobacteraceae		NA	Fabales	Myrtaceae	Pandanus
bASV1976	ae03c0a8b2e98225e3a8c16026240fd2	Bacteria	0.0528998	-1739.99	-1742.49	0.0252059	0.143418	bASV1976|Alphaproteobacteria	Alphaproteobacteria				Others	Rosales	Moraceae	Alocasia
bASV2797	2229820a40c13f3ccc81dc5691185ea5	Bacteria	0.310853	-1666.96	-1669.92	0.0148923	0.105327	bASV2797|uncultured_Methylocystaceae	Alphaproteobacteria	Rhizobiales	Xanthobacteraceae		NA	NA	Urticaceae	Mycetia
bASV2649	f2bda170427d1dfee6c1d69b3c79e338	Bacteria	7.33137e-05	-1680.97	-1680.97	1	1	bASV2649|uncultured_bacterium	Chloroflexia	Chloroflexales	Chloroflexaceae	FFCH7168	NA	Rosales	Apocynaceae	Bauhinia
bASV1214	3966b16798985bef658bfabb9385cea1	Bacteria	7.33137e-05	-1739.17	-1739.17	1	1	bASV1214|Xanthobacteraceae	Alphaproteobacteria	Rhizobiales	Xanthobacteraceae		NA	NA	Lamiaceae	Alocasia
bASV1646	6c8e2d1415135705d4c74788e879c29f	Bacteria	0.0213775	-1719.81	-1720.55	0.224043	0.532655	bASV1646|uncultured_bacterium	Verrucomicrobiae	Pedosphaerales	Pedosphaeraceae	Pedosphaera	NA	Others	Poaceae	Horsfieldia
bASV522	aade186ad9980b72e0d3933f08291cd6	Bacteria	0.0510332	-1786.63	-1788.29	0.0678931	0.252802	bASV522|Novosphingobium	Alphaproteobacteria	Sphingomonadales	Sphingomonadaceae	Novosphingobium	NA	Myrtales	Myrtaceae	NA
bASV1519	ded6576d690bb6d2ad2f29c4e4354f62	Bacteria	0.0347421	-1740.99	-1741.78	0.210503	0.513482	bASV1519|Beijerinckiaceae	Alphaproteobacteria	Rhizobiales	Beijerinckiaceae		Pinopsida	Malvales	Poaceae	Lagerstroemia
bASV356	48a9951d9e596593da936436efe1eccf	Bacteria	0.0200455	-1779.81	-1780.32	0.3148	0.672069	bASV356|Gaiellales	Thermoleophilia	Gaiellales			NA	Lamiales	Myrtaceae	Fagraea
bASV1811	e98fe0a9e4bd7ad2f89149228dafb303	Bacteria	0.0508225	-1735.36	-1736.6	0.115765	0.359211	bASV1811|Subgroup_5	Subgroup_5	Subgroup_5	Subgroup_5	Subgroup_5	NA	Myrtales	Urticaceae	NA
bASV1336	76f63a34da5802bb599b742b0139acfd	Bacteria	7.33137e-05	-1739.94	-1739.94	1	1	bASV1336|Gaiella	Thermoleophilia	Gaiellales	Gaiellaceae	Gaiella	NA	Arecales	Myrtaceae	Fagraea
bASV836	82c0ed6c2d82c30af91daafe42c281fb	Bacteria	0.115637	-1778.59	-1780.17	0.0752955	0.271609	bASV836|Lysobacter	Gammaproteobacteria	Xanthomonadales	Xanthomonadaceae	Lysobacter	NA	Arecales	Myrtaceae	Brassaiopsis
bASV1857	8ddfa3e5cc5e22bb83944c88e6cd4c91	Bacteria	7.33137e-05	-1733.34	-1733.33	1	1	bASV1857|Pseudonocardia	Actinobacteria	Pseudonocardiales	Pseudonocardiaceae	Pseudonocardia	NA	NA	Arecaceae	Fagraea
bASV481	670b8109566aadd4a1662dc171b362b0	Bacteria	0.031939	-1761.27	-1762.73	0.0875214	0.298137	bASV481|Ramlibacter_sp.	Gammaproteobacteria	Burkholderiales	Comamonadaceae	Ramlibacter	NA	Myrtales	Myrtaceae	Bauhinia
bASV994	614bcb9695b1a92f46247e66b185a815	Bacteria	7.33137e-05	-1758.01	-1758	1	1	bASV994|Amycolatopsis	Actinobacteria	Pseudonocardiales	Pseudonocardiaceae	Amycolatopsis	NA	NA	Poaceae	NA
bASV1	a91b69f242cda15c0d363b682c7e9c3e	Bacteria	0.140153	-1185	-1187.48	0.0259525	0.145425	bASV1|Pseudomonas	Gammaproteobacteria	Pseudomonadales	Pseudomonadaceae	Pseudomonas	NA	NA	Acanthaceae	NA
bASV1465	b13e5d3c660492c9397ecb17181d2a5f	Bacteria	0.0549217	-1706.56	-1708.73	0.0375131	0.17557	bASV1465|Subgroup_10	Thermoanaerobaculia	Thermoanaerobaculales	Thermoanaerobaculaceae	Subgroup_10	NA	Rosales	Moraceae	Fagraea
bASV1193	0a72b2463bf0b256eb097f956cb7e332	Bacteria	7.33137e-05	-1724.38	-1724.38	1	1	bASV1193|uncultured_Holophaga	Acidobacteriae	Subgroup_2	Subgroup_2	Subgroup_2	Others	Others	Poaceae	Lagerstroemia
bASV69	e8a3f0e68e05d5ec4932b8d1b012d659	Bacteria	7.33137e-05	-1763.55	-1763.55	1	1	bASV69|Comamonadaceae	Gammaproteobacteria	Burkholderiales	Comamonadaceae		NA	NA	Acanthaceae	NA
bASV36	8425e78d58de68696718eb6d1bce4138	Bacteria	0.0128222	-1775.55	-1776	0.345095	0.715581	bASV36|Enterobacteriaceae	Gammaproteobacteria	Enterobacterales	Enterobacteriaceae		NA	NA	NA	Polyalthia
bASV107	b754fb653c9af33be64061c01a2cf39e	Bacteria	7.33137e-05	-1756.92	-1756.92	1	1	bASV107|Pseudomonas	Gammaproteobacteria	Pseudomonadales	Pseudomonadaceae	Pseudomonas	NA	NA	Asteraceae	NA
bASV625	dd4ffa7296205e41bc7af4b47a7123ae	Bacteria	0.0613837	-1792.46	-1794.29	0.0559738	0.227124	bASV625|uncultured_bacterium	Thermoleophilia	Solirubrobacterales	67-14	67-14	NA	Arecales	Myrtaceae	Bauhinia
bASV6919	b3777f48804d3a20c69c34233298b3b7	Bacteria	0.0652556	-1612.42	-1613.82	0.0949128	0.315794	bASV6919|uncultured_bacterium	Alphaproteobacteria	Acetobacterales	Acetobacteraceae	Roseomonas	NA	Myrtales	NA	Alocasia
bASV720	ba006aa56940fe5778ab8a67be01b347	Bacteria	0.047176	-1737.92	-1740.07	0.0379219	0.176504	bASV720|Roseiflexaceae	Chloroflexia	Chloroflexales	Roseiflexaceae		NA	Arecales	Arecaceae	Fagraea
bASV1552	08c0e614fca4855380b8128078755585	Bacteria	0.0670624	-1754.82	-1756.86	0.0436353	0.192574	bASV1552|Ramlibacter	Gammaproteobacteria	Burkholderiales	Comamonadaceae	Ramlibacter	NA	Arecales	Myrtaceae	Fagraea
bASV4402	d1515ab847d92a42fd7febc1e33f47a5	Bacteria	7.33137e-05	-1647.47	-1647.46	1	1	bASV4402|uncultured_proteobacterium	Subgroup_22	Subgroup_22	Subgroup_22	Subgroup_22	NA	Arecales	Myrtaceae	Prunus
bASV2989	d52bdd8bd0a9781c50c640271683529b	Bacteria	7.33137e-05	-1651.03	-1651.03	1	1	bASV2989|MND1	Gammaproteobacteria	Burkholderiales	Nitrosomonadaceae	MND1	NA	Arecales	Arecaceae	Caryota
bASV913	ef5d1dd607af37a48551a7a0eeb707fb	Bacteria	0.254018	-1722.93	-1727.58	0.00231243	0.0354852	bASV913|uncultured_Conexibacteraceae	Thermoleophilia	Solirubrobacterales	Solirubrobacteraceae		Others	Malvales	Poaceae	Horsfieldia
bASV1151	a62e4e2cb15420d7604b470989dc48be	Bacteria	0.0316281	-1724.32	-1725.05	0.228248	0.539574	bASV1151|Agromyces	Actinobacteria	Micrococcales	Microbacteriaceae	Agromyces	NA	Myrtales	Asteraceae	Bauhinia
bASV91	d89d0d2ba06be4e7c3f678b2c28e1f1e	Bacteria	0.0497756	-1756.24	-1757.52	0.109978	0.346349	bASV91|Cupriavidus	Gammaproteobacteria	Burkholderiales	Burkholderiaceae	Cupriavidus	NA	NA	NA	NA
bASV3464	7a76ed4902a67de92d777585493e62dd	Bacteria	0.091503	-1667.41	-1671.98	0.0025205	0.0367266	bASV3464|Halieaceae	Gammaproteobacteria	Cellvibrionales	Halieaceae		NA	Myrtales	Myrtaceae	Fagraea
bASV1221	b48e3afaba8ec9a25666e4b71ffe1c09	Bacteria	0.420228	-1701.25	-1709.96	2.98364e-05	0.00269807	bASV1221|Xanthobacteraceae	Alphaproteobacteria	Rhizobiales	Xanthobacteraceae		NA	Lamiales	Urticaceae	Mycetia
bASV1780	9417e7d21428d1c44e3a4ef68d035c70	Bacteria	0.0874332	-1730.76	-1733.39	0.021859	0.132125	bASV1780|Microtrichales	Acidimicrobiia	Microtrichales			NA	Arecales	Urticaceae	Dypsis
bASV139	dcda8a4cce949599c33383ef80063872	Bacteria	0.0616684	-1772.52	-1774.09	0.0762751	0.273553	bASV139|67-14	Thermoleophilia	Solirubrobacterales	67-14	67-14	NA	Lamiales	Acanthaceae	Fagraea
bASV3666	5cf535a9c1b96d8093c7ea41082f15a4	Bacteria	0.114503	-1676.52	-1680.75	0.00362573	0.0459017	bASV3666|Mycobacterium	Actinobacteria	Corynebacteriales	Mycobacteriaceae	Mycobacterium	NA	Lamiales	Acanthaceae	Mycetia
bASV2066	0d474ff0c98e24e774dfcbf772ae3bf4	Bacteria	7.33137e-05	-1676.65	-1676.64	1	1	bASV2066|Paenibacillus_aceris	Bacilli	Paenibacillales	Paenibacillaceae	Paenibacillus	NA	NA	NA	Begonia
bASV746	cf55f03b6de3c859f3ffaa45407f4550	Bacteria	7.33137e-05	-1784.35	-1784.35	1	1	bASV746|uncultured_actinobacterium	Thermoleophilia	Solirubrobacterales	67-14	67-14	NA	Lamiales	Lamiaceae	Fagraea
bASV1802	8630322d345e5baadedca70095b050d1	Bacteria	7.33137e-05	-1740.62	-1740.61	1	1	bASV1802|Xanthobacteraceae	Alphaproteobacteria	Rhizobiales	Xanthobacteraceae		NA	NA	Asteraceae	Alocasia
bASV889	772ae015505aa826c6ef11e1e1edfce9	Bacteria	7.33137e-05	-1748.26	-1748.25	1	1	bASV889|Gaiella	Thermoleophilia	Gaiellales	Gaiellaceae	Gaiella	NA	NA	Urticaceae	NA
bASV4579	b7f681401e6c20575b681f4f5b6d6c7b	Bacteria	0.0636794	-1663.72	-1664.81	0.139667	0.402317	bASV4579|uncultured_Desulfuromonadaceae	NB1-j	NB1-j	NB1-j	NB1-j	NA	Rosales	Moraceae	Alocasia
bASV1380	11de94c22c28fe329ab0943b50469f05	Bacteria	7.33137e-05	-1733.35	-1733.35	1	1	bASV1380|Alphaproteobacteria	Alphaproteobacteria				Polypodiopsida	Malvales	Lamiaceae	Lagerstroemia
bASV1088	7bd6da9eb7ef3b8cfde82c839bda25be	Bacteria	0.0827869	-1754.29	-1759.19	0.00173687	0.0301155	bASV1088|uncultured_bacterium	Polyangia	Polyangiales	Sandaracinaceae		NA	Arecales	Acanthaceae	Fagraea
bASV969	eabd5314dca6c0072f709c8e739deb33	Bacteria	7.33137e-05	-1765.58	-1765.58	1	1	bASV969|uncultured_Chloroflexi	TK10	TK10	TK10	TK10	NA	Arecales	Phyllanthaceae	Bauhinia
bASV2332	761b74dd8bb9504c7341dcd768e65a3d	Bacteria	7.33137e-05	-1714.1	-1714.1	1	1	bASV2332|uncultured_bacterium	Acidobacteriae	Subgroup_2	Subgroup_2	Subgroup_2	NA	Arecales	Poaceae	Excoecaria
bASV2524	240998ca18c5de5b762e93f2cbdc0240	Bacteria	7.33137e-05	-1730.7	-1730.69	1	1	bASV2524|Solirubrobacter	Thermoleophilia	Solirubrobacterales	Solirubrobacteraceae	Solirubrobacter	NA	NA	NA	NA
bASV950	3615d40420b6fa9d3071763fccfc7548	Bacteria	0.018671	-1771.58	-1771.84	0.466649	0.876278	bASV950|uncultured_Verrucomicrobia	Verrucomicrobiae	Pedosphaerales	Pedosphaeraceae	ADurb.Bin063-1	NA	Others	Poaceae	Lagerstroemia
bASV2209	ec099cf49cce94f5f44dcf3927fdc88a	Bacteria	0.0133018	-1652.08	-1652.3	0.502938	0.916142	bASV2209|uncultured_Acidimicrobiales	Acidimicrobiia	Microtrichales	Iamiaceae	Iamia	NA	NA	Araceae	Alocasia
bASV42	c95900447d0227492e9f3b075b723b5e	Bacteria	7.33137e-05	-1808.99	-1808.99	1	1	bASV42|Roseateles_depolymerans	Gammaproteobacteria	Burkholderiales	Comamonadaceae	Roseateles	Others	Asparagales	Acanthaceae	Brassaiopsis
bASV3281	b4fbfd78c44d72afd8c1873c1b07e59c	Bacteria	0.0410223	-1642.83	-1643.8	0.164536	0.444616	bASV3281|uncultured_prokaryote	Acidobacteriae	Bryobacterales	Bryobacteraceae	Bryobacter	NA	Arecales	Malvaceae	Duranta
bASV417	0e5b8af13895cea77f6362d3afccabae	Bacteria	0.127973	-1792.63	-1797.53	0.00174512	0.0301155	bASV417|uncultured_bacterium	TK10	TK10	TK10	TK10	NA	Arecales	Meliaceae	Pandanus
bASV1101	02487c688a41a86ae87111f9fec09181	Bacteria	0.0366992	-1737.61	-1738.25	0.257058	0.582696	bASV1101|uncultured_bacterium	Verrucomicrobiae	Pedosphaerales	Pedosphaeraceae	Ellin516	NA	Malvales	Poaceae	Horsfieldia
bASV1479	bde0e7810665de5d5eb908d667838b8c	Bacteria	0.0145898	-1768.63	-1768.7	0.714252	1	bASV1479|uncultured_bacterium	Alphaproteobacteria	Reyranellales	Reyranellaceae		Pinopsida	Myrtales	Myrtaceae	Codiaeum
bASV6226	222228eb9b1961c3ce4464ed733e563f	Bacteria	0.0244182	-1636.67	-1637.25	0.281534	0.616707	bASV6226|Bacteria					NA	Myrtales	Myrtaceae	Alocasia
bASV3070	2ccaf844a9e8b7e702f22a93da69152d	Bacteria	7.33137e-05	-1689.68	-1689.68	1	1	bASV3070|Sphingomonadaceae	Alphaproteobacteria	Sphingomonadales	Sphingomonadaceae		NA	Gentianales	Myrtaceae	Alocasia
bASV744	6b9c14a7092c9f791d98e9e3ef3cce53	Bacteria	0.0227812	-1782.27	-1782.41	0.594936	1	bASV744|Pedomicrobium	Alphaproteobacteria	Rhizobiales	Hyphomicrobiaceae	Pedomicrobium	NA	NA	Urticaceae	Musa
bASV2386	302de62f538410f92ecc395589c1617f	Bacteria	0.00594624	-1673.78	-1673.83	0.739657	1	bASV2386|Fimbriimonadaceae	Fimbriimonadia	Fimbriimonadales	Fimbriimonadaceae	Fimbriimonadaceae	NA	NA	Urticaceae	Mycetia
bASV3473	5d29f54c354294ddeb7e8f20f25cf556	Bacteria	7.33137e-05	-1665.43	-1665.43	1	1	bASV3473|Nocardiaceae	Actinobacteria	Corynebacteriales	Nocardiaceae		NA	Arecales	Lamiaceae	Fagraea
bASV96	6a828476b35a0d5773dea1ed94833576	Bacteria	7.33137e-05	-1842.27	-1842.27	1	1	bASV96|Bacillus	Bacilli	Bacillales	Bacillaceae	Bacillus	NA	NA	Urticaceae	Brassaiopsis
bASV4622	c4902695d542744d559c7b5ef0193e4e	Bacteria	0.0233119	-1672.88	-1673.57	0.242032	0.56274	bASV4622|uncultured_Polyangiaceae	Polyangia	mle1-27	mle1-27	mle1-27	NA	Lamiales	Lamiaceae	Horsfieldia
bASV590	967feba84879929f13dad3475be8e889	Bacteria	0.0312319	-1790.29	-1790.58	0.447211	0.85395	bASV590|Nocardioides	Actinobacteria	Propionibacteriales	Nocardioidaceae	Nocardioides	NA	Lamiales	Lamiaceae	Fagraea
bASV4385	229e247ab8ff20345ba1fe3359e08ef0	Bacteria	0.0182736	-1630.26	-1630.52	0.471688	0.877143	bASV4385|Pedosphaeraceae	Verrucomicrobiae	Pedosphaerales	Pedosphaeraceae		NA	Arecales	Myrtaceae	Pandanus
bASV215	fd3cf8e7507fb132ae83819d0be66a73	Bacteria	0.0444509	-1766.86	-1767.54	0.243686	0.564653	bASV215|Flavobacterium	Bacteroidia	Flavobacteriales	Flavobacteriaceae	Flavobacterium	NA	NA	Araceae	NA
bASV2135	246aaa75588f9bec9258e0c6e453b0da	Bacteria	0.128994	-1720.26	-1721.85	0.0744208	0.269962	bASV2135|uncultured_bacterium	Thermoleophilia	Solirubrobacterales	Solirubrobacteraceae	Solirubrobacter	NA	Arecales	Phyllanthaceae	Fagraea
bASV3450	09f62347aa3a4b1b9d9c6c22ea3bdee2	Bacteria	7.33137e-05	-1624.16	-1624.16	1	1	bASV3450|MND1	Gammaproteobacteria	Burkholderiales	Nitrosomonadaceae	MND1	NA	Arecales	Myrtaceae	Fagraea
bASV26	598466156fea3b9ccd6bb9cd2ccf79b3	Bacteria	0.120082	-1759.75	-1761.21	0.0875167	0.298137	bASV26|Methyloligellaceae	Alphaproteobacteria	Rhizobiales	Methyloligellaceae		NA	Sapindales	Urticaceae	Fagraea
bASV269	9179473c7b3c95da7f9126656cd4175d	Bacteria	7.33137e-05	-1820.38	-1820.38	1	1	bASV269|Xanthobacteraceae	Alphaproteobacteria	Rhizobiales	Xanthobacteraceae		Others	Others	Lamiaceae	Horsfieldia
bASV1305	c2cee703005a8529eb10fb3f42e8241a	Bacteria	0.0954543	-1777.6	-1778.83	0.116747	0.359988	bASV1305|Subgroup_5	Subgroup_5	Subgroup_5	Subgroup_5	Subgroup_5	Polypodiopsida	Others	Urticaceae	Horsfieldia
bASV3007	6d53de061c6c6ea8c7b1fcd097c834e0	Bacteria	7.33137e-05	-1671.25	-1671.24	1	1	bASV3007|uncultured_soil	Holophagae	Subgroup_7	Subgroup_7	Subgroup_7	NA	Rosales	Moraceae	Alocasia
bASV833	2b91d0e403e6a530953fd6654af9afed	Bacteria	0.0429897	-1773.98	-1774.65	0.244795	0.566088	bASV833|Gemmatimonas	Gemmatimonadetes	Gemmatimonadales	Gemmatimonadaceae	Gemmatimonas	Polypodiopsida	Others	Urticaceae	Musa
bASV19	30edf8a331accc647f746969515f0509	Bacteria	7.33137e-05	-1619.47	-1619.47	1	1	bASV19|Stenotrophomonas	Gammaproteobacteria	Xanthomonadales	Xanthomonadaceae	Stenotrophomonas	NA	NA	Asteraceae	Excoecaria
bASV899	d4925fe07daf42ad80282a316095c06e	Bacteria	0.0150245	-1714.73	-1715.1	0.390208	0.773695	bASV899|Rhodanobacteraceae	Gammaproteobacteria	Xanthomonadales	Rhodanobacteraceae		NA	Asparagales	Urticaceae	Mycetia
bASV1968	26534be13433412c5e0ffc0a5cdd90fa	Bacteria	0.0676068	-1734.97	-1739.2	0.0036171	0.0459017	bASV1968|Microtrichales	Acidimicrobiia	Microtrichales			NA	Lamiales	Moraceae	Alocasia
bASV1995	b664eb0240dce7912e70cc3c830bb817	Bacteria	7.33137e-05	-1733.43	-1733.42	1	1	bASV1995|Ellin6067	Gammaproteobacteria	Burkholderiales	Nitrosomonadaceae	Ellin6067	NA	Arecales	Lamiaceae	NA
bASV2326	05b8eca2cb9f84c45b784ca4fa1d0a26	Bacteria	0.150347	-1684.12	-1684.91	0.208709	0.51058	bASV2326|TK10	TK10	TK10	TK10	TK10	Others	Malvales	Poaceae	Musa
bASV2944	d3f1595cc83bc8491ddb3ce2834f2875	Bacteria	0.00489692	-1697.4	-1697.41	0.877139	1	bASV2944|uncultured_bacterium	Alphaproteobacteria	Rhizobiales	Rhizobiales_Incertae_Sedis	Nordella	NA	Arecales	Urticaceae	NA
bASV1011	9ceebabe472575c0ba824a01fdab01c8	Bacteria	0.0431921	-1784.62	-1785.27	0.254554	0.579333	bASV1011|Rhizobiales_bacterium	Alphaproteobacteria	Rhizobiales	Xanthobacteraceae	Xanthobacteraceae	NA	Others	Lamiaceae	Musa
bASV2211	a60b00b876106e26bbd068c2ef90e119	Bacteria	7.33137e-05	-1740.58	-1740.58	1	1	bASV2211|metagenome	Bacteroidia	Sphingobacteriales	AKYH767	AKYH767	NA	NA	Urticaceae	Begonia
bASV526	7f6ae54e6583bca8ecaab602d0687d24	Bacteria	7.33137e-05	-1782.15	-1782.14	1	1	bASV526|Solirubrobacteraceae	Thermoleophilia	Solirubrobacterales	Solirubrobacteraceae		NA	NA	Poaceae	Horsfieldia
bASV905	231055f13b2a0c41e610c4ba372ce3f5	Bacteria	0.0742764	-1716.62	-1718.9	0.0324479	0.166312	bASV905|Oxalobacteraceae	Gammaproteobacteria	Burkholderiales	Oxalobacteraceae		NA	Arecales	Arecaceae	Brassaiopsis
bASV1503	f013264359ad161a087ac5f35093177a	Bacteria	0.0900983	-1742.2	-1750.29	5.76683e-05	0.00429459	bASV1503|Paludibaculum	Acidobacteriae	Acidobacteriae	Acidobacteriae	Paludibaculum	NA	Myrtales	Myrtaceae	Fagraea
bASV2197	1142e31019a47a2370b9cc078e4fa0d2	Bacteria	0.124712	-1733.04	-1734.31	0.109865	0.346349	bASV2197|AKYH767	Bacteroidia	Sphingobacteriales	AKYH767	AKYH767	NA	Gentianales	Urticaceae	Fagraea
bASV1230	7f616a32729afb85807cdadf9850c938	Bacteria	0.0323184	-1763.53	-1763.91	0.382137	0.763486	bASV1230|Pedosphaeraceae	Verrucomicrobiae	Pedosphaerales	Pedosphaeraceae		NA	Rosales	Urticaceae	NA
bASV1579	f63d54347b710fa61547dbc1f7cbfc3b	Bacteria	7.33137e-05	-1694.31	-1694.31	1	1	bASV1579|Rhizobiaceae	Alphaproteobacteria	Rhizobiales	Rhizobiaceae		NA	NA	Asteraceae	Brassaiopsis
bASV457	2a34b96c6100c9b02aee7ece189f69da	Bacteria	7.33137e-05	-1771.54	-1771.53	1	1	bASV457|Sphingomonas	Alphaproteobacteria	Sphingomonadales	Sphingomonadaceae	Sphingomonas	NA	Arecales	Arecaceae	Fagraea
bASV1166	900210f6c3953c0f5a906f20536b3524	Bacteria	0.0443788	-1737.22	-1739.08	0.0536742	0.219553	bASV1166|Rhodopseudomonas	Alphaproteobacteria	Rhizobiales	Xanthobacteraceae	Rhodopseudomonas	NA	NA	Araceae	Brassaiopsis
bASV3974	1af61e7b88953ccb28149a86dbb9ec2a	Bacteria	0.00995093	-1623.52	-1623.58	0.743085	1	bASV3974|uncultured_Alphaproteobacteria	Alphaproteobacteria	Rhizobiales	Xanthobacteraceae	Rhodoplanes	NA	Arecales	Phyllanthaceae	Fagraea
bASV137	6c7a9dbf29a337d0a9f16ac8abdfd50a	Bacteria	0.0532645	-1807.94	-1808.87	0.171728	0.452271	bASV137|Nocardioides	Actinobacteria	Propionibacteriales	Nocardioidaceae	Nocardioides	Magnoliopsida	Lamiales	Lamiaceae	Alocasia
bASV1744	59e605a0312204cbe880915ebdcd49e4	Bacteria	7.33137e-05	-1751.2	-1751.2	1	1	bASV1744|uncultured_bacterium	MB-A2-108	MB-A2-108	MB-A2-108	MB-A2-108	NA	NA	Urticaceae	Mycetia
bASV23	c4c8e63bc7dfae18aff9954821f5e194	Bacteria	0.034478	-1707.22	-1707.55	0.416074	0.808518	bASV23|Sphingomonas	Alphaproteobacteria	Sphingomonadales	Sphingomonadaceae	Sphingomonas	NA	Arecales	Myrtaceae	Alocasia
bASV192	ece5a5e018744ec6afa212ef87a3efcd	Bacteria	0.068596	-1826.17	-1826.76	0.280833	0.616707	bASV192|uncultured_bacterium	Actinobacteria	Frankiales	Acidothermaceae	Acidothermus	NA	Lamiales	Urticaceae	Musa
bASV159	4efd26bc149aee8bde1c63cb8c60fc17	Bacteria	0.0310718	-1694.4	-1697.59	0.0116283	0.0896378	bASV159|Comamonadaceae	Gammaproteobacteria	Burkholderiales	Comamonadaceae		NA	Lamiales	Urticaceae	NA
bASV855	7339fa9cea62791e8725f517bd033b05	Bacteria	7.33137e-05	-1769.01	-1769	1	1	bASV855|Comamonadaceae	Gammaproteobacteria	Burkholderiales	Comamonadaceae		Others	Malvales	Poaceae	Rhaphidophora
bASV216	ebcf6bd288078a17d66f6cba4d60d037	Bacteria	0.0700782	-1750.1	-1751.54	0.0895313	0.302661	bASV216|Cupriavidus	Gammaproteobacteria	Burkholderiales	Burkholderiaceae	Cupriavidus	NA	Myrtales	Myrtaceae	Prunus
bASV337	17f50a58d569edcc743bb72ea0d1bcb3	Bacteria	7.33137e-05	-1691.39	-1691.39	1	1	bASV337|Marmoricola	Actinobacteria	Propionibacteriales	Nocardioidaceae	Marmoricola	NA	NA	Acanthaceae	NA
bASV129	53807fbfa100cb8cb4f0556df1b34c93	Bacteria	0.0732553	-1826.08	-1827.88	0.0576716	0.231417	bASV129|Sphingomonas	Alphaproteobacteria	Sphingomonadales	Sphingomonadaceae	Sphingomonas	NA	Myrtales	Myrtaceae	Brassaiopsis
bASV18	c392ceb6309d70d6305c9262d8a0d466	Bacteria	0.0060656	-1589.91	-1590.18	0.462738	0.87247	bASV18|Comamonas_testosteroni	Gammaproteobacteria	Burkholderiales	Comamonadaceae	Comamonas	Others	NA	NA	Podocarpus
bASV162	826d701b519aed5baa3c5fb1f323320c	Bacteria	7.33137e-05	-1791.79	-1791.79	1	1	bASV162|Pseudomonas_nitroreducens	Gammaproteobacteria	Pseudomonadales	Pseudomonadaceae	Pseudomonas	NA	NA	NA	NA
bASV2013	bc16c14698c81eebd25fd396fee8ab7f	Bacteria	0.0337236	-1708.78	-1709.76	0.162052	0.440726	bASV2013|uncultured_bacterium	Thermoleophilia	Gaiellales	Gaiellaceae	Gaiella	NA	Arecales	Myrtaceae	Fagraea
bASV2746	e08cb8655e4b5b5fb5d83eb34048047e	Bacteria	0.0290419	-1646.71	-1647.63	0.174599	0.456698	bASV2746|Microtrichales	Acidimicrobiia	Microtrichales			Liliopsida	Asparagales	Poaceae	NA
bASV1810	966bd7c12c82374655536dd3b7f6c553	Bacteria	0.0294282	-1657.32	-1658.07	0.220819	0.528462	bASV1810|Brevibacterium_casei	Actinobacteria	Micrococcales	Brevibacteriaceae	Brevibacterium	NA	Arecales	Poaceae	NA
bASV44	d9a1eab27dd6d5029e87b8284f88783d	Bacteria	0.00582068	-1833.07	-1833.1	0.797171	1	bASV44|Pseudomonas	Gammaproteobacteria	Pseudomonadales	Pseudomonadaceae	Pseudomonas	NA	Rosales	Acanthaceae	Codiaeum
bASV1185	c05c56609be8e355b4a419b2ab4e6e70	Bacteria	0.0505728	-1703.8	-1704.29	0.319322	0.675457	bASV1185|Bradyrhizobium	Alphaproteobacteria	Rhizobiales	Xanthobacteraceae	Bradyrhizobium	Polypodiopsida	Others	Poaceae	Musa
bASV2395	a7c8a1f9219fd1e1d55e33d7586867f3	Bacteria	0.0106794	-1715.84	-1716.14	0.437709	0.839605	bASV2395|uncultured_Alphaproteobacteria	Alphaproteobacteria	Azospirillales	Inquilinaceae	Inquilinus	Pinopsida	Malvales	Poaceae	Horsfieldia
bASV582	f56bdb82c494e782adea99854fcc9b0e	Bacteria	7.33137e-05	-1809.62	-1809.62	1	1	bASV582|Gaiellales	Thermoleophilia	Gaiellales			Pinopsida	Malpighiales	Myrtaceae	Bauhinia
bASV3189	2062084633a373ed676ed842cbd28a54	Bacteria	0.0388741	-1683.58	-1684.32	0.224319	0.53281	bASV3189|Enterobacterales	Gammaproteobacteria	Enterobacterales			NA	NA	Asparagaceae	Lagerstroemia
bASV2207	17da3166a74a63411f91ffbe0efbe0d2	Bacteria	0.0348382	-1710.66	-1711.72	0.14532	0.412964	bASV2207|Subgroup_25	Subgroup_25	Subgroup_25	Subgroup_25	Subgroup_25	Others	Sapindales	Myrtaceae	Alocasia
bASV1437	2530de0ae3ae4bbbf25ee2bf4ffabf75	Bacteria	0.00205914	-1772.43	-1772.45	0.883996	1	bASV1437|Microtrichales	Acidimicrobiia	Microtrichales			NA	Lamiales	Myrtaceae	Alocasia
bASV524	eb76ad08316c8b996dcae94cb3607a97	Bacteria	0.45439	-1745.13	-1757.76	5.0024e-07	0.000115146	bASV524|Pseudolabrys	Alphaproteobacteria	Rhizobiales	Xanthobacteraceae	Pseudolabrys	NA	Lamiales	Urticaceae	Mycetia
bASV2952	daad299c9cb8f1d3d8190b6195642c1b	Bacteria	0.0261805	-1698.58	-1698.92	0.413633	0.805629	bASV2952|uncultured_bacterium	Alphaproteobacteria	Rhizobiales	Hyphomicrobiaceae	Pedomicrobium	NA	Arecales	Zingiberaceae	Pterospermum
bASV2104	f368316575b01fe6dc12c6665e6e733a	Bacteria	0.0128964	-1688.79	-1689	0.516517	0.932826	bASV2104|uncultured_bacterium	Gammaproteobacteria	Burkholderiales	Nitrosomonadaceae	IS-44	NA	Rosales	Moraceae	Alocasia
bASV2838	972037e088ee9de79dfa889d2db3a40c	Bacteria	7.33137e-05	-1687.27	-1687.26	1	1	bASV2838|uncultured_Alphaproteobacteria	Alphaproteobacteria	Rhizobiales	Beijerinckiaceae	Methylovirgula	Others	Others	Zingiberaceae	NA
bASV2637	066bc385328746d562793ac7c34ff273	Bacteria	7.33137e-05	-1681.29	-1681.29	1	1	bASV2637|Microvirga	Alphaproteobacteria	Rhizobiales	Beijerinckiaceae	Microvirga	NA	NA	NA	Fagraea
bASV4060	ce490be0abacb7f867abf0b0ce36d625	Bacteria	0.0585192	-1710.67	-1712.54	0.0533	0.218375	bASV4060|uncultured_bacterium	Bdellovibrionia	Bdellovibrionales	Bdellovibrionaceae	OM27_clade	NA	Arecales	Myrtaceae	Mycetia
bASV1985	9b6347cb25730218ad5c458e6a918f49	Bacteria	7.33137e-05	-1707.19	-1707.18	1	1	bASV1985|uncultured_bacterium	Actinobacteria	Pseudonocardiales	Pseudonocardiaceae	Crossiella	NA	NA	Poaceae	Lagerstroemia
bASV1716	635febc210d7d8f813d9ce4f2a3f8c63	Bacteria	0.0315626	-1747.07	-1747.26	0.539321	0.956275	bASV1716|uncultured_bacterium	MB-A2-108	MB-A2-108	MB-A2-108	MB-A2-108	NA	Arecales	Acanthaceae	Fagraea
bASV4117	cce0c8571ff193e6c417b21fb7677070	Bacteria	0.0467675	-1657.22	-1658.45	0.116868	0.359988	bASV4117|uncultured_actinobacterium	Thermoleophilia	Solirubrobacterales	67-14	67-14	Magnoliopsida	Sapindales	Meliaceae	NA
bASV2758	99cee5d8a898885a96002503590c8ff5	Bacteria	0.0306279	-1672.39	-1673.33	0.169634	0.450048	bASV2758|Thermomonas	Gammaproteobacteria	Xanthomonadales	Xanthomonadaceae	Thermomonas	NA	Rosales	Myrtaceae	Alocasia
bASV1038	af362ec6fbb2053b7f03b7f4e05b2057	Bacteria	7.33137e-05	-1738.23	-1738.23	1	1	bASV1038|Xanthobacteraceae	Alphaproteobacteria	Rhizobiales	Xanthobacteraceae		NA	Lamiales	Apocynaceae	Fagraea
bASV1031	6788c26e0c16af32c055403e0a235210	Bacteria	0.146219	-1741.29	-1747.44	0.000455466	0.0140639	bASV1031|SC-I-84	Gammaproteobacteria	Burkholderiales	SC-I-84	SC-I-84	NA	Myrtales	Myrtaceae	Bauhinia
bASV3657	ac242e4be0c9aa89ffd2368bf080dd65	Bacteria	7.33137e-05	-1650.83	-1650.82	1	1	bASV3657|Paenibacillus	Bacilli	Paenibacillales	Paenibacillaceae	Paenibacillus	Polypodiopsida	Others	Poaceae	Mycetia
bASV257	6eadad784714219e6dbdba70f19a01c3	Bacteria	0.088632	-1800.98	-1804.53	0.00774503	0.071833	bASV257|Saprospiraceae	Bacteroidia	Chitinophagales	Saprospiraceae		NA	Myrtales	Myrtaceae	Fagraea
bASV6668	2ec2bd2ac25fcfc5722cca1d55605b7e	Bacteria	7.33137e-05	-1602.43	-1602.42	1	1	bASV6668|uncultured_bacterium	MB-A2-108	MB-A2-108	MB-A2-108	MB-A2-108	NA	Rosales	Moraceae	Alocasia
bASV592	c352e0e56b0e42810de83151bef06b2f	Bacteria	0.00829973	-1778.18	-1778.27	0.676197	1	bASV592|Gaiellales	Thermoleophilia	Gaiellales			NA	Arecales	Meliaceae	Bauhinia
bASV1756	9089b3fde0614f5687ad699606d99e26	Bacteria	7.33137e-05	-1698.58	-1698.58	1	1	bASV1756|uncultured_bacterium	Thermoleophilia	Solirubrobacterales	67-14	67-14	NA	Rosales	Lamiaceae	Alocasia
bASV1813	a0e87fa84cd56e61166ca3d4d95d7793	Bacteria	0.0330354	-1730.02	-1731.05	0.150955	0.421664	bASV1813|Chthoniobacter	Verrucomicrobiae	Chthoniobacterales	Chthoniobacteraceae	Chthoniobacter	NA	Gentianales	NA	Rhaphidophora
bASV784	28d852fb068a3e024362cc91aa67be85	Bacteria	0.0470186	-1777.75	-1778.1	0.401603	0.789486	bASV784|Rhizobiales	Alphaproteobacteria	Rhizobiales			NA	Rosales	Urticaceae	NA
bASV2002	a1c16b0cda5cbcc7fe1875086834d17e	Bacteria	7.33137e-05	-1740.54	-1740.54	1	1	bASV2002|Gaiellales	Thermoleophilia	Gaiellales			NA	NA	Lamiaceae	Fagraea
bASV1714	1df2659f5c40f85bf544315cc2a4c0dd	Bacteria	0.0446946	-1718.18	-1718.8	0.264776	0.593287	bASV1714|Mesorhizobium	Alphaproteobacteria	Rhizobiales	Rhizobiaceae	Mesorhizobium	NA	Arecales	Lamiaceae	Alocasia
bASV45	c50970695028048b10ecb2e7d043ac64	Bacteria	7.33137e-05	-1388.04	-1388.04	1	1	bASV45|Reyranella	Alphaproteobacteria	Reyranellales	Reyranellaceae	Reyranella	Others	Fabales	Urticaceae	Mycetia
bASV3670	31f14fbb3b47c448edd402fc1edaa7b4	Bacteria	0.0493292	-1662.16	-1663.3	0.13026	0.38351	bASV3670|Rhizobacter	Gammaproteobacteria	Burkholderiales	Comamonadaceae	Rhizobacter	NA	Myrtales	Malvaceae	Alocasia
bASV5191	283bcd8ae04a89e0c850d139746256b8	Bacteria	0.023182	-1618.62	-1618.87	0.474418	0.88002	bASV5191|Microtrichales	Acidimicrobiia	Microtrichales			NA	Gentianales	Apocynaceae	Brassaiopsis
bASV2527	d2f183751aeae4b0ecd6a990ec43da3d	Bacteria	0.00288712	-1657.34	-1657.37	0.808716	1	bASV2527|Ferruginibacter	Bacteroidia	Chitinophagales	Chitinophagaceae	Ferruginibacter	NA	NA	Acanthaceae	NA
bASV656	3f7187456b441a5fb4389c6bc928dc99	Bacteria	7.33137e-05	-1795.31	-1795.3	1	1	bASV656|Xanthobacteraceae	Alphaproteobacteria	Rhizobiales	Xanthobacteraceae		NA	Malvales	Poaceae	Horsfieldia
bASV167	f4f83c52b5e521cbf5064855d80cac01	Bacteria	0.0669142	-1826.6	-1827.39	0.209757	0.512154	bASV167|Arthrobacter	Actinobacteria	Micrococcales	Micrococcaceae	Arthrobacter	NA	Lamiales	Urticaceae	Mycetia
bASV1456	81cfb289a655f60cc4fd382f7b14f069	Bacteria	0.134353	-1740.88	-1745.92	0.00150869	0.0278013	bASV1456|Comamonas	Gammaproteobacteria	Burkholderiales	Comamonadaceae	Comamonas	NA	Rosales	Acanthaceae	Alocasia
bASV3185	71b89576c728dc0c8a05c2424034e44f	Bacteria	0.105366	-1695.29	-1696.7	0.0932141	0.310959	bASV3185|Gemmatimonas	Gemmatimonadetes	Gemmatimonadales	Gemmatimonadaceae	Gemmatimonas	NA	Lamiales	Acanthaceae	Begonia
bASV543	82103077f6bc65b48a4a83a814361256	Bacteria	7.33137e-05	-1752.31	-1752.31	1	1	bASV543|Shinella	Alphaproteobacteria	Rhizobiales	Rhizobiaceae	Shinella	NA	NA	Urticaceae	NA
bASV53	a94f60ca5ba976307ff06db36c610589	Bacteria	0.0382373	-1784.23	-1786.97	0.0191469	0.122734	bASV53|Lactococcus_lactis	Bacilli	Lactobacillales	Streptococcaceae	Lactococcus	NA	Gentianales	Acanthaceae	Fagraea
bASV1274	2a20d52bc0d30bb4d6542d1ffb7571ed	Bacteria	0.00905768	-1677.47	-1677.48	0.87451	1	bASV1274|Comamonadaceae	Gammaproteobacteria	Burkholderiales	Comamonadaceae		NA	NA	NA	NA
bASV1346	ce8d2b5b3b2582e89657b6095bf39e6f	Bacteria	0.0089763	-1743.52	-1743.56	0.790836	1	bASV1346|Streptomyces	Actinobacteria	Streptomycetales	Streptomycetaceae	Streptomyces	NA	NA	Myrtaceae	Caryota
bASV113	404007c7b07e031d0ead4589b8f37a77	Bacteria	7.33137e-05	-1745.47	-1745.47	1	1	bASV113|Agromyces	Actinobacteria	Micrococcales	Microbacteriaceae	Agromyces	Magnoliopsida	Fabales	Myrtaceae	Alocasia
bASV1140	944eabdb30122714988f8efa8b1fe57c	Bacteria	7.33137e-05	-1720.38	-1720.38	1	1	bASV1140|Flavobacterium_lindanitolerans	Bacteroidia	Flavobacteriales	Flavobacteriaceae	Flavobacterium	NA	Malpighiales	Myrtaceae	Alocasia
bASV976	9fee29ebfb5c1b740d2de5ca68c85f9c	Bacteria	0.419401	-1704.33	-1710.86	0.000301697	0.011315	bASV976|Mycobacterium	Actinobacteria	Corynebacteriales	Mycobacteriaceae	Mycobacterium	NA	NA	Urticaceae	Begonia
bASV1081	7bde45922454951b3a5a1ac5a370c33d	Bacteria	0.0035944	-1705.31	-1705.37	0.733551	1	bASV1081|Acidobacteriales	Acidobacteriae	Acidobacteriales			NA	Malvales	Poaceae	NA
bASV1493	fb586ae3594ad66b0c5b8e9f5c77355d	Bacteria	7.33137e-05	-1704.33	-1704.32	1	1	bASV1493|MB-A2-108	MB-A2-108	MB-A2-108	MB-A2-108	MB-A2-108	NA	Arecales	Arecaceae	Dypsis
bASV7360	36b14f2bef6e9fbc7fc316f6b549a598	Bacteria	7.33137e-05	-1633.04	-1633.04	1	1	bASV7360|OM190	OM190	OM190	OM190	OM190	NA	Arecales	Lamiaceae	Alocasia
bASV1289	df9d37cf2bfd44314c20f34efef03321	Bacteria	0.100741	-1704.35	-1706.59	0.0341668	0.170988	bASV1289|Pseudarthrobacter_defluvii	Actinobacteria	Micrococcales	Micrococcaceae	Pseudarthrobacter	NA	Arecales	Asteraceae	Bauhinia
bASV1262	739558df761dc676a0cb7330235d6d1a	Bacteria	7.33137e-05	-1768.27	-1768.26	1	1	bASV1262|uncultured_bacterium	Alphaproteobacteria	Rhizobiales	Rhizobiales_Incertae_Sedis	Bauldia	NA	Arecales	Urticaceae	Horsfieldia
bASV4174	8e524e12df04540ac308cb0980557649	Bacteria	0.0330137	-1629.14	-1629.92	0.212105	0.516394	bASV4174|Ramlibacter	Gammaproteobacteria	Burkholderiales	Comamonadaceae	Ramlibacter	NA	Arecales	Arecaceae	Dypsis
bASV1328	14ab84f2636307f4f2007d49c1b59c9f	Bacteria	0.0219938	-1739.2	-1739.85	0.254078	0.579333	bASV1328|uncultured_bacterium	Bacteroidia	Chitinophagales	Chitinophagaceae	Aurantisolimonas	NA	Myrtales	Myrtaceae	Fagraea
bASV1080	85cda66d308d2be9527334756feb2f15	Bacteria	0.02823	-1725.07	-1725.45	0.382648	0.763486	bASV1080|Streptacidiphilus_sp.	Actinobacteria	Streptomycetales	Streptomycetaceae	Streptacidiphilus	Others	Malvales	Poaceae	NA
bASV5185	084e45e33dcfa32e23b34a44a168a253	Bacteria	0.126963	-1632.06	-1633.9	0.0550383	0.224047	bASV5185|uncultured_bacterium	Alphaproteobacteria	Rhizobiales	Rhizobiales_Incertae_Sedis	Bauldia	NA	Arecales	Urticaceae	Dypsis
bASV1293	4a526771b68b49139543f48139a43da8	Bacteria	7.33137e-05	-1765.5	-1765.49	1	1	bASV1293|Labrys	Alphaproteobacteria	Rhizobiales	Labraceae	Labrys	NA	Malvales	Poaceae	Pterospermum
bASV3567	4e2978b57fc6874b95569f71d1b4059d	Bacteria	0.0792386	-1606.26	-1608.85	0.0230346	0.13627	bASV3567|Hyphomicrobium_denitrificans	Alphaproteobacteria	Rhizobiales	Hyphomicrobiaceae	Hyphomicrobium	Polypodiopsida	Others	Acanthaceae	Begonia
bASV980	5da872976aeb6861afb3a4908df347b4	Bacteria	0.12148	-1748.86	-1749.84	0.161827	0.440587	bASV980|metagenome	Alphaproteobacteria	Rhizobiales	Xanthobacteraceae		Magnoliopsida	Lamiales	Myrtaceae	Bauhinia
bASV860	39c8cd461e649d6062983154d8c82c8a	Bacteria	7.33137e-05	-1774.01	-1774	1	1	bASV860|uncultured_bacterium	Verrucomicrobiae	Pedosphaerales	Pedosphaeraceae	ADurb.Bin063-1	Polypodiopsida	NA	Poaceae	Musa
bASV931	071a5c9bdb8c08b9e44b84723e39f903	Bacteria	0.0270561	-1770.09	-1770.45	0.396337	0.783391	bASV931|Reyranella	Alphaproteobacteria	Reyranellales	Reyranellaceae	Reyranella	NA	NA	Myrtaceae	Alocasia
bASV2923	78770cb0be8535e0be0182c420ece0b3	Bacteria	0.0527729	-1689.76	-1691.03	0.111037	0.348661	bASV2923|metagenome	Acidimicrobiia	Microtrichales	Ilumatobacteraceae	CL500-29_marine_group	NA	Myrtales	NA	Fagraea
bASV3063	58e564d141c9d8c836777221a71a74c2	Bacteria	0.0144266	-1672.53	-1672.9	0.388349	0.771216	bASV3063|CCD24	Gammaproteobacteria	CCD24	CCD24	CCD24	NA	Malvales	Lamiaceae	Lagerstroemia
bASV1228	0c9676702a4489735d48a357d02f301f	Bacteria	0.0302446	-1745.95	-1746.33	0.378815	0.760032	bASV1228|Micropepsaceae	Alphaproteobacteria	Micropepsales	Micropepsaceae		Others	Malvales	Poaceae	Musa
bASV7818	28570191de50129d903668d15f91dd1e	Bacteria	0.239435	-1591.08	-1592.77	0.0660096	0.248677	bASV7818|Babeliales	Babeliae	Babeliales			NA	NA	NA	NA
bASV1821	908f5738ef58e335b445f35d88ee1d0d	Bacteria	0.038081	-1691.97	-1693.17	0.120282	0.366932	bASV1821|uncultured_bacterium	Alphaproteobacteria	Rhizobiales	Hyphomicrobiaceae	Hyphomicrobium	Others	Myrtales	Myrtaceae	Prunus
bASV1965	2829f12529c2fe114ec1381a8371e1d2	Bacteria	7.33137e-05	-1698.22	-1698.22	1	1	bASV1965|Clostridium_sensu_stricto_1	Clostridia	Clostridiales	Clostridiaceae	Clostridium_sensu_stricto_1	NA	Gentianales	Lamiaceae	Pandanus
bASV1931	df70baefca2cb6d392a675f63015edd5	Bacteria	0.027996	-1718.86	-1719.31	0.344473	0.714924	bASV1931|uncultured_delta	Polyangia	Polyangiales	BIrii41	BIrii41	NA	Arecales	Myrtaceae	Alocasia
bASV1696	a0a9cd16a201fe5fa3148ed2a570f895	Bacteria	0.13426	-1743.77	-1747.97	0.00372523	0.0464697	bASV1696|uncultured_Acidobacteria	Subgroup_5	Subgroup_5	Subgroup_5	Subgroup_5	NA	Arecales	Urticaceae	Mycetia
bASV1783	093bbf7d55c8e6b889c0b174e8446774	Bacteria	0.0932615	-1697.55	-1700.03	0.0258833	0.145425	bASV1783|uncultured_bacterium	Gammaproteobacteria	Xanthomonadales	Rhodanobacteraceae	Tahibacter	NA	Asparagales	Asteraceae	Alocasia
bASV1347	66490f511880f3ceca74cc7dbd7f6724	Bacteria	0.0316675	-1743.65	-1744.6	0.168527	0.449827	bASV1347|Intrasporangium	Actinobacteria	Micrococcales	Intrasporangiaceae	Intrasporangium	Pinopsida	Arecales	Poaceae	Lagerstroemia
bASV1416	82071f5cd7f225d5df5402641b99d5c7	Bacteria	0.0509587	-1711.34	-1712.02	0.245773	0.567272	bASV1416|uncultured_Acidobacteriaceae	Acidobacteriae	Acidobacteriales			Pinopsida	Arecales	Poaceae	Podocarpus
bASV2686	5ac7a0ab08de6c422ec120fbbb8abf71	Bacteria	0.0443483	-1722.07	-1724.89	0.0175456	0.118153	bASV2686|uncultured_Acidobacteria	Acidobacteriae	Solibacterales	Solibacteraceae	Candidatus_Solibacter	NA	Myrtales	Myrtaceae	Pandanus
bASV510	0086636106faf7e8e6c03fb9de6e46c3	Bacteria	0.0766656	-1800.97	-1800.74	1	1	bASV510|uncultured_Rubrobacteria	Thermoleophilia	Gaiellales	Gaiellaceae	Gaiella	NA	Lamiales	Acanthaceae	Mycetia
bASV3673	41bb092ebb57a38e5d2b9f9562527cdd	Bacteria	0.0379775	-1713.36	-1714.74	0.0970777	0.32047	bASV3673|EPR3968-O8a-Bc78	Gammaproteobacteria	EPR3968-O8a-Bc78	EPR3968-O8a-Bc78	EPR3968-O8a-Bc78	NA	Rosales	Myrtaceae	Alocasia
bASV985	06a9011ebf38e04f415175bf90074348	Bacteria	0.164227	-1728.43	-1730.12	0.0662942	0.248677	bASV985|Xanthobacteraceae	Alphaproteobacteria	Rhizobiales	Xanthobacteraceae		NA	Arecales	Urticaceae	Horsfieldia
bASV1529	371e07ca783bf8144862ba9d4b358434	Bacteria	0.0313714	-1770.26	-1770.29	0.802225	1	bASV1529|uncultured_Syntrophobacterales	bacteriap25	bacteriap25	bacteriap25	bacteriap25	NA	NA	NA	Alocasia
bASV49	43069c9e7098f84f60c41ea9639cc46c	Bacteria	7.33137e-05	-1527.14	-1527.14	1	1	bASV49|Streptomyces	Actinobacteria	Streptomycetales	Streptomycetaceae	Streptomyces	NA	Rosales	Araliaceae	Brassaiopsis
bASV1472	1c2c566efe5b59f2213bdbecfc5d6b57	Bacteria	0.00105112	-1703.43	-1703.43	0.935242	1	bASV1472|uncultured_Acidobacteria	Acidobacteriae	Subgroup_2	Subgroup_2	Subgroup_2	NA	Others	Poaceae	Lagerstroemia
bASV1523	548447c2d60d4c13c114dc9251a97cf6	Bacteria	0.0831878	-1724.62	-1725.45	0.196467	0.493017	bASV1523|Comamonadaceae	Gammaproteobacteria	Burkholderiales	Comamonadaceae		NA	Malpighiales	Urticaceae	Caryota
bASV5795	96a5b89237ded189195e1dde41a02cb0	Bacteria	0.0210469	-1647.65	-1648.07	0.361439	0.733892	bASV5795|KD3-10	Myxococcia	Myxococcales	Myxococcaceae	KD3-10	NA	Myrtales	Myrtaceae	Fagraea
bASV477	08e16460e3deaed0088c6c44c62fcab6	Bacteria	0.0572709	-1783.87	-1784.82	0.167981	0.449827	bASV477|Rhodanobacteraceae	Gammaproteobacteria	Xanthomonadales	Rhodanobacteraceae		Liliopsida	Asparagales	Poaceae	NA
bASV317	025ebf2f3781215343a0a19091bb8293	Bacteria	7.33137e-05	-1805.96	-1805.95	1	1	bASV317|uncultured_bacterium	Subgroup_5	Subgroup_5	Subgroup_5	Subgroup_5	NA	NA	Urticaceae	NA
bASV2346	1ef6f6fb6924b76f68670378a7cfc1bf	Bacteria	0.058848	-1737.22	-1740.1	0.0163514	0.11306	bASV2346|uncultured_Nannocystineae	Polyangia	Haliangiales	Haliangiaceae	Haliangium	NA	Asparagales	Moraceae	Brassaiopsis
bASV4072	127983e1dc49b8f772cb02d529c29bd9	Bacteria	0.0427306	-1676.27	-1678.44	0.0374503	0.17557	bASV4072|uncultured_bacterium	Alphaproteobacteria	Rhizobiales	Pleomorphomonadaceae	Chthonobacter	NA	Rosales	Acanthaceae	Alocasia
bASV7079	5ffb8047f53546aa706be2a3bb75409b	Bacteria	0.0150169	-1665.35	-1665.59	0.491537	0.902663	bASV7079|uncultured_prokaryote	Phycisphaerae	Phycisphaerales	Phycisphaeraceae	SM1A02	NA	Arecales	Myrtaceae	Pandanus
bASV471	61f5365a21a119e3dd9275206e9a4b48	Bacteria	0.0245768	-1815.59	-1816.31	0.232626	0.547405	bASV471|Acidimicrobiia	Acidimicrobiia				NA	Lamiales	Urticaceae	Dypsis
bASV2316	d9c7dd265a6d3443a3e2a19fa3e30728	Bacteria	0.0913304	-1742.75	-1743.51	0.219228	0.525648	bASV2316|uncultured_bacterium	Alphaproteobacteria	Rhizobiales	Rhizobiales_Incertae_Sedis	Nordella	NA	Arecales	Urticaceae	Mycetia
bASV4624	9d3bf56a981a8690edb1636fd9cf3efe	Bacteria	0.0687165	-1627.77	-1632.46	0.00218787	0.0337786	bASV4624|Phytoplasma_sp.	Thermoleophilia	Solirubrobacterales	Solirubrobacteraceae		NA	Gentianales	Apocynaceae	Fagraea
bASV752	52a25dbff9b61c83ca4c020954263272	Bacteria	0.00478826	-1777.08	-1777.09	0.902378	1	bASV752|Reyranella	Alphaproteobacteria	Reyranellales	Reyranellaceae	Reyranella	Others	Others	Urticaceae	Musa
bASV2827	f5cce24a0504345b44e85c920b5a26e2	Bacteria	0.013957	-1727.93	-1728	0.701624	1	bASV2827|uncultured_Acidobacteria	Thermoanaerobaculia	Thermoanaerobaculales	Thermoanaerobaculaceae	Subgroup_10	NA	Arecales	Lamiaceae	Clerodendrum
bASV914	f69950da11ad9c5088cc8504b5c40247	Bacteria	0.174052	-1777.56	-1779.5	0.0484441	0.205194	bASV914|Gemmatimonas	Gemmatimonadetes	Gemmatimonadales	Gemmatimonadaceae	Gemmatimonas	NA	Arecales	Arecaceae	Pandanus
bASV330	b554a1c2b88ec803f8e24967d3f8cdad	Bacteria	7.33137e-05	-1810.89	-1810.88	1	1	bASV330|Gaiella	Thermoleophilia	Gaiellales	Gaiellaceae	Gaiella	NA	Rosales	Myrtaceae	Alocasia
bASV1008	d7993c85c3997816e34399a3af876fc4	Bacteria	0.0487266	-1774.53	-1775.9	0.0978289	0.321275	bASV1008|uncultured_bacterium	Alphaproteobacteria	Rhodobacterales	Rhodobacteraceae	Amaricoccus	NA	Myrtales	Myrtaceae	Alocasia
bASV3702	8ebca917a5f81596009e543dcfd9d902	Bacteria	0.0922393	-1661.7	-1662.5	0.205807	0.507403	bASV3702|uncultured_bacterium	Alphaproteobacteria	Rhizobiales	Beijerinckiaceae	Roseiarcus	NA	Arecales	Urticaceae	Pterospermum
bASV2840	eec304c7da0c8bcc9f4fa09aa3faf001	Bacteria	0.0926077	-1683.34	-1686.63	0.0102754	0.0841986	bASV2840|uncultured_beta	Gammaproteobacteria	Burkholderiales	Nitrosomonadaceae	mle1-7	NA	Myrtales	Myrtaceae	Syzygium
bASV334	429db139945c4b282ae48ebb17cdda8b	Bacteria	4.16263e-05	-1658.14	-1658.14	1	1	bASV334|Escherichia-Shigella	Gammaproteobacteria	Enterobacterales	Enterobacteriaceae	Escherichia-Shigella	NA	NA	NA	NA
bASV1392	e23ed6021138bea07913997e81fb0d40	Bacteria	7.33137e-05	-1694.62	-1694.61	1	1	bASV1392|Methylophilaceae	Gammaproteobacteria	Burkholderiales	Methylophilaceae		Others	NA	Asteraceae	Alocasia
bASV900	b4eb3ba8cedf6b5a656a20e5dda6d996	Bacteria	0.0447051	-1771.63	-1772.45	0.201559	0.502804	bASV900|uncultured_Desulfoglaeba	NB1-j	NB1-j	NB1-j	NB1-j	NA	Malpighiales	Myrtaceae	Brassaiopsis
bASV194	37ff8bc5a58c9e15bf5cffb4db4d5066	Bacteria	0.0664864	-1777.13	-1777.21	0.672282	1	bASV194|Streptomyces	Actinobacteria	Streptomycetales	Streptomycetaceae	Streptomyces	NA	Rosales	Acanthaceae	Pandanus
bASV595	648f9442b9d065e1123b4fdcb940ca3e	Bacteria	0.0416574	-1791.37	-1793.75	0.029162	0.157599	bASV595|Nitrospira	Nitrospiria	Nitrospirales	Nitrospiraceae	Nitrospira	NA	Arecales	Myrtaceae	Alocasia
bASV106	efb64bd407cc969888363f90113d85cc	Bacteria	0.0905407	-1764.16	-1766.41	0.0341705	0.170988	bASV106|SC-I-84	Gammaproteobacteria	Burkholderiales	SC-I-84	SC-I-84	NA	Rosales	Myrtaceae	Alocasia
bASV2061	45f870a4517c131c90b92023b565c26a	Bacteria	7.33137e-05	-1735.42	-1735.41	1	1	bASV2061|Inquilinus_sp.	Alphaproteobacteria	Azospirillales	Inquilinaceae	Inquilinus	NA	NA	Lamiaceae	NA
bASV2137	6ea87c5a5e7667df82ae6718b68777d8	Bacteria	7.33137e-05	-1745.55	-1745.54	1	1	bASV2137|NB1-j	NB1-j	NB1-j	NB1-j	NB1-j	NA	Arecales	Urticaceae	Brassaiopsis
bASV845	4c1743ab3034b0fe1f900e672c070d54	Bacteria	0.179953	-1810.66	-1815.36	0.00218128	0.0337786	bASV845|KF-JG30-B3	Alphaproteobacteria	Rhizobiales	KF-JG30-B3	KF-JG30-B3	Polypodiopsida	Others	Urticaceae	Rhaphidophora
bASV1405	76d595f25f9f039582e244dc53a6238e	Bacteria	0.0278879	-1774.92	-1775.11	0.534364	0.952643	bASV1405|Pedosphaeraceae	Verrucomicrobiae	Pedosphaerales	Pedosphaeraceae	Pedosphaeraceae	NA	Arecales	Myrtaceae	Bauhinia
bASV3163	b2155c48e26e978e1c53b349b8593c74	Bacteria	0.0335753	-1678.37	-1678.47	0.660056	1	bASV3163|Nakamurella	Actinobacteria	Frankiales	Nakamurellaceae	Nakamurella	NA	NA	Poaceae	Fagraea
bASV924	750bba8f02f6a5820e354a059ecca682	Bacteria	0.0957595	-1778.08	-1781.14	0.0133757	0.0980014	bASV924|uncultured_bacterium	Gammaproteobacteria	Gammaproteobacteria	Gammaproteobacteria	Gammaproteobacteria	NA	Rosales	Myrtaceae	Alocasia
bASV3730	db1866b6019ee9b35caa47df3d25a67a	Bacteria	7.33137e-05	-1632.96	-1632.96	1	1	bASV3730|Agromyces	Actinobacteria	Micrococcales	Microbacteriaceae	Agromyces	NA	Asparagales	Asparagaceae	Fagraea
bASV325	a4a52bdc9b45bc2efb1f9180d0f4b4f2	Bacteria	7.33137e-05	-1731.77	-1731.77	1	1	bASV325|uncultured_bacterium	RCP2-54	RCP2-54	RCP2-54	RCP2-54	NA	Lamiales	Urticaceae	Musa
bASV140	48a885bce11f35ad94e92963112fc356	Bacteria	0.0364734	-1811.2	-1812.54	0.100917	0.328005	bASV140|Allorhizobium-Neorhizobium-Pararhizobium-Rhizobium	Alphaproteobacteria	Rhizobiales	Rhizobiaceae	Allorhizobium-Neorhizobium-Pararhizobium-Rhizobium	NA	Fabales	Apocynaceae	Pandanus
bASV1591	7d042859dd6c3d254179ab386aa42794	Bacteria	0.00361601	-1696.51	-1696.52	0.885722	1	bASV1591|uncultured_bacterium	Thermoleophilia	Solirubrobacterales	Solirubrobacteraceae	Solirubrobacter	NA	Rosales	Apocynaceae	Fagraea
bASV629	c5bb25cd6e4a5ecbc05bc4a92e5f6c70	Bacteria	0.00887404	-1741.29	-1741.39	0.654425	1	bASV629|Novosphingobium	Alphaproteobacteria	Sphingomonadales	Sphingomonadaceae	Novosphingobium	NA	NA	Poaceae	NA
bASV530	9e941a70f467e044fbef2eba144fa4c2	Bacteria	7.33137e-05	-1777.62	-1777.61	1	1	bASV530|Sphingomonas	Alphaproteobacteria	Sphingomonadales	Sphingomonadaceae	Sphingomonas	NA	Arecales	Phyllanthaceae	Caryota
bASV2444	d12b62a876acea8cb7893a3b983d84e4	Bacteria	0.0358529	-1695.56	-1696.52	0.16549	0.446432	bASV2444|uncultured_soil	Bacteroidia	Cytophagales	Hymenobacteraceae	Adhaeribacter	NA	Myrtales	Myrtaceae	Alocasia
bASV447	8ad1f849fa8afa773d0f686cfba921b1	Bacteria	0.0681719	-1765.53	-1769	0.00843716	0.0751852	bASV447|Clostridium_sensu_stricto_13	Clostridia	Clostridiales	Clostridiaceae	Clostridium_sensu_stricto_13	NA	Myrtales	Acanthaceae	Alocasia
bASV683	205d828d280edd5e8c1cd86efe595cf7	Bacteria	7.33137e-05	-1781.45	-1781.45	1	1	bASV683|67-14	Thermoleophilia	Solirubrobacterales	67-14	67-14	NA	Lamiales	Meliaceae	Bauhinia
bASV1019	06798602bf41a9374565736a10d8d67c	Bacteria	0.10601	-1721.98	-1722.01	0.794647	1	bASV1019|Comamonas_koreensis	Gammaproteobacteria	Burkholderiales	Comamonadaceae	Comamonas	NA	NA	Urticaceae	Fagraea
bASV618	60e5a3a8d7d00e4389eb6eba8b38a5e2	Bacteria	0.0289499	-1793.42	-1793.62	0.524005	0.939646	bASV618|Acidobacteriales	Acidobacteriae	Acidobacteriales			Polypodiopsida	Others	Urticaceae	Musa
bASV1675	199789ad201dfeb08f94b8e37acf68e8	Bacteria	7.33137e-05	-1733.62	-1733.62	1	1	bASV1675|Gaiella	Thermoleophilia	Gaiellales	Gaiellaceae	Gaiella	NA	NA	Lamiaceae	Alocasia
bASV55	1cbb942cf0b76018392433c055f32eb7	Bacteria	0.0294546	-1812.63	-1813.62	0.160145	0.438364	bASV55|Bradyrhizobium	Alphaproteobacteria	Rhizobiales	Xanthobacteraceae	Bradyrhizobium	NA	Lamiales	Urticaceae	Musa
bASV3740	df4e448ca7e5f01908ae13d4c5fd308f	Bacteria	7.33137e-05	-1654.03	-1654.02	1	1	bASV3740|Gaiellales	Thermoleophilia	Gaiellales			NA	NA	Meliaceae	Fagraea
bASV6568	18e32ca7f2e72a823f72e712fe244274	Bacteria	7.33137e-05	-1624.78	-1624.78	1	1	bASV6568|Nannocystis	Polyangia	Nannocystales	Nannocystaceae	Nannocystis	NA	Myrtales	Asteraceae	Fagraea
bASV293	704f964a26bb0e32fcedd6b48ec2a01d	Bacteria	7.33137e-05	-1770.46	-1770.46	1	1	bASV293|Microvirga	Alphaproteobacteria	Rhizobiales	Beijerinckiaceae	Microvirga	NA	Rosales	Araliaceae	Alocasia
bASV487	0cb1b1d297ad3c1642e7e6fb46fbaac5	Bacteria	0.00942353	-1784.27	-1784.39	0.623242	1	bASV487|Enterobacteriaceae	Gammaproteobacteria	Enterobacterales	Enterobacteriaceae		NA	Gentianales	Asteraceae	Podocarpus
bASV280	7d9fac6d3ec9a4d41411ea5c24933982	Bacteria	0.0505311	-1810.37	-1811.17	0.207538	0.509269	bASV280|uncultured_bacterium	Alphaproteobacteria	Rhizobiales	Hyphomicrobiaceae	Pedomicrobium	NA	Lamiales	Urticaceae	Mycetia
bASV112	1b3a18e6dc737a25be2bee01c147ceee	Bacteria	7.33137e-05	-1818.07	-1818.07	1	1	bASV112|MB-A2-108	MB-A2-108	MB-A2-108	MB-A2-108	MB-A2-108	NA	Arecales	Lamiaceae	Dypsis
bASV1774	b021b7078409994543dfa429c23be728	Bacteria	7.33137e-05	-1705.95	-1705.95	1	1	bASV1774|Microbacterium	Actinobacteria	Micrococcales	Microbacteriaceae	Microbacterium	Pinopsida	Others	Poaceae	Lagerstroemia
bASV2420	b3d2fe338e1720f5771dc3e16cd9e64f	Bacteria	0.0839343	-1726.59	-1728.74	0.0383485	0.177555	bASV2420|Rhizobiaceae	Alphaproteobacteria	Rhizobiales	Rhizobiaceae		NA	Arecales	Araceae	Alocasia
bASV336	1b40ef0377a33688cda866a1428b4e8c	Bacteria	0.298895	-1757.94	-1762.81	0.00180877	0.0302732	bASV336|Subgroup_2	Acidobacteriae	Subgroup_2	Subgroup_2	Subgroup_2	Others	Others	Poaceae	Lagerstroemia
bASV500	093c9a7750b66c303cd05586c05ce970	Bacteria	0.160228	-1765.74	-1771.92	0.000440083	0.0137567	bASV500|Bacillus	Bacilli	Bacillales	Bacillaceae	Bacillus	Others	Arecales	Myrtaceae	Fagraea
bASV1254	36655c1da8bb6b525c4e3b2008a659de	Bacteria	0.0673002	-1717.46	-1721.99	0.00262889	0.0369797	bASV1254|Micromonosporaceae	Actinobacteria	Micromonosporales	Micromonosporaceae		Pinopsida	Malpighiales	Phyllanthaceae	Bauhinia
bASV1639	0c31c96a15ea37339eaadd3db51e5b15	Bacteria	7.33137e-05	-1778.57	-1778.57	1	1	bASV1639|Candidatus_Solibacter	Acidobacteriae	Solibacterales	Solibacteraceae	Candidatus_Solibacter	NA	Others	Urticaceae	Musa
bASV1815	61607b7c652e050280b56bf000ca6cbd	Bacteria	7.33137e-05	-1664.78	-1664.78	1	1	bASV1815|Gammaproteobacteria	Gammaproteobacteria				NA	NA	NA	NA
bASV2695	d490e2f63a06f4f9a3fad9b7daa97c77	Bacteria	7.33137e-05	-1627.65	-1627.65	1	1	bASV2695|Sphingomonas_polyaromaticivorans	Alphaproteobacteria	Sphingomonadales	Sphingomonadaceae	Sphingomonas	NA	Asparagales	NA	NA
bASV3838	586c4a0605c06fcbb6722dfc45c95f7f	Bacteria	7.33137e-05	-1658.24	-1658.24	1	1	bASV3838|uncultured_bacterium	MB-A2-108	MB-A2-108	MB-A2-108	MB-A2-108	NA	Arecales	Myrtaceae	Fagraea
bASV2681	5d89bb399dc97d5df687107c41359505	Bacteria	7.33137e-05	-1650.6	-1650.6	1	1	bASV2681|SC-I-84	Gammaproteobacteria	Burkholderiales	SC-I-84	SC-I-84	NA	Arecales	Lamiaceae	Dypsis
bASV2605	447bf69d2d7992199f58cada11df996c	Bacteria	0.00891327	-1720.71	-1720.79	0.687491	1	bASV2605|Bryobacter	Acidobacteriae	Bryobacterales	Bryobacteraceae	Bryobacter	NA	Malvales	Poaceae	Musa
bASV4795	8180872d8e6979eead61fb3179bb9d36	Bacteria	0.214348	-1647.33	-1650.49	0.0118959	0.0907244	bASV4795|ADurb.Bin063-1	Verrucomicrobiae	Pedosphaerales	Pedosphaeraceae	ADurb.Bin063-1	NA	Arecales	Urticaceae	Dypsis
bASV2025	ba9a1f0810e6790ec1f297e84e813269	Bacteria	0.283001	-1717.1	-1725.25	5.44359e-05	0.00429459	bASV2025|uncultured_bacterium	Alphaproteobacteria	Rhizobiales	Labraceae	Labrys	NA	Lamiales	Acanthaceae	Alocasia
bASV2381	2b3423da8cb551dcf0bd96fc322b1b77	Bacteria	0.0853289	-1696.72	-1697.42	0.237505	0.555274	bASV2381|Acidobacteriales	Acidobacteriae	Acidobacteriales			NA	NA	Urticaceae	Begonia
bASV6426	d5c3c1c02411460adc9eb8556e9cf7ba	Bacteria	0.039468	-1661.26	-1662.19	0.174568	0.456698	bASV6426|uncultured_bacterium	Clostridia	Clostridiales	Clostridiaceae	Clostridium_sensu_stricto_3	NA	Myrtales	Phyllanthaceae	Fagraea
bASV908	7e0cf9c2a5ce38c314c7c70e41972925	Bacteria	0.079894	-1773.77	-1773.81	0.78566	1	bASV908|IMCC26256	Acidimicrobiia	IMCC26256	IMCC26256	IMCC26256	NA	Others	Zingiberaceae	Horsfieldia
bASV1106	3989a5d1c3ec65c1fc8c4d7d279eb455	Bacteria	0.0627932	-1770.87	-1773.34	0.026213	0.14614	bASV1106|Microtrichales	Acidimicrobiia	Microtrichales			NA	Rosales	Moraceae	Alocasia
bASV2277	ebf5e06153e3afc6458de4a041bbbe8a	Bacteria	7.33137e-05	-1681.4	-1681.4	1	1	bASV2277|metagenome	Acidimicrobiia	Microtrichales	Ilumatobacteraceae		NA	Fabales	Meliaceae	Brassaiopsis
bASV1363	cb1043fe41dc174cc68246f6f94af665	Bacteria	7.33137e-05	-1773.55	-1773.55	1	1	bASV1363|Gaiellales	Thermoleophilia	Gaiellales			NA	Lamiales	Lamiaceae	Fagraea
bASV585	b58b1ee2e77b881ee684e84b95406226	Bacteria	0.21119	-1780.69	-1790.76	7.18933e-06	0.000910169	bASV585|uncultured_bacterium	Gammaproteobacteria	Burkholderiales	Rhodocyclaceae	Azovibrio	NA	Myrtales	Myrtaceae	Syzygium
bASV1859	785f9a060cb0fe1f3955e435d69cf919	Bacteria	7.33137e-05	-1764.14	-1764.13	1	1	bASV1859|uncultured_proteobacterium					NA	Lamiales	Acanthaceae	Fagraea
bASV2081	91befb34cbff11a5a64f441d9a53c464	Bacteria	7.33137e-05	-1688.1	-1688.1	1	1	bASV2081|Actinocorallia	Actinobacteria	Streptosporangiales	Thermomonosporaceae	Actinocorallia	NA	NA	Acanthaceae	NA
bASV3457	4bf6655eebfabd36149d529fa416cbba	Bacteria	0.0263186	-1643.63	-1644.07	0.348257	0.719825	bASV3457|uncultured_soil	Verrucomicrobiae	Pedosphaerales	Pedosphaeraceae	Pedosphaeraceae	NA	Arecales	Arecaceae	Lagerstroemia
bASV3915	73bedb95481577afc86b403317989f3a	Bacteria	0.0345188	-1626.46	-1627.09	0.261762	0.588617	bASV3915|Leucobacter	Actinobacteria	Micrococcales	Microbacteriaceae	Leucobacter	NA	Rosales	NA	Prunus
bASV473	59744cb18981b27f690012b18a7b4edf	Bacteria	0.108633	-1806.02	-1808.11	0.041111	0.185954	bASV473|KF-JG30-B3	Alphaproteobacteria	Rhizobiales	KF-JG30-B3	KF-JG30-B3	NA	Others	Urticaceae	Mycetia
bASV2351	ebc21eef8693684bc5102b25bdcc3b1b	Bacteria	0.0215726	-1635.78	-1636.36	0.281805	0.616707	bASV2351|Bradyrhizobium	Alphaproteobacteria	Rhizobiales	Xanthobacteraceae	Bradyrhizobium	Polypodiopsida	Arecales	Urticaceae	Horsfieldia
bASV302	347999c0f4d5bb5b8698253072ac745c	Bacteria	0.000794273	-1728.01	-1728.02	0.967692	1	bASV302|Terrabacter	Actinobacteria	Micrococcales	Intrasporangiaceae	Terrabacter	NA	Lamiales	NA	Bauhinia
bASV1975	2baf8a15dd6039c0540f015483814a08	Bacteria	0.0241877	-1695.32	-1695.88	0.293444	0.634773	bASV1975|67-14	Thermoleophilia	Solirubrobacterales	67-14	67-14	NA	Myrtales	Myrtaceae	Fagraea
bASV1939	033bf25662e8f0cb6a9177fa31b28841	Bacteria	7.33137e-05	-1675.05	-1675.05	1	1	bASV1939|uncultured_bacterium	Actinobacteria	Micromonosporales	Micromonosporaceae	Luedemannella	NA	Arecales	Myrtaceae	Magnolia
bASV1129	b8084a9dbc74e8f276995e04e6dc55fd	Bacteria	0.0899417	-1741.46	-1746.26	0.00193566	0.0312171	bASV1129|uncultured_bacterium	Clostridia	Clostridiales	Clostridiaceae	Clostridium_sensu_stricto_9	NA	Myrtales	Myrtaceae	Syzygium
bASV501	d86ede2e6a33b316c020ef25cc85e2b3	Bacteria	0.110162	-1789.57	-1792.15	0.0232071	0.13697	bASV501|Streptomyces	Actinobacteria	Streptomycetales	Streptomycetaceae	Streptomyces	NA	Arecales	Myrtaceae	Brassaiopsis
bASV884	25298342979c8972a9214c061ebc89ab	Bacteria	0.00268153	-1785.94	-1785.95	0.897716	1	bASV884|Mesorhizobium	Alphaproteobacteria	Rhizobiales	Rhizobiaceae	Mesorhizobium	Others	Myrtales	Myrtaceae	NA
bASV1403	6441bfe9ee27bb8cf53097cd01e40acd	Bacteria	0.0089763	-1729.5	-1729.61	0.625334	1	bASV1403|Rhodanobacteraceae	Gammaproteobacteria	Xanthomonadales	Rhodanobacteraceae		Others	Asparagales	Poaceae	Musa
bASV1516	3e2db393e6bd0b22951287cbe8ab5339	Bacteria	0.144689	-1750.96	-1752.99	0.0442355	0.194115	bASV1516|uncultured_Chloroflexaceae	Chloroflexia	Chloroflexales	Roseiflexaceae		NA	Arecales	Urticaceae	Dypsis
bASV496	9e487eca750b3ba4402311504a86de10	Bacteria	0.0718328	-1806.3	-1808.98	0.0205651	0.128254	bASV496|Xanthobacteraceae	Alphaproteobacteria	Rhizobiales	Xanthobacteraceae		NA	Lamiales	Acanthaceae	Alocasia
bASV3488	4a385ea3bcdecb24fac2a08ee293535b	Bacteria	7.33137e-05	-1671.34	-1671.33	1	1	bASV3488|uncultured_bacterium	Acidimicrobiia	Microtrichales			Polypodiopsida	Arecales	Arecaceae	Musa
bASV844	7ac3448b92aa468207813dc5bd1fb367	Bacteria	0.275815	-1771.11	-1777.91	0.000225146	0.00980054	bASV844|Bosea	Alphaproteobacteria	Rhizobiales	Beijerinckiaceae	Bosea	NA	Lamiales	Acanthaceae	Brassaiopsis
bASV542	0ccbfef9b447b0b3d551bafdff99e32d	Bacteria	7.33137e-05	-1782.97	-1782.97	1	1	bASV542|Acidobacteriales	Acidobacteriae	Acidobacteriales			Liliopsida	Arecales	Zingiberaceae	NA
bASV7002	ee4ec4f62f08a5d816bfff6177a4175b	Bacteria	0.0913857	-1649.38	-1652.42	0.0136282	0.0994425	bASV7002|uncultured_Alphaproteobacteria	Alphaproteobacteria	Kiloniellales	Fodinicurvataceae		Others	Malpighiales	Myrtaceae	Alocasia
bASV6059	58b49b00485c4323a9d7b274b86e4472	Bacteria	0.0769215	-1608.25	-1610.56	0.03169	0.16342	bASV6059|uncultured_Bacteroidetes	Bacteroidia	Sphingobacteriales	AKYH767	AKYH767	NA	Asparagales	Myrtaceae	Fagraea
bASV3762	9bc51c94a793424a75c04f6a2d186a69	Bacteria	7.33137e-05	-1678.82	-1678.82	1	1	bASV3762|Bryobacter	Acidobacteriae	Bryobacterales	Bryobacteraceae	Bryobacter	NA	NA	Araceae	Mycetia
bASV2837	c052f344f24bf7fd2c34ef9bc5320cf2	Bacteria	0.0537487	-1689.01	-1690.1	0.139021	0.401369	bASV2837|Microscillaceae	Bacteroidia	Cytophagales	Microscillaceae		NA	Arecales	Poaceae	Horsfieldia
bASV2967	57ef39f5c71c1d0780e3410bed9f1a92	Bacteria	0.271975	-1704.08	-1708.67	0.00244586	0.0367266	bASV2967|Devosia	Alphaproteobacteria	Rhizobiales	Devosiaceae	Devosia	NA	NA	Urticaceae	Mycetia
bASV5188	eab4643179eb3d794b68618c138c7d27	Bacteria	0.0454097	-1659.53	-1660.12	0.277224	0.609845	bASV5188|JG30-KF-CM66	JG30-KF-CM66	JG30-KF-CM66	JG30-KF-CM66	JG30-KF-CM66	NA	NA	Lauraceae	Dypsis
bASV489	9dd699bf61ff893b067cd4fc6014dbbc	Bacteria	0.0711932	-1763.59	-1769.84	0.000408494	0.0130925	bASV489|Novosphingobium	Alphaproteobacteria	Sphingomonadales	Sphingomonadaceae	Novosphingobium	Magnoliopsida	Myrtales	Myrtaceae	Fagraea
bASV1368	f04b60a3a9f63b057b694ec82d8f3fed	Bacteria	0.043672	-1752.26	-1753.09	0.197939	0.49622	bASV1368|Cellulosimicrobium	Actinobacteria	Micrococcales	Promicromonosporaceae	Cellulosimicrobium	NA	Arecales	Asteraceae	Brassaiopsis
bASV910	dbc97727245d2ebe7b67ad605e3e1f0a	Bacteria	0.0167909	-1734.99	-1735.25	0.475783	0.881261	bASV910|uncultured_bacterium	Bacteroidia	Sphingobacteriales	AKYH767	AKYH767	NA	Arecales	Myrtaceae	Duranta
bASV1148	be5aeadb083d7956500413e6aeac719e	Bacteria	0.0360384	-1768.02	-1768.44	0.363951	0.73722	bASV1148|Nocardia	Actinobacteria	Corynebacteriales	Nocardiaceae	Nocardia	NA	Lamiales	Urticaceae	Musa
bASV811	d11015e31d93b40e93d85d65b4a584cd	Bacteria	0.224757	-1727.96	-1729.43	0.0865109	0.29681	bASV811|Flavobacterium	Bacteroidia	Flavobacteriales	Flavobacteriaceae	Flavobacterium	NA	NA	Urticaceae	Begonia
bASV997	06786b790937602833caf28106b2b846	Bacteria	7.33137e-05	-1709.59	-1709.59	1	1	bASV997|Actinomycetospora	Actinobacteria	Pseudonocardiales	Pseudonocardiaceae	Actinomycetospora	NA	NA	NA	Fagraea
bASV1573	432856202d4b6e674fc1e115aa82bc96	Bacteria	0.112712	-1749.77	-1753.49	0.00640836	0.0654273	bASV1573|uncultured_bacterium	TK10	TK10	TK10	TK10	NA	Myrtales	Myrtaceae	Alocasia
bASV435	8937a92fe99c385237e58c73ea820504	Bacteria	7.33137e-05	-1749.66	-1749.66	1	1	bASV435|uncultured_bacterium	Actinobacteria	Propionibacteriales	Nocardioidaceae	Nocardioides	NA	NA	Urticaceae	Fagraea
bASV150	993744debedd9b0e4b6328284d64d285	Bacteria	0.0621783	-1787.56	-1789.83	0.0333089	0.168895	bASV150|Mesorhizobium_plurifarium	Alphaproteobacteria	Rhizobiales	Rhizobiaceae	Mesorhizobium	Others	Arecales	Poaceae	Musa
bASV1352	512cd24d6623ef5ced382dceae6dc0ab	Bacteria	7.33137e-05	-1753.29	-1753.29	1	1	bASV1352|Jatrophihabitans	Actinobacteria	Frankiales	Frankiaceae	Jatrophihabitans	NA	Others	Poaceae	Horsfieldia
bASV2028	8fbfd38e4ce4a9ac920e73b930ee6891	Bacteria	0.0825152	-1725.83	-1726.17	0.409041	0.799145	bASV2028|Candidatus_Solibacter	Acidobacteriae	Solibacterales	Solibacteraceae	Candidatus_Solibacter	Polypodiopsida	Malvales	Poaceae	Musa
bASV109	4356fbd4cf3e7d76ac9e6e6fab81edf0	Bacteria	0.158161	-1674.18	-1677.86	0.00669036	0.0672222	bASV109|Pedomicrobium	Alphaproteobacteria	Rhizobiales	Hyphomicrobiaceae	Pedomicrobium	NA	Rosales	Urticaceae	Alocasia
bASV306	e9d1bd60b898a05357bb7758ef2ed915	Bacteria	7.33137e-05	-1743.58	-1743.58	1	1	bASV306|Sphingobacterium	Bacteroidia	Sphingobacteriales	Sphingobacteriaceae	Sphingobacterium	NA	NA	Araceae	Excoecaria
bASV659	eb02b0e3c7128e9dd977013fa8fb4c39	Bacteria	0.168497	-1802.48	-1804.81	0.0309572	0.161224	bASV659|Acidobacteriales	Acidobacteriae	Acidobacteriales			NA	Lamiales	Urticaceae	Mycetia
bASV4368	373f80e91c7c2ed29195a669bf0625b9	Bacteria	0.0141763	-1653.15	-1653.35	0.534908	0.952643	bASV4368|Haliangium	Polyangia	Haliangiales	Haliangiaceae	Haliangium	NA	NA	NA	Fagraea
bASV587	16fee471f0069236a46f66a38761c6b3	Bacteria	0.0362849	-1779.7	-1780.17	0.331175	0.695303	bASV587|uncultured_Pseudolabrys	Alphaproteobacteria	Rhizobiales	Xanthobacteraceae		Polypodiopsida	Lamiales	Urticaceae	Musa
bASV1726	304e9908ee727e0d8838fdec0d20a36f	Bacteria	7.33137e-05	-1714.86	-1714.86	1	1	bASV1726|uncultured_bacterium	Alphaproteobacteria	Rhizobiales	KF-JG30-B3	KF-JG30-B3	Pinopsida	Others	Poaceae	Lagerstroemia
bASV1769	6915788680546881a3a0bb6c7b1e9a13	Bacteria	7.33137e-05	-1720.33	-1720.33	1	1	bASV1769|uncultured_Acidobacteria	Subgroup_5	Subgroup_5	Subgroup_5	Subgroup_5	NA	Rosales	Myrtaceae	Codiaeum
bASV449	b7afc78585932ad23a0ad4c08e87f0b3	Bacteria	0.0852796	-1727.39	-1731.5	0.00414028	0.048759	bASV449|Rhodococcus	Actinobacteria	Corynebacteriales	Nocardiaceae	Rhodococcus	NA	Rosales	Urticaceae	NA
bASV1055	e993688bede7ad1d7dcdf0f514095a7f	Bacteria	7.33137e-05	-1776.52	-1776.51	1	1	bASV1055|uncultured_bacterium	Alphaproteobacteria	Rhizobiales	Xanthobacteraceae		NA	NA	Urticaceae	NA
bASV1339	3f1ac4a48f6b5f2f29dab73db6210a22	Bacteria	0.0296449	-1742.12	-1742.82	0.23395	0.549501	bASV1339|metagenome	Gemmatimonadetes	Gemmatimonadales	Gemmatimonadaceae		NA	Asparagales	Myrtaceae	Alocasia
bASV3167	4b88892e1205926f687c13ff98791896	Bacteria	7.33137e-05	-1690.89	-1690.88	1	1	bASV3167|Mesorhizobium	Alphaproteobacteria	Rhizobiales	Rhizobiaceae	Mesorhizobium	NA	NA	NA	NA
bASV2707	c201f59cb1fe9face4f0e87fe9351929	Bacteria	0.158426	-1707.44	-1712.31	0.00179265	0.0302599	bASV2707|Rhodospirillaceae	Alphaproteobacteria	Rhodospirillales	Rhodospirillaceae		NA	Myrtales	Myrtaceae	Duranta
bASV3120	7a14c90be95b736663805a7def08035e	Bacteria	7.33137e-05	-1668.99	-1668.99	1	1	bASV3120|Solirubrobacteraceae	Thermoleophilia	Solirubrobacterales	Solirubrobacteraceae		NA	NA	NA	NA
bASV716	ed162027381323ff64304c8c67e33351	Bacteria	0.0576059	-1781.33	-1781.53	0.523274	0.939646	bASV716|uncultured_bacterium	Bacteroidia	Cytophagales	Microscillaceae	Ohtaekwangia	NA	NA	Acanthaceae	Alocasia
bASV488	01b211ad3a36e3bde64f1dcd375e76da	Bacteria	0.193403	-1804.14	-1807.89	0.00616494	0.0637128	bASV488|Microtrichales	Acidimicrobiia	Microtrichales			NA	Sapindales	Meliaceae	Rhaphidophora
bASV1557	be5d271d510f5accbfd6e723a5f03e63	Bacteria	0.00604158	-1734.05	-1734.08	0.80339	1	bASV1557|Xanthobacteraceae	Alphaproteobacteria	Rhizobiales	Xanthobacteraceae		Polypodiopsida	Others	NA	Horsfieldia
bASV2348	464bfdf02677a4cfa8024234e095272d	Bacteria	0.111699	-1729.35	-1731.47	0.0396617	0.182588	bASV2348|Reyranella	Alphaproteobacteria	Reyranellales	Reyranellaceae	Reyranella	NA	NA	Urticaceae	Mycetia
bASV2669	a0b8d80ab3e9ce0dd47bd60ad1e54e33	Bacteria	7.33137e-05	-1687.32	-1687.32	1	1	bASV2669|uncultured_bacterium	Ktedonobacteria	Ktedonobacterales	Ktedonobacteraceae	1921-03-01	Others	Others	Poaceae	Musa
bASV2862	69a4018637ad5b8cca8d9446d2a5605a	Bacteria	0.00665225	-1725.14	-1725.18	0.773748	1	bASV2862|Desulfobacterota					NA	Rosales	Myrtaceae	Mycetia
bASV232	3d2c8e95c7b09166dbfdc5bc3fa3e427	Bacteria	7.33137e-05	-1762.22	-1762.21	1	1	bASV232|Enterobacteriaceae	Gammaproteobacteria	Enterobacterales	Enterobacteriaceae		NA	NA	Acanthaceae	Rhaphidophora
bASV5	d22412ad64524477d2432ae89ebf9d97	Bacteria	0.0179155	-1600.97	-1601.65	0.243746	0.564653	bASV5|Enterobacterales	Gammaproteobacteria	Enterobacterales			NA	Sapindales	Araliaceae	Polyalthia
bASV4556	161a9cc24a72e4d488613b3b02b4d6cb	Bacteria	0.120215	-1665.88	-1670.09	0.00371905	0.0464697	bASV4556|Mesorhizobium	Alphaproteobacteria	Rhizobiales	Rhizobiaceae	Mesorhizobium	NA	Myrtales	Myrtaceae	Syzygium
bASV3349	02f47f4d7fcc831ca9fcd2144f494882	Bacteria	7.33137e-05	-1722.7	-1722.7	1	1	bASV3349|uncultured_bacterium	Verrucomicrobiae	Pedosphaerales	Pedosphaeraceae	Pedosphaeraceae	Polypodiopsida	Arecales	Urticaceae	Musa
bASV1231	25953aa0f41ce20ed9c8014dbca68413	Bacteria	7.33137e-05	-1768.16	-1768.16	1	1	bASV1231|uncultured_bacterium	Thermoleophilia				NA	Arecales	Myrtaceae	Dypsis
bASV468	a6d7759660bb0dd49ae0bd2631bb1d8b	Bacteria	7.33137e-05	-1778.67	-1778.67	1	1	bASV468|uncultured_bacterium	TK10	TK10	TK10	TK10	NA	NA	Acanthaceae	Mycetia
bASV3470	d2d9b33597d60a563fc4bccef605aaa9	Bacteria	0.0429149	-1696.54	-1697.87	0.103714	0.333734	bASV3470|Gemmatimonadaceae	Gemmatimonadetes	Gemmatimonadales	Gemmatimonadaceae		NA	Arecales	Arecaceae	Fagraea
bASV364	34e69029a552272527dc85c479a60fff	Bacteria	7.33137e-05	-1808.79	-1808.79	1	1	bASV364|Gaiellales	Thermoleophilia	Gaiellales			NA	NA	Acanthaceae	Lagerstroemia
bASV1640	b0c0f04399d148de6fac4ee5c2b2c128	Bacteria	0.0939584	-1748.42	-1749.45	0.151304	0.421713	bASV1640|Labrys	Alphaproteobacteria	Rhizobiales	Labraceae	Labrys	NA	Rosales	Urticaceae	NA
bASV3992	307caf6db8abb8565ca871c6f6af5b40	Bacteria	0.304716	-1645.36	-1652.05	0.000253419	0.0103002	bASV3992|Lechevalieria	Actinobacteria	Pseudonocardiales	Pseudonocardiaceae	Lechevalieria	NA	Lamiales	Acanthaceae	Mycetia
bASV2140	ba6f1e01b3e907e7e0f8ca1a147674ab	Bacteria	0.117046	-1661.84	-1666.74	0.00174841	0.0301155	bASV2140|uncultured_bacterium	Actinobacteria	Pseudonocardiales	Pseudonocardiaceae	Pseudonocardia	Pinopsida	Arecales	Moraceae	Prunus
bASV220	0415dcc4eb31ec68af5710086c6fdbf7	Bacteria	0.0690522	-1777.8	-1780.91	0.012694	0.0942556	bASV220|metagenome	Alphaproteobacteria	Rhizobiales	Methyloligellaceae		NA	Lamiales	Urticaceae	Alocasia
bASV726	6dba0cf8403702b2f4e5d50ec9b4a71e	Bacteria	7.33137e-05	-1755.66	-1755.66	1	1	bASV726|Duganella_sp.	Gammaproteobacteria	Burkholderiales	Oxalobacteraceae	Massilia	NA	Myrtales	Araceae	Alocasia
bASV1683	437cb82c1d5d6e879dc93ca99458b851	Bacteria	7.33137e-05	-1686.55	-1686.54	1	1	bASV1683|Sphingomonas	Alphaproteobacteria	Sphingomonadales	Sphingomonadaceae	Sphingomonas	NA	NA	NA	Pandanus
bASV802	0741cf88484592f5767dc505d2dd401a	Bacteria	0.235439	-1782.01	-1788.27	0.000402249	0.0130925	bASV802|Gaiellales	Thermoleophilia	Gaiellales			NA	Lamiales	Lamiaceae	Musa
bASV157	b59b161e952051b11d2c9352b428c83f	Bacteria	0.0588074	-1809.25	-1809.58	0.421669	0.818135	bASV157|Dongia	Alphaproteobacteria	Dongiales	Dongiaceae	Dongia	Magnoliopsida	Myrtales	Myrtaceae	Bauhinia
bASV3644	51eefaacc309c5511138290d20d9ffec	Bacteria	7.33137e-05	-1669.89	-1669.89	1	1	bASV3644|uncultured_bacterium	Actinobacteria	Pseudonocardiales	Pseudonocardiaceae	Actinophytocola	NA	Lamiales	Myrtaceae	Caryota
bASV2854	c17517f0f9c0626a07079452d627a494	Bacteria	7.33137e-05	-1689.96	-1689.96	1	1	bASV2854|metagenome	Acidimicrobiia	Microtrichales	Ilumatobacteraceae	CL500-29_marine_group	NA	Gentianales	Apocynaceae	Alocasia
bASV1766	068500403fb377052c8f161843c1cb97	Bacteria	7.33137e-05	-1745.65	-1745.65	1	1	bASV1766|Bryobacter	Acidobacteriae	Bryobacterales	Bryobacteraceae	Bryobacter	Others	NA	Lamiaceae	Duranta
bASV3287	e3d8b4f646108b6492925d00a0626250	Bacteria	0.0873027	-1634.4	-1638.06	0.0068667	0.0676517	bASV3287|Candidatus_Solibacter	Acidobacteriae	Solibacterales	Solibacteraceae	Candidatus_Solibacter	NA	Myrtales	Myrtaceae	Fagraea
bASV375	2622d9965815372fa988c4b16c69c94c	Bacteria	0.0515428	-1626.22	-1627.02	0.207833	0.509269	bASV375|metagenome	Gammaproteobacteria	Gammaproteobacteria_Incertae_Sedis	Unknown_Family	Acidibacter	Magnoliopsida	Lamiales	Lamiaceae	Brassaiopsis
bASV2214	22a4322aebb4dcd2619d2f48876a4ed1	Bacteria	7.33137e-05	-1650.85	-1650.85	1	1	bASV2214|Streptomyces_tyrosinilyticus	Actinobacteria	Streptomycetales	Streptomycetaceae	Streptomyces	NA	NA	NA	Mycetia
bASV4520	80554235db862d14e647be4f31e83628	Bacteria	0.114162	-1653.07	-1654.09	0.153227	0.425872	bASV4520|uncultured_Mesorhizobium	Alphaproteobacteria	Rhizobiales	Rhizobiaceae	Mesorhizobium	NA	NA	Urticaceae	Alocasia
bASV559	8f22f9fb453b9fdaee345fbc026d48f8	Bacteria	0.0341861	-1771.02	-1771.43	0.369022	0.744513	bASV559|IMCC26256	Acidimicrobiia	IMCC26256	IMCC26256	IMCC26256	NA	Arecales	Phyllanthaceae	Fagraea
bASV3089	1aff3e10f8f14a2b3bb1fac5a64e4bd7	Bacteria	0.0520884	-1693.38	-1695.63	0.0338359	0.170323	bASV3089|uncultured_bacterium	Verrucomicrobiae	Pedosphaerales	Pedosphaeraceae	Pedosphaeraceae	Others	Myrtales	Myrtaceae	Codiaeum
bASV110	3e1c4e20e03ecd733daf02644e1c8441	Bacteria	0.0661943	-1580.04	-1580.85	0.202504	0.502852	bASV110|Acidibacter	Gammaproteobacteria	Gammaproteobacteria_Incertae_Sedis	Unknown_Family	Acidibacter	NA	Myrtales	Myrtaceae	Alocasia
bASV5569	23ac440c4538dd9a5f8d5902ad4746a9	Bacteria	0.0110056	-1632.19	-1632.29	0.657554	1	bASV5569|uncultured_bacterium	Gammaproteobacteria	Xanthomonadales	Rhodanobacteraceae		NA	Myrtales	Myrtaceae	Alocasia
bASV850	d9077f70ba08c3cdaf802272dc9c9266	Bacteria	7.33137e-05	-1748	-1747.99	1	1	bASV850|uncultured_bacterium	Verrucomicrobiae	Pedosphaerales	Pedosphaeraceae	ADurb.Bin063-1	NA	Malvales	Poaceae	NA
bASV539	cb650535c7375161927926c94d15c2cc	Bacteria	7.33137e-05	-1697.11	-1697.11	1	1	bASV539|Chryseobacterium	Bacteroidia	Flavobacteriales	Weeksellaceae	Chryseobacterium	NA	NA	Araceae	Alocasia
bASV804	4cc542bbbff10a5ae0873932459158ce	Bacteria	0.174863	-1766.1	-1771.39	0.0011381	0.024014	bASV804|mle1-7	Gammaproteobacteria	Burkholderiales	Nitrosomonadaceae	mle1-7	Polypodiopsida	NA	Urticaceae	Mycetia
bASV1409	33106af01574ed55487b2a8de9b73d13	Bacteria	0.0830871	-1721.15	-1724.17	0.0141055	0.101463	bASV1409|Steroidobacteraceae	Gammaproteobacteria	Steroidobacterales	Steroidobacteraceae		NA	Myrtales	Myrtaceae	Excoecaria
bASV3370	3796a2abd47264a2fa946787c22939d4	Bacteria	0.0150558	-1711.76	-1712.07	0.43546	0.837012	bASV3370|uncultured_Desulfoglaeba	NB1-j	NB1-j	NB1-j	NB1-j	NA	Arecales	Moraceae	Brassaiopsis
bASV1635	339913255c0994134447b90ae4318711	Bacteria	7.33137e-05	-1743.1	-1743.1	1	1	bASV1635|uncultured_actinobacterium	Acidimicrobiia	IMCC26256	IMCC26256	IMCC26256	NA	NA	Rubiaceae	NA
bASV261	80f519878115490fb644740b02baf2a4	Bacteria	0.229332	-1805.63	-1810.18	0.00253767	0.0367266	bASV261|Microvirga	Alphaproteobacteria	Rhizobiales	Beijerinckiaceae	Microvirga	NA	Myrtales	Myrtaceae	Alocasia
bASV3171	4451465c722ef8219ee951b4a765399b	Bacteria	0.00592367	-1658.88	-1658.93	0.751396	1	bASV3171|Shinella_sp.	Alphaproteobacteria	Rhizobiales	Rhizobiaceae	Allorhizobium-Neorhizobium-Pararhizobium-Rhizobium	NA	NA	Asteraceae	Brassaiopsis
bASV1601	bb9b9471a17495a0d3b838f7fe346af9	Bacteria	0.0796288	-1752.15	-1753.52	0.0973833	0.321061	bASV1601|uncultured_bacterium	JG30-KF-CM66	JG30-KF-CM66	JG30-KF-CM66	JG30-KF-CM66	NA	NA	Araceae	Alocasia
bASV1669	d0121413428316c5d7fcda2f5ebe7559	Bacteria	7.33137e-05	-1753.58	-1753.58	1	1	bASV1669|uncultured_bacterium	JG30-KF-CM66	JG30-KF-CM66	JG30-KF-CM66	JG30-KF-CM66	NA	NA	Rubiaceae	Brassaiopsis
bASV1375	2437ccb885c9c52ae5b81810d858a14b	Bacteria	0.0563499	-1727.81	-1728.18	0.388137	0.771216	bASV1375|uncultured_Conexibacteraceae	Thermoleophilia	Solirubrobacterales	67-14	67-14	NA	Arecales	Lamiaceae	Dypsis
bASV32	eb4737fd50d62fdcc1d7f4ad41c42db0	Bacteria	7.33137e-05	-1633.98	-1633.97	1	1	bASV32|Methyloligellaceae	Alphaproteobacteria	Rhizobiales	Methyloligellaceae		NA	Lamiales	Meliaceae	Dypsis
bASV2499	710db5e0b524bf58dd4aaaf10fb0b256	Bacteria	0.0145898	-1650.23	-1650.6	0.386684	0.769721	bASV2499|Amaricoccus	Alphaproteobacteria	Rhodobacterales	Rhodobacteraceae	Amaricoccus	NA	Arecales	Myrtaceae	Fagraea
bASV887	9c7c78c848f5e9fc6446de4274a3e3e7	Bacteria	0.041629	-1788.25	-1788.76	0.313438	0.669725	bASV887|uncultured_soil	Verrucomicrobiae	Pedosphaerales	Pedosphaeraceae	Pedosphaeraceae	NA	NA	Myrtaceae	Alocasia
bASV2237	08a978c1302a912e42f20ad396c83bab	Bacteria	0.0412691	-1664.79	-1665.15	0.391355	0.774754	bASV2237|Devosia	Alphaproteobacteria	Rhizobiales	Devosiaceae	Devosia	NA	Lamiales	Urticaceae	Begonia
bASV381	4e650f1b6b80cc206177a662471f311a	Bacteria	0.130809	-1745.69	-1749.27	0.00748258	0.0701666	bASV381|Bacillus	Bacilli	Bacillales	Bacillaceae	Bacillus	NA	Asparagales	Myrtaceae	Fagraea
bASV1013	31aac70df8639dc0807df914d82ad681	Bacteria	0.0425732	-1776.53	-1777.8	0.111125	0.348661	bASV1013|SWB02	Alphaproteobacteria	Caulobacterales	Hyphomonadaceae	SWB02	Others	Rosales	Moraceae	Alocasia
bASV2528	f78be4b0e7f3f5593bdb669ae1deacee	Bacteria	0.00120252	-1691.75	-1691.75	0.94746	1	bASV2528|uncultured_soil	Verrucomicrobiae	Pedosphaerales	Pedosphaeraceae	Pedosphaeraceae	NA	Arecales	Urticaceae	NA
bASV757	ab892ea9e5a06191d2299e7c6ddddce1	Bacteria	0.0398917	-1779.44	-1780.53	0.140538	0.403976	bASV757|Xanthobacteraceae	Alphaproteobacteria	Rhizobiales	Xanthobacteraceae		NA	NA	Araceae	Alocasia
bASV1592	3d8007b71575c0ccaecb733b0248e832	Bacteria	0.0511643	-1717.38	-1719.08	0.0651798	0.246321	bASV1592|Hyphomicrobium	Alphaproteobacteria	Rhizobiales	Hyphomicrobiaceae	Hyphomicrobium	NA	Arecales	Arecaceae	Fagraea
bASV312	a20b4b0356bda647710097928d45db2d	Bacteria	0.167198	-1821.86	-1825.59	0.00634864	0.06508	bASV312|Gaiellales	Thermoleophilia	Gaiellales			NA	Lamiales	Acanthaceae	Mycetia
bASV712	b2e1c7673e0d4e6f73691e454438f9a2	Bacteria	0.0338676	-1769.98	-1771.61	0.0711902	0.261616	bASV712|Candidatus_Solibacter	Acidobacteriae	Solibacterales	Solibacteraceae	Candidatus_Solibacter	NA	Myrtales	Myrtaceae	Magnolia
bASV4047	df121afb54e116154245546fe77f65a1	Bacteria	7.33137e-05	-1639.25	-1639.25	1	1	bASV4047|Marmoricola	Actinobacteria	Propionibacteriales	Nocardioidaceae	Marmoricola	NA	NA	NA	Alocasia
bASV443	95d85da811246ae83619b97ca202a8f7	Bacteria	7.33137e-05	-1765.21	-1765.21	1	1	bASV443|Bradyrhizobium	Alphaproteobacteria	Rhizobiales	Xanthobacteraceae	Bradyrhizobium	NA	NA	Arecaceae	Dypsis
bASV4670	08603daa7de763bdebfa48282ee2dc49	Bacteria	0.0475049	-1667.14	-1670.34	0.0114574	0.0889882	bASV4670|Bacteria					NA	Arecales	Myrtaceae	Syzygium
bASV3553	bd004665c402965aa1fd382d86fce670	Bacteria	7.33137e-05	-1684.25	-1684.25	1	1	bASV3553|Microvirga_ossetica	Alphaproteobacteria	Rhizobiales	Beijerinckiaceae	Microvirga	NA	NA	Acanthaceae	Brassaiopsis
bASV4109	b95830ed409a4ca6898434dd26b51500	Bacteria	0.0295242	-1658.59	-1659.33	0.222465	0.530396	bASV4109|uncultured_bacterium	Myxococcia	Myxococcales	Myxococcaceae	KD3-10	NA	Arecales	Poaceae	Lagerstroemia
bASV2957	cd79d32bf8a4db7f9bfe110cdf36b5d0	Bacteria	7.33137e-05	-1666.69	-1666.69	1	1	bASV2957|Gemmatimonadaceae	Gemmatimonadetes	Gemmatimonadales	Gemmatimonadaceae		NA	Lamiales	Acanthaceae	Musa
bASV555	1847d107b369a9c8a93726483f898bc0	Bacteria	7.33137e-05	-1773.08	-1773.07	1	1	bASV555|Occallatibacter	Acidobacteriae	Acidobacteriales	Acidobacteriaceae_(Subgroup_1)	Occallatibacter	Others	Others	Poaceae	Horsfieldia
bASV2911	264064b143c948306f35eea3f14352bb	Bacteria	7.33137e-05	-1667.68	-1667.68	1	1	bASV2911|metagenome	Actinobacteria	Propionibacteriales	Propionibacteriaceae		NA	Arecales	Myrtaceae	Fagraea
bASV360	a8d7a74fd191fc2f4948bf89287aee89	Bacteria	0.0268436	-1738.62	-1739.43	0.202968	0.502852	bASV360|Polyangiaceae	Polyangia	Polyangiales	Polyangiaceae		NA	Malvales	Zingiberaceae	NA
bASV2521	b96cb7ea78ddf4af0f37bdcac991a032	Bacteria	0.168939	-1717.63	-1719.13	0.0823067	0.287846	bASV2521|uncultured_bacterium	Alphaproteobacteria	Micropepsales	Micropepsaceae		NA	Sapindales	Urticaceae	Mycetia
bASV1724	8a41921c4397cea1c08b5509e8d95c77	Bacteria	0.00123641	-1707.71	-1707.71	0.918869	1	bASV1724|Ferruginibacter	Bacteroidia	Chitinophagales	Chitinophagaceae	Ferruginibacter	NA	Arecales	Urticaceae	Begonia
bASV394	b86ac5570c42d0ff2475726e8622bf51	Bacteria	0.0943847	-1786.72	-1788.4	0.0662056	0.248677	bASV394|Mycobacterium	Actinobacteria	Corynebacteriales	Mycobacteriaceae	Mycobacterium	NA	NA	Meliaceae	Mycetia
bASV3466	6068306f9db5d2d802a2ad0563045478	Bacteria	0.00316908	-1673.21	-1673.25	0.778681	1	bASV3466|uncultured_bacterium	Actinobacteria	Kineosporiales	Kineosporiaceae		NA	Myrtales	NA	Fagraea
bASV470	44d227a0987f5f521d83331872b353a0	Bacteria	0.0481515	-1777.49	-1778.33	0.195855	0.492501	bASV470|Mycobacterium	Actinobacteria	Corynebacteriales	Mycobacteriaceae	Mycobacterium	NA	NA	Lamiaceae	NA
bASV643	09e83edbf7587a51d2be6d22627b302d	Bacteria	0.191296	-1695.3	-1697.62	0.0310094	0.161224	bASV643|Burkholderia-Caballeronia-Paraburkholderia	Gammaproteobacteria	Burkholderiales	Burkholderiaceae	Burkholderia-Caballeronia-Paraburkholderia	Others	Others	Poaceae	Musa
bASV573	9c970f7d1f1a544d8a1a0a380079f7f1	Bacteria	0.0439063	-1794.87	-1796.6	0.0624672	0.241564	bASV573|Ellin6067	Gammaproteobacteria	Burkholderiales	Nitrosomonadaceae	Ellin6067	NA	Malvales	Zingiberaceae	Horsfieldia
bASV459	89cd080c874635dfa5d4144d10207b30	Bacteria	7.33137e-05	-1801.54	-1801.54	1	1	bASV459|uncultured_soil					NA	NA	Urticaceae	Dypsis
bASV1226	0991647f18ec71f555806dac42c856a5	Bacteria	0.196907	-1743.71	-1746.22	0.0250333	0.142871	bASV1226|uncultured_bacterium	Acidobacteriae	Acidobacteriales	Koribacteraceae	Candidatus_Koribacter	Pinopsida	Others	Poaceae	Lagerstroemia
bASV1298	ef1214753c61ec76a87a8451d9d49685	Bacteria	0.0895186	-1731.06	-1736.11	0.00148581	0.0278013	bASV1298|Steroidobacter	Gammaproteobacteria	Steroidobacterales	Steroidobacteraceae	Steroidobacter	NA	Myrtales	Myrtaceae	Syzygium
bASV1404	7558b1972f2fc501fe8b4935bf60a2c3	Bacteria	7.33137e-05	-1646.21	-1646.21	1	1	bASV1404|Rhizobium_smilacinae	Alphaproteobacteria	Rhizobiales	Rhizobiaceae	Allorhizobium-Neorhizobium-Pararhizobium-Rhizobium	NA	NA	NA	NA
bASV2972	c4d3c9f977f6c54e8171ff970e20c7b4	Bacteria	0.0178112	-1696.61	-1697.03	0.360235	0.732623	bASV2972|uncultured_Gemmatimonadales	S0134_terrestrial_group	S0134_terrestrial_group	S0134_terrestrial_group	S0134_terrestrial_group	NA	Myrtales	Myrtaceae	Fagraea
bASV761	55f7e05e59a19a3740eb783a12d33a24	Bacteria	0.0124136	-1767.39	-1767.57	0.547489	0.96737	bASV761|Chitinophagaceae	Bacteroidia	Chitinophagales	Chitinophagaceae		NA	NA	Meliaceae	Musa
bASV2011	69e8d983a476d8d71b6db40f21f95043	Bacteria	0.0262254	-1717.59	-1718.23	0.257029	0.582696	bASV2011|ADurb.Bin063-1	Verrucomicrobiae	Pedosphaerales	Pedosphaeraceae	ADurb.Bin063-1	NA	Arecales	Arecaceae	Dypsis
bASV282	a81697cce31c738ea8ebf5dc0260a796	Bacteria	0.257555	-1733.34	-1743.72	5.19759e-06	0.000774135	bASV282|uncultured_bacterium	Subgroup_11	Subgroup_11	Subgroup_11	Subgroup_11	NA	Rosales	Araceae	Mycetia
bASV1542	7e6362f25ddfd5e46317216b9b4df53e	Bacteria	0.112787	-1720.83	-1723.68	0.0168859	0.114625	bASV1542|Actinophytocola	Actinobacteria	Pseudonocardiales	Pseudonocardiaceae	Actinophytocola	NA	Myrtales	Myrtaceae	Duranta
bASV2905	c6bf53a19ffcba79ae2b8c4bce0ce69e	Bacteria	0.0151295	-1713.72	-1713.84	0.622414	1	bASV2905|uncultured_bacterium	MB-A2-108	MB-A2-108	MB-A2-108	MB-A2-108	NA	Arecales	Arecaceae	Fagraea
bASV365	b47906472c86f1922a9ee8f3a5f33d21	Bacteria	0.0237872	-1809.06	-1809.25	0.534205	0.952643	bASV365|Candidatus_Solibacter	Acidobacteriae	Solibacterales	Solibacteraceae	Candidatus_Solibacter	NA	Others	Urticaceae	Musa
bASV1135	d5444ccde26425ec2389d0f05b700f9a	Bacteria	0.0430238	-1764.48	-1766.21	0.0632654	0.242989	bASV1135|uncultured_bacterium	Actinobacteria	Frankiales	Frankiales	Frankiales	Others	Arecales	Myrtaceae	Alocasia
bASV1556	6e5551795465766c8eab24cfc5be2fca	Bacteria	0.0158469	-1659.95	-1660.59	0.255818	0.581446	bASV1556|Chitinophagaceae	Bacteroidia	Chitinophagales	Chitinophagaceae		Others	Asparagales	Poaceae	Rhaphidophora
bASV513	0798340386c3b036a82d70939ec2ff18	Bacteria	0.0337558	-1751.65	-1751.99	0.407696	0.797747	bASV513|Bacillus_nealsonii	Bacilli	Bacillales	Bacillaceae	Bacillus	NA	Arecales	Asteraceae	Bauhinia
bASV1653	3a0f6d90ca2d68e5ff0a41a190c0948b	Bacteria	0.113013	-1725.22	-1730.6	0.00103973	0.023093	bASV1653|Pedomicrobium	Alphaproteobacteria	Rhizobiales	Hyphomicrobiaceae	Pedomicrobium	NA	Rosales	Moraceae	Alocasia
bASV1719	1f0b1b6c7810eefe073ffdf11f309615	Bacteria	7.33137e-05	-1749.05	-1749.04	1	1	bASV1719|uncultured_bacterium	Verrucomicrobiae	Pedosphaerales	Pedosphaeraceae	Ellin517	NA	NA	Phyllanthaceae	Fagraea
bASV570	f55e358a44d2cebfa9e6a49eddf79d0d	Bacteria	0.1578	-1792.04	-1794.61	0.0234924	0.137854	bASV570|uncultured_bacterium	Actinobacteria	Frankiales	Frankiaceae	Jatrophihabitans	NA	Lamiales	Urticaceae	Musa
bASV1041	fc63b2836d2ea8126afe3b46d5517b4f	Bacteria	0.0305414	-1740.38	-1741.53	0.129425	0.381939	bASV1041|Allorhizobium-Neorhizobium-Pararhizobium-Rhizobium	Alphaproteobacteria	Rhizobiales	Rhizobiaceae	Allorhizobium-Neorhizobium-Pararhizobium-Rhizobium	NA	Rosales	Urticaceae	Brassaiopsis
bASV1792	eead2908b2155a2ba60a6528ecbc47e6	Bacteria	0.0303329	-1721.92	-1722.43	0.311179	0.666331	bASV1792|uncultured_bacterium	Gammaproteobacteria	Burkholderiales	Nitrosomonadaceae	oc32	NA	NA	Lamiaceae	Alocasia
bASV3055	2ca616201152dfd2457883a5da87dfaa	Bacteria	7.33137e-05	-1671.99	-1671.99	1	1	bASV3055|Elsterales	Alphaproteobacteria	Elsterales			NA	NA	Poaceae	Fagraea
bASV1317	3ac049fd4d312eb8022231a75b060020	Bacteria	0.0667638	-1714.33	-1715.81	0.0855844	0.294429	bASV1317|A21b	Gammaproteobacteria	Burkholderiales	A21b	A21b	NA	Arecales	Asteraceae	Dypsis
bASV2089	2b7733b972f19a0d6e6744e69039c326	Bacteria	7.33137e-05	-1694.28	-1694.28	1	1	bASV2089|Elsterales	Alphaproteobacteria	Elsterales			NA	Arecales	Poaceae	Pterospermum
bASV3294	ef7a7a1ea7e0953fac392f0ff07f7306	Bacteria	0.0345294	-1701.49	-1702.45	0.164514	0.444616	bASV3294|uncultured_bacterium	Phycisphaerae	Phycisphaerales	Phycisphaeraceae	SM1A02	NA	Arecales	Myrtaceae	Fagraea
bASV438	7a2759a80a6d1c5c6d2dd5e28b4bc689	Bacteria	0.195892	-1685.52	-1690.72	0.00124997	0.0257311	bASV438|Erwinia	Gammaproteobacteria	Enterobacterales	Erwiniaceae	Erwinia	NA	Asparagales	NA	Duranta
bASV432	4e156f3de84de61c540b95b0b3846678	Bacteria	0.0501348	-1782.43	-1782.89	0.338601	0.705047	bASV432|Rhodoplanes	Alphaproteobacteria	Rhizobiales	Xanthobacteraceae	Rhodoplanes	NA	Rosales	Acanthaceae	Mycetia
bASV2229	bed5990101cdc375931d64f88e0abe2e	Bacteria	0.030311	-1653.93	-1654.71	0.212385	0.51658	bASV2229|0319-6G20	Oligoflexia	0319-6G20	0319-6G20	0319-6G20	Liliopsida	Arecales	Poaceae	Horsfieldia
bASV431	db75ef0985261b030cdda4d8383d4e4c	Bacteria	7.33137e-05	-1798.41	-1798.4	1	1	bASV431|Comamonadaceae	Gammaproteobacteria	Burkholderiales	Comamonadaceae		NA	Arecales	NA	Excoecaria
bASV1157	9031491a1d84f46bfd11222750153983	Bacteria	0.052758	-1763.61	-1764.24	0.261593	0.588617	bASV1157|Hyphomicrobium	Alphaproteobacteria	Rhizobiales	Hyphomicrobiaceae	Hyphomicrobium	NA	NA	Asteraceae	Alocasia
bASV6312	70caa9a6ad85c98413af1f06d4b537f3	Bacteria	0.095855	-1624.91	-1625.41	0.316061	0.673012	bASV6312|uncultured_bacterium	Verrucomicrobiae	Pedosphaerales	Pedosphaeraceae	Pedosphaeraceae	NA	Arecales	Arecaceae	Dypsis
bASV938	14fa7f96bb811541e15e8255a986a58c	Bacteria	0.00979112	-1741.69	-1741.81	0.622346	1	bASV938|Acidibacter	Gammaproteobacteria	Gammaproteobacteria_Incertae_Sedis	Unknown_Family	Acidibacter	NA	Malvales	Poaceae	Horsfieldia
bASV2597	8f8cf276557d3da7dd22c1e22eaa1a67	Bacteria	0.00979959	-1735.85	-1735.97	0.611606	1	bASV2597|metagenome	Bacteroidia	Flavobacteriales	NS9_marine_group	NS9_marine_group	NA	Arecales	Apocynaceae	Mycetia
bASV2776	01aace2cbd29be2d070eabcb21e8c340	Bacteria	0.0144819	-1726.31	-1726.62	0.431473	0.831424	bASV2776|BIrii41	Polyangia	Polyangiales	BIrii41	BIrii41	NA	Malpighiales	Myrtaceae	Alocasia
bASV2375	867e0ad2c6f84a6939134f9d40598402	Bacteria	0.0306857	-1663.6	-1664.4	0.206225	0.507446	bASV2375|Acidibacter	Gammaproteobacteria	Gammaproteobacteria_Incertae_Sedis	Unknown_Family	Acidibacter	Pinopsida	Malpighiales	Lauraceae	Fagraea
bASV278	06a3b76fec46079a1d315111b76eefd2	Bacteria	0.183013	-1734.83	-1742.39	0.000100404	0.00570035	bASV278|uncultured_Acidimicrobiaceae	Acidimicrobiia	Microtrichales	Ilumatobacteraceae		NA	Lamiales	Lamiaceae	Clerodendrum
bASV3293	c978df7cda479b360444b44fa0c47231	Bacteria	7.33137e-05	-1699.6	-1699.6	1	1	bASV3293|Burkholderiales	Gammaproteobacteria	Burkholderiales			NA	Arecales	Arecaceae	NA
bASV451	d6b0bade0573cbf9ca790c33b27ee91d	Bacteria	0.0237892	-1660.65	-1660.71	0.72611	1	bASV451|uncultured_bacterium	Gammaproteobacteria	Burkholderiales	Sutterellaceae		NA	Rosales	Urticaceae	Mycetia
bASV219	857c219dc1fd5658e6d1c80b885a86d7	Bacteria	0.073913	-1789.6	-1792.61	0.0142393	0.102136	bASV219|Nitrospira	Nitrospiria	Nitrospirales	Nitrospiraceae	Nitrospira	NA	Rosales	Urticaceae	Alocasia
bASV4457	388bdb7d6a6d3607de8ab9076d1ead9a	Bacteria	0.23777	-1658.73	-1662.69	0.00485051	0.0543429	bASV4457|A0839	Alphaproteobacteria	Rhizobiales	A0839	A0839	Polypodiopsida	NA	Rubiaceae	Mycetia
bASV287	5981a9a1c7ad503d61bdfd4f4a50a009	Bacteria	0.210345	-1692.09	-1702.84	3.51933e-06	0.000594062	bASV287|Chryseobacterium	Bacteroidia	Flavobacteriales	Weeksellaceae	Chryseobacterium	NA	Lamiales	Urticaceae	Mycetia
bASV665	77e4ba860950c8cfd0aa6bbc3ffd6d26	Bacteria	0.0300218	-1706.22	-1706.69	0.331975	0.695827	bASV665|uncultured_bacterium					NA	Arecales	Myrtaceae	Alocasia
bASV1578	8face6f44561904579b1f74a1daaad78	Bacteria	0.222465	-1708.22	-1711.5	0.0105043	0.0847895	bASV1578|SC-I-84	Gammaproteobacteria	Burkholderiales	SC-I-84	SC-I-84	Polypodiopsida	Lamiales	Urticaceae	Mycetia
bASV677	721e8c91669180974e2f64088b232bb3	Bacteria	0.00225684	-1737.78	-1737.79	0.898032	1	bASV677|Paracoccus	Alphaproteobacteria	Rhodobacterales	Rhodobacteraceae	Paracoccus	NA	NA	Urticaceae	NA
bASV4274	008fcd920be9f3dd9f93e0380c4e49f9	Bacteria	0.070117	-1614.72	-1616.14	0.0920923	0.308436	bASV4274|Nitrospira	Nitrospiria	Nitrospirales	Nitrospiraceae	Nitrospira	NA	Myrtales	Myrtaceae	Alocasia
bASV368	48a4e06b16ee06873ed1fd6331558dd2	Bacteria	7.33137e-05	-1790.63	-1790.63	1	1	bASV368|Burkholderia-Caballeronia-Paraburkholderia	Gammaproteobacteria	Burkholderiales	Burkholderiaceae	Burkholderia-Caballeronia-Paraburkholderia	NA	NA	Urticaceae	Heptapleurum
bASV3603	8fdb24979206e9084425459dc501ec2e	Bacteria	0.0300264	-1679.75	-1680.91	0.127705	0.378927	bASV3603|Gemmatimonadaceae	Gemmatimonadetes	Gemmatimonadales	Gemmatimonadaceae		NA	NA	Myrtaceae	Alocasia
bASV1677	4498e2c5f1e89ea98ef79db49601b41c	Bacteria	0.0438224	-1716.47	-1718.18	0.0649253	0.246156	bASV1677|Ilumatobacteraceae	Acidimicrobiia	Microtrichales	Ilumatobacteraceae		NA	Myrtales	Myrtaceae	Fagraea
bASV29	f429e5c0bbb1b63efec4340c92c00502	Bacteria	7.33137e-05	-1528.85	-1528.84	1	1	bASV29|Ensifer	Alphaproteobacteria	Rhizobiales	Rhizobiaceae	Ensifer	Others	Sapindales	Asteraceae	Brassaiopsis
bASV2585	7babda1c5ad3b1e6689ce31f9343cded	Bacteria	7.33137e-05	-1736.17	-1736.17	1	1	bASV2585|Rhodospirillaceae_bacterium	Alphaproteobacteria				NA	Fabales	Urticaceae	NA
bASV136	3cb024799035c23e235b44b3e9630435	Bacteria	0.00772409	-1829.62	-1829.65	0.817742	1	bASV136|Conexibacter	Thermoleophilia	Solirubrobacterales	Solirubrobacteraceae	Conexibacter	Pinopsida	Others	Poaceae	Horsfieldia
bASV2362	a5cb31d768c23bc19a8110e69801a668	Bacteria	0.0300018	-1720.29	-1720.72	0.350743	0.721431	bASV2362|metagenome	Acidimicrobiia				NA	Others	Poaceae	Horsfieldia
bASV2936	563341ba12c225ddcbab4373f92b697f	Bacteria	0.0380346	-1657.04	-1658.09	0.148081	0.417995	bASV2936|SC-I-84	Gammaproteobacteria	Burkholderiales	SC-I-84	SC-I-84	NA	Rosales	Phyllanthaceae	Fagraea
bASV2635	53b72cc1af6ec2350099eb3c3e957385	Bacteria	0.0153362	-1717.97	-1718.5	0.302382	0.650494	bASV2635|Xanthobacteraceae	Alphaproteobacteria	Rhizobiales	Xanthobacteraceae		NA	Asparagales	Phyllanthaceae	Brassaiopsis
bASV3532	b76d94ed4f81195437d4a1af4153f34a	Bacteria	0.100896	-1724.33	-1724.16	1	1	bASV3532|Pedosphaeraceae	Verrucomicrobiae	Pedosphaerales	Pedosphaeraceae		NA	Arecales	Lamiaceae	Pandanus
bASV3245	a4256f388cef938937d1e6d2f9b8795d	Bacteria	7.33137e-05	-1721.3	-1721.3	1	1	bASV3245|Bacteria					Polypodiopsida	NA	Lamiaceae	Musa
bASV134	a0e96bc9263c5d796920308cb2f9705d	Bacteria	7.33137e-05	-1808.61	-1808.61	1	1	bASV134|Gaiella	Thermoleophilia	Gaiellales	Gaiellaceae	Gaiella	NA	Lamiales	Araceae	Alocasia
bASV297	7498661b653879f1cc945f8e7d716a32	Bacteria	0.0709299	-1783.57	-1787.02	0.0086153	0.0760068	bASV297|Hyphomicrobiaceae	Alphaproteobacteria	Rhizobiales	Hyphomicrobiaceae		NA	Others	Urticaceae	Horsfieldia
bASV1695	8fb562976324559518d195ef8a6394dd	Bacteria	0.13384	-1697.78	-1702.69	0.001723	0.0301155	bASV1695|Paenibacillus_turicensis	Bacilli	Paenibacillales	Paenibacillaceae	Paenibacillus	NA	Arecales	Acanthaceae	Alocasia
bASV1915	60367126342afd46bcde4fab6a51d83c	Bacteria	0.0163323	-1683.24	-1683.43	0.540661	0.95731	bASV1915|Pseudoxanthomonas	Gammaproteobacteria	Xanthomonadales	Xanthomonadaceae	Pseudoxanthomonas	NA	NA	Acanthaceae	Brassaiopsis
bASV6028	4eadcd8b302eeaf250df37cb303c9ea7	Bacteria	0.0776125	-1637.79	-1638.68	0.182401	0.468396	bASV6028|Acidobacteriae	Acidobacteriae				NA	Rosales	Urticaceae	Begonia
bASV506	5d28c718b32f66cd67ece1f99013fb47	Bacteria	0.0725872	-1773.16	-1776.53	0.00944393	0.0797683	bASV506|Bradyrhizobium_sp.	Alphaproteobacteria	Rhizobiales	Xanthobacteraceae		NA	Rosales	Myrtaceae	Alocasia
bASV2921	469f873922354c5935fbbe7750177d86	Bacteria	0.0340717	-1704.81	-1705.22	0.367731	0.743092	bASV2921|S0134_terrestrial_group	S0134_terrestrial_group	S0134_terrestrial_group	S0134_terrestrial_group	S0134_terrestrial_group	NA	Malpighiales	Acanthaceae	Alocasia
bASV1307	6b405f8e45dddec4798e4faae7555195	Bacteria	0.0030833	-1672.24	-1672.24	0.95838	1	bASV1307|Occallatibacter	Acidobacteriae	Acidobacteriales	Acidobacteriaceae_(Subgroup_1)	Occallatibacter	Others	Arecales	Poaceae	Lagerstroemia
bASV1643	24ce0f2c4e2dfdaf150fedebd4b88ad8	Bacteria	0.117181	-1717.92	-1719.11	0.122913	0.371378	bASV1643|Xanthobacteraceae	Alphaproteobacteria	Rhizobiales	Xanthobacteraceae		Others	Malvales	Zingiberaceae	Musa
bASV711	3c19c7d32c92be1d9af5c2f7b157d290	Bacteria	0.0716764	-1790.25	-1790.33	0.696714	1	bASV711|ADurb.Bin063-1	Verrucomicrobiae	Pedosphaerales	Pedosphaeraceae	ADurb.Bin063-1	Polypodiopsida	Others	Urticaceae	Musa
bASV593	a0c233e0df10da8e521736a87c1eebb8	Bacteria	0.0494705	-1794.93	-1795.19	0.471444	0.877143	bASV593|uncultured_bacterium	Alphaproteobacteria				NA	Arecales	Urticaceae	Mycetia
bASV1554	f86c51ab3887a8ba222fbddb3767756a	Bacteria	0.243182	-1757.28	-1763.53	0.000404306	0.0130925	bASV1554|Microtrichales	Acidimicrobiia	Microtrichales			NA	Lamiales	Urticaceae	Mycetia
bASV1597	a4c2e2aa1768d7fc224d7f76799d298b	Bacteria	0.059892	-1613.77	-1616.76	0.014375	0.102818	bASV1597|Oxalobacteraceae	Gammaproteobacteria	Burkholderiales	Oxalobacteraceae		NA	NA	NA	Alocasia
bASV4537	f7825b47bc4d030520c288579fd6b9dc	Bacteria	0.0325997	-1656.65	-1656.91	0.473715	0.879359	bASV4537|uncultured_bacterium	Alphaproteobacteria	Rhizobiales	Beijerinckiaceae	Microvirga	NA	NA	Arecaceae	Alocasia
bASV2285	47888c6d975ebcc98694b30831447581	Bacteria	7.33137e-05	-1677.47	-1677.47	1	1	bASV2285|uncultured_bacterium	Thermoleophilia				NA	Arecales	Arecaceae	NA
bASV124	39c7c7a5f373336b86ef141cbb3df166	Bacteria	0.198368	-1831.19	-1835.47	0.00341079	0.0442878	bASV124|uncultured_prokaryote	Thermoleophilia	Gaiellales			NA	Sapindales	Meliaceae	Pandanus
bASV67	64fbf64c1eba8ce7b66ba760a2515a3e	Bacteria	0.0134026	-1818.92	-1819.25	0.414992	0.807655	bASV67|Enterobacterales	Gammaproteobacteria	Enterobacterales			NA	NA	Araliaceae	Brassaiopsis
bASV3743	33811549704064d673540592bd4ca321	Bacteria	7.33137e-05	-1696.62	-1696.62	1	1	bASV3743|Bryobacter	Acidobacteriae	Bryobacterales	Bryobacteraceae	Bryobacter	NA	NA	Urticaceae	Pterospermum
bASV1320	ae38aedab721b1d193bdd21e310e008b	Bacteria	7.33137e-05	-1748.71	-1748.71	1	1	bASV1320|Micromonosporaceae	Actinobacteria	Micromonosporales	Micromonosporaceae		NA	NA	Meliaceae	Bauhinia
bASV517	70106462c62ec16d8d9fe9f08da09dae	Bacteria	0.0503897	-1665.85	-1667.45	0.0736505	0.267551	bASV517|Agrobacterium_larrymoorei	Alphaproteobacteria	Rhizobiales	Rhizobiaceae	Allorhizobium-Neorhizobium-Pararhizobium-Rhizobium	NA	Fabales	Asteraceae	NA
bASV1265	f185f8a5e31eef3443bf2c4ac1474ade	Bacteria	7.33137e-05	-1674.51	-1674.5	1	1	bASV1265|uncultured_Acidobacteria	Acidobacteriae	Subgroup_2	Subgroup_2	Subgroup_2	NA	Malvales	Poaceae	Horsfieldia
bASV1512	854858d8254e762c99858f05dc58d399	Bacteria	7.33137e-05	-1751.19	-1751.19	1	1	bASV1512|uncultured_Alphaproteobacteria	Alphaproteobacteria	Puniceispirillales	Puniceispirillales	Puniceispirillales	NA	Malpighiales	Myrtaceae	Bauhinia
bASV1327	ceacbf50b011fa4db9691f7d1cc77a22	Bacteria	0.112306	-1775.37	-1776.87	0.0834886	0.290375	bASV1327|uncultured_bacterium	Thermoleophilia				NA	Arecales	Acanthaceae	Mycetia
bASV3411	1060e9c6276cc2b22a4754b466c5af7b	Bacteria	7.33137e-05	-1673.8	-1673.8	1	1	bASV3411|Micropepsaceae	Alphaproteobacteria	Micropepsales	Micropepsaceae		Polypodiopsida	Rosales	Urticaceae	NA
bASV1356	62f2aca6ec72f9cc019ed655153962cf	Bacteria	0.0879271	-1754.54	-1755.6	0.145859	0.413567	bASV1356|Acidibacter	Gammaproteobacteria	Gammaproteobacteria_Incertae_Sedis	Unknown_Family	Acidibacter	NA	Myrtales	Meliaceae	Fagraea
bASV2027	38be9d73972efca23eb0e00238512a0a	Bacteria	7.33137e-05	-1718.54	-1718.53	1	1	bASV2027|uncultured_Rhodospirillales	Alphaproteobacteria	Reyranellales	Reyranellaceae		NA	NA	Acanthaceae	Pterospermum
bASV800	cc05b0f37ed59f672b54ee7ccb865e6b	Bacteria	0.073695	-1785.85	-1788.39	0.024159	0.140622	bASV800|Gaiellales	Thermoleophilia	Gaiellales			NA	Malpighiales	Myrtaceae	Alocasia
bASV388	1923cdea2aeaf7d241f0f3fbab0253b0	Bacteria	0.129965	-1793.35	-1793.78	0.356631	0.729983	bASV388|Gaiellales	Thermoleophilia	Gaiellales			NA	Sapindales	Meliaceae	NA
bASV12	0aea64e207a9bdfb61483f4def68e499	Bacteria	7.33137e-05	-1525.95	-1525.95	1	1	bASV12|Allorhizobium-Neorhizobium-Pararhizobium-Rhizobium	Alphaproteobacteria	Rhizobiales	Rhizobiaceae	Allorhizobium-Neorhizobium-Pararhizobium-Rhizobium	NA	NA	Asteraceae	Excoecaria
bASV2278	6748dad132ac8b7094ddd5e383662c1b	Bacteria	0.0910861	-1725.42	-1730.48	0.00147585	0.0278013	bASV2278|metagenome	vadinHA49	vadinHA49	vadinHA49	vadinHA49	NA	Arecales	Lamiaceae	Dypsis
bASV3194	89cd35cd5350753d1f852b2ade9e844b	Bacteria	0.0547684	-1714.03	-1715.98	0.0479554	0.204391	bASV3194|metagenome	Alphaproteobacteria	Acetobacterales	Acetobacteraceae		Others	Rosales	Myrtaceae	Fagraea
bASV645	14fbf5d8e920aa79fb017e09f9e3a779	Bacteria	7.33137e-05	-1743.67	-1743.67	1	1	bASV645|Bradyrhizobium	Alphaproteobacteria	Rhizobiales	Xanthobacteraceae	Bradyrhizobium	NA	Arecales	Arecaceae	NA
bASV589	645cd2a049df60e21c4dd109196d9df3	Bacteria	0.227108	-1773.21	-1777.99	0.00199192	0.0319211	bASV589|Bosea	Alphaproteobacteria	Rhizobiales	Beijerinckiaceae	Bosea	NA	NA	Urticaceae	Mycetia
bASV3559	59fcfb4621fd8a49b36471cd3ed5d0a3	Bacteria	7.33137e-05	-1653.01	-1653	1	1	bASV3559|metagenome					NA	NA	Myrtaceae	Alocasia
bASV3024	eccd31465a9cc13e41b54fdbc80da0cb	Bacteria	7.33137e-05	-1704.46	-1704.46	1	1	bASV3024|Jatrophihabitans	Actinobacteria	Frankiales	Frankiaceae	Jatrophihabitans	NA	Rosales	NA	Fagraea
bASV4661	6911d00c2b4f26e46644c9c4d85d6f7a	Bacteria	0.0283606	-1639.65	-1640.27	0.267319	0.596043	bASV4661|Microtrichales	Acidimicrobiia	Microtrichales			NA	Myrtales	Myrtaceae	Alocasia
bASV2534	7a4b50091e1f7a14765fdf52f7e9c9bd	Bacteria	7.33137e-05	-1681.51	-1681.51	1	1	bASV2534|Bryobacter	Acidobacteriae	Bryobacterales	Bryobacteraceae	Bryobacter	NA	Malvales	Poaceae	Lagerstroemia
bASV5113	cafd085e37df624fc98bdcf2b17353c1	Bacteria	0.0150246	-1630.26	-1630.88	0.268348	0.596973	bASV5113|uncultured_bacterium	Bacteroidia	Sphingobacteriales	AKYH767	AKYH767	NA	Arecales	Myrtaceae	Alocasia
bASV2425	a2922d74de3e6db6530950a36eec4f1d	Bacteria	0.0712587	-1728.35	-1729.94	0.0749633	0.27117	bASV2425|Gaiella	Thermoleophilia	Gaiellales	Gaiellaceae	Gaiella	NA	Lamiales	Urticaceae	Mycetia
bASV4817	6d41610af74871c84c6e3e679a3a5386	Bacteria	7.33137e-05	-1647.51	-1647.5	1	1	bASV4817|uncultured_Solirubrobacter	Thermoleophilia	Gaiellales			NA	NA	Poaceae	NA
bASV1562	696b2771e183d4d1bfe4afc2e269e50c	Bacteria	0.182394	-1733.61	-1749.57	1.60534e-08	1.80992e-05	bASV1562|Sphingomonadaceae	Alphaproteobacteria	Sphingomonadales	Sphingomonadaceae		NA	Myrtales	Myrtaceae	Syzygium
bASV4162	e345b676a68710b67793a4708eab48c4	Bacteria	7.33137e-05	-1650.78	-1650.77	1	1	bASV4162|uncultured_bacterium	Clostridia	Clostridiales	Caloramatoraceae	Fonticella	NA	Malvales	Poaceae	Pterospermum
bASV454	6b4a94c1b2dee45e4c87ced2e58fc609	Bacteria	7.33137e-05	-1539.23	-1539.23	1	1	bASV454|Labrys	Alphaproteobacteria	Rhizobiales	Labraceae	Labrys	NA	NA	Urticaceae	NA
bASV8	49c87ddfdb4c162c52838c414dc2fb34	Bacteria	0.185013	-1681.24	-1688.03	0.000228417	0.00980054	bASV8|Bacillus	Bacilli	Bacillales	Bacillaceae	Bacillus	Others	Arecales	Arecaceae	Pandanus
bASV1335	d577a27d8d6dbb202508848888d1a44f	Bacteria	0.0103384	-1731.79	-1731.92	0.608449	1	bASV1335|Bryobacter	Acidobacteriae	Bryobacterales	Bryobacteraceae	Bryobacter	Pinopsida	Arecales	Arecaceae	Lagerstroemia
bASV534	72095bcbefec5691767ddecf7c864355	Bacteria	0.0202223	-1767.83	-1767.89	0.723977	1	bASV534|Arthrobacter_globiformis	Actinobacteria	Micrococcales	Micrococcaceae	Arthrobacter	NA	Arecales	Asteraceae	Brassaiopsis
bASV1388	5d5edde86a39ca75c0dc3e48f21c28de	Bacteria	7.33137e-05	-1724.68	-1724.67	1	1	bASV1388|uncultured_bacterium	Gammaproteobacteria	Burkholderiales	B1-7BS	B1-7BS	NA	NA	NA	Brassaiopsis
bASV608	93d513d4c0a7a255bd4a07a56a0c7ef6	Bacteria	7.33137e-05	-1789.43	-1789.43	1	1	bASV608|uncultured_Rubrobacterales	Thermoleophilia	Gaiellales			NA	NA	Meliaceae	Fagraea
bASV5420	e4d9598108edd543610968272b9dfdb0	Bacteria	0.0193955	-1640.8	-1641.12	0.421296	0.818039	bASV5420|Microtrichales	Acidimicrobiia	Microtrichales			NA	Myrtales	Myrtaceae	Caryota
bASV891	f86b98e04761b2917033d355b8e7703a	Bacteria	0.058868	-1729.92	-1730.19	0.461093	0.871259	bASV891|bacterium_Ellin334	Actinobacteria	Frankiales	Acidothermaceae	Acidothermus	NA	Myrtales	Poaceae	Horsfieldia
bASV361	8c3e9039c48b4eecd8aeb4fbf24385fd	Bacteria	0.0113132	-1796.01	-1796.39	0.378039	0.759076	bASV361|Mesorhizobium	Alphaproteobacteria	Rhizobiales	Rhizobiaceae	Mesorhizobium	NA	Asparagales	Euphorbiaceae	Lagerstroemia
bASV1139	1c694cac45f0050f0f68c94f5f86f842	Bacteria	0.0422464	-1753.96	-1755.69	0.06312	0.242989	bASV1139|Nocardioides	Actinobacteria	Propionibacteriales	Nocardioidaceae	Nocardioides	NA	Rosales	Apocynaceae	Alocasia
bASV222	43d2dd20f7f7356e9981ea3e22995f7f	Bacteria	0.0720103	-1785.44	-1787.31	0.0528893	0.217749	bASV222|Gaiellales	Thermoleophilia	Gaiellales			NA	Lamiales	Urticaceae	Mycetia
bASV155	e4baab4791f7f5304377084f88483a2b	Bacteria	0.0176063	-1769.46	-1770.07	0.268544	0.596973	bASV155|Enterobacterales	Gammaproteobacteria	Enterobacterales			NA	NA	Asteraceae	Brassaiopsis
bASV4377	ff8f1c5aaf487f35174a19181fa4789d	Bacteria	0.00147894	-1690.83	-1690.83	0.964534	1	bASV4377|bacterium_Ellin6517	Thermoleophilia	Gaiellales			NA	Arecales	Myrtaceae	Bauhinia
bASV940	e35649f53d41ab337d675e91d20bb92d	Bacteria	7.33137e-05	-1784.95	-1784.95	1	1	bASV940|MND1	Gammaproteobacteria	Burkholderiales	Nitrosomonadaceae	MND1	NA	Arecales	Myrtaceae	Pandanus
bASV620	165ef5fd8aab33ae00662d2104a958d8	Bacteria	0.0369946	-1800.65	-1801.6	0.168374	0.449827	bASV620|uncultured_Rhodospirillaceae	Alphaproteobacteria				NA	Others	Urticaceae	Mycetia
bASV1334	0cee622abc4e31dd4300caaef6a6a84f	Bacteria	0.0291737	-1726.22	-1727.55	0.102381	0.33107	bASV1334|uncultured_gamma	Gammaproteobacteria	Burkholderiales	TRA3-20	TRA3-20	NA	Arecales	Myrtaceae	Alocasia
bASV348	ffdb89f649d46ee2bc1bd9a2990858a0	Bacteria	0.0190253	-1733.63	-1734.05	0.359655	0.732619	bASV348|TRA3-20	Gammaproteobacteria	Burkholderiales	TRA3-20	TRA3-20	NA	Malpighiales	Urticaceae	Alocasia
bASV3336	d8340cac69ae90f1105db885b5156656	Bacteria	0.00236834	-1720	-1720.01	0.938367	1	bASV3336|uncultured_bacterium	Alphaproteobacteria				NA	NA	Euphorbiaceae	Bauhinia
bASV3303	0c93d6efc4374b232168966b3a391232	Bacteria	0.055119	-1700.61	-1701.92	0.105268	0.336537	bASV3303|Iamia	Acidimicrobiia	Microtrichales	Iamiaceae	Iamia	NA	Myrtales	Myrtaceae	Alocasia
bASV614	4274194ccffd2690406d4c3d5680cd43	Bacteria	0.0757972	-1779.49	-1780.47	0.162771	0.441574	bASV614|Fictibacillus	Bacilli	Bacillales	Bacillaceae	Fictibacillus	NA	Arecales	Myrtaceae	Brassaiopsis
bASV1445	9b8771e245ae51ab1675536df65f2ffe	Bacteria	0.162898	-1682.67	-1682.48	1	1	bASV1445|Acidobacteriales	Acidobacteriae	Acidobacteriales			Pinopsida	Malvales	Poaceae	Horsfieldia
bASV363	9055e60c355f671430ad91d8143bbd99	Bacteria	7.33137e-05	-1789.32	-1789.32	1	1	bASV363|Xanthomonadaceae	Gammaproteobacteria	Xanthomonadales	Xanthomonadaceae		NA	NA	Araliaceae	Mycetia
bASV2139	9e5ed7600ee7f3a4ff4e2a541a0573c6	Bacteria	0.0422611	-1752.94	-1754.04	0.138206	0.400387	bASV2139|Bryobacter	Acidobacteriae	Bryobacterales	Bryobacteraceae	Bryobacter	NA	NA	Myrtaceae	Alocasia
bASV1663	45d06829f74e63bdf2161b17f3049f31	Bacteria	7.33137e-05	-1707.57	-1707.57	1	1	bASV1663|uncultured_bacterium	Alphaproteobacteria	Micropepsales	Micropepsaceae		Others	Malvales	Poaceae	NA
bASV1277	de573ad465ebbcf8d1815adbde2ab25f	Bacteria	0.059401	-1773.33	-1774.51	0.124971	0.375804	bASV1277|Acidobacteriales	Acidobacteriae	Acidobacteriales			NA	NA	Urticaceae	Begonia
bASV1032	6c2a99862d1a77fbc4fe5018ab704c75	Bacteria	7.33137e-05	-1742.42	-1742.41	1	1	bASV1032|Xanthobacteraceae	Alphaproteobacteria	Rhizobiales	Xanthobacteraceae		NA	Arecales	Poaceae	Horsfieldia
bASV201	8d23d171692b7d467c0475d7b55a683b	Bacteria	0.174631	-1770.6	-1774.74	0.00399415	0.0477037	bASV201|Variovorax_soli	Gammaproteobacteria	Burkholderiales	Comamonadaceae	Variovorax	NA	Fabales	Asteraceae	Brassaiopsis
bASV1035	a99c3651e0c0681f7d4db4b2dd1368bd	Bacteria	0.151639	-1769.19	-1771.96	0.0186467	0.120952	bASV1035|Candidatus_Solibacter	Acidobacteriae	Solibacterales	Solibacteraceae	Candidatus_Solibacter	NA	Malvales	NA	Horsfieldia
bASV1162	0dbcde74f117701313ca7b67ab8a7f0c	Bacteria	0.149331	-1774.96	-1776.16	0.122584	0.37127	bASV1162|Rhizobiales	Alphaproteobacteria	Rhizobiales			NA	NA	Myrtaceae	Alocasia
bASV503	f0b5a471dc2b186f554ee894edb93640	Bacteria	7.33137e-05	-1777.09	-1777.09	1	1	bASV503|Allorhizobium-Neorhizobium-Pararhizobium-Rhizobium	Alphaproteobacteria	Rhizobiales	Rhizobiaceae	Allorhizobium-Neorhizobium-Pararhizobium-Rhizobium	NA	NA	Arecaceae	Dypsis
bASV1442	f50df495220bb3d8440a21cd50cec620	Bacteria	0.0346556	-1707.72	-1708.09	0.385355	0.767678	bASV1442|ADurb.Bin063-1	Verrucomicrobiae	Pedosphaerales	Pedosphaeraceae	ADurb.Bin063-1	Others	Malvales	Poaceae	Lagerstroemia
bASV52	73bff6135500b695fbe1a85534ee69d2	Bacteria	7.33137e-05	-1739.47	-1739.47	1	1	bASV52|Ochrobactrum	Alphaproteobacteria	Rhizobiales	Rhizobiaceae	Ochrobactrum	NA	Lamiales	Acanthaceae	Duranta
bASV419	d1468d2e99431c22bf988b380df7c27f	Bacteria	0.0613922	-1714.77	-1715.32	0.296096	0.639688	bASV419|Pseudomonas	Gammaproteobacteria	Pseudomonadales	Pseudomonadaceae	Pseudomonas	NA	NA	Urticaceae	Caryota
bASV1381	57f0c197f94eabdaac6233c8731f5245	Bacteria	0.0471739	-1760.46	-1762.12	0.0689561	0.256383	bASV1381|IMCC26256	Acidimicrobiia	IMCC26256	IMCC26256	IMCC26256	NA	Myrtales	Myrtaceae	Alocasia
bASV828	3c79fdae990f03963c1ee15a89d1893d	Bacteria	7.33137e-05	-1778.44	-1778.44	1	1	bASV828|uncultured_Hyphomicrobiaceae	Alphaproteobacteria	Rhizobiales	Xanthobacteraceae		NA	Sapindales	Myrtaceae	Fagraea
bASV3588	f8439b632620d86b2b6f9c184751081b	Bacteria	7.33137e-05	-1703.08	-1703.07	1	1	bASV3588|NB1-j	NB1-j	NB1-j	NB1-j	NB1-j	NA	Arecales	Lamiaceae	Caryota
bASV128	913623b3a3539e8058491ac6a3b37af4	Bacteria	7.33137e-05	-1643.73	-1643.73	1	1	bASV128|metagenome					NA	Asparagales	Myrtaceae	Mycetia
bASV2121	70a16a6c1e063616959d466d3c310604	Bacteria	7.33137e-05	-1707.86	-1707.85	1	1	bASV2121|Actinophytocola_sp.	Actinobacteria	Pseudonocardiales	Pseudonocardiaceae	Actinophytocola	Others	NA	Myrtaceae	NA
bASV1534	bf1c75efba314a6afd2f88b1790ba2f2	Bacteria	7.33137e-05	-1746.17	-1746.17	1	1	bASV1534|Alphaproteobacteria	Alphaproteobacteria				Others	Arecales	Urticaceae	Excoecaria
bASV1853	fe2e8c1f91b705dc92b9579ba338136e	Bacteria	0.19764	-1749.11	-1755.96	0.000213833	0.00949867	bASV1853|uncultured_proteobacterium	Subgroup_22	Subgroup_22	Subgroup_22	Subgroup_22	NA	Asparagales	Urticaceae	Alocasia
bASV834	83f5dc3ef068ffa57eedf9628c8f071c	Bacteria	0.00893692	-1781.02	-1781.18	0.571102	0.998604	bASV834|Comamonadaceae	Gammaproteobacteria	Burkholderiales	Comamonadaceae		NA	Myrtales	Myrtaceae	Fagraea
bASV3231	9ba7101dc2db5fa9a5bbd463c8cae56f	Bacteria	7.33137e-05	-1673.08	-1673.08	1	1	bASV3231|Acidimicrobiia	Acidimicrobiia				NA	NA	Myrtaceae	Pandanus
bASV2199	b7398b17950bf9ba1921249e8495c2ed	Bacteria	0.151115	-1682.09	-1685.75	0.00683331	0.0675857	bASV2199|uncultured_bacterium	Actinobacteria	Frankiales	Acidothermaceae	Acidothermus	NA	Sapindales	Meliaceae	NA
bASV578	556ef087a43fc8532bae07712c5d3302	Bacteria	0.0879611	-1812	-1813.49	0.0841908	0.292416	bASV578|uncultured_Methylocystaceae	Alphaproteobacteria	Rhizobiales	Xanthobacteraceae		Polypodiopsida	Others	Urticaceae	Mycetia
bASV1096	7dafef5bd712256bb91013be3318a163	Bacteria	0.0705055	-1782.45	-1783.29	0.195726	0.492501	bASV1096|uncultured_bacterium	Thermoleophilia	Gaiellales			NA	Sapindales	Meliaceae	Alocasia
bASV1423	3b94fe782c8977d323fddc5f30c47fdc	Bacteria	0.0973465	-1747.14	-1750.4	0.0106588	0.0851359	bASV1423|Promicromonospora	Actinobacteria	Micrococcales	Promicromonosporaceae	Promicromonospora	NA	Lamiales	Lamiaceae	Alocasia
bASV3246	282be3b191f8347a97c6ad8bd0a3adf0	Bacteria	0.071416	-1686.18	-1689.19	0.0140556	0.101392	bASV3246|Pedosphaeraceae	Verrucomicrobiae	Pedosphaerales	Pedosphaeraceae	Pedosphaeraceae	NA	Rosales	Myrtaceae	Alocasia
bASV2183	4c95ccdaeca75fa8cfd59a09932d9f8b	Bacteria	0.0672925	-1691.58	-1693.68	0.0402276	0.184522	bASV2183|beta_proteobacterium	Gammaproteobacteria	Burkholderiales	SC-I-84	SC-I-84	NA	Myrtales	Myrtaceae	Dypsis
bASV89	7f46fa849f9743c244435e37af5eb4fb	Bacteria	0.0382373	-1811.19	-1811.82	0.258449	0.584802	bASV89|Burkholderia-Caballeronia-Paraburkholderia	Gammaproteobacteria	Burkholderiales	Burkholderiaceae	Burkholderia-Caballeronia-Paraburkholderia	Others	Malvales	Poaceae	Fagraea
bASV538	ff5067199e42034e45a187b4b9a16745	Bacteria	0.17461	-1767.82	-1771	0.0116659	0.0896378	bASV538|Burkholderia-Caballeronia-Paraburkholderia	Gammaproteobacteria	Burkholderiales	Burkholderiaceae	Burkholderia-Caballeronia-Paraburkholderia	Others	Others	Poaceae	Horsfieldia
bASV6605	e2f072351cc63c22608a2d478505717e	Bacteria	0.00646861	-1646.78	-1646.84	0.739923	1	bASV6605|Bacteria					NA	Myrtales	Myrtaceae	NA
bASV122	a45bc17abe11bbf3e9bd6e5fb4a8d734	Bacteria	0.0339095	-1813.03	-1813.4	0.384862	0.767299	bASV122|Nocardioides	Actinobacteria	Propionibacteriales	Nocardioidaceae	Nocardioides	NA	Lamiales	Acanthaceae	Alocasia
bASV926	7cb2573c9431497b9005318ffe04c70f	Bacteria	0.079624	-1750.61	-1752.14	0.0804606	0.283117	bASV926|Paenibacillus	Bacilli	Paenibacillales	Paenibacillaceae	Paenibacillus	NA	Arecales	Acanthaceae	Brassaiopsis
bASV2495	3eb19fb4ec4f847bd0c3dfd3ae1d83bf	Bacteria	0.0561485	-1684.06	-1686.24	0.0368208	0.175117	bASV2495|Devosia	Alphaproteobacteria	Rhizobiales	Devosiaceae	Devosia	NA	Myrtales	Asteraceae	Caryota
bASV3763	1ee69f33740d48711359f9da35f7a87e	Bacteria	0.0550442	-1695.24	-1697.6	0.0300121	0.158603	bASV3763|uncultured_prokaryote	RCP2-54	RCP2-54	RCP2-54	RCP2-54	NA	Myrtales	Myrtaceae	Alocasia
bASV1184	67835f5f7c72c4a3c422b05477838482	Bacteria	0.24213	-1746.79	-1750.7	0.00515857	0.0567891	bASV1184|Desulfobacterota					NA	Sapindales	Urticaceae	Begonia
bASV550	f9dad88de4dd8022c231030973a4e35d	Bacteria	0.0566155	-1796.39	-1797.61	0.118533	0.36291	bASV550|uncultured_bacterium	Subgroup_5	Subgroup_5	Subgroup_5	Subgroup_5	NA	Myrtales	Myrtaceae	Magnolia
bASV246	0e5a85404aefd5e65cf453355ff29427	Bacteria	0.1119	-1797.09	-1801.41	0.00327592	0.0434274	bASV246|ADurb.Bin063-1	Verrucomicrobiae	Pedosphaerales	Pedosphaeraceae	ADurb.Bin063-1	NA	Myrtales	Myrtaceae	Alocasia
bASV168	f0d8f34dd827a910bb5d7c17a41ba420	Bacteria	0.0386742	-1659.86	-1661.07	0.120496	0.367054	bASV168|Xanthobacteraceae	Alphaproteobacteria	Rhizobiales	Xanthobacteraceae		NA	Rosales	Lamiaceae	Clerodendrum
bASV830	891b847cc111dff89e9227326a0982c5	Bacteria	0.0208284	-1785.6	-1785.85	0.476515	0.881971	bASV830|Ellin6067	Gammaproteobacteria	Burkholderiales	Nitrosomonadaceae	Ellin6067	NA	Arecales	Myrtaceae	Fagraea
bASV5547	1dcc82637907a7d252b4a6017e9bd6e1	Bacteria	7.33137e-05	-1676.67	-1676.67	1	1	bASV5547|Alphaproteobacteria	Alphaproteobacteria				NA	NA	Urticaceae	Fagraea
bASV2244	9119fa077db5b5263536709b4c982376	Bacteria	7.33137e-05	-1714.25	-1714.25	1	1	bASV2244|uncultured_bacterium	TK10	TK10	TK10	TK10	NA	NA	Araliaceae	Alocasia
bASV2241	cbcd7b93441c9c7304dcfbb66b5eabb5	Bacteria	0.00425582	-1702.75	-1702.83	0.690024	1	bASV2241|uncultured_Acidobacteriaceae	Acidobacteriae	Solibacterales	Solibacteraceae	Candidatus_Solibacter	Others	Malvales	Poaceae	Lagerstroemia
bASV1322	fb76970ce1f18e09adb0cd54df7b11a4	Bacteria	0.0758401	-1762.84	-1764.63	0.0582126	0.232162	bASV1322|uncultured_bacterium	Subgroup_11	Subgroup_11	Subgroup_11	Subgroup_11	NA	Lamiales	Urticaceae	Mycetia
bASV8287	61ce8a5b58ce6f849d44cf2e6172d877	Bacteria	7.33137e-05	-1625.11	-1625.1	1	1	bASV8287|metagenome	Alphaproteobacteria	Defluviicoccales			NA	NA	NA	Mycetia
bASV682	4ff80b81d406b5cb83510fd258197bc8	Bacteria	7.33137e-05	-1806.16	-1806.15	1	1	bASV682|uncultured_bacterium	Subgroup_5	Subgroup_5	Subgroup_5	Subgroup_5	Polypodiopsida	Others	Urticaceae	Musa
bASV1007	60c5a8094a4ddbd1e03a83b26fde6031	Bacteria	0.0246244	-1768.01	-1768.78	0.214311	0.518174	bASV1007|67-14	Thermoleophilia	Solirubrobacterales	67-14	67-14	NA	Rosales	Myrtaceae	Fagraea
bASV427	438280839dc29ef4ff390fb4cc2f5079	Bacteria	0.0946819	-1815	-1817.53	0.0244688	0.141348	bASV427|Microscillaceae	Bacteroidia	Cytophagales	Microscillaceae		NA	Arecales	Myrtaceae	Alocasia
bASV1057	23c0ebd42642bc63fc69e6219fa3e064	Bacteria	0.0957436	-1757.51	-1758.61	0.138997	0.401369	bASV1057|uncultured_Acidimicrobiia	Thermoleophilia	Gaiellales	Gaiellaceae	Gaiella	NA	Arecales	Apocynaceae	Pandanus
bASV391	531f12692b59371cba54e1113c1ddf0f	Bacteria	7.33137e-05	-1739.02	-1739.01	1	1	bASV391|RB41	Blastocatellia	Pyrinomonadales	Pyrinomonadaceae	RB41	NA	NA	NA	NA
bASV92	b509cf3b204a66b9bbac02f3d54b793a	Bacteria	0.0753558	-1776.41	-1777.21	0.206175	0.507446	bASV92|Gaiellales	Thermoleophilia	Gaiellales			NA	Arecales	Lamiaceae	Dypsis
bASV1284	c71388cc0c37232c92bd82078efd0e1d	Bacteria	7.33137e-05	-1735.88	-1735.88	1	1	bASV1284|uncultured_actinobacterium	Thermoleophilia	Gaiellales	Gaiellaceae	Gaiella	NA	Arecales	Arecaceae	Fagraea
bASV1141	cfba79bf81750b121d9817e0a519230a	Bacteria	7.33137e-05	-1729.34	-1729.33	1	1	bASV1141|Micromonosporaceae	Actinobacteria	Micromonosporales	Micromonosporaceae		Pinopsida	NA	NA	Pterospermum
bASV3621	6af40a8878cbd5a072f5048a27405aba	Bacteria	0.0315952	-1685.58	-1685.84	0.464383	0.873915	bASV3621|uncultured_bacterium	Verrucomicrobiae	Pedosphaerales	Pedosphaeraceae	Pedosphaeraceae	NA	Arecales	Arecaceae	Fagraea
bASV1123	0bb25c0723d68767df3c739f644fbc4b	Bacteria	7.33137e-05	-1753.65	-1753.65	1	1	bASV1123|uncultured_Acidobacteria	Acidobacteriae	Bryobacterales	Bryobacteraceae	Bryobacter	Polypodiopsida	Others	Zingiberaceae	Lagerstroemia
bASV1232	ef792b39c06aa5a083529565abc4d4a5	Bacteria	0.0425351	-1735.9	-1737.44	0.0795072	0.281556	bASV1232|uncultured_bacterium	Subgroup_5	Subgroup_5	Subgroup_5	Subgroup_5	NA	Myrtales	Myrtaceae	Pandanus
bASV1012	dbf005fdbca492f49f938df49f305c26	Bacteria	7.33137e-05	-1760.05	-1760.04	1	1	bASV1012|Vermiphilaceae	Babeliae	Babeliales	Vermiphilaceae	Vermiphilaceae	Polypodiopsida	NA	Zingiberaceae	Mycetia
bASV764	66f4c81fefaa6338074dd8b79e7669a2	Bacteria	0.270671	-1734.55	-1740.21	0.00076312	0.0199606	bASV764|Propionibacteriaceae	Actinobacteria	Propionibacteriales	Propionibacteriaceae		NA	Lamiales	Acanthaceae	Clerodendrum
bASV3266	12647699bc31dacb48a6b4c23a9eecdb	Bacteria	7.33137e-05	-1654.77	-1654.77	1	1	bASV3266|Acidobacteriales	Acidobacteriae	Acidobacteriales			Others	NA	Poaceae	NA
bASV3157	b7c4b8a4b22834c2c30e229d5d8b33ca	Bacteria	7.33137e-05	-1681.14	-1681.14	1	1	bASV3157|Burkholderiales	Gammaproteobacteria	Burkholderiales			NA	Arecales	Myrtaceae	Pandanus
bASV1062	51f8a40a0a73bf0a76d3050911048af0	Bacteria	0.0346401	-1755.86	-1756.12	0.468527	0.876553	bASV1062|Xanthobacteraceae	Alphaproteobacteria	Rhizobiales	Xanthobacteraceae		NA	Arecales	Lamiaceae	Alocasia
bASV4811	cdfb1a9b1a961060ea7d29d19e754676	Bacteria	7.33137e-05	-1645.21	-1645.21	1	1	bASV4811|Kibdelosporangium	Actinobacteria	Pseudonocardiales	Pseudonocardiaceae	Kibdelosporangium	NA	NA	NA	Brassaiopsis
bASV1705	ddc5a3df4e8326e7ed3db2ca4c136908	Bacteria	0.0279279	-1740.85	-1741.45	0.273907	0.605705	bASV1705|Pseudorhodoplanes	Alphaproteobacteria	Rhizobiales	Xanthobacteraceae	Pseudorhodoplanes	NA	NA	Acanthaceae	Alocasia
bASV3278	faee0ebfddae276b4194e55a0970d9d9	Bacteria	0.0374012	-1655.97	-1657.55	0.074968	0.27117	bASV3278|Microtrichales	Acidimicrobiia	Microtrichales			NA	Rosales	Myrtaceae	Fagraea
bASV653	4ef2a478e8161c520e53286d7e6b1e7c	Bacteria	0.0844275	-1781.56	-1785.2	0.00699777	0.0677408	bASV653|uncultured_soil	Actinobacteria	PeM15	PeM15	PeM15	NA	Arecales	Myrtaceae	Alocasia
bASV329	78afb33b9a79066097bbf11403d81df4	Bacteria	0.227586	-1810.95	-1814.7	0.0061982	0.0637961	bASV329|uncultured_bacterium	Gammaproteobacteria	PLTA13	PLTA13	PLTA13	NA	Sapindales	Urticaceae	Brassaiopsis
bASV4144	9c7f4f56399a9d001571d35c556ff081	Bacteria	0.168576	-1610.42	-1611.95	0.0802899	0.283117	bASV4144|Intrasporangiaceae	Actinobacteria	Micrococcales	Intrasporangiaceae		NA	NA	NA	Begonia
bASV13	21b5c2f4fa1a2e682f78ea6cf1447b44	Bacteria	0.0566718	-1789.41	-1791.02	0.0725237	0.265361	bASV13|Enterobacteriaceae	Gammaproteobacteria	Enterobacterales	Enterobacteriaceae		NA	NA	Araliaceae	NA
bASV1666	7ca81a8e2f30593e7c55697c58199767	Bacteria	0.0286607	-1722.36	-1722.35	1	1	bASV1666|Acidothermus	Actinobacteria	Frankiales	Acidothermaceae	Acidothermus	Pinopsida	Arecales	Poaceae	Podocarpus
bASV17	7832edb2ff9b6a67e3466386066fdbd4	Bacteria	0.22554	-1855.98	-1860.27	0.00339749	0.0442878	bASV17|Bacillus_mycoides	Bacilli	Bacillales	Bacillaceae	Bacillus	NA	Asparagales	Acanthaceae	Mycetia
bASV2932	8f4936a6465e04c0bbbc090f77f6449a	Bacteria	7.33137e-05	-1685.53	-1685.53	1	1	bASV2932|Asticcacaulis	Alphaproteobacteria	Caulobacterales	Caulobacteraceae	Asticcacaulis	NA	NA	Asteraceae	Alocasia
bASV2457	f6160e8f403fc4235b5eeb684366b309	Bacteria	0.0881041	-1742.86	-1747.19	0.00323209	0.0430718	bASV2457|uncultured_Myxococcales	NB1-j	NB1-j	NB1-j	NB1-j	Magnoliopsida	Rosales	Moraceae	Alocasia
bASV14085	55d5c971aee5c989c91c59336d3b5c62	Bacteria	0.0432579	-1588.25	-1589.24	0.161137	0.439605	bASV14085|Alphaproteobacteria	Alphaproteobacteria				NA	NA	Araceae	Alocasia
bASV2490	56c78058887ed931a3b0ae171e8625e3	Bacteria	0.0465718	-1726.96	-1729.06	0.0404465	0.184857	bASV2490|metagenome	Gammaproteobacteria	PLTA13	PLTA13	PLTA13	Others	Malvales	Moraceae	Codiaeum
bASV28	1d6d77ca7bc08da9c6c1d3526d7c0c26	Bacteria	0.0959525	-1794.9	-1797.54	0.0216411	0.131403	bASV28|Xanthobacteraceae	Alphaproteobacteria	Rhizobiales	Xanthobacteraceae		NA	Lamiales	Lamiaceae	Horsfieldia
bASV1251	d752b9dfb6b081c018d5afd6bdd919d3	Bacteria	7.33137e-05	-1764.9	-1764.9	1	1	bASV1251|Rhizocola	Actinobacteria	Micromonosporales	Micromonosporaceae	Rhizocola	NA	Arecales	Arecaceae	Bauhinia
bASV34	43a69ba85ef551fc0be25499aae3c249	Bacteria	0.0595301	-1742.68	-1744.41	0.0633032	0.242989	bASV34|Pseudomonas	Gammaproteobacteria	Pseudomonadales	Pseudomonadaceae	Pseudomonas	NA	Sapindales	Acanthaceae	Brassaiopsis
bASV676	221c31a813aae38aac1a2790d906fffe	Bacteria	0.0752401	-1777.31	-1779.69	0.0293221	0.15763	bASV676|Rhodanobacteraceae	Gammaproteobacteria	Xanthomonadales	Rhodanobacteraceae		NA	Others	Poaceae	Excoecaria
bASV340	5af195a7c87d45a7acbdeabfdb17ed2a	Bacteria	0.0162893	-1792.93	-1793.1	0.555165	0.978884	bASV340|Mesorhizobium	Alphaproteobacteria	Rhizobiales	Rhizobiaceae	Mesorhizobium	NA	NA	NA	Brassaiopsis
bASV1203	6aee904d6661f09cb1a3f0b050a7beef	Bacteria	7.33137e-05	-1764.09	-1764.09	1	1	bASV1203|Candidatus_Solibacter	Acidobacteriae	Solibacterales	Solibacteraceae	Candidatus_Solibacter	Polypodiopsida	NA	Lauraceae	Lagerstroemia
bASV401	15beaf5a1fa291ea828562444b305fed	Bacteria	0.127061	-1810.5	-1812.2	0.065497	0.247151	bASV401|uncultured_soil	Alphaproteobacteria				NA	Sapindales	Urticaceae	Mycetia
bASV1656	6869ffd3d3843ba550bbf76d908c4c7e	Bacteria	0.0259382	-1683.47	-1685.05	0.0756275	0.272001	bASV1656|Clostridium_sensu_stricto_1	Clostridia	Clostridiales	Clostridiaceae	Clostridium_sensu_stricto_1	Liliopsida	Arecales	Arecaceae	Fagraea
bASV2175	5bb4cfefc8e9656e90cc14f1d54cd25f	Bacteria	0.305203	-1727.06	-1731.43	0.00312331	0.0420651	bASV2175|Nocardioidaceae	Actinobacteria	Propionibacteriales	Nocardioidaceae		NA	NA	Urticaceae	Begonia
bASV1111	1a9a7503f42db519dd9ce8c32fe5f595	Bacteria	0.170316	-1748.86	-1750.61	0.0613827	0.239478	bASV1111|Solirubrobacter	Thermoleophilia	Solirubrobacterales	Solirubrobacteraceae	Solirubrobacter	NA	Lamiales	Lamiaceae	Lagerstroemia
bASV616	6fd7ce975476af6c5939195c55aa3bb3	Bacteria	7.33137e-05	-1765.38	-1765.37	1	1	bASV616|Aeromicrobium	Actinobacteria	Propionibacteriales	Nocardioidaceae	Aeromicrobium	NA	NA	Acanthaceae	Brassaiopsis
bASV125	91c3d2f4410268cf0b29f06f026c3b16	Bacteria	0.132618	-1699.22	-1701.01	0.0585584	0.232398	bASV125|metagenome	Thermoleophilia	Solirubrobacterales	Solirubrobacteraceae	Solirubrobacter	Pinopsida	Lamiales	Lamiaceae	Alocasia
bASV286	2a0201d948c7ed249af0a7748c875914	Bacteria	0.0444245	-1796.95	-1797.57	0.266839	0.596043	bASV286|uncultured_Acidimicrobiales	Acidimicrobiia	Microtrichales	Iamiaceae	Iamia	NA	Rosales	Myrtaceae	Alocasia
bASV3304	826eebe5b02dd4426936cb80039569c6	Bacteria	0.0389832	-1690.54	-1692.31	0.0594476	0.234457	bASV3304|Chitinophagaceae	Bacteroidia	Chitinophagales	Chitinophagaceae		NA	Gentianales	Acanthaceae	Mycetia
bASV1994	22ef2fd146dc27b05ee8bde26cdfebba	Bacteria	0.0116912	-1713.92	-1714	0.673652	1	bASV1994|metagenome	Bacteroidia	Chitinophagales	Chitinophagaceae	Puia	NA	Others	Acanthaceae	Musa
bASV371	003953bb0770c6a1f1e701f654a3356c	Bacteria	0.0436656	-1796.86	-1797.56	0.236587	0.554593	bASV371|TK10	TK10	TK10	TK10	TK10	Others	Arecales	Poaceae	Musa
bASV718	8e447d824486d4b1710b58034b9f0eb7	Bacteria	0.156838	-1795.65	-1799.19	0.00781275	0.0719342	bASV718|uncultured_Rubrobacteria	Thermoleophilia	Solirubrobacterales	67-14	67-14	Magnoliopsida	Lamiales	Myrtaceae	Alocasia
bASV144	d5a84d5134f1305919edcfdbb9c9ddde	Bacteria	0.214163	-1734.98	-1740.6	0.000795714	0.0201475	bASV144|Microbacterium	Actinobacteria	Micrococcales	Microbacteriaceae	Microbacterium	Magnoliopsida	Lamiales	Acanthaceae	Alocasia
bASV2661	cd33b7e6e25365e7c9013eb22f92cdd7	Bacteria	7.33137e-05	-1708.95	-1708.95	1	1	bASV2661|Afipia_sp.	Alphaproteobacteria	Rhizobiales	Xanthobacteraceae		NA	Myrtales	Myrtaceae	Fagraea
bASV633	c497806a3f887bf84fae89eab6248ab2	Bacteria	7.33137e-05	-1777.2	-1777.19	1	1	bASV633|NB1-j	NB1-j	NB1-j	NB1-j	NB1-j	NA	Arecales	Lamiaceae	Mycetia
bASV548	db88a61f131c90d59a72e76ed0801f30	Bacteria	0.0255658	-1757.34	-1758.42	0.141768	0.405143	bASV548|Streptomyces	Actinobacteria	Streptomycetales	Streptomycetaceae	Streptomyces	NA	Malvales	Meliaceae	NA
bASV51	0c372e3b45ab04d9fdfe6e677772797b	Bacteria	0.034855	-1754.77	-1756.05	0.109659	0.346349	bASV51|Pseudomonas_nitroreducens	Gammaproteobacteria	Pseudomonadales	Pseudomonadaceae	Pseudomonas	NA	NA	Acanthaceae	NA
bASV4122	bd1916246e8889f03a8c45cbd40ddb2f	Bacteria	0.216456	-1675.25	-1676.89	0.0704026	0.260784	bASV4122|Rhizobiales	Alphaproteobacteria	Rhizobiales			Polypodiopsida	NA	Urticaceae	Mycetia
bASV5540	75c32b69a4446f57e488b8b3bcbe8eaf	Bacteria	7.33137e-05	-1622.13	-1622.13	1	1	bASV5540|uncultured_bacterium	Fimbriimonadia	Fimbriimonadales	Fimbriimonadaceae	Fimbriimonadaceae	NA	NA	NA	NA
bASV2583	63a062f264a37b646ae1cf1fd8492b56	Bacteria	7.33137e-05	-1720.6	-1720.6	1	1	bASV2583|Clostridium_magnum	Clostridia	Clostridiales	Clostridiaceae	Clostridium_sensu_stricto_12	NA	Arecales	Arecaceae	Dypsis
bASV2333	b5f4053e9c51da8cd73be424a9156dea	Bacteria	0.244664	-1713.79	-1721.14	0.000125899	0.00664115	bASV2333|uncultured_bacterium	Actinobacteria	Frankiales	Frankiales	Frankiales	Polypodiopsida	Lamiales	Acanthaceae	Alocasia
bASV478	61048edd6caddbb2da26d5af8ce39893	Bacteria	7.33137e-05	-1745.91	-1745.91	1	1	bASV478|NB1-j	NB1-j	NB1-j	NB1-j	NB1-j	NA	Lamiales	Lamiaceae	NA
bASV3244	360552a85fa8b4ea768163946b24de47	Bacteria	0.0119096	-1684.89	-1685.1	0.520373	0.938451	bASV3244|uncultured_Alphaproteobacteria	Alphaproteobacteria	Rhizobiales	Xanthobacteraceae		NA	Sapindales	Phyllanthaceae	NA
bASV1435	976e028c89a5f1a568f2729c60971071	Bacteria	0.010762	-1715	-1715.12	0.617987	1	bASV1435|Rhizobiales	Alphaproteobacteria	Rhizobiales			Others	Sapindales	Urticaceae	Brassaiopsis
bASV5085	f566d721ce17ddd62d0a6df7d0e7ddd2	Bacteria	0.0675454	-1639.8	-1641.96	0.037679	0.175697	bASV5085|TK10	TK10	TK10	TK10	TK10	NA	Myrtales	Myrtaceae	NA
bASV4583	92ed1a13714ccc8761c45a6ce7621101	Bacteria	7.33137e-05	-1658.61	-1658.6	1	1	bASV4583|uncultured_bacterium	Chloroflexia	Chloroflexales	Chloroflexaceae	FFCH7168	NA	Lamiales	Meliaceae	Begonia
bASV3518	25e70439c01c818b1f9c0ba121f8b426	Bacteria	0.0645409	-1702.55	-1705.17	0.0218981	0.132125	bASV3518|uncultured_Bradyrhizobiaceae	Alphaproteobacteria	Rhizobiales	Xanthobacteraceae		NA	Arecales	Urticaceae	Alocasia
bASV310	9c0148234bb8793e5ef8a8cbe28d9ccd	Bacteria	0.135364	-1807.19	-1810.67	0.00840516	0.0751852	bASV310|Xanthobacteraceae	Alphaproteobacteria	Rhizobiales	Xanthobacteraceae		Polypodiopsida	Others	Urticaceae	Musa
bASV1329	888fe8c8d04a3b2777970bcf37402b83	Bacteria	0.0803141	-1765.17	-1768.54	0.00932798	0.0797683	bASV1329|uncultured_bacterium	MB-A2-108	MB-A2-108	MB-A2-108	MB-A2-108	NA	Myrtales	Myrtaceae	Alocasia
bASV2777	8e772b79d4364faa53c1761277b0b700	Bacteria	7.33137e-05	-1719.9	-1719.9	1	1	bASV2777|Phaselicystis	Polyangia	Polyangiales	Phaselicystidaceae	Phaselicystis	Pinopsida	Arecales	Poaceae	Musa
bASV1245	934c1a0d39bfada512dcaf4bd351e096	Bacteria	0.0215574	-1776.19	-1776.59	0.37014	0.746174	bASV1245|MBNT15	MBNT15	MBNT15	MBNT15	MBNT15	NA	Rosales	Myrtaceae	Alocasia
bASV2806	3f70438c1a83486a3a22ec05dc23f549	Bacteria	7.33137e-05	-1710.49	-1710.48	1	1	bASV2806|Hydrogenophaga	Gammaproteobacteria	Burkholderiales	Comamonadaceae	Hydrogenophaga	NA	Asparagales	Acanthaceae	Mycetia
bASV127	93f1c6fd70bae5d7f0c3586a5301e003	Bacteria	0.0484289	-1489.78	-1492.55	0.0185642	0.120952	bASV127|uncultured_Ferrimicrobium	Acidimicrobiia	IMCC26256	IMCC26256	IMCC26256	NA	Asparagales	Acanthaceae	Mycetia
bASV3405	57f87808352ab525a9e780527f1087fd	Bacteria	0.151252	-1679.12	-1680.16	0.149169	0.41922	bASV3405|uncultured_Acidobacteria	Acidobacteriae	Acidobacteriales			NA	Lamiales	Urticaceae	Begonia
bASV1357	8e3b858acab8f6d03e7c9103476dbbcd	Bacteria	0.0312496	-1749.41	-1749.84	0.353217	0.724753	bASV1357|uncultured_Dehalococcoidia	TK10	TK10	TK10	TK10	NA	NA	Lamiaceae	NA
bASV657	fd250b3f6be95b13848dcaf772279616	Bacteria	0.16848	-1722.52	-1724.57	0.0429541	0.191546	bASV657|Microtrichaceae	Acidimicrobiia	Microtrichales	Microtrichaceae		NA	Asparagales	Meliaceae	Bauhinia
bASV2492	854bab44360db97f7fdc43e331dbc2d5	Bacteria	0.0390072	-1683.15	-1685.74	0.0228553	0.136164	bASV2492|Elev-16S-1166	Acidobacteriae	Elev-16S-1166	Elev-16S-1166	Elev-16S-1166	NA	Rosales	Myrtaceae	Pandanus
bASV1219	8aa8fc96f5765ca2fdf02aec603bf370	Bacteria	7.33137e-05	-1738.17	-1738.16	1	1	bASV1219|uncultured_bacterium	Dehalococcoidia	S085	S085	S085	NA	Arecales	Lamiaceae	Pandanus
bASV385	7f679e21a1ee52590b0a1324eff3ad79	Bacteria	0.0049978	-1806.62	-1806.63	0.907265	1	bASV385|uncultured_Hyphomicrobiaceae	Alphaproteobacteria	Rhizobiales	Xanthobacteraceae		NA	Arecales	Urticaceae	NA
bASV1888	d0e4967a714e1d2ccb1d5bc09881b0c2	Bacteria	7.33137e-05	-1724.45	-1724.45	1	1	bASV1888|Desulfobacterota					NA	NA	Lauraceae	NA
bASV3004	2d71113fede808e54a35b626a75e7e3c	Bacteria	0.279695	-1655.68	-1662.45	0.00023224	0.00980054	bASV3004|Dokdonella	Gammaproteobacteria	Xanthomonadales	Rhodanobacteraceae	Dokdonella	NA	Arecales	Lamiaceae	Dypsis
bASV1015	cfda33494cb9f0bdf4f0f375bdcc108e	Bacteria	0.0276593	-1719.22	-1719.28	0.719661	1	bASV1015|Allorhizobium-Neorhizobium-Pararhizobium-Rhizobium	Alphaproteobacteria	Rhizobiales	Rhizobiaceae	Allorhizobium-Neorhizobium-Pararhizobium-Rhizobium	NA	Myrtales	Myrtaceae	Brassaiopsis
bASV2668	28f336aa33c7b0a0a2beb435fed337b1	Bacteria	0.0681281	-1737.95	-1739.12	0.12732	0.378817	bASV2668|metagenome	Alphaproteobacteria	Rhizobiales	Beijerinckiaceae	Microvirga	NA	Arecales	Acanthaceae	Fagraea
bASV544	51bbf0fc0897b248856dde8bcf194ecb	Bacteria	0.140109	-1711.74	-1713.57	0.0558158	0.226847	bASV544|Hyphomicrobium_zavarzinii	Alphaproteobacteria	Rhizobiales	Hyphomicrobiaceae	Hyphomicrobium	NA	NA	Acanthaceae	Alocasia
bASV4826	29f7e945b6f4f5b355638abab447f245	Bacteria	0.00841078	-1661.13	-1661.35	0.515508	0.932361	bASV4826|uncultured_bacterium	Actinobacteria	Micrococcales	Demequinaceae	Demequina	NA	Arecales	Urticaceae	Syzygium
bASV1022	a6121e743c3f728480e91921c21f6aab	Bacteria	0.0219508	-1785.57	-1786.14	0.283812	0.618959	bASV1022|Xanthobacteraceae	Alphaproteobacteria	Rhizobiales	Xanthobacteraceae		NA	Myrtales	Myrtaceae	Alocasia
bASV1102	5f8d8b45aad336fdf5adc62be1255a19	Bacteria	0.0829904	-1771.76	-1774.18	0.0275616	0.152705	bASV1102|Ilumatobacteraceae	Acidimicrobiia	Microtrichales	Ilumatobacteraceae		NA	Myrtales	Myrtaceae	Alocasia
bASV2036	af9f9c196dfe036103ee8a8c49bac486	Bacteria	7.33137e-05	-1685.63	-1685.62	1	1	bASV2036|Gaiella	Thermoleophilia	Gaiellales	Gaiellaceae	Gaiella	NA	Arecales	Arecaceae	Dypsis
bASV1805	9a7f9608e3ef4885979c96c0ffb85a31	Bacteria	0.0363861	-1690.28	-1692.36	0.04158	0.187332	bASV1805|uncultured_bacterium	Thermoleophilia	Solirubrobacterales	Solirubrobacteraceae	Conexibacter	NA	Gentianales	Rubiaceae	Mycetia
bASV2512	d17875e99747a4555f350325629ede02	Bacteria	0.0183854	-1665.67	-1666.06	0.380761	0.762727	bASV2512|Pseudonocardia	Actinobacteria	Pseudonocardiales	Pseudonocardiaceae	Pseudonocardia	NA	Arecales	Myrtaceae	Fagraea
bASV1914	6ae490cb1b6b32738ea62d89dde90291	Bacteria	0.40127	-1700.11	-1713.07	3.56435e-07	0.000100277	bASV1914|uncultured_beta	Gammaproteobacteria	Burkholderiales	Nitrosomonadaceae	966-1	NA	Lamiales	Urticaceae	Alocasia
bASV2070	fd54c344e5d1b6d7d44346b72411792c	Bacteria	7.33137e-05	-1707.72	-1707.72	1	1	bASV2070|uncultured_Rhodospirillaceae	Alphaproteobacteria	Elsterales			Polypodiopsida	Others	Zingiberaceae	Horsfieldia
bASV3176	43d1d53ef26fc840423583780413e772	Bacteria	0.0222312	-1700.38	-1700.84	0.337247	0.703965	bASV3176|Subgroup_10	Thermoanaerobaculia	Thermoanaerobaculales	Thermoanaerobaculaceae	Subgroup_10	NA	Rosales	Myrtaceae	Alocasia
bASV724	ec8113d6fbd9594d8fb041d4d5d831a6	Bacteria	7.33137e-05	-1757.8	-1757.8	1	1	bASV724|Xanthobacteraceae	Alphaproteobacteria	Rhizobiales	Xanthobacteraceae		NA	NA	Lamiaceae	Dalbergia
bASV148	a5e60a724e6619edb2168323c10c7bda	Bacteria	0.0886071	-1788.06	-1791.64	0.00750993	0.0701666	bASV148|Sphingobium	Alphaproteobacteria	Sphingomonadales	Sphingomonadaceae	Sphingobium	Liliopsida	Asparagales	Zingiberaceae	Pandanus
bASV4534	e18a9723c281c858ad12c3cae4ec4309	Bacteria	0.0615243	-1690.01	-1690.66	0.25466	0.579333	bASV4534|Alphaproteobacteria	Alphaproteobacteria				NA	NA	Euphorbiaceae	Alocasia
bASV2408	9abe2e82c66b9850957e2c8101ce690c	Bacteria	0.045932	-1707.23	-1709.93	0.0202244	0.127255	bASV2408|R7C24	Gammaproteobacteria	R7C24	R7C24	R7C24	NA	Arecales	Moraceae	Alocasia
bASV1354	82d6103814c08f082524873a716d1a88	Bacteria	0.0339103	-1736.75	-1737.68	0.174315	0.456698	bASV1354|Intrasporangiaceae	Actinobacteria	Micrococcales	Intrasporangiaceae		Pinopsida	Arecales	Arecaceae	Fagraea
bASV1382	b1a4de11255a99ab7bf90e303d84b484	Bacteria	7.33137e-05	-1749.24	-1749.24	1	1	bASV1382|uncultured_Syntrophobacterales	bacteriap25	bacteriap25	bacteriap25	bacteriap25	Others	Malpighiales	Euphorbiaceae	Bauhinia
bASV172	f0e82b246d195adaed056197f7b65f9c	Bacteria	0.0251345	-1712.49	-1712.84	0.401515	0.789486	bASV172|Pararhizobium_giardinii	Alphaproteobacteria	Rhizobiales	Rhizobiaceae	Allorhizobium-Neorhizobium-Pararhizobium-Rhizobium	Others	Rosales	Araliaceae	Brassaiopsis
bASV1884	70d313e286a0a9677ab2f42b67702030	Bacteria	7.33137e-05	-1692.65	-1692.65	1	1	bASV1884|uncultured_Rubrobacteria	Thermoleophilia	Gaiellales			NA	NA	Urticaceae	Musa
bASV1208	d923a494cfd68c4f476d024d2348b1c9	Bacteria	7.33137e-05	-1716.21	-1716.2	1	1	bASV1208|Paenibacillus	Bacilli	Paenibacillales	Paenibacillaceae	Paenibacillus	NA	NA	NA	NA
bASV1249	3c058a91803d8267c42cecb7c43c4ecb	Bacteria	0.0387347	-1776.69	-1778.44	0.0612747	0.239425	bASV1249|metagenome	Acidobacteriae	Acidobacteriae	Acidobacteriae	Paludibaculum	NA	Rosales	Myrtaceae	Alocasia
bASV1136	32f3276b5658df276c709d4605f491ce	Bacteria	0.0282938	-1705.55	-1706.19	0.259517	0.586693	bASV1136|Microbacterium	Actinobacteria	Micrococcales	Microbacteriaceae	Microbacterium	NA	NA	Asteraceae	NA
bASV626	ba991b4bc241d5c5bd1bac919ea72d04	Bacteria	7.33137e-05	-1738.56	-1738.56	1	1	bASV626|Acidobacteriales	Acidobacteriae	Acidobacteriales			NA	Others	Poaceae	Musa
bASV3750	bd57fa074e2f688d3e6e7223ebbfec3f	Bacteria	7.33137e-05	-1688.78	-1688.78	1	1	bASV3750|uncultured_Acidimicrobiales	Acidimicrobiia	Microtrichales	Iamiaceae	Iamia	NA	Others	Araliaceae	Begonia
bASV1876	5a649261410bd9d8b26285ff2f460eb6	Bacteria	0.0677093	-1735.22	-1738.29	0.01313	0.0969248	bASV1876|uncultured_bacterium	Verrucomicrobiae	Pedosphaerales	Pedosphaeraceae	Ellin517	NA	Arecales	Myrtaceae	Fagraea
bASV1026	4c10176e13582081e274948468087243	Bacteria	7.33137e-05	-1719.94	-1719.94	1	1	bASV1026|Sphingomonas	Alphaproteobacteria	Sphingomonadales	Sphingomonadaceae	Sphingomonas	NA	NA	Meliaceae	Begonia
bASV465	2c15b70110d35f34ee1a46a0e26febb0	Bacteria	7.33137e-05	-1796.77	-1796.77	1	1	bASV465|Edaphobacter	Acidobacteriae	Acidobacteriales	Acidobacteriaceae_(Subgroup_1)	Edaphobacter	Others	Gentianales	Zingiberaceae	Podocarpus
bASV983	05f76a82001fe2cf8d8c57a267ed0e8c	Bacteria	0.0824793	-1763.91	-1769.8	0.000595612	0.0171374	bASV983|Comamonadaceae	Gammaproteobacteria	Burkholderiales	Comamonadaceae		NA	Rosales	Myrtaceae	Alocasia
bASV178	8b442843c311256494f6374a4351a6d4	Bacteria	0.0472193	-1811.66	-1812.01	0.403159	0.791317	bASV178|Sphingomonas	Alphaproteobacteria	Sphingomonadales	Sphingomonadaceae	Sphingomonas	NA	Sapindales	Urticaceae	Alocasia
bASV1867	a46aa0eb6144232ee0e96d17b6a3176e	Bacteria	0.0603281	-1764.29	-1766.31	0.0446131	0.195096	bASV1867|uncultured_Chloroflexi	JG30-KF-CM66	JG30-KF-CM66	JG30-KF-CM66	JG30-KF-CM66	NA	NA	Myrtaceae	Fagraea
bASV2281	5a10dbd0bee7e3bb559033dc639535c0	Bacteria	0.0335619	-1716.8	-1719.07	0.0331981	0.16879	bASV2281|Pedosphaeraceae	Verrucomicrobiae	Pedosphaerales	Pedosphaeraceae	Pedosphaeraceae	NA	NA	NA	NA
bASV493	12afbfda5f382409dd3cf9b2997019d7	Bacteria	0.00539891	-1743.58	-1743.59	0.844961	1	bASV493|uncultured_bacterium	Gammaproteobacteria	Burkholderiales	Sutterellaceae		Others	Others	Poaceae	Musa
bASV993	9fb4753f1b55c1ee081424943a64fa7a	Bacteria	0.101203	-1790.16	-1791.31	0.129243	0.381849	bASV993|Gaiellales	Thermoleophilia	Gaiellales			NA	Lamiales	Urticaceae	Mycetia
bASV3022	6e120ba769a128fe5ed667ad13142722	Bacteria	0.00161527	-1732.46	-1732.46	0.939231	1	bASV3022|Microvirga	Alphaproteobacteria	Rhizobiales	Beijerinckiaceae	Microvirga	NA	Myrtales	Myrtaceae	Pandanus
bASV1530	5795e4fc7335725140570ecf8e5340c5	Bacteria	0.00142759	-1757.02	-1757.02	0.938486	1	bASV1530|TK10	TK10	TK10	TK10	TK10	NA	NA	Lamiaceae	Fagraea
bASV3437	66dac9f1c75df3fa9caaf080cc27c24d	Bacteria	0.0264412	-1664.9	-1665.52	0.26699	0.596043	bASV3437|uncultured_bacterium	MB-A2-108	MB-A2-108	MB-A2-108	MB-A2-108	Polypodiopsida	Lamiales	Urticaceae	Begonia
bASV854	9e928ec7cab0cbd1ed53fc3a79faba14	Bacteria	0.0171506	-1768.34	-1768.37	0.810722	1	bASV854|uncultured_Truepera	Subgroup_5	Subgroup_5	Subgroup_5	Subgroup_5	NA	Arecales	Arecaceae	Dypsis
bASV935	2950ffd044e45dd2d175fd4c58b77540	Bacteria	0.0966481	-1744.97	-1747.4	0.0277824	0.152947	bASV935|Rhizobiaceae	Alphaproteobacteria	Rhizobiales	Rhizobiaceae		Magnoliopsida	NA	Urticaceae	Fagraea
bASV1966	f0a8a955c1dbfbb5506d297bd126aa31	Bacteria	0.00696145	-1756.5	-1756.55	0.734554	1	bASV1966|metagenome	Acidimicrobiia	Microtrichales			NA	Lamiales	Lamiaceae	Fagraea
bASV3738	7a383e9ee61496670f6b125a761c6181	Bacteria	0.109446	-1697.15	-1698.51	0.0991623	0.324473	bASV3738|Rhodococcus_maanshanensis	Actinobacteria	Corynebacteriales	Nocardiaceae	Rhodococcus	NA	NA	Phyllanthaceae	Alocasia
bASV1288	17e46cdc8baf682ad33504de35e1364c	Bacteria	0.0465928	-1718.78	-1719.76	0.161197	0.439605	bASV1288|Sphingomonas_soli	Alphaproteobacteria	Sphingomonadales	Sphingomonadaceae	Sphingomonas	NA	Arecales	Myrtaceae	Brassaiopsis
bASV790	3afea4195ac0397a3d456c4fff822cb5	Bacteria	0.0364537	-1766.15	-1766.82	0.247271	0.569172	bASV790|Gammaproteobacteria	Gammaproteobacteria				NA	NA	NA	NA
bASV832	c3aae26182bc86a9b5b189a57b1f2105	Bacteria	0.135792	-1773.48	-1777.43	0.00494365	0.0549006	bASV832|uncultured_bacterium	Acidimicrobiia	Microtrichales	Ilumatobacteraceae	Ilumatobacteraceae	NA	Myrtales	Myrtaceae	Alocasia
bASV849	717398f90d01ff60e79641b998b3c86e	Bacteria	0.00433031	-1751.79	-1751.82	0.794264	1	bASV849|wastewater_metagenome	Anaerolineae	SBR1031	A4b	A4b	NA	Asparagales	Acanthaceae	Mycetia
bASV520	ea821ff1212486a5ceece8d59f885c63	Bacteria	0.0433477	-1740.91	-1742.26	0.100885	0.328005	bASV520|IMCC26256	Acidimicrobiia	IMCC26256	IMCC26256	IMCC26256	NA	Lamiales	Acanthaceae	Alocasia
bASV249	ce7546b72c48aa99de36d81d8d568d76	Bacteria	0.0592022	-1814.59	-1816.68	0.0410428	0.185954	bASV249|Nocardioides	Actinobacteria	Propionibacteriales	Nocardioidaceae	Nocardioides	NA	Rosales	Myrtaceae	Alocasia
bASV161	31766c4189cc7571b4d3bcc81d2b7a4c	Bacteria	0.0809283	-1638.34	-1640.73	0.028599	0.155392	bASV161|CCD24	Gammaproteobacteria	CCD24	CCD24	CCD24	Magnoliopsida	Arecales	Myrtaceae	Pandanus
bASV1576	b05bfb2c3e9fd0047b7eccc01ecc1273	Bacteria	0.343719	-1669.28	-1678.91	1.13268e-05	0.00130361	bASV1576|Lachnospiraceae	Clostridia	Lachnospirales	Lachnospiraceae		NA	Lamiales	Acanthaceae	Fagraea
bASV3441	1c4cbaa1ad8783624d3a72a3a52b5de8	Bacteria	7.33137e-05	-1658.34	-1658.33	1	1	bASV3441|ADurb.Bin063-1	Verrucomicrobiae	Pedosphaerales	Pedosphaeraceae	ADurb.Bin063-1	Polypodiopsida	Others	Poaceae	NA
bASV2910	18cb619e5360863ad00665e0f1a99175	Bacteria	0.245661	-1676.78	-1684.63	7.40766e-05	0.00521006	bASV2910|metagenome	Gammaproteobacteria	Steroidobacterales	Steroidobacteraceae		Magnoliopsida	Rosales	Urticaceae	Duranta
bASV2390	6dc3aeb1415d08ff808727ca6791d3ef	Bacteria	7.33137e-05	-1666.82	-1666.82	1	1	bASV2390|Pseudonocardia	Actinobacteria	Pseudonocardiales	Pseudonocardiaceae	Pseudonocardia	NA	NA	Poaceae	Begonia
bASV2809	72859b6a40b18b35f7d1d64826f0a10c	Bacteria	7.33137e-05	-1656.4	-1656.39	1	1	bASV2809|Afipia	Alphaproteobacteria	Rhizobiales	Xanthobacteraceae	Afipia	NA	NA	Acanthaceae	Caryota
bASV1671	8b4d1f9b88ec323d317da610adfc1100	Bacteria	0.0202741	-1682.36	-1682.37	0.855704	1	bASV1671|Enterobacterales	Gammaproteobacteria	Enterobacterales			Liliopsida	Asparagales	Poaceae	Mycetia
bASV896	7a2b2947566969e464926ee47f1236cc	Bacteria	0.135942	-1790.78	-1794.42	0.00693762	0.0677408	bASV896|Azospirillales	Alphaproteobacteria	Azospirillales			NA	Myrtales	Myrtaceae	Syzygium
bASV1482	19a094acd78d403f9092cf5ceb19fa67	Bacteria	0.0295612	-1728.06	-1728.72	0.251681	0.575661	bASV1482|Devosia	Alphaproteobacteria	Rhizobiales	Devosiaceae	Devosia	NA	Arecales	NA	Mycetia
bASV1904	e8a658e0c45f325c765d192bcb0f6317	Bacteria	0.236564	-1715.63	-1715.69	0.725819	1	bASV1904|Reyranella	Alphaproteobacteria	Reyranellales	Reyranellaceae	Reyranella	Others	Others	Poaceae	Lagerstroemia
bASV1977	2f5d796aad498d2416103aa3601561d9	Bacteria	7.33137e-05	-1728.72	-1728.71	1	1	bASV1977|uncultured_bacterium	Blastocatellia	45985	45985	45985	NA	NA	NA	Magnolia
bASV164	ba51bec29a58630d7d1069ea4cc8bf3f	Bacteria	0.236452	-1797.94	-1804.58	0.000268429	0.0104563	bASV164|Dongia	Alphaproteobacteria	Dongiales	Dongiaceae	Dongia	Magnoliopsida	Sapindales	Myrtaceae	Brassaiopsis
bASV2170	c3a04c8f87a6fc4714c31f8b6e1febda	Bacteria	0.0575945	-1679.15	-1681.32	0.0373476	0.17557	bASV2170|Chitinophagaceae	Bacteroidia	Chitinophagales	Chitinophagaceae		NA	Arecales	Asparagaceae	Fagraea
bASV244	35a788503aa247ca0bb1a6fdd928dba4	Bacteria	0.0222766	-1787.05	-1788.06	0.156676	0.431199	bASV244|Pseudoxanthomonas	Gammaproteobacteria	Xanthomonadales	Xanthomonadaceae	Pseudoxanthomonas	NA	NA	Araliaceae	Brassaiopsis
bASV721	ea06199ebc69faafb3a06108cfbf9d59	Bacteria	0.194321	-1774.43	-1774.59	0.572265	0.998604	bASV721|uncultured_Holophaga	Acidobacteriae	Subgroup_2	Subgroup_2	Subgroup_2	Others	Others	Poaceae	Horsfieldia
bASV444	a40cb449da62c4389219604bdef8fa72	Bacteria	0.0500993	-1755.39	-1757.88	0.0258932	0.145425	bASV444|Caulobacteraceae	Alphaproteobacteria	Caulobacterales	Caulobacteraceae		Magnoliopsida	Fabales	Lamiaceae	NA
bASV2040	bed8657338b7c5440da44d245ceb571d	Bacteria	0.367518	-1640.39	-1650.95	4.32247e-06	0.000684031	bASV2040|Agromyces	Actinobacteria	Micrococcales	Microbacteriaceae	Agromyces	NA	Lamiales	Urticaceae	Brassaiopsis
bASV2541	288aa0f4a2e107552e3d237f3c055205	Bacteria	7.33137e-05	-1658.84	-1658.83	1	1	bASV2541|uncultured_beta	Gammaproteobacteria	Burkholderiales	Nitrosomonadaceae	mle1-7	NA	Myrtales	Myrtaceae	Syzygium
bASV1345	6c849e558cf53b8885d8fac8f2a81d39	Bacteria	0.0173812	-1732.91	-1733.95	0.149786	0.41922	bASV1345|Allorhizobium-Neorhizobium-Pararhizobium-Rhizobium	Alphaproteobacteria	Rhizobiales	Rhizobiaceae	Allorhizobium-Neorhizobium-Pararhizobium-Rhizobium	NA	NA	Araliaceae	Mycetia
bASV4176	29a5b63a41042c1c06a0bfd12724f30b	Bacteria	7.33137e-05	-1680.08	-1680.07	1	1	bASV4176|Gemmatimonadaceae	Gemmatimonadetes	Gemmatimonadales	Gemmatimonadaceae		NA	NA	NA	Brassaiopsis
bASV1290	30dba37e12560c7a1eb05410b7e84f68	Bacteria	0.0648994	-1736.92	-1739.53	0.0223038	0.133823	bASV1290|Nocardioides	Actinobacteria	Propionibacteriales	Nocardioidaceae	Nocardioides	NA	Arecales	Myrtaceae	Fagraea
bASV3757	cd74b299e42d9843b2416429aacc1589	Bacteria	7.33137e-05	-1653.08	-1653.08	1	1	bASV3757|Enterobacteriaceae	Gammaproteobacteria	Enterobacterales	Enterobacteriaceae		Others	NA	NA	Duranta
bASV5092	fa6f8628383b928aded8755625b35831	Bacteria	7.33137e-05	-1671.1	-1671.09	1	1	bASV5092|TK10	TK10	TK10	TK10	TK10	NA	NA	NA	NA
bASV212	bd36409108926edb970609a120367b99	Bacteria	7.33137e-05	-1775.21	-1775.2	1	1	bASV212|Bacteria					NA	NA	Urticaceae	NA
bASV1511	9f6242f871dad89dd32191fd69fdf23d	Bacteria	0.00969763	-1748.69	-1748.76	0.723075	1	bASV1511|Paenibacillus_curdlanolyticus	Bacilli	Paenibacillales	Paenibacillaceae	Paenibacillus	NA	Arecales	Arecaceae	Brassaiopsis
bASV612	b9fd3d4f31597f4880852dd1b3a01442	Bacteria	0.146939	-1772.51	-1774.58	0.0422669	0.189416	bASV612|Acidothermus	Actinobacteria	Frankiales	Acidothermaceae	Acidothermus	Polypodiopsida	Others	Zingiberaceae	Musa
bASV1039	a17a5ebbb185dbf543c6afad66040ebf	Bacteria	0.0089763	-1735.34	-1735.41	0.694298	1	bASV1039|Phycicoccus	Actinobacteria	Micrococcales	Intrasporangiaceae	Phycicoccus	NA	Lamiales	Acanthaceae	NA
bASV1462	26d8cb2bb649ebc13e2415ad5f178e95	Bacteria	0.0598682	-1733.49	-1735.76	0.0327764	0.167656	bASV1462|Nocardioides	Actinobacteria	Propionibacteriales	Nocardioidaceae	Nocardioides	NA	Lamiales	Myrtaceae	Alocasia
bASV1153	0559731bedee64036c67a07caad9bb6f	Bacteria	0.0220282	-1752.92	-1753.73	0.201998	0.502852	bASV1153|Reyranella	Alphaproteobacteria	Reyranellales	Reyranellaceae	Reyranella	NA	Lamiales	Acanthaceae	Alocasia
bASV2330	6c4ddee7bf2ee1695181e753309125aa	Bacteria	0.010131	-1669.72	-1669.86	0.596109	1	bASV2330|Roseiflexaceae	Chloroflexia	Chloroflexales	Roseiflexaceae		NA	Gentianales	Acanthaceae	Fagraea
bASV355	984c9f88e1ea9e4e6a8551f2c4431bd8	Bacteria	0.139533	-1780.16	-1781.24	0.140594	0.403976	bASV355|Conexibacter	Thermoleophilia	Solirubrobacterales	Solirubrobacteraceae	Conexibacter	NA	Others	Poaceae	Horsfieldia
bASV15	1007d8d222bea47f94c3b2314ea3e381	Bacteria	0.0695342	-1669.53	-1673.01	0.00833384	0.0751852	bASV15|Xanthobacteraceae	Alphaproteobacteria	Rhizobiales	Xanthobacteraceae		NA	Lamiales	Urticaceae	Musa
bASV1376	75c73f7a2c70772f2f0f2c0db389b228	Bacteria	0.0269023	-1702.88	-1703.07	0.542849	0.960513	bASV1376|Acidobacteriales	Acidobacteriae	Acidobacteriales			Others	Malvales	Poaceae	Lagerstroemia
bASV1765	7a4a9711570e808a0b748da33637c45e	Bacteria	0.0364783	-1594.05	-1596.28	0.0346419	0.171337	bASV1765|Lysinimonas	Actinobacteria	Micrococcales	Microbacteriaceae	Lysinimonas	NA	Lamiales	NA	Prunus
bASV2855	9cd922ff137975434fd2a6b4be4b1d3c	Bacteria	7.33137e-05	-1666.54	-1666.54	1	1	bASV2855|metagenome	Alphaproteobacteria	Rhizobiales	Rhizobiaceae	Mesorhizobium	NA	NA	NA	Alocasia
bASV235	011e6fcc11d5e929113b27a2b73d618d	Bacteria	0.0916614	-1661.02	-1664.15	0.0123498	0.0927882	bASV235|Pseudomonas_cichorii	Gammaproteobacteria	Pseudomonadales	Pseudomonadaceae	Pseudomonas	NA	NA	NA	NA
bASV2690	9ec08800ca02f64c0616d140e8a8cff8	Bacteria	7.33137e-05	-1716.16	-1716.16	1	1	bASV2690|uncultured_bacterium	TK10	TK10	TK10	TK10	NA	Malpighiales	Meliaceae	Prunus
bASV343	a161464670e0f2114b40586ffab4962e	Bacteria	0.115463	-1818.24	-1822.4	0.00392651	0.0471182	bASV343|uncultured_Pseudolabrys	Alphaproteobacteria	Rhizobiales	Xanthobacteraceae		NA	Arecales	Urticaceae	Fagraea
bASV1018	aab22d33529c041440a64ad3f089adc2	Bacteria	7.33137e-05	-1755.57	-1755.56	1	1	bASV1018|Roseiflexaceae	Chloroflexia	Chloroflexales	Roseiflexaceae		NA	Myrtales	Asparagaceae	Bauhinia
bASV402	4ae6e9ad7400a23faa11f077d661d497	Bacteria	0.0954808	-1685.29	-1688.78	0.0081786	0.0744224	bASV402|Gaiellales	Thermoleophilia	Gaiellales			NA	Lamiales	Urticaceae	Fagraea
bASV2220	397bbbdb90916a3904aa7afa9a7d3572	Bacteria	7.33137e-05	-1742.1	-1742.09	1	1	bASV2220|uncultured_bacterium	RCP2-54	RCP2-54	RCP2-54	RCP2-54	NA	Myrtales	Myrtaceae	Syzygium
bASV2238	c240e7a710d212a3b18c4db517cee193	Bacteria	0.13936	-1687.15	-1690.03	0.0163875	0.11306	bASV2238|uncultured_bacterium	Alphaproteobacteria	Parvibaculales	Parvibaculaceae		NA	Asparagales	Lauraceae	Magnolia
bASV1750	90aac44579cebec528aa881ac7f55072	Bacteria	7.33137e-05	-1652.92	-1652.91	1	1	bASV1750|Rhizobium_soli	Alphaproteobacteria	Rhizobiales	Rhizobiaceae	Allorhizobium-Neorhizobium-Pararhizobium-Rhizobium	NA	Asparagales	Asparagaceae	Brassaiopsis
bASV5137	4dfb7fee95a2cbf0f51447cfd9748464	Bacteria	0.0114192	-1680.29	-1680.3	0.896978	1	bASV5137|uncultured_bacterium	TK10	TK10	TK10	TK10	NA	Rosales	Myrtaceae	NA
bASV3539	666821c7f881ebbf57de7c6a9a453e05	Bacteria	0.147022	-1683.81	-1686.07	0.0336691	0.17016	bASV3539|uncultured_Gemmatimonadales	Gemmatimonadetes	Gemmatimonadales	Gemmatimonadaceae		NA	NA	Urticaceae	Begonia
bASV1395	3c191d82b2a94793c6714cc88647904f	Bacteria	0.000660804	-1741.33	-1741.33	0.970398	1	bASV1395|Microbacterium	Actinobacteria	Micrococcales	Microbacteriaceae	Microbacterium	NA	Lamiales	Araceae	Rhaphidophora
bASV1343	ea2dd2c3698d6814e5a3335c50ae3cb0	Bacteria	7.33137e-05	-1667.03	-1667.03	1	1	bASV1343|Cupriavidus	Gammaproteobacteria	Burkholderiales	Burkholderiaceae	Cupriavidus	NA	NA	NA	Musa
bASV2500	3d5dc5d9785acc59633d474cc4a2b414	Bacteria	0.297151	-1674.37	-1679.44	0.0014425	0.0278013	bASV2500|uncultured_bacterium	Actinobacteria	Pseudonocardiales	Pseudonocardiaceae	Pseudonocardia	Polypodiopsida	Lamiales	Urticaceae	Musa
bASV2601	5edb98da0d817407e28106d71fc52334	Bacteria	7.33137e-05	-1671.77	-1671.76	1	1	bASV2601|SWB02	Alphaproteobacteria	Caulobacterales	Hyphomonadaceae	SWB02	NA	NA	Myrtaceae	Syzygium
bASV1540	58d75660fef91d9330f18db29dddfb1e	Bacteria	7.33137e-05	-1761.92	-1761.92	1	1	bASV1540|uncultured_soil	Thermoleophilia	Solirubrobacterales	67-14	67-14	NA	Gentianales	Myrtaceae	Fagraea
bASV4205	f0800ad54f3084db486f98d7611dc3d3	Bacteria	7.33137e-05	-1638.54	-1638.54	1	1	bASV4205|uncultured_soil	Latescibacterota	Latescibacterota	Latescibacterota	Latescibacterota	NA	NA	Meliaceae	Begonia
bASV3753	ab0e31b6482cfd30b78451f3bbc01c37	Bacteria	0.0124925	-1618.91	-1619.02	0.638941	1	bASV3753|uncultured_Alphaproteobacteria	Alphaproteobacteria	Rhizobiales	Rhizobiaceae	Allorhizobium-Neorhizobium-Pararhizobium-Rhizobium	NA	NA	NA	Alocasia
bASV1128	a7703bc3c861a02ca3ff036a3e376dde	Bacteria	0.0381966	-1764.79	-1766.81	0.0445583	0.195096	bASV1128|Ramlibacter	Gammaproteobacteria	Burkholderiales	Comamonadaceae	Ramlibacter	NA	Myrtales	Myrtaceae	Codiaeum
bASV874	e41cff7b33a7331ae378070657d2dac0	Bacteria	0.0176355	-1772.82	-1772.93	0.642866	1	bASV874|Blastococcus	Actinobacteria	Frankiales	Geodermatophilaceae	Blastococcus	NA	Myrtales	Myrtaceae	Alocasia
bASV660	2766610d7c1c19ebf86d9047636e3da4	Bacteria	0.0415007	-1776.61	-1777.45	0.195516	0.492501	bASV660|Pedosphaeraceae	Verrucomicrobiae	Pedosphaerales	Pedosphaeraceae	Pedosphaeraceae	NA	Malvales	Malvaceae	Fagraea
bASV1944	12b51aeb7aa9e5d8d754c7801e8ea696	Bacteria	0.0536686	-1689.69	-1692.3	0.0224374	0.134306	bASV1944|Brevundimonas	Alphaproteobacteria	Caulobacterales	Caulobacteraceae	Brevundimonas	NA	NA	NA	Pandanus
bASV2576	eac687c1a10912c51db3d3604b19e05f	Bacteria	0.0488792	-1735.42	-1736.98	0.0779273	0.277715	bASV2576|uncultured_bacterium					NA	Myrtales	Myrtaceae	Alocasia
bASV1518	97c1dfac1e6c2f72abcafcc4c3502d87	Bacteria	0.0435341	-1755.9	-1757.73	0.0562508	0.227519	bASV1518|uncultured_bacterium	MBNT15	MBNT15	MBNT15	MBNT15	NA	Arecales	Arecaceae	Mycetia
bASV1999	0604070659c533e603850c615f336436	Bacteria	0.288731	-1688.96	-1691.99	0.0138544	0.100803	bASV1999|Gaiellales	Thermoleophilia	Gaiellales			NA	NA	Urticaceae	Begonia
bASV5499	aa734f81ca4a8080f871050cb8bcd276	Bacteria	7.33137e-05	-1654.82	-1654.82	1	1	bASV5499|uncultured_actinobacterium	Acidimicrobiia	IMCC26256	IMCC26256	IMCC26256	NA	Asparagales	Asparagaceae	NA
bASV2817	e85fa74757ef81b27704fe8bed0e4afc	Bacteria	0.105166	-1695.63	-1695.63	0.892794	1	bASV2817|Rhizobiaceae	Alphaproteobacteria	Rhizobiales	Rhizobiaceae		NA	Rosales	Acanthaceae	Alocasia
bASV4171	dc6d2d339fbacd99afc2852090688154	Bacteria	0.0881567	-1650.42	-1654.06	0.00701741	0.0677408	bASV4171|Candidatus_Solibacter	Acidobacteriae	Solibacterales	Solibacteraceae	Candidatus_Solibacter	NA	Myrtales	Myrtaceae	Prunus
bASV3710	b1ab0d297ca1d59bef36f0141e0a01c6	Bacteria	0.192435	-1684.1	-1686.28	0.0366096	0.175117	bASV3710|uncultured_bacterium	Ktedonobacteria	Ktedonobacterales	JG30-KF-AS9	JG30-KF-AS9	Others	Others	Poaceae	Musa
bASV516	0249a956cd1ac1dd4caca7fc14b2ef64	Bacteria	7.33137e-05	-1773.65	-1773.64	1	1	bASV516|Gemmatimonadaceae	Gemmatimonadetes	Gemmatimonadales	Gemmatimonadaceae		NA	NA	NA	Fagraea
bASV797	123ca20987c9af5d05903515a17dcd16	Bacteria	0.0344142	-1803.32	-1804.04	0.228445	0.539574	bASV797|Xanthobacteraceae	Alphaproteobacteria	Rhizobiales	Xanthobacteraceae		Magnoliopsida	Sapindales	Myrtaceae	NA
bASV345	c37abf360cdd54f0d8f80686b644c4c6	Bacteria	7.33137e-05	-1797.68	-1797.68	1	1	bASV345|Sphingomonas	Alphaproteobacteria	Sphingomonadales	Sphingomonadaceae	Sphingomonas	Pinopsida	Arecales	Poaceae	Fagraea
bASV1875	ccfd9a75621859eb534fd63e26b9a082	Bacteria	0.0223259	-1732.03	-1732.98	0.168292	0.449827	bASV1875|TK10	TK10	TK10	TK10	TK10	NA	NA	NA	NA
bASV3139	156b8abd53b1b22e7c3ff69fec5cdb4b	Bacteria	0.0246554	-1649.19	-1649.77	0.278497	0.612114	bASV3139|uncultured_bacterium	Gammaproteobacteria	Xanthomonadales	Rhodanobacteraceae	Chiayiivirga	NA	Myrtales	Myrtaceae	Alocasia
bASV817	365ce07be8e2e2186473c763e4ea1a01	Bacteria	7.33137e-05	-1763.19	-1763.18	1	1	bASV817|uncultured_bacterium	Thermoleophilia	Solirubrobacterales	67-14	67-14	NA	NA	Urticaceae	NA
bASV349	31d497f4423f692578e2fdbf9d375bf1	Bacteria	7.33137e-05	-1758.34	-1758.33	1	1	bASV349|uncultured_Thermomicrobia	AD3	AD3	AD3	AD3	Pinopsida	NA	Poaceae	Lagerstroemia
bASV789	8fe1663b62c141a1469f5b0aff6fa2d3	Bacteria	7.33137e-05	-1738.28	-1738.27	1	1	bASV789|Kitasatospora	Actinobacteria	Streptomycetales	Streptomycetaceae	Kitasatospora	Polypodiopsida	Malvales	Poaceae	Musa
bASV2914	a92b2e41e66a56d41887f3c128b6110a	Bacteria	0.0148191	-1706.26	-1706.35	0.670404	1	bASV2914|Novosphingobium	Alphaproteobacteria	Sphingomonadales	Sphingomonadaceae	Novosphingobium	Polypodiopsida	Asparagales	Asparagaceae	Mycetia
bASV739	d9d60413f2fbceef44590bb3a80ab8b0	Bacteria	7.33137e-05	-1785.45	-1785.45	1	1	bASV739|uncultured_bacterium	Dehalococcoidia	S085	S085	S085	NA	NA	Myrtaceae	Alocasia
bASV1085	f454c8d09b67ead2c6f6683b8b6e9df2	Bacteria	7.33137e-05	-1735.23	-1735.23	1	1	bASV1085|Caulobacter	Alphaproteobacteria	Caulobacterales	Caulobacteraceae	Caulobacter	NA	NA	NA	NA
bASV3790	8b1a84a97f3b33e1c7ffb49f03221833	Bacteria	0.084094	-1713.74	-1717.98	0.00360502	0.0459017	bASV3790|Myxococcales_bacterium	Polyangia	mle1-27	mle1-27	mle1-27	NA	Arecales	Myrtaceae	Fagraea
bASV1198	c511ef881d967e15123c96542681081b	Bacteria	0.0977954	-1771.78	-1773.58	0.0582364	0.232162	bASV1198|mle1-7	Gammaproteobacteria	Burkholderiales	Nitrosomonadaceae	mle1-7	NA	Arecales	Urticaceae	Mycetia
bASV4050	6cc523d7c08387b00f2d1c43f49b373b	Bacteria	7.33137e-05	-1672.11	-1672.11	1	1	bASV4050|Rhizobiales_Incertae_Sedis	Alphaproteobacteria	Rhizobiales	Rhizobiales_Incertae_Sedis		NA	NA	NA	NA
bASV2023	30910f8d0d5d2cad62ffa927e0dbf846	Bacteria	0.149219	-1704.94	-1706.23	0.106947	0.340615	bASV2023|uncultured_gamma	Gammaproteobacteria	Gammaproteobacteria_Incertae_Sedis	Unknown_Family	Acidibacter	Polypodiopsida	Arecales	Urticaceae	Begonia
bASV3177	8feb62974c287392f02b444953466524	Bacteria	7.33137e-05	-1656.56	-1656.56	1	1	bASV3177|uncultured_bacterium	MBNT15	MBNT15	MBNT15	MBNT15	NA	NA	Urticaceae	Begonia
bASV979	7c6833550e5a267dabad702ef1b1f579	Bacteria	0.0427584	-1769.93	-1771.05	0.134283	0.392616	bASV979|Microtrichales	Acidimicrobiia	Microtrichales			NA	Lamiales	Acanthaceae	NA
bASV624	e2fe77732be412ca70429e4fd7753d37	Bacteria	0.029908	-1790.05	-1790.2	0.591542	1	bASV624|Xanthobacteraceae	Alphaproteobacteria	Rhizobiales	Xanthobacteraceae		NA	NA	Lamiaceae	Lagerstroemia
bASV1922	0a679dad7f637b51fa5b1a662a27e4eb	Bacteria	0.272229	-1734.35	-1742.59	4.92816e-05	0.00402519	bASV1922|Ellin6067	Gammaproteobacteria	Burkholderiales	Nitrosomonadaceae	Ellin6067	NA	Lamiales	Urticaceae	Mycetia
bASV152	ab5963cdc2547234808c6615de5ae182	Bacteria	7.33137e-05	-1748.33	-1748.33	1	1	bASV152|Klebsiella	Gammaproteobacteria	Enterobacterales	Enterobacteriaceae	Klebsiella	NA	NA	Acanthaceae	Rhaphidophora
bASV292	5dd72c5af829832fe31264b744431620	Bacteria	7.33137e-05	-1775.44	-1775.43	1	1	bASV292|Sphingomonas	Alphaproteobacteria	Sphingomonadales	Sphingomonadaceae	Sphingomonas	NA	NA	Araliaceae	Mycetia
bASV2063	347fab4b02c977d367023fa3dde0c05f	Bacteria	0.142841	-1754.04	-1755.91	0.053217	0.218375	bASV2063|SM1A02	Phycisphaerae	Phycisphaerales	Phycisphaeraceae	SM1A02	NA	NA	Myrtaceae	Brassaiopsis
bASV1784	7a147063ff31d18d14c2ef620db26bf8	Bacteria	7.33137e-05	-1687.38	-1687.38	1	1	bASV1784|uncultured_organism	AD3	AD3	AD3	AD3	Others	Others	Zingiberaceae	Lagerstroemia
bASV483	f82a6fda531c1883c237594b8695c459	Bacteria	7.33137e-05	-1741.12	-1741.12	1	1	bASV483|Acidobacteriales	Acidobacteriae	Acidobacteriales			NA	NA	NA	Pterospermum
bASV3619	91a084cd704cce47469d43a658b1b9e7	Bacteria	7.33137e-05	-1624.91	-1624.91	1	1	bASV3619|Arenimonas	Gammaproteobacteria	Xanthomonadales	Xanthomonadaceae	Arenimonas	NA	NA	NA	Fagraea
bASV540	23551ee8774f719bd8a0d31870632961	Bacteria	7.33137e-05	-1732.13	-1732.13	1	1	bASV540|uncultured_bacterium	Verrucomicrobiae	Pedosphaerales	Pedosphaeraceae	ADurb.Bin063-1	NA	NA	Asparagaceae	Fagraea
bASV1829	f456386668552eb6f0051a7e7ba175c2	Bacteria	7.33137e-05	-1733.4	-1733.4	1	1	bASV1829|Gaiellales	Thermoleophilia	Gaiellales			Polypodiopsida	Others	Urticaceae	Musa
bASV195	b45b1460719052df7989a0b1ac6a91d9	Bacteria	0.138616	-1821.8	-1822.96	0.128885	0.381236	bASV195|Xanthobacteraceae	Alphaproteobacteria	Rhizobiales	Xanthobacteraceae		Polypodiopsida	Others	Zingiberaceae	Horsfieldia
bASV3813	9009328221a6b736fbb2d14fbebf61a0	Bacteria	0.0181808	-1651.54	-1651.85	0.430188	0.829579	bASV3813|Microscillaceae	Bacteroidia	Cytophagales	Microscillaceae		NA	Myrtales	Myrtaceae	Dracaena
bASV1522	0f3818c4ab56fdf42b17692173cd1c82	Bacteria	7.33137e-05	-1738.36	-1738.36	1	1	bASV1522|67-14	Thermoleophilia	Solirubrobacterales	67-14	67-14	NA	Arecales	Lamiaceae	Pandanus
bASV2614	3d100d0ed2d41411544c5d7b7697411e	Bacteria	7.33137e-05	-1670.56	-1670.56	1	1	bASV2614|uncultured_bacterium	Thermoleophilia	Gaiellales			Others	Others	Poaceae	Musa
bASV2603	bbabb635e647e88c4da39570d840b994	Bacteria	7.33137e-05	-1692.84	-1692.83	1	1	bASV2603|Xanthobacteraceae	Alphaproteobacteria	Rhizobiales	Xanthobacteraceae		NA	Arecales	Arecaceae	Dypsis
bASV823	b6be8bf4c30b0a12820a979ff7c59bc4	Bacteria	7.33137e-05	-1749.6	-1749.6	1	1	bASV823|Brevundimonas	Alphaproteobacteria	Caulobacterales	Caulobacteraceae	Brevundimonas	NA	NA	Urticaceae	NA
bASV439	45e90295d7d70fb45cdac4dc5ae3d464	Bacteria	0.0157672	-1815.83	-1816.02	0.540582	0.95731	bASV439|PLTA13	Gammaproteobacteria	PLTA13	PLTA13	PLTA13	NA	Myrtales	Myrtaceae	Alocasia
bASV2260	9cc700c35252ee18601396f779dc7824	Bacteria	7.33137e-05	-1749.83	-1749.83	1	1	bASV2260|Desulfobacterota					NA	NA	NA	Mycetia
bASV1558	56ae9246f078b3feeed9fa50208a8b8d	Bacteria	5.7958e-05	-1740.12	-1740.12	1	1	bASV1558|Chthoniobacter	Verrucomicrobiae	Chthoniobacterales	Chthoniobacteraceae	Chthoniobacter	NA	NA	Lamiaceae	Alocasia
bASV1165	feba7bbcafe27307f0e19ad47c4fb196	Bacteria	0.209334	-1762.85	-1764.17	0.103855	0.333734	bASV1165|Xanthobacteraceae	Alphaproteobacteria	Rhizobiales	Xanthobacteraceae		NA	NA	Urticaceae	Begonia
bASV2804	f3c07dc016abd474ba8ed782b3f50fbd	Bacteria	0.089938	-1681.71	-1681.34	1	1	bASV2804|Gaiellales	Thermoleophilia	Gaiellales			NA	NA	Urticaceae	Mycetia
bASV1406	cd5d27cfa8913d15f6860ab57df2ecca	Bacteria	0.0878785	-1755.78	-1757.58	0.0578889	0.231922	bASV1406|Micropepsaceae	Alphaproteobacteria	Micropepsales	Micropepsaceae		Polypodiopsida	NA	Urticaceae	Mycetia
bASV3477	0a7e18ba56a062ed67387ba4c003c259	Bacteria	0.00734958	-1650.68	-1650.79	0.64676	1	bASV3477|Chitinophagaceae	Bacteroidia	Chitinophagales	Chitinophagaceae		NA	NA	NA	Lagerstroemia
bASV380	b56859b841d4cf6e2eb15814904619ae	Bacteria	0.194121	-1795.55	-1803.64	5.74311e-05	0.00429459	bASV380|Paenibacillus	Bacilli	Paenibacillales	Paenibacillaceae	Paenibacillus	NA	Rosales	Acanthaceae	Alocasia
bASV175	5716d69ccbec4aea24aa30be1ce7c8c1	Bacteria	0.016159	-1724.9	-1724.95	0.761572	1	bASV175|Pseudomonas	Gammaproteobacteria	Pseudomonadales	Pseudomonadaceae	Pseudomonas	NA	Sapindales	NA	NA
bASV1794	06ef1b572e32ac625927aaaaab66b9a2	Bacteria	7.33137e-05	-1682.67	-1682.67	1	1	bASV1794|Gaiellales	Thermoleophilia	Gaiellales			Polypodiopsida	Malvales	Poaceae	Horsfieldia
bASV4608	240f26bb0a048bbadd128657a232996d	Bacteria	0.0301816	-1642.09	-1642.72	0.260547	0.587418	bASV4608|Micromonosporaceae	Actinobacteria	Micromonosporales	Micromonosporaceae		NA	Arecales	Myrtaceae	Pandanus
bASV4054	b55da1988e1f630f377c358f3c758515	Bacteria	0.0400761	-1624.94	-1625.44	0.316571	0.673012	bASV4054|Mumia	Actinobacteria	Propionibacteriales	Nocardioidaceae	Mumia	NA	Arecales	Asteraceae	Fagraea
bASV1568	d2d7887f31aad122b4b816ad99affbae	Bacteria	0.0453923	-1675.54	-1676.6	0.14583	0.413567	bASV1568|uncultured_bacterium	Clostridia	Peptostreptococcales-Tissierellales	Peptostreptococcaceae	Sporacetigenium	NA	NA	Myrtaceae	Fagraea
bASV2608	f0af0ee748f092954113d72c7ea359c0	Bacteria	0.0262923	-1653.75	-1654.59	0.19306	0.488828	bASV2608|MND1	Gammaproteobacteria	Burkholderiales	Nitrosomonadaceae	MND1	NA	Arecales	Myrtaceae	Bauhinia
bASV639	9519e0c0823607d1c9cbd45052cc5dc0	Bacteria	7.33137e-05	-1770.9	-1770.9	1	1	bASV639|Bosea	Alphaproteobacteria	Rhizobiales	Beijerinckiaceae	Bosea	NA	Fabales	Araceae	NA
bASV3583	50b23c562f0755621036d7ede6a869e4	Bacteria	7.33137e-05	-1659.08	-1659.08	1	1	bASV3583|Frankiales	Actinobacteria	Frankiales			NA	Lamiales	NA	Fagraea
bASV547	1a2628e03feafca54db6dd0c14f8f992	Bacteria	0.0938545	-1789.25	-1791.89	0.021588	0.131403	bASV547|Streptomyces	Actinobacteria	Streptomycetales	Streptomycetaceae	Streptomyces	NA	Myrtales	Myrtaceae	Alocasia
bASV1636	1d2fdf01cdd67562125a7dd0340e86c7	Bacteria	7.33137e-05	-1690.87	-1690.86	1	1	bASV1636|uncultured_bacterium	Chloroflexia	Chloroflexales	Roseiflexaceae		Others	NA	Poaceae	Fagraea
bASV1040	da09b7c441e45288e74b3feee6a0e302	Bacteria	0.0724729	-1767.74	-1768.78	0.14984	0.41922	bASV1040|Candidatus_Solibacter	Acidobacteriae	Solibacterales	Solibacteraceae	Candidatus_Solibacter	NA	Myrtales	Myrtaceae	Fagraea
bASV1292	66577c73be09d10e9f4e08a29baf523a	Bacteria	0.0740661	-1732.13	-1734.12	0.0462616	0.19887	bASV1292|Curtobacterium	Actinobacteria	Micrococcales	Microbacteriaceae	Curtobacterium	NA	Asparagales	Asteraceae	Pandanus
bASV458	a9ef5ce48aaa8131fd9adf3a97f0191b	Bacteria	0.0339511	-1720.44	-1720.51	0.697762	1	bASV458|Subgroup_2	Acidobacteriae	Subgroup_2	Subgroup_2	Subgroup_2	Polypodiopsida	Others	NA	Musa
bASV2051	8e1f26dfbf158cb0d794da98a9ada038	Bacteria	0.0868223	-1740.5	-1741.19	0.242361	0.562989	bASV2051|Nonomuraea	Actinobacteria	Streptosporangiales	Streptosporangiaceae	Nonomuraea	NA	NA	Urticaceae	Polyalthia
bASV342	02ac27e9134b4e678289e251b7e26aea	Bacteria	0.0433528	-1773.47	-1774.15	0.244813	0.566088	bASV342|SC-I-84	Gammaproteobacteria	Burkholderiales	SC-I-84	SC-I-84	NA	Arecales	Euphorbiaceae	Alocasia
bASV6550	47e37a85b6d3bae666cf4b4200db0225	Bacteria	7.33137e-05	-1634.17	-1634.16	1	1	bASV6550|metagenome	Gemmatimonadetes	Gemmatimonadales	Gemmatimonadaceae		NA	NA	NA	Begonia
bASV749	83f1da449dcd178c95b408a2060ccfbb	Bacteria	0.0770832	-1760.81	-1763.56	0.0190717	0.122563	bASV749|Pseudorhodoplanes	Alphaproteobacteria	Rhizobiales	Xanthobacteraceae	Pseudorhodoplanes	NA	Rosales	Acanthaceae	Fagraea
bASV455	45df7e4a3a41dc9d29cb84241e3a3cbd	Bacteria	0.258873	-1752.44	-1766.38	1.29391e-07	5.46029e-05	bASV455|Novosphingobium	Alphaproteobacteria	Sphingomonadales	Sphingomonadaceae	Novosphingobium	NA	Myrtales	Myrtaceae	Fagraea
bASV2153	af7af95a8e49d14090abc735d2f0fbee	Bacteria	0.0521394	-1725.49	-1727.24	0.0615916	0.239554	bASV2153|Rhizobiaceae	Alphaproteobacteria	Rhizobiales	Rhizobiaceae		NA	Rosales	Myrtaceae	Alocasia
bASV54	bdc1e2ff0e43d960b41126c9f3225dc4	Bacteria	0.0620882	-1821.92	-1823.25	0.102565	0.331244	bASV54|Pseudomonas	Gammaproteobacteria	Pseudomonadales	Pseudomonadaceae	Pseudomonas	NA	Sapindales	Urticaceae	Alocasia
bASV5111	6f5950fa530e0d7a842aa5b7a5ebb32f	Bacteria	0.0120263	-1636.21	-1636.5	0.448258	0.855305	bASV5111|uncultured_proteobacterium					NA	NA	Lamiaceae	Mycetia
bASV104	49a25b53ea19118a09dd5053cb16ae84	Bacteria	0.0185689	-1784.61	-1785.65	0.149552	0.41922	bASV104|Pantoea_rwandensis	Gammaproteobacteria	Enterobacterales	Erwiniaceae	Pantoea	NA	NA	Asparagaceae	NA
bASV1538	a9ba384aff137bedba715a69c85adb46	Bacteria	0.01105	-1750.17	-1750.28	0.649945	1	bASV1538|SC-I-84	Gammaproteobacteria	Burkholderiales	SC-I-84	SC-I-84	NA	Arecales	Arecaceae	Podocarpus
bASV4790	b4d32e0ca3716ba7339271609141cd01	Bacteria	7.33137e-05	-1600.28	-1600.27	1	1	bASV4790|Gemmatimonas	Gemmatimonadetes	Gemmatimonadales	Gemmatimonadaceae	Gemmatimonas	NA	NA	NA	Fagraea
bASV2783	cfa3ee1acd9af81bb49f1aca646b1357	Bacteria	0.022426	-1706.85	-1707.11	0.469057	0.876553	bASV2783|MBNT15	MBNT15	MBNT15	MBNT15	MBNT15	NA	NA	Myrtaceae	Alocasia
bASV1605	1b4cb9775c179ac9f8bd88df23fb0211	Bacteria	0.0384865	-1752.67	-1753.88	0.119857	0.366078	bASV1605|uncultured_delta	Holophagae	Subgroup_7	Subgroup_7	Subgroup_7	NA	NA	Poaceae	Lagerstroemia
bASV1145	32c9a5b928f3b6bca030f91bd524d630	Bacteria	0.0725485	-1667.46	-1668.49	0.151046	0.421664	bASV1145|uncultured_bacterium	Saccharimonadia	Saccharimonadales	Saccharimonadales	Saccharimonadales	NA	Asparagales	Poaceae	Lagerstroemia
bASV778	310139d61be0dbfa456522961580ea8e	Bacteria	0.0246059	-1790.57	-1790.92	0.406818	0.796647	bASV778|Gaiella	Thermoleophilia	Gaiellales	Gaiellaceae	Gaiella	NA	Arecales	Myrtaceae	Pandanus
bASV2057	7faeeacdada3a9d007751feab20dc81b	Bacteria	7.33137e-05	-1677.85	-1677.85	1	1	bASV2057|uncultured_bacterium	Alphaproteobacteria	Acetobacterales	Acetobacteraceae		Polypodiopsida	NA	NA	NA
bASV1515	1bda88ab81e460602b4d5f37fbf9f150	Bacteria	0.0856484	-1725.6	-1726.37	0.213582	0.517997	bASV1515|bacterium_Ellin6517	Thermoleophilia	Gaiellales			NA	Sapindales	Urticaceae	Musa
bASV5145	d780a9cbb049f3e75239cb62ad8567c6	Bacteria	0.0788723	-1633.9	-1635.94	0.0437609	0.192574	bASV5145|Roseomonas	Alphaproteobacteria	Acetobacterales	Acetobacteraceae	Roseomonas	NA	Arecales	Myrtaceae	Fagraea
bASV1318	a72e02b65c08f2a486756a7969009a19	Bacteria	0.078336	-1766.73	-1767.62	0.180659	0.465678	bASV1318|Agromyces	Actinobacteria	Micrococcales	Microbacteriaceae	Agromyces	NA	Myrtales	Myrtaceae	Bauhinia
bASV1905	042ed1ce63837ddf5ccbf9d3814439d0	Bacteria	0.0810719	-1742.77	-1746.79	0.00455102	0.0521411	bASV1905|uncultured_bacterium	Subgroup_11	Subgroup_11	Subgroup_11	Subgroup_11	NA	Arecales	Myrtaceae	Dypsis
bASV781	db1272ae8f38427dd7385db793af668b	Bacteria	7.33137e-05	-1770.02	-1770.02	1	1	bASV781|Arthrobacter	Actinobacteria	Micrococcales	Micrococcaceae	Arthrobacter	Polypodiopsida	NA	NA	Alocasia
bASV4029	451cae6d9799f37d3cd556129f78c5dd	Bacteria	7.33137e-05	-1661.93	-1661.92	1	1	bASV4029|uncultured_actinobacterium	Acidimicrobiia	IMCC26256	IMCC26256	IMCC26256	NA	NA	Urticaceae	Musa
bASV652	1429794548118d6be9e9ea1fcf5a03af	Bacteria	0.060018	-1746.64	-1750.1	0.00849249	0.0751852	bASV652|Nocardia	Actinobacteria	Corynebacteriales	Nocardiaceae	Nocardia	NA	Rosales	Acanthaceae	Alocasia
bASV2186	2f6ba6f3882ed28310d2977aaf95de54	Bacteria	7.33137e-05	-1666.46	-1666.46	1	1	bASV2186|uncultured_gamma	Gammaproteobacteria	Gammaproteobacteria_Incertae_Sedis	Unknown_Family	Acidibacter	NA	Malvales	Poaceae	NA
bASV392	586e156c49edbdaf356124e4282dee2a	Bacteria	0.0937309	-1750.18	-1752.58	0.028244	0.154206	bASV392|uncultured_bacterium	Gammaproteobacteria	Burkholderiales	Sutterellaceae		NA	Arecales	Myrtaceae	Pandanus
bASV654	b3b44863be9e87904fcccc189e407b0a	Bacteria	0.0153733	-1793.58	-1793.9	0.425637	0.82393	bASV654|Bacillus	Bacilli	Bacillales	Bacillaceae	Bacillus	Magnoliopsida	Arecales	Urticaceae	Brassaiopsis
bASV1940	ac5035412bc1c7b742622ed04916dd82	Bacteria	0.0578212	-1735.66	-1737.88	0.034942	0.171793	bASV1940|PeM15	Actinobacteria	PeM15	PeM15	PeM15	NA	Lamiales	Myrtaceae	Alocasia
bASV1854	3410126ca849944db21b45f416fa268b	Bacteria	7.33137e-05	-1680.04	-1680.04	1	1	bASV1854|Gaiellales	Thermoleophilia	Gaiellales			Pinopsida	NA	NA	Lagerstroemia
bASV442	aa132a481024b2b8492236beeaa24afe	Bacteria	0.0131819	-1802.86	-1803.03	0.56534	0.991303	bASV442|Rhodoplanes	Alphaproteobacteria	Rhizobiales	Xanthobacteraceae	Rhodoplanes	NA	Rosales	Araliaceae	Alocasia
bASV1143	c3702e3511c3e14c20bf9ce11d042f03	Bacteria	7.33137e-05	-1722.22	-1722.22	1	1	bASV1143|uncultured_bacterium	Thermoleophilia	Solirubrobacterales	Solirubrobacteraceae	Conexibacter	NA	Malpighiales	Myrtaceae	Fagraea
bASV502	396fe38e79431c9babba25eb49b9c72e	Bacteria	0.0402024	-1676.16	-1677.71	0.0784868	0.278722	bASV502|uncultured_Myxococcales	Polyangia	Haliangiales	Haliangiaceae	Haliangium	NA	Arecales	Lamiaceae	Dypsis
bASV2349	da6c84f88484500c3dc439dd29f62372	Bacteria	0.0904835	-1726.97	-1728.22	0.112999	0.352791	bASV2349|uncultured_bacterium	Actinobacteria	Micromonosporales	Micromonosporaceae	Luedemannella	Others	Arecales	Myrtaceae	Prunus
bASV7747	47121fb7abaf029277765008fcd44741	Bacteria	0.0112068	-1644.74	-1644.86	0.626973	1	bASV7747|uncultured_bacterium	Subgroup_22	Subgroup_22	Subgroup_22	Subgroup_22	NA	Arecales	Urticaceae	Dypsis
bASV1454	0e3ebbe382131407c792a0abeaf5735d	Bacteria	0.0637915	-1670.68	-1672.97	0.0323308	0.166312	bASV1454|Novosphingobium	Alphaproteobacteria	Sphingomonadales	Sphingomonadaceae	Novosphingobium	NA	NA	Euphorbiaceae	Dalbergia
bASV2497	456ed3f327f3333197ea2aa928335282	Bacteria	7.33137e-05	-1736.87	-1736.87	1	1	bASV2497|Ilumatobacteraceae	Acidimicrobiia	Microtrichales	Ilumatobacteraceae		NA	Arecales	NA	Alocasia
bASV3598	da20f997a60a7bf9762bb961644bdfd7	Bacteria	0.257934	-1663.1	-1664.66	0.0769193	0.275205	bASV3598|mle1-7	Gammaproteobacteria	Burkholderiales	Nitrosomonadaceae	mle1-7	NA	NA	Acanthaceae	Alocasia
bASV1127	1c3986e928da950e5990013d7ed309a4	Bacteria	0.0308339	-1756.08	-1756.68	0.270107	0.599922	bASV1127|Tardiphaga	Alphaproteobacteria	Rhizobiales	Xanthobacteraceae	Tardiphaga	Liliopsida	Asparagales	Araliaceae	Caryota
bASV1858	4f99ac7029c048501c8f71edaf42a9ea	Bacteria	0.0493593	-1742.55	-1743.47	0.176081	0.459153	bASV1858|metagenome	Alphaproteobacteria	Acetobacterales	Acetobacteraceae		Polypodiopsida	Others	Urticaceae	Mycetia
bASV1246	e1db5750b9c19685915b85eb023b83f3	Bacteria	0.0556001	-1713.32	-1715.32	0.045752	0.19784	bASV1246|Allorhizobium-Neorhizobium-Pararhizobium-Rhizobium	Alphaproteobacteria	Rhizobiales	Rhizobiaceae	Allorhizobium-Neorhizobium-Pararhizobium-Rhizobium	NA	Arecales	Phyllanthaceae	Pandanus
bASV7134	1b63cfa872e7bbfb07b9c4ec39e59111	Bacteria	0.0301383	-1622.61	-1623.04	0.350207	0.721061	bASV7134|uncultured_bacterium	OM190	OM190	OM190	OM190	NA	NA	NA	NA
bASV807	dada5f01c465e586395678a3d404582e	Bacteria	7.33137e-05	-1745.92	-1745.91	1	1	bASV807|uncultured_bacterium	Alphaproteobacteria	Rhizobiales	Methyloligellaceae	Methyloligellaceae	NA	Arecales	Araliaceae	Brassaiopsis
bASV1179	c9742ffa409ee4808fc5231bc10b0c57	Bacteria	7.33137e-05	-1762.11	-1762.11	1	1	bASV1179|Acidobacteriales	Acidobacteriae	Acidobacteriales			Polypodiopsida	NA	Urticaceae	Mycetia
bASV759	7918231aa8f7c8a9cec81c18ac325dce	Bacteria	0.0176872	-1777.98	-1778.56	0.283046	0.618271	bASV759|MND1	Gammaproteobacteria	Burkholderiales	Nitrosomonadaceae	MND1	NA	Arecales	Phyllanthaceae	Pandanus
bASV1460	fa55e74b3ddf29c621a2682b5383a628	Bacteria	0.0209199	-1708.8	-1709.27	0.329045	0.691405	bASV1460|Altererythrobacter	Alphaproteobacteria	Sphingomonadales	Sphingomonadaceae	Altererythrobacter	NA	Myrtales	NA	Lagerstroemia
bASV2335	4d61a66fc8db252619c900a79e97d7a6	Bacteria	0.0050243	-1715.94	-1715.98	0.765317	1	bASV2335|Acidobacteriales	Acidobacteriae	Acidobacteriales			NA	NA	Urticaceae	Pterospermum
bASV2103	2ad22200894a3939d8f05539f42ffcc1	Bacteria	0.0506347	-1730.64	-1731.15	0.312634	0.668572	bASV2103|uncultured_Acidobacteria	Subgroup_5	Subgroup_5	Subgroup_5	Subgroup_5	NA	Myrtales	Myrtaceae	Alocasia
bASV4056	39e68d39282fc81c61830f551eb09dd6	Bacteria	0.0106054	-1696.33	-1696.38	0.74469	1	bASV4056|metagenome	Phycisphaerae	Phycisphaerales	Phycisphaeraceae	SM1A02	NA	Arecales	NA	Lagerstroemia
bASV183	6bf0280412233eba4d7b6bf5d8369435	Bacteria	7.33137e-05	-1760.25	-1760.24	1	1	bASV183|Bacteria					NA	Sapindales	Meliaceae	NA
bASV1917	89a1d4b913c1790518d55e5d036c395a	Bacteria	0.0469103	-1691.94	-1693.24	0.106725	0.340337	bASV1917|Rhizobacter	Gammaproteobacteria	Burkholderiales	Comamonadaceae	Rhizobacter	NA	Myrtales	Asteraceae	Codiaeum
bASV289	9768a940f82cc312278e486f40327518	Bacteria	0.00464369	-1757.74	-1757.81	0.703035	1	bASV289|Burkholderia-Caballeronia-Paraburkholderia	Gammaproteobacteria	Burkholderiales	Burkholderiaceae	Burkholderia-Caballeronia-Paraburkholderia	Others	Others	Poaceae	Heptapleurum
bASV1468	ed0b1f85a8e232082c93ba5c2cfb91a2	Bacteria	7.33137e-05	-1751.78	-1751.78	1	1	bASV1468|uncultured_bacterium	Gammaproteobacteria	Burkholderiales	Nitrosomonadaceae	oc32	NA	Arecales	Phyllanthaceae	Pandanus
bASV2999	23dc94adbcc8577bd30eeba85cc1906e	Bacteria	0.0120875	-1697.48	-1697.87	0.38126	0.763124	bASV2999|uncultured_bacterium	Thermoleophilia	Solirubrobacterales	67-14	67-14	NA	Arecales	Meliaceae	Dypsis
bASV20	683bba9beb1ad7b6d6085eb735241ca4	Bacteria	0.0246441	-1842.53	-1843.59	0.146123	0.41385	bASV20|Enterobacter	Gammaproteobacteria	Enterobacterales	Enterobacteriaceae	Enterobacter	NA	NA	Araliaceae	Podocarpus
bASV6	655c4d075b5deb919eb3f84b85f0bd37	Bacteria	0.281006	-721.54	-727.113	0.000842452	0.0211197	bASV6|Bradyrhizobium	Alphaproteobacteria	Rhizobiales	Xanthobacteraceae	Bradyrhizobium	NA	NA	Meliaceae	Musa
bASV4198	443c40644ba168cda95fb9098c99925d	Bacteria	0.0484032	-1650.1	-1650.94	0.193534	0.489538	bASV4198|uncultured_bacterium	Gammaproteobacteria	R7C24	R7C24	R7C24	NA	Myrtales	Asteraceae	Fagraea
bASV1991	269cbe4d51250a1f6fcc2b68f668c08f	Bacteria	0.039562	-1739.88	-1741.58	0.065171	0.246321	bASV1991|Comamonadaceae	Gammaproteobacteria	Burkholderiales	Comamonadaceae		NA	Rosales	Moraceae	Alocasia
bASV4352	747de83c5d6adf67ca74f985f7035cc3	Bacteria	0.0262257	-1635.6	-1635.86	0.468344	0.876553	bASV4352|0319-6G20	Oligoflexia	0319-6G20	0319-6G20	0319-6G20	NA	Lamiales	Lamiaceae	NA
bASV2132	1c449e17979c314abdba639216aeaf23	Bacteria	0.000752514	-1734.58	-1734.59	0.959304	1	bASV2132|Hyphomicrobium	Alphaproteobacteria	Rhizobiales	Hyphomicrobiaceae	Hyphomicrobium	Polypodiopsida	Malvales	Poaceae	Lagerstroemia
bASV2810	b7858446864439778cc15acb3b95a71b	Bacteria	7.33137e-05	-1658.93	-1658.93	1	1	bASV2810|Truepera	Deinococci	Deinococcales	Trueperaceae	Truepera	NA	NA	Moraceae	Fagraea
bASV2080	380c0e254ec08c73a73ee4f1d85dca8b	Bacteria	0.00661438	-1737.84	-1737.99	0.578181	1	bASV2080|uncultured_Bradyrhizobiaceae	Alphaproteobacteria	Rhizobiales	Xanthobacteraceae	Pseudolabrys	NA	Fabales	Meliaceae	Bauhinia
bASV2313	95bddd3a5a94ed8a89cd0c2069cd3c41	Bacteria	7.33137e-05	-1712.24	-1712.23	1	1	bASV2313|uncultured_bacterium	MBNT15	MBNT15	MBNT15	MBNT15	NA	NA	NA	Mycetia
bASV838	b268e66dfcca84a768aa18e6bed77b32	Bacteria	0.0224886	-1792.29	-1792.53	0.489523	0.901435	bASV838|Acidipila	Acidobacteriae	Acidobacteriales	Acidobacteriaceae_(Subgroup_1)	Acidipila	NA	Others	Poaceae	Horsfieldia
bASV2730	e058a486e85b2d2b132a3089f7bdbf8e	Bacteria	0.0881974	-1627.74	-1637.17	1.40488e-05	0.00148215	bASV2730|Roseiflexaceae	Chloroflexia	Chloroflexales	Roseiflexaceae		NA	Rosales	Moraceae	Alocasia
bASV10	222450cbe1e33d87d9fe845a57e15b1e	Bacteria	7.33137e-05	-1794.01	-1794.01	1	1	bASV10|Pseudomonas	Gammaproteobacteria	Pseudomonadales	Pseudomonadaceae	Pseudomonas	NA	NA	Acanthaceae	NA
bASV1619	2a64a0fd42250af4b1a8b50eeeb60b55	Bacteria	0.0517422	-1732.08	-1734.35	0.0333521	0.168895	bASV1619|uncultured_organism	Thermoleophilia	Gaiellales			NA	Rosales	Moraceae	Alocasia
bASV1385	a004f5373da88ed181baaf1ef5048383	Bacteria	7.33137e-05	-1704.02	-1704.02	1	1	bASV1385|Devosia	Alphaproteobacteria	Rhizobiales	Devosiaceae	Devosia	NA	NA	Araceae	Mycetia
bASV176	f53a2cead49c587e661324420ce0cb72	Bacteria	7.33137e-05	-1604.4	-1604.39	1	1	bASV176|Candidatus_Solibacter	Acidobacteriae	Solibacterales	Solibacteraceae	Candidatus_Solibacter	NA	Asparagales	Urticaceae	Alocasia
bASV2650	870091a0c874b9853c6d7d74d03a9c4d	Bacteria	0.107295	-1657.74	-1664.97	0.000143213	0.00711013	bASV2650|uncultured_soil	Coriobacteriia	OPB41	OPB41	OPB41	NA	Myrtales	Myrtaceae	Fagraea
bASV1259	e759ecc9c71d3c0c699d028006e6e2a6	Bacteria	0.0932312	-1752.63	-1756.3	0.00674492	0.067496	bASV1259|uncultured_Xanthomonadaceae	Gammaproteobacteria	Xanthomonadales	Rhodanobacteraceae	Ahniella	NA	Myrtales	Myrtaceae	Alocasia
bASV1326	fd18b38020f31bf02e21aa6e9495cf13	Bacteria	4.27421e-05	-1697.01	-1697.01	1	1	bASV1326|Streptomyces	Actinobacteria	Streptomycetales	Streptomycetaceae	Streptomyces	NA	Arecales	Arecaceae	Dypsis
bASV3382	74d2d554f1efec98a5c74b16d1c09d1c	Bacteria	0.0201277	-1652.13	-1652.45	0.428264	0.827127	bASV3382|Elsterales	Alphaproteobacteria	Elsterales			Others	Myrtales	Myrtaceae	Magnolia
bASV603	ffe409cd998e1a6d0086b8da602e086f	Bacteria	0.0399211	-1783.8	-1785.02	0.117371	0.36066	bASV603|Acidibacter	Gammaproteobacteria	Gammaproteobacteria_Incertae_Sedis	Unknown_Family	Acidibacter	NA	Rosales	Myrtaceae	Alocasia
bASV3106	46ae4f8cb8f0c57b7fe4ca004c977fb2	Bacteria	7.33137e-05	-1706.58	-1706.58	1	1	bASV3106|Empedobacter_brevis	Bacteroidia	Flavobacteriales	Weeksellaceae	Empedobacter	NA	Myrtales	Myrtaceae	Mycetia
bASV751	ecbf3ab18242e6f157d013e6cc995698	Bacteria	0.0701427	-1782.33	-1784.61	0.0328499	0.167693	bASV751|Nakamurella	Actinobacteria	Frankiales	Nakamurellaceae	Nakamurella	NA	Lamiales	Myrtaceae	Mycetia
bASV1593	a210d7d5ec70846a3849919852dc7508	Bacteria	7.33137e-05	-1725.91	-1725.91	1	1	bASV1593|67-14	Thermoleophilia	Solirubrobacterales	67-14	67-14	NA	Arecales	Arecaceae	Fagraea
bASV1441	401dc5e97a1ddae29a4ec8dfc24399e7	Bacteria	7.33137e-05	-1745.65	-1745.65	1	1	bASV1441|Nocardioides	Actinobacteria	Propionibacteriales	Nocardioidaceae	Nocardioides	NA	Arecales	Lamiaceae	Pandanus
bASV1531	dd94104b5dbe47f1d2d633f3b261329f	Bacteria	0.0665047	-1703.65	-1705.44	0.0583996	0.232162	bASV1531|Kitasatospora	Actinobacteria	Streptomycetales	Streptomycetaceae	Kitasatospora	Liliopsida	Arecales	Poaceae	Musa
bASV82	c71e369d205e556f1f1b43a9458a1ba5	Bacteria	0.054898	-1710.18	-1713.38	0.0115085	0.0891113	bASV82|uncultured_bacterium	Alphaproteobacteria	Rhizobiales	Methyloligellaceae	Methyloligellaceae	NA	Gentianales	Urticaceae	Brassaiopsis
bASV5122	489a6953c5e6700005e59fb0276f59de	Bacteria	0.0423124	-1601.3	-1604.03	0.0194942	0.124018	bASV5122|Microbacterium	Actinobacteria	Micrococcales	Microbacteriaceae	Microbacterium	NA	Lamiales	Acanthaceae	Alocasia
bASV507	e65350df69b615980edd5856c413f88e	Bacteria	0.010472	-1797.98	-1798.09	0.634417	1	bASV507|Candidatus_Solibacter	Acidobacteriae	Solibacterales	Solibacteraceae	Candidatus_Solibacter	Pinopsida	Arecales	Zingiberaceae	Musa
bASV189	b7f88e53dd16e827ae963061209253d6	Bacteria	0.0366254	-1825.16	-1825.79	0.263578	0.592174	bASV189|Comamonadaceae	Gammaproteobacteria	Burkholderiales	Comamonadaceae		NA	Rosales	Myrtaceae	Bauhinia
bASV2794	8494be9119164c7f4d7bf5c950211018	Bacteria	7.33137e-05	-1677.37	-1677.37	1	1	bASV2794|Dongia	Alphaproteobacteria	Dongiales	Dongiaceae	Dongia	NA	NA	Myrtaceae	Alocasia
bASV2485	8989039e58be0472694d3fdabbbc1f15	Bacteria	7.33137e-05	-1722.12	-1722.11	1	1	bASV2485|Ellin6055	Alphaproteobacteria	Sphingomonadales	Sphingomonadaceae	Ellin6055	NA	Fabales	Myrtaceae	Pandanus
bASV1240	d4cd9142e9f023d0acc29a5f8becb99c	Bacteria	0.0236068	-1751.12	-1751.55	0.352433	0.72373	bASV1240|uncultured_soil	bacteriap25	bacteriap25	bacteriap25	bacteriap25	NA	NA	Myrtaceae	Alocasia
bASV78	17a1113cd00e994065876153d596f87a	Bacteria	7.33137e-05	-1498.92	-1498.91	1	1	bASV78|Sphingomonas	Alphaproteobacteria	Sphingomonadales	Sphingomonadaceae	Sphingomonas	NA	NA	Meliaceae	Dypsis
bASV1112	c9a27b7f2f07c26f0b1ee5b8bfbce4a3	Bacteria	7.33137e-05	-1731.95	-1731.95	1	1	bASV1112|Mesorhizobium	Alphaproteobacteria	Rhizobiales	Rhizobiaceae	Mesorhizobium	NA	NA	Myrtaceae	Brassaiopsis
bASV2292	767a75e71b49eacb8242b74f2a5d48f0	Bacteria	0.0547392	-1721.22	-1721.53	0.427258	0.825815	bASV2292|Gaiellales	Thermoleophilia	Gaiellales			NA	Others	Acanthaceae	Begonia
bASV2162	8c89fcfe999f4a621a37d4f9e2885d85	Bacteria	7.33137e-05	-1737.68	-1737.68	1	1	bASV2162|uncultured_Acidimicrobiia	Acidimicrobiia				NA	Arecales	Apocynaceae	Fagraea
bASV294	740818616ef8dd78df74b357bfbb10f7	Bacteria	7.33137e-05	-1824.94	-1824.94	1	1	bASV294|Gaiellales	Thermoleophilia	Gaiellales			NA	Myrtales	Myrtaceae	Brassaiopsis
bASV7	0f937287ee1b12755bc21ec245b1f6d7	Bacteria	0.268518	-1258.6	-1260.94	0.0306419	0.160523	bASV7|Bacillus	Bacilli	Bacillales	Bacillaceae	Bacillus	Others	NA	Araceae	Brassaiopsis
bASV3926	c9e3bdc07081c2700199c9cf0e2c8476	Bacteria	7.33137e-05	-1635.41	-1635.41	1	1	bASV3926|Solirubrobacter	Thermoleophilia	Solirubrobacterales	Solirubrobacteraceae	Solirubrobacter	NA	NA	Myrtaceae	Alocasia
bASV416	3360778ccd04fa5fefe392d53afc4a16	Bacteria	7.33137e-05	-1795.19	-1795.19	1	1	bASV416|Bacillus	Bacilli	Bacillales	Bacillaceae	Bacillus	NA	Arecales	Myrtaceae	Brassaiopsis
bASV3057	092b47794f6c19c831195f74aeb7010f	Bacteria	0.0277594	-1717.04	-1718.32	0.109585	0.346349	bASV3057|Alphaproteobacteria	Alphaproteobacteria				NA	Myrtales	Myrtaceae	Dypsis
bASV3337	b5b184edf911b0d4b76b69ad9e43d01c	Bacteria	0.284369	-1661.04	-1665.05	0.00465061	0.0530421	bASV3337|Xanthobacteraceae	Alphaproteobacteria	Rhizobiales	Xanthobacteraceae		Polypodiopsida	Arecales	Urticaceae	Begonia
bASV1703	794c6e3f74712b679f00c789a3d9183c	Bacteria	0.0299813	-1750.32	-1750.95	0.260615	0.587418	bASV1703|Microscillaceae	Bacteroidia	Cytophagales	Microscillaceae		NA	Myrtales	Myrtaceae	Alocasia
bASV5638	35ad788a2156e43ac706dc1a68042b79	Bacteria	0.0039726	-1620.11	-1620.13	0.827222	1	bASV5638|Comamonadaceae	Gammaproteobacteria	Burkholderiales	Comamonadaceae		NA	NA	Myrtaceae	NA
bASV2556	b02875515127a7e24aba90f7c7ceb790	Bacteria	0.0515539	-1607.93	-1609.96	0.0438083	0.192574	bASV2556|Devosia	Alphaproteobacteria	Rhizobiales	Devosiaceae	Devosia	NA	NA	Asteraceae	Pandanus
bASV62	dcc241e9128c1edfd515c1ec8394dea3	Bacteria	0.0680825	-1837.34	-1839.67	0.0306845	0.160523	bASV62|Xanthobacteraceae	Alphaproteobacteria	Rhizobiales	Xanthobacteraceae		NA	Others	Urticaceae	Horsfieldia
bASV3383	e75064c2b3821745fc606bcdeb782e65	Bacteria	0.0294197	-1700.07	-1700.31	0.486473	0.897123	bASV3383|Elsterales	Alphaproteobacteria	Elsterales			NA	NA	Lauraceae	Alocasia
bASV1486	28433982df22ac7c350fae5e32bc5b26	Bacteria	0.0938291	-1674.2	-1679.55	0.00106824	0.0233171	bASV1486|Steroidobacter	Gammaproteobacteria	Steroidobacterales	Steroidobacteraceae	Steroidobacter	NA	Myrtales	Myrtaceae	Fagraea
bASV2520	542480697f3a7a02705e0e01273f1519	Bacteria	7.33137e-05	-1628.82	-1628.82	1	1	bASV2520|Nocardioides_simplex	Actinobacteria	Propionibacteriales	Nocardioidaceae	Nocardioides	NA	Arecales	Myrtaceae	Fagraea
bASV1261	55618975016d3d65e8bbdaf5a343b11f	Bacteria	7.42464e-05	-1770.01	-1770.01	1	1	bASV1261|uncultured_bacterium	Subgroup_5	Subgroup_5	Subgroup_5	Subgroup_5	Polypodiopsida	Arecales	Poaceae	Lagerstroemia
bASV2428	216267b12f7e180d9379e0ceff533a33	Bacteria	0.0175946	-1703.23	-1703.6	0.387412	0.770563	bASV2428|MND1	Gammaproteobacteria	Burkholderiales	Nitrosomonadaceae	MND1	NA	Arecales	Myrtaceae	Codiaeum
bASV1310	9efae48a4655c40fe4c39493577f0c3b	Bacteria	0.116872	-1742.74	-1747.36	0.00237306	0.0359796	bASV1310|Bryobacter	Acidobacteriae	Bryobacterales	Bryobacteraceae	Bryobacter	NA	Lamiales	Lamiaceae	Magnolia
bASV2935	7305a288a1f54b83caddf8afc382c694	Bacteria	0.386879	-1656.9	-1666.43	1.27092e-05	0.00139912	bASV2935|Phyllobacterium	Alphaproteobacteria	Rhizobiales	Rhizobiaceae	Phyllobacterium	NA	NA	Meliaceae	Alocasia
bASV1420	02dabeb743ee3a3f6541eb8fd061325c	Bacteria	7.33137e-05	-1724.34	-1724.33	1	1	bASV1420|Acetobacteraceae	Alphaproteobacteria	Acetobacterales	Acetobacteraceae		Pinopsida	Others	Poaceae	Podocarpus
bASV1648	ffe16122636b3cde73c1ec0d39db6e30	Bacteria	0.0177458	-1736.15	-1736.42	0.461512	0.8714	bASV1648|Jatrophihabitans	Actinobacteria	Frankiales	Frankiaceae	Jatrophihabitans	NA	NA	Poaceae	Fagraea
bASV1582	6c1d897e5df2b5e3b7d92262556de8e6	Bacteria	0.00150153	-1664.08	-1664.09	0.917032	1	bASV1582|Chitinophagaceae	Bacteroidia	Chitinophagales	Chitinophagaceae		Others	Asparagales	Poaceae	Begonia
bASV2262	918758b50d0d5db3fbb68346e1dff4c7	Bacteria	0.038922	-1691.35	-1692.64	0.108101	0.343601	bASV2262|uncultured_bacterium	Desulfuromonadia	Desulfuromonadia	Desulfuromonadaceae	Desulfuromonas	NA	Myrtales	Myrtaceae	Alocasia
bASV598	77a73490b4df22009e9e7290c3bb5f55	Bacteria	0.0717251	-1759.45	-1759.37	1	1	bASV598|Acidothermus	Actinobacteria	Frankiales	Acidothermaceae	Acidothermus	Others	Malvales	Poaceae	Horsfieldia
bASV2835	4d2536f5bb325a1fc66c4bbcaec5c1ab	Bacteria	0.0212124	-1731.17	-1731.43	0.477964	0.884006	bASV2835|uncultured_bacterium	Alphaproteobacteria	Rhizobiales	A0839	A0839	NA	Sapindales	Euphorbiaceae	Pandanus
bASV825	4e4beee7dfc9628beb311d5901ae0309	Bacteria	0.059898	-1778.75	-1779.76	0.155291	0.429221	bASV825|mle1-7	Gammaproteobacteria	Burkholderiales	Nitrosomonadaceae	mle1-7	NA	Lamiales	Urticaceae	Mycetia
bASV1505	19b8c3822273324cfdfa75d8b03b5acf	Bacteria	0.0556568	-1772.84	-1774.58	0.0624249	0.241564	bASV1505|uncultured_proteobacterium	Polyangia	Haliangiales	Haliangiaceae	Haliangium	NA	Myrtales	Myrtaceae	Fagraea
bASV869	55cea5a9958fc32be2068049c1ce2a61	Bacteria	7.33137e-05	-1754.66	-1754.65	1	1	bASV869|Reyranella	Alphaproteobacteria	Reyranellales	Reyranellaceae	Reyranella	NA	Others	Poaceae	NA
bASV5927	6d3bc12bd59b16a102514a32b48ee6a3	Bacteria	0.182763	-1626.11	-1626.42	0.432338	0.832457	bASV5927|Pedosphaeraceae	Verrucomicrobiae	Pedosphaerales	Pedosphaeraceae	Pedosphaeraceae	NA	NA	Urticaceae	Dypsis
bASV495	21604058a40f02d761524461a99875d7	Bacteria	0.078522	-1809.77	-1811.99	0.0354234	0.172485	bASV495|uncultured_bacterium	MB-A2-108	MB-A2-108	MB-A2-108	MB-A2-108	NA	Rosales	Lamiaceae	Alocasia
bASV1451	fb4947cca21cb06ab82838e9824e7c50	Bacteria	0.0068152	-1719.05	-1719.13	0.689402	1	bASV1451|Microbacterium_arborescens	Actinobacteria	Micrococcales	Microbacteriaceae	Microbacterium	NA	Myrtales	Araliaceae	Caryota
bASV414	bd1ff7eb073bf897d7efb5c9bcbdff20	Bacteria	7.33137e-05	-1803.63	-1803.62	1	1	bASV414|uncultured_bacterium	Thermoleophilia	Solirubrobacterales	67-14	67-14	NA	Sapindales	Meliaceae	Clerodendrum
bASV2107	983486d0de87333206ee7b6a072839ed	Bacteria	0.0133984	-1624.53	-1624.77	0.483096	0.892775	bASV2107|Luteimonas	Gammaproteobacteria	Xanthomonadales	Xanthomonadaceae	Luteimonas	NA	NA	Acanthaceae	Mycetia
bASV2133	73b47e8572012344c96f0812e4fbaa5e	Bacteria	7.33137e-05	-1677.6	-1677.6	1	1	bASV2133|Xanthobacteraceae	Alphaproteobacteria	Rhizobiales	Xanthobacteraceae		NA	NA	Lamiaceae	Alocasia
bASV182	f90ef8f640f917f7dccfeb6700d2e63f	Bacteria	0.0819898	-1841.77	-1842.35	0.28108	0.616707	bASV182|Xanthobacteraceae	Alphaproteobacteria	Rhizobiales	Xanthobacteraceae		Polypodiopsida	Others	Urticaceae	Clerodendrum
bASV3335	bf6f2c2076e7c6cd694927c108c9488b	Bacteria	0.131039	-1680.29	-1681.13	0.194452	0.490881	bASV3335|metagenome	Thermoleophilia	Solirubrobacterales	Solirubrobacteraceae	Conexibacter	NA	Arecales	Urticaceae	Dypsis
bASV1822	8072cdc3efcb5da7a687291b0c11431d	Bacteria	7.33137e-05	-1698.72	-1698.72	1	1	bASV1822|Nocardioides	Actinobacteria	Propionibacteriales	Nocardioidaceae	Nocardioides	NA	Lamiales	Lamiaceae	Fagraea
bASV2184	f7d51205544862ceae071070027d3254	Bacteria	7.33137e-05	-1720.73	-1720.72	1	1	bASV2184|Xanthobacteraceae	Alphaproteobacteria	Rhizobiales	Xanthobacteraceae		NA	NA	Myrtaceae	Alocasia
bASV1651	239ccdaf97d379a2c97215c111ea4b0a	Bacteria	0.0860606	-1732.66	-1736.42	0.00610081	0.063569	bASV1651|TRA3-20	Gammaproteobacteria	Burkholderiales	TRA3-20	TRA3-20	NA	Rosales	Moraceae	Alocasia
bASV847	4017dfa426240579127212e5b8804372	Bacteria	0.044509	-1725.72	-1726.46	0.223282	0.531843	bASV847|metagenome	Dehalococcoidia	S085	S085	S085	NA	NA	Urticaceae	Mycetia
bASV1027	ae064385a72cbab7bc6adccd16a96dd5	Bacteria	7.33137e-05	-1775.6	-1775.59	1	1	bASV1027|Acidobacteriales	Acidobacteriae	Acidobacteriales			Polypodiopsida	Others	Poaceae	Musa
bASV1412	5ff0bdfa8964674683a4db28825a836a	Bacteria	0.0714798	-1754.2	-1757.11	0.0159678	0.111073	bASV1412|uncultured_soil	Gammaproteobacteria	CCM19a	CCM19a	CCM19a	NA	Arecales	Myrtaceae	Alocasia
bASV2255	4e08ea1b0d6f4bda3a9165175be31932	Bacteria	0.0721762	-1724.3	-1728	0.0065278	0.0663791	bASV2255|Xanthobacteraceae	Alphaproteobacteria	Rhizobiales	Xanthobacteraceae		NA	Rosales	Myrtaceae	Alocasia
bASV1467	b8fa61768771149dac86f52fd0550b91	Bacteria	0.0161675	-1668.8	-1669.19	0.375889	0.755957	bASV1467|uncultured_Chloroflexi	Chloroflexia	Chloroflexales	Roseiflexaceae		NA	Arecales	Arecaceae	Fagraea
bASV3971	7b6919d6b16eca4151ff7e872cf6830d	Bacteria	0.00636607	-1634.86	-1634.94	0.688698	1	bASV3971|Reyranella	Alphaproteobacteria	Reyranellales	Reyranellaceae	Reyranella	NA	Myrtales	Acanthaceae	Alocasia
bASV1706	b6bdef8f8721387e74747521fd3dd597	Bacteria	7.33137e-05	-1690.85	-1690.85	1	1	bASV1706|MB-A2-108	MB-A2-108	MB-A2-108	MB-A2-108	MB-A2-108	NA	Rosales	Myrtaceae	Fagraea
bASV829	c45cf24d99216cfc7740bb2d6af0fec0	Bacteria	7.33137e-05	-1798.24	-1798.24	1	1	bASV829|uncultured_bacterium	Thermoleophilia	Solirubrobacterales	Solirubrobacteraceae	Solirubrobacter	NA	Sapindales	Myrtaceae	Brassaiopsis
bASV685	522b7b48175835a7dd19f2294e00b7ab	Bacteria	7.33137e-05	-1751.11	-1751.11	1	1	bASV685|uncultured_bacterium	AD3	AD3	AD3	AD3	Others	Others	Poaceae	Horsfieldia
bASV3353	a170d26133fca6a654a3a6146f606fe1	Bacteria	0.0257172	-1714.91	-1715.12	0.511793	0.928266	bASV3353|Pedosphaeraceae	Verrucomicrobiae	Pedosphaerales	Pedosphaeraceae	Pedosphaeraceae	NA	NA	Urticaceae	Alocasia
bASV5399	5201171e7d2bc6b5f8ec09fe06b093b8	Bacteria	0.0271437	-1656.18	-1657.14	0.16677	0.447786	bASV5399|uncultured_organism	Gemmatimonadetes	Gemmatimonadales	Gemmatimonadaceae		NA	Malvales	Lauraceae	Pterospermum
bASV3042	e91c15251bf818c746af40944f315a29	Bacteria	7.33137e-05	-1666.26	-1666.25	1	1	bASV3042|Candidatus_Solibacter	Acidobacteriae	Solibacterales	Solibacteraceae	Candidatus_Solibacter	NA	NA	Urticaceae	Pterospermum
bASV1541	462b8dd00a4492114f7b90f31681e1cc	Bacteria	7.33137e-05	-1690.34	-1690.33	1	1	bASV1541|uncultured_bacterium	Gammaproteobacteria	JG36-TzT-191	JG36-TzT-191	JG36-TzT-191	Polypodiopsida	NA	Urticaceae	Musa
bASV1312	dfc463e6d05ced8ee35ba70f90d72c87	Bacteria	7.33137e-05	-1749.43	-1749.42	1	1	bASV1312|uncultured_bacterium	RCP2-54	RCP2-54	RCP2-54	RCP2-54	Others	NA	NA	Musa
bASV3074	e01a6df159728f4e62593067c512073a	Bacteria	0.0908701	-1698.38	-1700.27	0.0521052	0.215573	bASV3074|uncultured_bacterium	Alphaproteobacteria	Rhizobiales	Beijerinckiaceae	Neo-b11	NA	Arecales	Araliaceae	Fagraea
bASV1455	10e4bd826e6d1999b6a933c1d30f1f11	Bacteria	7.33137e-05	-1759.6	-1759.6	1	1	bASV1455|uncultured_bacterium	Alphaproteobacteria	Rhizobiales	Rhizobiales_Incertae_Sedis	Bauldia	NA	Arecales	Lamiaceae	Dypsis
bASV1570	d89dd3910776423e3bb738404e4df0b8	Bacteria	0.0843694	-1732.63	-1733.23	0.273798	0.605705	bASV1570|Solirubrobacter_sp.	Thermoleophilia	Solirubrobacterales	Solirubrobacteraceae	Solirubrobacter	NA	Lamiales	Acanthaceae	NA
bASV1173	ff15111b492b545a8df8869c0b0d5f23	Bacteria	0.0236068	-1783.16	-1783.58	0.360545	0.732665	bASV1173|uncultured_bacterium	Alphaproteobacteria	Rhizobiales	A0839	A0839	Others	Malpighiales	Urticaceae	Alocasia
bASV38	5a3eb05607a1c0d7722854b1d986c43b	Bacteria	0.0924695	-1694.36	-1695.01	0.253102	0.578388	bASV38|Bradyrhizobium	Alphaproteobacteria	Rhizobiales	Xanthobacteraceae	Bradyrhizobium	NA	NA	Araliaceae	Musa
bASV2633	d97c36b9b5ed93379b34961a9b72fd81	Bacteria	0.100078	-1670.97	-1672.6	0.0709321	0.261616	bASV2633|Candidatus_Solibacter	Acidobacteriae	Solibacterales	Solibacteraceae	Candidatus_Solibacter	NA	Lamiales	Urticaceae	NA
bASV366	fcd39ca119905f5b463012932ebc4ade	Bacteria	0.0686406	-1778.67	-1780.89	0.0352349	0.172229	bASV366|Agromyces	Actinobacteria	Micrococcales	Microbacteriaceae	Agromyces	NA	Fabales	Moraceae	Alocasia
bASV309	d5c55c9e299fda0103b01bc9f3b1e94b	Bacteria	0.00746384	-1732.71	-1732.77	0.737852	1	bASV309|uncultured_bacterium	Alphaproteobacteria	Rhizobiales	Xanthobacteraceae	Rhodoplanes	NA	Rosales	Myrtaceae	Bauhinia
bASV1216	ac667e8101d1268e66a3ed085a0484b9	Bacteria	0.0313634	-1770.6	-1771.3	0.238675	0.557496	bASV1216|Lysobacter_yangpyeongensis	Gammaproteobacteria	Xanthomonadales	Xanthomonadaceae	Lysobacter	NA	Myrtales	Myrtaceae	Brassaiopsis
bASV3627	8f7e2aa0028290c942ab1e76f2b89941	Bacteria	0.022656	-1658.82	-1658.91	0.662346	1	bASV3627|uncultured_bacterium	Acidimicrobiia	IMCC26256	IMCC26256	IMCC26256	NA	Arecales	Arecaceae	Dypsis
bASV103	63da74844f7181950b06681600131717	Bacteria	7.33137e-05	-1782.28	-1782.27	1	1	bASV103|Pantoea	Gammaproteobacteria	Enterobacterales	Erwiniaceae	Pantoea	NA	Sapindales	NA	Podocarpus
bASV2055	af1f7d32328db9f856f2b9db2e3c8dd9	Bacteria	7.33137e-05	-1680.92	-1680.92	1	1	bASV2055|uncultured_proteobacterium					Polypodiopsida	Others	NA	Horsfieldia
bASV2000	9407a6c522eea0c5f57f6c97ff36657c	Bacteria	7.33137e-05	-1661.95	-1661.94	1	1	bASV2000|Acidobacteriales	Acidobacteriae	Acidobacteriales			Polypodiopsida	Rosales	Urticaceae	Musa
bASV4113	3ce1185f2171eb2db63a2cc553b2e087	Bacteria	0.149996	-1635.19	-1635.73	0.30213	0.650494	bASV4113|metagenome	Alphaproteobacteria	Dongiales	Dongiaceae	Dongia	NA	NA	Urticaceae	NA
bASV1119	4536bd3bcbf6cab2d1e3e389b7421ac4	Bacteria	0.0105258	-1739.54	-1739.8	0.467727	0.876553	bASV1119|uncultured_bacterium	JG30-KF-CM66	JG30-KF-CM66	JG30-KF-CM66	JG30-KF-CM66	NA	Asparagales	Phyllanthaceae	Mycetia
bASV4031	7c67feb5dc0d499c32ca908352baa0e2	Bacteria	0.00791176	-1617.55	-1617.69	0.592015	1	bASV4031|Microtrichaceae	Acidimicrobiia	Microtrichales	Microtrichaceae		NA	NA	NA	Alocasia
bASV1586	32e5f4d0d5c4663ae2a0d4fd3861d6af	Bacteria	7.33137e-05	-1702.59	-1702.59	1	1	bASV1586|Comamonadaceae	Gammaproteobacteria	Burkholderiales	Comamonadaceae		NA	NA	Myrtaceae	Mycetia
bASV2789	c7de97707187ba25fab1f98f050048c5	Bacteria	0.00989007	-1670.88	-1671.03	0.581283	1	bASV2789|Clostridium_sensu_stricto_8	Clostridia	Clostridiales	Clostridiaceae	Clostridium_sensu_stricto_8	NA	Arecales	Myrtaceae	Prunus
bASV2026	7678a33c205315b101f5aa89fcaf27ed	Bacteria	0.0471566	-1723.8	-1725.8	0.0451368	0.196706	bASV2026|uncultured_Verrucomicrobia	Verrucomicrobiae	Pedosphaerales	Pedosphaeraceae		NA	Myrtales	Myrtaceae	Magnolia
bASV2747	65578d6b0a533a407dbd47132e3bdc3a	Bacteria	7.33137e-05	-1706.27	-1706.26	1	1	bASV2747|Catellatospora_citrea	Actinobacteria	Micromonosporales	Micromonosporaceae	Catellatospora	NA	NA	NA	NA
bASV6469	888dad70c59f04acdd407f96998a03e1	Bacteria	0.000728354	-1567.51	-1567.51	0.975894	1	bASV6469|Microtrichales	Acidimicrobiia	Microtrichales			NA	Arecales	Apocynaceae	NA
bASV753	5ff3be14ec2045b0c28671f5b8885b11	Bacteria	0.00822448	-1783.14	-1783.18	0.77289	1	bASV753|uncultured_bacterium	Alphaproteobacteria	Acetobacterales	Acetobacteraceae		NA	Arecales	Zingiberaceae	Lagerstroemia
bASV955	04de705dae60a47f97a55b3508d13205	Bacteria	7.33137e-05	-1755.81	-1755.8	1	1	bASV955|uncultured_Photorhabdus	Alphaproteobacteria	Rhizobiales	Rhizobiaceae	Ochrobactrum	NA	NA	NA	Horsfieldia
bASV4310	6c9c911f30308e7e38d8f899d087edad	Bacteria	0.0591414	-1684	-1684.11	0.634759	1	bASV4310|CL500-29_marine_group	Acidimicrobiia	Microtrichales	Ilumatobacteraceae	CL500-29_marine_group	NA	Arecales	Lamiaceae	Fagraea
bASV2112	7861b459beb5ffa5e63f40d509215c9a	Bacteria	7.33137e-05	-1749.44	-1749.43	1	1	bASV2112|Pedosphaera	Verrucomicrobiae	Pedosphaerales	Pedosphaeraceae	Pedosphaera	NA	Others	Poaceae	Musa
bASV4644	4fdd1bbd9c393ab1ea2e2b9541fd75cc	Bacteria	7.33137e-05	-1687.13	-1687.12	1	1	bASV4644|Phreatobacter	Alphaproteobacteria	Rhizobiales	Rhizobiales_Incertae_Sedis	Phreatobacter	NA	NA	NA	Fagraea
bASV1030	0ad03ed8dedfd58206d1f20b2a7b92be	Bacteria	0.265804	-1777.42	-1783.07	0.000779856	0.0201475	bASV1030|Ramlibacter	Gammaproteobacteria	Burkholderiales	Comamonadaceae	Ramlibacter	NA	Lamiales	Urticaceae	Alocasia
bASV1517	c10e315f15da822a793ec9edb3afd902	Bacteria	0.0355227	-1723.95	-1725.39	0.0898647	0.303383	bASV1517|uncultured_soil	Anaerolineae	SJA-15	SJA-15	SJA-15	NA	Myrtales	Myrtaceae	Syzygium
bASV1082	8971b5bffb9e1031c65bed85a7f97577	Bacteria	0.065682	-1737.4	-1737.27	1	1	bASV1082|Bryobacter	Acidobacteriae	Bryobacterales	Bryobacteraceae	Bryobacter	Others	Others	Zingiberaceae	Horsfieldia
bASV1950	9f8a3417ffa1778cebcb1b606aa242cf	Bacteria	0.0238071	-1736.78	-1737.54	0.215781	0.519351	bASV1950|AKYH767	Bacteroidia	Sphingobacteriales	AKYH767	AKYH767	NA	Arecales	Urticaceae	Fagraea
bASV3	27004065c83927751dd986fde8dc5b7b	Bacteria	0.00949174	-1617.38	-1617.64	0.469087	0.876553	bASV3|Enterobacteriaceae	Gammaproteobacteria	Enterobacterales	Enterobacteriaceae		NA	NA	Asteraceae	Brassaiopsis
bASV2542	ccf0fb311295ac87da4a83181caad3f0	Bacteria	7.33137e-05	-1644.15	-1644.15	1	1	bASV2542|Sphingomonas	Alphaproteobacteria	Sphingomonadales	Sphingomonadaceae	Sphingomonas	NA	NA	NA	NA
bASV2388	d51e62def84e6e7fdfe68949249f5f41	Bacteria	7.33137e-05	-1697.25	-1697.24	1	1	bASV2388|Paenibacillus_qinlingensis	Bacilli	Paenibacillales	Paenibacillaceae	Paenibacillus	Polypodiopsida	NA	Acanthaceae	Alocasia
bASV2655	5e85bfd596cf4c659a06d89607900b67	Bacteria	0.0886919	-1584.46	-1587.76	0.0101999	0.0838512	bASV2655|Novosphingobium	Alphaproteobacteria	Sphingomonadales	Sphingomonadaceae	Novosphingobium	NA	Asparagales	Asparagaceae	Fagraea
bASV3400	df62f0a627add74fd03c6bb3dd7b3cca	Bacteria	0.0598571	-1697.53	-1698.39	0.189302	0.482691	bASV3400|Bryobacter	Acidobacteriae	Bryobacterales	Bryobacteraceae	Bryobacter	NA	NA	NA	Fagraea
bASV2966	05cb2bbb57b44a9df74b900ead1b9b41	Bacteria	7.33137e-05	-1734.32	-1734.31	1	1	bASV2966|uncultured_bacterium	Alphaproteobacteria	Rhizobiales	Rhizobiales_Incertae_Sedis	Nordella	NA	Sapindales	Meliaceae	NA
bASV429	942206566d8c41c0cd5a42a2b1e77677	Bacteria	0.0202197	-1792.62	-1792.72	0.655551	1	bASV429|Proteobacteria					NA	NA	Urticaceae	Mycetia
bASV383	d9e377e98f41f337abc04563099cb923	Bacteria	0.0656456	-1782.94	-1783.51	0.287222	0.623711	bASV383|metagenome	Alphaproteobacteria	Rhizobiales	Rhizobiales_Incertae_Sedis	Bauldia	Magnoliopsida	Rosales	Myrtaceae	Alocasia
bASV2034	a57b07a61a820332a231291a5e1a6683	Bacteria	7.33137e-05	-1688.16	-1688.16	1	1	bASV2034|uncultured_bacterium	MB-A2-108	MB-A2-108	MB-A2-108	MB-A2-108	NA	Myrtales	Myrtaceae	Codiaeum
bASV130	51b6eece063b9d7ce02d700e23ed34de	Bacteria	0.0536654	-1764.44	-1767.31	0.0165538	0.113589	bASV130|Exiguobacterium	Bacilli	Exiguobacterales	Exiguobacteraceae	Exiguobacterium	Others	Arecales	Acanthaceae	Pandanus
bASV1161	ab74b0ada1dd21ccbfeaed926aed6dda	Bacteria	0.0968357	-1777.86	-1780.84	0.0146745	0.104664	bASV1161|uncultured_soil	Gammaproteobacteria	Cellvibrionales	Spongiibacteraceae	BD1-7_clade	NA	Myrtales	Myrtaceae	Cinnamomum
bASV561	92cedd3bde6d0972826cc9b81502b6d5	Bacteria	0.065618	-1755.38	-1756.53	0.130122	0.38351	bASV561|metagenome	Alphaproteobacteria	Rhizobiales	Rhizobiales_Incertae_Sedis	Bauldia	NA	Arecales	Araceae	Dypsis
bASV2671	102da145208a03ee33e0687af456b557	Bacteria	0.080741	-1617.5	-1621.54	0.00448834	0.0516568	bASV2671|Rhizobiaceae	Alphaproteobacteria	Rhizobiales	Rhizobiaceae		NA	Rosales	Moraceae	Mycetia
bASV200	79bacc546dad852cbdea72d7a9938c47	Bacteria	7.33137e-05	-1832.16	-1832.15	1	1	bASV200|uncultured_bacterium	Gammaproteobacteria	Burkholderiales	B1-7BS	B1-7BS	NA	NA	Araceae	Brassaiopsis
bASV776	1055ed2addefc4492477293a07dd4c20	Bacteria	0.0284782	-1757.81	-1758.62	0.205001	0.506403	bASV776|Arthrobacter_crystallopoietes	Actinobacteria	Micrococcales	Micrococcaceae	Arthrobacter	NA	Myrtales	Myrtaceae	Pandanus
bASV272	b8a85ffbb24f54ac6fa3b69b12e273df	Bacteria	7.33137e-05	-1811.15	-1811.15	1	1	bASV272|Sphingomonas	Alphaproteobacteria	Sphingomonadales	Sphingomonadaceae	Sphingomonas	NA	Arecales	Myrtaceae	Pandanus
bASV584	d6933e6ec862d5c9a0c768b7b60fd6c3	Bacteria	0.0131598	-1799.85	-1799.86	0.866514	1	bASV584|uncultured_Syntrophobacterales	bacteriap25	bacteriap25	bacteriap25	bacteriap25	NA	Sapindales	Myrtaceae	Fagraea
bASV933	90b2c0a16a2d9aa9bf9fab65fc495448	Bacteria	0.0180952	-1773.86	-1774.12	0.474937	0.880336	bASV933|Kitasatospora	Actinobacteria	Streptomycetales	Streptomycetaceae	Kitasatospora	Polypodiopsida	Lamiales	Acanthaceae	Heptapleurum
bASV2493	0141132606806252c21e34dd78aca314	Bacteria	0.0756702	-1684.65	-1687.27	0.0219815	0.132203	bASV2493|A21b	Gammaproteobacteria	Burkholderiales	A21b	A21b	NA	Myrtales	Myrtaceae	Pandanus
bASV1610	ce6529db96ede3ecf3391bf5d03e254c	Bacteria	0.0364961	-1685.38	-1687.37	0.0460631	0.198691	bASV1610|Streptomyces	Actinobacteria	Streptomycetales	Streptomycetaceae	Streptomyces	NA	Arecales	NA	NA
bASV2173	a85df6b7bf738d26820721e598d2d052	Bacteria	7.33137e-05	-1675.04	-1675.03	1	1	bASV2173|Micromonosporaceae	Actinobacteria	Micromonosporales	Micromonosporaceae		Polypodiopsida	NA	NA	NA
bASV1058	18478f6ab246eaf0c8241fcd9c3acdae	Bacteria	0.0196496	-1778.94	-1779.3	0.399893	0.788133	bASV1058|Xanthobacteraceae	Alphaproteobacteria	Rhizobiales	Xanthobacteraceae		NA	NA	Moraceae	Alocasia
bASV3330	caeed0921313c8d6d07abd324effe473	Bacteria	0.0464408	-1677.44	-1678.35	0.176554	0.459361	bASV3330|uncultured_bacterium	Verrucomicrobiae	Pedosphaerales	Pedosphaeraceae	ADurb.Bin063-1	NA	Arecales	Zingiberaceae	Begonia
bASV395	c45c65d88d6f8f2b5ef5014d98fcbe59	Bacteria	7.33137e-05	-1797.47	-1797.47	1	1	bASV395|Burkholderia-Caballeronia-Paraburkholderia	Gammaproteobacteria	Burkholderiales	Burkholderiaceae	Burkholderia-Caballeronia-Paraburkholderia	NA	Asparagales	Zingiberaceae	Lagerstroemia
bASV497	2eb1d4b5a1584422b99378832137e3c3	Bacteria	7.33137e-05	-1791.01	-1791.01	1	1	bASV497|Gaiellales	Thermoleophilia	Gaiellales			NA	Arecales	Lamiaceae	Dypsis
bASV7445	9314006e64487fc3ad6307e7b7542453	Bacteria	0.00682797	-1596.51	-1596.54	0.788206	1	bASV7445|Roseococcus	Alphaproteobacteria	Acetobacterales	Acetobacteraceae	Roseococcus	NA	Myrtales	NA	Fagraea
bASV2550	5d1bbc4a5f6913f20fc4d6ab034e9999	Bacteria	0.0130476	-1698.8	-1698.99	0.537302	0.95461	bASV2550|Dongia	Alphaproteobacteria	Dongiales	Dongiaceae	Dongia	NA	Arecales	Myrtaceae	Bauhinia
bASV436	7a523a6418f1adcbc4f97229dd7d15cb	Bacteria	0.0621195	-1785.97	-1787.58	0.072698	0.265495	bASV436|Bacillus_litoralis	Bacilli	Bacillales	Bacillaceae	Bacillus	NA	NA	Urticaceae	NA
bASV197	70fe79b736fb24ff3e1d0735e82fc97e	Bacteria	0.0787343	-1756.22	-1758	0.0590749	0.233715	bASV197|Rhizobium_rhizogenes	Alphaproteobacteria	Rhizobiales	Rhizobiaceae	Allorhizobium-Neorhizobium-Pararhizobium-Rhizobium	Polypodiopsida	Asparagales	Poaceae	NA
bASV6755	d6b44a86907b3487b7abd286d885db68	Bacteria	0.0109162	-1590.27	-1590.49	0.501071	0.914058	bASV6755|Bryobacter	Acidobacteriae	Bryobacterales	Bryobacteraceae	Bryobacter	NA	NA	NA	Alocasia
bASV1337	e28c714a366e7704986772d879d43bf3	Bacteria	7.33137e-05	-1719.8	-1719.8	1	1	bASV1337|Acidobacteriales	Acidobacteriae	Acidobacteriales			Pinopsida	Malvales	Poaceae	Lagerstroemia
bASV1715	40077c56158aebfb02605fb338dbba4a	Bacteria	0.0101681	-1759.65	-1759.74	0.670453	1	bASV1715|uncultured_bacterium	Alphaproteobacteria	Elsterales			NA	Others	Lamiaceae	Mycetia
bASV1617	813aafdfa3f331b703e087e69988d5ef	Bacteria	7.33137e-05	-1720.25	-1720.25	1	1	bASV1617|bacterium_enrichment	Acidimicrobiia	IMCC26256	IMCC26256	IMCC26256	Others	Others	Poaceae	Horsfieldia
bASV393	2bf7011f65d0a26173c52467cc202c34	Bacteria	0.0814198	-1813.77	-1815.21	0.0901984	0.304104	bASV393|uncultured_bacterium	Verrucomicrobiae	Pedosphaerales	Pedosphaeraceae	ADurb.Bin063-1	Magnoliopsida	Myrtales	Myrtaceae	Fagraea
bASV3534	25fe84be87ea4b1939e04319c62ca9be	Bacteria	0.0472889	-1660.97	-1661.21	0.485881	0.896685	bASV3534|Mesorhizobium	Alphaproteobacteria	Rhizobiales	Rhizobiaceae	Mesorhizobium	NA	NA	Lamiaceae	Fagraea
bASV2955	d81b22d230cc46e6ac788bc8bf9bccee	Bacteria	0.0209374	-1644.55	-1644.94	0.376785	0.757159	bASV2955|Chitinophagaceae	Bacteroidia	Chitinophagales	Chitinophagaceae		NA	Myrtales	Myrtaceae	Alocasia
bASV2672	3bc4821711dc5a1d077605d42b97b28d	Bacteria	0.0229069	-1715.26	-1715.73	0.336225	0.702411	bASV2672|metagenome	Acidimicrobiia	Microtrichales	Ilumatobacteraceae		NA	Arecales	Arecaceae	Fagraea
bASV2533	241720d34f178869157312b613b28968	Bacteria	7.33137e-05	-1709.02	-1709.01	1	1	bASV2533|Gammaproteobacteria	Gammaproteobacteria				NA	NA	NA	NA
bASV1440	74b3f626119038456175fbb640d3d3a1	Bacteria	0.0278235	-1755.55	-1756.49	0.169225	0.450048	bASV1440|uncultured_bacterium	Alphaproteobacteria	Rhizobiales	Rhizobiales_Incertae_Sedis	Bauldia	Others	Myrtales	Myrtaceae	Alocasia
bASV5383	a75cc12593863d5f567658fe1a9e13c6	Bacteria	7.33137e-05	-1698.77	-1698.77	1	1	bASV5383|uncultured_bacterium	Gammaproteobacteria	Nitrosococcales	Nitrosococcaceae	3PJM14	NA	NA	Myrtaceae	Polyalthia
bASV1180	f17e20435630f8497e8881cdfa29aaa5	Bacteria	0.148038	-1752.06	-1754.29	0.0347817	0.171337	bASV1180|Microtrichales	Acidimicrobiia	Microtrichales			NA	Arecales	Urticaceae	Pandanus
bASV3111	0c40be81842716f3210a4587095ee447	Bacteria	0.0516382	-1692.62	-1693.4	0.214328	0.518174	bASV3111|planctomycete_A-2	OM190	OM190	OM190	OM190	NA	Myrtales	Myrtaceae	Fagraea
bASV1175	5817a7ff3b5d805d2d45fac7761cd581	Bacteria	0.0205825	-1780.55	-1780.91	0.4004	0.788347	bASV1175|Hyphomicrobium	Alphaproteobacteria	Rhizobiales	Hyphomicrobiaceae	Hyphomicrobium	Polypodiopsida	Others	Acanthaceae	Mycetia
bASV1367	58cde3b4620a928277bb05684fb16e9d	Bacteria	0.00158564	-1695.8	-1695.81	0.907569	1	bASV1367|Bradyrhizobium	Alphaproteobacteria	Rhizobiales	Xanthobacteraceae	Bradyrhizobium	NA	Arecales	Arecaceae	Magnolia
bASV2427	8dfeda3f7326d8199f81358091129af7	Bacteria	0.0855399	-1627.52	-1629.45	0.0496058	0.208295	bASV2427|Lechevalieria	Actinobacteria	Pseudonocardiales	Pseudonocardiaceae	Lechevalieria	Others	Arecales	Asteraceae	Dypsis
bASV698	f92b0a999ac9d88cb787b9e56c798a61	Bacteria	7.33137e-05	-1797.4	-1797.4	1	1	bASV698|Candidatus_Solibacter	Acidobacteriae	Solibacterales	Solibacteraceae	Candidatus_Solibacter	Polypodiopsida	Rosales	Urticaceae	Mycetia
bASV71	09c37e859ef312ed056e8862edde110b	Bacteria	0.00874002	-1668.94	-1669.01	0.715171	1	bASV71|Comamonadaceae	Gammaproteobacteria	Burkholderiales	Comamonadaceae		NA	Asparagales	Asparagaceae	Pterospermum
bASV173	61083f27c1d53eb552dd8a38d2764fb5	Bacteria	7.33137e-05	-1676.7	-1676.69	1	1	bASV173|Sphingomonas	Alphaproteobacteria	Sphingomonadales	Sphingomonadaceae	Sphingomonas	NA	Myrtales	NA	Fagraea
bASV2653	b7194b721e9f41c97194a9a5ee4fb4ba	Bacteria	0.0211681	-1674.74	-1674.96	0.509155	0.924807	bASV2653|Afipia	Alphaproteobacteria	Rhizobiales	Xanthobacteraceae	Afipia	NA	NA	Araliaceae	Brassaiopsis
bASV379	7dad82073654c0f0b140ca86aa4f9e33	Bacteria	0.0392416	-1806.53	-1807.57	0.149373	0.41922	bASV379|Mesorhizobium	Alphaproteobacteria	Rhizobiales	Rhizobiaceae	Mesorhizobium	NA	Rosales	Araceae	NA
bASV864	b05c2075588aea63a31e65ddd3c44216	Bacteria	7.33137e-05	-1720.58	-1720.57	1	1	bASV864|uncultured_Polyangiaceae	Polyangia	Polyangiales	Phaselicystidaceae	Phaselicystis	NA	NA	Meliaceae	Musa
bASV3506	16514c759c2019c41f4214904b2934a6	Bacteria	0.182862	-1725.56	-1730.99	0.000989643	0.0225386	bASV3506|metagenome	Alphaproteobacteria	Rhizobiales			NA	Lamiales	Lamiaceae	Fagraea
bASV942	99b1abc2ebada84ef3ab253e883b5453	Bacteria	7.33137e-05	-1776.97	-1776.97	1	1	bASV942|Flavobacterium	Bacteroidia	Flavobacteriales	Flavobacteriaceae	Flavobacterium	NA	Rosales	Urticaceae	Alocasia
bASV519	5ede7c81e5d2ce91092375e8353f5129	Bacteria	0.0269976	-1788.23	-1789.05	0.201278	0.502599	bASV519|Paenibacillus	Bacilli	Paenibacillales	Paenibacillaceae	Paenibacillus	NA	Arecales	Acanthaceae	Alocasia
bASV456	40c699f4021d13fb81e88e1dc31eb86d	Bacteria	0.0407276	-1774.23	-1774.85	0.263867	0.592296	bASV456|Steroidobacteraceae	Gammaproteobacteria	Steroidobacterales	Steroidobacteraceae		NA	Arecales	Urticaceae	Mycetia
bASV567	720de670776bd8180f6521ae00dd721e	Bacteria	7.33137e-05	-1796.68	-1796.68	1	1	bASV567|uncultured_bacterium	Dehalococcoidia	S085	S085	S085	NA	Arecales	Arecaceae	Mycetia
bASV315	e1cb824d13a46eae3b5563ab6c1ae12b	Bacteria	0.0126862	-1793.31	-1793.43	0.618747	1	bASV315|Xanthobacteraceae	Alphaproteobacteria	Rhizobiales	Xanthobacteraceae		NA	Rosales	Urticaceae	Alocasia
bASV4000	cbe185bab645829c1b679da14fa31f46	Bacteria	7.33137e-05	-1628.13	-1628.13	1	1	bASV4000|Friedmanniella	Actinobacteria	Propionibacteriales	Propionibacteriaceae	Friedmanniella	NA	NA	NA	Prunus
bASV160	dda4c062d62ff51096f9bd2230cb26eb	Bacteria	0.0345903	-1771.76	-1771.87	0.644139	1	bASV160|Streptomyces	Actinobacteria	Streptomycetales	Streptomycetaceae	Streptomyces	NA	NA	Acanthaceae	Bauhinia
bASV3454	f7754781675e981e74210f2130878204	Bacteria	0.10165	-1699.6	-1699.35	1	1	bASV3454|Gemmatimonas	Gemmatimonadetes	Gemmatimonadales	Gemmatimonadaceae	Gemmatimonas	NA	NA	Urticaceae	Lagerstroemia
bASV4466	85746f0a4a36e99965748da2b6ff86ac	Bacteria	7.33137e-05	-1639.46	-1639.45	1	1	bASV4466|uncultured_bacterium	Verrucomicrobiae	Pedosphaerales	Pedosphaeraceae	Pedosphaeraceae	NA	NA	Apocynaceae	Caryota
bASV1645	a6003f96d74637a47a0237046959a121	Bacteria	0.251808	-1681.57	-1683.76	0.0362662	0.174735	bASV1645|uncultured_bacterium	Actinobacteria	Frankiales	Acidothermaceae	Acidothermus	Pinopsida	Malvales	Poaceae	Horsfieldia
bASV5306	0cd9bd25dc9a81c406dccdd05a108475	Bacteria	0.00545573	-1640.5	-1640.54	0.780135	1	bASV5306|0319-6G20	Oligoflexia	0319-6G20	0319-6G20	0319-6G20	NA	NA	NA	Pandanus
bASV452	4bf8e5965cafa110fb20044adaa9fb6b	Bacteria	0.164119	-1741.18	-1744.47	0.010318	0.0842749	bASV452|uncultured_bacterium	Subgroup_5	Subgroup_5	Subgroup_5	Subgroup_5	NA	NA	Urticaceae	NA
bASV640	a8e2dd15c00a82adbdbcff3bd12ea4df	Bacteria	0.0499504	-1770.05	-1770.27	0.508219	0.923769	bASV640|uncultured_bacterium	Alphaproteobacteria	Rhizobiales	Xanthobacteraceae	Xanthobacteraceae	NA	NA	Myrtaceae	Alocasia
bASV1450	56ffeb53319b970dd250e83742562528	Bacteria	7.33137e-05	-1716.88	-1716.88	1	1	bASV1450|Saprospiraceae	Bacteroidia	Chitinophagales	Saprospiraceae		NA	Myrtales	Myrtaceae	Alocasia
bASV2895	860eeaa0d2518f6e987bfb0abb7f40a8	Bacteria	0.086595	-1643.87	-1648.04	0.00388206	0.0469037	bASV2895|Paenibacillus_xylanexedens	Bacilli	Paenibacillales	Paenibacillaceae	Paenibacillus	NA	Arecales	Acanthaceae	Brassaiopsis
bASV1418	052da2188f91a5a18befe41063ff2b2b	Bacteria	0.0161117	-1665.59	-1665.85	0.471344	0.877143	bASV1418|Roseiflexaceae	Chloroflexia	Chloroflexales	Roseiflexaceae		NA	Asparagales	Apocynaceae	Fagraea
bASV918	754c34703817bd5b04cadeb9023cd36c	Bacteria	7.33137e-05	-1768.16	-1768.16	1	1	bASV918|Catenulispora	Actinobacteria	Catenulisporales	Catenulisporaceae	Catenulispora	Liliopsida	Others	Poaceae	Musa
bASV386	27866e5d36057a28fc24f63a3fb2afd3	Bacteria	0.0893605	-1771.13	-1774.56	0.00882027	0.0772766	bASV386|Xanthobacteraceae	Alphaproteobacteria	Rhizobiales	Xanthobacteraceae		Magnoliopsida	Rosales	Urticaceae	Alocasia
bASV4026	e6b29eb3b678dc712d0cc5bffa6715ee	Bacteria	7.33137e-05	-1673.77	-1673.77	1	1	bASV4026|MB-A2-108	MB-A2-108	MB-A2-108	MB-A2-108	MB-A2-108	NA	NA	Acanthaceae	Alocasia
bASV2630	83621b8e1b8662dcc7527d447b85bc21	Bacteria	0.0308152	-1688.48	-1690.04	0.076953	0.275205	bASV2630|uncultured_Xanthomonadaceae	Gammaproteobacteria	Xanthomonadales	Rhodanobacteraceae	Rhodanobacter	NA	Arecales	Urticaceae	Begonia
bASV2317	68d39b754f4e3ed915c555d59aa94118	Bacteria	0.458383	-1687.24	-1698.28	2.5991e-06	0.000506225	bASV2317|Kineosporiaceae	Actinobacteria	Kineosporiales	Kineosporiaceae		NA	Lamiales	Acanthaceae	Mycetia
bASV4649	bfc16281c5ecc19dc2cd08cd81aeda6d	Bacteria	7.33137e-05	-1605.94	-1605.94	1	1	bASV4649|Pseudomonas	Gammaproteobacteria	Pseudomonadales	Pseudomonadaceae	Pseudomonas	NA	NA	NA	NA
bASV3751	10602eb58094758efe5c47f618a0920a	Bacteria	0.100571	-1715.56	-1716.94	0.0968241	0.32005	bASV3751|Acidimicrobiia	Acidimicrobiia				NA	Asparagales	Lamiaceae	Mycetia
bASV1747	e3636c577aba2ddb7d38c1d6eb4ba81a	Bacteria	7.33137e-05	-1707.31	-1707.31	1	1	bASV1747|A21b	Gammaproteobacteria	Burkholderiales	A21b	A21b	NA	Arecales	Poaceae	Lagerstroemia
bASV765	a26be7c6ae8dbe66755ad242202469c7	Bacteria	0.0897652	-1762.81	-1771.1	4.67346e-05	0.0039444	bASV765|Novosphingobium	Alphaproteobacteria	Sphingomonadales	Sphingomonadaceae	Novosphingobium	NA	Lamiales	Acanthaceae	Fagraea
bASV2367	0fa67b01aea04f3261370194e694b48a	Bacteria	7.33137e-05	-1701.61	-1701.61	1	1	bASV2367|1921-3	Ktedonobacteria	Ktedonobacterales	Ktedonobacteraceae	1921-03-01	Polypodiopsida	Arecales	Poaceae	Horsfieldia
bASV805	407de910c19657752668c42beb80a363	Bacteria	0.00183859	-1664.21	-1664.23	0.866576	1	bASV805|Chryseobacterium	Bacteroidia	Flavobacteriales	Weeksellaceae	Chryseobacterium	NA	NA	NA	Brassaiopsis
bASV1891	cd11bf0a7c8920119dea878ec9e98468	Bacteria	0.0256034	-1719.31	-1719.86	0.291827	0.63263	bASV1891|Myxococcaceae	Myxococcia	Myxococcales	Myxococcaceae		NA	Arecales	Arecaceae	Fagraea
bASV1238	c4e6b504910dc713acbcb3abc53450f2	Bacteria	0.0286337	-1766.39	-1767.08	0.239679	0.559324	bASV1238|metagenome	Alphaproteobacteria	Sphingomonadales	Sphingomonadaceae	Altererythrobacter	NA	Rosales	Myrtaceae	Alocasia
bASV2426	966acd8ba6f91054f476875ecaa19887	Bacteria	0.141273	-1662.31	-1663.79	0.0858494	0.29494	bASV2426|uncultured_Chloroflexi	Chloroflexia	Chloroflexales	Roseiflexaceae		NA	NA	Myrtaceae	Fagraea
bASV1397	edf72eae2bca9a3e00dcc7f6b1510339	Bacteria	0.0587832	-1754.13	-1756.12	0.0457877	0.19784	bASV1397|uncultured_bacterium	Subgroup_5	Subgroup_5	Subgroup_5	Subgroup_5	NA	Sapindales	Urticaceae	NA
bASV551	98df5faa564bdbf577a9ef0a2c98b866	Bacteria	0.154333	-1762.06	-1762.41	0.398518	0.787088	bASV551|uncultured_bacterium	Acidobacteriae	Acidobacteriales	Acidobacteriaceae_(Subgroup_1)	Terracidiphilus	Others	Malvales	Poaceae	Lagerstroemia
bASV1862	2e4d3c92e1376c7185af156473ed295f	Bacteria	7.33137e-05	-1698.18	-1698.18	1	1	bASV1862|uncultured_bacterium	Gammaproteobacteria	Gammaproteobacteria	Gammaproteobacteria	Gammaproteobacteria	NA	Arecales	Arecaceae	Fagraea
bASV46	b9549b4a3e45e09646232af9c6ec9c18	Bacteria	7.33137e-05	-1755.74	-1755.74	1	1	bASV46|Xanthobacteraceae	Alphaproteobacteria	Rhizobiales	Xanthobacteraceae		NA	NA	Urticaceae	Musa
bASV1087	ed1ed820fb2bc1fea9d8c4bae5b9b7af	Bacteria	0.210586	-1777.24	-1781.45	0.00372565	0.0464697	bASV1087|Alphaproteobacteria	Alphaproteobacteria				NA	Asparagales	Urticaceae	Musa
bASV1864	aaf11494c98ebd05369f63a02ff6a26b	Bacteria	0.0120795	-1734.95	-1735.15	0.526536	0.942183	bASV1864|Reyranella	Alphaproteobacteria	Reyranellales	Reyranellaceae	Reyranella	NA	NA	Arecaceae	Alocasia
bASV1370	8bf8d2144e76fb9be4494231034172f9	Bacteria	0.184233	-1775.61	-1778.31	0.0202198	0.127255	bASV1370|metagenome	Thermoleophilia	Gaiellales			Polypodiopsida	Lamiales	Urticaceae	Mycetia
bASV511	3886602b65165d5c0671ff389860507d	Bacteria	0.0134979	-1756.05	-1756.32	0.460659	0.87109	bASV511|Brevundimonas	Alphaproteobacteria	Caulobacterales	Caulobacteraceae	Brevundimonas	NA	Asparagales	Acanthaceae	Mycetia
bASV5498	9df318d541d9ffb64f6d9dee34d8c503	Bacteria	0.0337744	-1642.95	-1642.98	0.814302	1	bASV5498|uncultured_bacterium	Bdellovibrionia	Bdellovibrionales	Bdellovibrionaceae	Bdellovibrio	NA	NA	Acanthaceae	NA
bASV2732	2ee0dc4d809b684fbd3369d512629ed1	Bacteria	0.0618441	-1676.25	-1678.33	0.0413674	0.186706	bASV2732|Frankiales	Actinobacteria	Frankiales			Pinopsida	Arecales	Poaceae	NA
bASV151	48e6ba4b2069ece2203d837c8b7ec851	Bacteria	0.107267	-1815.82	-1819.06	0.0110188	0.0870241	bASV151|uncultured_forest	Alphaproteobacteria	Rhizobiales	Xanthobacteraceae		NA	Others	Lamiaceae	Horsfieldia
bASV480	ddf3776a2f31d7bcbb0cf855642e7072	Bacteria	0.09285	-1764.06	-1766.61	0.0238941	0.1394	bASV480|Bacillus_litoralis	Bacilli	Bacillales	Bacillaceae	Bacillus	NA	NA	Urticaceae	Brassaiopsis
bASV1086	ce997233787be17800d22987888c4cc9	Bacteria	0.00468291	-1756.3	-1756.31	0.903502	1	bASV1086|Gaiellales	Thermoleophilia	Gaiellales			NA	Gentianales	Araceae	Alocasia
bASV859	81e2b1b8317a529b707af67c51083e32	Bacteria	0.0450713	-1743.24	-1745.47	0.0345627	0.171337	bASV859|Ellin6067	Gammaproteobacteria	Burkholderiales	Nitrosomonadaceae	Ellin6067	NA	Arecales	Phyllanthaceae	Fagraea
bASV2486	78dd1e1e617b0752d914bbc3f8263e7a	Bacteria	0.0669276	-1686.99	-1689.85	0.0166772	0.113818	bASV2486|Pseudonocardia	Actinobacteria	Pseudonocardiales	Pseudonocardiaceae	Pseudonocardia	NA	Arecales	Myrtaceae	Prunus
bASV894	ee0c0fe3498f1e7dc59ab71a3494dacd	Bacteria	7.33137e-05	-1694.3	-1694.3	1	1	bASV894|Conexibacter	Thermoleophilia	Solirubrobacterales	Solirubrobacteraceae	Conexibacter	NA	Others	Poaceae	Horsfieldia
bASV1856	0688b4c9c73f87610ecabe9210ba0de2	Bacteria	0.00267996	-1713.43	-1713.44	0.908165	1	bASV1856|Candidatus_Solibacter	Acidobacteriae	Solibacterales	Solibacteraceae	Candidatus_Solibacter	NA	NA	Poaceae	Lagerstroemia
bASV2272	2c38b6426c3240469698b4dc7625fb24	Bacteria	0.267081	-1729.14	-1732.27	0.0124465	0.0932386	bASV2272|Paenibacillus_glycanilyticus	Bacilli	Paenibacillales	Paenibacillaceae	Paenibacillus	Polypodiopsida	NA	Urticaceae	Begonia
bASV1045	8d2261a007f77562b4985933e6825588	Bacteria	0.435209	-1706.5	-1721.48	4.40517e-08	2.78847e-05	bASV1045|Rhizobium_tibeticum	Alphaproteobacteria	Rhizobiales	Rhizobiaceae	Allorhizobium-Neorhizobium-Pararhizobium-Rhizobium	NA	Lamiales	Urticaceae	Mycetia
bASV149	0a4b9ccfddd6ecaa0d8d8b692d6722a2	Bacteria	0.220212	-1838.7	-1844.37	0.000759865	0.0199606	bASV149|Rhodoplanes	Alphaproteobacteria	Rhizobiales	Xanthobacteraceae	Rhodoplanes	Polypodiopsida	Sapindales	Meliaceae	Mycetia
bASV563	c25cb6505525c288007f8f56ba2bbe70	Bacteria	0.0715306	-1743.16	-1745.68	0.0247843	0.142299	bASV563|uncultured_Chloroflexi	TK10	TK10	TK10	TK10	NA	Lamiales	Acanthaceae	Fagraea
bASV398	b13b54cee67a893f7360acb4e7fb63b8	Bacteria	0.0106443	-1684.85	-1685.26	0.365108	0.738381	bASV398|Enterococcus	Bacilli	Lactobacillales	Enterococcaceae	Enterococcus	NA	NA	Acanthaceae	Pandanus
bASV1242	bb95d8a77258258138cb1ac45373983f	Bacteria	0.0558203	-1750.33	-1750.61	0.453138	0.861065	bASV1242|uncultured_soil	Thermoleophilia	Gaiellales			NA	NA	Arecaceae	Fagraea
bASV1042	e7c335c4c86fd77b547665abc7ffe5d1	Bacteria	0.0931293	-1757.75	-1758.21	0.335042	0.700517	bASV1042|Paenibacillus	Bacilli	Paenibacillales	Paenibacillaceae	Paenibacillus	NA	NA	Acanthaceae	Alocasia
bASV2109	6d2fd1046b24917e9edfbc9608f06289	Bacteria	0.0296869	-1752.44	-1753.46	0.154805	0.428848	bASV2109|Paludibaculum	Acidobacteriae	Acidobacteriae	Acidobacteriae	Paludibaculum	NA	Arecales	Myrtaceae	Fagraea
bASV518	ce3fd5038fdac4c9c0d015bc70c7fab3	Bacteria	0.00116899	-1671.64	-1671.65	0.915442	1	bASV518|Sphingobacterium	Bacteroidia	Sphingobacteriales	Sphingobacteriaceae	Sphingobacterium	NA	NA	NA	Rhaphidophora
bASV1291	faa2a27a85212c3cc635fc646048ee07	Bacteria	0.0145898	-1752.27	-1752.44	0.562995	0.988559	bASV1291|uncultured_Solirubrobacter	Thermoleophilia	Gaiellales			NA	Asparagales	Lamiaceae	Musa
bASV285	beef51ca9dbb5b8ab278b29690dc069e	Bacteria	0.0554729	-1698.24	-1700.42	0.036704	0.175117	bASV285|Micromonosporaceae	Actinobacteria	Micromonosporales	Micromonosporaceae		NA	Rosales	Acanthaceae	Mycetia
bASV362	ea34b2dd6a6c6ff408a1b17652a7e96d	Bacteria	0.0325343	-1763.7	-1764.73	0.152029	0.423008	bASV362|Microbacterium	Actinobacteria	Micrococcales	Microbacteriaceae	Microbacterium	NA	Lamiales	Acanthaceae	Alocasia
bASV873	095457792251154cf72f6a0b15dbf7bc	Bacteria	0.0510558	-1784.49	-1786.71	0.0351348	0.172229	bASV873|Microtrichales	Acidimicrobiia	Microtrichales			NA	Rosales	Myrtaceae	Alocasia
bASV970	cf010f8d2e29fafec8e21383b1826f80	Bacteria	0.0556639	-1739.33	-1740.58	0.113545	0.354058	bASV970|SC-I-84	Gammaproteobacteria	Burkholderiales	SC-I-84	SC-I-84	NA	Myrtales	Myrtaceae	Bauhinia
bASV1889	a51b668ded91f3bca620c61e2e017721	Bacteria	7.33137e-05	-1697.2	-1697.2	1	1	bASV1889|MND1	Gammaproteobacteria	Burkholderiales	Nitrosomonadaceae	MND1	NA	Arecales	Phyllanthaceae	Codiaeum
bASV5315	5d9d4ad5c2072041dc15966c51b93871	Bacteria	0.00921077	-1642.24	-1642.29	0.756911	1	bASV5315|uncultured_bacterium	Phycisphaerae	mle1-8	mle1-8	mle1-8	Polypodiopsida	Arecales	Araceae	Dypsis
bASV1234	eeb2ebd14d4f3b5baf1cc6e7e2cb3ea8	Bacteria	0.261924	-1712.89	-1717.42	0.00259586	0.0369254	bASV1234|Nocardioides	Actinobacteria	Propionibacteriales	Nocardioidaceae	Nocardioides	NA	NA	Meliaceae	Alocasia
bASV1330	23f50b83385d1418d8fddb146372d526	Bacteria	7.33137e-05	-1766.59	-1766.58	1	1	bASV1330|uncultured_bacterium	Actinobacteria	Frankiales	Sporichthyaceae		NA	Sapindales	Lamiaceae	NA
bASV463	c2379f2a007b0b06c1a5710958f4ba16	Bacteria	0.0488107	-1812.98	-1813.75	0.215097	0.518197	bASV463|Ilumatobacteraceae	Acidimicrobiia	Microtrichales	Ilumatobacteraceae		NA	Myrtales	Myrtaceae	Alocasia
bASV2250	101cc0a5b570488bf5e379c09c65c7fd	Bacteria	7.33137e-05	-1641.04	-1641.04	1	1	bASV2250|Terribacillus_goriensis	Bacilli	Bacillales	Bacillaceae	Terribacillus	NA	Arecales	Asteraceae	Brassaiopsis
bASV1848	f02b4f86e65dcc5bc2cb07b042b91aa4	Bacteria	0.0696233	-1716.59	-1718.09	0.0827	0.288781	bASV1848|uncultured_Syntrophobacteraceae	MBNT15	MBNT15	MBNT15	MBNT15	NA	Rosales	Urticaceae	Mycetia
bASV3009	b0659fd1e47e460768c6e10bf57d5727	Bacteria	0.0373317	-1644.03	-1644.52	0.322355	0.679603	bASV3009|Micromonospora	Actinobacteria	Micromonosporales	Micromonosporaceae	Micromonospora	NA	Arecales	Poaceae	Fagraea
bASV1311	d878a6947914d979bbebb1a2f9defb54	Bacteria	7.33137e-05	-1745.2	-1745.19	1	1	bASV1311|RCP2-54	RCP2-54	RCP2-54	RCP2-54	RCP2-54	NA	Gentianales	Lamiaceae	Mycetia
bASV1957	2473eeef2f1c94f713fa1a90e72bcbb6	Bacteria	0.118605	-1747.12	-1751.3	0.00384865	0.0468499	bASV1957|Lysobacter	Gammaproteobacteria	Xanthomonadales	Xanthomonadaceae	Lysobacter	NA	Sapindales	Urticaceae	NA
bASV1033	1af34a64712963d89297d972cbdd168a	Bacteria	7.33137e-05	-1747.26	-1747.26	1	1	bASV1033|Acidobacteriales	Acidobacteriae	Acidobacteriales			Pinopsida	Malvales	Poaceae	Lagerstroemia
bASV384	a9da0efaa145343af71d7d7f2f0a0d2c	Bacteria	0.0979051	-1677	-1679.65	0.0214894	0.131403	bASV384|TRA3-20	Gammaproteobacteria	Burkholderiales	TRA3-20	TRA3-20	NA	Myrtales	Myrtaceae	Alocasia
bASV632	d505ee99da6c2bce35287ae513b1bb72	Bacteria	0.047179	-1802.61	-1803.83	0.117292	0.36066	bASV632|Xanthobacteraceae	Alphaproteobacteria	Rhizobiales	Xanthobacteraceae		NA	Rosales	Urticaceae	Alocasia
bASV1979	51b5927bc18b97adcf80a90a1fcd104f	Bacteria	7.33137e-05	-1696.46	-1696.46	1	1	bASV1979|uncultured_bacterium	Alphaproteobacteria	Caulobacterales	Hyphomonadaceae	Hirschia	NA	NA	Araceae	Alocasia
bASV327	5206ccd490edf874d7c0c68fc1cfbe0c	Bacteria	0.0217708	-1803.6	-1803.95	0.402766	0.791158	bASV327|Rhodomicrobium	Alphaproteobacteria	Rhizobiales	Rhodomicrobiaceae	Rhodomicrobium	Pinopsida	Arecales	Arecaceae	Dypsis
bASV1869	fe52c90c34465077d38e61ee1aea3f69	Bacteria	0.0314205	-1652.76	-1654.89	0.0386575	0.178289	bASV1869|Burkholderia-Caballeronia-Paraburkholderia	Gammaproteobacteria	Burkholderiales	Burkholderiaceae	Burkholderia-Caballeronia-Paraburkholderia	NA	Sapindales	NA	Musa
bASV422	a0aa48f5bb12c51bda299be1ef66a1b5	Bacteria	0.0559895	-1812.05	-1812.68	0.264505	0.593203	bASV422|Rhodoplanes	Alphaproteobacteria	Rhizobiales	Xanthobacteraceae	Rhodoplanes	NA	NA	Lamiaceae	Musa
bASV602	2369f36e443cbf73b967e8b7ff297e91	Bacteria	0.00489895	-1746.21	-1746.22	0.920584	1	bASV602|Xanthobacteraceae	Alphaproteobacteria	Rhizobiales	Xanthobacteraceae		NA	Arecales	Poaceae	Horsfieldia
bASV1623	2e7fc17aa3f96d82e5c79b73c72062e4	Bacteria	7.33137e-05	-1709.3	-1709.3	1	1	bASV1623|Xanthobacteraceae	Alphaproteobacteria	Rhizobiales	Xanthobacteraceae		Polypodiopsida	Others	NA	Musa
bASV303	fed0fa6c06cb1aa92ebd79203411acf0	Bacteria	7.33137e-05	-1768.55	-1768.54	1	1	bASV303|Ellin6067	Gammaproteobacteria	Burkholderiales	Nitrosomonadaceae	Ellin6067	NA	Rosales	Myrtaceae	Alocasia
bASV3158	56f7f4e65eb1cfa7804ad7f2e8f551e9	Bacteria	0.0684726	-1619.76	-1622.94	0.0116827	0.0896378	bASV3158|Intrasporangium	Actinobacteria	Micrococcales	Intrasporangiaceae	Intrasporangium	NA	Myrtales	Myrtaceae	Fagraea
bASV241	0dcf3c1540a082920cbb6fc5ef32668a	Bacteria	7.33137e-05	-1759.4	-1759.39	1	1	bASV241|Comamonadaceae	Gammaproteobacteria	Burkholderiales	Comamonadaceae		NA	Asparagales	Acanthaceae	Pterospermum
bASV3222	cc6ef90350bed022e2f2cfc2b54af594	Bacteria	0.0180286	-1672.14	-1672.46	0.423742	0.821527	bASV3222|Micromonosporaceae	Actinobacteria	Micromonosporales	Micromonosporaceae		NA	Arecales	Arecaceae	Fagraea
bASV1730	061b8be01f513ae4eed5f64446663ba0	Bacteria	0.0634701	-1678.88	-1681.55	0.0208721	0.129213	bASV1730|Ellin6067	Gammaproteobacteria	Burkholderiales	Nitrosomonadaceae	Ellin6067	NA	Arecales	Myrtaceae	Fagraea
bASV2091	c2e90e68285c7870438dc45a1b7f830d	Bacteria	0.0124006	-1690.64	-1691	0.39998	0.788133	bASV2091|uncultured_bacterium	Subgroup_5	Subgroup_5	Subgroup_5	Subgroup_5	NA	NA	NA	Fagraea
bASV1757	18d066b38eecb6f38d3c48cb3d5e1aaa	Bacteria	0.137374	-1740.91	-1745.77	0.00181735	0.0302732	bASV1757|Microvirga	Alphaproteobacteria	Rhizobiales	Beijerinckiaceae	Microvirga	NA	Arecales	Myrtaceae	Alocasia
bASV2042	e1b95948d45a61b803dae22149451c0e	Bacteria	0.0207364	-1727.34	-1727.86	0.309266	0.663611	bASV2042|uncultured_bacterium	Thermoanaerobaculia	Thermoanaerobaculales	Thermoanaerobaculaceae	Subgroup_10	NA	Rosales	Araceae	Alocasia
bASV1814	ff8556bcfec91a1631bc4774840c4d08	Bacteria	0.0285253	-1708	-1708.99	0.159636	0.437444	bASV1814|Clostridium_sensu_stricto_3	Clostridia	Clostridiales	Clostridiaceae	Clostridium_sensu_stricto_3	NA	NA	Acanthaceae	Alocasia
bASV952	be9812a278db8636ef953ee17edbeb80	Bacteria	0.00991124	-1791.03	-1791.09	0.731267	1	bASV952|SWB02	Alphaproteobacteria	Caulobacterales	Hyphomonadaceae	SWB02	Others	Rosales	Myrtaceae	Bauhinia
bASV1742	f3219ce1f4234e6d67fab2dfe5f0b769	Bacteria	7.33137e-05	-1706.86	-1706.85	1	1	bASV1742|Jatrophihabitans_sp.	Actinobacteria	Frankiales	Frankiaceae	Jatrophihabitans	Others	Others	Poaceae	Horsfieldia
bASV1927	cf550caa1c1c78baf479934034b065d8	Bacteria	0.0449878	-1718.56	-1719.32	0.217987	0.523664	bASV1927|uncultured_bacterium	Subgroup_5	Subgroup_5	Subgroup_5	Subgroup_5	Polypodiopsida	Arecales	Urticaceae	Dypsis
bASV4247	84b33695210a327cff70851658ad70e0	Bacteria	0.0705101	-1684.85	-1687.68	0.0171892	0.116372	bASV4247|uncultured_bacterium	Alphaproteobacteria	Rhizobiales	Xanthobacteraceae	Pseudorhodoplanes	NA	Lamiales	Lamiaceae	Alocasia
bASV118	7428e6470e1a21ba866f400499b0547a	Bacteria	0.219615	-1644.54	-1649.43	0.00176613	0.0302151	bASV118|Ilumatobacter	Acidimicrobiia	Microtrichales	Ilumatobacteraceae	Ilumatobacter	Magnoliopsida	Lamiales	Lamiaceae	Alocasia
bASV1490	b22567a9437cb61b01905b95de414641	Bacteria	7.33137e-05	-1747.31	-1747.31	1	1	bASV1490|Gaiellales	Thermoleophilia	Gaiellales			NA	Myrtales	Myrtaceae	Alocasia
bASV158	217e905a60e18f915c4a0880c3d88058	Bacteria	0.0268524	-1802.61	-1803.13	0.304889	0.655329	bASV158|Acidibacter	Gammaproteobacteria	Gammaproteobacteria_Incertae_Sedis	Unknown_Family	Acidibacter	NA	Malvales	Poaceae	Horsfieldia
bASV1168	fc39b0f0022c6c02631656d86be293c9	Bacteria	0.0192636	-1731.96	-1732.72	0.216473	0.520522	bASV1168|Ilumatobacteraceae	Acidimicrobiia	Microtrichales	Ilumatobacteraceae		NA	Rosales	Moraceae	Alocasia
bASV153	d2f5ecb25cfdf6929063923cddf34464	Bacteria	7.33137e-05	-1809.77	-1809.76	1	1	bASV153|Novosphingobium	Alphaproteobacteria	Sphingomonadales	Sphingomonadaceae	Novosphingobium	NA	NA	Urticaceae	NA
bASV1598	7b793d7bca088adb6719ba66607cf6df	Bacteria	7.33137e-05	-1697.91	-1697.91	1	1	bASV1598|Phenylobacterium	Alphaproteobacteria	Caulobacterales	Caulobacteraceae	Phenylobacterium	NA	Others	Araceae	Alocasia
bASV412	78945cdc071cb5a93756fd63dc3175e5	Bacteria	0.17921	-1767.19	-1770.82	0.00706302	0.0677408	bASV412|Lysobacter	Gammaproteobacteria	Xanthomonadales	Xanthomonadaceae	Lysobacter	NA	Rosales	Acanthaceae	Brassaiopsis
bASV1453	53a3a3ce01cefd821327f7baf3b858b4	Bacteria	0.00827339	-1751.09	-1751.16	0.692542	1	bASV1453|metagenome	Thermoleophilia	Solirubrobacterales	67-14	67-14	NA	Arecales	Acanthaceae	Alocasia
bASV2195	2b475fb827a6ee3bd657173a0d892b75	Bacteria	0.204197	-1677.56	-1681.45	0.00524564	0.0572498	bASV2195|Acidobacteriaceae_(Subgroup_1)	Acidobacteriae	Acidobacteriales	Acidobacteriaceae_(Subgroup_1)		NA	Malvales	Poaceae	Terminalia
bASV1874	8ae1e1a4c02257750b1f486813990011	Bacteria	0.138156	-1754.3	-1759.33	0.00150928	0.0278013	bASV1874|uncultured_bacterium	Acidobacteriae	Solibacterales	Solibacteraceae	Candidatus_Solibacter	Polypodiopsida	Others	Urticaceae	Musa
bASV2393	f93bbc57139055af972b088cdd206f57	Bacteria	0.0712432	-1722.59	-1724.56	0.0472775	0.202549	bASV2393|uncultured_delta	Polyangia	mle1-27	mle1-27	mle1-27	NA	Arecales	Arecaceae	Fagraea
bASV4934	541564861a9db838659834bc1c12befd	Bacteria	0.0590342	-1628.97	-1633.37	0.00301372	0.0408061	bASV4934|uncultured_bacterium	Acidobacteriae	Elev-16S-1166	Elev-16S-1166	Elev-16S-1166	NA	Myrtales	Araceae	Magnolia
bASV446	41b35f0e15743a5b86eaace871be8c9f	Bacteria	7.33137e-05	-1726.39	-1726.39	1	1	bASV446|Sphingobium	Alphaproteobacteria	Sphingomonadales	Sphingomonadaceae	Sphingobium	NA	NA	NA	NA
bASV7526	fea50db9c621077455a04f4dcd52e451	Bacteria	0.00442985	-1602.91	-1602.93	0.828694	1	bASV7526|Kineococcus	Actinobacteria	Kineosporiales	Kineosporiaceae	Kineococcus	NA	NA	NA	NA
bASV1267	e7798275e605ebdf8288abf9a1b91f61	Bacteria	5.67329e-05	-1748.67	-1748.67	1	1	bASV1267|Nocardioidaceae	Actinobacteria	Propionibacteriales	Nocardioidaceae		NA	Arecales	Arecaceae	Fagraea
bASV472	ba795a4b38811cff92c4ad57bbf9d283	Bacteria	0.192441	-1760.77	-1762.88	0.0399424	0.183547	bASV472|Nitrospira	Nitrospiria	Nitrospirales	Nitrospiraceae	Nitrospira	NA	Sapindales	Urticaceae	Brassaiopsis
bASV2479	f680acb74cd887f566b5867d9c996585	Bacteria	0.0343221	-1728.17	-1728.86	0.240033	0.559634	bASV2479|Nocardioides	Actinobacteria	Propionibacteriales	Nocardioidaceae	Nocardioides	NA	Rosales	Araceae	Alocasia
bASV3638	48c8d6c39ca90ca03dd9cfd052905c32	Bacteria	0.0100149	-1690.51	-1690.6	0.668292	1	bASV3638|Sandaracinaceae	Polyangia	Polyangiales	Sandaracinaceae		NA	Arecales	Arecaceae	Alocasia
bASV247	a7113986bfb98dfaaf9747df492313d8	Bacteria	0.253437	-1769.76	-1772.12	0.0300217	0.158603	bASV247|Burkholderia-Caballeronia-Paraburkholderia	Gammaproteobacteria	Burkholderiales	Burkholderiaceae	Burkholderia-Caballeronia-Paraburkholderia	Pinopsida	Others	Poaceae	Musa
bASV4491	20d093b3e855c0d75ca7700605fe0e80	Bacteria	0.101787	-1620.1	-1626.11	0.000528215	0.0157346	bASV4491|Paenibacillus	Bacilli	Paenibacillales	Paenibacillaceae	Paenibacillus	NA	Arecales	Urticaceae	NA
bASV2099	d913868ff6acb3d346a58fd9465d39f3	Bacteria	7.33137e-05	-1732.8	-1732.79	1	1	bASV2099|Elsterales	Alphaproteobacteria	Elsterales			NA	Others	Lauraceae	Musa
bASV1109	8aca35fc8b4f4e73ae60e04eca846f2b	Bacteria	0.0219343	-1751.63	-1751.79	0.576286	1	bASV1109|uncultured_bacterium	Verrucomicrobiae	Pedosphaerales	Pedosphaeraceae	Pedosphaera	NA	Malvales	NA	Horsfieldia
bASV98	35913bb8a5648755a94af5c8f21b385a	Bacteria	7.33137e-05	-1770.05	-1770.05	1	1	bASV98|Methylophilaceae	Gammaproteobacteria	Burkholderiales	Methylophilaceae		NA	NA	NA	Alocasia
bASV47	2186581162544a7f65ef34ed4de73070	Bacteria	0.150045	-1740.62	-1743.36	0.0193652	0.12382	bASV47|Gaiella	Thermoleophilia	Gaiellales	Gaiellaceae	Gaiella	Magnoliopsida	Lamiales	Myrtaceae	Fagraea
bASV490	75712e1b250896d440502a0e26f1fb37	Bacteria	7.33137e-05	-1799.99	-1799.99	1	1	bASV490|Microtrichales	Acidimicrobiia	Microtrichales			NA	Rosales	Lamiaceae	NA
bASV290	f9c3deb29cb93c6d3bfe1f0897562123	Bacteria	7.33137e-05	-1787.38	-1787.38	1	1	bASV290|Micrococcaceae	Actinobacteria	Micrococcales	Micrococcaceae		Polypodiopsida	Others	Poaceae	Horsfieldia
bASV1225	ed8c94c412a82f7bd73c89413cf15cce	Bacteria	0.154869	-1710.9	-1715.32	0.00294138	0.0405923	bASV1225|Mycobacterium	Actinobacteria	Corynebacteriales	Mycobacteriaceae	Mycobacterium	NA	NA	Urticaceae	Begonia
bASV1138	84e75e5c3c8b8f02cfd573d6d4e23d25	Bacteria	0.101267	-1761.84	-1763.89	0.0429691	0.191546	bASV1138|Microtrichales	Acidimicrobiia	Microtrichales			Liliopsida	Arecales	Lamiaceae	Musa
bASV1424	19cb650c813d23d4411bfa93fd97a705	Bacteria	7.33137e-05	-1666.15	-1666.15	1	1	bASV1424|Comamonadaceae	Gammaproteobacteria	Burkholderiales	Comamonadaceae		NA	Arecales	Arecaceae	Fagraea
bASV3006	a7443f7520dfd7149de33d89e3da624b	Bacteria	0.0382883	-1725.84	-1727.44	0.0732034	0.266309	bASV3006|Unknown_Family	Gammaproteobacteria	Gammaproteobacteria_Incertae_Sedis	Unknown_Family		NA	NA	Myrtaceae	Alocasia
bASV1182	351c11b0ee2ebfeb63f5aa5d8bcbf599	Bacteria	7.33137e-05	-1755.69	-1755.69	1	1	bASV1182|uncultured_Alphaproteobacteria	Alphaproteobacteria	Micropepsales	Micropepsaceae		Polypodiopsida	NA	Urticaceae	Pterospermum
bASV816	929e52b3386645cb9857a243ebcb2a54	Bacteria	0.0240241	-1788.74	-1788.95	0.518058	0.934942	bASV816|Gemmatimonadaceae	Gemmatimonadetes	Gemmatimonadales	Gemmatimonadaceae		NA	Rosales	Myrtaceae	Alocasia
bASV2734	f9e585458e7fa24818db9fe38b811de4	Bacteria	0.0605278	-1697.13	-1699.77	0.0215894	0.131403	bASV2734|uncultured_Acidobacteria	Acidobacteriae	Subgroup_13	Subgroup_13	Subgroup_13	NA	Arecales	Myrtaceae	Dypsis
bASV773	79221349184cd90d524cf52f9493a34f	Bacteria	7.33137e-05	-1786.98	-1786.98	1	1	bASV773|mle1-7	Gammaproteobacteria	Burkholderiales	Nitrosomonadaceae	mle1-7	NA	NA	Urticaceae	Lagerstroemia
bASV2127	29ee9e5c5c244ed8e77aef0904fd5a53	Bacteria	0.0224043	-1730.77	-1731.25	0.331658	0.69574	bASV2127|Iamia	Acidimicrobiia	Microtrichales	Iamiaceae	Iamia	NA	Rosales	Acanthaceae	Fagraea
bASV4014	d5e92b68708218b8d23321284ec8414f	Bacteria	7.33137e-05	-1626.88	-1626.88	1	1	bASV4014|metagenome	Acidimicrobiia	Microtrichales	Ilumatobacteraceae	CL500-29_marine_group	NA	NA	Acanthaceae	NA
bASV967	31b9709a39fc0ee755878e2a56037568	Bacteria	7.33137e-05	-1776.27	-1776.26	1	1	bASV967|uncultured_bacterium	Thermoleophilia	Solirubrobacterales	67-14	67-14	NA	NA	Urticaceae	Horsfieldia
bASV4154	60e8c857c0562c2929cc8e68877aec52	Bacteria	0.0743268	-1583.21	-1583.89	0.245247	0.566574	bASV4154|uncultured_bacterium	Actinobacteria	Pseudonocardiales	Pseudonocardiaceae	Pseudonocardia	Polypodiopsida	NA	NA	Prunus
bASV2716	b9e971b0bdd62665b1459c4a4b95310d	Bacteria	0.0402382	-1693.55	-1694.32	0.21449	0.518174	bASV2716|uncultured_bacterium	JG30-KF-CM66	JG30-KF-CM66	JG30-KF-CM66	JG30-KF-CM66	NA	Malvales	Myrtaceae	Bauhinia
bASV1332	709df1ce16ee673568127156c2f8f3b3	Bacteria	0.136777	-1752.68	-1754.44	0.0609301	0.239029	bASV1332|MB-A2-108	MB-A2-108	MB-A2-108	MB-A2-108	MB-A2-108	NA	Lamiales	Meliaceae	Musa
bASV1301	39eec1132169088279bc60709de116c3	Bacteria	0.132694	-1751.67	-1756.21	0.00256738	0.0367266	bASV1301|Ellin6067	Gammaproteobacteria	Burkholderiales	Nitrosomonadaceae	Ellin6067	NA	Myrtales	Myrtaceae	Fagraea
bASV421	0fb763f100bf86103e474adaafbfd1ed	Bacteria	0.0392736	-1764.09	-1769.51	0.00099697	0.0225386	bASV421|Allorhizobium-Neorhizobium-Pararhizobium-Rhizobium	Alphaproteobacteria	Rhizobiales	Rhizobiaceae	Allorhizobium-Neorhizobium-Pararhizobium-Rhizobium	NA	NA	Asteraceae	Brassaiopsis
bASV1333	502206c2fbd81d01365b90c395a59d76	Bacteria	7.33137e-05	-1743.37	-1743.36	1	1	bASV1333|uncultured_bacterium	Alphaproteobacteria	Rhizobiales	Rhizobiales_Incertae_Sedis	Nordella	NA	Arecales	Acanthaceae	Pandanus
bASV1443	cdfb1782927f5516757ad632863dd998	Bacteria	0.00534918	-1721.08	-1721.17	0.671453	1	bASV1443|Devosia_riboflavina	Alphaproteobacteria	Rhizobiales	Devosiaceae	Devosia	NA	NA	NA	Brassaiopsis
bASV6924	1859cfc3039935ded69c3dc5d4721ac0	Bacteria	7.33137e-05	-1597.05	-1597.04	1	1	bASV6924|0319-6G20	Oligoflexia	0319-6G20	0319-6G20	0319-6G20	NA	NA	Araceae	Pandanus
bASV2039	fb9b3bf066070c58df2ff76bc204bf85	Bacteria	7.33137e-05	-1668.48	-1668.48	1	1	bASV2039|Solirubrobacter_sp.	Thermoleophilia	Solirubrobacterales	Solirubrobacteraceae	Solirubrobacter	NA	NA	Arecaceae	Fagraea
bASV467	9dd3af2559f63d709533cde15bfaa397	Bacteria	0.00486855	-1812.32	-1812.33	0.900397	1	bASV467|Xanthobacteraceae	Alphaproteobacteria	Rhizobiales	Xanthobacteraceae		NA	Arecales	Meliaceae	Alocasia
bASV275	01fdba46caec8f22a5c93c5f931d2ee2	Bacteria	0.0150249	-1633.28	-1633.5	0.50751	0.923144	bASV275|Ilumatobacteraceae	Acidimicrobiia	Microtrichales	Ilumatobacteraceae		NA	Lamiales	Lamiaceae	Alocasia
bASV2106	d6a1b50ae586bf64be6d19046824659a	Bacteria	0.0301319	-1645.17	-1645.91	0.223864	0.532655	bASV2106|Acidimicrobiia	Acidimicrobiia				Pinopsida	NA	Araceae	Podocarpus
bASV316	a18b5fd2f89d7fb4d5d35a205441d8c4	Bacteria	0.00676402	-1701.15	-1701.18	0.798356	1	bASV316|Intrasporangium	Actinobacteria	Micrococcales	Intrasporangiaceae	Intrasporangium	Pinopsida	Arecales	Apocynaceae	Fagraea
bASV5281	dd9003f91d8d95d582d1c67812f12756	Bacteria	0.0459484	-1611.08	-1612.78	0.0646672	0.246156	bASV5281|uncultured_bacterium	Subgroup_22	Subgroup_22	Subgroup_22	Subgroup_22	NA	Myrtales	Myrtaceae	NA
bASV1533	81015cbce5573cdc0ab0a8ae150a1793	Bacteria	0.0400202	-1755.48	-1755.97	0.318502	0.674851	bASV1533|Steroidobacteraceae	Gammaproteobacteria	Steroidobacterales	Steroidobacteraceae		NA	NA	Myrtaceae	Brassaiopsis
bASV8617	fc09d5bda8017e623a22f14b9e091f36	Bacteria	0.16259	-1617.8	-1619.74	0.0489651	0.206633	bASV8617|Pedosphaeraceae	Verrucomicrobiae	Pedosphaerales	Pedosphaeraceae		NA	Arecales	Araceae	Fagraea
bASV1921	2c3f6556bba65ff5d58dcaab32fb5f12	Bacteria	0.0108801	-1695.68	-1695.96	0.455332	0.864234	bASV1921|Gammaproteobacteria	Gammaproteobacteria				NA	NA	NA	NA
bASV5491	46d0ff51ec5a5a950b744802042a4116	Bacteria	7.33137e-05	-1653.47	-1653.46	1	1	bASV5491|Minicystis	Polyangia	Polyangiales	Polyangiaceae	Minicystis	NA	NA	NA	Alocasia
bASV895	a20d4dee703a40697cbe0dc16d16ccf0	Bacteria	7.33137e-05	-1740.55	-1740.55	1	1	bASV895|Gaiella	Thermoleophilia	Gaiellales	Gaiellaceae	Gaiella	NA	Arecales	Myrtaceae	Dypsis
bASV1100	9683aa4bcfebcbfbb6828f89dc064261	Bacteria	0.0619303	-1743.88	-1745.41	0.0805071	0.283117	bASV1100|Candidatus_Solibacter	Acidobacteriae	Solibacterales	Solibacteraceae	Candidatus_Solibacter	Others	Arecales	Zingiberaceae	Musa
bASV1384	0eb6b774a0446ba7eb7778bdb2572763	Bacteria	7.33137e-05	-1733.46	-1733.45	1	1	bASV1384|Microbacterium	Actinobacteria	Micrococcales	Microbacteriaceae	Microbacterium	NA	Arecales	NA	Terminalia
bASV2992	63be51e0d1dcd4270e10fb9502bbadf9	Bacteria	7.33137e-05	-1653.58	-1653.58	1	1	bASV2992|uncultured_bacterium	Alphaproteobacteria	Rhizobiales	Rhizobiales_Incertae_Sedis		NA	NA	Poaceae	Begonia
bASV949	4633c1d33e5b3cbe4f9b731e0d9c0df3	Bacteria	0.0599339	-1767.84	-1768.85	0.155291	0.429221	bASV949|uncultured_bacterium	Subgroup_5	Subgroup_5	Subgroup_5	Subgroup_5	NA	NA	Myrtaceae	Duranta
bASV3090	2356fa3a3e116010757c47552c52be8f	Bacteria	7.33137e-05	-1609.77	-1609.77	1	1	bASV3090|metagenome	Alphaproteobacteria	Rhizobiales	Rhizobiaceae	Allorhizobium-Neorhizobium-Pararhizobium-Rhizobium	NA	NA	NA	Fagraea
bASV1673	58b79adcc49e841afbd44af53497895f	Bacteria	0.00151699	-1628.95	-1628.96	0.876594	1	bASV1673|Microbacterium	Actinobacteria	Micrococcales	Microbacteriaceae	Microbacterium	NA	Arecales	Zingiberaceae	NA
bASV3770	a38e0ac5eae85129efdbdbc0b06fec9e	Bacteria	7.33137e-05	-1683.69	-1683.69	1	1	bASV3770|NS9_marine_group	Bacteroidia	Flavobacteriales	NS9_marine_group	NS9_marine_group	NA	NA	Myrtaceae	Alocasia
bASV508	cffce17da805f6702925d7007f1739f0	Bacteria	7.33137e-05	-1769.92	-1769.92	1	1	bASV508|Conexibacter	Thermoleophilia	Solirubrobacterales	Solirubrobacteraceae	Conexibacter	NA	Malvales	Poaceae	Horsfieldia
bASV228	c3e608650ca4be8687c6589f54002feb	Bacteria	0.0534395	-1804.17	-1806.95	0.0183457	0.12034	bASV228|uncultured_Acidobacteria	Acidobacteriae	Subgroup_2	Subgroup_2	Subgroup_2	NA	Arecales	Asparagaceae	Fagraea
bASV1319	a3589ed229b5b1274182d07a7243ea98	Bacteria	0.0135264	-1764.05	-1764.24	0.535015	0.952643	bASV1319|Adhaeribacter	Bacteroidia	Cytophagales	Hymenobacteraceae	Adhaeribacter	NA	Arecales	Myrtaceae	Fagraea
bASV3439	f368659d5a134576508b434bf54a67f1	Bacteria	7.33137e-05	-1622.37	-1622.36	1	1	bASV3439|uncultured_bacterium	Alphaproteobacteria	Micropepsales	Micropepsaceae		NA	NA	Poaceae	Begonia
bASV2324	2cebcf444dbc3a39d097f12132eb411e	Bacteria	0.0375512	-1722.74	-1724.08	0.101341	0.328547	bASV2324|Conexibacter	Thermoleophilia	Solirubrobacterales	Solirubrobacteraceae	Conexibacter	NA	Arecales	Arecaceae	Dypsis
bASV121	20cd751ee1b41d522a1662ac03a2ed70	Bacteria	0.109776	-1669.02	-1671.22	0.0362813	0.174735	bASV121|IMCC26256	Acidimicrobiia	IMCC26256	IMCC26256	IMCC26256	NA	Lamiales	Urticaceae	Clerodendrum
bASV2430	ef857cb807b8d47e34adc0d5b59e8048	Bacteria	0.135116	-1706.97	-1713.18	0.000422907	0.013385	bASV2430|NB1-j	NB1-j	NB1-j	NB1-j	NB1-j	NA	Arecales	Myrtaceae	Dypsis
bASV214	79d83cc0d5fe842747fedd48494e6dd1	Bacteria	0.0846007	-1769.32	-1773.74	0.00293117	0.0405923	bASV214|Micropepsaceae	Alphaproteobacteria	Micropepsales	Micropepsaceae		NA	NA	Poaceae	Excoecaria
bASV957	1a7e4960b1ad4d62642a85e007cfbb13	Bacteria	0.142992	-1783.83	-1787.32	0.00820057	0.0744224	bASV957|Paenibacillus	Bacilli	Paenibacillales	Paenibacillaceae	Paenibacillus	NA	Arecales	Acanthaceae	Brassaiopsis
bASV1498	684a3ebce87da4f05343f0e04ea6868c	Bacteria	0.0639013	-1730.18	-1731.25	0.144063	0.410775	bASV1498|Peredibacter	Bdellovibrionia	Bacteriovoracales	Bacteriovoracaceae	Peredibacter	NA	NA	Myrtaceae	Alocasia
bASV549	65fad168b43861213a636904841cc018	Bacteria	7.33137e-05	-1772.07	-1772.07	1	1	bASV549|Acidothermus	Actinobacteria	Frankiales	Acidothermaceae	Acidothermus	Pinopsida	NA	NA	Horsfieldia
bASV809	ecf053160ec7415f3bd43b8915d4fd56	Bacteria	0.299806	-1729.11	-1731.92	0.0178037	0.118318	bASV809|uncultured_forest	Alphaproteobacteria	Rhizobiales	Xanthobacteraceae		NA	Myrtales	Poaceae	Horsfieldia
bASV1908	1b7a4e82640e307db895af8baa36199f	Bacteria	0.0394123	-1748.74	-1749.51	0.215028	0.518197	bASV1908|uncultured_gamma	Gammaproteobacteria	JG36-GS-52	JG36-GS-52	JG36-GS-52	NA	Myrtales	Myrtaceae	Alocasia
bASV875	077bda7e429a9c43d9e4cc93f78b8a3f	Bacteria	7.33137e-05	-1772.81	-1772.8	1	1	bASV875|Ellin516	Verrucomicrobiae	Pedosphaerales	Pedosphaeraceae	Ellin516	NA	Malvales	Poaceae	Horsfieldia
bASV1690	246c9bbe2d1fba774042f888293f110e	Bacteria	0.0181082	-1751.42	-1751.45	0.786417	1	bASV1690|Afipia	Alphaproteobacteria	Rhizobiales	Xanthobacteraceae	Afipia	NA	NA	Urticaceae	Mycetia
bASV569	e301e80410d00ef93719ad48fd077db6	Bacteria	0.08855	-1798.62	-1801.18	0.0236304	0.13818	bASV569|Microscillaceae	Bacteroidia	Cytophagales	Microscillaceae		NA	Myrtales	Myrtaceae	Fagraea
bASV644	c29d452f926cdf93d2b71a7e1bb60546	Bacteria	7.33137e-05	-1791.35	-1791.34	1	1	bASV644|MB-A2-108	MB-A2-108	MB-A2-108	MB-A2-108	MB-A2-108	NA	NA	Lamiaceae	Fagraea
bASV3272	aa9c321c63c52208d8065934f4be9ee9	Bacteria	0.188717	-1664.39	-1677.64	2.63941e-07	8.66394e-05	bASV3272|Afipia	Alphaproteobacteria	Rhizobiales	Xanthobacteraceae	Afipia	Polypodiopsida	Myrtales	Euphorbiaceae	Terminalia
bASV1218	7bff97bf1861ccd07cc0bee91de2a51f	Bacteria	5.27862e-05	-1681.31	-1681.31	0.996902	1	bASV1218|Sphingomonas	Alphaproteobacteria	Sphingomonadales	Sphingomonadaceae	Sphingomonas	NA	Asparagales	Asparagaceae	Rhaphidophora
bASV562	6d56d2f02b238e19111edd17acff0d8a	Bacteria	0.0144669	-1771.8	-1772.48	0.241957	0.56274	bASV562|Rhizobium_etli	Alphaproteobacteria	Rhizobiales	Rhizobiaceae	Allorhizobium-Neorhizobium-Pararhizobium-Rhizobium	NA	NA	NA	NA
bASV475	2aca6108f010f100ed06327ff12e0014	Bacteria	0.176353	-1811.08	-1813.12	0.0437638	0.192574	bASV475|uncultured_bacterium	TK10	TK10	TK10	TK10	NA	Arecales	Urticaceae	Dypsis
bASV186	b6c3e6d61404d559d64d10e6c0976d73	Bacteria	7.33137e-05	-1746.73	-1746.72	1	1	bASV186|Erwiniaceae	Gammaproteobacteria	Enterobacterales	Erwiniaceae		NA	NA	NA	Lagerstroemia
bASV1650	0b7a9690bd9500e3c8f808cfce7cef93	Bacteria	0.0879252	-1724.68	-1724.46	1	1	bASV1650|uncultured_bacterium	Alphaproteobacteria	Caulobacterales	Hyphomonadaceae	SWB02	NA	Malpighiales	Urticaceae	Musa
bASV2164	0492ec86deb88bd615662ac477dd2068	Bacteria	0.0132119	-1731.55	-1731.72	0.554261	0.977972	bASV2164|uncultured_delta	Myxococcia	Myxococcales	Myxococcaceae		NA	Arecales	Myrtaceae	Fagraea
bASV1781	b4346e822276f3066b53bb661bc044f1	Bacteria	7.33137e-05	-1738.19	-1738.19	1	1	bASV1781|Catelliglobosispora_koreensis	Actinobacteria	Micromonosporales	Micromonosporaceae	Catelliglobosispora	NA	NA	NA	Pandanus
bASV217	da1496dba867058de08485cab55fc4e9	Bacteria	0.0579791	-1805.5	-1806.31	0.203519	0.503726	bASV217|Chitinophagaceae	Bacteroidia	Chitinophagales	Chitinophagaceae		NA	Rosales	Araliaceae	Brassaiopsis
bASV25	87d74187b8b9e5438b008aa98adcdfd0	Bacteria	7.33137e-05	-1627.83	-1627.82	1	1	bASV25|Ralstonia	Gammaproteobacteria	Burkholderiales	Burkholderiaceae	Ralstonia	Others	Asparagales	Poaceae	NA
bASV437	5f987204f80a987ea72ee6e8e292dcdc	Bacteria	0.127988	-1811.16	-1814.84	0.00667468	0.0672222	bASV437|Gaiella	Thermoleophilia	Gaiellales	Gaiellaceae	Gaiella	NA	Myrtales	Myrtaceae	Alocasia
bASV1303	6f42fdb31beee0d7eb26601f5350a7a0	Bacteria	7.33137e-05	-1736.05	-1736.04	1	1	bASV1303|Sporichthya	Actinobacteria	Frankiales	Sporichthyaceae	Sporichthya	Polypodiopsida	NA	Araliaceae	Brassaiopsis
bASV4472	cde0cc5c86394a159d36bd6132b37c14	Bacteria	0.015903	-1631.22	-1631.31	0.682805	1	bASV4472|Roseomonas	Alphaproteobacteria	Acetobacterales	Acetobacteraceae	Roseomonas	NA	Myrtales	Myrtaceae	Pandanus
bASV4522	b1f9f27690d377be67f40e43f0113afb	Bacteria	0.122576	-1604.43	-1609.87	0.000969654	0.0223197	bASV4522|Amb-16S-1323	Alphaproteobacteria	Rhizobiales	Amb-16S-1323	Amb-16S-1323	NA	Rosales	Acanthaceae	Mycetia
bASV560	b548ec295e3d7c94b5033657c2b2fdbe	Bacteria	0.0762121	-1776.22	-1779.49	0.0104788	0.0847895	bASV560|Cellulomonas	Actinobacteria	Micrococcales	Cellulomonadaceae	Cellulomonas	NA	Lamiales	Myrtaceae	Fagraea
bASV6388	6b36964e923b0f1fa1e70aded44dbf90	Bacteria	0.00264996	-1661.53	-1661.55	0.863704	1	bASV6388|uncultured_Ktedonobacterales	Ktedonobacteria	Ktedonobacterales	JG30-KF-AS9	JG30-KF-AS9	NA	NA	NA	Musa
bASV1362	23199e4e6fd9dba759a3f35e49f62483	Bacteria	0.0374291	-1761.81	-1762.19	0.38045	0.762707	bASV1362|uncultured_bacterium	Acidimicrobiia	Microtrichales	Ilumatobacteraceae		NA	Sapindales	Myrtaceae	Brassaiopsis
bASV1595	13de0db4545034d8c55348a73e3507a5	Bacteria	0.0111065	-1752.84	-1753.03	0.537142	0.95461	bASV1595|RCP2-54	RCP2-54	RCP2-54	RCP2-54	RCP2-54	Polypodiopsida	Others	Poaceae	Horsfieldia
bASV642	9e6171ccd5c554aac5d299b306efbf83	Bacteria	0.146506	-1793.63	-1794.79	0.127717	0.378927	bASV642|uncultured_Truepera	Subgroup_5	Subgroup_5	Subgroup_5	Subgroup_5	Polypodiopsida	Arecales	Zingiberaceae	Musa
bASV163	43a6eb31904f15cc66133f3ae3d0df8a	Bacteria	0.0282623	-1824.12	-1824.7	0.282331	0.617326	bASV163|Ensifer	Alphaproteobacteria	Rhizobiales	Rhizobiaceae	Ensifer	NA	Asparagales	Araceae	Brassaiopsis
bASV1432	e1e063f083714271a4b4967176fda1c1	Bacteria	0.059038	-1750.34	-1751.66	0.10407	0.333734	bASV1432|metagenome	Acidimicrobiia	Microtrichales	Iamiaceae	Iamia	NA	Lamiales	Meliaceae	Fagraea
bASV2435	12dd4644cd87b73595138d04f7861dae	Bacteria	7.33137e-05	-1678.57	-1678.57	1	1	bASV2435|Neochlamydia	Chlamydiae	Chlamydiales	Parachlamydiaceae	Neochlamydia	NA	Asparagales	Apocynaceae	Fagraea
bASV3046	0becc947c5ec3ff06dbea74c4d96c584	Bacteria	0.480522	-1640.02	-1652.82	4.22118e-07	0.00010688	bASV3046|uncultured_bacterium	Alphaproteobacteria	Elsterales			Polypodiopsida	Lamiales	Acanthaceae	Mycetia
bASV2765	de2a804c6c532c3b8631ac2616fbd2a1	Bacteria	7.33137e-05	-1651.54	-1651.54	1	1	bASV2765|Rhizobiaceae	Alphaproteobacteria	Rhizobiales	Rhizobiaceae		Pinopsida	Fabales	Myrtaceae	Bauhinia
bASV558	52cf41512d8fb72bd7abd14f07ca161d	Bacteria	0.0585015	-1788.18	-1790.6	0.0277865	0.152947	bASV558|Paenibacillus	Bacilli	Paenibacillales	Paenibacillaceae	Paenibacillus	NA	Arecales	Araliaceae	Brassaiopsis
bASV1972	0999e002f19c09b0e00401d4ab86db1e	Bacteria	0.0790748	-1689.47	-1691.56	0.0408626	0.185954	bASV1972|uncultured_gamma	Gammaproteobacteria	Pseudomonadales	Moraxellaceae		NA	Malpighiales	Zingiberaceae	Polyalthia
bASV2414	9f2404f4985db464206508d0fd4d7ba6	Bacteria	0.00944089	-1717.93	-1717.98	0.753068	1	bASV2414|Pedosphaeraceae	Verrucomicrobiae	Pedosphaerales	Pedosphaeraceae	Pedosphaeraceae	NA	Arecales	Myrtaceae	NA
bASV1256	939610076ba150fc6ab70fde4c2e7ddf	Bacteria	0.0175557	-1774.53	-1774.79	0.470853	0.877143	bASV1256|uncultured_Desulfoglaeba	NB1-j	NB1-j	NB1-j	NB1-j	NA	Arecales	Myrtaceae	Mycetia
bASV7778	6948fbb1932449bc90223cd347fd0b10	Bacteria	7.33137e-05	-1657.26	-1657.25	1	1	bASV7778|Chloroflexi					NA	NA	Urticaceae	Fagraea
bASV3260	2fbc35fd527fa96a49a5457f0c2a8dea	Bacteria	0.0353341	-1693.33	-1693.97	0.260045	0.587362	bASV3260|Microtrichales	Acidimicrobiia	Microtrichales			NA	Myrtales	Apocynaceae	Heptapleurum
bASV634	02a6e7b905de7aa8c4434473e11ab96e	Bacteria	0.101905	-1796.38	-1802.85	0.000323482	0.0113758	bASV634|uncultured_Alphaproteobacteria	Alphaproteobacteria	Rhizobiales	Rhodomicrobiaceae	Rhodomicrobium	Pinopsida	Malpighiales	Moraceae	Bauhinia
bASV135	c6e6805538ad063e4a9171e068777b51	Bacteria	7.33137e-05	-1678.38	-1678.38	1	1	bASV135|67-14	Thermoleophilia	Solirubrobacterales	67-14	67-14	Pinopsida	Malpighiales	Acanthaceae	Podocarpus
bASV1358	e27583b83f898aa087e28123eecfadd1	Bacteria	7.33137e-05	-1755.65	-1755.65	1	1	bASV1358|Chryseolinea	Bacteroidia	Cytophagales	Microscillaceae	Chryseolinea	NA	NA	Acanthaceae	Mycetia
bASV41	8153c0a9287bc41e8a3e1e3095e61a94	Bacteria	7.33137e-05	-1500.43	-1500.42	1	1	bASV41|Nordella	Alphaproteobacteria	Rhizobiales	Rhizobiales_Incertae_Sedis	Nordella	NA	Asparagales	Araceae	Bauhinia
bASV322	b725f75a1f9fe4a214a83522fbe81410	Bacteria	0.0145491	-1821.53	-1821.75	0.510257	0.926143	bASV322|RCP2-54	RCP2-54	RCP2-54	RCP2-54	RCP2-54	NA	Arecales	Myrtaceae	Magnolia
bASV2136	93c864783d1ed42be9109a3b8da46bc9	Bacteria	0.0350109	-1691.38	-1691.59	0.515664	0.932361	bASV2136|Gemmatimonadaceae	Gemmatimonadetes	Gemmatimonadales	Gemmatimonadaceae		NA	NA	Urticaceae	Alocasia
bASV166	824150e31f3ee7a2719496173bdac315	Bacteria	0.0391474	-1673.18	-1674.3	0.135338	0.39452	bASV166|Polyangiaceae	Polyangia	Polyangiales	Polyangiaceae		NA	NA	Urticaceae	Horsfieldia
bASV3087	e7736fa46b1608f3c63e7452e793ef41	Bacteria	0.0308506	-1657.64	-1659.35	0.0649416	0.246156	bASV3087|uncultured_Acidobacteria	Subgroup_22	Subgroup_22	Subgroup_22	Subgroup_22	NA	NA	Lamiaceae	NA
bASV426	d9e10ad1bffaa1857d7ef731e22b20fd	Bacteria	0.169704	-1793.89	-1797.12	0.0109845	0.0870241	bASV426|uncultured_organism	Nitrospiria	Nitrospirales	Nitrospiraceae	Nitrospira	NA	Rosales	Urticaceae	Alocasia
bASV2473	08e9b12a3c4e000c66dcdbece1065ecd	Bacteria	0.211389	-1687.27	-1689.34	0.0422295	0.189416	bASV2473|RCP2-54	RCP2-54	RCP2-54	RCP2-54	RCP2-54	NA	NA	Urticaceae	Begonia
bASV1213	44fb674d0270becc59ff0e9d4aa0a289	Bacteria	7.33137e-05	-1674.82	-1674.82	1	1	bASV1213|0319-6G20	Oligoflexia	0319-6G20	0319-6G20	0319-6G20	NA	Lamiales	Acanthaceae	Rhaphidophora
bASV1172	3eb8fed183eebd2481bf3de423d46398	Bacteria	0.0667033	-1749.6	-1752	0.0283485	0.154362	bASV1172|uncultured_bacterium	Actinobacteria	Micrococcales	Intrasporangiaceae		NA	Arecales	Myrtaceae	Alocasia
bASV88	5546c7b5fac1d4434cd66b0bd3b556b2	Bacteria	0.119497	-1839.8	-1840.73	0.170786	0.45186	bASV88|uncultured_Acidobacteria	Acidobacteriae	Subgroup_2	Subgroup_2	Subgroup_2	Others	Malvales	Urticaceae	Musa
bASV4313	96a759440209f9855ea1ef25423fbd72	Bacteria	0.0808803	-1674.2	-1675.14	0.171558	0.452271	bASV4313|Blastocatellia	Blastocatellia				NA	Arecales	Arecaceae	Dypsis
bASV6348	d3664c782f4697223e522f2539e69d0b	Bacteria	7.33137e-05	-1654.64	-1654.64	1	1	bASV6348|Rhizobiales	Alphaproteobacteria	Rhizobiales			Polypodiopsida	Others	Urticaceae	Musa
bASV1393	18baad8b92ec0b8f5fafed36b73d7a7b	Bacteria	7.38195e-05	-1730.13	-1730.13	1	1	bASV1393|Subgroup_10	Thermoanaerobaculia	Thermoanaerobaculales	Thermoanaerobaculaceae	Subgroup_10	NA	NA	Urticaceae	NA
bASV199	e8150c696e82cb0037c67c537b2534a7	Bacteria	0.0634683	-1707.51	-1709.28	0.0597738	0.235377	bASV199|67-14	Thermoleophilia	Solirubrobacterales	67-14	67-14	Pinopsida	NA	NA	Fagraea
bASV2880	dd3de7e23fa9013d3670d3554e3d97a1	Bacteria	0.0374411	-1629.79	-1630.66	0.187448	0.478927	bASV2880|Paenibacillus	Bacilli	Paenibacillales	Paenibacillaceae	Paenibacillus	NA	Arecales	Acanthaceae	Pandanus
bASV2778	3e175ab2b393b6b83a7efa78e975486d	Bacteria	0.0390867	-1721.8	-1722.07	0.463862	0.873884	bASV2778|Acidobacteriales	Acidobacteriae	Acidobacteriales			NA	Arecales	Urticaceae	Mycetia
bASV64	27d178ff8451e9799070e6473ae35a35	Bacteria	0.0785491	-1829.27	-1831.23	0.0478112	0.204391	bASV64|Xanthobacteraceae	Alphaproteobacteria	Rhizobiales	Xanthobacteraceae		Others	Others	Poaceae	Horsfieldia
bASV710	6374ec32ae1799dec15de3b9548fc4af	Bacteria	0.0730187	-1781.06	-1782.23	0.125607	0.376127	bASV710|Gaiella	Thermoleophilia	Gaiellales	Gaiellaceae	Gaiella	NA	Arecales	Myrtaceae	Dypsis
bASV1117	1f318aee1d5a2b3d30ff1cd25add68e1	Bacteria	7.33137e-05	-1717.21	-1717.2	1	1	bASV1117|uncultured_bacterium	Alphaproteobacteria	Rhizobiales	Beijerinckiaceae	Roseiarcus	Others	Others	Poaceae	NA
bASV871	958a8af607bdd4b9ad5d3c1632492201	Bacteria	4.55177e-05	-1715.05	-1715.04	1	1	bASV871|Acidothermus	Actinobacteria	Frankiales	Acidothermaceae	Acidothermus	Others	Others	Zingiberaceae	Horsfieldia
bASV187	5c26046aab65b166c208c51411133efa	Bacteria	0.0152394	-1732.35	-1732.64	0.439839	0.842415	bASV187|uncultured_bacterium	Subgroup_5	Subgroup_5	Subgroup_5	Subgroup_5	NA	NA	Lamiaceae	Dypsis
bASV672	4bc5b844ed04f320dabc60c6e3520ad0	Bacteria	0.0366817	-1772.31	-1772.41	0.653903	1	bASV672|Acidobacteriaceae_(Subgroup_1)	Acidobacteriae	Acidobacteriales	Acidobacteriaceae_(Subgroup_1)		Polypodiopsida	Others	Poaceae	Musa
bASV2072	e65145be3bd29aa7416429dff55d6d9f	Bacteria	0.12564	-1687.06	-1687.72	0.249083	0.571735	bASV2072|TK10	TK10	TK10	TK10	TK10	Others	Others	Poaceae	Begonia
bASV5208	275b6d0903b1a963452d5018ad7d9887	Bacteria	0.0148859	-1600.17	-1600.4	0.49824	0.909549	bASV5208|Ilumatobacteraceae	Acidimicrobiia	Microtrichales	Ilumatobacteraceae		NA	Rosales	NA	Caryota
bASV927	de7f2933767e72e34770f38b5b5525d5	Bacteria	0.0453482	-1770.09	-1770.22	0.599358	1	bASV927|Nocardioides	Actinobacteria	Propionibacteriales	Nocardioidaceae	Nocardioides	NA	Asparagales	Asteraceae	Pandanus
bASV4256	ac550a5e761379468632d79f89b175cf	Bacteria	0.027264	-1605.89	-1606.05	0.564691	0.99085	bASV4256|MND1	Gammaproteobacteria	Burkholderiales	Nitrosomonadaceae	MND1	NA	NA	Araceae	Alocasia
bASV353	3e4d9a8ffac2c461c7b363c6ade86f1c	Bacteria	0.122752	-1783.12	-1785.48	0.0300031	0.158603	bASV353|Nakamurella	Actinobacteria	Frankiales	Nakamurellaceae	Nakamurella	NA	Rosales	Araceae	Fagraea
bASV484	305ba72ff7941300a12c87eb432a8413	Bacteria	0.220516	-1774.94	-1786.38	1.71733e-06	0.000362357	bASV484|Novosphingobium	Alphaproteobacteria	Sphingomonadales	Sphingomonadaceae	Novosphingobium	Magnoliopsida	Myrtales	Myrtaceae	Pandanus
bASV8350	c2b91d4f12f21ff0ef5d4568f58267b4	Bacteria	0.00977379	-1605.16	-1605.37	0.523639	0.939646	bASV8350|Nitrosococcaceae	Gammaproteobacteria	Nitrosococcales	Nitrosococcaceae		NA	Myrtales	Myrtaceae	Alocasia
bASV953	51b32b705eaf0b634eee393b6c4c6ec7	Bacteria	0.0844183	-1783.8	-1786.46	0.0210636	0.129449	bASV953|metagenome	Actinobacteria	Micromonosporales	Micromonosporaceae		Others	Myrtales	Myrtaceae	Dalbergia
bASV238	d13c0dfd7a250e98488927ee0721c7a3	Bacteria	0.076693	-1795.85	-1798.38	0.0246502	0.14185	bASV238|Burkholderia-Caballeronia-Paraburkholderia	Gammaproteobacteria	Burkholderiales	Burkholderiaceae	Burkholderia-Caballeronia-Paraburkholderia	Polypodiopsida	Others	Araliaceae	Heptapleurum
bASV3465	2080bb93a833322a846d907ab6865791	Bacteria	0.0543814	-1594.79	-1595.85	0.146456	0.414331	bASV3465|Gordonia_terrae	Actinobacteria	Corynebacteriales	Nocardiaceae	Gordonia	NA	Arecales	Asteraceae	Fagraea
bASV2350	5c5f18b6f1fa993c29255ac01e647444	Bacteria	7.33137e-05	-1685.03	-1685.03	1	1	bASV2350|uncultured_Conexibacteraceae	Thermoleophilia	Solirubrobacterales	Solirubrobacteraceae	Conexibacter	Polypodiopsida	NA	NA	Horsfieldia
bASV1302	65abc69394307ad0ea262bbb6d3c4c47	Bacteria	7.33137e-05	-1767.64	-1767.64	1	1	bASV1302|uncultured_Syntrophobacterales	bacteriap25	bacteriap25	bacteriap25	bacteriap25	NA	NA	NA	Alocasia
bASV190	6adf1062ea4182c0d2099d97ba712def	Bacteria	0.136824	-1753.06	-1757.59	0.00261968	0.0369797	bASV190|uncultured_Alphaproteobacteria	Alphaproteobacteria	Rhizobiales	Hyphomicrobiaceae	Pedomicrobium	NA	Malpighiales	Urticaceae	NA
bASV1616	a1ae1f3589c3a77691b7d2b1aca3d7db	Bacteria	0.00924476	-1694.53	-1694.61	0.697819	1	bASV1616|67-14	Thermoleophilia	Solirubrobacterales	67-14	67-14	NA	NA	Acanthaceae	NA
bASV2621	7f8619a97dbc23f4852147e2bded8bb0	Bacteria	0.403396	-1666.12	-1680.42	8.9713e-08	4.54307e-05	bASV2621|uncultured_bacterium	Alphaproteobacteria	Rhizobiales	A0839	A0839	Polypodiopsida	Lamiales	Urticaceae	Mycetia
bASV1521	06f856b78d110c4b93f2f7d79469ecf7	Bacteria	0.0722459	-1710.97	-1711.08	0.639441	1	bASV1521|uncultured_bacterium	Alphaproteobacteria	Elsterales			NA	Myrtales	Poaceae	Lagerstroemia
bASV852	349a9be9e2685cbcb27588f9d390ae08	Bacteria	0.0289947	-1711.78	-1711.97	0.536497	0.95461	bASV852|Acidothermus	Actinobacteria	Frankiales	Acidothermaceae	Acidothermus	Others	NA	Poaceae	Musa
bASV4847	d7aa4626da64aee865dc370d04802820	Bacteria	0.044748	-1672.68	-1676.24	0.00763449	0.0710681	bASV4847|uncultured_Anaerolineales	JG30-KF-CM66	JG30-KF-CM66	JG30-KF-CM66	JG30-KF-CM66	NA	Arecales	Myrtaceae	Fagraea
bASV1233	3c99ffc9e30d3082aefdfe4db5effc20	Bacteria	0.235665	-1707.78	-1712.76	0.00158815	0.0285192	bASV1233|Xanthobacteraceae	Alphaproteobacteria	Rhizobiales	Xanthobacteraceae		Others	Malvales	Poaceae	Terminalia
bASV853	ce13bf5c8237ce0d601fbf380968a0af	Bacteria	0.120633	-1767.16	-1769.82	0.0209942	0.129337	bASV853|Xanthobacteraceae	Alphaproteobacteria	Rhizobiales	Xanthobacteraceae		NA	NA	Urticaceae	Alocasia
bASV1788	5e2152c8522c09ddb897c5b9e4df03c7	Bacteria	0.382251	-1733.03	-1740.28	0.000141052	0.00711013	bASV1788|Chloroflexi					NA	Lamiales	Lamiaceae	Mycetia
bASV2939	a50edb0c59613db71545d2f5ee4b4e3b	Bacteria	7.33137e-05	-1706.62	-1706.62	1	1	bASV2939|uncultured_bacterium	Ktedonobacteria	Ktedonobacterales	JG30-KF-AS9	JG30-KF-AS9	NA	Arecales	Zingiberaceae	Horsfieldia
bASV2990	60f059596a4bbfb212dab6bb0b3ed481	Bacteria	0.0794989	-1676.23	-1681.57	0.00108516	0.0234841	bASV2990|Beijerinckiaceae	Alphaproteobacteria	Rhizobiales	Beijerinckiaceae		NA	Myrtales	Myrtaceae	Fagraea
bASV4834	2bddeb517446b54f28e440ab951be113	Bacteria	0.021324	-1646.75	-1646.98	0.496126	0.907652	bASV4834|uncultured_Planctomycetaceae	Pla4_lineage	Pla4_lineage	Pla4_lineage	Pla4_lineage	NA	Arecales	Zingiberaceae	NA
bASV3172	3856c73dde17732c51dac470a2ee671f	Bacteria	7.33137e-05	-1613.2	-1613.2	1	1	bASV3172|Ilumatobacteraceae	Acidimicrobiia	Microtrichales	Ilumatobacteraceae		NA	NA	NA	NA
bASV2296	391b289bfd90666c09b6b47a0ccffa14	Bacteria	0.180459	-1669.13	-1669.22	0.676249	1	bASV2296|uncultured_bacterium	Entotheonellia	Entotheonellales	Entotheonellaceae	Entotheonellaceae	NA	Lamiales	Urticaceae	Dypsis
bASV919	59a4139be203952a142d33e8cacf0c31	Bacteria	4.67684e-05	-1732.4	-1732.4	1	1	bASV919|Gaiella	Thermoleophilia	Gaiellales	Gaiellaceae	Gaiella	NA	NA	Lamiaceae	Alocasia
bASV2115	8550414738e989dd3f23486674df1fd6	Bacteria	7.33137e-05	-1687.67	-1687.67	1	1	bASV2115|Bacillus	Bacilli	Bacillales	Bacillaceae	Bacillus	NA	Arecales	Arecaceae	Pandanus
bASV1844	2de5dbc1204879e87d18da92c20bc718	Bacteria	7.33137e-05	-1675.43	-1675.43	1	1	bASV1844|Actinomycetospora_sp.	Actinobacteria	Pseudonocardiales	Pseudonocardiaceae	Actinomycetospora	NA	Arecales	Myrtaceae	Pandanus
bASV3150	7e218d922c4ea54b7e6efa6f5a6cb473	Bacteria	0.0981982	-1687.21	-1688.98	0.0599289	0.235621	bASV3150|uncultured_bacterium	Desulfuromonadia	Geobacterales	Geobacteraceae	Geobacteraceae	NA	NA	Myrtaceae	NA
bASV738	5957c45e8143328cdda9110b5a8249cc	Bacteria	7.33137e-05	-1793.83	-1793.83	1	1	bASV738|uncultured_bacterium	Alphaproteobacteria	Rhizobiales	Rhizobiales_Incertae_Sedis		NA	Sapindales	Urticaceae	Alocasia
bASV2130	93fafa4dd434748e51fb102c141754a3	Bacteria	0.0505367	-1715.87	-1716.68	0.202887	0.502852	bASV2130|uncultured_bacterium	TK10	TK10	TK10	TK10	NA	Arecales	Myrtaceae	Fagraea
bASV1118	0cec1150d1fa2e7dc80d422606e2a78f	Bacteria	0.00826977	-1739.11	-1739.16	0.751007	1	bASV1118|Pseudoxanthomonas	Gammaproteobacteria	Xanthomonadales	Xanthomonadaceae	Pseudoxanthomonas	NA	Myrtales	Myrtaceae	Fagraea
bASV1374	913b43aacf2355bc353bc5be31f6a66c	Bacteria	7.33137e-05	-1726.68	-1726.67	1	1	bASV1374|Nocardioides	Actinobacteria	Propionibacteriales	Nocardioidaceae	Nocardioides	NA	NA	Poaceae	Lagerstroemia
bASV2953	f14ff61b26b18b23c8906143ec660cba	Bacteria	0.0361814	-1681.65	-1682.31	0.250563	0.574142	bASV2953|Kribbella_sp.	Actinobacteria	Propionibacteriales	Nocardioidaceae	Nocardioides	NA	Lamiales	Acanthaceae	Alocasia
bASV719	b822f8069d71f1c658fce7d6931ee1c8	Bacteria	0.0413805	-1776.18	-1778.13	0.0484621	0.205194	bASV719|uncultured_bacterium	Verrucomicrobiae	Pedosphaerales	Pedosphaeraceae	ADurb.Bin063-1	NA	Arecales	Arecaceae	Cinnamomum
bASV202	c200f3e7e30d2c20532462723956da0e	Bacteria	0.300337	-1809.45	-1814.6	0.00132551	0.0266364	bASV202|Xanthobacteraceae	Alphaproteobacteria	Rhizobiales	Xanthobacteraceae		NA	Malvales	Poaceae	Horsfieldia
bASV1205	52e9929e7fb59cdad9f37770b3b8719f	Bacteria	0.0673163	-1761.28	-1762.19	0.177045	0.459772	bASV1205|uncultured_bacterium	Gammaproteobacteria	Burkholderiales	Nitrosomonadaceae	IS-44	NA	Arecales	Poaceae	Pandanus
bASV788	04abe65a81ae91e5e6429756e8e578af	Bacteria	7.33137e-05	-1781.75	-1781.75	1	1	bASV788|Comamonadaceae	Gammaproteobacteria	Burkholderiales	Comamonadaceae		NA	Others	Poaceae	Polyalthia
bASV3748	81d7728f6ae60d2724e68abe6eeeaea5	Bacteria	0.0466749	-1696.7	-1698.55	0.053914	0.220178	bASV3748|NB1-j	NB1-j	NB1-j	NB1-j	NB1-j	NA	Malpighiales	Acanthaceae	Alocasia
bASV3886	a3badc76fb847237e179566e2f183072	Bacteria	7.33137e-05	-1656.17	-1656.16	1	1	bASV3886|Xanthobacteraceae	Alphaproteobacteria	Rhizobiales	Xanthobacteraceae		Others	Arecales	Zingiberaceae	Musa
bASV1910	66781d7f58df478eea425caed34b2f28	Bacteria	0.0467061	-1761.08	-1761.83	0.220387	0.527928	bASV1910|uncultured_bacterium	Acidobacteriae	Subgroup_2	Subgroup_2	Subgroup_2	NA	Arecales	Meliaceae	Musa
bASV4195	4a3502b7626180c9333055b2b15d29ca	Bacteria	0.0866801	-1657.63	-1662.04	0.00297642	0.0407367	bASV4195|uncultured_bacterium	Subgroup_22	Subgroup_22	Subgroup_22	Subgroup_22	NA	Arecales	Myrtaceae	Dypsis
bASV865	9eda2b2fdf4ece7fe53eb486f117d52a	Bacteria	7.33137e-05	-1765.01	-1765.01	1	1	bASV865|Catenulispora	Actinobacteria	Catenulisporales	Catenulisporaceae	Catenulispora	Pinopsida	Malpighiales	Poaceae	NA
bASV1220	0f84afe5903c453b08e011d94f23264f	Bacteria	0.0173853	-1729.05	-1729.46	0.364294	0.737324	bASV1220|Arthrobacter	Actinobacteria	Micrococcales	Micrococcaceae	Arthrobacter	NA	Rosales	Urticaceae	Brassaiopsis
bASV1536	d60ea405ac372fd30bf046b060c8e3dc	Bacteria	7.33137e-05	-1761.14	-1761.14	1	1	bASV1536|Hyphomicrobium	Alphaproteobacteria	Rhizobiales	Hyphomicrobiaceae	Hyphomicrobium	Others	Gentianales	Myrtaceae	NA
bASV1419	a0a8fef6d1e5985fb3a2e0fffc9a0a82	Bacteria	0.0054011	-1703.53	-1703.57	0.792449	1	bASV1419|Nakamurella	Actinobacteria	Frankiales	Nakamurellaceae	Nakamurella	NA	Lamiales	Acanthaceae	Prunus
bASV70	4b013e029e326e07fb0d2b71f920824c	Bacteria	0.020865	-1864.86	-1864.84	1	1	bASV70|Xanthobacteraceae	Alphaproteobacteria	Rhizobiales	Xanthobacteraceae		Polypodiopsida	Others	Zingiberaceae	Musa
bASV1548	afab5a84d83c3b2ef6e241bef39bc0f2	Bacteria	0.0245498	-1768.95	-1769.44	0.320515	0.677415	bASV1548|uncultured_Phyllobacteriaceae	Alphaproteobacteria	Rhizobiales	A0839	A0839	NA	Malpighiales	Lauraceae	Mycetia
bASV450	a7a9017484c65c8bfc694082d1922771	Bacteria	0.366315	-1803	-1812.23	1.73441e-05	0.00168904	bASV450|Rhizobiaceae	Alphaproteobacteria	Rhizobiales	Rhizobiaceae		Polypodiopsida	Lamiales	Urticaceae	Mycetia
bASV3848	d632b702853c8e10f785e48b20e1bfd8	Bacteria	7.33137e-05	-1634.48	-1634.48	1	1	bASV3848|BIrii41	Polyangia	Polyangiales	BIrii41	BIrii41	NA	NA	NA	NA
bASV883	d0f34e5df12128b777a2a4d2e50e0942	Bacteria	0.24409	-1768.09	-1768.71	0.267114	0.596043	bASV883|Subgroup_10	Thermoanaerobaculia	Thermoanaerobaculales	Thermoanaerobaculaceae	Subgroup_10	NA	NA	Urticaceae	Mycetia
bASV3908	b2cc894dba041c1a5f942d91c7b76ab6	Bacteria	0.00411873	-1681.56	-1681.59	0.799164	1	bASV3908|metagenome	OM190	OM190	OM190	OM190	NA	Arecales	Lamiaceae	Dypsis
bASV2698	7d49b838a9fb5cc34298bf9882c3d18f	Bacteria	0.0346192	-1654.26	-1654.69	0.357507	0.73016	bASV2698|Allorhizobium-Neorhizobium-Pararhizobium-Rhizobium	Alphaproteobacteria	Rhizobiales	Rhizobiaceae	Allorhizobium-Neorhizobium-Pararhizobium-Rhizobium	NA	Sapindales	Urticaceae	Begonia
bASV770	81810665ac47105dd6ddada1ecd49821	Bacteria	5.31734e-05	-1719.54	-1719.54	1	1	bASV770|Burkholderia-Caballeronia-Paraburkholderia	Gammaproteobacteria	Burkholderiales	Burkholderiaceae	Burkholderia-Caballeronia-Paraburkholderia	Others	Malvales	Poaceae	Terminalia
bASV1608	93a8e6151af9c6dabab6191c14e9ff37	Bacteria	7.33137e-05	-1707.58	-1707.58	1	1	bASV1608|Lysinibacillus	Bacilli	Bacillales	Planococcaceae	Lysinibacillus	NA	NA	NA	Fagraea
bASV2871	ab255dc159adab49e23a17fb4f40d723	Bacteria	7.33137e-05	-1707.91	-1707.9	1	1	bASV2871|uncultured_Alphaproteobacteria	Alphaproteobacteria	Caulobacterales	Hyphomonadaceae	SWB02	Polypodiopsida	Arecales	Urticaceae	Begonia
bASV1770	52b5a8967f3c565f70cf54661c9e6893	Bacteria	0.0588052	-1721.22	-1722.35	0.132554	0.388008	bASV1770|Acidibacter	Gammaproteobacteria	Gammaproteobacteria_Incertae_Sedis	Unknown_Family	Acidibacter	NA	Malpighiales	Euphorbiaceae	Fagraea
bASV3020	b56e2f7c68047997ccea2bab3de17086	Bacteria	7.33137e-05	-1659.88	-1659.88	1	1	bASV3020|SC-I-84	Gammaproteobacteria	Burkholderiales	SC-I-84	SC-I-84	NA	Arecales	NA	NA
bASV1723	7104dc5f90bafc24725f369488c26701	Bacteria	0.0138944	-1698.98	-1699.19	0.522847	0.939646	bASV1723|Rhodanobacter	Gammaproteobacteria	Xanthomonadales	Rhodanobacteraceae	Rhodanobacter	Others	Arecales	Poaceae	Musa
bASV3425	009bf2e662e48f9debcf36f00aeb7be2	Bacteria	0.0133009	-1574.27	-1574.55	0.458858	0.868982	bASV3425|Aliihoeflea	Alphaproteobacteria	Rhizobiales	Rhizobiaceae	Aliihoeflea	NA	NA	NA	Begonia
bASV2105	8d73b0a5e1934bf2b9ee603f4e794142	Bacteria	7.33137e-05	-1704.26	-1704.25	1	1	bASV2105|Gammaproteobacteria	Gammaproteobacteria				NA	Arecales	Myrtaceae	Caryota
bASV741	f4808d03f1635fce2457572dcf66aa63	Bacteria	7.33137e-05	-1761.91	-1761.91	1	1	bASV741|uncultured_bacterium	Chloroflexia	Chloroflexales	Roseiflexaceae		NA	Arecales	Asparagaceae	Dypsis
bASV3123	718bd3538f9ed6e12b6ee7b06b24b1ac	Bacteria	0.0271991	-1642.29	-1642.68	0.381655	0.763311	bASV3123|Frankiaceae	Actinobacteria	Frankiales	Frankiaceae		NA	Malvales	Poaceae	Lagerstroemia
bASV210	843ad74bd2c566230f8c47fa0990d047	Bacteria	7.33137e-05	-1743.72	-1743.72	1	1	bASV210|Xanthobacteraceae	Alphaproteobacteria	Rhizobiales	Xanthobacteraceae		NA	NA	Urticaceae	Musa
bASV5133	bc031b5457c03deed5931fc5ff8d1f8e	Bacteria	7.33137e-05	-1622.66	-1622.66	1	1	bASV5133|Subgroup_13	Acidobacteriae	Subgroup_13	Subgroup_13	Subgroup_13	NA	Arecales	Myrtaceae	NA
bASV3572	0da52242ee7b9a40c926f4dee21fe059	Bacteria	7.33137e-05	-1705.39	-1705.39	1	1	bASV3572|Bauldia	Alphaproteobacteria	Rhizobiales	Rhizobiales_Incertae_Sedis	Bauldia	NA	NA	Arecaceae	Alocasia
bASV2757	a61e88560d1a949aed26fb1fdc426a99	Bacteria	0.0638027	-1659.52	-1661.52	0.0454506	0.197056	bASV2757|Catellatospora_citrea	Actinobacteria	Micromonosporales	Micromonosporaceae	Catellatospora	NA	Myrtales	Myrtaceae	Syzygium
bASV904	858f8c037604675661cf635c69f20db0	Bacteria	0.00589632	-1772.91	-1772.93	0.84143	1	bASV904|ADurb.Bin063-1	Verrucomicrobiae	Pedosphaerales	Pedosphaeraceae	ADurb.Bin063-1	NA	Arecales	Lamiaceae	Musa
bASV699	18efb80bd8c16add5868d412d19a2e4f	Bacteria	0.150145	-1762.25	-1765.06	0.0177727	0.118318	bASV699|uncultured_Rhodospirillales	Alphaproteobacteria	Reyranellales	Reyranellaceae		NA	Rosales	Moraceae	Brassaiopsis
bASV3402	fa63f26e650e845a60a39b27a3c76760	Bacteria	0.00880064	-1692.71	-1692.92	0.520754	0.93847	bASV3402|uncultured_actinobacterium	Acidimicrobiia	IMCC26256	IMCC26256	IMCC26256	NA	NA	NA	NA
bASV2141	bba92569c00d98a934a1a531b0fb797d	Bacteria	7.33137e-05	-1701.55	-1701.55	1	1	bASV2141|Gaiellales	Thermoleophilia	Gaiellales			NA	NA	NA	Fagraea
bASV1283	09e6666f22e35a1e40bb0685b0b4ac28	Bacteria	7.33137e-05	-1629.1	-1629.09	1	1	bASV1283|Brevundimonas	Alphaproteobacteria	Caulobacterales	Caulobacteraceae	Brevundimonas	NA	NA	NA	Prunus
bASV2205	f5b46a607b2606661c4d09e76adc3c36	Bacteria	0.044757	-1699.25	-1701.47	0.0347704	0.171337	bASV2205|Microtrichales	Acidimicrobiia	Microtrichales			NA	Myrtales	Myrtaceae	Fagraea
bASV1115	df0599c47d1937ad76bce9a7f5363eba	Bacteria	0.00437927	-1762.24	-1762.26	0.852908	1	bASV1115|uncultured_Rhodocyclaceae	Gammaproteobacteria	Burkholderiales	Nitrosomonadaceae	mle1-7	NA	Others	Poaceae	Horsfieldia
bASV2269	7e703103e55b7dd1307520c0495b1230	Bacteria	7.33137e-05	-1696.82	-1696.81	1	1	bASV2269|uncultured_bacterium	Acidobacteriae	Subgroup_2	Subgroup_2	Subgroup_2	Others	Others	Poaceae	NA
bASV2947	b563c45b12c6d445ba3b29c175572cd4	Bacteria	0.0758196	-1694.64	-1697.6	0.0148793	0.105327	bASV2947|Acidimicrobiia	Acidimicrobiia				NA	Myrtales	Myrtaceae	Alocasia
bASV777	72aa093991933a1e5ead4bdcb428f7ad	Bacteria	0.00724312	-1732.31	-1732.47	0.572145	0.998604	bASV777|Novosphingobium_resinovorum	Alphaproteobacteria	Sphingomonadales	Sphingomonadaceae	Novosphingobium	NA	Asparagales	Asteraceae	NA
bASV1427	29bcff244aa3d0e8d179fc8f6130d182	Bacteria	7.33137e-05	-1681.83	-1681.82	1	1	bASV1427|Novosphingobium	Alphaproteobacteria	Sphingomonadales	Sphingomonadaceae	Novosphingobium	NA	Myrtales	NA	Fagraea
bASV2476	fbf86dc8e79434cc6bccea3068c6e461	Bacteria	7.33137e-05	-1688.13	-1688.13	1	1	bASV2476|uncultured_bacterium	Alphaproteobacteria	Rhizobiales	Rhizobiales_Incertae_Sedis		NA	Arecales	Euphorbiaceae	Dypsis
bASV745	ecc630328495eeebfbe6f41f41f4bfc6	Bacteria	0.0370921	-1756.99	-1758.55	0.0779031	0.277715	bASV745|metagenome	Thermoleophilia	Solirubrobacterales	Solirubrobacteraceae	Solirubrobacter	NA	Rosales	Acanthaceae	Alocasia
bASV882	d4a3fe2604046cb9483e22ce0891db83	Bacteria	0.15352	-1791.06	-1792.54	0.0850773	0.293733	bASV882|uncultured_bacterium	Actinobacteria	Frankiales	Sporichthyaceae		NA	Others	Lamiaceae	Musa
bASV259	dde303e4965f097c0f7ff3dd25c7b415	Bacteria	0.0315842	-1758	-1758.5	0.318262	0.674851	bASV259|Burkholderia-Caballeronia-Paraburkholderia	Gammaproteobacteria	Burkholderiales	Burkholderiaceae	Burkholderia-Caballeronia-Paraburkholderia	Others	Malvales	Poaceae	Lagerstroemia
bASV117	7e1bf8409f643b006b4f95a1cb7664c0	Bacteria	0.111814	-1710.55	-1717.03	0.000319226	0.0113758	bASV117|uncultured_Rhodobium	Alphaproteobacteria	Rhizobiales	Methyloligellaceae		NA	Gentianales	Urticaceae	Brassaiopsis
bASV56	c391e3502f809137f39324ba930400bb	Bacteria	7.33137e-05	-1762.56	-1762.56	1	1	bASV56|Allorhizobium-Neorhizobium-Pararhizobium-Rhizobium	Alphaproteobacteria	Rhizobiales	Rhizobiaceae	Allorhizobium-Neorhizobium-Pararhizobium-Rhizobium	Others	NA	Araliaceae	Brassaiopsis
bASV2254	f64a0069380d10ec7df9b5d5a93a5d30	Bacteria	0.0678269	-1671.14	-1674.36	0.0111365	0.0872991	bASV2254|Bosea	Alphaproteobacteria	Rhizobiales	Beijerinckiaceae	Bosea	NA	Arecales	Zingiberaceae	Polyalthia
bASV932	6c7aa48164c0e85b3ca56c05f33abc28	Bacteria	0.0401209	-1770.98	-1771.86	0.186182	0.476656	bASV932|Microbacterium_arborescens	Actinobacteria	Micrococcales	Microbacteriaceae	Microbacterium	NA	Arecales	Myrtaceae	Fagraea
bASV779	e884a92597c0735e3ffb606f82c026f1	Bacteria	0.00388666	-1757.36	-1757.39	0.782927	1	bASV779|Phenylobacterium	Alphaproteobacteria	Caulobacterales	Caulobacteraceae	Phenylobacterium	NA	NA	Araliaceae	NA
bASV4637	a292fe97f575f3eadd3ab599702da470	Bacteria	7.33137e-05	-1651.79	-1651.79	1	1	bASV4637|metagenome	Alphaproteobacteria	Rhizobiales	Rhizobiales_Incertae_Sedis		NA	NA	Urticaceae	Alocasia
bASV3634	e3c1c524b22cad35372e733bed394850	Bacteria	0.0197588	-1672.45	-1672.63	0.551699	0.974129	bASV3634|Gemmatimonadaceae	Gemmatimonadetes	Gemmatimonadales	Gemmatimonadaceae		NA	Arecales	Urticaceae	Duranta
bASV694	4de86206f8cf5c6899a3b1b4e99cf35d	Bacteria	7.33137e-05	-1773.74	-1773.74	1	1	bASV694|uncultured_Acidobacteria	Acidobacteriae	Subgroup_2	Subgroup_2	Subgroup_2	Others	Malvales	Poaceae	Lagerstroemia
bASV2897	e48c69e86f9b5269d23119cc57195b1d	Bacteria	5.07439e-05	-1696.57	-1696.57	1	1	bASV2897|Sorangium	Polyangia	Polyangiales	Polyangiaceae	Sorangium	NA	Arecales	Lamiaceae	Dypsis
bASV1508	9d7acc88e1755dac80abda221e5f120c	Bacteria	7.33137e-05	-1705.32	-1705.31	1	1	bASV1508|Reyranella	Alphaproteobacteria	Reyranellales	Reyranellaceae	Reyranella	NA	NA	Poaceae	Terminalia
bASV1114	40bd566bc03bd643541b408014ea415f	Bacteria	0.0356574	-1735.77	-1737.12	0.100216	0.326574	bASV1114|Comamonadaceae	Gammaproteobacteria	Burkholderiales	Comamonadaceae		NA	NA	NA	Brassaiopsis
bASV3259	38c989c3ff62b31b8c516dd9c0c5ab01	Bacteria	0.197549	-1685.1	-1689.92	0.00190845	0.0310133	bASV3259|metagenome	Alphaproteobacteria	Rhizobiales	Devosiaceae		NA	Lamiales	Urticaceae	Mycetia
bASV2979	b52d720ddd2096a9424ca5800917cb2a	Bacteria	7.33137e-05	-1708.63	-1708.62	1	1	bASV2979|uncultured_Desulfuromonadales					NA	NA	NA	NA
bASV2796	e529eab0566eed52c1a23a08d1a6f245	Bacteria	0.0124898	-1681.56	-1681.76	0.524644	0.940126	bASV2796|uncultured_bacterium	Alphaproteobacteria	Rhizobiales	A0839	A0839	NA	Malvales	Poaceae	Lagerstroemia
bASV3456	2de0610988c93bf40bfcc11f75c3d5b0	Bacteria	0.232972	-1690.31	-1692.82	0.0250533	0.142871	bASV3456|Beijerinckiaceae	Alphaproteobacteria	Rhizobiales	Beijerinckiaceae		NA	Others	Urticaceae	Musa
bASV3240	97c0172887f1fb41e9f00b267008eb6d	Bacteria	7.33137e-05	-1671.9	-1671.89	1	1	bASV3240|Ancylobacter	Alphaproteobacteria	Rhizobiales	Xanthobacteraceae	Ancylobacter	NA	Myrtales	Myrtaceae	Fagraea
bASV1676	9fd8fe1de86e8ec40a4997fc1d0817c8	Bacteria	0.0770811	-1750.88	-1751.97	0.140732	0.403976	bASV1676|ADurb.Bin063-1	Verrucomicrobiae	Pedosphaerales	Pedosphaeraceae	ADurb.Bin063-1	NA	Myrtales	Myrtaceae	Prunus
bASV727	bce35a0c83202cb6cf51b16c894592d4	Bacteria	7.33137e-05	-1787.51	-1787.51	1	1	bASV727|uncultured_bacterium	Actinobacteria	Pseudonocardiales	Pseudonocardiaceae	Pseudonocardia	NA	Lamiales	Araliaceae	Fagraea
bASV237	59bb324cbabeb11bfcfbff1341037581	Bacteria	0.181042	-1803.03	-1803.76	0.225255	0.534532	bASV237|uncultured_soil	Acidobacteriae	Solibacterales	Solibacteraceae	Candidatus_Solibacter	Pinopsida	Others	Poaceae	Horsfieldia
bASV295	ee88ad4ccada9a38658d908d36da3726	Bacteria	7.33137e-05	-1777.52	-1777.52	1	1	bASV295|Niastella	Bacteroidia	Chitinophagales	Chitinophagaceae	Niastella	NA	NA	Acanthaceae	Brassaiopsis
bASV2163	c35a13e52197e5023dfebea66d1d3a42	Bacteria	7.33137e-05	-1726.7	-1726.7	1	1	bASV2163|Lysinimonas_soli	Actinobacteria	Micrococcales	Microbacteriaceae	Lysinimonas	NA	NA	Araceae	Rhaphidophora
bASV1649	33f9d2f72673e76cd70c345ac4b722a6	Bacteria	0.0432358	-1736.09	-1737.27	0.123337	0.372216	bASV1649|uncultured_bacterium	Chloroflexia	Chloroflexales	Roseiflexaceae		NA	Rosales	Myrtaceae	Bauhinia
bASV100	537dfbf4b337a7debf38928f07182db6	Bacteria	0.0115909	-1791.46	-1791.64	0.545046	0.963726	bASV100|Allorhizobium-Neorhizobium-Pararhizobium-Rhizobium	Alphaproteobacteria	Rhizobiales	Rhizobiaceae	Allorhizobium-Neorhizobium-Pararhizobium-Rhizobium	Others	Fabales	Zingiberaceae	Podocarpus
bASV1034	438e1df4c429d427940211455aaff68f	Bacteria	0.114944	-1734.81	-1736.75	0.0490908	0.206819	bASV1034|Acidobacteriales	Acidobacteriae	Acidobacteriales			Others	Malvales	Poaceae	Lagerstroemia
bASV5699	62aa53711cd025dba8ab4096348c4428	Bacteria	7.33137e-05	-1621.59	-1621.58	1	1	bASV5699|metagenome	vadinHA49	vadinHA49	vadinHA49	vadinHA49	NA	NA	Urticaceae	NA
bASV690	b609ffde54df41b41b8aef3832732336	Bacteria	0.13393	-1797.56	-1801.53	0.00481961	0.0542367	bASV690|Rhizobiaceae	Alphaproteobacteria	Rhizobiales	Rhizobiaceae		NA	Arecales	Araceae	Brassaiopsis
bASV2404	838385c85764410a2f00830abf6eb414	Bacteria	0.0287494	-1732.73	-1733.16	0.350278	0.721061	bASV2404|uncultured_Gemmatimonadales	S0134_terrestrial_group	S0134_terrestrial_group	S0134_terrestrial_group	S0134_terrestrial_group	Others	Myrtales	Myrtaceae	Brassaiopsis
bASV1458	04ab051745170d077998e1df21f2076a	Bacteria	0.110672	-1744.81	-1751.75	0.000195438	0.00883659	bASV1458|Gemmatimonas	Gemmatimonadetes	Gemmatimonadales	Gemmatimonadaceae	Gemmatimonas	NA	Rosales	Myrtaceae	Alocasia
bASV339	ae81b8c1b0129b3f4c6663745c1638f6	Bacteria	0.133448	-1810.72	-1815.74	0.00152621	0.0278013	bASV339|MND1	Gammaproteobacteria	Burkholderiales	Nitrosomonadaceae	MND1	NA	Myrtales	Myrtaceae	Bauhinia
bASV1410	914ba6298288e8b263c5c19e4d955a0b	Bacteria	7.33137e-05	-1736.2	-1736.19	1	1	bASV1410|Dokdonella	Gammaproteobacteria	Xanthomonadales	Rhodanobacteraceae	Dokdonella	NA	NA	Urticaceae	Begonia
bASV1831	e9a88c31daeedaa8d003bc17fd94d217	Bacteria	0.0307791	-1744.14	-1745.05	0.17651	0.459361	bASV1831|Nocardioides	Actinobacteria	Propionibacteriales	Nocardioidaceae	Nocardioides	NA	Arecales	Myrtaceae	Alocasia
bASV1083	2845c898b70be90cfd82cc4a8e599f9f	Bacteria	0.00583438	-1700.01	-1700.05	0.793498	1	bASV1083|uncultured_bacterium	Chloroflexia	Chloroflexales	Roseiflexaceae		NA	Rosales	NA	Magnolia
bASV372	4cefd65c9991df4471c744c7ca2e3cb0	Bacteria	7.33137e-05	-1747.8	-1747.79	1	1	bASV372|Pseudomonas	Gammaproteobacteria	Pseudomonadales	Pseudomonadaceae	Pseudomonas	NA	NA	NA	Rhaphidophora
bASV2964	2fb9a5dc1d046fb73d643dcfb8bb7a8d	Bacteria	0.22462	-1677.81	-1679.17	0.0997637	0.325675	bASV2964|Acidobacteriae	Acidobacteriae				Pinopsida	Others	Poaceae	Podocarpus
bASV1708	bfcb97481daa2a9068842e4dca84d594	Bacteria	0.0180155	-1699.67	-1699.7	0.808394	1	bASV1708|Kouleothrix	Chloroflexia	Chloroflexales	Roseiflexaceae	Kouleothrix	NA	NA	NA	Lagerstroemia
bASV1547	6dc881c8f12cecbc576a61b8b601d4d7	Bacteria	0.284814	-1734.79	-1739.99	0.00126048	0.0257382	bASV1547|uncultured_Solirubrobacter	Thermoleophilia	Gaiellales			NA	Lamiales	Urticaceae	Mycetia
bASV3887	4f16438ed03b4cd75881f7beeea99c49	Bacteria	0.0558422	-1673.23	-1673.89	0.249287	0.571735	bASV3887|Candidatus_Solibacter	Acidobacteriae	Solibacterales	Solibacteraceae	Candidatus_Solibacter	NA	Arecales	Urticaceae	Fagraea
bASV1014	54284fa58e0446e2b8080c14ebb45095	Bacteria	0.122126	-1765.66	-1769.32	0.00681524	0.0675857	bASV1014|MND1	Gammaproteobacteria	Burkholderiales	Nitrosomonadaceae	MND1	Others	Arecales	Poaceae	Horsfieldia
bASV177	b052127f038534347cc183163bdc8616	Bacteria	0.125636	-1771.15	-1774.54	0.00922094	0.0794997	bASV177|uncultured_Conexibacter	Thermoleophilia	Gaiellales	Gaiellaceae	Gaiella	Polypodiopsida	Lamiales	Urticaceae	Dypsis
bASV615	43976d636bdfaa1ea56d89438eab6c82	Bacteria	7.33137e-05	-1756.8	-1756.8	1	1	bASV615|Pajaroellobacter	Polyangia	Polyangiales	Polyangiaceae	Pajaroellobacter	NA	NA	Meliaceae	Alocasia
bASV3162	cc7201a86e4dca9ec98bf547b3e35280	Bacteria	0.0408374	-1709.06	-1710.19	0.132174	0.387792	bASV3162|Arenimonas	Gammaproteobacteria	Xanthomonadales	Xanthomonadaceae	Arenimonas	NA	Myrtales	Myrtaceae	Codiaeum
bASV5405	2da36f3d51aaad2d1fb743247f5c2aba	Bacteria	7.33137e-05	-1621.2	-1621.19	1	1	bASV5405|uncultured_delta	Polyangia	mle1-27	mle1-27	mle1-27	NA	NA	NA	Fagraea
bASV2298	7e2f6f12e3f8813d989c565bd93f6bc3	Bacteria	0.16839	-1619.56	-1629.73	6.48813e-06	0.000898709	bASV2298|Paenibacillus	Bacilli	Paenibacillales	Paenibacillaceae	Paenibacillus	NA	Lamiales	Acanthaceae	Heptapleurum
bASV715	bcb50a80194085a1a151522943b5a20f	Bacteria	0.0632881	-1747.5	-1749.92	0.0277831	0.152947	bASV715|Haliangium	Polyangia	Haliangiales	Haliangiaceae	Haliangium	NA	Lamiales	Acanthaceae	NA
bASV300	1c69e07a3df71c883f22b4884e823938	Bacteria	0.133259	-1827.04	-1829.35	0.0315834	0.163202	bASV300|Marmoricola_sp.	Actinobacteria	Propionibacteriales	Nocardioidaceae	Nocardioides	NA	Arecales	Myrtaceae	Alocasia
bASV803	d942156375c38abda051d0ef0f73c97d	Bacteria	7.33137e-05	-1774.94	-1774.93	1	1	bASV803|SC-I-84	Gammaproteobacteria	Burkholderiales	SC-I-84	SC-I-84	NA	NA	Urticaceae	Fagraea
bASV1575	75b1b483f21b80acb480a2ca59d79fb3	Bacteria	0.0829872	-1743.77	-1747.38	0.00720228	0.0683003	bASV1575|uncultured_bacterium	Actinobacteria	Micrococcales	Demequinaceae	Demequina	NA	Myrtales	Myrtaceae	Alocasia
bASV390	304c583c23c0b52096d130e3a00b6436	Bacteria	7.33137e-05	-1782.41	-1782.4	1	1	bASV390|Paenibacillus	Bacilli	Paenibacillales	Paenibacillaceae	Paenibacillus	NA	NA	Acanthaceae	Brassaiopsis
bASV605	a06319bdd0803dc45253522fe9bb4997	Bacteria	0.00805125	-1780.32	-1780.46	0.592153	1	bASV605|Acidibacter	Gammaproteobacteria	Gammaproteobacteria_Incertae_Sedis	Unknown_Family	Acidibacter	NA	Malvales	Urticaceae	Lagerstroemia
bASV252	00d4373f3f7db74e433ff21ef3e263cb	Bacteria	0.134963	-1785.8	-1789.59	0.00595073	0.0624726	bASV252|Rhizobiaceae	Alphaproteobacteria	Rhizobiales	Rhizobiaceae		Magnoliopsida	Rosales	Myrtaceae	Alocasia
bASV3721	5bf6a87dc85a7b582634dbde9032daff	Bacteria	0.0473273	-1671.14	-1672.71	0.0760668	0.273193	bASV3721|Actinomycetospora	Actinobacteria	Pseudonocardiales	Pseudonocardiaceae	Actinomycetospora	NA	Arecales	Arecaceae	Rhaphidophora
bASV474	e0fd94a8b40987667bda2dfbafdf06b5	Bacteria	7.33137e-05	-1784.3	-1784.29	1	1	bASV474|Acidothermus	Actinobacteria	Frankiales	Acidothermaceae	Acidothermus	NA	Others	NA	Musa
bASV890	896020fc7292fef71db047dffee9292a	Bacteria	7.33137e-05	-1759.66	-1759.66	1	1	bASV890|Acidibacter	Gammaproteobacteria	Gammaproteobacteria_Incertae_Sedis	Unknown_Family	Acidibacter	NA	Others	Lamiaceae	Horsfieldia
bASV409	d0981381010d4ef90c54c7fac5ce8c93	Bacteria	7.33137e-05	-1823.9	-1823.9	1	1	bASV409|Acidibacter	Gammaproteobacteria	Gammaproteobacteria_Incertae_Sedis	Unknown_Family	Acidibacter	Polypodiopsida	Others	Zingiberaceae	Musa
bASV3056	e889749afc3825a8a26d438998ae730f	Bacteria	7.33137e-05	-1682.53	-1682.53	1	1	bASV3056|Alphaproteobacteria	Alphaproteobacteria				Polypodiopsida	Others	Urticaceae	NA
bASV1662	b30839c55973de441a7f530d9d960791	Bacteria	0.168155	-1739.76	-1741.12	0.0998119	0.325675	bASV1662|Candidatus_Solibacter	Acidobacteriae	Solibacterales	Solibacteraceae	Candidatus_Solibacter	Polypodiopsida	Lamiales	Urticaceae	Mycetia
bASV992	d912837e5dbe9bb029791590982c786b	Bacteria	0.0433262	-1760.54	-1761.91	0.0978286	0.321275	bASV992|IMCC26256	Acidimicrobiia	IMCC26256	IMCC26256	IMCC26256	NA	Lamiales	Phyllanthaceae	Alocasia
bASV947	9247b99b7cb6595e5b65e5fa7b36244e	Bacteria	0.0272277	-1766.8	-1767.08	0.455668	0.864234	bASV947|Gaiella	Thermoleophilia	Gaiellales	Gaiellaceae	Gaiella	NA	Myrtales	Myrtaceae	Fagraea
bASV3736	203f2a61e28809f987a5f277e5176c13	Bacteria	0.295427	-1689.38	-1695.82	0.000332179	0.0115216	bASV3736|metagenome	Acidobacteriae	Bryobacterales	Bryobacteraceae	Bryobacter	NA	Rosales	Urticaceae	Alocasia
bASV263	7a8a29d705678743084e47e3f7e90905	Bacteria	0.0922981	-1767.45	-1770.71	0.0106358	0.0851359	bASV263|Gaiellales	Thermoleophilia	Gaiellales			NA	Arecales	Lamiaceae	Fagraea
bASV181	ca23b3b494b7ebc82c45d1f412a187fc	Bacteria	0.100148	-1809.48	-1811.11	0.0710892	0.261616	bASV181|Allorhizobium-Neorhizobium-Pararhizobium-Rhizobium	Alphaproteobacteria	Rhizobiales	Rhizobiaceae	Allorhizobium-Neorhizobium-Pararhizobium-Rhizobium	NA	Fabales	Euphorbiaceae	Brassaiopsis
bASV1771	6c0a410de862f6f2bef75a745d1c7d8c	Bacteria	7.33137e-05	-1695.51	-1695.5	1	1	bASV1771|Nocardioides	Actinobacteria	Propionibacteriales	Nocardioidaceae	Nocardioides	NA	NA	Myrtaceae	Alocasia
bASV2552	4bc54afad844aa4172bb032694f879ef	Bacteria	0.00866916	-1713.33	-1713.51	0.558775	0.9836	bASV2552|Haliangium	Polyangia	Haliangiales	Haliangiaceae	Haliangium	NA	Arecales	Malvaceae	Pterospermum
bASV1678	e2984d3076536ef8c8685c578dcb36e4	Bacteria	0.133211	-1666.02	-1665.98	1	1	bASV1678|Gaiellales	Thermoleophilia	Gaiellales			NA	Others	Araceae	Begonia
bASV1056	2501952b79f19943e588c48a153c7e7a	Bacteria	0.0648081	-1760.01	-1761.38	0.0987292	0.323811	bASV1056|SC-I-84	Gammaproteobacteria	Burkholderiales	SC-I-84	SC-I-84	NA	Rosales	Urticaceae	Alocasia
bASV448	b5178726fa3aaf204de77b343ad0ede6	Bacteria	7.33137e-05	-1794.8	-1794.8	1	1	bASV448|uncultured_forest	Acidobacteriae	Acidobacteriales			NA	Arecales	Urticaceae	Horsfieldia
bASV1983	fe3c35e37972ac1ba0b9f2aeef7886aa	Bacteria	0.175152	-1725.43	-1731.19	0.000691349	0.0188225	bASV1983|Sphingomonadaceae	Alphaproteobacteria	Sphingomonadales	Sphingomonadaceae		Others	Rosales	Myrtaceae	Alocasia
bASV708	0b75b8729098c53bd58f0bcbe7da9ba2	Bacteria	0.16805	-1750.03	-1755.48	0.00096119	0.0223197	bASV708|metagenome	Bacteroidia	Sphingobacteriales	AKYH767	AKYH767	NA	Myrtales	Acanthaceae	Fagraea
bASV646	c13d52ae5474c7acd4f84c2970b0e6bf	Bacteria	0.00408083	-1789.15	-1789.15	0.934696	1	bASV646|uncultured_bacterium	Ktedonobacteria	C0119	C0119	C0119	NA	Lamiales	Myrtaceae	NA
bASV367	35150e67f63b8350b2c9b9b8ce0d24a7	Bacteria	0.00624017	-1783.01	-1783.09	0.692581	1	bASV367|Sphingomonas	Alphaproteobacteria	Sphingomonadales	Sphingomonadaceae	Sphingomonas	NA	NA	Urticaceae	Fagraea
bASV1727	086afd2d078f071374503cb2677574dc	Bacteria	7.33137e-05	-1683.33	-1683.33	1	1	bASV1727|uncultured_actinobacterium	Thermoleophilia	Solirubrobacterales	67-14	67-14	NA	Myrtales	Myrtaceae	Fagraea
bASV3146	3284e396202d01cd024b9a1a3619cd6b	Bacteria	0.0695881	-1671.45	-1674.11	0.0209583	0.129337	bASV3146|Propionibacteriaceae	Actinobacteria	Propionibacteriales	Propionibacteriaceae		NA	Arecales	Myrtaceae	Alocasia
bASV6195	611ef94b5deb4cce0ddba3057b786eb5	Bacteria	0.0860278	-1650.54	-1651.46	0.175088	0.457506	bASV6195|NB1-j	NB1-j	NB1-j	NB1-j	NB1-j	NA	NA	Acanthaceae	Alocasia
bASV2126	9103bbb4580ea74df4bd20f486fc4667	Bacteria	0.124919	-1688.45	-1694.32	0.000616993	0.0175531	bASV2126|Afipia	Alphaproteobacteria	Rhizobiales	Xanthobacteraceae	Afipia	Magnoliopsida	Myrtales	Myrtaceae	Fagraea
bASV1667	def0600eb7ff1802c38acc42aa0001af	Bacteria	7.33137e-05	-1692.36	-1692.36	1	1	bASV1667|Actinomarinales	Acidimicrobiia	Actinomarinales			NA	NA	Asteraceae	Alocasia
bASV221	89b75caecd211abfa9030a2334d1b3ec	Bacteria	0.0361831	-1806.09	-1807.53	0.0890966	0.301595	bASV221|Burkholderia-Caballeronia-Paraburkholderia	Gammaproteobacteria	Burkholderiales	Burkholderiaceae	Burkholderia-Caballeronia-Paraburkholderia	Others	Asparagales	Poaceae	Lagerstroemia
bASV74	6d2af41a2d78137b75ce2e0772f81ed6	Bacteria	7.33137e-05	-1774.16	-1774.16	1	1	bASV74|Comamonadaceae	Gammaproteobacteria	Burkholderiales	Comamonadaceae		NA	NA	Acanthaceae	Alocasia
bASV525	14217003cdeb27f6285629bd787f7aae	Bacteria	0.0243478	-1794.12	-1794.32	0.527949	0.944045	bASV525|Fictibacillus_barbaricus	Bacilli	Bacillales	Bacillaceae	Fictibacillus	Polypodiopsida	NA	Urticaceae	Pterospermum
bASV1023	da0f11fd4a334e0de37ce0557c4261ba	Bacteria	0.0711176	-1775.49	-1777.02	0.0799093	0.282546	bASV1023|Mesorhizobium_tamadayense	Alphaproteobacteria	Rhizobiales	Rhizobiaceae	Mesorhizobium	NA	Fabales	Meliaceae	Codiaeum
bASV1133	872207bcbe6026668948e2f9dd762106	Bacteria	0.0103273	-1766.69	-1766.79	0.645434	1	bASV1133|Amaricoccus	Alphaproteobacteria	Rhodobacterales	Rhodobacteraceae	Amaricoccus	NA	Rosales	Myrtaceae	Alocasia
bASV1469	13a6326219ba8511c12cc0aeeb4f147d	Bacteria	7.33137e-05	-1710.49	-1710.49	1	1	bASV1469|Terrimonas	Bacteroidia	Chitinophagales	Chitinophagaceae	Terrimonas	NA	Myrtales	NA	Lagerstroemia
bASV1324	ad366ea0c20eb6ce668f30c71309852f	Bacteria	7.33137e-05	-1739.57	-1739.56	1	1	bASV1324|Methylobacterium-Methylorubrum	Alphaproteobacteria	Rhizobiales	Beijerinckiaceae	Methylobacterium-Methylorubrum	NA	NA	NA	NA
bASV298	a3288b663380c5c3ac516e125709221c	Bacteria	0.0248571	-1811.61	-1812.46	0.191387	0.486479	bASV298|Steroidobacter	Gammaproteobacteria	Steroidobacterales	Steroidobacteraceae	Steroidobacter	NA	Fabales	Myrtaceae	Bauhinia
bASV1211	9f2b00bdd2934bfc5a9614e16ef3733e	Bacteria	0.0955654	-1768.87	-1771.23	0.0297411	0.158203	bASV1211|uncultured_bacterium	Chloroflexia	Chloroflexales	Roseiflexaceae		NA	Rosales	Myrtaceae	Fagraea
bASV4137	73be1922198347ad020333b54da09b10	Bacteria	0.00910602	-1683.11	-1683.32	0.512667	0.929186	bASV4137|uncultured_Pelobacter	Latescibacterota	Latescibacterota	Latescibacterota	Latescibacterota	NA	Rosales	NA	Alocasia
bASV1255	94331bffe30335294206d600eeab7e70	Bacteria	0.0870159	-1742.32	-1744.01	0.0660996	0.248677	bASV1255|Gammaproteobacteria	Gammaproteobacteria				NA	Malpighiales	Myrtaceae	Codiaeum
bASV2558	1f120b3d5a51989efe41b75c2bcd5d61	Bacteria	7.33137e-05	-1706.91	-1706.91	1	1	bASV2558|IMCC26256	Acidimicrobiia	IMCC26256	IMCC26256	IMCC26256	NA	Lamiales	Lamiaceae	Alocasia
bASV2224	1431b2de33b51a31ed7ed564f10ae4cf	Bacteria	0.027694	-1699.85	-1700.53	0.2427	0.563261	bASV2224|Reyranella	Alphaproteobacteria	Reyranellales	Reyranellaceae	Reyranella	NA	Arecales	Lauraceae	Fagraea
bASV408	9e0abe34f1af0b7d8d0b76b1c35bfed6	Bacteria	0.0408759	-1754.91	-1756.95	0.0436404	0.192574	bASV408|Novosphingobium	Alphaproteobacteria	Sphingomonadales	Sphingomonadaceae	Novosphingobium	NA	NA	NA	NA
bASV1478	a28228e51196ca13ef782cc30a164d9a	Bacteria	7.33137e-05	-1683.18	-1683.17	1	1	bASV1478|uncultured_Conexibacter	Thermoleophilia	Gaiellales	Gaiellaceae	Gaiella	Others	Asparagales	Poaceae	NA
bASV1947	1ca1eebe5e944a946bde07598a1dce3e	Bacteria	0.0158027	-1712.75	-1713.08	0.415497	0.808017	bASV1947|TK10	TK10	TK10	TK10	TK10	Polypodiopsida	NA	Lamiaceae	Horsfieldia
bASV1285	80ee4fb49d30e97855bfec31f9e150bb	Bacteria	7.33137e-05	-1726.23	-1726.23	1	1	bASV1285|uncultured_Myxococcales	Polyangia	Haliangiales	Haliangiaceae	Haliangium	NA	NA	Acanthaceae	Dypsis
bASV369	3c8bd7e8b899a21df3ec9e2389689ad8	Bacteria	0.0507648	-1724.91	-1726.46	0.0784842	0.278722	bASV369|Devosia	Alphaproteobacteria	Rhizobiales	Devosiaceae	Devosia	NA	Asparagales	Araceae	Brassaiopsis
bASV3599	3fd0fb0a69512e2ad857d9f7be73ca15	Bacteria	0.0686619	-1616.25	-1619.07	0.0176702	0.118318	bASV3599|Chitinophagaceae	Bacteroidia	Chitinophagales	Chitinophagaceae		NA	Asparagales	Asparagaceae	Fagraea
bASV987	0048c6a18fd371d709b3271b91f5bcfb	Bacteria	7.33137e-05	-1724.66	-1724.65	1	1	bASV987|Solirubrobacter	Thermoleophilia	Solirubrobacterales	Solirubrobacteraceae	Solirubrobacter	NA	Arecales	Apocynaceae	Fagraea
bASV132	09908600fdb7ffad77122da356833f79	Bacteria	7.33137e-05	-1831.83	-1831.82	1	1	bASV132|uncultured_Pseudolabrys	Alphaproteobacteria	Rhizobiales	Xanthobacteraceae		NA	Others	Poaceae	Horsfieldia
bASV304	0d8481a2c0f838273c4fa01c505da849	Bacteria	0.0742937	-1558.9	-1563.25	0.00317613	0.04255	bASV304|uncultured_Ferrimicrobium	Acidimicrobiia	IMCC26256	IMCC26256	IMCC26256	NA	Lamiales	Urticaceae	Dypsis
bASV1047	5ae85496f95efae410b51ee3ce07bb86	Bacteria	7.33137e-05	-1758.13	-1758.13	1	1	bASV1047|Gaiellales	Thermoleophilia	Gaiellales			NA	NA	Lamiaceae	NA
bASV1235	0b94d4f31b74933558e26e87581c29d8	Bacteria	0.0375513	-1680.26	-1682.88	0.0219164	0.132125	bASV1235|Gaiella	Thermoleophilia	Gaiellales	Gaiellaceae	Gaiella	NA	Asparagales	Asteraceae	Fagraea
bASV2347	a77f65b491ff0aeb0c07ca7c7e1dab7a	Bacteria	0.0696372	-1685.01	-1686.22	0.11962	0.365794	bASV2347|Xanthobacteraceae	Alphaproteobacteria	Rhizobiales	Xanthobacteraceae		Others	Arecales	Urticaceae	Dypsis
bASV729	b5df53422a18ccdad38c5fea5212060e	Bacteria	7.33137e-05	-1750.08	-1750.08	1	1	bASV729|Novosphingobium	Alphaproteobacteria	Sphingomonadales	Sphingomonadaceae	Novosphingobium	NA	NA	NA	Brassaiopsis
bASV120	379f4311a85703caab8db9def0afca77	Bacteria	0.149643	-1816.91	-1819.63	0.0196245	0.124534	bASV120|uncultured_Acidobacteria	Acidobacteriae	Subgroup_2	Subgroup_2	Subgroup_2	Others	Malvales	Poaceae	Musa
bASV2210	1bbd6dffc62a6ff282e9adae279fb99a	Bacteria	0.269071	-1711.82	-1718.91	0.000165724	0.00790744	bASV2210|Gemmatimonas	Gemmatimonadetes	Gemmatimonadales	Gemmatimonadaceae	Gemmatimonas	NA	Rosales	Meliaceae	Mycetia
bASV692	787d31f327fd212ba6ab05567e0e41a1	Bacteria	0.0203303	-1780.44	-1780.93	0.322839	0.680056	bASV692|Ellin6067	Gammaproteobacteria	Burkholderiales	Nitrosomonadaceae	Ellin6067	NA	Myrtales	Arecaceae	Fagraea
bASV2577	b11ba8c57787089b88593831d2a5023c	Bacteria	7.33137e-05	-1658.99	-1658.99	1	1	bASV2577|metagenome	Polyangia	Polyangiales	Polyangiaceae		NA	Malvales	NA	Horsfieldia
bASV2741	2e625f82054340102bcc19d0fea4f45d	Bacteria	0.0102228	-1727.56	-1727.67	0.651923	1	bASV2741|uncultured_bacterium	Polyangia	Polyangiales	BIrii41	BIrii41	NA	Myrtales	Myrtaceae	Fagraea
bASV6397	094f3a9a6561f9127916f7c18cb1e4f9	Bacteria	0.0337769	-1621.41	-1622.45	0.149319	0.41922	bASV6397|NB1-j	NB1-j	NB1-j	NB1-j	NB1-j	NA	Malpighiales	Myrtaceae	Rhaphidophora
bASV2359	70b90f1fcba432cecf5d1a57c6b7b6ad	Bacteria	0.00147116	-1690.34	-1690.34	0.922186	1	bASV2359|Steroidobacteraceae	Gammaproteobacteria	Steroidobacterales	Steroidobacteraceae		NA	Arecales	Apocynaceae	Fagraea
bASV2378	2c588b65fa7723cd4dba4532bb07b7d6	Bacteria	7.33137e-05	-1685.55	-1685.54	1	1	bASV2378|Candidatus_Solibacter	Acidobacteriae	Solibacterales	Solibacteraceae	Candidatus_Solibacter	NA	NA	NA	Lagerstroemia
bASV48	f31b065dce77e593ebcc5bc4789310b9	Bacteria	7.33137e-05	-1817.21	-1817.21	1	1	bASV48|Bacillus	Bacilli	Bacillales	Bacillaceae	Bacillus	NA	Sapindales	Acanthaceae	Brassaiopsis
bASV2416	ea806050df3e088f7001cc353b29a45f	Bacteria	7.33137e-05	-1678.38	-1678.38	1	1	bASV2416|uncultured_bacterium	MBNT15	MBNT15	MBNT15	MBNT15	NA	NA	Lamiaceae	Pterospermum
bASV2032	1864378e3b39867c5106554af26b621b	Bacteria	7.33137e-05	-1731.5	-1731.5	1	1	bASV2032|Gemmatimonas	Gemmatimonadetes	Gemmatimonadales	Gemmatimonadaceae	Gemmatimonas	NA	Arecales	Arecaceae	Dypsis
bASV2119	9ed77a85132aec264e4f49256140b9af	Bacteria	0.0415976	-1759.32	-1760.51	0.122759	0.371356	bASV2119|uncultured_bacterium	TK10	TK10	TK10	TK10	NA	Myrtales	Myrtaceae	Polyalthia
bASV1438	e68afd5e1c0db1f8fa5110938f15dbf8	Bacteria	0.0350744	-1747.65	-1748.6	0.169168	0.450048	bASV1438|Terriglobus_albidus	Acidobacteriae	Acidobacteriales	Acidobacteriaceae_(Subgroup_1)	Terriglobus	NA	Arecales	Zingiberaceae	Fagraea
bASV445	13b693f1d6edfa0b179b7902ff40cecc	Bacteria	0.0172765	-1740.67	-1741.24	0.284931	0.619799	bASV445|Pseudomonas	Gammaproteobacteria	Pseudomonadales	Pseudomonadaceae	Pseudomonas	NA	Asparagales	Acanthaceae	Pterospermum
bASV529	d020b1604ec1659c1b7b91434b287831	Bacteria	0.0560638	-1774.46	-1778.05	0.00734228	0.0691102	bASV529|Rhodoplanes	Alphaproteobacteria	Rhizobiales	Xanthobacteraceae	Rhodoplanes	NA	Rosales	Acanthaceae	Mycetia
bASV3785	5210285c310ca24238e4337090c67b8a	Bacteria	0.0605507	-1692.12	-1692.6	0.327925	0.690196	bASV3785|uncultured_bacterium	Phycisphaerae	Phycisphaerales	Phycisphaeraceae	SM1A02	NA	Arecales	Arecaceae	Fagraea
bASV284	948150105b3224f1bf2196a4ed280267	Bacteria	7.33137e-05	-1760.43	-1760.43	1	1	bASV284|Mycobacterium	Actinobacteria	Corynebacteriales	Mycobacteriaceae	Mycobacterium	NA	Gentianales	Lamiaceae	Horsfieldia
bASV2041	aae2c5b9423d27b7ce837c66e38c5b3c	Bacteria	0.0131007	-1726.67	-1726.69	0.83424	1	bASV2041|Pedosphaeraceae	Verrucomicrobiae	Pedosphaerales	Pedosphaeraceae		NA	Myrtales	Arecaceae	Fagraea
bASV1759	e7c510b9f0022019335407cff7990392	Bacteria	0.0691763	-1747.36	-1749.96	0.0226684	0.135369	bASV1759|Polyangiaceae	Polyangia	Polyangiales	Polyangiaceae		NA	NA	Araceae	Alocasia
bASV674	7d1ea5ecb8395fad18356fc9b95338a2	Bacteria	7.33137e-05	-1757.06	-1757.06	1	1	bASV674|Bacillus	Bacilli	Bacillales	Bacillaceae	Bacillus	NA	Arecales	Acanthaceae	Dypsis
bASV5554	570bd3420d0279acfb3b7efdad5ac862	Bacteria	0.0147145	-1609.6	-1609.66	0.736012	1	bASV5554|Chloroflexi_bacterium	TK10	TK10	TK10	TK10	NA	NA	NA	Mycetia
bASV141	86ab1ca07e39e24453fe8ab2af8e5b14	Bacteria	7.33137e-05	-1800.93	-1800.93	1	1	bASV141|Micrococcaceae	Actinobacteria	Micrococcales	Micrococcaceae		NA	Asparagales	NA	Bauhinia
bASV793	a41f82fbb47eda99a0cf36c267fc6016	Bacteria	0.0811552	-1731.13	-1735.86	0.00210357	0.0331263	bASV793|Variovorax	Gammaproteobacteria	Burkholderiales	Comamonadaceae	Variovorax	NA	Lamiales	Urticaceae	Bauhinia
bASV1224	a5a694ac3da0fac9cf71371b44eec90a	Bacteria	0.103051	-1772.54	-1774.95	0.0282528	0.154206	bASV1224|TK10	TK10	TK10	TK10	TK10	NA	Arecales	Myrtaceae	Dypsis
bASV706	451cdefde34db84c1cb34878a4bc79bf	Bacteria	0.0853803	-1726.74	-1730.55	0.00574957	0.0609117	bASV706|delta_proteobacterium					NA	Malpighiales	Urticaceae	Mycetia
bASV1701	437c1da8cd4252db3e2414444cd48312	Bacteria	0.114111	-1756.77	-1759.55	0.0184375	0.12063	bASV1701|Acidimicrobiia	Acidimicrobiia				NA	Lamiales	Acanthaceae	Fagraea
bASV333	67d8e599ffb0f0958990f6e2a2c33010	Bacteria	0.0679909	-1807.82	-1808.7	0.185877	0.476357	bASV333|Subgroup_2	Acidobacteriae	Subgroup_2	Subgroup_2	Subgroup_2	Others	Others	Urticaceae	Musa
bASV2406	e351a1d809be6a892feaf6f882b799dc	Bacteria	0.00943151	-1681.74	-1682.06	0.424857	0.823059	bASV2406|Reyranella	Alphaproteobacteria	Reyranellales	Reyranellaceae	Reyranella	NA	NA	NA	Fagraea
bASV1120	68a5d6b62841cf97e8f5b37219c1088a	Bacteria	7.33137e-05	-1732.85	-1732.85	1	1	bASV1120|Comamonadaceae	Gammaproteobacteria	Burkholderiales	Comamonadaceae		NA	NA	Asteraceae	Alocasia
bASV1425	a397afaeb844811d18869f46c28d4c98	Bacteria	7.33137e-05	-1740.72	-1740.72	1	1	bASV1425|uncultured_bacterium	Acidobacteriae	Acidobacteriales	Koribacteraceae	Candidatus_Koribacter	NA	Others	Poaceae	Lagerstroemia
bASV885	9aac5f8e6f692142a337f222a96c0a27	Bacteria	0.0753293	-1763.37	-1765.09	0.0636673	0.243513	bASV885|Phenylobacterium	Alphaproteobacteria	Caulobacterales	Caulobacteraceae	Phenylobacterium	Others	Myrtales	Araliaceae	Heptapleurum
bASV1943	188982c5e93a2f3887ccb3473be2f772	Bacteria	0.0275337	-1680.56	-1681.1	0.299751	0.646481	bASV1943|uncultured_bacterium	Alphaproteobacteria	Rhizobiales	D05-2	D05-2	NA	Rosales	Acanthaceae	Brassaiopsis
bASV2714	87ae1b2db4af2c6ea10caf1f250c92d3	Bacteria	0.20264	-1689.11	-1692.47	0.00958512	0.0800975	bASV2714|Alphaproteobacteria	Alphaproteobacteria				NA	Sapindales	Meliaceae	NA
bASV1778	ea7050e2c51fcee37ccdb6b66077d735	Bacteria	0.0352441	-1731.83	-1732.65	0.200355	0.500789	bASV1778|uncultured_bacterium	TK10	TK10	TK10	TK10	NA	Fabales	Fabaceae	Fagraea
bASV2225	3e850a57265189ce38e62bea788d916d	Bacteria	7.33137e-05	-1679.98	-1679.97	1	1	bASV2225|Comamonadaceae	Gammaproteobacteria	Burkholderiales	Comamonadaceae		NA	Asparagales	Asparagaceae	Mycetia
bASV6545	f715f258b853f04a0be5c43dfaa8ab70	Bacteria	7.33137e-05	-1627.13	-1627.13	1	1	bASV6545|Pedosphaeraceae	Verrucomicrobiae	Pedosphaerales	Pedosphaeraceae	Pedosphaeraceae	NA	NA	Urticaceae	NA
bASV2461	386c6f320a94d2c9e8d94d919d1c52d6	Bacteria	4.96987e-05	-1666.31	-1666.31	1	1	bASV2461|Ellin6067	Gammaproteobacteria	Burkholderiales	Nitrosomonadaceae	Ellin6067	NA	Myrtales	Asteraceae	Fagraea
bASV880	a7e93e4818a30cf13f94d00973dc8ebf	Bacteria	0.0448242	-1780.86	-1782.14	0.109338	0.346349	bASV880|uncultured_bacterium	Acidobacteriae	Bryobacterales	Bryobacteraceae	Bryobacter	NA	Lamiales	Myrtaceae	Brassaiopsis
bASV30	2cbbebec77e79fb10f461f716036a36d	Bacteria	0.00953277	-1824.47	-1824.69	0.507081	0.923025	bASV30|Acinetobacter	Gammaproteobacteria	Pseudomonadales	Moraxellaceae	Acinetobacter	NA	Arecales	Araliaceae	Pterospermum
bASV1108	d77c7b62b022fa52246d5e77b8f32336	Bacteria	0.00842663	-1712.58	-1712.63	0.743309	1	bASV1108|Rhizobiaceae	Alphaproteobacteria	Rhizobiales	Rhizobiaceae		NA	Lamiales	Acanthaceae	NA
bASV936	6cd96e93175d6ae7fd2fcd801965e7c9	Bacteria	0.0258467	-1780.32	-1781.4	0.141045	0.403976	bASV936|A0839	Alphaproteobacteria	Rhizobiales	A0839	A0839	NA	Rosales	Urticaceae	Mycetia
bASV2344	210997f8184376a17c0991f01faba840	Bacteria	0.0174463	-1689.16	-1689.43	0.470438	0.877143	bASV2344|Sphingomonas_oryziterrae	Alphaproteobacteria	Sphingomonadales	Sphingomonadaceae	Sphingomonas	NA	Asparagales	Myrtaceae	Pandanus
bASV2261	4ba4fc7f02dafed5e799b063cd22328a	Bacteria	0.0733686	-1683.75	-1685.93	0.0369246	0.175117	bASV2261|Nocardioides	Actinobacteria	Propionibacteriales	Nocardioidaceae	Nocardioides	NA	Myrtales	Myrtaceae	Fagraea
bASV1785	39b3a9ab39c0e4006af25715662c5ff2	Bacteria	0.151601	-1688.5	-1689.28	0.213088	0.517623	bASV1785|Candidatus_Solibacter	Acidobacteriae	Solibacterales	Solibacteraceae	Candidatus_Solibacter	NA	Malvales	Poaceae	Horsfieldia
bASV1439	c18b3cda498ef57646095661b303c44b	Bacteria	0.28483	-1714.13	-1719.32	0.00127589	0.0258445	bASV1439|Nocardioides	Actinobacteria	Propionibacteriales	Nocardioidaceae	Nocardioides	NA	Lamiales	Urticaceae	Excoecaria
bASV658	df3befb975895c933b29f7b1e0ebd8af	Bacteria	7.33137e-05	-1777.64	-1777.64	1	1	bASV658|uncultured_Truepera	Subgroup_5	Subgroup_5	Subgroup_5	Subgroup_5	NA	NA	Urticaceae	NA
bASV1566	8332868c4a29d9d19da212778c302929	Bacteria	0.0275361	-1747.4	-1748.12	0.229645	0.541902	bASV1566|KF-JG30-B3	Alphaproteobacteria	Rhizobiales	KF-JG30-B3	KF-JG30-B3	NA	Myrtales	Urticaceae	Terminalia
bASV1606	d9c0a6a9f6ad9e83ab2bf245381d7254	Bacteria	0.111699	-1724.65	-1725.25	0.273505	0.605705	bASV1606|uncultured_Holophaga	Acidobacteriae	Solibacterales	Solibacteraceae	Candidatus_Solibacter	Polypodiopsida	Others	Lamiaceae	Musa
bASV2282	bdac67c0206f5e9e64150a9d3b882f70	Bacteria	7.33137e-05	-1677.19	-1677.19	1	1	bASV2282|Mesorhizobium	Alphaproteobacteria	Rhizobiales	Rhizobiaceae	Mesorhizobium	NA	Arecales	Myrtaceae	Pandanus
bASV1832	166e87ce1cea3e7d2ed711850df38455	Bacteria	7.33137e-05	-1745.5	-1745.5	1	1	bASV1832|metagenome	MB-A2-108	MB-A2-108	MB-A2-108	MB-A2-108	NA	NA	Acanthaceae	Mycetia
bASV1925	e404dc0a3d848281c3b7bb12c609a332	Bacteria	0.113738	-1686.17	-1687.8	0.0709414	0.261616	bASV1925|uncultured_bacterium	TK10	TK10	TK10	TK10	NA	Malvales	Zingiberaceae	Fagraea
bASV3406	c2b3b9056c286b6c55ce73092ef9db89	Bacteria	0.0319621	-1643.5	-1645.39	0.0515806	0.213751	bASV3406|Clostridium_sensu_stricto_10	Clostridia	Clostridiales	Clostridiaceae	Clostridium_sensu_stricto_10	NA	Arecales	Phyllanthaceae	Dypsis
bASV2016	587d761883052b9dfd964d187a082346	Bacteria	0.0202782	-1716.79	-1717.52	0.22606	0.53594	bASV2016|Gaiellales	Thermoleophilia	Gaiellales			NA	Others	Acanthaceae	Pterospermum
bASV552	ab06b7da2c334bfe5f981af0da5d3d4e	Bacteria	7.33137e-05	-1740.89	-1740.89	1	1	bASV552|Acidibacter	Gammaproteobacteria	Gammaproteobacteria_Incertae_Sedis	Unknown_Family	Acidibacter	Pinopsida	NA	Poaceae	Podocarpus
bASV405	e974556177d776f3e579cf37a6b24b85	Bacteria	7.33137e-05	-1739.49	-1739.49	1	1	bASV405|Actinospica	Actinobacteria	Catenulisporales	Actinospicaceae	Actinospica	NA	Malpighiales	NA	Musa
bASV795	b7fcac9d16338e8574d5c5072f1e5091	Bacteria	7.33137e-05	-1763.02	-1763.02	1	1	bASV795|Gaiellales	Thermoleophilia	Gaiellales			Pinopsida	Others	Poaceae	Horsfieldia
bASV4563	3dea0e97249cd9f15a5a685a1a165743	Bacteria	0.175947	-1584.34	-1587.57	0.0109919	0.0870241	bASV4563|metagenome	Gammaproteobacteria	Pseudomonadales	Moraxellaceae		NA	Asparagales	Asparagaceae	Alocasia
bASV291	3d6c2691b9d84a0ef567935291fe6e77	Bacteria	0.129929	-1739.62	-1745.95	0.000372113	0.0125625	bASV291|uncultured_bacterium	Gammaproteobacteria	Gammaproteobacteria	Gammaproteobacteria	Gammaproteobacteria	NA	Lamiales	Acanthaceae	Alocasia
bASV571	1b8f5636996286fb95fec955a4311a9f	Bacteria	0.0508349	-1780.27	-1781.77	0.0829263	0.288816	bASV571|Micropepsaceae	Alphaproteobacteria	Micropepsales	Micropepsaceae		NA	Malvales	Poaceae	Duranta
bASV3380	eb4ffec7a905277af8f5c39fc588d7e4	Bacteria	7.33137e-05	-1677.5	-1677.49	1	1	bASV3380|Solirubrobacteraceae	Thermoleophilia	Solirubrobacterales	Solirubrobacteraceae		Others	Others	Poaceae	Lagerstroemia
bASV1287	750eeec6b434b6af5d2007492f55a5ee	Bacteria	7.33137e-05	-1731.64	-1731.64	1	1	bASV1287|metagenome	Acidobacteriae	Acidobacteriae	Acidobacteriae	Paludibaculum	NA	Arecales	Asteraceae	Bauhinia
bASV3794	a51e7ed60fc569188609e4065bb9e3d0	Bacteria	0.0039176	-1636.57	-1636.58	0.89267	1	bASV3794|uncultured_Chloroflexi	Armatimonadia	Armatimonadales	Armatimonadales	Armatimonadales	NA	Gentianales	Poaceae	Podocarpus
bASV2632	974c130d0c1f1b8c020416edce1e6804	Bacteria	7.33137e-05	-1700.38	-1700.38	1	1	bASV2632|metagenome	Acidimicrobiia	IMCC26256	IMCC26256	IMCC26256	NA	Arecales	Acanthaceae	Mycetia
bASV87	ac27ee63cd1c4af74b79080a8f871c4e	Bacteria	7.33137e-05	-1793.4	-1793.39	1	1	bASV87|Allorhizobium-Neorhizobium-Pararhizobium-Rhizobium	Alphaproteobacteria	Rhizobiales	Rhizobiaceae	Allorhizobium-Neorhizobium-Pararhizobium-Rhizobium	NA	NA	NA	Brassaiopsis
bASV1304	09550079a5a178266ba8af39a7b43a13	Bacteria	7.33137e-05	-1764.01	-1764.01	1	1	bASV1304|uncultured_Rhodospirillaceae	Alphaproteobacteria	Dongiales	Dongiaceae	Dongia	Polypodiopsida	NA	NA	Lagerstroemia
bASV846	22587f70df4e0aeb4bf9dc105ad3fcb2	Bacteria	0.116942	-1713.99	-1716.31	0.0312793	0.162293	bASV846|uncultured_bacterium	Polyangia	Nannocystales	Nannocystaceae	Pseudenhygromyxa	NA	Sapindales	Urticaceae	Alocasia
bASV283	fbfab7baeca73fec8e347d61480fbc6d	Bacteria	0.0116638	-1820.63	-1820.69	0.736597	1	bASV283|Reyranella	Alphaproteobacteria	Reyranellales	Reyranellaceae	Reyranella	Polypodiopsida	Others	Zingiberaceae	Horsfieldia
bASV2158	5f32eda82429a4461e297741f204f33c	Bacteria	0.318106	-1739.85	-1745.07	0.00123562	0.0256441	bASV2158|Candidatus_Solibacter	Acidobacteriae	Solibacterales	Solibacteraceae	Candidatus_Solibacter	Polypodiopsida	Lamiales	Urticaceae	Mycetia
bASV14	0afc3bbe6d15d90f828602bd3bc00f68	Bacteria	0.00535361	-1803.27	-1803.3	0.810419	1	bASV14|Acinetobacter	Gammaproteobacteria	Pseudomonadales	Moraxellaceae	Acinetobacter	NA	Asparagales	Acanthaceae	Pterospermum
bASV1501	7043456dc73ba1139f47d3e122a57f60	Bacteria	0.0364919	-1762.34	-1763.32	0.162887	0.441574	bASV1501|uncultured_bacterium	Gammaproteobacteria	Cellvibrionales	Halieaceae	OM60(NOR5)_clade	NA	Arecales	Myrtaceae	Alocasia
bASV1698	28e31f9cc8583b4e0edfeafa46a3a0dc	Bacteria	7.33137e-05	-1735.52	-1735.52	1	1	bASV1698|RCP2-54	RCP2-54	RCP2-54	RCP2-54	RCP2-54	NA	NA	NA	Mycetia
bASV2242	0141f50546aac03edd038d572e0e04d4	Bacteria	0.193318	-1687.27	-1691.37	0.00422679	0.0495474	bASV2242|Micromonospora	Actinobacteria	Micromonosporales	Micromonosporaceae	Micromonospora	NA	Arecales	Phyllanthaceae	Begonia
bASV1734	ddfc532bbaeec1ee717c61d995bbc333	Bacteria	0.00741478	-1744.09	-1744.12	0.820066	1	bASV1734|Phaselicystis	Polyangia	Polyangiales	Phaselicystidaceae	Phaselicystis	NA	NA	Moraceae	Fagraea
bASV661	d7ce04254ab447a5a1dd42627449a819	Bacteria	7.33137e-05	-1727.24	-1727.23	1	1	bASV661|Blastomonas_natatoria	Alphaproteobacteria	Sphingomonadales	Sphingomonadaceae	Blastomonas	NA	NA	NA	Terminalia
bASV3873	5caad39bec4c5e481cc0b63cbacbe8c1	Bacteria	7.33137e-05	-1691.58	-1691.58	1	1	bASV3873|Bryobacter	Acidobacteriae	Bryobacterales	Bryobacteraceae	Bryobacter	NA	Myrtales	Myrtaceae	Brassaiopsis
bASV5828	524274554ed9b2306fd894adfe93ec95	Bacteria	7.33137e-05	-1651.94	-1651.94	1	1	bASV5828|Bryobacter	Acidobacteriae	Bryobacterales	Bryobacteraceae	Bryobacter	NA	NA	Urticaceae	NA
bASV2325	eaacf625519cc3cdfc3eca747ac01f03	Bacteria	7.33137e-05	-1692.23	-1692.22	1	1	bASV2325|Ramlibacter	Gammaproteobacteria	Burkholderiales	Comamonadaceae	Ramlibacter	NA	NA	Apocynaceae	Alocasia
bASV4458	e8f3e3f6aa2bf96958c935b162a644ee	Bacteria	0.0288458	-1689.74	-1690.35	0.272975	0.605705	bASV4458|uncultured_Acetobacteraceae	Alphaproteobacteria				NA	NA	Myrtaceae	Brassaiopsis
bASV5163	1f273d79e012d5483d5eed7024e8df62	Bacteria	7.33137e-05	-1672.5	-1672.5	1	1	bASV5163|Bacillus	Bacilli	Bacillales	Bacillaceae	Bacillus	Others	Asparagales	Araceae	Fagraea
bASV4180	a7a1475689d25d667eb3ce3afacf49df	Bacteria	0.010959	-1617.62	-1617.96	0.409899	0.80006	bASV4180|Microtrichales	Acidimicrobiia	Microtrichales			NA	Rosales	Araceae	Fagraea
bASV4731	a904f5cb5faa2a7429f9a0bddaa54665	Bacteria	0.015979	-1662.04	-1662.37	0.410141	0.80006	bASV4731|OM60(NOR5)_clade	Gammaproteobacteria	Cellvibrionales	Halieaceae	OM60(NOR5)_clade	NA	Arecales	Myrtaceae	Alocasia
bASV2082	ee038399ddfaedc5d29902d64a1ceed8	Bacteria	0.00457475	-1694.35	-1694.43	0.697474	1	bASV2082|WD260	Gammaproteobacteria	WD260	WD260	WD260	NA	Malvales	Poaceae	Horsfieldia
bASV4663	0add3dabbc9838aff15156d0e299df32	Bacteria	0.0407191	-1552.67	-1555.63	0.0150167	0.105341	bASV4663|Solirubrobacterales_bacterium	Thermoleophilia	Solirubrobacterales	67-14	67-14	NA	Rosales	Moraceae	Fagraea
bASV2718	515cbe0733995f2deb81607c7811c059	Bacteria	0.0391891	-1728.16	-1729.61	0.0879883	0.299042	bASV2718|metagenome	Alphaproteobacteria	Rhizobiales	D05-2	D05-2	NA	Asparagales	Myrtaceae	Alocasia
bASV389	800ed8dd260b2ef770176f1d0b93932d	Bacteria	0.0570335	-1812.73	-1813.47	0.221527	0.529657	bASV389|Gaiella	Thermoleophilia	Gaiellales	Gaiellaceae	Gaiella	Magnoliopsida	Rosales	Myrtaceae	Brassaiopsis
bASV723	0fd358575a519d273492a7b297e69627	Bacteria	0.0776339	-1783.89	-1785.22	0.104127	0.333734	bASV723|Gaiellales	Thermoleophilia	Gaiellales			NA	Arecales	Arecaceae	Dypsis
bASV1846	cadb068c640c4bc561d38af384a25a44	Bacteria	0.243826	-1702.37	-1707.4	0.00151928	0.0278013	bASV1846|mle1-7	Gammaproteobacteria	Burkholderiales	Nitrosomonadaceae	mle1-7	NA	Arecales	Urticaceae	Dypsis
bASV243	319b65dc3bc4c4275878e02a903d9bbb	Bacteria	0.0174788	-1790.35	-1790.78	0.353863	0.72549	bASV243|Shinella	Alphaproteobacteria	Rhizobiales	Rhizobiaceae	Shinella	NA	Myrtales	Myrtaceae	Brassaiopsis
bASV1796	3ad9bda4b8fcac383a49c12d2c9a2a13	Bacteria	7.33137e-05	-1722.82	-1722.81	1	1	bASV1796|Myxococcaceae	Myxococcia	Myxococcales	Myxococcaceae		NA	NA	Arecaceae	Brassaiopsis
bASV3399	6b947d72732fa2bd6ca7331e3b0b24da	Bacteria	0.142658	-1684.4	-1685.6	0.121605	0.369631	bASV3399|metagenome	Acidobacteriae	Bryobacterales	Bryobacteraceae	Bryobacter	NA	Lamiales	Urticaceae	Mycetia
bASV4226	aadcd610b6cc8af15735577b1544b554	Bacteria	0.0165644	-1638.29	-1638.43	0.596802	1	bASV4226|uncultured_Rubrobacteria	Thermoleophilia	Gaiellales	Gaiellaceae	Gaiella	Polypodiopsida	Arecales	Urticaceae	Begonia
bASV66	1187bf22225ae2a49f565860ff339872	Bacteria	0.0618034	-1730.07	-1731.14	0.144246	0.410835	bASV66|Allorhizobium-Neorhizobium-Pararhizobium-Rhizobium	Alphaproteobacteria	Rhizobiales	Rhizobiaceae	Allorhizobium-Neorhizobium-Pararhizobium-Rhizobium	NA	Asparagales	Araliaceae	Bauhinia
bASV1572	641b5678a07062b17ff1b45a015ca7ee	Bacteria	0.040371	-1746.99	-1747.89	0.179677	0.464805	bASV1572|Gemmatimonadaceae	Gemmatimonadetes	Gemmatimonadales	Gemmatimonadaceae		NA	Arecales	Arecaceae	NA
bASV218	416e09b45f3a2c92a559dc0dba910dac	Bacteria	0.0403189	-1766.24	-1767.7	0.0873394	0.298137	bASV218|Micropepsaceae	Alphaproteobacteria	Micropepsales	Micropepsaceae		NA	NA	Myrtaceae	NA
bASV2949	6f7261c12b4f06e79fc487eeebfeaf3a	Bacteria	7.33137e-05	-1651.75	-1651.75	1	1	bASV2949|Puia	Bacteroidia	Chitinophagales	Chitinophagaceae	Puia	NA	Arecales	Acanthaceae	Pterospermum
bASV996	f0fdeae02572ca2cfad910e741720caf	Bacteria	7.33137e-05	-1754.35	-1754.34	1	1	bASV996|Allorhizobium-Neorhizobium-Pararhizobium-Rhizobium	Alphaproteobacteria	Rhizobiales	Rhizobiaceae	Allorhizobium-Neorhizobium-Pararhizobium-Rhizobium	Others	Others	Zingiberaceae	Horsfieldia
bASV258	efbdc5e189c9b9f6d7a5e7d3e078f645	Bacteria	0.113812	-1684.67	-1689.76	0.00141745	0.0276076	bASV258|Lactococcus_garvieae	Bacilli	Lactobacillales	Streptococcaceae	Lactococcus	NA	NA	Asteraceae	Fagraea
bASV80	e01323ac6aed9c3c34eec3e69cc3b17a	Bacteria	0.072664	-1619.68	-1621.12	0.0906581	0.305248	bASV80|uncultured_soil	Nitrospiria	Nitrospirales	Nitrospiraceae	Nitrospira	NA	NA	Myrtaceae	Pandanus
bASV1107	c13802f2b7b3c0d35ad33834cfb9bd78	Bacteria	0.022303	-1761.67	-1761.89	0.502926	0.916142	bASV1107|Geobacteraceae	Desulfuromonadia	Geobacterales	Geobacteraceae		NA	Arecales	Phyllanthaceae	Dypsis
bASV1359	e5eef62d5ae51d3d938b448e8d55259a	Bacteria	0.510983	-1678.69	-1694.37	2.14445e-08	1.80992e-05	bASV1359|uncultured_actinobacterium	MB-A2-108	MB-A2-108	MB-A2-108	MB-A2-108	Polypodiopsida	Arecales	Urticaceae	Dypsis
bASV147	f8ab00bbd0561ea4ace34f65370d7b8f	Bacteria	0.21114	-1831.3	-1834.25	0.0150191	0.105341	bASV147|Xanthobacteraceae	Alphaproteobacteria	Rhizobiales	Xanthobacteraceae		NA	Sapindales	Meliaceae	NA
bASV119	1c733c4c93855e608da77b2bb0f78e0e	Bacteria	7.33137e-05	-1750.41	-1750.41	1	1	bASV119|Sutterellaceae	Gammaproteobacteria	Burkholderiales	Sutterellaceae		NA	Arecales	Myrtaceae	Alocasia
bASV1898	5f7ff1e8aa5eba014ec737fa101021d6	Bacteria	7.33137e-05	-1727.61	-1727.61	1	1	bASV1898|uncultured_Alphaproteobacteria	Alphaproteobacteria	Elsterales			Others	Others	Poaceae	Musa
bASV1526	a875f714b4103194c129de3b84d1109f	Bacteria	0.104097	-1753.2	-1758.7	0.000905014	0.0220336	bASV1526|uncultured_bacterium	Gammaproteobacteria	R7C24	R7C24	R7C24	NA	Arecales	Myrtaceae	Alocasia
bASV1229	27a9c06a6074042466fc0eed4bedf1be	Bacteria	0.00183127	-1682.74	-1682.75	0.874067	1	bASV1229|Paenibacillus	Bacilli	Paenibacillales	Paenibacillaceae	Paenibacillus	NA	Asparagales	Urticaceae	Horsfieldia
bASV11	2469c70f2fb0f1d1da6cc90dbc0f4121	Bacteria	0.0261607	-1790.35	-1791.46	0.135825	0.395216	bASV11|Acinetobacter	Gammaproteobacteria	Pseudomonadales	Moraxellaceae	Acinetobacter	NA	Lamiales	Araliaceae	Pterospermum
bASV821	098821f451b903079d4ca8701f3f4a5a	Bacteria	0.160514	-1766.27	-1767.43	0.128358	0.380121	bASV821|metagenome	Rubrobacteria	Rubrobacterales	Rubrobacteriaceae	Rubrobacter	NA	Sapindales	Meliaceae	NA
bASV2232	54829f8890661f2bacf0d4a36478c009	Bacteria	7.33137e-05	-1634.74	-1634.74	1	1	bASV2232|Saccharimonadales	Saccharimonadia	Saccharimonadales			NA	Arecales	NA	Fagraea
bASV382	bca08c08ebe46d7cc85e7f657bc70c1f	Bacteria	0.0252829	-1796.82	-1796.95	0.606682	1	bASV382|uncultured_Acidimicrobiia	Thermoleophilia	Gaiellales	Gaiellaceae	Gaiella	NA	Lamiales	Meliaceae	Alocasia
bASV2454	e3662f9a6bbcecd7d47bafd1fc24980f	Bacteria	0.313502	-1711.78	-1718.42	0.000267516	0.0104563	bASV2454|Subgroup_10	Thermoanaerobaculia	Thermoanaerobaculales	Thermoanaerobaculaceae	Subgroup_10	NA	Lamiales	Urticaceae	Mycetia
bASV824	bba6492d110c093e3065e3b58f09baf2	Bacteria	0.0144217	-1793.02	-1793.12	0.650309	1	bASV824|uncultured_bacterium	Alphaproteobacteria	Rhizobiales	Hyphomicrobiaceae	Pedomicrobium	NA	Rosales	Myrtaceae	Dalbergia
bASV1241	b4e27cb409a4ed77a911c98d150ef825	Bacteria	0.195557	-1749.34	-1751.55	0.0353792	0.172485	bASV1241|uncultured_bacterium	Verrucomicrobiae	Pedosphaerales	Pedosphaeraceae	ADurb.Bin063-1	Polypodiopsida	Arecales	Zingiberaceae	Pterospermum
bASV609	ae6c21121f1a346ca837d92abb30d255	Bacteria	0.0419557	-1769.91	-1771.26	0.101044	0.328005	bASV609|Gaiellales	Thermoleophilia	Gaiellales			NA	Lamiales	Urticaceae	Mycetia
bASV1926	d1d3e2bbb659044738cc412dcb810d0c	Bacteria	7.33137e-05	-1717.62	-1717.62	1	1	bASV1926|Alphaproteobacteria	Alphaproteobacteria				Polypodiopsida	Malvales	Lauraceae	NA
bASV622	a33702a7405c400b2fce1405220d7bbc	Bacteria	0.12685	-1804.64	-1808.7	0.00437384	0.0508008	bASV622|Microvirga	Alphaproteobacteria	Rhizobiales	Beijerinckiaceae	Microvirga	NA	Myrtales	Myrtaceae	Pandanus
bASV2147	ccc619275511629a18619d4f080e2d39	Bacteria	0.0281864	-1689.41	-1690.26	0.192372	0.487573	bASV2147|uncultured_bacterium	Bacteroidia	Chitinophagales	Chitinophagaceae	Parafilimonas	NA	Asparagales	Asparagaceae	Fagraea
bASV2338	1235e442359a67cf9a3b320e9b9cf2f5	Bacteria	0.217525	-1686.32	-1686.29	1	1	bASV2338|Xanthobacteraceae	Alphaproteobacteria	Rhizobiales	Xanthobacteraceae		NA	Malvales	NA	Musa
bASV1002	43a740f0f335d9c44e38e67ac7d3c7e2	Bacteria	0.0177314	-1706.62	-1706.89	0.466318	0.876278	bASV1002|Polyangiaceae	Polyangia	Polyangiales	Polyangiaceae		NA	Arecales	Arecaceae	Dypsis
bASV3290	2a338df3d256010a3f08fb3595a3eae1	Bacteria	0.144053	-1699.33	-1703.53	0.00375945	0.0466188	bASV3290|Bryobacter	Acidobacteriae	Bryobacterales	Bryobacteraceae	Bryobacter	NA	NA	Lamiaceae	Dypsis
bASV242	abb47a96712d10be41f6f3246eb56cb1	Bacteria	0.0322972	-1828.77	-1829.06	0.446817	0.853842	bASV242|uncultured_bacterium	Alphaproteobacteria	Rhizobiales	Beijerinckiaceae	Roseiarcus	Polypodiopsida	Others	Lamiaceae	Horsfieldia
bASV3117	3ea77dc1614067f21d2a7c619976a90a	Bacteria	0.00768237	-1737.78	-1737.86	0.693764	1	bASV3117|Gemmatimonas	Gemmatimonadetes	Gemmatimonadales	Gemmatimonadaceae	Gemmatimonas	Polypodiopsida	Arecales	Urticaceae	Musa
bASV99	baac04f036bc79c78a2999124bed56b9	Bacteria	0.0289925	-1718.63	-1719.49	0.188671	0.481566	bASV99|Rhodoplanes	Alphaproteobacteria	Rhizobiales	Xanthobacteraceae	Rhodoplanes	NA	NA	Meliaceae	Musa
bASV2991	b54ca34871f86b8b7162ab3f80839f6a	Bacteria	0.224226	-1692.99	-1695.08	0.041106	0.185954	bASV2991|uncultured_beta	Gammaproteobacteria	Burkholderiales	Nitrosomonadaceae	mle1-7	NA	NA	Urticaceae	Begonia
bASV1941	0839c80537431ee73ee1dcf18bedb569	Bacteria	0.0343589	-1757.88	-1757.96	0.678551	1	bASV1941|MB-A2-108	MB-A2-108	MB-A2-108	MB-A2-108	MB-A2-108	NA	Arecales	Meliaceae	Fagraea
bASV4312	79dab83b71c890a16b2b56adcfd10c31	Bacteria	7.33137e-05	-1659.48	-1659.48	1	1	bASV4312|Acidobacteriota					NA	NA	NA	Bauhinia
bASV1717	3de28ff81d05789d65654bb4ee550ab7	Bacteria	0.0615536	-1677.51	-1679.68	0.0371295	0.17557	bASV1717|Novosphingobium	Alphaproteobacteria	Sphingomonadales	Sphingomonadaceae	Novosphingobium	NA	Myrtales	Asteraceae	Duranta
bASV1170	1a51f003a27406d41b817342923f1319	Bacteria	0.0169452	-1707.75	-1707.86	0.633121	1	bASV1170|uncultured_Sphingomonadaceae	Alphaproteobacteria	Sphingomonadales	Sphingomonadaceae	Sphingomonas	NA	Myrtales	Myrtaceae	Codiaeum
bASV4823	5b12af3ab63e36770ad60562517efea6	Bacteria	7.33137e-05	-1639.65	-1639.64	1	1	bASV4823|metagenome	Dehalococcoidia	S085	S085	S085	Others	Arecales	Zingiberaceae	Musa
bASV826	83c5ce11180957d3b3bff2367c1266f0	Bacteria	7.33137e-05	-1769.1	-1769.1	1	1	bASV826|Streptacidiphilus	Actinobacteria	Streptomycetales	Streptomycetaceae	Streptacidiphilus	Others	Others	Poaceae	Horsfieldia
bASV4501	8e45ea507b1d96364c38f7ce02515072	Bacteria	7.33137e-05	-1655.43	-1655.42	1	1	bASV4501|uncultured_organism	Actinobacteria	Frankiales	Nakamurellaceae	Nakamurella	NA	Gentianales	Acanthaceae	Fagraea
bASV732	7c3f7911e545f1ca442439b940b80bc4	Bacteria	0.0250996	-1729.14	-1729.86	0.230063	0.542383	bASV732|uncultured_bacterium	RCP2-54	RCP2-54	RCP2-54	RCP2-54	NA	NA	Lamiaceae	Fagraea
bASV2996	af2832763070fa87b2ef1bb6148db421	Bacteria	7.33137e-05	-1621.26	-1621.25	1	1	bASV2996|uncultured_bacterium	Acidimicrobiia	Microtrichales	Microtrichaceae		NA	NA	NA	Bauhinia
bASV2131	b86542a3e09f41853c8853dbdf49df86	Bacteria	0.0541645	-1698.16	-1698.95	0.206896	0.508604	bASV2131|mle1-7	Gammaproteobacteria	Burkholderiales	Nitrosomonadaceae	mle1-7	NA	Myrtales	Myrtaceae	Syzygium
bASV1473	54516992c85ea68a35a91be1d5088799	Bacteria	7.33137e-05	-1727.83	-1727.82	1	1	bASV1473|uncultured_bacterium	Actinobacteria	Frankiales	Sporichthyaceae		NA	NA	NA	Musa
bASV768	e162cc9de214b049507a92bf65f5a38c	Bacteria	0.0456159	-1796	-1796.27	0.466864	0.876278	bASV768|Steroidobacter	Gammaproteobacteria	Steroidobacterales	Steroidobacteraceae	Steroidobacter	NA	Arecales	Myrtaceae	Codiaeum
bASV95	2562c9bdf1326226b91be1c8a8bbf60d	Bacteria	0.0338433	-1625.94	-1626.25	0.425958	0.82393	bASV95|Xanthobacteraceae	Alphaproteobacteria	Rhizobiales	Xanthobacteraceae		Magnoliopsida	Lamiales	Myrtaceae	Alocasia
bASV3253	367131bcc4384abee2507b1dacf29429	Bacteria	7.33137e-05	-1716.56	-1716.55	1	1	bASV3253|Rhizobiales	Alphaproteobacteria	Rhizobiales			NA	Malpighiales	NA	NA
bASV2053	71009a157988dbd340aeed3c8cb5502d	Bacteria	7.33137e-05	-1693.09	-1693.08	1	1	bASV2053|metagenome	Alphaproteobacteria	Rhizobiales	Rhizobiaceae	Mesorhizobium	NA	NA	NA	NA
bASV1278	45e5a76b10436831f38c6455a7fdee5a	Bacteria	0.00321431	-1640.45	-1640.5	0.75895	1	bASV1278|Novosphingobium	Alphaproteobacteria	Sphingomonadales	Sphingomonadaceae	Novosphingobium	NA	Asparagales	Myrtaceae	Fagraea
bASV1053	81bdbeacd81571ea1418f85c9acd3bdb	Bacteria	7.33137e-05	-1752.05	-1752.05	1	1	bASV1053|uncultured_Acidimicrobiia	Acidimicrobiia	IMCC26256	IMCC26256	IMCC26256	NA	NA	Asparagaceae	Pandanus
bASV133	d8f93b723db695118a0be5f2fa2b1c4d	Bacteria	0.0735692	-1726.75	-1728.33	0.0754279	0.271669	bASV133|Pseudorhodoplanes	Alphaproteobacteria	Rhizobiales	Xanthobacteraceae	Pseudorhodoplanes	Magnoliopsida	Lamiales	Myrtaceae	Alocasia
bASV4323	1ef2f522dcd7a6de4a5525ae4cc47f26	Bacteria	0.132884	-1649.84	-1651.66	0.0562357	0.227519	bASV4323|planctomycete_A-2	OM190	OM190	OM190	OM190	NA	NA	Meliaceae	Alocasia
bASV1684	6c2f1945b046f50eef81ddb61a23f62a	Bacteria	7.33137e-05	-1683.07	-1683.07	1	1	bASV1684|uncultured_soil	Babeliae	Babeliales	Vermiphilaceae	Vermiphilaceae	NA	Arecales	Phyllanthaceae	Duranta
bASV6535	2769a7345f86a5d7bc1c6161fbc2bb34	Bacteria	0.0604937	-1604.89	-1605.83	0.169739	0.450048	bASV6535|uncultured_bacterium	Chloroflexia	Chloroflexales	Herpetosiphonaceae	Herpetosiphon	NA	Myrtales	Myrtaceae	Brassaiopsis
bASV169	f3902353733114e9bb8e4471593a538f	Bacteria	7.33137e-05	-1759.26	-1759.26	1	1	bASV169|Bacillus	Bacilli	Bacillales	Bacillaceae	Bacillus	NA	NA	Myrtaceae	Brassaiopsis
bASV2582	708cbbac936590b7b654a53964cf388e	Bacteria	0.0895744	-1655.43	-1657.66	0.0346736	0.171337	bASV2582|Citrifermentans	Desulfuromonadia	Geobacterales	Geobacteraceae	Citrifermentans	NA	Malvales	Zingiberaceae	NA
bASV324	d17370dab921face30b10af52dc13c46	Bacteria	0.0249782	-1826.76	-1826.87	0.639793	1	bASV324|uncultured_gamma	Gammaproteobacteria	Gammaproteobacteria_Incertae_Sedis	Unknown_Family	Acidibacter	Polypodiopsida	Others	Zingiberaceae	Musa
bASV2448	f8d86577e9acc0398e988ca1da4b366b	Bacteria	0.00766865	-1707.49	-1707.6	0.640038	1	bASV2448|SC-I-84	Gammaproteobacteria	Burkholderiales	SC-I-84	SC-I-84	NA	Arecales	Arecaceae	Pterospermum
bASV2007	1b27a6e480a641ec72ce44a293f66f84	Bacteria	0.0632582	-1693.16	-1696.11	0.0151634	0.10606	bASV2007|uncultured_bacterium	Kryptonia	Kryptoniales	BSV26	BSV26	NA	Myrtales	Myrtaceae	Syzygium
bASV1553	57d707c0901eb684af3a9fd085a6ac08	Bacteria	0.0375691	-1675.94	-1676.07	0.612989	1	bASV1553|uncultured_bacterium	Polyangia	Polyangiales	Sandaracinaceae		NA	NA	NA	Pterospermum
bASV2327	2b5a439724b724c1abe08865dc8a82a1	Bacteria	0.210906	-1703.61	-1709.1	0.00091933	0.022169	bASV2327|metagenome	Acidobacteriae	Acidobacteriae	Acidobacteriae	Paludibaculum	NA	Arecales	Urticaceae	Mycetia
bASV671	9f968c78155aeee1f83ab6150c1d0f8f	Bacteria	0.271656	-1726.42	-1732.14	0.000717319	0.0193218	bASV671|uncultured_bacterium	AD3	AD3	AD3	AD3	Others	Arecales	Zingiberaceae	Musa
bASV299	117699e2125872c4ff8ea5bdb034a5d6	Bacteria	0.0832354	-1796.43	-1798.96	0.0244655	0.141348	bASV299|Rhizobiaceae	Alphaproteobacteria	Rhizobiales	Rhizobiaceae		NA	Arecales	Urticaceae	Clerodendrum
bASV1911	53741d24566f9660f3e73be6dc5d2af2	Bacteria	7.33137e-05	-1660.67	-1660.67	1	1	bASV1911|Gemmatimonadaceae	Gemmatimonadetes	Gemmatimonadales	Gemmatimonadaceae		NA	NA	Myrtaceae	NA
bASV1668	3d5ebbb726319586b359b1c248708dfa	Bacteria	0.0661475	-1734.56	-1737.03	0.0260804	0.145774	bASV1668|Aeromicrobium	Actinobacteria	Propionibacteriales	Nocardioidaceae	Aeromicrobium	NA	Rosales	Asteraceae	Alocasia
bASV1513	de171248460a1bc242d62f05ec8ed022	Bacteria	0.00979759	-1621.48	-1621.72	0.491877	0.902663	bASV1513|Cupriavidus	Gammaproteobacteria	Burkholderiales	Burkholderiaceae	Cupriavidus	Polypodiopsida	Gentianales	Acanthaceae	Fagraea
bASV39	eae0667baccbe70ad263a652b5ed6628	Bacteria	0.0217144	-1674.21	-1675.01	0.204695	0.506141	bASV39|Cupriavidus	Gammaproteobacteria	Burkholderiales	Burkholderiaceae	Cupriavidus	Others	Asparagales	Araliaceae	Brassaiopsis
bASV1452	32f96f3ba5eb7c158088d38460d2a6a3	Bacteria	0.0128348	-1706.79	-1707.14	0.406167	0.795987	bASV1452|Rhizobacter	Gammaproteobacteria	Burkholderiales	Comamonadaceae	Rhizobacter	NA	Fabales	Euphorbiaceae	NA
bASV2831	7951ed99d441b114bb565d389c32985d	Bacteria	0.262913	-1657.08	-1660.29	0.0113966	0.088788	bASV2831|uncultured_bacterium	Alphaproteobacteria	Rhizobiales	Rhizobiales_Incertae_Sedis		NA	NA	Urticaceae	Mycetia
bASV305	acae43f7a5c82581ef878c053df75d7f	Bacteria	0.0618923	-1789.91	-1791.7	0.0584074	0.232162	bASV305|Xanthobacteraceae	Alphaproteobacteria	Rhizobiales	Xanthobacteraceae		Others	Arecales	Lamiaceae	Musa
bASV4065	838028c43f2ff0c71ab0b84d5985a179	Bacteria	0.00675274	-1645.28	-1645.41	0.607463	1	bASV4065|Chloroflexi					NA	NA	NA	Caryota
bASV848	96adfa74d4ed58e3baf1ea54034bffb9	Bacteria	0.134691	-1783.5	-1787.79	0.00340202	0.0442878	bASV848|uncultured_bacterium	Alphaproteobacteria	Caulobacterales	Hyphomonadaceae	SWB02	Polypodiopsida	Arecales	Urticaceae	Dypsis
bASV1901	5e324848c238a9e7f82c9532499f84f5	Bacteria	7.33137e-05	-1705.17	-1705.17	1	1	bASV1901|uncultured_beta	Gammaproteobacteria	Burkholderiales	Nitrosomonadaceae	mle1-7	NA	Arecales	Arecaceae	Dypsis
bASV4002	a6b6a54cc9f9375b20c78d925e470709	Bacteria	0.0543548	-1687.44	-1688.97	0.0811493	0.284979	bASV4002|Clostridium_sensu_stricto_8	Clostridia	Clostridiales	Clostridiaceae	Clostridium_sensu_stricto_8	NA	Arecales	Myrtaceae	Dypsis
bASV27	08a33b20ec09574c80165bf7c80a3100	Bacteria	7.33137e-05	-1322.23	-1322.23	1	1	bASV27|Mycobacterium	Actinobacteria	Corynebacteriales	Mycobacteriaceae	Mycobacterium	NA	Fabales	Lamiaceae	Fagraea
bASV801	7e30159cb3a805a3968437cc80c77c94	Bacteria	0.11962	-1739.98	-1743.38	0.00916316	0.0794559	bASV801|Bacillus	Bacilli	Bacillales	Bacillaceae	Bacillus	NA	Arecales	Acanthaceae	Brassaiopsis
bASV703	6d9def9af3413e72f36151091fecba96	Bacteria	0.105053	-1783.09	-1785.07	0.0462375	0.19887	bASV703|Novosphingobium	Alphaproteobacteria	Sphingomonadales	Sphingomonadaceae	Novosphingobium	Others	Myrtales	Lamiaceae	Duranta
bASV655	92295c8766db7fd0a6bbaec36784461a	Bacteria	0.0848916	-1786.02	-1785.69	1	1	bASV655|Acidimicrobiia	Acidimicrobiia				NA	NA	Zingiberaceae	Fagraea
bASV1986	ed2fe095d8ed1486924c80cf59628cb6	Bacteria	0.0166766	-1687	-1687.38	0.382517	0.763486	bASV1986|MB-A2-108	MB-A2-108	MB-A2-108	MB-A2-108	MB-A2-108	NA	Arecales	Myrtaceae	Pandanus
bASV105	558bd13a7b4755e799c83a6f9f3295b3	Bacteria	7.33137e-05	-1784.76	-1784.76	1	1	bASV105|Dyella	Gammaproteobacteria	Xanthomonadales	Rhodanobacteraceae	Dyella	Others	Asparagales	Poaceae	Heptapleurum
bASV772	12ad468c6385f54b82500c1477601ac2	Bacteria	0.0788182	-1782.38	-1784.19	0.056982	0.229013	bASV772|mle1-7	Gammaproteobacteria	Burkholderiales	Nitrosomonadaceae	mle1-7	Polypodiopsida	Arecales	Arecaceae	Musa
bASV156	304cb787732db7709ee134288b948136	Bacteria	0.12589	-1757.45	-1759.38	0.0498274	0.208879	bASV156|uncultured_Alphaproteobacteria	Alphaproteobacteria	Rhizobiales	Xanthobacteraceae	Rhodoplanes	NA	Lamiales	Araceae	Mycetia
bASV332	c0e43bbb267e9c6ebff640048fd5ab1e	Bacteria	0.0277022	-1711.74	-1712.25	0.31644	0.673012	bASV332|Pseudorhodoplanes	Alphaproteobacteria	Rhizobiales	Xanthobacteraceae	Pseudorhodoplanes	NA	Arecales	Arecaceae	Brassaiopsis
bASV819	81892dc20c8d146ced5b900f02ccc352	Bacteria	0.0706815	-1785.27	-1786.74	0.0867594	0.29726	bASV819|Saprospiraceae	Bacteroidia	Chitinophagales	Saprospiraceae		NA	Arecales	Urticaceae	Mycetia
bASV102	25015981c57615985b456bbc751425d0	Bacteria	0.0519402	-1809.84	-1810.31	0.332552	0.695886	bASV102|Burkholderia-Caballeronia-Paraburkholderia	Gammaproteobacteria	Burkholderiales	Burkholderiaceae	Burkholderia-Caballeronia-Paraburkholderia	Others	Asparagales	Zingiberaceae	Musa
bASV1092	43244700d893bb2043be4b45f2857c5b	Bacteria	7.33137e-05	-1744.07	-1744.07	1	1	bASV1092|Enterobacteriaceae	Gammaproteobacteria	Enterobacterales	Enterobacteriaceae		NA	NA	Asparagaceae	Polyalthia
bASV196	70cf1637b3db9f6f4b79c435270a900a	Bacteria	0.172404	-1818.91	-1821.28	0.0297068	0.158203	bASV196|Acidobacteriales	Acidobacteriae	Acidobacteriales			Polypodiopsida	Others	Zingiberaceae	Musa
bASV2263	757cba647ff755163cd65a75a7c18653	Bacteria	0.00849137	-1714.03	-1714.2	0.566774	0.99313	bASV2263|uncultured_bacterium	Blastocatellia	45985	45985	45985	Others	Asparagales	Asparagaceae	Dypsis
bASV863	f15deaebd3871bd4c70474458eb86cc5	Bacteria	7.33137e-05	-1769.11	-1769.11	1	1	bASV863|Entotheonellaceae	Entotheonellia	Entotheonellales	Entotheonellaceae	Entotheonellaceae	NA	NA	Urticaceae	Rhaphidophora
bASV5359	ff2d62e1f2bd27ba6802fb6670a4c7c1	Bacteria	0.00964581	-1645.18	-1645.24	0.740628	1	bASV5359|Escherichia-Shigella	Gammaproteobacteria	Enterobacterales	Enterobacteriaceae	Escherichia-Shigella	NA	NA	Asteraceae	Brassaiopsis
bASV3134	3dba7816b031b7f2b16b2d471c9d41a2	Bacteria	7.33137e-05	-1695.99	-1695.98	1	1	bASV3134|uncultured_subdivision	Verrucomicrobiae	Pedosphaerales	Pedosphaeraceae	Pedosphaeraceae	NA	NA	Lamiaceae	Dypsis
bASV3976	847ecba73e683e0d2dd2d1b76a6dd9cf	Bacteria	0.26413	-1630.84	-1635.82	0.00159984	0.0285267	bASV3976|Dongia	Alphaproteobacteria	Dongiales	Dongiaceae	Dongia	NA	NA	Araceae	Alocasia
bASV537	f8f2f8dd611e29eb1a6111b97ddc153e	Bacteria	7.33137e-05	-1779.86	-1779.86	1	1	bASV537|Oxalobacteraceae	Gammaproteobacteria	Burkholderiales	Oxalobacteraceae		NA	Arecales	Urticaceae	Polyalthia
bASV2302	7e067e6ba775ab0a155c58d6a592c2e7	Bacteria	0.0113813	-1677.94	-1678.17	0.497996	0.909549	bASV2302|Paenibacillus_pocheonensis	Bacilli	Paenibacillales	Paenibacillaceae	Paenibacillus	NA	NA	NA	NA
bASV2471	c73c91e7eed49e2f13a91a11da3b3281	Bacteria	0.110803	-1678.55	-1679.95	0.0950953	0.315986	bASV2471|uncultured_bacterium	Chloroflexia	Chloroflexales	Roseiflexaceae		NA	Arecales	Asparagaceae	Fagraea
bASV1721	c6a8c60f19db6b10abbdc3ab0cbb39a2	Bacteria	7.33137e-05	-1748.62	-1748.62	1	1	bASV1721|Blastococcus	Actinobacteria	Frankiales	Geodermatophilaceae	Blastococcus	NA	NA	NA	Brassaiopsis
bASV1628	22c0f70371229083ebc20ad8262adf1c	Bacteria	0.0960412	-1704.91	-1707.6	0.0203045	0.127255	bASV1628|Acidibacter	Gammaproteobacteria	Gammaproteobacteria_Incertae_Sedis	Unknown_Family	Acidibacter	NA	Malvales	Malvaceae	Horsfieldia
bASV831	ce3f82a2620f0909105e8535d288c05d	Bacteria	0.100914	-1782.36	-1782.73	0.389074	0.772049	bASV831|Gaiellales	Thermoleophilia	Gaiellales			NA	Lamiales	Acanthaceae	Clerodendrum
bASV1075	98259f6fafdbc0abf9adc5cf05200432	Bacteria	0.0145898	-1735.37	-1735.52	0.585756	1	bASV1075|uncultured_Xanthomonadaceae	Gammaproteobacteria	Xanthomonadales	Rhodanobacteraceae	Rhodanobacter	Others	Malvales	Poaceae	Podocarpus
bASV4167	e635b03bff45cd17c496cde7f2ee7c5b	Bacteria	0.0366302	-1698.52	-1699.69	0.124893	0.375804	bASV4167|uncultured_bacterium	Acidobacteriae	Subgroup_2	Subgroup_2	Subgroup_2	NA	Myrtales	Myrtaceae	NA
bASV2218	8d77d03d4230c6852e7e0afcbeb92c2d	Bacteria	0.0239542	-1698.37	-1698.95	0.28492	0.619799	bASV2218|67-14	Thermoleophilia	Solirubrobacterales	67-14	67-14	NA	Arecales	Myrtaceae	Fagraea
bASV1492	0333a7fca3e000a3c5934ea360730bd0	Bacteria	0.168387	-1727.53	-1731.94	0.00294984	0.0405923	bASV1492|mle1-7	Gammaproteobacteria	Burkholderiales	Nitrosomonadaceae	mle1-7	NA	Arecales	Arecaceae	Dypsis
bASV1372	87a8e9a9011fb2ae0d4e190ab70c4dca	Bacteria	0.045984	-1733.06	-1733.25	0.53023	0.947453	bASV1372|Romboutsia	Clostridia	Peptostreptococcales-Tissierellales	Peptostreptococcaceae	Romboutsia	NA	NA	Phyllanthaceae	Fagraea
bASV687	f12c2066d9dd4f4854cdd75fa06bf7fe	Bacteria	7.33137e-05	-1787.09	-1787.08	1	1	bASV687|Pedomicrobium	Alphaproteobacteria	Rhizobiales	Hyphomicrobiaceae	Pedomicrobium	NA	Arecales	Arecaceae	Dypsis
bASV3059	6930104f454147574313777655877eed	Bacteria	7.33137e-05	-1718.66	-1718.66	1	1	bASV3059|uncultured_bacterium	Bacteroidia	Sphingobacteriales	AKYH767	AKYH767	NA	Myrtales	Myrtaceae	Alocasia
bASV5214	bbace3bb4314664c7a4692da1f867601	Bacteria	0.0656733	-1662.46	-1664.77	0.0314722	0.16296	bASV5214|uncultured_bacterium	Clostridia	Clostridia	Gracilibacteraceae	Lutispora	NA	Arecales	Myrtaceae	Fagraea
bASV351	d78c2f9073e250f3e26478d4fdcc0483	Bacteria	0.0596254	-1801.71	-1803.19	0.0850386	0.293733	bASV351|Bradyrhizobium	Alphaproteobacteria	Rhizobiales	Xanthobacteraceae	Bradyrhizobium	NA	Malvales	Zingiberaceae	Musa
bASV988	e7d7612a0c78339279cf42c74de85b3c	Bacteria	0.024043	-1719.68	-1720.07	0.375334	0.755441	bASV988|ADurb.Bin063-1	Verrucomicrobiae	Pedosphaerales	Pedosphaeraceae	ADurb.Bin063-1	NA	Arecales	Myrtaceae	Dypsis
bASV346	2c6cbc61ac429e3e98ffbb261f2d0493	Bacteria	0.15668	-1812.36	-1815.63	0.0105601	0.0848829	bASV346|uncultured_Rubrobacterales	Thermoleophilia	Gaiellales			NA	Lamiales	Lamiaceae	Fagraea
bASV2501	7abf14a009c0d027a3f8b14758c0ead5	Bacteria	0.241324	-1682.14	-1686.02	0.00531395	0.0577464	bASV2501|metagenome	Gammaproteobacteria	Gammaproteobacteria_Incertae_Sedis	Unknown_Family	Acidibacter	NA	Lamiales	Lamiaceae	NA
bASV3239	ad507b24538d939cada345dee5781d06	Bacteria	0.0794452	-1631.34	-1632.34	0.158032	0.434458	bASV3239|Paenibacillus	Bacilli	Paenibacillales	Paenibacillaceae	Paenibacillus	NA	Lamiales	Urticaceae	Brassaiopsis
bASV68	832c75868d05150a05a6ca5f39d22bcf	Bacteria	7.33137e-05	-1798.77	-1798.77	1	1	bASV68|Pseudomonas	Gammaproteobacteria	Pseudomonadales	Pseudomonadaceae	Pseudomonas	NA	Sapindales	Asteraceae	Brassaiopsis
bASV702	914364c87c468aa43d16aa6531eb3271	Bacteria	0.0462836	-1782.65	-1783.01	0.390977	0.774611	bASV702|uncultured_bacterium	Subgroup_5	Subgroup_5	Subgroup_5	Subgroup_5	NA	NA	Myrtaceae	NA
bASV1963	f46be4018fce193e88f668d0cb951545	Bacteria	0.266235	-1727.23	-1731.8	0.00251432	0.0367266	bASV1963|Mesorhizobium	Alphaproteobacteria	Rhizobiales	Rhizobiaceae	Mesorhizobium	NA	Arecales	Lamiaceae	Mycetia
bASV697	93caf33aa48f7564ce914fe454ef789b	Bacteria	0.0600923	-1784.67	-1784.77	0.653911	1	bASV697|uncultured_bacterium	Alphaproteobacteria	Rhizobiales	Amb-16S-1323	Amb-16S-1323	NA	NA	Araceae	Alocasia
bASV229	de5177f537ce43b4f90b51bd410acbff	Bacteria	0.0836381	-1663.86	-1666.72	0.0166642	0.113818	bASV229|Rhodoplanes	Alphaproteobacteria	Rhizobiales	Xanthobacteraceae	Rhodoplanes	NA	Lamiales	Urticaceae	Mycetia
bASV4500	67817bac957cc40361cd729ba3f46473	Bacteria	0.143532	-1654.52	-1655.52	0.156309	0.43069	bASV4500|uncultured_bacterium	Gemmatimonadetes	Gemmatimonadales	Gemmatimonadaceae	Gemmatimonas	NA	NA	Acanthaceae	NA
bASV3218	148a3e7623d93a92edc6aadeaa461a1a	Bacteria	7.33137e-05	-1616.96	-1616.96	1	1	bASV3218|Allorhizobium-Neorhizobium-Pararhizobium-Rhizobium	Alphaproteobacteria	Rhizobiales	Rhizobiaceae	Allorhizobium-Neorhizobium-Pararhizobium-Rhizobium	NA	NA	Urticaceae	NA
bASV1449	c3ec02db8fb01742efc7a81181a0aac1	Bacteria	0.0528022	-1764.81	-1765.31	0.316552	0.673012	bASV1449|Marmoricola_sp.	Actinobacteria	Propionibacteriales	Nocardioidaceae	Nocardioides	Pinopsida	Sapindales	Myrtaceae	Fagraea
bASV4084	64b233e9b79732e2900cd1362fa09406	Bacteria	0.299151	-1671.08	-1676.39	0.00111771	0.0237819	bASV4084|uncultured_bacterium	Ktedonobacteria	Ktedonobacterales	JG30-KF-AS9	JG30-KF-AS9	Polypodiopsida	Lamiales	Acanthaceae	Fagraea
bASV3110	632233cc2955d65776a354f8d4f0ee52	Bacteria	0.216047	-1706.46	-1709.05	0.022944	0.13627	bASV3110|uncultured_bacterium	Thermoleophilia	Solirubrobacterales	Solirubrobacteraceae	Conexibacter	NA	NA	Acanthaceae	Mycetia
bASV86	3dd4c9a456e1b59d5797b08bff0549ce	Bacteria	0.0339238	-1764.55	-1766.19	0.0702082	0.260656	bASV86|Enterobacterales	Gammaproteobacteria	Enterobacterales			NA	Arecales	Asteraceae	Fagraea
bASV424	832a7d06280e96bda9d2c254c000fa5d	Bacteria	0.195603	-1780.89	-1782.9	0.0449357	0.196167	bASV424|uncultured_Rubrobacteria	Thermoleophilia	Gaiellales	Gaiellaceae	Gaiella	NA	Sapindales	Meliaceae	NA
bASV3344	aefc0a0e20ca8033af97441d8ec00983	Bacteria	7.33137e-05	-1640.75	-1640.75	1	1	bASV3344|Comamonadaceae	Gammaproteobacteria	Burkholderiales	Comamonadaceae		NA	NA	Urticaceae	Alocasia
bASV4459	64d64d29583699e0ad6b2fe589c1dd7a	Bacteria	0.180738	-1655.77	-1656.4	0.260765	0.587418	bASV4459|Pedosphaeraceae	Verrucomicrobiae	Pedosphaerales	Pedosphaeraceae		NA	Lamiales	Acanthaceae	Brassaiopsis
bASV959	49f6159d7316d16988601f034985cf74	Bacteria	0.0968503	-1735.54	-1738.21	0.0207502	0.128773	bASV959|uncultured_bacterium	Alphaproteobacteria	Rhizobiales	Rhizobiales_Incertae_Sedis	Bauldia	Polypodiopsida	NA	Urticaceae	NA
bASV843	0b310a73cc1d5a7d183cf9f8f261a843	Bacteria	0.0677493	-1774.97	-1776.79	0.0564581	0.227994	bASV843|uncultured_Rubrobacterales	Thermoleophilia	Gaiellales			NA	Arecales	Urticaceae	Fagraea
bASV494	275b7fdf779c6e8ff9eae79b935356c5	Bacteria	0.0376645	-1821.23	-1821.84	0.267654	0.596043	bASV494|Desulfobacterota					NA	Others	Lamiaceae	Mycetia
bASV1567	4f4a5186a395d1ad87f0075dee769521	Bacteria	7.33137e-05	-1709.49	-1709.49	1	1	bASV1567|Caulobacteraceae	Alphaproteobacteria	Caulobacterales	Caulobacteraceae		NA	NA	Araceae	Alocasia
bASV680	0ca8a19485a644125c4648e44dc81c08	Bacteria	7.33137e-05	-1785.2	-1785.2	1	1	bASV680|uncultured_bacterium	Alphaproteobacteria	Rhizobiales	Rhizobiales_Incertae_Sedis		Polypodiopsida	Others	Urticaceae	Horsfieldia
bASV636	e72e98e360f21d5e898f18ef8aa7251e	Bacteria	0.0430088	-1743.35	-1744.02	0.246111	0.567534	bASV636|Sphingomonas	Alphaproteobacteria	Sphingomonadales	Sphingomonadaceae	Sphingomonas	Pinopsida	Myrtales	Poaceae	Podocarpus
bASV1006	5ac683ad48037f31c24991a27806c089	Bacteria	0.0317555	-1767.08	-1768.26	0.125478	0.376127	bASV1006|uncultured_bacterium	Alphaproteobacteria	Rhizobiales	Xanthobacteraceae	Rhodoplanes	NA	Sapindales	Meliaceae	Musa
bASV22	84bf4074788ef3449d068c5697eafc07	Bacteria	7.33137e-05	-1547.99	-1547.98	1	1	bASV22|Sphingobium_yanoikuyae	Alphaproteobacteria	Sphingomonadales	Sphingomonadaceae	Sphingobium	NA	NA	Urticaceae	Excoecaria
bASV982	20591c9530f1e36b5b1fa5206e803f7a	Bacteria	0.132422	-1754.89	-1760.02	0.00135981	0.0271105	bASV982|Iamia	Acidimicrobiia	Microtrichales	Iamiaceae	Iamia	NA	Arecales	Urticaceae	Alocasia
bASV780	edd5bf2e0d6e7e8239dfe1b1ef8490d2	Bacteria	0.0961942	-1779.44	-1781.17	0.0634303	0.242989	bASV780|MND1	Gammaproteobacteria	Burkholderiales	Nitrosomonadaceae	MND1	NA	Arecales	Meliaceae	Fagraea
bASV527	75ab3fa6cbfa397a0f5d2e43b61a8c8f	Bacteria	7.33137e-05	-1771.28	-1771.28	1	1	bASV527|Enterobacteriaceae	Gammaproteobacteria	Enterobacterales	Enterobacteriaceae		NA	NA	Asteraceae	Duranta
bASV1964	2a4f3bff6f928d071e425bae84339f1a	Bacteria	0.071466	-1709.89	-1711	0.135402	0.39452	bASV1964|Intrasporangiaceae	Actinobacteria	Micrococcales	Intrasporangiaceae		NA	Arecales	Myrtaceae	Dypsis
bASV1061	b9b0a8c3121e94c437ef06e68ee51c44	Bacteria	7.33137e-05	-1759.99	-1759.99	1	1	bASV1061|Rhodoplanes	Alphaproteobacteria	Rhizobiales	Xanthobacteraceae	Rhodoplanes	Polypodiopsida	Lamiales	Urticaceae	Musa
bASV2431	d5866ef8d9a21870c895521f67f17509	Bacteria	0.0185058	-1657.9	-1658.45	0.29357	0.634773	bASV2431|Nocardioides_baekrokdamisoli	Actinobacteria	Propionibacteriales	Nocardioidaceae	Nocardioides	Others	Arecales	Poaceae	Horsfieldia
bASV564	3d029cff34fb63e1f869132e7ce85552	Bacteria	0.0787948	-1759.34	-1759.96	0.267487	0.596043	bASV564|uncultured_bacterium	Thermoleophilia	Gaiellales	Gaiellaceae	Gaiella	NA	NA	Myrtaceae	Pandanus
bASV990	5aa7bf67ed7a22ca4784a0ba1eb9b7de	Bacteria	0.076262	-1737.12	-1740.98	0.0054592	0.0586056	bASV990|uncultured_bacterium	Acidimicrobiia	Microtrichales	Microtrichaceae		NA	Myrtales	Myrtaceae	Fagraea
bASV268	8b665f0205f80dda8a69fd771c3bb94e	Bacteria	0.00732289	-1714.67	-1714.82	0.582957	1	bASV268|Klebsiella	Gammaproteobacteria	Enterobacterales	Enterobacteriaceae	Klebsiella	Others	Arecales	Asteraceae	Brassaiopsis
bASV2045	03b0016911a507fd84d702f8d95c6f37	Bacteria	0.170235	-1724.16	-1727.31	0.0121785	0.0920478	bASV2045|A0839	Alphaproteobacteria	Rhizobiales	A0839	A0839	NA	Arecales	Asparagaceae	Dypsis
bASV839	5267ce678cfff44e3ae83c02ad2a498f	Bacteria	0.193092	-1753.94	-1757.31	0.00938543	0.0797683	bASV839|Nitrospira	Nitrospiria	Nitrospirales	Nitrospiraceae	Nitrospira	NA	Malvales	Urticaceae	NA
bASV2701	658246937ebe91b8a37af6ce5d26a5bd	Bacteria	0.0756487	-1685.44	-1691.39	0.000561703	0.0164858	bASV2701|uncultured_bacterium	MBNT15	MBNT15	MBNT15	MBNT15	NA	Myrtales	Myrtaceae	Alocasia
bASV5115	c6ff645262d5919f3a77b420a8c1e695	Bacteria	0.0577686	-1630.39	-1630.52	0.613497	1	bASV5115|metagenome	Bacteroidia	Flavobacteriales	NS9_marine_group	NS9_marine_group	NA	Arecales	Acanthaceae	Mycetia
bASV352	a8e4d7194a387383241d33aeb17afcff	Bacteria	7.33137e-05	-1795.39	-1795.38	1	1	bASV352|Flavobacterium	Bacteroidia	Flavobacteriales	Flavobacteriaceae	Flavobacterium	NA	NA	NA	NA
bASV651	50bb509eab18c6a7704c6052aecfe704	Bacteria	0.0285146	-1770.63	-1771.62	0.16068	0.439353	bASV651|Subgroup_10	Thermoanaerobaculia	Thermoanaerobaculales	Thermoanaerobaculaceae	Subgroup_10	NA	Myrtales	Myrtaceae	Syzygium
bASV588	366489666ef6cf9332ea6fa472d93e8c	Bacteria	7.33137e-05	-1776.41	-1776.41	1	1	bASV588|Acidobacteriaceae_(Subgroup_1)	Acidobacteriae	Acidobacteriales	Acidobacteriaceae_(Subgroup_1)		Polypodiopsida	Malvales	Poaceae	Musa
bASV678	94c50937ea1e0e9aa084379e2f824f20	Bacteria	0.120395	-1769.44	-1773.04	0.00728295	0.0688076	bASV678|Kitasatospora	Actinobacteria	Streptomycetales	Streptomycetaceae	Kitasatospora	Others	Arecales	Arecaceae	Fagraea
bASV1144	1299031a0e12dcf8fc7a4a4360dbba69	Bacteria	7.33137e-05	-1736.52	-1736.51	1	1	bASV1144|uncultured_Chitinophagaceae	Bacteroidia	Chitinophagales	Chitinophagaceae		NA	Gentianales	Urticaceae	Begonia
bASV2970	9656898c4a9c3e771ba1d96f246cbfce	Bacteria	0.0345454	-1628.32	-1629.59	0.111064	0.348661	bASV2970|Lechevalieria	Actinobacteria	Pseudonocardiales	Pseudonocardiaceae	Lechevalieria	NA	Lamiales	Acanthaceae	Mycetia
bASV2138	0548ce5d7c9c59dd2c49d59107702e78	Bacteria	0.0280132	-1721.84	-1722.51	0.247939	0.570193	bASV2138|Nitratireductor	Alphaproteobacteria	Rhizobiales	Rhizobiaceae	Nitratireductor	NA	Myrtales	Myrtaceae	Alocasia
bASV635	0a4c44d170d88c0459c8815728a5a92f	Bacteria	7.33137e-05	-1742.35	-1742.35	1	1	bASV635|uncultured_soil	Actinobacteria	Frankiales	Acidothermaceae	Acidothermus	NA	NA	NA	NA
bASV2565	22c8293dd6137fe598e662f5348071fe	Bacteria	7.33137e-05	-1649.36	-1649.36	1	1	bASV2565|Paenibacillus	Bacilli	Paenibacillales	Paenibacillaceae	Paenibacillus	NA	NA	Urticaceae	NA
bASV1480	ccd5418ae0b3a311edeb1f1ad49fd753	Bacteria	0.0254029	-1745.81	-1745.85	0.772405	1	bASV1480|Comamonadaceae	Gammaproteobacteria	Burkholderiales	Comamonadaceae		NA	NA	Urticaceae	Begonia
bASV740	2b9ceaffe7934265b6c12c761d2154ef	Bacteria	0.0358978	-1773	-1773.25	0.471828	0.877143	bASV740|Gemmatimonadaceae	Gemmatimonadetes	Gemmatimonadales	Gemmatimonadaceae		NA	Asparagales	Asparagaceae	Bauhinia
bASV1524	6df8946a65bfb959eafbb005d142ea78	Bacteria	0.0597576	-1768.59	-1769.83	0.115325	0.358286	bASV1524|Alphaproteobacteria	Alphaproteobacteria				NA	Arecales	Myrtaceae	Bauhinia
bASV6731	7709df606fb8ffe6b0e03ed294e1f29b	Bacteria	0.0944017	-1614.71	-1617.1	0.0287497	0.155876	bASV6731|metagenome	Gammaproteobacteria	Burkholderiales	Nitrosomonadaceae		NA	Rosales	NA	NA
bASV2917	2c904537ec2b19d5f2a901b6de9b8874	Bacteria	7.33137e-05	-1713.87	-1713.87	1	1	bASV2917|uncultured_soil	Thermoanaerobaculia	Thermoanaerobaculales	Thermoanaerobaculaceae	Subgroup_10	NA	Myrtales	Myrtaceae	Dypsis
bASV142	800d2ba263bf2279bdbc5f7134ef300c	Bacteria	7.33137e-05	-1825.42	-1825.42	1	1	bASV142|Acidobacteriales	Acidobacteriae	Acidobacteriales			Others	Others	Zingiberaceae	Musa
bASV9	8fb5092f3a1890f54a558ac3bb2aa62d	Bacteria	7.33137e-05	-1861.88	-1861.88	1	1	bASV9|Pseudomonas	Gammaproteobacteria	Pseudomonadales	Pseudomonadaceae	Pseudomonas	NA	Lamiales	Acanthaceae	Heptapleurum
bASV1709	5ea9b2d81fae902172b213e5d80be7ab	Bacteria	0.0588802	-1725.71	-1727.81	0.0403755	0.184857	bASV1709|uncultured_bacterium	Actinobacteria	Frankiales	Frankiales	Frankiales	NA	Myrtales	Myrtaceae	Magnolia
bASV1338	fc5c5aef565336fa199589d01bf71da4	Bacteria	7.33137e-05	-1776.35	-1776.35	1	1	bASV1338|uncultured_Armatimonadetes	Fimbriimonadia	Fimbriimonadales	Fimbriimonadaceae	Fimbriimonadaceae	NA	NA	Lauraceae	Codiaeum
bASV3511	c33db43ce2db796c8370f040f39ec6d4	Bacteria	0.0226926	-1653.94	-1654.58	0.257909	0.584101	bASV3511|uncultured_bacterium	Bacteroidia	Chitinophagales	Chitinophagaceae	Dinghuibacter	NA	Asparagales	Araliaceae	Alocasia
bASV1001	83eb705e0a9c5fc72ad81298bcb34d6a	Bacteria	0.146446	-1773.36	-1774.27	0.176705	0.459361	bASV1001|Xanthobacteraceae	Alphaproteobacteria	Rhizobiales	Xanthobacteraceae		NA	NA	NA	Horsfieldia
bASV1996	2455f70dfa90f55b960ad079eff540a0	Bacteria	0.034474	-1742.08	-1742.23	0.584294	1	bASV1996|Pedosphaeraceae	Verrucomicrobiae	Pedosphaerales	Pedosphaeraceae		NA	Asparagales	Myrtaceae	Fagraea
bASV3931	6c5e44203e476273e29ef611bf2cd8ca	Bacteria	0.270933	-1674.03	-1676.88	0.0168796	0.114625	bASV3931|Xanthobacteraceae	Alphaproteobacteria	Rhizobiales	Xanthobacteraceae		NA	NA	Urticaceae	Fagraea
bASV2803	0602f29ebf3bb8cd781a62a25ddc5c17	Bacteria	0.0412034	-1686.67	-1688.23	0.0779839	0.277715	bASV2803|uncultured_bacterium	Bacteroidia	Chitinophagales	Chitinophagaceae	Puia	NA	Myrtales	Myrtaceae	Magnolia
bASV961	eedf1686c0c0287c965470f06c13917a	Bacteria	0.0350996	-1756.21	-1757.13	0.174316	0.456698	bASV961|Nocardioides	Actinobacteria	Propionibacteriales	Nocardioidaceae	Nocardioides	NA	Arecales	Lamiaceae	NA
bASV277	25fe3c13c8224abb2b34d06f706ad749	Bacteria	0.0953136	-1756.56	-1759.96	0.00902709	0.0788158	bASV277|uncultured_bacterium	Thermoleophilia	Solirubrobacterales	Solirubrobacteraceae	Solirubrobacter	Magnoliopsida	Lamiales	Myrtaceae	Alocasia
bASV254	69cb987b521f2552b2db8b29ddd8594e	Bacteria	0.0752416	-1734.22	-1736.42	0.0355688	0.172861	bASV254|Pseudomonas	Gammaproteobacteria	Pseudomonadales	Pseudomonadaceae	Pseudomonas	NA	Sapindales	Urticaceae	Brassaiopsis
bASV1842	7a7710f4ca98dde70e1795696ebd80f4	Bacteria	0.0164772	-1720.07	-1720.49	0.363916	0.73722	bASV1842|Pseudonocardia	Actinobacteria	Pseudonocardiales	Pseudonocardiaceae	Pseudonocardia	NA	Lamiales	Acanthaceae	Fagraea
bASV1351	573dc20309ef0b47cdb707368ac38163	Bacteria	7.33137e-05	-1744.42	-1744.42	1	1	bASV1351|Subgroup_10	Thermoanaerobaculia	Thermoanaerobaculales	Thermoanaerobaculaceae	Subgroup_10	NA	NA	Poaceae	Lagerstroemia
bASV2625	22e2602206759d894413e19fc066dea7	Bacteria	0.0348153	-1680.08	-1680.92	0.195974	0.492501	bASV2625|CL500-29_marine_group	Acidimicrobiia	Microtrichales	Ilumatobacteraceae	CL500-29_marine_group	NA	Lamiales	Lamiaceae	Alocasia
bASV4631	a6e0ebcc94b48045af3f1875a931700e	Bacteria	0.25161	-1661.08	-1664.45	0.00945122	0.0797683	bASV4631|metagenome	Alphaproteobacteria	Rhizobiales	Hyphomicrobiaceae	Hyphomicrobium	Polypodiopsida	NA	Acanthaceae	Mycetia
bASV1169	67a5ceabb9835e9aad1a3a4e0516578a	Bacteria	0.0217016	-1776.12	-1776.36	0.48341	0.892775	bASV1169|uncultured_beta	Gammaproteobacteria	Burkholderiales	TRA3-20	TRA3-20	NA	NA	Myrtaceae	Codiaeum
bASV492	aa5fc792db2cb7e881e78089d3a3daba	Bacteria	7.33137e-05	-1756.88	-1756.88	1	1	bASV492|uncultured_bacterium	AD3	AD3	AD3	AD3	Others	Others	Poaceae	Lagerstroemia
bASV321	6f4fbbe18e99a4460aa65ce4730882d4	Bacteria	0.00974272	-1812.27	-1812.35	0.688252	1	bASV321|Xanthobacteraceae	Alphaproteobacteria	Rhizobiales	Xanthobacteraceae		Polypodiopsida	Others	Poaceae	Horsfieldia
bASV1448	b08f91376859ab380d80fa7ea3c379a8	Bacteria	0.22314	-1749.66	-1751.85	0.0363036	0.174735	bASV1448|uncultured_soil	Thermoleophilia	Gaiellales			NA	Lamiales	Lamiaceae	Musa
bASV1632	1732bbaf1e3060cdefd338d549b568b0	Bacteria	0.0652262	-1728.36	-1730.53	0.0372901	0.17557	bASV1632|uncultured_soil	Thermoleophilia	Solirubrobacterales	67-14	67-14	NA	NA	Acanthaceae	Alocasia
bASV35	71332c3f08dd47c402e5ea4a5cb0e2d7	Bacteria	0.0375304	-1832.97	-1833.39	0.358159	0.73016	bASV35|Pseudolabrys	Alphaproteobacteria	Rhizobiales	Xanthobacteraceae	Pseudolabrys	NA	Lamiales	Urticaceae	Dypsis
bASV2191	f25a58b8ea8b354751e9bb528a09ea6f	Bacteria	0.154429	-1675.02	-1677.12	0.0407646	0.185954	bASV2191|Cohnella	Bacilli	Paenibacillales	Paenibacillaceae	Cohnella	NA	Malvales	Araliaceae	Brassaiopsis
bASV3023	343252c66e776f274f79012977375051	Bacteria	7.33137e-05	-1628.65	-1628.65	1	1	bASV3023|Nitrobacter	Alphaproteobacteria	Rhizobiales	Xanthobacteraceae	Nitrobacter	NA	NA	Asteraceae	Excoecaria
bASV77	6798b1bfa4e499f4d4aa1ca71fa87ce4	Bacteria	0.0990043	-1734.26	-1737.44	0.0117447	0.0898413	bASV77|Steroidobacter	Gammaproteobacteria	Steroidobacterales	Steroidobacteraceae	Steroidobacter	Pinopsida	Sapindales	Myrtaceae	Bauhinia
bASV1113	666240086c191bb9b88fd4beddb4c2b2	Bacteria	7.33137e-05	-1762	-1761.99	1	1	bASV1113|Candidatus_Solibacter	Acidobacteriae	Solibacterales	Solibacteraceae	Candidatus_Solibacter	NA	NA	Urticaceae	Mycetia
bASV1738	cf87010117b9830388931c01063fa36a	Bacteria	0.0382379	-1715.98	-1717.39	0.0931789	0.310959	bASV1738|uncultured_Syntrophobacterales	bacteriap25	bacteriap25	bacteriap25	bacteriap25	NA	Malpighiales	Myrtaceae	Alocasia
bASV1622	d0c5442ea18b5f840b9b814b6f5b0187	Bacteria	0.00049421	-1688.03	-1688.03	0.981148	1	bASV1622|uncultured_Desulfuromonadales	Desulfuromonadia	Geobacterales	Geobacteraceae	Geobacter	NA	Arecales	Arecaceae	NA
bASV3179	7d28914fb7729826a5a5dd22463d4a67	Bacteria	7.33137e-05	-1670.54	-1670.54	1	1	bASV3179|Enterobacterales	Gammaproteobacteria	Enterobacterales			NA	NA	NA	NA
bASV313	47b5aa874b34e67d7020cd2b39378ade	Bacteria	0.067202	-1801.5	-1803.29	0.0583974	0.232162	bASV313|uncultured_gamma	Gammaproteobacteria	Burkholderiales	TRA3-20	TRA3-20	Magnoliopsida	Rosales	Myrtaceae	Alocasia
bASV528	e03f05cee2c348044ff866a0758f9199	Bacteria	7.33137e-05	-1761.02	-1761.02	1	1	bASV528|Bacillus	Bacilli	Bacillales	Bacillaceae	Bacillus	NA	Arecales	Phyllanthaceae	Brassaiopsis
bASV822	21a3064086582fe965753f3819a6cc6f	Bacteria	0.0750929	-1781.35	-1783.61	0.0337956	0.170323	bASV822|TRA3-20	Gammaproteobacteria	Burkholderiales	TRA3-20	TRA3-20	NA	Rosales	Araceae	Alocasia
bASV1095	1fdea9e5462c53e3bbf3df74c565f01e	Bacteria	7.33137e-05	-1779.69	-1779.68	1	1	bASV1095|uncultured_Alphaproteobacteria	Alphaproteobacteria	Rhizobiales			NA	NA	Myrtaceae	Alocasia
bASV4709	817e44a787777fb5573da21b2ce04646	Bacteria	0.0857019	-1629.41	-1633.03	0.00715763	0.068132	bASV4709|uncultured_bacterium	Actinobacteria	Micrococcales	Microbacteriaceae	Amnibacterium	NA	Myrtales	NA	Terminalia
bASV1360	f8e5df6ac8ac0a9997b8f756762ee848	Bacteria	0.207578	-1759.59	-1762.32	0.0194637	0.124018	bASV1360|Nocardioides	Actinobacteria	Propionibacteriales	Nocardioidaceae	Nocardioides	NA	Arecales	Acanthaceae	Fagraea
bASV909	e05c273575b09a2eefc15b4e19def764	Bacteria	7.33137e-05	-1743.33	-1743.33	1	1	bASV909|Sphingomonas_panni	Alphaproteobacteria	Sphingomonadales	Sphingomonadaceae	Sphingomonas	NA	NA	NA	Dypsis
bASV7455	422ed5821b937e46f10cdf0d60e74dbe	Bacteria	0.0601613	-1637.74	-1639.53	0.058659	0.232433	bASV7455|uncultured_Planctomyces	OM190	OM190	OM190	OM190	NA	NA	Araceae	Alocasia
bASV4189	feb018a04ff05bfd9e7b62c28481a9fd	Bacteria	0.0252257	-1630.61	-1630.97	0.395916	0.783172	bASV4189|Actinoplanes	Actinobacteria	Micromonosporales	Micromonosporaceae	Actinoplanes	NA	Myrtales	Myrtaceae	Syzygium
bASV2010	49524ee1098f8912c340162fd99e30a3	Bacteria	7.33137e-05	-1695	-1694.99	1	1	bASV2010|uncultured_bacterium	Subgroup_11	Subgroup_11	Subgroup_11	Subgroup_11	NA	Arecales	Lamiaceae	Musa
bASV377	7fec22ecf9055f48ad6059a1a659b52c	Bacteria	0.240223	-1806.9	-1814.52	9.50056e-05	0.00570035	bASV377|Xanthobacteraceae	Alphaproteobacteria	Rhizobiales	Xanthobacteraceae		Polypodiopsida	Others	Lamiaceae	Musa
bASV498	0270f3bfffba44de3e4efe6701b03d13	Bacteria	0.0654315	-1795.32	-1798.63	0.0101925	0.0838512	bASV498|Agromyces	Actinobacteria	Micrococcales	Microbacteriaceae	Agromyces	NA	Myrtales	Myrtaceae	Bauhinia
bASV274	6e148fe14e629c954df2937a9412edec	Bacteria	0.122195	-1799.59	-1803.78	0.00382074	0.0467348	bASV274|uncultured_beta	Gammaproteobacteria	Burkholderiales	Nitrosomonadaceae	mle1-7	NA	Rosales	Myrtaceae	Alocasia
bASV1712	0bbe78532d93b4e71956bc6864d3c8f4	Bacteria	0.132178	-1688.63	-1695.23	0.000280988	0.0107797	bASV1712|uncultured_bacterium	SJA-28	SJA-28	SJA-28	SJA-28	NA	Arecales	Myrtaceae	Dypsis
bASV2128	8f6925d60a3407c1788b1d9c066396ee	Bacteria	7.33137e-05	-1657.66	-1657.65	1	1	bASV2128|Puia	Bacteroidia	Chitinophagales	Chitinophagaceae	Puia	NA	NA	Poaceae	NA
bASV3384	fc488ef8dba0a9c724f487088607cf12	Bacteria	0.309727	-1687.75	-1692.51	0.00202437	0.0322371	bASV3384|uncultured_Acidobacteria	Subgroup_5	Subgroup_5	Subgroup_5	Subgroup_5	Polypodiopsida	Lamiales	Urticaceae	Begonia
bASV735	9334d81e850c6b4d5d387f4cfc53212c	Bacteria	7.33137e-05	-1785.14	-1785.14	1	1	bASV735|Mesorhizobium	Alphaproteobacteria	Rhizobiales	Rhizobiaceae	Mesorhizobium	NA	Arecales	Arecaceae	NA
bASV1024	430120c49361503ff3dd0375bfa551d5	Bacteria	0.00292398	-1727.75	-1727.78	0.807835	1	bASV1024|uncultured_Acidobacteria	Acidobacteriae	Acidobacteriales			NA	NA	Poaceae	Lagerstroemia
bASV2692	d0dadc086ce4157ed076a909be60c091	Bacteria	0.180802	-1717.66	-1719.14	0.0849215	0.293733	bASV2692|uncultured_bacterium	Thermoleophilia	Solirubrobacterales	Solirubrobacteraceae	Solirubrobacter	NA	Lamiales	Lamiaceae	Mycetia
bASV1178	409399f5cd1815347f11ee6f54698e39	Bacteria	0.143971	-1706.09	-1705.75	1	1	bASV1178|uncultured_bacterium	Alphaproteobacteria	Rhizobiales	Beijerinckiaceae	Roseiarcus	NA	NA	Poaceae	NA
bASV2073	93f203659ee4c8bbc9de1f60cf09d7e8	Bacteria	0.0722077	-1714.27	-1714.37	0.651007	1	bASV2073|Xanthobacteraceae	Alphaproteobacteria	Rhizobiales	Xanthobacteraceae		NA	NA	Urticaceae	Mycetia
bASV1487	839ef4bd5ba91328a8ec5f8a55c8594e	Bacteria	0.0193154	-1739.51	-1739.94	0.354816	0.726857	bASV1487|Bryobacter	Acidobacteriae	Bryobacterales	Bryobacteraceae	Bryobacter	NA	Rosales	Myrtaceae	Pandanus
bASV2839	ebaaea8ea633784c5b926dfd2f0aef3c	Bacteria	7.33137e-05	-1692.85	-1692.85	1	1	bASV2839|Nocardioides	Actinobacteria	Propionibacteriales	Nocardioidaceae	Nocardioides	NA	Arecales	Myrtaceae	NA
bASV2475	4012c9b72d09efa99cb7d39301077f60	Bacteria	7.33137e-05	-1635.42	-1635.42	1	1	bASV2475|Microlunatus	Actinobacteria	Propionibacteriales	Propionibacteriaceae	Microlunatus	NA	Myrtales	Apocynaceae	Lagerstroemia
bASV499	c23fe7ff4a0d01be927941895d623fcf	Bacteria	7.33137e-05	-1782.59	-1782.58	1	1	bASV499|Bacteria					NA	NA	Myrtaceae	NA
bASV1209	c51d307a343cc4bae968fa76c9993c47	Bacteria	0.0419291	-1716.54	-1717.25	0.234404	0.550056	bASV1209|Kitasatospora	Actinobacteria	Streptomycetales	Streptomycetaceae	Kitasatospora	Pinopsida	Arecales	Zingiberaceae	Lagerstroemia
bASV116	56b6546848785bdb74e6f1d2b10c92d9	Bacteria	0.0605595	-1826.86	-1829.02	0.0376738	0.175697	bASV116|Xanthobacteraceae	Alphaproteobacteria	Rhizobiales	Xanthobacteraceae		Polypodiopsida	Lamiales	Urticaceae	Musa
bASV397	4e92dc36794b97e133515ee99517a330	Bacteria	0.0996332	-1723.18	-1728.29	0.00138522	0.0272007	bASV397|Cellulomonas	Actinobacteria	Micrococcales	Cellulomonadaceae	Cellulomonas	NA	Lamiales	Acanthaceae	Fagraea
bASV3875	7a53a0ccd7370bb6a965320cd2286128	Bacteria	7.33137e-05	-1644.07	-1644.07	1	1	bASV3875|uncultured_bacterium	Alphaproteobacteria				NA	Arecales	Myrtaceae	Caryota
bASV4487	261fef6ce25fa2d1ce4ddad4a16395e7	Bacteria	0.171318	-1655.57	-1656.53	0.165561	0.446432	bASV4487|uncultured_Acidobacteria	Thermoanaerobaculia	Thermoanaerobaculales	Thermoanaerobaculaceae	Subgroup_10	NA	NA	Urticaceae	Dypsis
bASV3683	3fb5ee9b2e1e5b2a145a43c9e5154dd3	Bacteria	0.0440276	-1645.65	-1646.77	0.135953	0.395216	bASV3683|Xanthobacteraceae	Alphaproteobacteria	Rhizobiales	Xanthobacteraceae		NA	Arecales	Arecaceae	Dypsis
bASV1296	a6dfd1e5d2c00971e249afbb63a6156f	Bacteria	7.33137e-05	-1757.73	-1757.73	1	1	bASV1296|Acetobacteraceae	Alphaproteobacteria	Acetobacterales	Acetobacteraceae		NA	NA	Lauraceae	Fagraea
bASV1672	dd3d856cfc09cae515ee4035dccb1e30	Bacteria	0.0670883	-1671.29	-1674.05	0.0188782	0.121627	bASV1672|uncultured_prokaryote	Thermoleophilia	Gaiellales			NA	Arecales	Arecaceae	Fagraea
bASV3277	11bd916ee6a5ca56dfb20a0ab578b5a4	Bacteria	7.33137e-05	-1684.21	-1684.21	1	1	bASV3277|Inquilinus	Alphaproteobacteria	Azospirillales	Inquilinaceae	Inquilinus	NA	NA	Poaceae	Horsfieldia
bASV3481	1f67839ba4cd0037a77cdc1e0d388c33	Bacteria	0.0204335	-1630.57	-1631.17	0.27484	0.606708	bASV3481|uncultured_subdivision	Verrucomicrobiae	Pedosphaerales	Pedosphaeraceae	Pedosphaeraceae	NA	Arecales	Myrtaceae	Pandanus
bASV700	0ac6b9f9eebe9c22bdca7673df4b656a	Bacteria	0.0509919	-1790.09	-1792.85	0.0186197	0.120952	bASV700|Acidibacter	Gammaproteobacteria	Gammaproteobacteria_Incertae_Sedis	Unknown_Family	Acidibacter	NA	Arecales	Myrtaceae	Prunus
bASV2950	766579d8aabb0ddc85f7c8f55ab1568c	Bacteria	0.137156	-1650.79	-1658.34	0.00010175	0.00570035	bASV2950|Altererythrobacter	Alphaproteobacteria	Sphingomonadales	Sphingomonadaceae	Altererythrobacter	NA	Myrtales	Myrtaceae	Fagraea
bASV546	5b6c709209f395e024d1a47425bbe117	Bacteria	0.225514	-1779.58	-1784.3	0.00212638	0.0332346	bASV546|Xanthobacteraceae	Alphaproteobacteria	Rhizobiales	Xanthobacteraceae		Polypodiopsida	Others	Zingiberaceae	Pterospermum
bASV1077	2dc4f810bee85d43a61d6a2ab63333e0	Bacteria	0.0703644	-1769.64	-1771.91	0.0331424	0.16879	bASV1077|Pedomicrobium	Alphaproteobacteria	Rhizobiales	Hyphomicrobiaceae	Pedomicrobium	NA	NA	Arecaceae	Musa
bASV2334	b284f00c5e270263f5865d6455fce438	Bacteria	0.033974	-1717.85	-1719.03	0.125257	0.376127	bASV2334|S085	Dehalococcoidia	S085	S085	S085	NA	Arecales	Meliaceae	Dypsis
bASV1654	00cfdc1330ad5ca39c6171b0311e4665	Bacteria	0.0063144	-1740.78	-1740.78	0.926166	1	bASV1654|Microtrichales	Acidimicrobiia	Microtrichales			NA	NA	Lamiaceae	Dypsis
bASV902	4bef79f105cec34e4babbdc052c3b1ed	Bacteria	0.0297795	-1734.03	-1734.62	0.276922	0.60971	bASV902|uncultured_Rhizobium	Alphaproteobacteria	Rhizobiales	Rhizobiaceae	Allorhizobium-Neorhizobium-Pararhizobium-Rhizobium	NA	NA	Araliaceae	Fagraea
bASV376	cd6e3fd353203a9aa63180a802afd8a7	Bacteria	0.0232435	-1729.16	-1730.2	0.149581	0.41922	bASV376|Micrococcaceae	Actinobacteria	Micrococcales	Micrococcaceae		NA	Arecales	Urticaceae	Caryota
bASV2405	794bd6ed740edc507bfbe4338fb5e4e7	Bacteria	0.0304488	-1663.72	-1664.85	0.132479	0.388008	bASV2405|uncultured_microorganism	Bacteroidia	Chitinophagales	Chitinophagaceae		NA	Myrtales	Myrtaceae	Fagraea
bASV2031	897e7f8d928a4d3a21d5e56165333337	Bacteria	7.33137e-05	-1680.46	-1680.45	1	1	bASV2031|Comamonadaceae	Gammaproteobacteria	Burkholderiales	Comamonadaceae		NA	NA	Urticaceae	Alocasia
bASV1989	b3564ba949a40d3202bbbc5f631af080	Bacteria	0.0199277	-1599.31	-1600.4	0.140882	0.403976	bASV1989|Sphingobium	Alphaproteobacteria	Sphingomonadales	Sphingomonadaceae	Sphingobium	NA	Arecales	Apocynaceae	NA
bASV812	c7a0b4077fb3828f72b3925b07bc9800	Bacteria	7.33137e-05	-1751.52	-1751.52	1	1	bASV812|0319-6G20	Oligoflexia	0319-6G20	0319-6G20	0319-6G20	Polypodiopsida	Malvales	Urticaceae	Musa
bASV662	b5b69d0b7f5439828951e47827835179	Bacteria	7.33137e-05	-1781.79	-1781.78	1	1	bASV662|ADurb.Bin063-1	Verrucomicrobiae	Pedosphaerales	Pedosphaeraceae	ADurb.Bin063-1	Polypodiopsida	Malvales	Poaceae	Musa
bASV6580	d2fb98a6480dd768b07dbf1fe57a673d	Bacteria	0.0440472	-1604.12	-1606.13	0.0453964	0.197056	bASV6580|metagenome	Gammaproteobacteria	Ga0077536	Ga0077536	Ga0077536	NA	Rosales	Araceae	Alocasia
bASV1158	68711f9eec50ae39b48eaaca8794ec6f	Bacteria	0.0536668	-1759.9	-1762.08	0.0369323	0.175117	bASV1158|Pseudonocardia	Actinobacteria	Pseudonocardiales	Pseudonocardiaceae	Pseudonocardia	NA	Rosales	Myrtaceae	Alocasia
bASV5771	01361dee4a4f62f793c091a832299908	Bacteria	0.025668	-1636.13	-1637.85	0.0634344	0.242989	bASV5771|uncultured_Sphingomonadaceae	Alphaproteobacteria	Sphingomonadales	Sphingomonadaceae	Plot4-2H12	NA	NA	Urticaceae	Lagerstroemia
bASV180	44870d35fe508b789262357c25c09935	Bacteria	0.000693227	-1666.89	-1666.9	0.976447	1	bASV180|metagenome	Thermoleophilia	Solirubrobacterales	67-14	67-14	NA	NA	Euphorbiaceae	Podocarpus
bASV2087	a3498440daeb23d2f14a1533e0bd2a27	Bacteria	7.33137e-05	-1712.83	-1712.82	1	1	bASV2087|Gaiellales	Thermoleophilia	Gaiellales			NA	Myrtales	NA	Fagraea
bASV24	faa22a6d33747be7dc54eafbfce9db65	Bacteria	0.00415972	-1804.72	-1804.77	0.744309	1	bASV24|Enterobacterales	Gammaproteobacteria	Enterobacterales			Pinopsida	Others	Zingiberaceae	Podocarpus
bASV2642	de9180621fbe96a793352742e6c53f45	Bacteria	7.33137e-05	-1694.21	-1694.2	1	1	bASV2642|uncultured_bacterium	Myxococcia	Myxococcales	Myxococcaceae		NA	Arecales	Arecaceae	Pandanus
bASV1463	ba3dd0d5dff40252e94bbaf45f36c4bc	Bacteria	0.00301941	-1763.36	-1763.37	0.875495	1	bASV1463|Gemmatimonas	Gemmatimonadetes	Gemmatimonadales	Gemmatimonadaceae	Gemmatimonas	Polypodiopsida	Others	Poaceae	Musa
bASV705	0530f1005f132af4e92a4543e85a1b81	Bacteria	7.33137e-05	-1780.84	-1780.84	1	1	bASV705|Sphingomonas	Alphaproteobacteria	Sphingomonadales	Sphingomonadaceae	Sphingomonas	NA	NA	Myrtaceae	Brassaiopsis
bASV3652	7708fe9864c304d1c602c56950f95528	Bacteria	0.10145	-1654.04	-1658.17	0.00408526	0.0483358	bASV3652|Rhodanobacteraceae	Gammaproteobacteria	Xanthomonadales	Rhodanobacteraceae		NA	Myrtales	Myrtaceae	Dypsis
bASV906	cfaa85df92edb853341fc20f575d8a83	Bacteria	7.33137e-05	-1777.75	-1777.75	1	1	bASV906|uncultured_bacterium	Alphaproteobacteria	Rhizobiales	Beijerinckiaceae	FFCH5858	NA	Sapindales	Meliaceae	Dypsis
bASV1272	8efeaa7eeeda4b6fe3826c011c2c84e2	Bacteria	0.0374547	-1745.64	-1746.62	0.162864	0.441574	bASV1272|Comamonadaceae	Gammaproteobacteria	Burkholderiales	Comamonadaceae		NA	Arecales	Myrtaceae	Bauhinia
bASV1207	fb3e33cd4ae042a244ab5a5f48d46457	Bacteria	0.127247	-1774.46	-1777.52	0.013392	0.0980014	bASV1207|Gemmatimonadaceae	Gemmatimonadetes	Gemmatimonadales	Gemmatimonadaceae		NA	Arecales	Myrtaceae	Alocasia
bASV695	4acf2d544be66f1f6a2511e31a25362c	Bacteria	0.0456614	-1747.34	-1748.3	0.167135	0.448291	bASV695|Microbacterium	Actinobacteria	Micrococcales	Microbacteriaceae	Microbacterium	NA	Myrtales	Myrtaceae	Bauhinia
bASV2148	e62fa9d4e751c1cade1ca07900a81e50	Bacteria	0.20529	-1711.33	-1714.68	0.00971385	0.0809062	bASV2148|SC-I-84	Gammaproteobacteria	Burkholderiales	SC-I-84	SC-I-84	NA	NA	Urticaceae	Mycetia
bASV1800	12c9f6eb1e0e283984c44c8d03f39386	Bacteria	0.0390869	-1745.3	-1746.72	0.0916599	0.307802	bASV1800|MND1	Gammaproteobacteria	Burkholderiales	Nitrosomonadaceae	MND1	NA	Sapindales	Meliaceae	Horsfieldia
bASV3122	f43b15f7d49cae752d5f90cdb8892b48	Bacteria	0.0140606	-1710.79	-1711.14	0.405355	0.79501	bASV3122|uncultured_bacterium	Lineage_IIa	Lineage_IIa	Lineage_IIa	Lineage_IIa	NA	Myrtales	Myrtaceae	Fagraea
bASV1749	90865560e0acfb4ca5a96f7a959a3ca4	Bacteria	7.33137e-05	-1744.69	-1744.69	1	1	bASV1749|uncultured_Planctomycetaceae	Pla4_lineage	Pla4_lineage	Pla4_lineage	Pla4_lineage	NA	Arecales	Arecaceae	Dypsis
bASV2717	cd83643b78b24de6a0d5dd9fe67edc4d	Bacteria	0.0832063	-1716.09	-1720.17	0.00428765	0.0500292	bASV2717|Rhizobiales	Alphaproteobacteria	Rhizobiales			NA	Myrtales	Asparagaceae	Terminalia
bASV359	54a1d27372e576bb40ee6ae077f16730	Bacteria	0.110848	-1763.76	-1769.39	0.000790899	0.0201475	bASV359|metagenome	Gammaproteobacteria	Burkholderiales	SC-I-84	SC-I-84	NA	Lamiales	Urticaceae	Fagraea
bASV1186	c9c0c218eac7d0c2f00f595caad4889f	Bacteria	0.0989494	-1758.47	-1762	0.00786362	0.0721402	bASV1186|uncultured_organism	Actinobacteria	Propionibacteriales	Nocardioidaceae	Nocardioides	NA	Lamiales	Acanthaceae	Alocasia
bASV3625	00cf3626f3346612395a9b18fb19d57c	Bacteria	0.060725	-1674.4	-1676.11	0.0640552	0.244627	bASV3625|uncultured_Sphingobacteriales	Bacteroidia	Sphingobacteriales	AKYH767	AKYH767	NA	Arecales	Myrtaceae	Alocasia
bASV1167	40f03eee1aabf112ac32aa2dff2a1409	Bacteria	0.0261252	-1773.66	-1774.37	0.233353	0.548608	bASV1167|uncultured_bacterium	Thermoleophilia	Gaiellales	Gaiellaceae	Gaiella	NA	Myrtales	Myrtaceae	Alocasia
bASV413	3d8ecb5d475d8723e6deeedd8182e3dd	Bacteria	0.0304877	-1734.85	-1735.82	0.164248	0.444616	bASV413|Subgroup_22	Subgroup_22	Subgroup_22	Subgroup_22	Subgroup_22	NA	Sapindales	Urticaceae	NA
bASV978	a88e967b32136e3a9f192fc5ff5f8255	Bacteria	7.33137e-05	-1743.77	-1743.77	1	1	bASV978|Xanthomonadaceae	Gammaproteobacteria	Xanthomonadales	Xanthomonadaceae		NA	Arecales	Myrtaceae	Brassaiopsis
bASV4862	b994c4a35ad2f1f5623c352acca47257	Bacteria	0.0198352	-1661.31	-1661.75	0.349148	0.721061	bASV4862|uncultured_bacterium	TK10	TK10	TK10	TK10	NA	Myrtales	Myrtaceae	Codiaeum
bASV460	1566af16d9e018119d0837d31a4277d1	Bacteria	0.00130503	-1789.35	-1789.35	0.992214	1	bASV460|Methyloligellaceae	Alphaproteobacteria	Rhizobiales	Methyloligellaceae		NA	Rosales	Myrtaceae	Pandanus
bASV262	805674e5e9713de2f188467a5ba81875	Bacteria	0.058844	-1809.96	-1812.31	0.0302015	0.158981	bASV262|Flavobacterium	Bacteroidia	Flavobacteriales	Flavobacteriaceae	Flavobacterium	NA	Arecales	Myrtaceae	Pandanus
bASV638	125ad0fd17774d7cbf6f4ea722c76bce	Bacteria	0.104119	-1779.09	-1780.35	0.112383	0.351736	bASV638|Myxococcaceae	Myxococcia	Myxococcales	Myxococcaceae		NA	Myrtales	Lamiaceae	Dypsis
bASV1737	b5b206cdf8ce9d2ecb6612e2ea76ad8c	Bacteria	0.000255383	-1657.06	-1657.06	0.990561	1	bASV1737|Chitinophaga	Bacteroidia	Chitinophagales	Chitinophagaceae	Chitinophaga	NA	Asparagales	Asparagaceae	Bauhinia
bASV170	69a30821120e64a76c4b7d054ceaf6b0	Bacteria	0.0692479	-1722.27	-1722.53	0.471715	0.877143	bASV170|MB-A2-108	MB-A2-108	MB-A2-108	MB-A2-108	MB-A2-108	NA	Lamiales	Urticaceae	Pandanus
bASV2504	b7b11f6ad0af7d430528e6ff358f155b	Bacteria	0.029097	-1655.53	-1656.43	0.180411	0.465678	bASV2504|67-14	Thermoleophilia	Solirubrobacterales	67-14	67-14	NA	Rosales	Moraceae	Ficus
bASV1826	3b17df790dfaa4a1865e9f67817d9c53	Bacteria	7.33137e-05	-1672.33	-1672.32	1	1	bASV1826|Acidobacteriales	Acidobacteriae	Acidobacteriales			Polypodiopsida	Others	Zingiberaceae	Pterospermum
bASV1892	7e5ff75c6888d43bf870104589e36d11	Bacteria	0.1359	-1709.34	-1716.09	0.000239271	0.0099317	bASV1892|uncultured_soil	Alphaproteobacteria	Sphingomonadales	Sphingomonadaceae	Novosphingobium	Magnoliopsida	Myrtales	Myrtaceae	Syzygium
bASV4022	90dec426adb6a986d6c6d538237e1274	Bacteria	7.33137e-05	-1672.73	-1672.73	1	1	bASV4022|Haliangium	Polyangia	Haliangiales	Haliangiaceae	Haliangium	NA	NA	Lamiaceae	Dypsis
bASV3772	d3e2a7ba655a87305567d51913654b46	Bacteria	7.33137e-05	-1621.31	-1621.31	1	1	bASV3772|Devosia	Alphaproteobacteria	Rhizobiales	Devosiaceae	Devosia	NA	NA	NA	NA
bASV3731	20cd8394aa2718b961fda84c0708fdf1	Bacteria	0.0547317	-1631.26	-1632.81	0.0789257	0.279888	bASV3731|uncultured_bacterium	Actinobacteria	Frankiales	Sporichthyaceae	Longivirga	NA	Lamiales	Acanthaceae	Alocasia
bASV131	b533db8bc33631736b7124ea959deb16	Bacteria	0.0855402	-1776.43	-1777.48	0.146631	0.414364	bASV131|67-14	Thermoleophilia	Solirubrobacterales	67-14	67-14	Magnoliopsida	Lamiales	Meliaceae	Alocasia
bASV4383	d888feafbcf1979ea6fc9cdf78513d9a	Bacteria	0.307865	-1666.14	-1670.86	0.00210637	0.0331263	bASV4383|uncultured_Verrucomicrobia	Verrucomicrobiae	Pedosphaerales	Pedosphaeraceae	Pedosphaeraceae	NA	Lamiales	Lamiaceae	Musa
bASV185	c91ef5f75b8e04d04060309aa2ec698e	Bacteria	7.33137e-05	-1799.43	-1799.42	1	1	bASV185|uncultured_Rubrobacteria	Thermoleophilia	Gaiellales	Gaiellaceae	Gaiella	NA	NA	Lamiaceae	Musa
bASV2374	5fdc8bf61092a55c870deb1d77c93ec7	Bacteria	0.0350466	-1691.46	-1692.42	0.166514	0.447786	bASV2374|Hyphomicrobium	Alphaproteobacteria	Rhizobiales	Hyphomicrobiaceae	Hyphomicrobium	NA	Sapindales	Urticaceae	Excoecaria
bASV2872	840232dc292a95f84bd3e0112a70aa8b	Bacteria	7.33137e-05	-1724.65	-1724.65	1	1	bASV2872|Ellin517	Verrucomicrobiae	Pedosphaerales	Pedosphaeraceae	Ellin517	NA	NA	Lamiaceae	NA
bASV1402	4f9cba25ba2412243c1d90647a951143	Bacteria	7.33137e-05	-1712.28	-1712.28	1	1	bASV1402|Occallatibacter	Acidobacteriae	Acidobacteriales	Acidobacteriaceae_(Subgroup_1)	Occallatibacter	NA	Malvales	Poaceae	Horsfieldia
bASV2553	a851f5130c0fbc15d98be296e98d600d	Bacteria	0.169162	-1615.4	-1621.92	0.000303879	0.011315	bASV2553|Aurantisolimonas	Bacteroidia	Chitinophagales	Chitinophagaceae	Aurantisolimonas	NA	Asparagales	Asparagaceae	Fagraea
bASV650	df9e86996c4dc86f4ea60253c192a0be	Bacteria	7.33137e-05	-1767.68	-1767.68	1	1	bASV650|uncultured_bacterium	AD3	AD3	AD3	AD3	Polypodiopsida	Others	Poaceae	Horsfieldia
bASV3155	4be25fb2a3ff6bd73f89b0eeaa089947	Bacteria	0.0373867	-1714.56	-1716.3	0.0615862	0.239554	bASV3155|uncultured_Polyangiaceae	Polyangia	Polyangiales	Sandaracinaceae		NA	Myrtales	Myrtaceae	Fagraea
bASV233	5973de80a5583c1c669af6b058ebcab6	Bacteria	7.33137e-05	-1809.77	-1809.77	1	1	bASV233|uncultured_forest	Alphaproteobacteria	Rhizobiales	Xanthobacteraceae		NA	NA	Lamiaceae	Horsfieldia
bASV407	e0f257323e6e32ba432d1df5b73bed65	Bacteria	0.132794	-1779.14	-1782.2	0.013384	0.0980014	bASV407|Xanthobacteraceae	Alphaproteobacteria	Rhizobiales	Xanthobacteraceae		NA	Sapindales	Meliaceae	Alocasia
bASV338	726fb8c4dee06a5cbf057d8a5187dd77	Bacteria	0.144855	-1809.56	-1813.4	0.00555305	0.0593263	bASV338|Acidobacteriales	Acidobacteriae	Acidobacteriales			NA	Others	Poaceae	Musa
bASV2003	fd5b3149313d49fc149951ecf72d0c84	Bacteria	0.0874167	-1727.63	-1729.07	0.0890897	0.301595	bASV2003|uncultured_Armatimonadetes	Fimbriimonadia	Fimbriimonadales	Fimbriimonadaceae	Fimbriimonadaceae	Liliopsida	Arecales	Arecaceae	Dypsis
bASV1685	c805288b65a9374ded1cb62fd8bbfcd3	Bacteria	0.0704481	-1726.19	-1727.94	0.0609844	0.239029	bASV1685|IMCC26256	Acidimicrobiia	IMCC26256	IMCC26256	IMCC26256	NA	Myrtales	Urticaceae	Alocasia
bASV2177	9adf3b9d8d1a35b8e68bfc732d2ce335	Bacteria	0.0233949	-1689.24	-1689.66	0.357709	0.73016	bASV2177|Subgroup_5	Subgroup_5	Subgroup_5	Subgroup_5	Subgroup_5	NA	NA	Urticaceae	Musa
bASV1097	b5d66e5d9ed73fb88d8822aa69f9abd7	Bacteria	0.0511661	-1758.86	-1760.27	0.0927425	0.310204	bASV1097|Planococcaceae	Bacilli	Bacillales	Planococcaceae		NA	Sapindales	Araliaceae	Brassaiopsis
bASV3524	566a9a8b1579a896f9ff7fabab93c8ac	Bacteria	0.0397505	-1666.69	-1667.63	0.170021	0.450306	bASV3524|uncultured_bacterium	Verrucomicrobiae	Pedosphaerales	Pedosphaeraceae	ADurb.Bin063-1	NA	NA	Urticaceae	Excoecaria
bASV2702	5f79b56de21b24caddfdd0b455073723	Bacteria	0.0619604	-1665.83	-1668.51	0.0205303	0.128254	bASV2702|SC-I-84	Gammaproteobacteria	Burkholderiales	SC-I-84	SC-I-84	NA	Arecales	Urticaceae	Alocasia
bASV1122	66e9fd1af6e11ff4bb2ab9929d4c606e	Bacteria	7.33137e-05	-1749.79	-1749.79	1	1	bASV1122|Elsterales	Alphaproteobacteria	Elsterales			Polypodiopsida	Asparagales	Asparagaceae	Lagerstroemia
bASV4411	0f2966a6a2276e5e7ea6ebef436fe7e2	Bacteria	0.0393353	-1663.34	-1664.73	0.0955538	0.317093	bASV4411|SM1A02	Phycisphaerae	Phycisphaerales	Phycisphaeraceae	SM1A02	NA	Asparagales	Araceae	Alocasia
bASV273	c7233cd8081e24a332e1d57bd8d95b6a	Bacteria	7.33137e-05	-1811.85	-1811.85	1	1	bASV273|Xanthobacteraceae	Alphaproteobacteria	Rhizobiales	Xanthobacteraceae		NA	NA	Zingiberaceae	Polyalthia
bASV1383	0c28cc301fce2f106c68eb6f38a48bd6	Bacteria	7.33137e-05	-1670.15	-1670.14	1	1	bASV1383|Nocardioides_simplex	Actinobacteria	Propionibacteriales	Nocardioidaceae	Nocardioides	NA	Myrtales	Asteraceae	Lagerstroemia
bASV1299	6202db1f15fa78a3b51f15144a3a748d	Bacteria	7.33137e-05	-1700.65	-1700.64	1	1	bASV1299|Rhodoplanes	Alphaproteobacteria	Rhizobiales	Xanthobacteraceae	Rhodoplanes	NA	Rosales	Asteraceae	Bauhinia
bASV1134	bababe6ace111f39dcc3f53cdc7810f7	Bacteria	0.0569124	-1773.31	-1774.82	0.082229	0.287846	bASV1134|Xanthobacteraceae	Alphaproteobacteria	Rhizobiales	Xanthobacteraceae		Polypodiopsida	Asparagales	Acanthaceae	Mycetia
bASV1740	f3f892cc161f2746101c8fe71283a275	Bacteria	7.33137e-05	-1685.18	-1685.18	1	1	bASV1740|uncultured_bacterium	Chloroflexia	Chloroflexales	Roseiflexaceae	Kouleothrix	NA	NA	NA	Mycetia
bASV3754	1180adf6fc8e36437478d4881dc6eeb7	Bacteria	0.0373871	-1665.6	-1665.74	0.593427	1	bASV3754|TK10	TK10	TK10	TK10	TK10	NA	Arecales	Lamiaceae	Polyalthia
bASV808	f4f3ca84ee420197d4301af9b7953177	Bacteria	0.0950887	-1775.73	-1780.57	0.0018527	0.0306603	bASV808|Anaeromyxobacter	Myxococcia	Myxococcales	Anaeromyxobacteraceae	Anaeromyxobacter	Pinopsida	Arecales	Myrtaceae	Fagraea
bASV2456	8db5168a97847b921972f72565db098c	Bacteria	0.0492081	-1704.49	-1706.01	0.0818581	0.28707	bASV2456|Sandaracinaceae	Polyangia	Polyangiales	Sandaracinaceae		NA	Arecales	Apocynaceae	Fagraea
bASV1652	1a0f73df66fb833414a8befe97baa74a	Bacteria	0.134044	-1726.76	-1727	0.487016	0.89747	bASV1652|uncultured_bacterium	Thermoleophilia	Solirubrobacterales	67-14	67-14	NA	Rosales	Urticaceae	Brassaiopsis
bASV2312	a95e31f2970fcc5e738a2eddf3714ac1	Bacteria	7.33137e-05	-1712.53	-1712.53	1	1	bASV2312|Paenibacillus	Bacilli	Paenibacillales	Paenibacillaceae	Paenibacillus	NA	NA	Urticaceae	Musa
bASV2120	bcb03ea1372b80cd09efa32062e4d825	Bacteria	0.00539122	-1620.9	-1620.97	0.711831	1	bASV2120|Kitasatospora	Actinobacteria	Streptomycetales	Streptomycetaceae	Kitasatospora	NA	NA	Acanthaceae	Alocasia
bASV37	074d76e66413bb13f340065bf05bf32c	Bacteria	7.33137e-05	-1642.76	-1642.76	1	1	bASV37|Allorhizobium-Neorhizobium-Pararhizobium-Rhizobium	Alphaproteobacteria	Rhizobiales	Rhizobiaceae	Allorhizobium-Neorhizobium-Pararhizobium-Rhizobium	NA	Fabales	Araliaceae	Brassaiopsis
bASV225	02bc0a70e286761ac6275a178025fc00	Bacteria	7.33137e-05	-1827.89	-1827.88	1	1	bASV225|Bradyrhizobium	Alphaproteobacteria	Rhizobiales	Xanthobacteraceae	Bradyrhizobium	Polypodiopsida	Others	Zingiberaceae	Musa
bASV1877	3e391b1a1d1da1f0bd4f14f1030c9d75	Bacteria	0.0345223	-1720.94	-1721.5	0.293043	0.634718	bASV1877|Rhodoplanes	Alphaproteobacteria	Rhizobiales	Xanthobacteraceae	Rhodoplanes	NA	Arecales	Myrtaceae	Fagraea
bASV512	650afe3d84ee16f906c17c736ff3a351	Bacteria	0.0980749	-1807.5	-1810.87	0.0093884	0.0797683	bASV512|SC-I-84	Gammaproteobacteria	Burkholderiales	SC-I-84	SC-I-84	NA	Rosales	Acanthaceae	Alocasia
bASV1377	f9ab0f7eae976f4ead64eab30abb0eaa	Bacteria	0.229538	-1759.75	-1764.66	0.00173098	0.0301155	bASV1377|Comamonadaceae	Gammaproteobacteria	Burkholderiales	Comamonadaceae		NA	Sapindales	Arecaceae	Fagraea
bASV965	d4001abd6ec57e6543aa2e88e587fbe0	Bacteria	0.13065	-1747.26	-1750.58	0.00998166	0.0825933	bASV965|Paracoccus	Alphaproteobacteria	Rhodobacterales	Rhodobacteraceae	Paracoccus	NA	NA	Meliaceae	Alocasia
bASV1509	b3b06ead1d4d9ff7dddfd00c78c2cab9	Bacteria	0.0238088	-1672.83	-1673.26	0.349855	0.721061	bASV1509|Chitinophagaceae	Bacteroidia	Chitinophagales	Chitinophagaceae		NA	Gentianales	Acanthaceae	Mycetia
bASV76	57ff974872e6b2b6cd17ee332d21cc7a	Bacteria	7.33137e-05	-1571.38	-1571.38	1	1	bASV76|Streptomyces	Actinobacteria	Streptomycetales	Streptomycetaceae	Streptomyces	NA	NA	Zingiberaceae	NA
bASV491	4cbc68abf32c907ed20c9893fd0e711f	Bacteria	7.33137e-05	-1796.11	-1796.11	1	1	bASV491|Comamonadaceae	Gammaproteobacteria	Burkholderiales	Comamonadaceae		NA	Arecales	Arecaceae	Fagraea
bASV3944	d79b4118bf36b48cf272b88a737d7ca0	Bacteria	0.1152	-1702.77	-1703.37	0.274165	0.605747	bASV3944|Pedosphaeraceae	Verrucomicrobiae	Pedosphaerales	Pedosphaeraceae	Pedosphaeraceae	NA	Rosales	Urticaceae	Alocasia
bASV617	1d1db24936ea9f00a65e6764dff111da	Bacteria	0.214531	-1745.21	-1752.28	0.000168642	0.00790744	bASV617|uncultured_bacterium	Dehalococcoidia	S085	S085	S085	NA	Sapindales	Lamiaceae	Dypsis
bASV311	aa24200e26d05d379fe3c640eb535d80	Bacteria	0.0462873	-1745.7	-1746.59	0.180435	0.465678	bASV311|Lysinibacillus	Bacilli	Bacillales	Planococcaceae	Lysinibacillus	Others	Asparagales	Myrtaceae	Fagraea
bASV1154	d3c07a00188780fdd3ceaf543ccf8dde	Bacteria	7.33137e-05	-1755.73	-1755.73	1	1	bASV1154|Tumebacillus	Bacilli	Alicyclobacillales	Alicyclobacillaceae	Tumebacillus	NA	Arecales	Myrtaceae	Pandanus
bASV3461	838ca5357f72f32663a55b5cd0773171	Bacteria	7.33137e-05	-1661.66	-1661.66	1	1	bASV3461|Chitinophagaceae	Bacteroidia	Chitinophagales	Chitinophagaceae		NA	NA	Urticaceae	Dypsis
bASV266	69b824c16e82cf06d6716617f15e6c7f	Bacteria	7.33137e-05	-1765.51	-1765.51	1	1	bASV266|Gemmatimonadaceae	Gemmatimonadetes	Gemmatimonadales	Gemmatimonadaceae		NA	NA	Meliaceae	Clerodendrum
bASV3872	98d22f244fccb8a21d657f4b28c2493a	Bacteria	0.22376	-1702.53	-1709.67	0.000156659	0.00762809	bASV3872|uncultured_Sphingomonadaceae	Alphaproteobacteria	Sphingomonadales	Sphingomonadaceae	Plot4-2H12	Polypodiopsida	Myrtales	Myrtaceae	Mycetia
bASV3312	0ff4b6264705ec19ec74e4b52c952414	Bacteria	0.0320557	-1648.33	-1649.36	0.151397	0.421713	bASV3312|Micromonosporaceae	Actinobacteria	Micromonosporales	Micromonosporaceae		NA	Myrtales	Myrtaceae	Alocasia
bASV4133	493715e1ae884ca98b764d1230ef316f	Bacteria	0.00181357	-1629.25	-1629.26	0.932067	1	bASV4133|Enterobacterales	Gammaproteobacteria	Enterobacterales			NA	Sapindales	NA	NA
bASV3483	d824205743ce86f2ee5b8ae39536ee40	Bacteria	0.0479645	-1661.99	-1662.26	0.462767	0.87247	bASV3483|uncultured_bacterium	MB-A2-108	MB-A2-108	MB-A2-108	MB-A2-108	NA	Lamiales	Lamiaceae	Fagraea
bASV923	edc6e0d1677a7cc8d92550bfb38a35ea	Bacteria	0.0704071	-1757.49	-1759.69	0.0358042	0.173671	bASV923|Dongia	Alphaproteobacteria	Dongiales	Dongiaceae	Dongia	NA	Myrtales	Apocynaceae	Dypsis
bASV4025	6e0ecf3127a5a1eca16a7d2f41123a7a	Bacteria	0.0140277	-1660.8	-1660.89	0.672128	1	bASV4025|Actinobacteria	Actinobacteria				NA	Lamiales	Urticaceae	Pterospermum
bASV1722	23fa64fe577d3f8580a9b504786470ab	Bacteria	0.00552505	-1702.52	-1702.6	0.69554	1	bASV1722|Gammaproteobacteria	Gammaproteobacteria				NA	Others	Poaceae	Horsfieldia
bASV5094	57be48985d5fe2fbe85a4641ad9fe7e7	Bacteria	0.0859455	-1612.8	-1618.28	0.000935631	0.0223197	bASV5094|Azorhizobium	Alphaproteobacteria	Rhizobiales	Xanthobacteraceae	Azorhizobium	NA	Gentianales	Apocynaceae	Mycetia
bASV1270	a315afc2e14b151a81a7ca0cb9edfacb	Bacteria	7.33137e-05	-1734.53	-1734.52	1	1	bASV1270|uncultured_bacterium	Acidobacteriae	Acidobacteriales	Koribacteraceae	Candidatus_Koribacter	NA	Others	Poaceae	Lagerstroemia
bASV4407	09a43f2b1daf05c016f066b07daca99e	Bacteria	7.33137e-05	-1682.96	-1682.96	1	1	bASV4407|uncultured_bacterium	TK10	TK10	TK10	TK10	NA	Arecales	Urticaceae	Dypsis
bASV331	20245bfb7a010a1fd50cce4a05611ee8	Bacteria	7.33137e-05	-1771.53	-1771.52	1	1	bASV331|uncultured_Acidimicrobiia	Acidimicrobiia	IMCC26256	IMCC26256	IMCC26256	NA	Gentianales	Moraceae	Fagraea
bASV3451	74a3521e8729b9f2ba2af1f205a36f17	Bacteria	0.0328654	-1629.11	-1630.57	0.0876042	0.298137	bASV3451|uncultured_soil	Verrucomicrobiae	Pedosphaerales	Pedosphaeraceae	Pedosphaeraceae	NA	Myrtales	Asteraceae	Alocasia
bASV3476	f12595427992b5f2e1a39019110c28b2	Bacteria	7.33137e-05	-1680.41	-1680.4	1	1	bASV3476|Flavobacterium	Bacteroidia	Flavobacteriales	Flavobacteriaceae	Flavobacterium	NA	Arecales	Myrtaceae	Alocasia
bASV1344	d0d01ad38cfc220763f14aaea2af8c13	Bacteria	7.33137e-05	-1749.41	-1749.41	1	1	bASV1344|uncultured_bacterium	MBNT15	MBNT15	MBNT15	MBNT15	NA	Malpighiales	Urticaceae	Mycetia
bASV737	b93fc81fa5a76378aa8119cab2ae82fa	Bacteria	0.0555357	-1764.11	-1767.5	0.00923101	0.0794997	bASV737|KF-JG30-B3	Alphaproteobacteria	Rhizobiales	KF-JG30-B3	KF-JG30-B3	Others	Rosales	Myrtaceae	Excoecaria
bASV2100	5bc4f2fe4834985bff04380047ae7dd2	Bacteria	0.000878921	-1690.1	-1690.1	0.966179	1	bASV2100|Xanthobacteraceae	Alphaproteobacteria	Rhizobiales	Xanthobacteraceae		NA	NA	Araceae	Alocasia
bASV3366	da1e3427de9d9865b625dbf06615b660	Bacteria	0.0926206	-1674.83	-1680.16	0.00110046	0.0236134	bASV3366|Nocardioides	Actinobacteria	Propionibacteriales	Nocardioidaceae	Nocardioides	NA	Rosales	Apocynaceae	Fagraea
bASV1659	3b988e1d902080ab53ba8a7900bfdc3c	Bacteria	0.0409222	-1721.42	-1722.74	0.103899	0.333734	bASV1659|Rubrobacter	Rubrobacteria	Rubrobacterales	Rubrobacteriaceae	Rubrobacter	NA	Myrtales	Myrtaceae	Fagraea
bASV1590	68fe21d5fc6e5a2612957ce8383d6301	Bacteria	0.31745	-1705.87	-1711.63	0.000686831	0.0188225	bASV1590|Nocardioides	Actinobacteria	Propionibacteriales	Nocardioidaceae	Nocardioides	NA	NA	Urticaceae	Begonia
bASV867	6a5130cb5fd183953c52d4fe6ce3a2da	Bacteria	0.00749018	-1760.51	-1760.63	0.62473	1	bASV867|Ideonella	Gammaproteobacteria	Burkholderiales	Comamonadaceae	Ideonella	NA	NA	Araceae	Alocasia
bASV50	1a7e2286d5117548afcd579a340dc3c1	Bacteria	7.33137e-05	-1717.24	-1717.23	1	1	bASV50|Subgroup_2	Acidobacteriae	Subgroup_2	Subgroup_2	Subgroup_2	Others	Others	Urticaceae	Musa
bASV893	131135ae4ae18f980d509556fc012464	Bacteria	7.33137e-05	-1747.27	-1747.26	1	1	bASV893|Gammaproteobacteria	Gammaproteobacteria				NA	NA	NA	NA
bASV1661	38a732d5396122b0bb4762217a43943a	Bacteria	7.33137e-05	-1723.57	-1723.57	1	1	bASV1661|uncultured_bacterium	Thermoleophilia				NA	Arecales	Myrtaceae	Pandanus
bASV649	02de91e5b832f82d6b7d4965690b40e0	Bacteria	0.0484416	-1778.18	-1779.91	0.0626915	0.241974	bASV649|Terrimonas	Bacteroidia	Chitinophagales	Chitinophagaceae	Terrimonas	NA	Rosales	Acanthaceae	Mycetia
bASV604	d1d3cd0cde6b6e9e6066f5e6ac3898c5	Bacteria	0.133237	-1788.78	-1792.25	0.0084828	0.0751852	bASV604|Microlunatus	Actinobacteria	Propionibacteriales	Propionibacteriaceae	Microlunatus	NA	Lamiales	Myrtaceae	Alocasia
bASV1260	66498c279f679a491eda9488beffecf4	Bacteria	0.0309909	-1741.22	-1742.85	0.0704487	0.260784	bASV1260|Rhodanobacteraceae	Gammaproteobacteria	Xanthomonadales	Rhodanobacteraceae		NA	Malvales	Malvaceae	Lagerstroemia
bASV208	6420d18e2042a3dae0a9d45d93fa6a14	Bacteria	0.0492465	-1800.65	-1801.33	0.241086	0.561572	bASV208|Gaiellales	Thermoleophilia	Gaiellales			NA	Arecales	Lamiaceae	Dypsis
bASV1264	222d9a9a4696ef1a9f24829044934865	Bacteria	7.33137e-05	-1723.86	-1723.86	1	1	bASV1264|Acidobacteriales	Acidobacteriae	Acidobacteriales			Polypodiopsida	Others	Lamiaceae	Musa
bASV3423	17f2dd7b7d35f50332b40e5d34937105	Bacteria	0.0233747	-1694.22	-1695.11	0.183446	0.470604	bASV3423|MND1	Gammaproteobacteria	Burkholderiales	Nitrosomonadaceae	MND1	Others	Arecales	NA	Lagerstroemia
bASV374	97b88d0d3498ea3d39208dc5310caa54	Bacteria	0.0599055	-1801.71	-1802.36	0.25458	0.579333	bASV374|uncultured_bacterium	Actinobacteria	Frankiales	Acidothermaceae	Acidothermus	Pinopsida	Others	Lamiaceae	Podocarpus
bASV1063	5c4fb4ac0a2aca0287f75c42950041c5	Bacteria	0.07782	-1764.18	-1765.57	0.0945365	0.314956	bASV1063|uncultured_bacterium	Actinobacteria	Propionibacteriales	Nocardioidaceae	Aeromicrobium	NA	Lamiales	Lamiaceae	NA
bASV606	304b839a45eeb6c30719c7862177fa5d	Bacteria	0.132011	-1772.89	-1774.07	0.125717	0.376127	bASV606|uncultured_bacterium	Thermoleophilia	Solirubrobacterales	Solirubrobacteraceae	Solirubrobacter	NA	Lamiales	Myrtaceae	NA
bASV3696	72d36c6a961368f991484fd05db3fd27	Bacteria	0.0907945	-1684.43	-1684.45	0.854397	1	bASV3696|Pedosphaeraceae	Verrucomicrobiae	Pedosphaerales	Pedosphaeraceae	Pedosphaeraceae	NA	Arecales	Acanthaceae	Begonia
bASV466	a27cb0565f2f38729fd28211ae80a2cc	Bacteria	0.00267266	-1587.76	-1587.78	0.857577	1	bASV466|Chryseobacterium	Bacteroidia	Flavobacteriales	Weeksellaceae	Chryseobacterium	NA	NA	Araceae	Brassaiopsis
bASV1825	82f77a9a9036ec180c5ed97fe514f7c5	Bacteria	7.33137e-05	-1663.12	-1663.12	1	1	bASV1825|Nocardioides	Actinobacteria	Propionibacteriales	Nocardioidaceae	Nocardioides	NA	Arecales	Arecaceae	Pandanus
bASV868	ab1a3c9bd950a25c2e2b02e3455c809a	Bacteria	0.0104608	-1754.01	-1754.11	0.663902	1	bASV868|uncultured_bacterium	Alphaproteobacteria	Micropepsales	Micropepsaceae		Polypodiopsida	Others	Poaceae	Horsfieldia
bASV1476	b8a7054673b8a54df3d374791d0807a6	Bacteria	7.33137e-05	-1780.38	-1780.38	1	1	bASV1476|Pedosphaeraceae	Verrucomicrobiae	Pedosphaerales	Pedosphaeraceae	Pedosphaeraceae	NA	Rosales	Myrtaceae	Brassaiopsis
bASV5486	ed3f9cbbb84239029dced7f113cf3d30	Bacteria	0.0641396	-1634.4	-1637.38	0.0147288	0.104757	bASV5486|uncultured_bacterium	NB1-j	NB1-j	NB1-j	NB1-j	NA	Myrtales	Myrtaceae	Codiaeum
bASV236	5ec6fb09296a45407261a91a849f2194	Bacteria	0.0276169	-1773.29	-1773.57	0.452495	0.860794	bASV236|Xanthobacteraceae	Alphaproteobacteria	Rhizobiales	Xanthobacteraceae		NA	Lamiales	Meliaceae	Dypsis
bASV2622	3e2094672e822a6db2926e119d94f569	Bacteria	7.33137e-05	-1670.27	-1670.26	1	1	bASV2622|uncultured_Syntrophobacterales	bacteriap25	bacteriap25	bacteriap25	bacteriap25	NA	NA	NA	Prunus
bASV3835	973b34bf4a86a14e2657b233786fa917	Bacteria	0.00592897	-1666.16	-1666.2	0.778866	1	bASV3835|metagenome	Thermoleophilia	Solirubrobacterales	67-14	67-14	NA	Arecales	Arecaceae	Fagraea
bASV1495	b82b45d19af4b3d1e2bc1c09a9b5762f	Bacteria	0.332833	-1744.49	-1751.96	0.000111518	0.00600772	bASV1495|Paenibacillus_alvei	Bacilli	Paenibacillales	Paenibacillaceae	Paenibacillus	NA	Lamiales	Acanthaceae	Brassaiopsis
bASV308	04825669bb18d35be84b4319c90086b8	Bacteria	0.0102444	-1762.43	-1762.55	0.630174	1	bASV308|Nordella	Alphaproteobacteria	Rhizobiales	Rhizobiales_Incertae_Sedis	Nordella	NA	Rosales	NA	Fagraea
bASV504	b95009f6ddfcadabf41fc9b74516f820	Bacteria	7.33137e-05	-1791.07	-1791.07	1	1	bASV504|Gaiellales	Thermoleophilia	Gaiellales			Others	NA	Urticaceae	Dypsis
bASV469	cfcf186ce013a750f7c91257e3093acd	Bacteria	0.0453148	-1754.55	-1755.48	0.173944	0.456698	bASV469|Intrasporangiaceae	Actinobacteria	Micrococcales	Intrasporangiaceae		Pinopsida	Myrtales	Apocynaceae	Fagraea
bASV271	c7b8dd41d448e0d223f31b3600c93464	Bacteria	0.0397974	-1804.84	-1806.68	0.0548917	0.22381	bASV271|Acidobacteriales	Acidobacteriae	Acidobacteriales			Others	Malvales	Poaceae	Horsfieldia
bASV630	9f85ae9fb0de6f3ebbb5efe09ac19be1	Bacteria	0.0704565	-1776.34	-1776.28	1	1	bASV630|Kribbella	Actinobacteria	Propionibacteriales	Nocardioidaceae	Kribbella	NA	NA	NA	Polyalthia
bASV1561	8c5772ca4bb34c3bff63eaad780b19ac	Bacteria	0.0587331	-1706.07	-1708.83	0.0188527	0.121627	bASV1561|uncultured_Firmicutes	TK10	TK10	TK10	TK10	Pinopsida	Myrtales	Myrtaceae	Fagraea
bASV3420	0890feea8e97487819a16375e8a84346	Bacteria	0.153959	-1650.63	-1650.64	0.894101	1	bASV3420|Gaiellales	Thermoleophilia	Gaiellales			NA	NA	Acanthaceae	Mycetia
bASV1626	1632a568b9727438b266033f99c6fee3	Bacteria	0.00507099	-1717.93	-1717.94	0.857396	1	bASV1626|MND1	Gammaproteobacteria	Burkholderiales	Nitrosomonadaceae	MND1	NA	Arecales	Myrtaceae	Dypsis
bASV2417	2b8cb621983050f272145db536097b02	Bacteria	7.33137e-05	-1730.69	-1730.69	1	1	bASV2417|uncultured_bacterium	Alphaproteobacteria	Caulobacterales	Hyphomonadaceae	SWB02	NA	NA	Urticaceae	Mycetia
bASV85	3658a7e08007f6da6004dff989f69058	Bacteria	0.00908846	-1593.43	-1593.55	0.627844	1	bASV85|Comamonadaceae	Gammaproteobacteria	Burkholderiales	Comamonadaceae		NA	NA	Urticaceae	Alocasia
bASV5331	09da1de967283a9866d2c630a663467c	Bacteria	0.0253533	-1608.22	-1608.81	0.276583	0.609493	bASV5331|uncultured_soil	Gammaproteobacteria	Burkholderiales	Rhodocyclaceae	Dechloromonas	NA	Myrtales	Myrtaceae	Dypsis
bASV774	dfc06b43e09fefd592d82865e2eb3371	Bacteria	7.33137e-05	-1792.72	-1792.71	1	1	bASV774|RCP2-54	RCP2-54	RCP2-54	RCP2-54	RCP2-54	Pinopsida	Others	Zingiberaceae	Musa
bASV594	0767e15e9fe0449ed452c7666766e4ac	Bacteria	0.0101363	-1731.94	-1732.04	0.663813	1	bASV594|Nocardioides	Actinobacteria	Propionibacteriales	Nocardioidaceae	Nocardioides	NA	NA	Apocynaceae	Pandanus
bASV3328	09018c28b31e5deaa17e0aa7a8ee5a3c	Bacteria	7.33137e-05	-1658.92	-1658.92	1	1	bASV3328|Elsterales	Alphaproteobacteria	Elsterales			NA	NA	Urticaceae	Alocasia
bASV2667	8fc7c8aa924172ebbc4ebdca61a5942d	Bacteria	7.33137e-05	-1694.39	-1694.38	1	1	bASV2667|uncultured_gamma	Gammaproteobacteria	Gammaproteobacteria_Incertae_Sedis	Unknown_Family	Acidibacter	NA	NA	Lamiaceae	Fagraea
bASV415	579abff67dfbeb12736ecf2f1a855f8c	Bacteria	0.00799206	-1810.86	-1810.89	0.808666	1	bASV415|Occallatibacter	Acidobacteriae	Acidobacteriales	Acidobacteriaceae_(Subgroup_1)	Occallatibacter	Others	Others	Zingiberaceae	Musa
bASV856	7f349dc8f10e04b86b46db61e929986d	Bacteria	0.131769	-1796.12	-1799.9	0.00597092	0.0624726	bASV856|uncultured_gamma	Gammaproteobacteria	Steroidobacterales	Steroidobacteraceae		NA	Myrtales	Myrtaceae	Fagraea
bASV5426	af6ab714215ae85d4e33d816217fa794	Bacteria	0.0634051	-1655.96	-1658.11	0.0383902	0.177555	bASV5426|uncultured_bacterium	Bacteroidia	Bacteroidales	SB-5	SB-5	NA	Myrtales	Myrtaceae	Fagraea
bASV3204	3d057d62fc49271f8fb34aac4fb1f84d	Bacteria	0.00909726	-1710.78	-1710.93	0.585345	1	bASV3204|uncultured_Polyangiaceae	Polyangia	Polyangiales	Polyangiaceae	Pajaroellobacter	NA	Malvales	Poaceae	Musa
bASV4871	c11e52f50feea70da608e24a01eeb031	Bacteria	0.0456077	-1676.22	-1677.96	0.0618697	0.240267	bASV4871|uncultured_bacterium	Gammaproteobacteria	CCM19a	CCM19a	CCM19a	NA	Myrtales	Myrtaceae	Mycetia
bASV566	e4328fdf38a3317d03adadcf7e68fa54	Bacteria	0.000335035	-1778.49	-1778.49	0.982369	1	bASV566|Mesorhizobium	Alphaproteobacteria	Rhizobiales	Rhizobiaceae	Mesorhizobium	NA	NA	NA	Mycetia
bASV1430	8c5e6f24a3a3d13694e189bb13568954	Bacteria	0.0464804	-1776.74	-1777.99	0.113915	0.354775	bASV1430|Subgroup_10	Thermoanaerobaculia	Thermoanaerobaculales	Thermoanaerobaculaceae	Subgroup_10	NA	Arecales	Myrtaceae	Pandanus
bASV888	8ae1b352d3a31cbf376659098fc30d94	Bacteria	7.33137e-05	-1750.6	-1750.59	1	1	bASV888|uncultured_bacterium	Chloroflexia	Chloroflexales	Roseiflexaceae		Others	NA	Poaceae	Podocarpus
bASV1733	f3b180f688ac94607496b7adcea1acf4	Bacteria	0.313131	-1683.63	-1687.51	0.00537534	0.058164	bASV1733|Gemmatimonadaceae	Gemmatimonadetes	Gemmatimonadales	Gemmatimonadaceae		NA	NA	Urticaceae	Begonia
bASV1599	87532eb27dfde36f7612b76c73746735	Bacteria	0.0359915	-1739.81	-1740.07	0.46457	0.873915	bASV1599|Nocardioides	Actinobacteria	Propionibacteriales	Nocardioidaceae	Nocardioides	NA	Myrtales	Myrtaceae	Pandanus
bASV2798	5e0725395907af92de790d81c94ec4ec	Bacteria	0.0966243	-1732.27	-1734.17	0.0510493	0.212244	bASV2798|uncultured_bacterium	Polyangia	Haliangiales	Haliangiaceae	Haliangium	NA	Myrtales	Myrtaceae	Bauhinia
bASV240	5ce18f265656217d74e973d8126ef4d7	Bacteria	0.126871	-1747.49	-1749.11	0.071619	0.26281	bASV240|Nocardioides	Actinobacteria	Propionibacteriales	Nocardioidaceae	Nocardioides	NA	Lamiales	Lamiaceae	Fagraea
bASV1981	072473989ee50e280efa53fd6b8fb425	Bacteria	0.0866229	-1689.39	-1691.34	0.0483109	0.205194	bASV1981|KF-JG30-B3	Alphaproteobacteria	Rhizobiales	KF-JG30-B3	KF-JG30-B3	Polypodiopsida	Arecales	Urticaceae	Dypsis
bASV3028	f6f5758f86c5d9a1f627d377e22fbe3a	Bacteria	0.0268542	-1654.99	-1655.73	0.222441	0.530396	bASV3028|TK10	TK10	TK10	TK10	TK10	NA	Rosales	Myrtaceae	Prunus
bASV7839	e8cdd99c5358a8c6981f478603a1a0f4	Bacteria	0.0202252	-1600.38	-1600.53	0.586341	1	bASV7839|Haliangium	Polyangia	Haliangiales	Haliangiaceae	Haliangium	NA	Malvales	Poaceae	NA
bASV4187	5c6d4f2ac6d8c67d19e08b22b3f31136	Bacteria	0.00221665	-1647.81	-1647.83	0.848449	1	bASV4187|Paenibacillus	Bacilli	Paenibacillales	Paenibacillaceae	Paenibacillus	NA	Lamiales	Acanthaceae	Alocasia
bASV1068	4ec64b9c85c4a4b0199749df821c7dea	Bacteria	0.0795253	-1779.83	-1782.02	0.0363979	0.174735	bASV1068|Devosia	Alphaproteobacteria	Rhizobiales	Devosiaceae	Devosia	Magnoliopsida	Gentianales	Myrtaceae	Mycetia
bASV815	d221fa8574db42e6adfd3274e28fa4f8	Bacteria	0.0429294	-1742.58	-1745.07	0.0255989	0.145328	bASV815|Methylobacterium-Methylorubrum	Alphaproteobacteria	Rhizobiales	Beijerinckiaceae	Methylobacterium-Methylorubrum	NA	NA	Acanthaceae	Mycetia
bASV5149	e93bf1baf18b7900579f028ab1329590	Bacteria	7.33137e-05	-1643.06	-1643.05	1	1	bASV5149|Roseomonas	Alphaproteobacteria	Acetobacterales	Acetobacteraceae	Roseomonas	NA	NA	Arecaceae	Fagraea
bASV1657	f9c18e012f409790506fa3e37ab99ea3	Bacteria	7.33137e-05	-1722.44	-1722.43	1	1	bASV1657|Streptomyces	Actinobacteria	Streptomycetales	Streptomycetaceae	Streptomyces	NA	NA	Poaceae	NA
bASV758	8e4ea32f2612e34d6f8e234c00ac411b	Bacteria	0.065815	-1764.42	-1766.99	0.0235075	0.137854	bASV758|AKYH767	Bacteroidia	Sphingobacteriales	AKYH767	AKYH767	NA	Myrtales	Myrtaceae	Bauhinia
bASV198	fa9a6a415f3b72a0d9d14e8d1c8d920b	Bacteria	0.0167888	-1656.85	-1657.09	0.491973	0.902663	bASV198|Reyranella	Alphaproteobacteria	Reyranellales	Reyranellaceae	Reyranella	NA	Fabales	Myrtaceae	Alocasia
bASV3739	17e8f94920ef1b4883e7c870c14728ca	Bacteria	7.33137e-05	-1692.5	-1692.5	1	1	bASV3739|uncultured_Pelobacter	Latescibacterota	Latescibacterota	Latescibacterota	Latescibacterota	NA	NA	NA	Pandanus
bASV1987	a9f951b267c41b266427d0c6786a1491	Bacteria	0.0646395	-1734.48	-1737.04	0.0235202	0.137854	bASV1987|Xanthobacteraceae	Alphaproteobacteria	Rhizobiales	Xanthobacteraceae		NA	Arecales	Acanthaceae	Alocasia
bASV2371	50390064e59d081d022f836975cb0732	Bacteria	0.00819983	-1675.73	-1675.94	0.521724	0.938882	bASV2371|Haliangium	Polyangia	Haliangiales	Haliangiaceae	Haliangium	NA	Malvales	NA	Musa
bASV3178	f9ab84847879f68ccd3bc8011de059fe	Bacteria	7.33137e-05	-1672.02	-1672.01	1	1	bASV3178|uncultured_bacterium	Lineage_IIa	Lineage_IIa	Lineage_IIa	Lineage_IIa	NA	NA	Apocynaceae	NA
bASV1247	6c79f5daf608424efef548860ea6a774	Bacteria	7.33137e-05	-1752.71	-1752.71	1	1	bASV1247|uncultured_bacterium	Actinobacteria	Frankiales	Acidothermaceae	Acidothermus	Polypodiopsida	NA	Urticaceae	Musa
bASV2364	aa0de83860a315e99351c7721885f61f	Bacteria	7.33137e-05	-1735.75	-1735.74	1	1	bASV2364|metagenome	Acidimicrobiia	Microtrichales	Microtrichales	Microtrichales	NA	Arecales	Urticaceae	Fagraea
bASV2270	a868b73eb35fdd9a0ad63d5ebf25aa08	Bacteria	7.33137e-05	-1727	-1726.99	1	1	bASV2270|MBNT15	MBNT15	MBNT15	MBNT15	MBNT15	NA	Malpighiales	Myrtaceae	Alocasia
bASV1003	a09ddb1090637f4959d501a3bcba4424	Bacteria	7.33137e-05	-1715.72	-1715.72	1	1	bASV1003|uncultured_bacterium	AD3	AD3	AD3	AD3	Others	Malvales	Poaceae	Lagerstroemia
bASV580	def6c378e24268c937430e4d02d6891d	Bacteria	0.0459284	-1795.62	-1797.23	0.0727699	0.265495	bASV580|Rhizobiaceae	Alphaproteobacteria	Rhizobiales	Rhizobiaceae		NA	Arecales	Myrtaceae	Alocasia
bASV3917	ce3bde1013786a4bba9201bde0b62be8	Bacteria	0.0601195	-1667.4	-1669.41	0.0452888	0.19703	bASV3917|metagenome	Alphaproteobacteria	Rhizobiales	Xanthobacteraceae	Rhodoplanes	NA	NA	Myrtaceae	Excoecaria
bASV476	d152cef9927a2eeb828da74b2d937d9d	Bacteria	7.33137e-05	-1772.78	-1772.77	1	1	bASV476|Allorhizobium-Neorhizobium-Pararhizobium-Rhizobium	Alphaproteobacteria	Rhizobiales	Rhizobiaceae	Allorhizobium-Neorhizobium-Pararhizobium-Rhizobium	NA	Myrtales	Asteraceae	Brassaiopsis
bASV479	3a2ef633160d7d14cabff4197a0d681f	Bacteria	0.0320525	-1815.02	-1815.62	0.273848	0.605705	bASV479|uncultured_Alphaproteobacteria	Alphaproteobacteria	Rhizobiales	Rhizobiales_Incertae_Sedis	Nordella	NA	Fabales	Myrtaceae	Pandanus
bASV1396	4168f7f293aac3a23c1c6246d2ef6318	Bacteria	0.0502773	-1749.7	-1750.53	0.199882	0.500101	bASV1396|Solirubrobacteraceae	Thermoleophilia	Solirubrobacterales	Solirubrobacteraceae		NA	Myrtales	Myrtaceae	Alocasia
bASV2084	ae7283c88db37d1a5f9c0c8bff3f23d8	Bacteria	7.33137e-05	-1727.55	-1727.55	1	1	bASV2084|Nocardioides	Actinobacteria	Propionibacteriales	Nocardioidaceae	Nocardioides	NA	Lamiales	Lamiaceae	NA
bASV2607	335a3ef719074cc18d8f67fd861acc48	Bacteria	0.104688	-1658.97	-1662.38	0.00907712	0.0789803	bASV2607|Frankia_sp.	Actinobacteria	Frankiales	Frankiaceae	Frankia	Magnoliopsida	Myrtales	Myrtaceae	Prunus
bASV775	3ed9afc7a5aa39e062b4a50d80b52c74	Bacteria	7.33137e-05	-1794.11	-1794.1	1	1	bASV775|Solirubrobacter	Thermoleophilia	Solirubrobacterales	Solirubrobacteraceae	Solirubrobacter	NA	Malpighiales	Myrtaceae	Alocasia
bASV3065	38f2cbc22323f205547b059265a7b006	Bacteria	0.0518187	-1698.96	-1700.24	0.109816	0.346349	bASV3065|uncultured_bacterium	Myxococcia	Myxococcales	Myxococcaceae	KD3-10	NA	Myrtales	Arecaceae	Fagraea
bASV756	c80268928b16801b7e95f8249f0cd2ca	Bacteria	7.33137e-05	-1786.15	-1786.15	1	1	bASV756|metagenome	bacteriap25	bacteriap25	bacteriap25	bacteriap25	NA	NA	Acanthaceae	NA
bASV3580	9bb04bcbbb2d47c630342c30df051e26	Bacteria	0.00216931	-1618.37	-1618.38	0.87592	1	bASV3580|Microscillaceae	Bacteroidia	Cytophagales	Microscillaceae		NA	Others	Poaceae	NA
bASV347	c8307044a1cc56dfa91cedec281112ae	Bacteria	0.00623008	-1776.05	-1776.17	0.624982	1	bASV347|Allorhizobium-Neorhizobium-Pararhizobium-Rhizobium	Alphaproteobacteria	Rhizobiales	Rhizobiaceae	Allorhizobium-Neorhizobium-Pararhizobium-Rhizobium	NA	Asparagales	Asteraceae	Mycetia
bASV5081	ff440877e7c659f4a9e81d0ed00fab50	Bacteria	0.00599536	-1612.25	-1612.33	0.686545	1	bASV5081|uncultured_bacterium	Gammaproteobacteria	Steroidobacterales	Steroidobacteraceae		NA	Lamiales	Lamiaceae	NA
bASV1371	8ca59f2d45cc443851a990ae6ac43760	Bacteria	0.0137532	-1732.36	-1732.41	0.751155	1	bASV1371|uncultured_Chloroflexi	AD3	AD3	AD3	AD3	Others	Arecales	Arecaceae	Bauhinia
bASV344	022432ded5a492629292e03f2a5df0e7	Bacteria	0.0207997	-1829.53	-1830.05	0.306599	0.658448	bASV344|uncultured_bacterium	Alphaproteobacteria	Rhizobiales	KF-JG30-B3	KF-JG30-B3	Magnoliopsida	Sapindales	Myrtaceae	Bauhinia
bASV1600	3bf9503230e136037caec5ec70bdea98	Bacteria	0.062905	-1720.21	-1723.02	0.0177259	0.118318	bASV1600|Comamonadaceae	Gammaproteobacteria	Burkholderiales	Comamonadaceae		NA	Arecales	Myrtaceae	Dypsis
bASV1664	1826da3e007e0a551ba7c2cd7a7322b6	Bacteria	7.33137e-05	-1743.2	-1743.2	1	1	bASV1664|Rhizobiales	Alphaproteobacteria	Rhizobiales			NA	NA	Urticaceae	Mycetia
bASV782	624aeaba157f29d34a6b414cc84b246e	Bacteria	0.0404602	-1795.12	-1795.62	0.317138	0.673558	bASV782|Acidobacteriales	Acidobacteriae	Acidobacteriales			Polypodiopsida	Others	Lamiaceae	Clerodendrum
bASV2781	c933c87a0939485aa4742601b622ea76	Bacteria	7.33137e-05	-1608.57	-1608.56	1	1	bASV2781|Dokdonella	Gammaproteobacteria	Xanthomonadales	Rhodanobacteraceae	Dokdonella	NA	NA	NA	NA
bASV1149	5a667793bc877962f836143ce48da179	Bacteria	0.0524444	-1757.84	-1760.13	0.0324307	0.166312	bASV1149|Rhizobiales	Alphaproteobacteria	Rhizobiales			Polypodiopsida	Myrtales	Myrtaceae	Alocasia
bASV6191	6970f68edeffc3db93f21ebb176cb7a8	Bacteria	0.0221038	-1639.2	-1639.3	0.64823	1	bASV6191|Acidobacteriales	Acidobacteriae	Acidobacteriales			NA	NA	Urticaceae	NA
bASV579	4677b2079cfe5bbf93b41c2d0ad9444c	Bacteria	0.0169309	-1770.75	-1770.85	0.662002	1	bASV579|Mycobacterium	Actinobacteria	Corynebacteriales	Mycobacteriaceae	Mycobacterium	NA	Arecales	Acanthaceae	NA
bASV1924	ab929cea25464b309bb2a198a90ccf17	Bacteria	0.00971351	-1741.61	-1741.74	0.61458	1	bASV1924|Pseudolabrys	Alphaproteobacteria	Rhizobiales	Xanthobacteraceae	Pseudolabrys	NA	NA	Myrtaceae	Alocasia
bASV1746	eb0a08b24b3b241974ef93c12ddb923a	Bacteria	7.33137e-05	-1723.68	-1723.68	1	1	bASV1746|SC-I-84	Gammaproteobacteria	Burkholderiales	SC-I-84	SC-I-84	NA	Arecales	Urticaceae	Lagerstroemia
bASV1880	b1b88d4ee71c576a1183ed34979f0dd8	Bacteria	7.33137e-05	-1628.71	-1628.71	1	1	bASV1880|Rhizobium_tibeticum	Alphaproteobacteria	Rhizobiales	Rhizobiaceae	Allorhizobium-Neorhizobium-Pararhizobium-Rhizobium	NA	NA	NA	Lagerstroemia
bASV1094	7e784dbaa5847bf185df165e11fc192a	Bacteria	0.101518	-1750.21	-1750.12	1	1	bASV1094|Rhizobiales_bacterium	Alphaproteobacteria	Rhizobiales	Xanthobacteraceae	Xanthobacteraceae	NA	Malvales	Poaceae	Lagerstroemia
bASV4897	80d8b2fd0a7f30140d028d3707b5416c	Bacteria	0.0409449	-1570.74	-1571.97	0.11634	0.359832	bASV4897|Rhodobacteraceae	Alphaproteobacteria	Rhodobacterales	Rhodobacteraceae		NA	NA	Acanthaceae	Alocasia
bASV314	8b1feb784790af9459bed1ae5bef93ae	Bacteria	7.33137e-05	-1746.42	-1746.41	1	1	bASV314|Comamonadaceae	Gammaproteobacteria	Burkholderiales	Comamonadaceae		NA	NA	Urticaceae	Alocasia
bASV2342	3ef9c894ab6c9c08018c8d40ab63450b	Bacteria	7.33137e-05	-1702.49	-1702.49	1	1	bASV2342|Candidatus_Solibacter	Acidobacteriae	Solibacterales	Solibacteraceae	Candidatus_Solibacter	Liliopsida	Arecales	Poaceae	Horsfieldia
bASV108	1b2504ab5a6cbad598df29927ec806af	Bacteria	0.0104021	-1613.41	-1613.64	0.494519	0.906021	bASV108|Variovorax	Gammaproteobacteria	Burkholderiales	Comamonadaceae	Variovorax	NA	Asparagales	Araliaceae	Brassaiopsis
bASV3764	24dcef9db90ed446a352010b840bbf3c	Bacteria	7.33137e-05	-1648.73	-1648.73	1	1	bASV3764|IMCC26256	Acidimicrobiia	IMCC26256	IMCC26256	IMCC26256	NA	NA	Araceae	Alocasia
bASV1665	b913515e2ebc1ccaa886c7c4f24a1ddc	Bacteria	7.33137e-05	-1653.71	-1653.71	1	1	bASV1665|Isoptericola	Actinobacteria	Micrococcales	Promicromonosporaceae	Isoptericola	NA	Asparagales	Myrtaceae	Alocasia
bASV591	240408b690425c4baf291ff7e91c397a	Bacteria	7.33137e-05	-1771.99	-1771.99	1	1	bASV591|Alcaligenaceae	Gammaproteobacteria	Burkholderiales	Alcaligenaceae		NA	NA	Urticaceae	Brassaiopsis
bASV842	4877ae52d4eb1433deb9d3f6d3521772	Bacteria	0.0586941	-1694.56	-1696.17	0.0719382	0.2636	bASV842|Streptomyces	Actinobacteria	Streptomycetales	Streptomycetaceae	Streptomyces	Others	Rosales	Lamiaceae	Brassaiopsis
bASV420	a77febb9808985ba181a5db3e31c52b6	Bacteria	0.291562	-1796.94	-1804.6	9.07336e-05	0.00570035	bASV420|Nitrospira	Nitrospiria	Nitrospirales	Nitrospiraceae	Nitrospira	Polypodiopsida	Sapindales	Araceae	Brassaiopsis
bASV1152	72a62df2392036fe00848d76e23ac92e	Bacteria	0.247237	-1755.7	-1759.33	0.00705949	0.0677408	bASV1152|Paenibacillus	Bacilli	Paenibacillales	Paenibacillaceae	Paenibacillus	NA	Lamiales	Acanthaceae	Brassaiopsis
bASV4894	9a10f5002f3ed0a7edfdbd794abe8139	Bacteria	7.33137e-05	-1626.84	-1626.84	1	1	bASV4894|uncultured_actinobacterium	Thermoleophilia	Solirubrobacterales	67-14	67-14	NA	NA	NA	NA
bASV583	728f82fc3aa95edd895721d01d2d08b1	Bacteria	0.051062	-1690.13	-1691.14	0.156321	0.43069	bASV583|Chryseobacterium	Bacteroidia	Flavobacteriales	Weeksellaceae	Chryseobacterium	NA	NA	Araceae	NA
bASV1466	3217fa057b8f1f71d57a262826460403	Bacteria	0.0032829	-1757.85	-1757.86	0.874848	1	bASV1466|Gemmatimonas	Gemmatimonadetes	Gemmatimonadales	Gemmatimonadaceae	Gemmatimonas	NA	Others	Zingiberaceae	Musa
bASV5703	77fd13ca6e32b00f47cb200823dcb969	Bacteria	7.33137e-05	-1641.65	-1641.65	1	1	bASV5703|uncultured_bacterium	Kryptonia	Kryptoniales	BSV26	BSV26	NA	NA	NA	Begonia
bASV5726	957136b67de1995b75839b8a0a0e0397	Bacteria	7.33137e-05	-1605.68	-1605.68	1	1	bASV5726|Abditibacterium	Abditibacteria	Abditibacteriales	Abditibacteriaceae	Abditibacterium	NA	Arecales	Myrtaceae	Caryota
bASV2759	4eeeec28a8da393e3f04b4744d5da8c9	Bacteria	0.0216584	-1651.22	-1652.24	0.15376	0.426886	bASV2759|Gaiellales	Thermoleophilia	Gaiellales			NA	Arecales	Myrtaceae	Fagraea
bASV1872	d560fc5ef1090b46b9491a4a17ae9a51	Bacteria	7.33137e-05	-1646.61	-1646.6	1	1	bASV1872|Bryobacter	Acidobacteriae	Bryobacterales	Bryobacteraceae	Bryobacter	NA	NA	NA	Horsfieldia
bASV1325	da51616194b0f71f0c73fbc521303dbd	Bacteria	0.0234354	-1738.97	-1739.47	0.315891	0.673012	bASV1325|Streptomyces	Actinobacteria	Streptomycetales	Streptomycetaceae	Streptomyces	NA	Lamiales	Araliaceae	Brassaiopsis
bASV2271	9d361c1c114697868188ff8ee5e5a01d	Bacteria	0.0341237	-1725.43	-1726.64	0.120612	0.367054	bASV2271|mle1-7	Gammaproteobacteria	Burkholderiales	Nitrosomonadaceae	mle1-7	NA	Arecales	Asparagaceae	Fagraea
bASV1417	16f7341d8ff37a64ec46be3097499f4b	Bacteria	0.03733	-1740.66	-1741.15	0.321809	0.679016	bASV1417|uncultured_Methylocystaceae	Alphaproteobacteria	Rhizobiales	Xanthobacteraceae		Polypodiopsida	Arecales	Urticaceae	Horsfieldia
bASV84	0dff7a29891c69c8a7d3702bca915f18	Bacteria	0.00227529	-1769.74	-1769.76	0.830499	1	bASV84|Enterobacterales	Gammaproteobacteria	Enterobacterales			Pinopsida	NA	Asteraceae	Polyalthia
bASV984	83db73cff4ff41ae9f7a30c0bf52bf17	Bacteria	0.125463	-1778.8	-1782.43	0.00706026	0.0677408	bASV984|IS-44	Gammaproteobacteria	Burkholderiales	Nitrosomonadaceae	IS-44	NA	NA	Urticaceae	Alocasia
bASV689	13de67887252b4bf2ba9c78cda192dfa	Bacteria	0.219704	-1764.34	-1764.92	0.283252	0.618271	bASV689|Xanthobacteraceae	Alphaproteobacteria	Rhizobiales	Xanthobacteraceae		Others	Others	Poaceae	Musa
bASV1342	30bef40df8b7676dd3866c895755d3fd	Bacteria	0.0305258	-1744.87	-1745.36	0.318869	0.675063	bASV1342|Pseudonocardiaceae	Actinobacteria	Pseudonocardiales	Pseudonocardiaceae		NA	Asparagales	Asparagaceae	Fagraea
bASV2259	764e3cc34c822c31a481e8b6215a019f	Bacteria	7.33137e-05	-1707.89	-1707.89	1	1	bASV2259|uncultured_bacterium	Alphaproteobacteria	Rhizobiales	Rhizobiales_Incertae_Sedis		NA	NA	Urticaceae	Alocasia
bASV1679	d7383231391222089647828e869a9b86	Bacteria	0.031649	-1725.39	-1726.72	0.102275	0.33107	bASV1679|uncultured_Holophaga	Thermoanaerobaculia	Thermoanaerobaculales	Thermoanaerobaculaceae	Subgroup_10	NA	Arecales	Myrtaceae	Bauhinia
bASV204	bd189c1a728dc63a31ca48e42eb04be0	Bacteria	0.0020359	-1774.24	-1774.26	0.878696	1	bASV204|Aeromonas	Gammaproteobacteria	Aeromonadales	Aeromonadaceae	Aeromonas	NA	Arecales	Myrtaceae	Fagraea
bASV531	7a3f84e1f41c1420ff3eda36d6b6c7ff	Bacteria	0.0121222	-1778.35	-1778.61	0.473693	0.879359	bASV531|Gemmatimonadaceae	Gemmatimonadetes	Gemmatimonadales	Gemmatimonadaceae		Pinopsida	Lamiales	Urticaceae	Bauhinia
bASV4332	aa33cda6728497f9c2f30dcde099c8e0	Bacteria	7.33137e-05	-1658.99	-1658.98	1	1	bASV4332|Bauldia	Alphaproteobacteria	Rhizobiales	Rhizobiales_Incertae_Sedis	Bauldia	NA	NA	Urticaceae	Mycetia
bASV3297	8dbcd2d2946c6da2a7e21ae20f0726a6	Bacteria	0.307168	-1659.55	-1665.6	0.000507682	0.015303	bASV3297|Pedomicrobium	Alphaproteobacteria	Rhizobiales	Hyphomicrobiaceae	Pedomicrobium	NA	Sapindales	Lamiaceae	NA
bASV3883	e67d1fd756cef7f48195f95385ff9949	Bacteria	7.33137e-05	-1673.34	-1673.34	1	1	bASV3883|beta_proteobacterium	Gammaproteobacteria	Burkholderiales	Nitrosomonadaceae	Ellin6067	NA	NA	NA	NA
bASV5342	a664d206cdb70df6ad2cb9da55bf90a5	Bacteria	7.33137e-05	-1654.77	-1654.77	1	1	bASV5342|uncultured_soil	NB1-j	NB1-j	NB1-j	NB1-j	NA	NA	NA	NA
bASV207	66570467f806a15457f41691b441fb5a	Bacteria	0.127528	-1642.9	-1646.12	0.0111277	0.0872991	bASV207|uncultured_bacterium	Myxococcia	Myxococcales	Vulgatibacteraceae	Vulgatibacter	NA	Sapindales	Urticaceae	Fagraea
bASV1073	d11bccba47eeaf3a6438de116663b860	Bacteria	0.0376205	-1743.98	-1745.02	0.149835	0.41922	bASV1073|Nocardioides	Actinobacteria	Propionibacteriales	Nocardioidaceae	Nocardioides	NA	Arecales	Arecaceae	Fagraea
bASV576	62166c6dad2cd90c1ac3505241d9aead	Bacteria	0.0452479	-1791	-1793.19	0.0364376	0.174735	bASV576|Steroidobacteraceae	Gammaproteobacteria	Steroidobacterales	Steroidobacteraceae		NA	Arecales	Myrtaceae	Syzygium
bASV1121	6192c792fec61724867c230104c97b3d	Bacteria	0.204794	-1699.82	-1709.18	1.51531e-05	0.00153471	bASV1121|Alphaproteobacteria	Alphaproteobacteria				NA	Malvales	Lauraceae	Magnolia
bASV3422	dd5406ad4ba81fb3b259f29d79252d1f	Bacteria	0.00827641	-1688.21	-1688.32	0.641525	1	bASV3422|uncultured_bacterium	Alphaproteobacteria	Rhizobiales	Pleomorphomonadaceae	Chthonobacter	NA	Myrtales	Myrtaceae	Alocasia
bASV1131	5205f12df2808e8c1620486a80f5f432	Bacteria	7.33137e-05	-1758.28	-1758.28	1	1	bASV1131|uncultured_bacterium	Gammaproteobacteria	Burkholderiales	Nitrosomonadaceae	mle1-7	NA	NA	Myrtaceae	Alocasia
bASV58	4e0abf0955a610c0b526bfe83f48878e	Bacteria	7.33137e-05	-1811.45	-1811.45	1	1	bASV58|Bacillus	Bacilli	Bacillales	Bacillaceae	Bacillus	NA	Lamiales	Acanthaceae	Pandanus
[truncated: 562 more rows]

## Sheet: Table S7B
ASVID	FeatureID	Kingdom	lambda	logL	logL0	P	FDR	ASVLabel	Class	Order	Family	Genus	Tree_Class	Tree_Order	Tree_Family	Tree_Genus
[truncated: 1,085 more rows]

## Sheet: Table S7C
ASVID	FeatureID	Kingdom	lambda	logL	logL0	P	FDR	ASVLabel	Class	Order	Family	Genus	Tree_Class	Tree_Order	Tree_Family	Tree_Genus
[truncated: 787 more rows]

[truncated: 3 more sheets: Table S7D, Table S7E, Table S7F]
