# Supplementary material for: A quantitative microbiome atlas reveals hidden diversity, eukaryotic keystones, and evolutionary trade-offs in plant rhizospheres
Source: Research Square preprint supplement (doi:10.21203/rs.3.rs-7503976/v1), 2025-09-12
Supplement: Supplementary file 4 [file 383221abfe574f7a47ea4eb5.xlsx]

## Sheet: Table S5A
Supplementary Information Table 5: Profiles of metagenome-assembled Species-Level Genome Bins (SGBs) from rhizospheres and Biosynthetic Gene Clusters (BGCs) identified from SGBs. (A) Quality statistics, phylogenetic classification, and genome size of 8,799 SGBs from rhizospheres. This table catalogs the 71,367 metagenome-assembled genomes (MAGs) reconstructed from rhizosphere samples, consolidate…
SGBID	RepSGB	Domain	Phylum	Class	Order	Family	Genus	Species	Contigs number	Largest contig	Total length	GC(%)	N50	Completeness	Contamination	BGC number
SGB0001	MH16.bins013.maxbin	Bacteria	Proteobacteria	Alphaproteobacteria	Sphingomonadales	Sphingomonadaceae	Sandaracinobacter	Unassign	104	211715	3335109	64.84	78254	96.42	4.58	10
SGB0002	MH16.bins015.maxbin	Bacteria	Proteobacteria	Alphaproteobacteria	Sphingomonadales	Sphingomonadaceae	Sphingobium	Unassign	41	312635	2906103	57.49	108787	95.29	0.85	1
SGB0003	MH16.bins017.maxbin	Bacteria	Actinobacteriota	Actinomycetia	Propionibacteriales	Propionibacteriaceae	Propionicimonas	Unassign	161	86173	1789473	65.42	17414	58.81	0.86	12
SGB0004	MH16.bins028.maxbin	Bacteria	Proteobacteria	Alphaproteobacteria	Rhodobacterales	Rhodobacteraceae	Gemmobacter	Unassign	142	137928	3444035	66.25	34950	83.1	0	0
SGB0005	MH16.bins040.maxbin	Bacteria	Proteobacteria	Gammaproteobacteria	Burkholderiales	Neisseriaceae	Vitreoscilla	Unassign	53	520429	3106659	49.19	97568	99.57	0.81	7
SGB0006	MH16.bins045.maxbin	Bacteria	Proteobacteria	Gammaproteobacteria	Enterobacterales	Aeromonadaceae	Aeromonas	Unassign	92	274704	4572619	62.06	82779	97.04	1.46	28
SGB0007	MH16.bins053.maxbin	Bacteria	Proteobacteria	Gammaproteobacteria	Enterobacterales	Enterobacteriaceae	Citrobacter	Citrobacter europaeus	277	78969	3178755	53.35	17403	59.36	2.2	0
SGB0008	MH16.bins076.maxbin	Bacteria	Actinobacteriota	Actinomycetia	Actinomycetales	Microbacteriaceae	73-13	Unassign	195	42045	1565364	70.81	11491	60.05	1.6	0
SGB0009	MH16.bins101.maxbin	Bacteria	Actinobacteriota	Actinomycetia	Mycobacteriales	Mycobacteriaceae	Rhodococcus	Rhodococcus qingshengii	444	79243	4931187	62.75	16448	79.7	1.43	30
SGB0010	MH16.bins125.maxbin	Bacteria	Proteobacteria	Alphaproteobacteria	Micropepsales	Micropepsaceae	UBA2784	Unassign	320	60233	2849649	65.16	12376	70.14	8.62	0
SGB0011	MH16.bins130.maxbin	Bacteria	Actinobacteriota	Actinomycetia	Mycobacteriales	Nakamurellaceae	Nakamurella	Unassign	1468	20971	5863760	71.2	4278	59.8	3.45	0
SGB0012	MH16.bins131.maxbin	Bacteria	Proteobacteria	Alphaproteobacteria	Rhodobacterales	Rhodobacteraceae	Pseudogemmobacter	Unassign	298	66943	3014865	67.68	15179	55.33	0	0
SGB0013	MH16.bins250.maxbin	Bacteria	Bacteroidota	Bacteroidia	Cytophagales	Spirosomaceae	Leadbetterella	Unassign	544	13772	2006644	39.5	3726	52.38	2.06	0
SGB0014	MH16_bin1.metabat2	Bacteria	Bacteroidota	Bacteroidia	Flavobacteriales	Flavobacteriaceae	Flavobacterium	Unassign	217	70539	2962586	34.19	18511	95.38	0.7	3
SGB0015	MH16_bin100.metabat2	Bacteria	Actinobacteriota	Actinomycetia	Actinomycetales	Microbacteriaceae	Microbacterium	Unassign	216	85748	4136617	67.85	28439	96.19	9.38	7
SGB0016	MH16_bin107.metabat2	Bacteria	Chlamydiota	Chlamydiia	Chlamydiales	Parachlamydiaceae	JACDGH01	Unassign	276	37975	2639135	38.92	11134	91.55	4.12	38
SGB0017	MH16_bin109.metabat2	Bacteria	Actinobacteriota	Actinomycetia	Mycobacteriales	Nakamurellaceae	Nakamurella	Unassign	385	77252	4746769	69.41	17419	89.42	2.08	9
SGB0018	MH16_bin11.metabat2	Bacteria	Proteobacteria	Gammaproteobacteria	Enterobacterales	Enterobacteriaceae	Pectobacterium	Pectobacterium aroidearum	269	90252	4232200	52.28	21387	95.16	2.3	24
SGB0019	MH16_bin111.metabat2	Bacteria	Actinobacteriota	Actinomycetia	Actinomycetales	Cellulomonadaceae	Flavimobilis	Flavimobilis sp011300875	265	56475	3300623	72.27	17558	95.91	5.47	5
SGB0020	MH16_bin112.metabat2	Bacteria	Proteobacteria	Alphaproteobacteria	Rhodobacterales	Rhodobacteraceae	Paenirhodobacter	Unassign	72	277185	3300558	59.47	73958	91.94	0.61	3
SGB0021	MH16_bin114.metabat2	Bacteria	Patescibacteria	Saccharimonadia	Saccharimonadales	UBA1547	UBA6175	Unassign	12	218671	908477	49.08	117896	70.69	0	1
SGB0022	MH16_bin118.metabat2	Bacteria	Bacteroidota	Bacteroidia	Flavobacteriales	Flavobacteriaceae	Flavobacterium	Unassign	460	41777	3425354	32.93	10097	90.5	1.45	2
SGB0023	MH16_bin12.metabat2	Bacteria	Proteobacteria	Alphaproteobacteria	Rhodobacterales	Rhodobacteraceae	Rhodobacter_F	Unassign	593	90474	4497132	62.63	8547	79.47	6.08	0
SGB0024	MH16_bin122.metabat2	Bacteria	Proteobacteria	Gammaproteobacteria	Pseudomonadales	Pseudomonadaceae	Azotobacter	Azotobacter vinelandii	334	83165	4822293	66.22	19675	89.29	4.68	42
SGB0025	MH16_bin123.metabat2	Bacteria	Patescibacteria	Saccharimonadia	Saccharimonadales	UBA1547	Unassign	Unassign	4	455787	905394	46.34	455787	66.38	2.56	0
SGB0026	MH16_bin125.metabat2	Bacteria	Verrucomicrobiota	Verrucomicrobiae	Verrucomicrobiales	Akkermansiaceae	Luteolibacter	Unassign	189	149563	5635861	60.97	44335	98.24	2.04	0
SGB0027	MH16_bin127.metabat2	Bacteria	Proteobacteria	Gammaproteobacteria	Burkholderiales	Burkholderiaceae	JAGOEY01	Unassign	352	87433	4511091	64.09	20790	93.83	5.88	3
SGB0028	MH16_bin129.metabat2	Bacteria	Verrucomicrobiota	Verrucomicrobiae	Verrucomicrobiales	Akkermansiaceae	Luteolibacter	Unassign	312	202306	4408940	59.49	19016	92.76	1.36	0
SGB0029	MH16_bin130.metabat2	Bacteria	Actinobacteriota	Actinomycetia	Propionibacteriales	Nocardioidaceae	Aeromicrobium	Unassign	224	104680	3181964	68.52	20498	90.86	3.02	20
SGB0030	MH16_bin131.metabat2	Bacteria	Proteobacteria	Gammaproteobacteria	Xanthomonadales	UBA2363	Pseudofulvimonas	Unassign	62	244119	3546602	64.94	105717	98.71	4.08	2
SGB0031	MH16_bin133.metabat2	Bacteria	Bacteroidota	Kapabacteria	OLB7	OLB7	Unassign	Unassign	468	21289	2421134	62.57	5572	62.25	1.37	0
SGB0032	MH16_bin139.metabat2	Bacteria	Firmicutes_C	Negativicutes	Propionisporales	Propionisporaceae	Pelosinus	Unassign	543	67162	5370494	39.16	13450	60.34	1.72	51
SGB0033	MH16_bin141.metabat2	Bacteria	Proteobacteria	Gammaproteobacteria	Burkholderiales	Casimicrobiaceae	Unassign	Unassign	226	158356	3541461	55.45	21166	74.14	0	4
SGB0034	MH16_bin142.metabat2	Bacteria	Planctomycetota	Planctomycetia	Pirellulales	Lacipirellulaceae	Botrimarina	Unassign	535	57319	4647472	63.05	10659	84.2	2.3	1
SGB0035	MH16_bin143.metabat2	Bacteria	Actinobacteriota	Actinomycetia	Propionibacteriales	Propionibacteriaceae	Propionicimonas	Unassign	236	86173	3311007	66.13	19683	88.77	0.17	6
SGB0036	MH16_bin147.metabat2	Bacteria	Proteobacteria	Alphaproteobacteria	Caulobacterales	Caulobacteraceae	Brevundimonas	Unassign	390	22382	2536322	67.45	7502	77.39	0.57	0
SGB0037	MH16_bin149.metabat2	Bacteria	Firmicutes	Bacilli	Erysipelotrichales	Erysipelotrichaceae	Erysipelothrix	Unassign	113	128188	2109553	35.44	25771	79.31	6.03	1
SGB0038	MH16_bin15.metabat2	Bacteria	Armatimonadota	Armatimonadia	Armatimonadales	Armatimonadaceae	Armatimonas	Unassign	586	33110	4207327	56.02	8022	67.59	0	0
SGB0039	MH16_bin150.metabat2	Bacteria	Actinobacteriota	Actinomycetia	Mycobacteriales	Nakamurellaceae	Nakamurella	Unassign	600	56159	5060337	69.56	10608	60.69	1.72	11
SGB0040	MH16_bin151.metabat2	Bacteria	Actinobacteriota	Actinomycetia	Actinomycetales	Microbacteriaceae	Microbacterium	Unassign	599	35358	4252839	65.53	8393	85.26	7.61	1
SGB0041	MH16_bin153.metabat2	Bacteria	Proteobacteria	Gammaproteobacteria	Pseudomonadales	Pseudomonadaceae	Pseudomonas_E	Pseudomonas_E sichuanensis	574	61780	5071478	64.24	11547	72.47	4.05	9
SGB0042	MH16_bin157.metabat2	Bacteria	Actinobacteriota	Acidimicrobiia	Acidimicrobiales	JAAYBP01	Aquihabitans	Unassign	651	29758	3565942	71.93	6088	66.1	1.28	0
SGB0043	MH16_bin16.metabat2	Bacteria	Proteobacteria	Alphaproteobacteria	Caulobacterales	Caulobacteraceae	Brevundimonas	Unassign	115	113634	2799536	64.86	38845	93.12	2.37	31
SGB0044	MH16_bin161.metabat2	Bacteria	Proteobacteria	Alphaproteobacteria	Rhodobacterales	Rhodobacteraceae	Amaricoccus	Unassign	648	31313	3938454	70.29	6598	56.55	4.31	37
SGB0045	MH16_bin164.metabat2	Bacteria	Proteobacteria	Gammaproteobacteria	Burkholderiales	Burkholderiaceae	Methylibium	Methylibium sp001425905	535	32576	3014402	69.57	6233	57.76	3.45	1
SGB0046	MH16_bin166.metabat2	Bacteria	Actinobacteriota	Actinomycetia	Propionibacteriales	Nocardioidaceae	Aeromicrobium	Unassign	526	25099	3205337	67.36	6869	80.33	1.28	0
SGB0047	MH16_bin17.metabat2	Bacteria	Proteobacteria	Alphaproteobacteria	RF32	CAG-239	Unassign	Unassign	56	106116	1489511	36.47	36765	96.77	1.08	0
SGB0048	MH16_bin170.metabat2	Bacteria	Proteobacteria	Alphaproteobacteria	Rhodobacterales	Rhodobacteraceae	Haematobacter	Unassign	66	204224	3419279	64.9	83461	97.19	1.21	0
SGB0049	MH16_bin173.metabat2	Bacteria	Bacteroidota	Bacteroidia	Bacteroidales	Dysgonomonadaceae	Dysgonomonas	Unassign	216	100498	3069262	35.65	26569	78.69	3.37	0
SGB0050	MH16_bin175.metabat2	Bacteria	Bacteroidota	Bacteroidia	Sphingobacteriales	Sphingobacteriaceae	Sphingobacterium	Unassign	478	81701	4405989	40.51	12204	72.24	4.53	0
SGB0051	MH16_bin177.metabat2	Bacteria	Actinobacteriota	Actinomycetia	Actinomycetales	Microbacteriaceae	Mycetocola_A	Unassign	168	71928	2908011	65.34	23645	96.03	2.12	37
SGB0052	MH16_bin183.metabat2	Bacteria	Proteobacteria	Gammaproteobacteria	Pseudomonadales	Cellvibrionaceae	Cellvibrio	Unassign	148	105734	3149817	53.4	34561	95.16	0.27	6
SGB0053	MH16_bin185.metabat2	Bacteria	Proteobacteria	Gammaproteobacteria	Xanthomonadales	Xanthomonadaceae	Chiayiivirga	Unassign	160	112147	4513295	65.72	42379	98.28	3.1	3
SGB0054	MH16_bin186.metabat2	Bacteria	Proteobacteria	Alphaproteobacteria	Sphingomonadales	Sphingomonadaceae	Sphingobium	Unassign	80	206414	3410263	63.58	65896	97.59	1.25	9
SGB0055	MH16_bin187.metabat2	Bacteria	Bacteroidota	Bacteroidia	Flavobacteriales	Flavobacteriaceae	Flavobacterium	Unassign	276	52209	3244069	39.84	15650	80.69	1.72	3
SGB0056	MH16_bin189.metabat2	Bacteria	Actinobacteriota	Thermoleophilia	Solirubrobacterales	1970-09-01	67-14	Unassign	153	117546	3020359	62.55	27674	96.12	4.89	1
SGB0057	MH16_bin192.metabat2	Bacteria	Bacteroidota	Bacteroidia	Bacteroidales	Dysgonomonadaceae	Dysgonomonas	Unassign	112	175959	3610998	36.01	52927	96.34	1.09	0
SGB0058	MH16_bin193.metabat2	Bacteria	Firmicutes	Bacilli	Bacillales	Bacillaceae_G	Bacillus_A	Bacillus_A thuringiensis	149	164727	4670915	35.37	48174	78.57	0	43
SGB0059	MH16_bin194.metabat2	Bacteria	Proteobacteria	Gammaproteobacteria	Burkholderiales	Burkholderiaceae	Lampropedia	Unassign	65	236550	3047405	54.17	78451	88.06	0.47	15
SGB0060	MH16_bin199.metabat2	Bacteria	Bacteroidota	Bacteroidia	Flavobacteriales	Flavobacteriaceae	Flavobacterium	Unassign	141	115157	3369211	35.98	34053	96.31	0.71	7
SGB0061	MH16_bin203.metabat2	Bacteria	Actinobacteriota	Actinomycetia	Propionibacteriales	Propionibacteriaceae	Propionicimonas	Unassign	442	27313	2773029	68.18	7027	50.16	0	6
SGB0062	MH16_bin208.metabat2	Bacteria	Actinobacteriota	Actinomycetia	Actinomycetales	Demequinaceae	Demequina	Unassign	283	45237	2373016	67.8	10612	83.14	1.35	2
SGB0063	MH16_bin209.metabat2	Bacteria	Proteobacteria	Alphaproteobacteria	Caulobacterales	Hyphomonadaceae	UBA7672	Unassign	261	110144	3856236	64.32	24328	83.87	7.07	0
SGB0064	MH16_bin210.metabat2	Bacteria	Bacteroidota	Bacteroidia	Flavobacteriales	Weeksellaceae	Empedobacter	Empedobacter tilapiae	58	86314	1654900	30.99	36314	66.67	0	0
SGB0065	MH16_bin214.metabat2	Bacteria	Actinobacteriota	Actinomycetia	Actinomycetales	Microbacteriaceae	Leucobacter	Unassign	247	46043	2892327	65.62	16219	90.61	0.58	9
SGB0066	MH16_bin216.metabat2	Bacteria	Bacteroidota	Bacteroidia	Flavobacteriales	UA16	UBA4660	Unassign	30	587537	3747807	40.86	194409	99.46	1.08	1
SGB0067	MH16_bin217.metabat2	Bacteria	Chloroflexota	Chloroflexia	Thermomicrobiales	UBA6265	JACCYX01	Unassign	561	50336	3958668	63.11	8976	86.32	0.38	0
SGB0068	MH16_bin219.metabat2	Bacteria	Bacteroidota	Bacteroidia	Chitinophagales	Chitinophagaceae	Ferruginibacter	Unassign	354	18049	1460461	34.91	4175	52.18	1.48	0
SGB0069	MH16_bin223.metabat2	Bacteria	Firmicutes_C	Negativicutes	Selenomonadales	Massilibacillaceae	Massilibacillus	Unassign	345	45098	2727226	36.54	9891	57.01	3.45	0
SGB0070	MH16_bin23.metabat2	Bacteria	Proteobacteria	Gammaproteobacteria	Burkholderiales	Rhodocyclaceae	Azonexus	Unassign	82	215634	3624745	63.85	62321	96.29	1.11	3
SGB0071	MH16_bin230.metabat2	Bacteria	Proteobacteria	Alphaproteobacteria	Caulobacterales	Caulobacteraceae	Brevundimonas	Unassign	152	105447	3098208	67.25	41944	96.94	3.94	29
SGB0072	MH16_bin234.metabat2	Bacteria	Proteobacteria	Alphaproteobacteria	Rhizobiales	Rhizobiaceae	Rhizobium_B	Unassign	229	102040	4008981	59.24	28315	62.07	1.72	0
SGB0073	MH16_bin241.metabat2	Bacteria	Actinobacteriota	Actinomycetia	Actinomycetales	Microbacteriaceae	Microbacterium	Unassign	413	42582	2790003	72.48	7860	64.39	0	8
SGB0074	MH16_bin242.metabat2	Bacteria	Acidobacteriota	Thermoanaerobaculia	UBA5704	UBA5704	UBA5704	Unassign	649	108243	7183037	69.37	15112	95.3	4.5	57
SGB0075	MH16_bin244.metabat2	Bacteria	Firmicutes	Bacilli	Lactobacillales	Streptococcaceae	Lactococcus_A	Unassign	65	144879	2041127	39.7	41131	97.55	1.32	0
SGB0076	MH16_bin245.metabat2	Bacteria	Proteobacteria	Gammaproteobacteria	Burkholderiales	Burkholderiaceae	Comamonas	Comamonas acidovorans	857	20737	4097871	67.33	5052	52.04	1.72	0
SGB0077	MH16_bin247.metabat2	Bacteria	Bacteroidota	Bacteroidia	Flavobacteriales	PHOS-HE28	PHOS-HE28	Unassign	245	155496	3928284	59.93	21284	97.04	0.99	3
SGB0078	MH16_bin251.metabat2	Bacteria	Proteobacteria	Gammaproteobacteria	Xanthomonadales	SZUA-5	JADKFD01	Unassign	608	23087	3031059	65.17	5424	55	0	0
SGB0079	MH16_bin252.metabat2	Bacteria	Firmicutes	Bacilli	Erysipelotrichales	Erysipelotrichaceae	Erysipelothrix	Unassign	203	65860	1938577	35.71	11880	70.69	1.72	0
SGB0080	MH16_bin253.metabat2	Bacteria	Patescibacteria	Saccharimonadia	Saccharimonadales	Unassign	Unassign	Unassign	2	336712	471441	43.56	336712	59.48	0	0
SGB0081	MH16_bin255.metabat2	Bacteria	Proteobacteria	Alphaproteobacteria	Rhizobiales	Xanthobacteraceae	Aquabacter	Unassign	763	20651	3697912	68.94	5117	68.57	1.32	3
SGB0082	MH16_bin256.metabat2	Bacteria	Proteobacteria	Gammaproteobacteria	Burkholderiales	Burkholderiaceae	Acidovorax_C	Acidovorax_C sp001725235	428	54510	4037474	68.91	12219	89.67	4.67	4
SGB0083	MH16_bin257.metabat2	Bacteria	Verrucomicrobiota	Verrucomicrobiae	Verrucomicrobiales	Akkermansiaceae	Haloferula	Unassign	769	58966	6461288	63.23	10337	82.09	2.04	0
SGB0084	MH16_bin259.metabat2	Bacteria	Proteobacteria	Alphaproteobacteria	Rhodobacterales	Rhodobacteraceae	Frigidibacter	Unassign	116	227521	3236267	62.53	51380	96.29	1.33	3
SGB0085	MH16_bin260.metabat2	Bacteria	Planctomycetota	Planctomycetia	Isosphaerales	Isosphaeraceae	RI-372	Unassign	479	77014	5924645	56.72	16104	96.71	0	0
SGB0086	MH16_bin262.metabat2	Bacteria	Actinobacteriota	Thermoleophilia	Solirubrobacterales	1970-09-01	67-14	Unassign	291	40441	2588798	61.43	10968	91.95	0.43	0
SGB0087	MH16_bin263.metabat2	Bacteria	Proteobacteria	Alphaproteobacteria	Rhizobiales	Rhizobiaceae	RCIZ01	Unassign	613	90616	3890925	62.26	6918	58.63	4.66	1
SGB0088	MH16_bin265.metabat2	Bacteria	Proteobacteria	Gammaproteobacteria	Burkholderiales	Rhodocyclaceae	UBA2357	Unassign	436	64714	4497548	64.26	13874	92.58	2.84	53
SGB0089	MH16_bin267.metabat2	Bacteria	Bacteroidota	Bacteroidia	Flavobacteriales	Flavobacteriaceae	Flavobacterium	Unassign	487	57605	5770610	33.46	17788	73.79	5.17	5
SGB0090	MH16_bin270.metabat2	Bacteria	Actinobacteriota	Thermoleophilia	Gaiellales	SKUG01	Unassign	Unassign	374	28617	2571482	66.49	7906	70.66	3.02	17
SGB0091	MH16_bin28.metabat2	Bacteria	Planctomycetota	Planctomycetia	Pirellulales	Pirellulaceae	Anatilimnocola	Unassign	333	142132	7380900	58.24	32814	97.63	1.34	1
SGB0092	MH16_bin29.metabat2	Bacteria	Bacteroidota	Bacteroidia	Chitinophagales	Chitinophagaceae	46-32	Unassign	460	42718	4472513	44.95	12141	88.49	1.73	1
SGB0093	MH16_bin3.metabat2	Bacteria	Desulfobacterota_I	Desulfovibrionia	Desulfovibrionales	Desulfovibrionaceae	Desulfovibrio	Unassign	177	142872	2994998	55.34	23554	95.86	0.89	0
SGB0094	MH16_bin32.metabat2	Bacteria	Verrucomicrobiota	Verrucomicrobiae	Verrucomicrobiales	Akkermansiaceae	Luteolibacter	Unassign	498	36797	3995435	59.18	9658	82.31	2.38	1
SGB0095	MH16_bin33.metabat2	Bacteria	Actinobacteriota	Actinomycetia	Actinomycetales	Microbacteriaceae	73-13	Unassign	336	63285	2871732	71.66	10785	80.54	7.93	4
SGB0096	MH16_bin34.metabat2	Bacteria	Patescibacteria	Saccharimonadia	Saccharimonadales	UBA1020	Unassign	Unassign	25	143130	818186	49.26	44004	62.19	1.85	0
SGB0097	MH16_bin37.metabat2	Bacteria	Bacteroidota	Bacteroidia	AKYH767	B-17BO	UBA2475	Unassign	201	154115	4427119	39.43	31044	96.49	1.11	4
SGB0098	MH16_bin41.metabat2	Bacteria	Patescibacteria	Saccharimonadia	Saccharimonadales	UBA1547	UBA6175	Unassign	18	151495	775037	47	114283	59.68	0.93	0
SGB0099	MH16_bin48.metabat2	Bacteria	Bdellovibrionota	Oligoflexia	Oligoflexales	RGVZ01	Unassign	Unassign	726	25804	4326736	61.55	6923	67.79	2.68	3
SGB0100	MH16_bin50.metabat2	Bacteria	Proteobacteria	Gammaproteobacteria	Pseudomonadales	Moraxellaceae	Acinetobacter	Unassign	45	147322	1722872	41.45	50688	53.83	0	4
SGB0101	MH16_bin57.metabat2	Bacteria	Patescibacteria	Saccharimonadia	Saccharimonadales	UBA1547	2011-GWC2-44-17	Unassign	15	260226	1079473	45.79	183180	65.1	0	0
SGB0102	MH16_bin59.metabat2	Bacteria	Proteobacteria	Alphaproteobacteria	Rhizobiales	Rhizobiaceae	Rhizobium_B	Unassign	60	323204	3113172	58.17	92965	68.97	0	0
SGB0103	MH16_bin6.metabat2	Bacteria	Verrucomicrobiota	Verrucomicrobiae	Verrucomicrobiales	Verrucomicrobiaceae	JAEUHN01	Unassign	549	52915	5576752	59.73	13459	88.38	0.68	0
SGB0104	MH16_bin65.metabat2	Bacteria	Acidobacteriota	Blastocatellia	Pyrinomonadales	Pyrinomonadaceae	OLB17	Unassign	176	100645	3884861	51.32	33866	92.4	2.56	0
SGB0105	MH16_bin7.metabat2	Bacteria	Campylobacterota	Campylobacteria	Campylobacterales	Arcobacteraceae	Aliarcobacter	Aliarcobacter butzleri	175	20831	1024058	27.83	6509	58.14	0.2	0
SGB0106	MH16_bin71.metabat2	Bacteria	Verrucomicrobiota	Verrucomicrobiae	Chthoniobacterales	Terrimicrobiaceae	Unassign	Unassign	168	112085	3877563	58.4	37348	88.58	3.38	2
SGB0107	MH16_bin72.metabat2	Bacteria	Proteobacteria	Alphaproteobacteria	Rhizobiales	Rhizobiaceae	Agrobacterium	Unassign	174	210118	4380903	58.8	39762	73.62	0	30
SGB0108	MH16_bin74.metabat2	Bacteria	Actinobacteriota	Acidimicrobiia	Acidimicrobiales	Microtrichaceae	Unassign	Unassign	153	165762	4228376	64.45	40081	96.87	1.28	1
SGB0109	MH16_bin77.metabat2	Bacteria	Proteobacteria	Alphaproteobacteria	UBA1280	UBA6156	UBA6156	Unassign	107	23889	775989	57.27	8324	57.94	0	0
SGB0110	MH16_bin78.metabat2	Bacteria	Bdellovibrionota_C	UBA2361	UBA2361	Unassign	Unassign	Unassign	406	46958	3323675	47.9	9430	72.87	2.1	0
SGB0111	MH16_bin79.metabat2	Bacteria	Bacteroidota	Bacteroidia	Cytophagales	Spirosomaceae	Spirosoma	Unassign	549	75182	7590475	46.67	18850	91.96	0.61	1
SGB0112	MH16_bin81.metabat2	Bacteria	Proteobacteria	Alphaproteobacteria	Rhizobiales	Xanthobacteraceae	Xanthobacter	Unassign	198	200450	3943962	61.06	28285	95.06	1.42	7
SGB0113	MH16_bin84.metabat2	Bacteria	Planctomycetota	Planctomycetia	Gemmatales	Gemmataceae	Zavarzinella	Unassign	521	61216	5774447	55.03	14632	83.52	2.27	0
SGB0114	MH16_bin87.metabat2	Bacteria	Proteobacteria	Alphaproteobacteria	Rhodobacterales	Rhodobacteraceae	JAATGA01	Unassign	243	123772	4697434	63.82	31162	96.12	1.84	3
SGB0115	MH16_bin91.metabat2	Bacteria	Myxococcota	Polyangia	Nannocystales	Nannocystaceae	Nannocystis	Unassign	1120	60842	9708454	71.28	11459	90.02	3.45	18
SGB0116	MH16_bin92.metabat2	Bacteria	Firmicutes_A	Clostridia	Clostridiales	Clostridiaceae	Clostridium	Unassign	908	70146	6776162	29.73	9183	88.9	4.65	51
SGB0117	MH16_bin99.metabat2	Bacteria	Proteobacteria	Gammaproteobacteria	Pseudomonadales	Cellvibrionaceae	Cellvibrio	Unassign	290	61344	3283137	50.35	14776	62.07	0	10
SGB0118	MH16_bins119.concoct	Bacteria	Patescibacteria	Saccharimonadia	Saccharimonadales	AWTP1-31	Unassign	Unassign	194	16834	900704	43.58	5234	55.98	1.85	0
SGB0119	MH16_bins120.concoct	Bacteria	Bacteroidota	Bacteroidia	Chitinophagales	Chitinophagaceae	Edaphocola	Unassign	295	19924	2755602	36.94	12126	77.62	2.22	2
SGB0120	MH16_bins127.concoct	Bacteria	Proteobacteria	Alphaproteobacteria	Micavibrionales	Micavibrionaceae	Micavibrio_A	Unassign	370	17147	1750802	51.51	5337	79.02	1.88	0
SGB0121	MH16_bins14.concoct	Bacteria	Proteobacteria	Alphaproteobacteria	Rhizobiales	Devosiaceae	Devosia	Unassign	718	19957	2944627	62.23	4223	50.46	3.39	0
SGB0122	MH16_bins15.concoct	Bacteria	Actinobacteriota	Thermoleophilia	Solirubrobacterales	1970-09-01	67-14	Unassign	561	18935	2220730	67.13	4161	54.48	2.07	0
SGB0123	MH16_bins167.concoct	Bacteria	Planctomycetota	Planctomycetia	Gemmatales	HRBIN36	JAEUIE01	Unassign	1036	16329	4149046	53.69	4343	61.65	1.16	0
SGB0124	MH16_bins184.concoct	Bacteria	Bacteroidota	Bacteroidia	Chitinophagales	Chitinophagaceae	46-32	Unassign	1188	18125	5000063	45.49	4598	69.86	2.56	0
SGB0125	MH16_bins40.concoct	Bacteria	Proteobacteria	Gammaproteobacteria	Burkholderiales	Burkholderiaceae	Inhella	Unassign	391	19594	3235530	68.12	10629	68.97	1.72	0
SGB0126	MH16_bins68.concoct	Bacteria	Proteobacteria	Alphaproteobacteria	Caulobacterales	Caulobacteraceae	Asticcacaulis	Unassign	584	17090	2257102	55.22	4132	66.11	2.46	0
SGB0127	MH16_bins80.concoct	Bacteria	Firmicutes_C	Negativicutes	Sporomusales	Sporomusaceae	Sporomusa	Sporomusa sp007830295	1096	19859	4485369	44.35	4425	78	8.02	0
SGB0128	MH20.bins013.maxbin	Bacteria	Proteobacteria	Gammaproteobacteria	Pseudomonadales	Moraxellaceae	Acinetobacter	Acinetobacter sp002135205	476	49690	2540465	41.39	6545	65.82	1.09	0
SGB0129	MH20.bins022.maxbin	Bacteria	Proteobacteria	Alphaproteobacteria	Rhizobiales	Devosiaceae	Devosia_A	Unassign	118	156743	3166544	64.98	59070	67.7	3.06	1
SGB0130	MH20.bins036.maxbin	Bacteria	Actinobacteriota	Actinomycetia	Actinomycetales	Microbacteriaceae	Microbacterium	Unassign	302	75247	3327415	70.96	16435	78.71	5.26	10
SGB0131	MH20.bins038.maxbin	Bacteria	Bacteroidota	Bacteroidia	Flavobacteriales	UA16	UBA4660	Unassign	93	577730	4086935	40.86	177594	100	4.11	1
SGB0132	MH20.bins040.maxbin	Bacteria	Proteobacteria	Alphaproteobacteria	Rhizobiales	Xanthobacteraceae	Xanthobacter	Unassign	189	167605	4470113	67.9	45828	96.51	5.62	15
SGB0133	MH20.bins077.maxbin	Bacteria	Bacteroidota	Bacteroidia	Chitinophagales	Chitinophagaceae	Agriterribacter	Unassign	575	71820	4639938	40.2	11477	80.93	2.79	5
SGB0134	MH20.bins088.maxbin	Bacteria	Proteobacteria	Alphaproteobacteria	Rhizobiales	Rhizobiaceae	Agrobacterium	Unassign	689	37951	3585796	52.88	6193	64.01	4.33	0
SGB0135	MH20.bins102.maxbin	Bacteria	Proteobacteria	Gammaproteobacteria	Pseudomonadales	Moraxellaceae	Acinetobacter	Unassign	444	29174	2447939	42.2	6914	57.86	4.92	0
SGB0136	MH20.bins104.maxbin	Bacteria	Proteobacteria	Alphaproteobacteria	Sphingomonadales	Sphingomonadaceae	Sandaracinobacter	Unassign	191	113272	3187617	64.82	36910	81.72	5.48	10
SGB0137	MH20.bins109.maxbin	Bacteria	Verrucomicrobiota	Verrucomicrobiae	Opitutales	Opitutaceae	ER46	Unassign	143	142914	3839045	65.89	40948	76.03	0.68	0
SGB0138	MH20.bins127.maxbin	Bacteria	Armatimonadota	Fimbriimonadia	Fimbriimonadales	Fimbriimonadaceae	Fimbriimonas	Unassign	44	387541	3120310	50.57	143285	94.91	4.63	0
SGB0139	MH20.bins131.maxbin	Bacteria	Actinobacteriota	Acidimicrobiia	Acidimicrobiales	Microtrichaceae	SKRR01	Unassign	175	114849	3642548	67.53	30500	94.3	5.78	0
SGB0140	MH20.bins176.maxbin	Bacteria	Bacteroidota	Bacteroidia	Chitinophagales	Saprospiraceae	M3007	Unassign	319	124348	5147600	48.11	24684	90.35	3.09	1
SGB0141	MH20.bins248.maxbin	Bacteria	Patescibacteria	Saccharimonadia	Saccharimonadales	UBA1547	UBA6175	Unassign	112	40036	788562	47.7	9905	56.9	3.63	0
SGB0142	MH20.bins289.maxbin	Bacteria	Myxococcota	Polyangia	Polyangiales	Polyangiaceae	NIC37A-2	Unassign	897	10204	2889901	61.77	3281	55.75	0.81	0
SGB0143	MH20_bin101.metabat2	Bacteria	Proteobacteria	Gammaproteobacteria	Burkholderiales	Methylophilaceae	Methylophilus	Unassign	224	52106	2650561	48.21	15593	93.24	0.43	3
SGB0144	MH20_bin104.metabat2	Bacteria	Proteobacteria	Alphaproteobacteria	Rhizobiales	Beijerinckiaceae	Camelimonas	Unassign	508	25634	2976713	66.17	6869	69.16	1	0
SGB0145	MH20_bin11.metabat2	Bacteria	Actinobacteriota	Thermoleophilia	Solirubrobacterales	1970-09-01	67-14	Unassign	81	246152	3129654	62.5	62570	95.55	1.72	1
SGB0146	MH20_bin110.metabat2	Bacteria	Proteobacteria	Gammaproteobacteria	Burkholderiales	Burkholderiaceae	Acidovorax_C	Acidovorax_C sp001725235	387	60781	3918220	69.19	13438	83.99	4.43	3
SGB0147	MH20_bin111.metabat2	Bacteria	Proteobacteria	Gammaproteobacteria	Xanthomonadales	Xanthomonadaceae	Unassign	Unassign	531	25312	2819253	69.35	5947	55.49	0	0
SGB0148	MH20_bin112.metabat2	Bacteria	Proteobacteria	Gammaproteobacteria	Burkholderiales	Rhodocyclaceae	Ga0074130	Unassign	171	80517	2774427	62.02	25775	82.92	8.62	12
SGB0149	MH20_bin116.metabat2	Bacteria	Proteobacteria	Gammaproteobacteria	Pseudomonadales	Cellvibrionaceae	Cellvibrio	Unassign	133	101902	3292927	53.31	32930	95.14	0.86	9
SGB0150	MH20_bin118.metabat2	Bacteria	Proteobacteria	Alphaproteobacteria	Rhizobiales	Rhizobiaceae	Agrobacterium	Unassign	515	46795	4388372	59.25	10354	75.86	0	15
SGB0151	MH20_bin120.metabat2	Bacteria	Bacteroidota	Bacteroidia	Flavobacteriales	Weeksellaceae	Unassign	Unassign	138	136975	3056862	31.7	35027	98.03	1.08	3
SGB0152	MH20_bin121.metabat2	Bacteria	Proteobacteria	Alphaproteobacteria	Rhizobiales	Rhizobiaceae	Agrobacterium	Agrobacterium sp014851585	613	55157	4368769	55.37	8222	57.24	0	0
SGB0153	MH20_bin128.metabat2	Bacteria	Proteobacteria	Alphaproteobacteria	Rhizobiales	Devosiaceae	Devosia_A	Unassign	123	215070	3517811	64.52	45524	85.35	4.27	0
SGB0154	MH20_bin13.metabat2	Bacteria	Bdellovibrionota	Bdellovibrionia	Bdellovibrionales	Bdellovibrionaceae	Bdellovibrio	Unassign	56	284785	3794066	48.55	115034	95.96	0.3	20
SGB0155	MH20_bin132.metabat2	Bacteria	Actinobacteriota	Actinomycetia	Actinomycetales	Demequinaceae	Demequina	Unassign	242	63995	2823881	70.59	15969	93.82	0.72	0
SGB0156	MH20_bin137.metabat2	Bacteria	Bacteroidota	Bacteroidia	Chitinophagales	Chitinophagaceae	46-32	Unassign	324	73268	4782841	45.04	20165	96.71	0	1
SGB0157	MH20_bin138.metabat2	Bacteria	Bacteroidota	Bacteroidia	Flavobacteriales	Crocinitomicaceae	40-80	Unassign	78	141275	3003940	37.88	57084	98.92	0	4
SGB0158	MH20_bin139.metabat2	Bacteria	Proteobacteria	Gammaproteobacteria	Burkholderiales	Burkholderiaceae	JAGOEY01	Unassign	208	106995	4090512	65.3	29114	91.31	3.96	3
SGB0159	MH20_bin141.metabat2	Bacteria	Proteobacteria	Alphaproteobacteria	Rhizobiales	Xanthobacteraceae	Xanthobacter	Unassign	63	220906	3601808	61.19	100055	84.81	1.27	7
SGB0160	MH20_bin142.metabat2	Bacteria	Proteobacteria	Alphaproteobacteria	Caulobacterales	TH1-2	Terricaulis	Unassign	359	62528	3311038	62.91	11489	84.54	4.39	0
SGB0161	MH20_bin143.metabat2	Bacteria	Proteobacteria	Gammaproteobacteria	Burkholderiales	Rhodocyclaceae	Methyloversatilis	Unassign	132	94962	3322742	63.93	38157	96.06	1.08	25
SGB0162	MH20_bin145.metabat2	Bacteria	Bdellovibrionota	Bacteriovoracia	Bacteriovoracales	Bacteriovoracaceae	Unassign	Unassign	471	21089	2547073	39.92	5894	56.14	0.88	0
SGB0163	MH20_bin15.metabat2	Bacteria	Verrucomicrobiota	Verrucomicrobiae	Verrucomicrobiales	Akkermansiaceae	Luteolibacter	Unassign	278	137619	5015825	63	27954	94.35	1.36	3
SGB0164	MH20_bin150.metabat2	Bacteria	Chlamydiota	Chlamydiia	Chlamydiales	Parachlamydiaceae	JACDHD01	Unassign	187	38869	1827009	33.22	13720	93.69	1.01	0
SGB0165	MH20_bin155.metabat2	Bacteria	Planctomycetota	Planctomycetia	Pirellulales	Pirellulaceae	Unassign	Unassign	534	94625	6597012	58.91	17471	97.13	0	1
SGB0166	MH20_bin162.metabat2	Bacteria	Proteobacteria	Gammaproteobacteria	Xanthomonadales	UBA2363	Pseudofulvimonas	Unassign	294	47205	2734243	59.99	11985	88.65	1.48	0
SGB0167	MH20_bin164.metabat2	Bacteria	Firmicutes	Bacilli	Erysipelotrichales	Erysipelotrichaceae	Erysipelothrix	Unassign	258	33118	1822275	35.4	8595	81.54	0.31	0
SGB0168	MH20_bin165.metabat2	Bacteria	Bacteroidota	Bacteroidia	Chitinophagales	Saprospiraceae	OLB8	Unassign	208	106385	4806413	36.98	31614	94.55	1.49	5
SGB0169	MH20_bin166.metabat2	Bacteria	Acidobacteriota	Blastocatellia	Pyrinomonadales	Pyrinomonadaceae	OLB17	Unassign	633	25328	3137091	54.79	5322	58.58	4.33	0
SGB0170	MH20_bin17.metabat2	Bacteria	Campylobacterota	Campylobacteria	Campylobacterales	Arcobacteraceae	Aliarcobacter	Aliarcobacter butzleri	310	26911	1691929	27.55	5750	86.18	1.02	0
SGB0171	MH20_bin170.metabat2	Bacteria	Verrucomicrobiota	Verrucomicrobiae	Verrucomicrobiales	Akkermansiaceae	Luteolibacter	Unassign	163	144768	5582954	61.05	59811	96.54	1.59	0
SGB0172	MH20_bin171.metabat2	Bacteria	Verrucomicrobiota	Verrucomicrobiae	Verrucomicrobiales	Akkermansiaceae	Luteolibacter	Unassign	401	61642	5656787	61.16	18900	91.91	2.72	0
SGB0173	MH20_bin175.metabat2	Bacteria	Actinobacteriota	Acidimicrobiia	Acidimicrobiales	JAAYBP01	JAAYBP01	Unassign	256	101895	4823037	69.86	27841	96.77	2.74	0
SGB0174	MH20_bin179.metabat2	Bacteria	Actinobacteriota	Actinomycetia	Actinomycetales	Microbacteriaceae	Microbacterium	Unassign	291	125584	3404102	69.45	15484	92.1	8.34	10
SGB0175	MH20_bin18.metabat2	Bacteria	Actinobacteriota	Actinomycetia	Actinomycetales	Demequinaceae	Unassign	Unassign	25	268377	2182763	52.36	125550	98.75	0	0
SGB0176	MH20_bin181.metabat2	Bacteria	Patescibacteria	Saccharimonadia	Saccharimonadales	JACDBH01	JACDBH01	Unassign	20	135882	921103	47.18	73497	63.89	0.93	0
SGB0177	MH20_bin182.metabat2	Bacteria	Proteobacteria	Alphaproteobacteria	Rhodobacterales	Rhodobacteraceae	Amaricoccus	Unassign	326	79625	3360872	68.5	13789	89.6	3.19	3
SGB0178	MH20_bin185.metabat2	Bacteria	Proteobacteria	Gammaproteobacteria	Pseudomonadales	Pseudomonadaceae	Pseudomonas_Q	Unassign	158	126109	4056580	62.93	39662	96.6	5.33	14
SGB0179	MH20_bin190.metabat2	Bacteria	Chloroflexota	Chloroflexia	Thermomicrobiales	Unassign	Unassign	Unassign	280	44521	3473594	59.39	16650	92.24	0.31	0
SGB0180	MH20_bin192.metabat2	Bacteria	Proteobacteria	Alphaproteobacteria	Rhodobacterales	Rhodobacteraceae	Paracoccus	Unassign	157	167570	3725717	62.21	35837	95.87	2.98	0
SGB0181	MH20_bin194.metabat2	Bacteria	Proteobacteria	Gammaproteobacteria	Burkholderiales	Aquaspirillaceae	Microvirgula	Unassign	241	67052	3010474	64.48	15611	77.59	6.9	3
SGB0182	MH20_bin198.metabat2	Bacteria	Proteobacteria	Gammaproteobacteria	Steroidobacterales	Steroidobacteraceae	ZC4RG30	Unassign	260	67991	3579228	66.86	19799	90.64	5.45	50
SGB0183	MH20_bin2.metabat2	Bacteria	Bdellovibrionota	Bdellovibrionia_A	UBA1018	UBA1018	Unassign	Unassign	63	285308	4188482	60.29	106781	92.63	2.68	0
SGB0184	MH20_bin200.metabat2	Bacteria	Patescibacteria	Saccharimonadia	Saccharimonadales	JACDFO01	Unassign	Unassign	71	31612	607146	48.66	9583	68.82	1.12	0
SGB0185	MH20_bin201.metabat2	Bacteria	Verrucomicrobiota	Verrucomicrobiae	Verrucomicrobiales	Verrucomicrobiaceae	Roseimicrobium	Unassign	160	276121	7912171	61.8	81502	93.2	2.18	39
SGB0186	MH20_bin202.metabat2	Bacteria	Firmicutes	Bacilli	Erysipelotrichales	Erysipelotrichaceae	Erysipelothrix	Erysipelothrix sp009828765	269	21213	1609437	38.64	6374	79.2	5.97	0
SGB0187	MH20_bin203.metabat2	Bacteria	Actinobacteriota	Actinomycetia	Actinomycetales	Microbacteriaceae	Microbacterium	Unassign	309	84108	4385511	68.89	21031	72.09	7.02	50
SGB0188	MH20_bin205.metabat2	Bacteria	Proteobacteria	Gammaproteobacteria	Burkholderiales	Methylophilaceae	Methylobacillus	Unassign	138	152149	2918619	54.82	30002	67.24	1.72	0
SGB0189	MH20_bin207.metabat2	Bacteria	Bacteroidota	Bacteroidia	Chitinophagales	Chitinophagaceae	Niabella	Unassign	30	303810	3030539	37.92	161844	84.52	0.63	2
SGB0190	MH20_bin208.metabat2	Bacteria	Proteobacteria	Gammaproteobacteria	Burkholderiales	Burkholderiaceae	Hydrogenophaga	Unassign	317	186075	4752633	67.82	23596	87.59	6.06	30
SGB0191	MH20_bin210.metabat2	Bacteria	Proteobacteria	Gammaproteobacteria	Burkholderiales	Burkholderiaceae	Pelomonas	Unassign	302	83854	4094305	69.15	18056	58.62	4.31	0
SGB0192	MH20_bin212.metabat2	Bacteria	Actinobacteriota	Actinomycetia	Propionibacteriales	Propionibacteriaceae	Propionicimonas	Unassign	185	91888	3263621	68.19	25382	94.97	3.08	6
SGB0193	MH20_bin215.metabat2	Bacteria	Proteobacteria	Alphaproteobacteria	Rhodobacterales	Rhodobacteraceae	UBA996	Unassign	398	60321	4214988	68.56	13911	88.99	3.08	16
SGB0194	MH20_bin216.metabat2	Bacteria	Bacteroidota	Bacteroidia	Flavobacteriales	Flavobacteriaceae	Flavobacterium	Unassign	117	130530	3592784	35.73	47740	97.85	0.74	4
SGB0195	MH20_bin217.metabat2	Bacteria	Bacteroidota	Bacteroidia	Chitinophagales	Chitinophagaceae	JJ008	Unassign	20	733737	3969094	42.85	395882	99.51	0	1
SGB0196	MH20_bin218.metabat2	Bacteria	Bacteroidota	Bacteroidia	Sphingobacteriales	Sphingobacteriaceae	Unassign	Unassign	369	42297	2522363	44.86	7637	74.19	0.71	2
SGB0197	MH20_bin22.metabat2	Bacteria	Proteobacteria	Alphaproteobacteria	Rhizobiales	Beijerinckiaceae	Microvirga	Unassign	201	126373	4330231	63.81	33937	91.84	2.24	0
SGB0198	MH20_bin220.metabat2	Bacteria	Cyanobacteria	Sericytochromatia	UBA7694	UBA7694	UBA7694	Unassign	288	117150	5095152	52.84	24681	89.74	2.99	0
SGB0199	MH20_bin222.metabat2	Bacteria	Bacteroidota	Bacteroidia	Chitinophagales	Chitinophagaceae	Edaphocola	Unassign	132	221122	3956401	37.97	40824	97.04	1.48	5
SGB0200	MH20_bin225.metabat2	Bacteria	Verrucomicrobiota	Verrucomicrobiae	Verrucomicrobiales	Akkermansiaceae	Luteolibacter	Unassign	212	113618	5292575	63.67	41140	96.41	8.39	1
SGB0201	MH20_bin229.metabat2	Bacteria	Firmicutes	Bacilli	Lactobacillales	Vagococcaceae	Vagococcus	Vagococcus fluvialis	177	60830	2786500	32.34	21887	93.77	4.14	0
SGB0202	MH20_bin231.metabat2	Bacteria	Verrucomicrobiota	Verrucomicrobiae	Verrucomicrobiales	Verrucomicrobiaceae	Phragmitibacter	Unassign	686	27243	4376710	57.58	7181	76.29	4.08	0
SGB0203	MH20_bin232.metabat2	Bacteria	Bacteroidota	Bacteroidia	Flavobacteriales	Flavobacteriaceae	Flavobacterium	Flavobacterium sp001898245	147	91572	3384600	40.15	34110	94.83	0.35	9
SGB0204	MH20_bin233.metabat2	Bacteria	Actinobacteriota	Acidimicrobiia	Acidimicrobiales	UBA8139	JACPNV01	Unassign	526	51789	4673554	70.2	11253	84.48	9.2	0
SGB0205	MH20_bin244.metabat2	Bacteria	Proteobacteria	Gammaproteobacteria	Xanthomonadales	Xanthomonadaceae	Luteimonas	Unassign	316	82391	4365722	67.06	22513	82.07	2.59	27
SGB0206	MH20_bin250.metabat2	Bacteria	Actinobacteriota	Actinomycetia	Actinomycetales	Microbacteriaceae	73-13	Unassign	310	47353	2833783	69.83	12069	84.34	5.43	0
SGB0207	MH20_bin252.metabat2	Bacteria	Bacteroidota	Bacteroidia	Flavobacteriales	Flavobacteriaceae	Flavobacterium	Unassign	380	20078	1645257	37.98	4520	51.72	3.45	0
SGB0208	MH20_bin255.metabat2	Bacteria	Proteobacteria	Alphaproteobacteria	Caulobacterales	Caulobacteraceae	Brevundimonas	Unassign	359	48251	3055710	67.66	10796	83.06	2.85	24
SGB0209	MH20_bin256.metabat2	Bacteria	Proteobacteria	Gammaproteobacteria	Pseudomonadales	Pseudomonadaceae	Unassign	Unassign	351	61703	3444439	62.43	12502	60.34	1.72	3
SGB0210	MH20_bin257.metabat2	Bacteria	Bacteroidota	Bacteroidia	Bacteroidales	Dysgonomonadaceae	Dysgonomonas	Dysgonomonas capnocytophagoides	68	223578	2577452	36.93	82682	56.9	0	0
SGB0211	MH20_bin266.metabat2	Bacteria	Verrucomicrobiota	Verrucomicrobiae	Verrucomicrobiales	Akkermansiaceae	Luteolibacter	Unassign	359	21420	2000351	66.54	6368	52.41	1.72	0
SGB0212	MH20_bin268.metabat2	Bacteria	Proteobacteria	Alphaproteobacteria	Sphingomonadales	Sphingomonadaceae	Sandaracinobacter	Unassign	125	197671	3599860	65.09	49448	96.81	1.91	25
SGB0213	MH20_bin269.metabat2	Bacteria	Planctomycetota	Phycisphaerae	Phycisphaerales	Phycisphaeraceae	Unassign	Unassign	159	128990	3745603	58.39	33658	94.09	1.14	1
SGB0214	MH20_bin270.metabat2	Bacteria	Bacteroidota	Bacteroidia	Flavobacteriales	Flavobacteriaceae	Flavobacterium	Unassign	385	89709	5688638	33.63	22502	91.43	2.03	3
SGB0215	MH20_bin272.metabat2	Bacteria	Bacteroidota	Bacteroidia	Sphingobacteriales	Sphingobacteriaceae	Sphingobacterium	Unassign	178	161037	6115118	40.2	58183	97.59	2.86	5
SGB0216	MH20_bin274.metabat2	Bacteria	Campylobacterota	Campylobacteria	Campylobacterales	Arcobacteraceae	Aliarcobacter	Unassign	246	18951	1116347	28.83	4695	70.04	0	0
SGB0217	MH20_bin278.metabat2	Bacteria	Planctomycetota	Planctomycetia	Pirellulales	Pirellulaceae	Anatilimnocola	Unassign	857	33523	4970085	60	6450	64.8	2.02	0
SGB0218	MH20_bin279.metabat2	Bacteria	Cyanobacteria	Sericytochromatia	UBA7694	UBA7694	Unassign	Unassign	156	164117	5492987	48.92	51133	91.45	4.7	0
SGB0219	MH20_bin282.metabat2	Bacteria	Proteobacteria	Alphaproteobacteria	Caulobacterales	Caulobacteraceae	Asticcacaulis	Unassign	41	468743	3300767	56.03	112315	98.76	0	0
SGB0220	MH20_bin283.metabat2	Bacteria	Patescibacteria	Saccharimonadia	Saccharimonadales	JACDBH01	Unassign	Unassign	29	97178	941583	40.52	57612	66.67	2.14	0
SGB0221	MH20_bin285.metabat2	Bacteria	Actinobacteriota	Actinomycetia	Propionibacteriales	Nocardioidaceae	Aeromicrobium	Unassign	293	53502	3408087	67.89	16559	93.07	2.59	12
SGB0222	MH20_bin287.metabat2	Bacteria	Bacteroidota	Bacteroidia	Bacteroidales	Dysgonomonadaceae	Dysgonomonas	Unassign	160	144754	3704805	36.53	40747	94.9	1.09	0
SGB0223	MH20_bin288.metabat2	Bacteria	Proteobacteria	Alphaproteobacteria	Caulobacterales	Caulobacteraceae	Brevundimonas	Unassign	128	105112	3206570	67.41	39781	97.23	4.65	0
SGB0224	MH20_bin30.metabat2	Bacteria	Proteobacteria	Alphaproteobacteria	Sphingomonadales	Sphingomonadaceae	Sphingobium	Sphingobium sp009360885	58	223845	3025578	55.69	71678	96.11	1.19	23
SGB0225	MH20_bin31.metabat2	Bacteria	Proteobacteria	Gammaproteobacteria	Pseudomonadales	Pseudomonadaceae	Pseudomonas_E	Pseudomonas_E sp014851865	168	145254	4797420	63.4	42249	68.28	3.45	67
SGB0226	MH20_bin32.metabat2	Bacteria	Proteobacteria	Gammaproteobacteria	Xanthomonadales	Xanthomonadaceae	Pseudoxanthomonas_A	Unassign	55	215972	2955197	62.76	74205	89.09	3.59	0
SGB0227	MH20_bin34.metabat2	Bacteria	Actinobacteriota	Thermoleophilia	Solirubrobacterales	Solirubrobacteraceae	Conexibacter	Unassign	680	14359	2865417	72.29	4277	66.92	0.85	0
SGB0228	MH20_bin35.metabat2	Bacteria	Proteobacteria	Gammaproteobacteria	Burkholderiales	Burkholderiaceae	Unassign	Unassign	787	31394	5393694	64.01	8073	86.05	2.21	0
SGB0229	MH20_bin40.metabat2	Bacteria	Bacteroidota	Bacteroidia	Cytophagales	Spirosomaceae	Leadbetterella	Unassign	149	156993	4515045	37.47	55414	92.08	0.89	6
SGB0230	MH20_bin41.metabat2	Bacteria	Actinobacteriota	Actinomycetia	Actinomycetales	Cellulomonadaceae	Flavimobilis	Unassign	445	21135	2248720	73.13	5449	66.1	2.52	8
SGB0231	MH20_bin43.metabat2	Bacteria	Firmicutes_C	Negativicutes	Selenomonadales	Massilibacillaceae	Massilibacillus	Unassign	440	115390	4178803	36.79	13428	77.53	9.89	0
SGB0232	MH20_bin48.metabat2	Bacteria	Proteobacteria	Alphaproteobacteria	Rhizobiales	Devosiaceae	Devosia_A	Unassign	272	157599	3503055	64.17	17182	76.18	1.95	1
SGB0233	MH20_bin51.metabat2	Bacteria	Verrucomicrobiota	Verrucomicrobiae	Chthoniobacterales	Unassign	Unassign	Unassign	222	89836	4458958	49.47	30230	97	2.36	0
SGB0234	MH20_bin53.metabat2	Bacteria	Planctomycetota	Phycisphaerae	Tepidisphaerales	Tepidisphaeraceae	JACMML01	Unassign	840	18374	4037158	61.02	4961	55.72	2.27	0
SGB0235	MH20_bin55.metabat2	Bacteria	Actinobacteriota	Actinomycetia	Mycobacteriales	Mycobacteriaceae	Mycobacterium	Unassign	895	16910	4322316	67.93	5153	63.55	0.84	0
SGB0236	MH20_bin57.metabat2	Bacteria	Myxococcota	Polyangia	Polyangiales	Polyangiaceae	Polyangium	Unassign	1660	21350	7749713	67.98	4810	63.37	2.1	6
SGB0237	MH20_bin59.metabat2	Bacteria	Myxococcota	Myxococcia	Myxococcales	Myxococcaceae	Unassign	Unassign	737	72339	10745610	68.58	21947	93.56	6.01	43
SGB0238	MH20_bin64.metabat2	Bacteria	Patescibacteria	Saccharimonadia	Saccharimonadales	UBA7683	UBA7683	Unassign	11	253081	800518	46.31	93748	69.97	3.69	0
SGB0239	MH20_bin66.metabat2	Bacteria	Proteobacteria	Gammaproteobacteria	Enterobacterales	Enterobacteriaceae	Symbiopectobacterium	Unassign	248	126188	4473367	53.61	23835	67.35	0	4
SGB0240	MH20_bin67.metabat2	Bacteria	Proteobacteria	Gammaproteobacteria	Xanthomonadales	Xanthomonadaceae	CAU-1598	Unassign	77	187431	3589884	62.85	77227	97.68	3.4	3
SGB0241	MH20_bin69.metabat2	Bacteria	Proteobacteria	Alphaproteobacteria	Rhodobacterales	Rhodobacteraceae	Gemmobacter	Unassign	98	195332	3888301	63.72	61000	96.01	3.31	0
SGB0242	MH20_bin70.metabat2	Bacteria	Proteobacteria	Alphaproteobacteria	Rhizobiales	Rhizobiaceae	Rhizobium_B	Unassign	248	180691	4831722	59.98	34719	85.73	2.72	0
SGB0243	MH20_bin71.metabat2	Bacteria	Bacteroidota	Bacteroidia	Cytophagales	Spirosomaceae	Leadbetterella	Unassign	630	43924	4552763	44.99	8468	76.11	0.8	1
SGB0244	MH20_bin74.metabat2	Bacteria	Proteobacteria	Gammaproteobacteria	Burkholderiales	Casimicrobiaceae	Unassign	Unassign	122	251990	3740485	55.27	50409	95.37	0	4
SGB0245	MH20_bin76.metabat2	Bacteria	Proteobacteria	Alphaproteobacteria	Rhizobiales	Rhizobiaceae	Allorhizobium	Unassign	164	288155	5991047	60.67	64410	82.76	4.31	0
SGB0246	MH20_bin80.metabat2	Bacteria	Actinobacteriota	Actinomycetia	Actinomycetales	Microbacteriaceae	Leucobacter	Unassign	180	118258	2851452	63.34	22129	89.82	1.17	0
SGB0247	MH20_bin84.metabat2	Bacteria	Proteobacteria	Gammaproteobacteria	Enterobacterales	Enterobacteriaceae	Pectobacterium	Pectobacterium aroidearum	77	257444	4419363	51.97	82056	89.09	0.87	23
SGB0248	MH20_bin85.metabat2	Bacteria	Actinobacteriota	Actinomycetia	Actinomycetales	Microbacteriaceae	Microbacterium	Unassign	394	21673	2111695	65.63	5890	60.99	0.96	0
SGB0249	MH20_bin86.metabat2	Bacteria	Planctomycetota	Planctomycetia	Pirellulales	Lacipirellulaceae	Bythopirellula	Unassign	168	153032	5770386	55.17	54412	94.76	1.15	0
SGB0250	MH20_bin88.metabat2	Bacteria	Acidobacteriota	Acidobacteriae	Bryobacterales	Bryobacteraceae	Bryobacter	Unassign	262	132463	6439773	58.37	36756	93.39	1.74	1
SGB0251	MH20_bin90.metabat2	Bacteria	Proteobacteria	Gammaproteobacteria	Pseudomonadales	Moraxellaceae	Acinetobacter	Acinetobacter rudis	152	134787	2297923	39.7	30331	60.53	1.37	9
SGB0252	MH20_bin93.metabat2	Bacteria	Actinobacteriota	Actinomycetia	Actinomycetales	Beutenbergiaceae	Salana	Unassign	389	59749	3728075	72.69	12300	90.38	1.16	18
SGB0253	MH20_bin94.metabat2	Bacteria	Proteobacteria	Gammaproteobacteria	Xanthomonadales	Xanthomonadaceae	Stenotrophomonas	Stenotrophomonas geniculata	321	108986	4212209	66.71	19212	72.76	7.76	29
SGB0254	MH20_bins1.concoct	Bacteria	Bacteroidota	Bacteroidia	J057	Unassign	Unassign	Unassign	531	17048	1976823	54.63	3866	59.95	0	0
SGB0255	MH20_bins108.concoct	Bacteria	Bacteroidota	Bacteroidia	AKYH767	B-17BO	UBA2475	Unassign	551	47529	4106525	37.92	9261	89.98	1.59	2
SGB0256	MH20_bins112.concoct	Bacteria	Actinobacteriota	Actinomycetia	Actinomycetales	Beutenbergiaceae	Salana	Unassign	143	142065	3606478	65.9	38113	93.12	1.16	16
SGB0257	MH20_bins113.concoct	Bacteria	Planctomycetota	Planctomycetia	Pirellulales	Lacipirellulaceae	Botrimarina	Unassign	484	70670	4958077	62.98	13517	87.67	4.6	0
SGB0258	MH20_bins123.concoct	Bacteria	Proteobacteria	Gammaproteobacteria	Burkholderiales	Burkholderiaceae	Comamonas	Comamonas koreensis	469	51633	4535119	64.25	13282	64.26	3.45	0
SGB0259	MH20_bins130.concoct	Bacteria	Proteobacteria	Gammaproteobacteria	Burkholderiales	Burkholderiaceae	Corticimicrobacter	Unassign	133	107718	3323531	61.5	38598	98.27	0.89	8
SGB0260	MH20_bins148.concoct	Bacteria	Proteobacteria	Alphaproteobacteria	Rhodobacterales	Rhodobacteraceae	Ketogulonicigenium	Unassign	95	146973	4070889	64.26	71663	98.16	1.6	50
SGB0261	MH20_bins154.concoct	Bacteria	Verrucomicrobiota	Verrucomicrobiae	Verrucomicrobiales	Akkermansiaceae	Haloferula	Unassign	611	62657	6688311	64	15209	71.03	3.45	0
SGB0262	MH20_bins159.concoct	Bacteria	Proteobacteria	Gammaproteobacteria	Pseudomonadales	Moraxellaceae	Acinetobacter	Unassign	192	120378	3513149	35.63	32808	95.69	2.59	19
SGB0263	MH20_bins180.concoct	Bacteria	Actinobacteriota	Thermoleophilia	Solirubrobacterales	1970-09-01	67-14	Unassign	203	125723	3262718	67.21	25180	98.13	1.01	1
SGB0264	MH20_bins19.concoct	Bacteria	Proteobacteria	Alphaproteobacteria	Geminicoccales	Geminicoccaceae	Arboricoccus	Unassign	756	18465	2574760	68.09	3444	50.13	1.19	0
SGB0265	MH20_bins211.concoct	Bacteria	Actinobacteriota	Acidimicrobiia	Acidimicrobiales	UBA8139	Unassign	Unassign	1048	29361	5631714	72.34	6135	74.57	4.44	4
SGB0266	MH20_bins213.concoct	Bacteria	Proteobacteria	Gammaproteobacteria	Burkholderiales	Burkholderiaceae	Inhella	Unassign	160	186075	5236667	67.37	55082	94.11	7.58	3
SGB0267	MH20_bins222.concoct	Bacteria	Bacteroidota	Bacteroidia	Flavobacteriales	Flavobacteriaceae	Flavobacterium	Flavobacterium odoratum	496	34739	2951564	36.59	7411	86.7	2.41	4
SGB0268	MH20_bins224.concoct	Bacteria	Verrucomicrobiota	Verrucomicrobiae	Unassign	Unassign	Unassign	Unassign	1045	15061	3694624	61.41	3644	53.39	1.35	0
SGB0269	MH20_bins239.concoct	Bacteria	Actinobacteriota	Actinomycetia	Mycobacteriales	Nakamurellaceae	Nakamurella	Unassign	854	14785	3004729	69.08	3638	51.77	2.18	0
SGB0270	MH20_bins42.concoct	Bacteria	Proteobacteria	Alphaproteobacteria	Rhizobiales	Devosiaceae	Devosia	Unassign	206	113509	4623419	62.6	44159	86.9	4	0
SGB0271	MH20_bins43.concoct	Bacteria	Proteobacteria	Gammaproteobacteria	Burkholderiales	Burkholderiaceae	Comamonas	Comamonas terrigena	279	106385	4918877	65.17	29078	91.8	9.51	0
SGB0272	MH20_bins47.concoct	Bacteria	Proteobacteria	Gammaproteobacteria	Burkholderiales	Burkholderiaceae	Lampropedia	Unassign	593	46347	3099852	54.49	5985	86.14	1.94	0
SGB0273	MH20_bins51.concoct	Bacteria	Proteobacteria	Alphaproteobacteria	Acetobacterales	Acetobacteraceae	Roseomonas_B	Unassign	307	67847	3850829	70.87	17246	81.92	1.49	0
SGB0274	MH20_bins61.concoct	Bacteria	Bacteroidota	Bacteroidia	Chitinophagales	Chitinophagaceae	Edaphocola	Unassign	401	56113	3123345	37.04	9804	90.89	3.2	4
SGB0275	MH20_bins65.concoct	Bacteria	Proteobacteria	Alphaproteobacteria	Rhizobiales	Xanthobacteraceae	Xanthobacter	Unassign	497	30570	3740374	65.3	9107	83.34	1.37	0
SGB0276	MH20_bins94.concoct	Bacteria	Planctomycetota	Phycisphaerae	Tepidisphaerales	Tepidisphaeraceae	Unassign	Unassign	832	14561	3291819	55.42	4104	63.1	3.41	0
SGB0277	RS-A001.bins005.maxbin	Bacteria	Proteobacteria	Gammaproteobacteria	Steroidobacterales	Steroidobacteraceae	Unassign	Unassign	67	279722	3623968	64.58	110362	97.38	2.55	9
SGB0278	RS-A001.bins010.maxbin	Bacteria	Patescibacteria	Saccharimonadia	Saccharimonadales	UBA4665	PMNU01	Unassign	25	394309	1241697	53.11	255256	69.14	1.85	0
SGB0279	RS-A001.bins076.maxbin	Bacteria	Bacteroidota	Ignavibacteria	SJA-28	OLB5	Unassign	Unassign	651	20436	2383960	38.12	3688	60.34	2.29	0
SGB0280	RS-A001_bin1.metabat2	Bacteria	Proteobacteria	Gammaproteobacteria	Steroidobacterales	Steroidobacteraceae	FEN-1191	Unassign	237	61120	2447919	66.81	14645	51.02	1.72	1
SGB0281	RS-A001_bin12.metabat2	Bacteria	Verrucomicrobiota	Verrucomicrobiae	Methylacidiphilales	Unassign	Unassign	Unassign	50	202321	2989541	59	84063	98.65	0.68	0
SGB0282	RS-A001_bin20.metabat2	Bacteria	Proteobacteria	Alphaproteobacteria	Rhizobiales	Xanthobacteraceae	Pseudolabrys	Unassign	805	74267	4242549	59.27	5553	53.79	2.07	0
SGB0283	RS-A001_bin26.metabat2	Bacteria	Acidobacteriota	Acidobacteriae	Bryobacterales	Bryobacteraceae	Unassign	Unassign	578	19316	2643521	61.84	4742	67.32	0.88	1
SGB0284	RS-A001_bin32.metabat2	Bacteria	Acidobacteriota	Acidobacteriae	Acidoferrales	UBA7541	Acidoferrum	Unassign	151	159112	4777293	57.59	62934	91.71	4.79	0
SGB0285	RS-A001_bin35.metabat2	Bacteria	Planctomycetota	Planctomycetia	Pirellulales	Unassign	Unassign	Unassign	442	44591	4178418	57.35	12944	82.69	1.72	0
SGB0286	RS-A001_bin39.metabat2	Bacteria	Proteobacteria	Gammaproteobacteria	Steroidobacterales	Steroidobacteraceae	Unassign	Unassign	196	101568	3513549	59.19	25130	95.46	2.09	0
SGB0287	RS-A001_bin46.metabat2	Bacteria	Myxococcota	Polyangia	Palsa-1104_A	Fen-1088	JADGRB01	Unassign	929	24429	4472177	70.65	5107	58.3	2.8	0
SGB0288	RS-A001_bin49.metabat2	Bacteria	Acidobacteriota	Acidobacteriae	Bryobacterales	Bryobacteraceae	JADJWL01	Unassign	361	161380	7176578	60.44	36282	96.2	6.82	8
SGB0289	RS-A001_bin57.metabat2	Bacteria	Bacteroidota	Bacteroidia	Chitinophagales	Chitinophagaceae	VBAT01	Unassign	230	139351	6174968	42.85	41092	96.39	0.54	1
SGB0290	RS-A001_bin6.metabat2	Bacteria	Actinobacteriota	Acidimicrobiia	IMCC26256	PALSA-555	Unassign	Unassign	624	12296	2481234	68.37	3888	53.44	1.28	0
SGB0291	RS-A001_bins11.concoct	Bacteria	Proteobacteria	Alphaproteobacteria	Rhizobiales	Xanthobacteraceae	AP-16	Unassign	1035	25029	6025265	67.68	6565	62.41	1.72	0
SGB0292	RS-A001_bins17.concoct	Bacteria	Proteobacteria	Gammaproteobacteria	Steroidobacterales	Steroidobacteraceae	13-2-20CM-66-19	Unassign	1118	55751	9982682	61.64	10894	65.52	2.59	12
SGB0293	RS-A001_bins33.concoct	Bacteria	Planctomycetota	Planctomycetia	Pirellulales	Lacipirellulaceae	JABDGM01	Unassign	495	68739	4316643	59.62	10396	63.02	1.15	0
SGB0294	RS-A001_bins5.concoct	Bacteria	Actinobacteriota	Actinomycetia	Mycobacteriales	Micromonosporaceae	EFPC-2	Unassign	729	50181	6195850	70.51	10332	82.01	1.75	3
SGB0295	RS-A001_bins55.concoct	Bacteria	Actinobacteriota	Actinomycetia	Mycobacteriales	Frankiaceae	Unassign	Unassign	568	34364	4155483	69.8	8173	55.07	2.18	75
SGB0296	RS-A001_bins66.concoct	Bacteria	Actinobacteriota	UBA4738	UBA4738	HRBIN12	AC-51	Unassign	497	10668	1750960	69.88	3683	63.37	3.59	0
SGB0297	RS-A003_bin11.metabat2	Bacteria	Acidobacteriota	Acidobacteriae	Bryobacterales	Bryobacteraceae	Unassign	Unassign	485	10736	1893248	61.97	3859	52.13	0	0
SGB0298	RS-A003_bin13.metabat2	Bacteria	Proteobacteria	Alphaproteobacteria	Rhizobiales	Xanthobacteraceae	Pseudolabrys	Unassign	1232	61302	7138536	58.78	6284	73.61	9.44	2
SGB0299	RS-A003_bin17.metabat2	Bacteria	Proteobacteria	Gammaproteobacteria	Enterobacterales	Enterobacteriaceae	Enterobacter	Enterobacter asburiae_A	349	85400	3730269	56.25	17937	87.63	0.88	9
SGB0300	RS-A004_bin2.metabat2	Bacteria	Patescibacteria	Saccharimonadia	Saccharimonadales	UBA4665	Unassign	Unassign	85	49309	1223904	52.05	22583	67.33	0.99	0
SGB0301	RS-A005_bin14.metabat2	Bacteria	Bacteroidota	Bacteroidia	Flavobacteriales	Flavobacteriaceae	Flavobacterium	Unassign	559	29582	3159106	34.33	6172	75.7	0.35	4
SGB0302	RS-A005_bin16.metabat2	Bacteria	Firmicutes	Bacilli	Bacillales_B	DSM-18226	Neobacillus	Neobacillus sp000686805	603	77530	5078472	38.54	11521	88.16	5.16	0
SGB0303	RS-A005_bin24.metabat2	Bacteria	Proteobacteria	Alphaproteobacteria	Sphingomonadales	Sphingomonadaceae	Novosphingobium	Unassign	519	25879	2504250	63.44	5039	58.06	1.13	0
SGB0304	RS-A005_bin31.metabat2	Bacteria	Desulfobacterota_B	Binatia	UBA9968	UBA9968	Unassign	Unassign	433	19072	1805892	54.34	4183	55.71	0.6	0
SGB0305	RS-A005_bins17.concoct	Bacteria	Acidobacteriota	Blastocatellia	Pyrinomonadales	Pyrinomonadaceae	PSRF01	Unassign	584	123548	6832449	54.83	16556	91.97	5.98	62
SGB0306	RS-A005_bins7.concoct	Bacteria	Proteobacteria	Gammaproteobacteria	Burkholderiales	Burkholderiaceae	Variovorax	Variovorax gossypii	742	59731	7156319	67.58	12687	92.3	2.63	34
SGB0307	RS-A006.bins051.maxbin	Bacteria	Acidobacteriota	Blastocatellia	Pyrinomonadales	Pyrinomonadaceae	UBA11740	Unassign	369	25286	1788928	56.49	5500	50.47	4.18	1
SGB0308	RS-A006.bins172.maxbin	Bacteria	Chloroflexota	Limnocylindria	Limnocylindrales	CSP1-4	CSP1-4	Unassign	502	15203	1980595	70.64	4256	59.21	1.49	0
SGB0309	RS-A006_bin1.metabat2	Bacteria	Proteobacteria	Alphaproteobacteria	Micropepsales	Micropepsaceae	Rhizomicrobium	Unassign	94	132032	3189536	60.66	52203	93.71	5.22	2
SGB0310	RS-A006_bin109.metabat2	Bacteria	Acidobacteriota	Acidobacteriae	VXMN01	VXMN01	VFZK01	Unassign	498	35192	2703360	54.71	5788	56.68	2.61	0
SGB0311	RS-A006_bin110.metabat2	Bacteria	Actinobacteriota	Thermoleophilia	Solirubrobacterales	1970-09-01	WHSW01	Unassign	283	43271	2166746	70.42	8828	77.17	0	0
SGB0312	RS-A006_bin112.metabat2	Bacteria	Actinobacteriota	UBA4738	UBA4738	HRBIN12	AC-69	Unassign	157	63690	2306452	68.21	22143	94.87	3.7	0
SGB0313	RS-A006_bin15.metabat2	Bacteria	Acidobacteriota	CAIWXX01	Unassign	Unassign	Unassign	Unassign	607	18955	3119533	48.62	5479	66.25	1.76	0
SGB0314	RS-A006_bin29.metabat2	Bacteria	Desulfobacterota_B	Binatia	UBA9968	UBA9968	Unassign	Unassign	312	80852	3885564	61.86	19190	94.42	9.73	1
SGB0315	RS-A006_bin39.metabat2	Bacteria	Proteobacteria	Alphaproteobacteria	Micropepsales	Micropepsaceae	Rhizomicrobium	Unassign	259	53088	2956251	60.02	15106	71.87	0	1
SGB0316	RS-A006_bin4.metabat2	Bacteria	Proteobacteria	Alphaproteobacteria	Rhizobiales	Methyloligellaceae	Methyloceanibacter	Unassign	222	48271	2061142	61.89	12516	82.51	3.18	0
SGB0317	RS-A006_bin42.metabat2	Bacteria	Myxococcota_A	UBA9160	UBA9160	Unassign	Unassign	Unassign	563	21031	2744087	71.13	5220	56.37	1.94	2
SGB0318	RS-A006_bin49.metabat2	Bacteria	Gemmatimonadota	Gemmatimonadetes	Gemmatimonadales	GWC2-71-9	Unassign	Unassign	448	35718	3402573	64.23	9383	75.85	5.49	0
SGB0319	RS-A006_bin69.metabat2	Bacteria	Verrucomicrobiota	Verrucomicrobiae	Chthoniobacterales	UBA10450	Udaeobacter	Unassign	331	20947	1949842	55.33	6527	53.69	1.39	0
SGB0320	RS-A006_bin73.metabat2	Bacteria	Proteobacteria	Gammaproteobacteria	Burkholderiales	Burkholderiaceae	Variovorax	Variovorax gossypii	562	69618	6881410	68.13	17542	92.37	2.59	59
SGB0321	RS-A006_bin77.metabat2	Bacteria	Verrucomicrobiota	Verrucomicrobiae	Chthoniobacterales	UBA10450	AV40	Unassign	270	63282	2357079	55.88	11759	83.01	2	0
SGB0322	RS-A006_bin83.metabat2	Bacteria	Proteobacteria	Gammaproteobacteria	Enterobacterales	Enterobacteriaceae	Pantoea	Pantoea cancerogena_A	451	104227	4586748	54.35	12674	89.24	9.6	23
SGB0323	RS-A006_bin86.metabat2	Bacteria	Actinobacteriota	Actinomycetia	Unassign	Unassign	Unassign	Unassign	557	26145	3043925	67.01	6040	78.1	3.95	0
SGB0324	RS-A006_bin88.metabat2	Bacteria	Acidobacteriota	Acidobacteriae	Acidoferrales	UBA7541	Acidoferrum	Unassign	596	20279	2646095	60.27	4463	57.62	1.28	0
SGB0325	RS-A006_bin98.metabat2	Bacteria	Proteobacteria	Gammaproteobacteria	Burkholderiales	Casimicrobiaceae	PALSA-1003	Unassign	298	55100	2818403	64.77	14212	71.03	9.48	0
SGB0326	RS-A006_bins11.concoct	Bacteria	Actinobacteriota	Actinomycetia	Mycobacteriales	Micromonosporaceae	Unassign	Unassign	946	24245	4342712	67.99	5035	59.82	4.21	50
SGB0327	RS-A006_bins40.concoct	Bacteria	Patescibacteria	Saccharimonadia	UBA4664	UBA4664	UBA5169	Unassign	164	27068	1158533	56.39	9886	71.78	0.23	0
SGB0328	RS-A006_bins5.concoct	Bacteria	Acidobacteriota	Thermoanaerobaculia	UBA5066	Gp7-AA6	Unassign	Unassign	386	48595	4087988	67.64	13644	85.45	2.56	1
SGB0329	RS-A006_bins72.concoct	Bacteria	Chloroflexota	Limnocylindria	P2-11E	P2-11E	CF-39	Unassign	198	53904	2491241	67.98	15249	80.97	0	0
SGB0330	RS-A007.bins010.maxbin	Bacteria	Proteobacteria	Alphaproteobacteria	Rhizobiales	Methyloligellaceae	Methyloceanibacter	Unassign	187	29271	1149701	63.33	9172	58.67	4.25	0
SGB0331	RS-A007_bin10.metabat2	Bacteria	Actinobacteriota	UBA4738	UBA4738	HRBIN12	AC-51	Unassign	421	22548	2208207	71.05	5844	72.55	1.71	0
SGB0332	RS-A007_bin20.metabat2	Bacteria	Actinobacteriota	Acidimicrobiia	IMCC26256	PALSA-555	Unassign	Unassign	189	94927	3116523	69.73	27538	81.99	7.26	0
SGB0333	RS-A007_bin21.metabat2	Bacteria	Actinobacteriota	Actinomycetia	Mycobacteriales	Mycobacteriaceae	Mycobacterium	Unassign	196	193923	7018466	65.93	54998	98.11	0.95	35
SGB0334	RS-A007_bin7.metabat2	Bacteria	Actinobacteriota	Thermoleophilia	Gaiellales	Gaiellaceae	Palsa-739	Unassign	220	56692	2305115	69.9	13629	65.22	0.36	1
SGB0335	RS-A008_bin12.metabat2	Bacteria	Proteobacteria	Alphaproteobacteria	Rhizobiales	Methyloligellaceae	Methyloceanibacter	Unassign	319	36117	2037340	65.21	7747	73.28	4.08	0
SGB0336	RS-A008_bin14.metabat2	Bacteria	Acidobacteriota	Blastocatellia	Pyrinomonadales	Pyrinomonadaceae	PSRF01	Unassign	859	26503	4988574	52.48	6308	77.74	6.15	0
SGB0337	RS-A008_bin18.metabat2	Bacteria	Chloroflexota	Limnocylindria	QHBO01	QHBO01	Unassign	Unassign	181	74844	2455442	70.79	21710	94.44	1.85	0
SGB0338	RS-A008_bin20.metabat2	Bacteria	Actinobacteriota	UBA4738	UBA4738	HRBIN12	AC-51	Unassign	413	23210	2519056	69.96	6887	79.01	3.99	0
SGB0339	RS-A008_bin21.metabat2	Bacteria	Actinobacteriota	Thermoleophilia	Solirubrobacterales	1970-09-01	Unassign	Unassign	242	46848	2166354	68.04	11215	82.73	0.25	0
SGB0340	RS-A008_bin24.metabat2	Bacteria	Acidobacteriota	Acidobacteriae	Acidoferrales	UBA7541	Acidoferrum	Unassign	547	35656	3916074	61.35	8556	78.98	5.18	0
SGB0341	RS-A008_bin31.metabat2	Bacteria	Proteobacteria	Alphaproteobacteria	Rhizobiales	Hyphomicrobiaceae	AWTP1-13	Unassign	1050	13069	4187749	63.23	3923	54.25	0.89	0
SGB0342	RS-A008_bin36.metabat2	Bacteria	Proteobacteria	Alphaproteobacteria	Rhizobiales	Xanthobacteraceae	VAZQ01	Unassign	1007	39624	5948748	65.96	6728	79	7.91	4
SGB0343	RS-A008_bin38.metabat2	Bacteria	Actinobacteriota	Thermoleophilia	Solirubrobacterales	1970-09-01	VAYN01	Unassign	109	130986	2558529	68.5	32950	96.87	4.37	0
SGB0344	RS-A008_bins1.concoct	Bacteria	Acidobacteriota	Thermoanaerobaculia	Gp7-AA8	Gp7-AA8	QHVT01	Unassign	983	16254	3769926	63.28	4121	65.74	0.85	0
SGB0345	RS-A008_bins15.concoct	Bacteria	Bacteroidota	Bacteroidia	Flavobacteriales	Weeksellaceae	Chryseobacterium	Chryseobacterium sp002979455	694	14686	2260571	36.46	3337	51.93	0.33	0
SGB0346	RS-A008_bins46.concoct	Bacteria	Verrucomicrobiota	Verrucomicrobiae	Chthoniobacterales	Unassign	Unassign	Unassign	149	161039	2980232	60.63	37639	98.99	2.03	0
SGB0347	RS-A011.bins021.maxbin	Bacteria	Proteobacteria	Gammaproteobacteria	Steroidobacterales	Steroidobacteraceae	CAILZL01	Unassign	531	18943	2381699	59.84	4895	60.38	2.45	0
SGB0348	RS-A011_bin16.metabat2	Bacteria	Proteobacteria	Gammaproteobacteria	Steroidobacterales	Steroidobacteraceae	CAILZL01	Unassign	82	327440	3845821	56.56	63501	96.7	3.73	13
SGB0349	RS-A011_bin4.metabat2	Bacteria	Proteobacteria	Alphaproteobacteria	Caulobacterales	TH1-2	Terricaulis	Unassign	496	56403	3544232	62.12	8486	78.36	5.71	0
SGB0350	RS-A011_bin9.metabat2	Bacteria	Proteobacteria	Gammaproteobacteria	Steroidobacterales	Steroidobacteraceae	FEN-1191	Unassign	263	225281	3204426	66.23	17120	85.24	5.43	2
SGB0351	RS-A011_bins39.concoct	Bacteria	Acidobacteriota	Blastocatellia	RBC074	RBC074	JADJLO01	Unassign	1369	12318	4224446	54.66	3079	53.25	1.71	0
SGB0352	RS-A012.bins008.maxbin	Bacteria	Proteobacteria	Gammaproteobacteria	Steroidobacterales	Steroidobacteraceae	CAILZL01	Unassign	112	178205	4827613	54.23	86857	94.73	2.85	6
SGB0353	RS-A012_bin14.metabat2	Bacteria	Proteobacteria	Gammaproteobacteria	Steroidobacterales	Steroidobacteraceae	CAILZL01	Unassign	102	269976	5079428	53.78	97998	96.58	2.3	3
SGB0354	RS-A012_bin16.metabat2	Bacteria	Proteobacteria	Gammaproteobacteria	Steroidobacterales	Steroidobacteraceae	13-2-20CM-66-19	Unassign	989	189719	9036939	61.67	12207	73.24	8.14	1
SGB0355	RS-A012_bin27.metabat2	Bacteria	Proteobacteria	Gammaproteobacteria	Steroidobacterales	Steroidobacteraceae	CAILZL01	Unassign	156	194234	4982654	57.81	62673	94.77	4.7	64
SGB0356	RS-A012_bin35.metabat2	Bacteria	Acidobacteriota	Blastocatellia	Pyrinomonadales	Pyrinomonadaceae	PSRF01	Unassign	829	37333	4156172	50.95	5270	74.09	1.74	16
SGB0357	RS-A012_bin7.metabat2	Bacteria	Proteobacteria	Alphaproteobacteria	Caulobacterales	Caulobacteraceae	BOG-935	Unassign	742	19904	3520921	68.7	5028	65.66	4.19	1
SGB0358	RS-A012_bins65.concoct	Bacteria	Acidobacteriota	Acidobacteriae	20CM-2-55-15	20CM-2-55-15	20CM-2-55-15	Unassign	735	15265	2729902	54.46	3935	66.1	3.94	0
SGB0359	RS-A016_bin2.metabat2	Bacteria	Proteobacteria	Alphaproteobacteria	Sphingomonadales	Sphingomonadaceae	Sphingomonas	Sphingomonas sp002280565	480	22964	2601568	65.81	5946	71.31	1.85	11
SGB0360	RS-A016_bin7.metabat2	Bacteria	Actinobacteriota	Thermoleophilia	Solirubrobacterales	1970-09-01	Unassign	Unassign	189	67359	2361097	68.07	18051	96.12	2.16	0
SGB0361	RS-A016_bins39.concoct	Bacteria	Actinobacteriota	Actinomycetia	Actinomycetales	Microbacteriaceae	Pseudolysinimonas	Unassign	514	10906	1760044	71.05	3518	54.49	0.83	0
SGB0362	RS-A017.bins008.maxbin	Bacteria	Proteobacteria	Alphaproteobacteria	Caulobacterales	TH1-2	Terricaulis	Unassign	103	149272	3104565	60.93	61655	95.78	1.22	11
SGB0363	RS-A017.bins010.maxbin	Bacteria	Proteobacteria	Gammaproteobacteria	Steroidobacterales	Steroidobacteraceae	FEN-1191	Unassign	29	281539	1864264	64.46	114444	54.8	0.82	3
SGB0364	RS-A017.bins054.maxbin	Bacteria	Bacteroidota	Bacteroidia	Chitinophagales	Chitinophagaceae	Chitinophaga	Unassign	869	12802	2702944	44.92	3047	57.45	0.49	0
SGB0365	RS-A017_bin14.metabat2	Bacteria	Proteobacteria	Gammaproteobacteria	Burkholderiales	Burkholderiaceae	JAFEEF01	Unassign	273	170934	6586544	68.55	41011	94.99	4.07	56
SGB0366	RS-A017_bin18.metabat2	Bacteria	Actinobacteriota	Thermoleophilia	Solirubrobacterales	1970-09-01	VAYN01	Unassign	518	32199	3397291	69.89	7886	83.71	0.99	0
SGB0367	RS-A017_bin20.metabat2	Bacteria	Proteobacteria	Gammaproteobacteria	Steroidobacterales	Steroidobacteraceae	FEN-1191	Unassign	88	243654	2832178	64.72	54726	92.58	1.93	0
SGB0368	RS-A017_bin23.metabat2	Bacteria	Proteobacteria	Gammaproteobacteria	Steroidobacterales	Steroidobacteraceae	Povalibacter	Unassign	539	40082	3462835	61.99	7363	84.43	6.1	0
SGB0369	RS-A017_bin29.metabat2	Bacteria	Acidobacteriota	Acidobacteriae	Acidobacteriales	Acidobacteriaceae	Terracidiphilus	Unassign	383	62333	3832283	61.19	12703	65.23	0	1
SGB0370	RS-A017_bin32.metabat2	Bacteria	Acidobacteriota	Acidobacteriae	Acidobacteriales	Acidobacteriaceae	Edaphobacter	Unassign	319	86466	4775305	57.64	20120	84.38	3.45	2
SGB0371	RS-A017_bin37.metabat2	Bacteria	Bacteroidota	Bacteroidia	Flavobacteriales	Blattabacteriaceae	Unassign	Unassign	17	65623	334742	31.21	27480	62.03	0	0
SGB0372	RS-A017_bin38.metabat2	Bacteria	Proteobacteria	Gammaproteobacteria	Enterobacterales	Enterobacteriaceae	Unassign	Unassign	337	62305	3394738	58	13098	88.52	2.06	9
SGB0373	RS-A017_bin39.metabat2	Bacteria	Proteobacteria	Alphaproteobacteria	Rhizobiales	Rhizobiaceae	Rhizobium	Rhizobium multihospitium	916	74030	5992525	59.39	7382	70.34	2.21	7
SGB0374	RS-A017_bin4.metabat2	Bacteria	Proteobacteria	Alphaproteobacteria	Micropepsales	Micropepsaceae	Unassign	Unassign	449	26564	2306005	65.45	5772	72.58	1.47	0
SGB0375	RS-A017_bin40.metabat2	Bacteria	Bacteroidota	Bacteroidia	Chitinophagales	Chitinophagaceae	Puia	Unassign	342	122553	6320316	54.54	30113	91.14	2.71	1
SGB0376	RS-A017_bin41.metabat2	Bacteria	Proteobacteria	Gammaproteobacteria	Steroidobacterales	Steroidobacteraceae	CAILZL01	Unassign	196	73245	3142785	59.49	27743	91.04	3.26	3
SGB0377	RS-A017_bin8.metabat2	Bacteria	Proteobacteria	Alphaproteobacteria	Rhizobiales	Xanthobacteraceae	JAFAXD01	Unassign	414	45484	3848763	61.79	13045	82.42	2.27	1
SGB0378	RS-A017_bins59.concoct	Bacteria	Proteobacteria	Alphaproteobacteria	Dongiales	Dongiaceae	SSEL01	Unassign	782	26664	3672503	62.03	5383	55.41	0	0
SGB0379	RS-A020.bins005.maxbin	Bacteria	Verrucomicrobiota	Verrucomicrobiae	Chthoniobacterales	UBA10450	AV40	Unassign	327	15347	1158675	55.38	3720	57.78	1.42	0
SGB0380	RS-A020_bin5.metabat2	Bacteria	Proteobacteria	Alphaproteobacteria	Caulobacterales	Caulobacteraceae	Brevundimonas	Brevundimonas sp006547065	312	48405	3360066	67.45	14172	95.54	0.77	3
SGB0381	RS-A020_bins20.concoct	Bacteria	Acidobacteriota	Blastocatellia	Pyrinomonadales	Pyrinomonadaceae	PSRF01	Unassign	1323	16465	5198709	55.2	4173	58.05	2.99	0
SGB0382	RS-A020_bins38.concoct	Bacteria	Actinobacteriota	Thermoleophilia	Solirubrobacterales	Solirubrobacteraceae	Unassign	Unassign	362	68464	5376213	73.27	17990	85.16	1.71	10
SGB0383	RS-A021.bins007.maxbin	Bacteria	Proteobacteria	Gammaproteobacteria	Enterobacterales	Enterobacteriaceae	Citrobacter	Unassign	502	136709	4997418	51.79	21897	72.18	6.82	16
SGB0384	RS-A021_bin2.metabat2	Bacteria	Acidobacteriota	Vicinamibacteria	Vicinamibacterales	UBA2999	2-12-FULL-65-11	Unassign	611	24578	3469794	64.74	6334	73.01	2.56	0
SGB0385	RS-A021_bin20.metabat2	Bacteria	Bacteroidota	Bacteroidia	Flavobacteriales	Flavobacteriaceae	Flavobacterium	Flavobacterium sp016735615	84	309075	4994251	33.61	85888	98.59	0.4	6
SGB0386	RS-A021_bin22.metabat2	Bacteria	Actinobacteriota	UBA4738	UBA4738	HRBIN12	DSRY01	Unassign	362	16138	1758068	69.75	5082	52.47	1.57	0
SGB0387	RS-A021_bin32.metabat2	Bacteria	Acidobacteriota	Thermoanaerobaculia	UBA5704	UBA5704	UBA5704	Unassign	843	67470	7192128	69.03	10882	89.74	4.33	11
SGB0388	RS-A021_bin35.metabat2	Bacteria	Patescibacteria	Saccharimonadia	Saccharimonadales	UBA4665	PMNU01	Unassign	34	88541	1039537	53.67	46973	66.67	0	0
SGB0389	RS-A021_bin36.metabat2	Bacteria	Bacteroidota	Bacteroidia	Flavobacteriales	Weeksellaceae	Chryseobacterium	Unassign	135	227763	5184022	35.24	60315	100	0.98	3
SGB0390	RS-A021_bin37.metabat2	Bacteria	Actinobacteriota	Actinomycetia	Mycobacteriales	Jatrophihabitantaceae	Iso899	Unassign	60	220088	3808719	64.06	101855	93.81	1.09	20
SGB0391	RS-A021_bin52.metabat2	Bacteria	Proteobacteria	Alphaproteobacteria	Rhizobiales	Rhizobiaceae	Ensifer	Ensifer sp900469595	491	83786	6640303	62.43	20670	94.3	3.72	0
SGB0392	RS-A021_bin67.metabat2	Bacteria	Actinobacteriota	Actinomycetia	Streptomycetales	Streptomycetaceae	Streptomyces	Unassign	806	16061	3099951	70.64	3762	50.2	0	0
SGB0393	RS-A021_bin68.metabat2	Bacteria	Nitrospirota	Nitrospiria	Nitrospirales	Nitrospiraceae	Palsa-1315	Unassign	325	34030	2723441	54.83	10142	81.36	2.78	0
SGB0394	RS-A021_bins29.concoct	Bacteria	Actinobacteriota	Actinomycetia	Mycobacteriales	Mycobacteriaceae	Nocardia	Nocardia vinacea	289	267065	10045773	65.45	56392	98.75	4.2	331
SGB0395	RS-A021_bins30.concoct	Bacteria	Proteobacteria	Gammaproteobacteria	Burkholderiales	Burkholderiaceae	Comamonas	Unassign	74	386988	4670019	61.26	120228	98.97	1.04	5
SGB0396	RS-A021_bins4.concoct	Bacteria	Proteobacteria	Gammaproteobacteria	Enterobacterales	Aeromonadaceae	Aeromonas	Unassign	796	39352	3481973	63.75	4843	71.85	2.92	0
SGB0397	RS-A021_bins46.concoct	Bacteria	Actinobacteriota	Acidimicrobiia	Acidimicrobiales	Unassign	Unassign	Unassign	365	45596	2831982	70.52	8942	65.65	0.85	34
SGB0398	RS-A022_bin34.metabat2	Bacteria	Proteobacteria	Alphaproteobacteria	Rhizobiales	Methyloligellaceae	Methyloceanibacter	Unassign	399	19272	1810149	61.96	4636	63.93	0.97	0
SGB0399	RS-A022_bin58.metabat2	Bacteria	Verrucomicrobiota	Verrucomicrobiae	Chthoniobacterales	JAFAMB01	Unassign	Unassign	948	24582	4887819	55.25	5435	65.8	3.45	0
SGB0400	RS-A022_bins17.concoct	Bacteria	Proteobacteria	Gammaproteobacteria	Burkholderiales	Burkholderiaceae	Comamonas	Comamonas terrigena	175	171279	4498801	65.14	42589	94.63	3.28	0
SGB0401	RS-A023_bin17.metabat2	Bacteria	Actinobacteriota	Acidimicrobiia	Acidimicrobiales	QHCF01	AC-9	Unassign	450	27783	2457404	67.13	6159	64.36	1.71	0
SGB0402	RS-A023_bin20.metabat2	Bacteria	Proteobacteria	Gammaproteobacteria	Burkholderiales	Burkholderiaceae	Comamonas	Comamonas aquatica	382	18774	1790381	65.98	4942	51.6	3.56	0
SGB0403	RS-A023_bin30.metabat2	Bacteria	Verrucomicrobiota	Verrucomicrobiae	Chthoniobacterales	UBA10450	AV40	Unassign	220	87137	2854211	55.28	17665	96.2	3.04	0
SGB0404	RS-A023_bins13.concoct	Bacteria	Dormibacterota	Dormibacteria	UBA8260	UBA8260	Unassign	Unassign	398	13450	1802147	67.25	4873	67.9	1.85	0
SGB0405	RS-A023_bins37.concoct	Bacteria	Proteobacteria	Gammaproteobacteria	Pseudomonadales	Moraxellaceae	Acinetobacter	Acinetobacter johnsonii	469	56497	2079198	41.64	4494	57.65	3.27	4
SGB0406	RS-A024.bins007.maxbin	Bacteria	Proteobacteria	Gammaproteobacteria	Pseudomonadales	Moraxellaceae	Acinetobacter	Unassign	588	14110	1951873	40.07	3325	50.78	3.45	3
SGB0407	RS-A024_bin26.metabat2	Bacteria	Actinobacteriota	Acidimicrobiia	Acidimicrobiales	Palsa-688	JAFAWZ01	Unassign	210	100437	2993483	68.84	21648	97.83	2.42	2
SGB0408	RS-A024_bin29.metabat2	Bacteria	Proteobacteria	Alphaproteobacteria	Rhizobiales	Xanthobacteraceae	VAZQ01	Unassign	697	36156	4111639	64.42	6832	77.54	8.54	1
SGB0409	RS-A024_bins13.concoct	Bacteria	Proteobacteria	Gammaproteobacteria	Pseudomonadales	Moraxellaceae	Acinetobacter	Acinetobacter soli	271	48575	2716667	43.83	12627	91.43	3.79	3
SGB0410	RS-A024_bins38.concoct	Bacteria	Actinobacteriota	Actinomycetia	Mycobacteriales	Mycobacteriaceae	Mycobacterium	Unassign	1151	12111	3892119	66.19	3331	54.38	2.52	0
SGB0411	RS-A024_bins54.concoct	Bacteria	Chloroflexota	Ktedonobacteria	Ktedonobacterales	Ktedonobacteraceae	Unassign	Unassign	1690	13680	6129400	52.43	3798	70.41	6.58	12
SGB0412	RS-A025.bins057.maxbin	Bacteria	Actinobacteriota	Thermoleophilia	Gaiellales	Gaiellaceae	Palsa-739	Unassign	158	53168	1350174	70.5	12325	61.19	1.88	0
SGB0413	RS-A025.bins061.maxbin	Bacteria	Actinobacteriota	Thermoleophilia	Gaiellales	Gaiellaceae	PALSA-600	Unassign	107	124131	2035908	69.08	31147	55.17	0	0
SGB0414	RS-A025.bins091.maxbin	Bacteria	Eremiobacterota	Eremiobacteria	Eremiobacterales	Eremiobacteraceae	JAFANK01	Unassign	126	68987	1336346	63.11	21013	68.18	0.45	0
SGB0415	RS-A025.bins092.maxbin	Bacteria	Dependentiae	Babeliae	Babeliales	JABDEC01	JABDFA01	Unassign	190	19287	901250	27.89	5227	51.32	0.41	0
SGB0416	RS-A025.bins130.maxbin	Bacteria	Proteobacteria	Gammaproteobacteria	Pseudomonadales	Moraxellaceae	Acinetobacter	Unassign	717	43100	3160458	42.09	4657	50	3.45	3
SGB0417	RS-A025_bin26.metabat2	Bacteria	Proteobacteria	Gammaproteobacteria	Steroidobacterales	Steroidobacteraceae	CAILZL01	Unassign	492	14802	2485525	55.09	5180	58.15	1.09	0
SGB0418	RS-A025_bin42.metabat2	Bacteria	Actinobacteriota	Thermoleophilia	Solirubrobacterales	Solirubrobacteraceae	Palsa-465	Unassign	145	78716	2554970	67.66	29445	82.29	1.71	0
SGB0419	RS-A025_bin46.metabat2	Bacteria	Proteobacteria	Gammaproteobacteria	Steroidobacterales	Steroidobacteraceae	13-2-20CM-66-19	Unassign	187	220232	6492589	60.95	76630	91.96	4.52	19
SGB0420	RS-A025_bin5.metabat2	Bacteria	Proteobacteria	Gammaproteobacteria	Steroidobacterales	Steroidobacteraceae	FEN-1191	Unassign	237	86314	3239715	64.67	19577	51.02	4.31	0
SGB0421	RS-A025_bin53.metabat2	Bacteria	Actinobacteriota	Actinomycetia	Mycobacteriales	Mycobacteriaceae	Mycobacterium	Unassign	745	26920	4065256	67.91	6012	65.67	1.75	55
SGB0422	RS-A025_bin54.metabat2	Bacteria	Acidobacteriota	Thermoanaerobaculia	UBA5704	UBA5704	Unassign	Unassign	895	31798	4748028	70.18	5756	54.35	0	10
SGB0423	RS-A025_bin58.metabat2	Bacteria	Proteobacteria	Gammaproteobacteria	Steroidobacterales	Steroidobacteraceae	CAILZL01	Unassign	73	344389	3652090	58.58	103922	91.72	3.02	3
SGB0424	RS-A025_bin69.metabat2	Bacteria	Verrucomicrobiota	Verrucomicrobiae	Chthoniobacterales	UBA10450	Udaeobacter	Unassign	255	34710	2026658	54.47	10083	70.26	2.7	0
SGB0425	RS-A025_bin73.metabat2	Bacteria	Dormibacterota	Dormibacteria	CF-121	CF-121	CF-13	Unassign	335	51518	2949740	65	11963	84.07	8.3	0
SGB0426	RS-A025_bin83.metabat2	Bacteria	Actinobacteriota	Actinomycetia	Mycobacteriales	Jatrophihabitantaceae	JAFAWL01	Unassign	332	45812	3263912	66.36	14124	71.32	0	7
SGB0427	RS-A025_bins50.concoct	Bacteria	Actinobacteriota	Actinomycetia	Streptosporangiales	Streptosporangiaceae	Chersky-822	Unassign	404	50492	4558704	67	15055	90.15	3.9	0
SGB0428	RS-A026_bin12.metabat2	Bacteria	Proteobacteria	Alphaproteobacteria	Caulobacterales	TH1-2	UBA4763	Unassign	452	27909	2919850	59.93	7375	81.3	1.53	0
SGB0429	RS-A026_bin33.metabat2	Bacteria	Proteobacteria	Alphaproteobacteria	Caulobacterales	TH1-2	Terricaulis	Unassign	114	153852	3671618	63.06	51811	97.02	3	3
SGB0430	RS-A026_bin43.metabat2	Bacteria	Proteobacteria	Alphaproteobacteria	Rhizobiales	Xanthobacteraceae	BOG-931	Unassign	1047	17217	4324515	59.43	4168	53.44	4.32	0
SGB0431	RS-A026_bin5.metabat2	Bacteria	Proteobacteria	Alphaproteobacteria	Caulobacterales	TH1-2	Terricaulis	Unassign	141	95380	2793346	66.87	31527	94.67	1.37	1
SGB0432	RS-A027.bins001.maxbin	Bacteria	Proteobacteria	Gammaproteobacteria	Pseudomonadales	Moraxellaceae	Acinetobacter	Acinetobacter johnsonii	385	40514	1746202	41.41	4780	51	0.89	0
SGB0433	RS-A027_bin105.metabat2	Bacteria	Acidobacteriota	Acidobacteriae	Acidobacteriales	SbA1	Unassign	Unassign	653	22846	3768901	60.6	6413	72.36	1.28	1
SGB0434	RS-A027_bin106.metabat2	Bacteria	Proteobacteria	Gammaproteobacteria	Pseudomonadales	Pseudomonadaceae	Pseudomonas_A	Pseudomonas_A stutzeri	578	43256	3821621	64.34	8229	83.52	6.43	6
SGB0435	RS-A027_bin14.metabat2	Bacteria	Chloroflexota	Limnocylindria	QHBO01	QHBO01	CF-82	Unassign	261	23194	1360555	68.11	5553	55.81	1.7	0
SGB0436	RS-A027_bin28.metabat2	Bacteria	Dormibacterota	Dormibacteria	UBA8260	UBA8260	Unassign	Unassign	392	25160	2148527	71.64	5781	62.81	0.93	0
SGB0437	RS-A027_bin37.metabat2	Bacteria	Eremiobacterota	Eremiobacteria	Baltobacterales	Baltobacteraceae	Cybelea	Unassign	317	24250	1546067	61.68	5064	71.11	1.39	0
SGB0438	RS-A027_bin48.metabat2	Bacteria	Proteobacteria	Gammaproteobacteria	Burkholderiales	Burkholderiaceae	Paraburkholderia	Unassign	950	22185	4392897	63.35	4756	67.36	1.91	0
SGB0439	RS-A027_bin51.metabat2	Bacteria	Actinobacteriota	Actinomycetia	Actinomycetales	Microbacteriaceae	Microbacterium	Microbacterium testaceum_E	288	53762	3047544	71	14005	93.9	1.89	2
SGB0440	RS-A027_bin58.metabat2	Bacteria	Proteobacteria	Alphaproteobacteria	Rhizobiales	Beijerinckiaceae	Methylocella	Unassign	300	14116	1436577	59.46	5189	57.46	1.67	0
SGB0441	RS-A027_bin66.metabat2	Bacteria	Actinobacteriota	Thermoleophilia	Solirubrobacterales	Solirubrobacteraceae	Palsa-465	Unassign	516	50598	4161123	69.69	10574	75.8	6.84	4
SGB0442	RS-A027_bin70.metabat2	Bacteria	Acidobacteriota	Vicinamibacteria	Vicinamibacterales	2-12-FULL-66-21	Unassign	Unassign	261	303297	7205214	64.54	51141	96.68	8.81	0
SGB0443	RS-A027_bin8.metabat2	Bacteria	Proteobacteria	Gammaproteobacteria	Burkholderiales	Burkholderiaceae	Limnobacter	Limnobacter sp001601825	174	90231	2924045	52.65	24918	94.11	0.85	8
SGB0444	RS-A027_bin81.metabat2	Bacteria	Proteobacteria	Gammaproteobacteria	Enterobacterales	Enterobacteriaceae	BIGb0383	Unassign	135	204162	4523803	55.89	57545	52.93	0	22
SGB0445	RS-A027_bins120.concoct	Bacteria	Dormibacterota	Dormibacteria	Dormibacterales	Dormibacteraceae	CF-161	Unassign	696	43096	6456331	72.35	10924	70.19	3.7	130
SGB0446	RS-A027_bins21.concoct	Bacteria	Actinobacteriota	Actinomycetia	Streptosporangiales	Streptosporangiaceae	UBA9676	Unassign	318	46651	3353741	71.42	12530	70.53	1.87	2
SGB0447	RS-A027_bins46.concoct	Bacteria	Desulfobacterota_B	Binatia	Binatales	Binataceae	JAFAHS01	Unassign	428	14070	1847721	61.77	4716	55.43	1.29	0
SGB0448	RS-A027_bins51.concoct	Bacteria	Proteobacteria	Alphaproteobacteria	Acetobacterales	Acetobacteraceae	Palsa-883	Unassign	1070	17663	4004406	64.16	3920	54.78	1.72	0
SGB0449	RS-A029.bins017.maxbin	Bacteria	Proteobacteria	Alphaproteobacteria	Rhizobiales	Rhizobiaceae	Rhizobium	Rhizobium paranaense	162	322418	5245406	60	135613	97.27	3.58	1
SGB0450	RS-A029_bin11.metabat2	Bacteria	Proteobacteria	Gammaproteobacteria	Enterobacterales	Alteromonadaceae	Pararheinheimera	Pararheinheimera tangshanensis	63	275033	3697384	46.67	97834	72.41	0	0
SGB0451	RS-A029_bin44.metabat2	Bacteria	Proteobacteria	Gammaproteobacteria	Burkholderiales	Burkholderiaceae	Comamonas	Comamonas aquatica	322	65715	3084543	66.03	12430	87.28	1.34	0
SGB0452	RS-A029_bins2.concoct	Bacteria	Proteobacteria	Gammaproteobacteria	Enterobacterales	Enterobacteriaceae	Erwinia	Unassign	147	178436	5655933	56.37	63865	77.74	3.45	6
SGB0453	RS-A029_bins55.concoct	Bacteria	Proteobacteria	Gammaproteobacteria	Pseudomonadales	Pseudomonadaceae	Pseudomonas_E	Pseudomonas_E sediminis	296	78832	4185646	62.39	20394	64.83	1.72	5
SGB0454	RS-A030.bins011.maxbin	Bacteria	Proteobacteria	Gammaproteobacteria	Pseudomonadales	Moraxellaceae	Acinetobacter	Unassign	888	52602	3414126	38.74	3958	50.86	1.72	0
SGB0455	RS-A030.bins056.maxbin	Bacteria	Actinobacteriota	Thermoleophilia	Solirubrobacterales	Solirubrobacteraceae	Unassign	Unassign	462	12284	1486192	72.26	3157	51.03	2.59	0
SGB0456	RS-A030.bins104.maxbin	Bacteria	Verrucomicrobiota	Verrucomicrobiae	Chthoniobacterales	UBA10450	AV40	Unassign	354	10657	1248488	55.96	3643	55.65	3.58	0
SGB0457	RS-A030_bin32.metabat2	Bacteria	Acidobacteriota	Blastocatellia	Pyrinomonadales	Pyrinomonadaceae	PSRF01	Unassign	591	57320	6754397	53.91	14520	89.19	5.13	63
SGB0458	RS-A030_bin34.metabat2	Bacteria	Patescibacteria	Saccharimonadia	Saccharimonadales	UBA4665	RGVC01	Unassign	28	61428	678568	52.42	34866	64.03	0.5	0
SGB0459	RS-A030_bin50.metabat2	Bacteria	Acidobacteriota	Acidobacteriae	Acidobacteriales	SbA1	Gp1-AA133	Unassign	581	88964	6294473	57.22	15326	97.81	2.52	2
SGB0460	RS-A030_bin51.metabat2	Bacteria	Actinobacteriota	Actinomycetia	Mycobacteriales	Mycobacteriaceae	Aldersonia	Unassign	595	26041	3040441	65.53	5291	60.4	1.92	5
SGB0461	RS-A030_bin74.metabat2	Bacteria	Actinobacteriota	Thermoleophilia	Solirubrobacterales	1970-09-01	Unassign	Unassign	295	46885	2058659	70.17	8208	71.88	3.16	0
SGB0462	RS-A030_bin8.metabat2	Bacteria	Proteobacteria	Gammaproteobacteria	Pseudomonadales	Moraxellaceae	Acinetobacter	Acinetobacter johnsonii	95	123445	2977639	41.78	47257	94.16	0.09	14
SGB0463	RS-A030_bin80.metabat2	Bacteria	Actinobacteriota	Thermoleophilia	Solirubrobacterales	1970-09-01	VAYN01	Unassign	326	67210	3501653	69.21	14278	85.19	5.32	0
SGB0464	RS-A030_bin9.metabat2	Bacteria	Acidobacteriota	Acidobacteriae	Acidoferrales	UBA7541	Acidoferrum	Unassign	750	31104	4254524	57.4	6126	66.61	1.99	0
SGB0465	RS-A030_bins13.concoct	Bacteria	Gemmatimonadota	Gemmatimonadetes	Gemmatimonadales	GWC2-71-9	JACDDX01	Unassign	494	16562	2285029	69.75	4855	66.88	0.55	0
SGB0466	RS-A030_bins15.concoct	Bacteria	Acidobacteriota	Thermoanaerobaculia	UBA5704	UBA5704	Unassign	Unassign	856	28696	6258337	68.1	8715	72.6	6.96	33
SGB0467	RS-A030_bins20.concoct	Bacteria	Proteobacteria	Gammaproteobacteria	Pseudomonadales	Pseudomonadaceae	Pseudomonas_E	Pseudomonas_E kribbensis	664	16499	2467648	61.06	3840	50.74	1.88	0
SGB0468	RS-A030_bins6.concoct	Bacteria	Actinobacteriota	Acidimicrobiia	Acidimicrobiales	Ilumatobacteraceae	JAENVT01	Unassign	503	29855	2832942	66.74	5974	57.96	1.24	0
SGB0469	RS-A030_bins80.concoct	Bacteria	Proteobacteria	Alphaproteobacteria	Sphingomonadales	Sphingomonadaceae	Novosphingobium	Unassign	208	85701	2903227	61.63	20024	95.85	0.17	3
SGB0470	RS-A031_bin16.metabat2	Bacteria	Proteobacteria	Gammaproteobacteria	Pseudomonadales	Moraxellaceae	Acinetobacter	Unassign	574	27319	3461569	40.96	6617	58.62	1.72	3
SGB0471	RS-A031_bin20.metabat2	Bacteria	Proteobacteria	Alphaproteobacteria	Sphingomonadales	Sphingomonadaceae	Unassign	Unassign	86	208928	3092432	61.38	92091	97.51	3.17	3
SGB0472	RS-A031_bin39.metabat2	Bacteria	Proteobacteria	Alphaproteobacteria	Sphingomonadales	Sphingomonadaceae	Unassign	Unassign	404	38761	2675549	62.38	7681	71.84	0.38	0
SGB0473	RS-A031_bin46.metabat2	Bacteria	Proteobacteria	Gammaproteobacteria	Burkholderiales	Burkholderiaceae	Variovorax	Variovorax gossypii	938	35003	5780864	68.04	7188	76.49	1.72	5
SGB0474	RS-A031_bins16.concoct	Bacteria	Verrucomicrobiota	Verrucomicrobiae	Chthoniobacterales	UBA10450	Udaeobacter	Unassign	639	12994	2331137	54.77	3885	59.22	2.25	0
SGB0475	RS-A032_bin1.metabat2	Bacteria	Actinobacteriota	Actinomycetia	Nanopelagicales	CAIYMF01	JAFIHG01	Unassign	284	61528	3074674	72.13	14078	93.01	5.59	5
SGB0476	RS-A032_bin24.metabat2	Bacteria	Patescibacteria	Saccharimonadia	Saccharimonadales	JACDFO01	JACDFO01	Unassign	104	21121	826721	56.2	9799	51.75	0	0
SGB0477	RS-A032_bin4.metabat2	Bacteria	Proteobacteria	Gammaproteobacteria	Burkholderiales	Burkholderiaceae	Rubrivivax	Unassign	588	43135	4746915	70.56	9678	87.89	1.38	0
SGB0478	RS-A032_bin9.metabat2	Bacteria	Actinobacteriota	Actinomycetia	Mycobacteriales	Unassign	Unassign	Unassign	607	72796	5552971	73.14	12136	84.87	3.14	3
SGB0479	RS-A032_bins38.concoct	Bacteria	Proteobacteria	Alphaproteobacteria	Rhizobiales	Xanthobacteraceae	P52-10	Unassign	233	80165	3567090	65.2	19590	61.32	0	0
SGB0480	RS-A032_bins43.concoct	Bacteria	Actinobacteriota	Thermoleophilia	Solirubrobacterales	1970-09-01	VAYN01	Unassign	667	18160	2322765	68.88	3628	51.62	2.16	0
SGB0481	RS-A033_bin10.metabat2	Bacteria	Proteobacteria	Gammaproteobacteria	Burkholderiales	Burkholderiaceae	Albitalea	Unassign	359	131051	6309279	63.61	29764	99.38	2.49	62
SGB0482	RS-A033_bin11.metabat2	Bacteria	Proteobacteria	Alphaproteobacteria	Sphingomonadales	Sphingomonadaceae	Unassign	Unassign	99	219139	3332179	61.12	70316	94.85	5.28	6
SGB0483	RS-A033_bin20.metabat2	Bacteria	Proteobacteria	Alphaproteobacteria	Sphingomonadales	Sphingomonadaceae	Novosphingobium	Unassign	611	60374	4421075	65.53	8498	83.73	4.03	0
SGB0484	RS-A033_bins5.concoct	Bacteria	Proteobacteria	Alphaproteobacteria	Sphingomonadales	Sphingomonadaceae	Sphingobium	Unassign	110	153152	3435455	63.86	53190	96.06	0.87	10
SGB0485	RS-A034.bins001.maxbin	Bacteria	Proteobacteria	Gammaproteobacteria	Pseudomonadales	Pseudomonadaceae	Pseudomonas_E	Pseudomonas_E asiatica	591	50348	2492756	63.04	4430	50.02	1.7	0
SGB0486	RS-A034.bins031.maxbin	Bacteria	Proteobacteria	Gammaproteobacteria	Pseudomonadales	Moraxellaceae	Acinetobacter	Acinetobacter bereziniae_A	515	71143	4235965	38.03	14963	81.22	7.58	0
SGB0487	RS-A034_bin20.metabat2	Bacteria	Actinobacteriota	Actinomycetia	Mycobacteriales	Mycobacteriaceae	Nocardia	Unassign	537	74544	6483150	67.52	16492	97.31	2.84	88
SGB0488	RS-A034_bin49.metabat2	Bacteria	Dependentiae	Babeliae	Babeliales	Vermiphilaceae	SOIL31	Unassign	157	27106	958293	33.65	6646	54.09	2.69	0
SGB0489	RS-A034_bins18.concoct	Bacteria	Proteobacteria	Alphaproteobacteria	Sphingomonadales	Sphingomonadaceae	Tardibacter	Unassign	548	17328	2306691	61.25	4586	51.46	0.34	0
SGB0490	RS-A034_bins21.concoct	Bacteria	Actinobacteriota	Thermoleophilia	Solirubrobacterales	Solirubrobacteraceae	Unassign	Unassign	366	11960	1362554	70.78	3908	50.25	3.85	0
SGB0491	RS-A034_bins49.concoct	Bacteria	Proteobacteria	Gammaproteobacteria	Pseudomonadales	Moraxellaceae	Acinetobacter	Acinetobacter dispersus	96	224910	3869870	40.62	74012	98.32	2.13	10
SGB0492	RS-A035_bin18.metabat2	Bacteria	Proteobacteria	Alphaproteobacteria	Rhizobiales	Methyloligellaceae	Methyloceanibacter	Unassign	216	23586	1557760	65.83	9333	77.55	2.07	0
SGB0493	RS-A035_bins11.concoct	Bacteria	Planctomycetota	Planctomycetia	Pirellulales	Pirellulaceae	SXOA01	Unassign	646	49979	6327641	62.18	12698	73.46	0	0
SGB0494	RS-A035_bins14.concoct	Bacteria	Actinobacteriota	Thermoleophilia	Solirubrobacterales	1970-09-01	Unassign	Unassign	367	30336	2798690	70.15	9188	72.99	2.59	0
SGB0495	RS-A035_bins27.concoct	Bacteria	Proteobacteria	Alphaproteobacteria	Micropepsales	Micropepsaceae	Unassign	Unassign	236	142807	3956797	63.34	28516	98.59	3.19	2
SGB0496	RS-A036_bin19.metabat2	Bacteria	Proteobacteria	Alphaproteobacteria	Rhizobiales	Methyloligellaceae	Methyloceanibacter	Unassign	132	39161	1065874	62.36	10059	50.56	0.93	0
SGB0497	RS-A036_bin21.metabat2	Bacteria	Dormibacterota	Dormibacteria	Dormibacterales	Dormibacteraceae	CF-161	Unassign	909	14952	3647726	66.73	3976	63.3	2.78	1
SGB0498	RS-A036_bins1.concoct	Bacteria	Myxococcota	Polyangia	Haliangiales	Haliangiaceae	JABFXX01	Unassign	1339	33426	9788577	68.9	8291	63.24	3.51	4
SGB0499	RS-A036_bins2.concoct	Bacteria	Proteobacteria	Gammaproteobacteria	Pseudomonadales	Spongiibacteraceae	Unassign	Unassign	742	17120	2617725	56	3778	62.25	1.92	0
SGB0500	RS-A036_bins22.concoct	Bacteria	Actinobacteriota	Actinomycetia	Mycobacteriales	Mycobacteriaceae	Mycobacterium	Unassign	884	19365	2916613	68.13	3338	53.3	4.88	0
SGB0501	RS-A036_bins46.concoct	Bacteria	Actinobacteriota	Thermoleophilia	Solirubrobacterales	1970-09-01	VAYN01	Unassign	348	58484	3781358	69.34	15246	86.06	2.16	0
SGB0502	RS-A036_bins72.concoct	Bacteria	Proteobacteria	Gammaproteobacteria	Steroidobacterales	Steroidobacteraceae	FEN-1191	Unassign	296	58694	2704808	69.26	11501	87.29	2.9	0
SGB0503	RS-A037_bin17.metabat2	Bacteria	Acidobacteriota	Acidobacteriae	Acidoferrales	UBA7541	Acidoferrum	Unassign	547	26191	2871024	59.47	5580	61.21	1.72	0
SGB0504	RS-A037_bin20.metabat2	Bacteria	Proteobacteria	Alphaproteobacteria	Caulobacterales	Caulobacteraceae	Phenylobacterium	Unassign	680	49271	4521908	70.68	7807	80.48	4.76	0
SGB0505	RS-A037_bin26.metabat2	Bacteria	Proteobacteria	Gammaproteobacteria	Burkholderiales	Burkholderiaceae	Paraburkholderia	Unassign	1248	53312	6619037	61.94	5579	65.28	3.39	0
SGB0506	RS-A037_bin31.metabat2	Bacteria	Chloroflexota	Ktedonobacteria	Ktedonobacterales	Ktedonobacteraceae	Unassign	Unassign	149	179608	4825571	47.63	48154	98.68	2.31	24
SGB0507	RS-A037_bin35.metabat2	Bacteria	Verrucomicrobiota	Verrucomicrobiae	Opitutales	Opitutaceae	EW11	Unassign	568	61666	7117838	57.68	17714	98.63	3.66	1
SGB0508	RS-A037_bin6.metabat2	Bacteria	Acidobacteriota	Blastocatellia	Pyrinomonadales	Pyrinomonadaceae	PSRF01	Unassign	187	281856	7258322	55.43	67976	97.44	1.71	123
SGB0509	RS-A037_bins15.concoct	Bacteria	Proteobacteria	Gammaproteobacteria	Steroidobacterales	Steroidobacteraceae	13-2-20CM-66-19	Unassign	1103	26431	6280129	60.78	6485	59.64	1.72	1
SGB0510	RS-A037_bins17.concoct	Bacteria	Proteobacteria	Alphaproteobacteria	Caulobacterales	TH1-2	Terricaulis	Unassign	362	141888	4066426	62.83	14819	83.39	4.39	0
SGB0511	RS-A037_bins36.concoct	Bacteria	Actinobacteriota	Actinomycetia	Mycobacteriales	Frankiaceae	Frankia	Unassign	724	80499	5696662	71.91	9049	78.43	1.1	120
SGB0512	RS-A038.bins009.maxbin	Bacteria	Proteobacteria	Alphaproteobacteria	Rhizobiales	Rhizobiaceae	Agrobacterium	Unassign	59	362859	4092625	55.46	138744	57.2	1.64	0
SGB0513	RS-A038.bins041.maxbin	Bacteria	Actinobacteriota	Actinomycetia	Actinomycetales	Micrococcaceae	Paenarthrobacter	Unassign	363	86715	4208695	63.47	17510	60.06	1.72	32
SGB0514	RS-A038.bins055.maxbin	Bacteria	Bacteroidota	Bacteroidia	Chitinophagales	Chitinophagaceae	Ferruginibacter	Unassign	51	518435	4259915	42.08	281191	99.01	0.74	1
SGB0515	RS-A038.bins105.maxbin	Bacteria	Chloroflexota	Limnocylindria	Limnocylindrales	CSP1-4	CSP1-4	Unassign	466	24126	2170587	71.32	5475	56.22	3.99	0
SGB0516	RS-A038.bins136.maxbin	Bacteria	Actinobacteriota	Acidimicrobiia	UBA5794	ZC4RG35	SZUA-217	Unassign	323	27919	1841400	62.03	6840	56.8	3.85	0
SGB0517	RS-A038.bins143.maxbin	Bacteria	Planctomycetota	Planctomycetia	Pirellulales	Pirellulaceae	SXOA01	Unassign	968	18611	4056296	62.48	4591	57.1	1.15	0
SGB0518	RS-A038.bins150.maxbin	Bacteria	Bacteroidota	Bacteroidia	Cytophagales	Cyclobacteriaceae	Chryseolinea	Unassign	734	67129	4327798	44.32	7227	65.89	3.85	0
SGB0519	RS-A038.bins352.maxbin	Bacteria	Planctomycetota	Planctomycetia	Pirellulales	Pirellulaceae	Unassign	Unassign	1049	8898	3309905	62.41	3229	53.36	1.15	0
SGB0520	RS-A038_bin10.metabat2	Bacteria	Proteobacteria	Alphaproteobacteria	Sphingomonadales	Sphingomonadaceae	Rhizorhapis	Unassign	25	492557	2799809	58	155397	97.51	0.99	0
SGB0521	RS-A038_bin112.metabat2	Bacteria	Planctomycetota	Planctomycetia	Gemmatales	Gemmataceae	SIAJ01	Unassign	918	22800	5126813	59.23	6037	65.3	2.38	0
SGB0522	RS-A038_bin120.metabat2	Bacteria	Verrucomicrobiota	Verrucomicrobiae	Verrucomicrobiales	Akkermansiaceae	Haloferula	Unassign	290	149717	6566193	62.93	33426	93.21	2.99	0
SGB0523	RS-A038_bin122.metabat2	Bacteria	Proteobacteria	Alphaproteobacteria	Sphingomonadales	Sphingomonadaceae	Sphingobium	Unassign	415	66663	3812098	61.53	12901	75.91	4.61	0
SGB0524	RS-A038_bin130.metabat2	Bacteria	Proteobacteria	Alphaproteobacteria	Rhizobiales	Devosiaceae	Devosia	Unassign	481	172407	4354988	61.93	10830	73.1	1.68	0
SGB0525	RS-A038_bin131.metabat2	Bacteria	Proteobacteria	Alphaproteobacteria	Rhizobiales	Rhizobiaceae	Agrobacterium	Agrobacterium tumefaciens_I	82	378180	4854816	60.14	91515	90.16	5.09	8
SGB0526	RS-A038_bin134.metabat2	Bacteria	Actinobacteriota	Acidimicrobiia	UBA5794	ZC4RG35	SZUA-217	Unassign	157	53988	1858119	66.6	17570	56.22	0	0
SGB0527	RS-A038_bin136.metabat2	Bacteria	Acidobacteriota	Thermoanaerobaculia	Gp7-AA8	Gp7-AA8	QHVT01	Unassign	732	17182	3179374	62.8	4441	55.33	3.45	0
SGB0528	RS-A038_bin138.metabat2	Bacteria	Bacteroidota	Bacteroidia	Chitinophagales	Chitinophagaceae	Unassign	Unassign	413	48956	4398796	43.02	13456	93.46	1.99	11
SGB0529	RS-A038_bin14.metabat2	Bacteria	Bacteroidota	Bacteroidia	Chitinophagales	Chitinophagaceae	Edaphocola	Unassign	387	53284	3436898	51.77	10284	53.21	1.72	1
SGB0530	RS-A038_bin15.metabat2	Bacteria	Proteobacteria	Gammaproteobacteria	Pseudomonadales	Pseudomonadaceae	Pseudomonas_E	Pseudomonas_E sp014851865	289	72649	4319286	63.65	24506	58.26	1.72	64
SGB0531	RS-A038_bin151.metabat2	Bacteria	Acidobacteriota	Thermoanaerobaculia	UBA5704	Unassign	Unassign	Unassign	598	67988	4772470	68.83	9847	60.52	0	0
SGB0532	RS-A038_bin172.metabat2	Bacteria	Bacteroidota	Bacteroidia	Chitinophagales	Chitinophagaceae	Chitinophaga	Chitinophaga sp018224885	67	628072	7859778	46.31	200449	99.51	0.49	13
SGB0533	RS-A038_bin19.metabat2	Bacteria	Proteobacteria	Gammaproteobacteria	Burkholderiales	Burkholderiaceae	Achromobacter	Unassign	519	58505	5517903	66.46	13971	93.89	1.03	21
SGB0534	RS-A038_bin191.metabat2	Bacteria	Actinobacteriota	Actinomycetia	Actinomycetales	Microbacteriaceae	Microbacterium	Unassign	236	64817	3055362	69.52	18606	85.4	9	16
SGB0535	RS-A038_bin193.metabat2	Bacteria	Proteobacteria	Gammaproteobacteria	Burkholderiales	Casimicrobiaceae	VBCG01	Unassign	485	32067	3125460	70.54	7481	66.55	0	0
SGB0536	RS-A038_bin194.metabat2	Bacteria	Acidobacteriota	Acidobacteriae	Bryobacterales	Bryobacteraceae	JAFLBB01	Unassign	768	26975	3822995	61.31	5130	51.14	0.92	0
SGB0537	RS-A038_bin199.metabat2	Bacteria	Proteobacteria	Alphaproteobacteria	Sphingomonadales	Sphingomonadaceae	Sphingomonas_E	Unassign	129	235416	4850199	66.45	58187	96.09	1.51	7
SGB0538	RS-A038_bin202.metabat2	Bacteria	Proteobacteria	Gammaproteobacteria	Xanthomonadales	Rhodanobacteraceae	Tahibacter	Unassign	875	23447	4669908	67.37	5754	63.79	0	1
SGB0539	RS-A038_bin204.metabat2	Bacteria	Proteobacteria	Alphaproteobacteria	Caulobacterales	TH1-2	Terricaulis	Unassign	345	52367	2925757	64.29	10163	85.45	1.1	3
SGB0540	RS-A038_bin208.metabat2	Bacteria	Proteobacteria	Gammaproteobacteria	Burkholderiales	Burkholderiaceae	Cupriavidus	Unassign	189	119651	6803674	65.1	51617	96.52	1.08	1
SGB0541	RS-A038_bin210.metabat2	Bacteria	Actinobacteriota	Acidimicrobiia	UBA5794	ZC4RG35	SZUA-217	Unassign	296	37031	2366486	62.56	10076	75.9	3.85	0
SGB0542	RS-A038_bin212.metabat2	Bacteria	Acidobacteriota	Vicinamibacteria	Vicinamibacterales	UBA2999	CADEFD01	Unassign	586	34790	2987219	70.36	5386	63.79	3.45	0
SGB0543	RS-A038_bin218.metabat2	Bacteria	Acidobacteriota	Vicinamibacteria	Vicinamibacterales	Vicinamibacteraceae	Unassign	Unassign	861	39905	5818079	71.39	8154	69.57	1.71	0
SGB0544	RS-A038_bin221.metabat2	Bacteria	Desulfobacterota_B	Binatia	UBA9968	UBA9968	DP-20	Unassign	408	137823	6937969	56.69	29929	98.04	2.9	58
SGB0545	RS-A038_bin225.metabat2	Bacteria	Proteobacteria	Gammaproteobacteria	Pseudomonadales	Pseudomonadaceae	Pseudomonas_E	Pseudomonas_E rhodesiae	189	289521	5326684	60.77	43902	57.02	3.51	45
SGB0546	RS-A038_bin235.metabat2	Bacteria	Methylomirabilota	Methylomirabilia	Rokubacteriales	CSP1-6	JACQFL01	Unassign	872	26342	5194944	71.59	6766	75.52	6.72	0
SGB0547	RS-A038_bin238.metabat2	Bacteria	Proteobacteria	Alphaproteobacteria	Sphingomonadales	Sphingomonadaceae	Novosphingobium	Unassign	270	49495	2665855	65.25	12588	86.16	3.11	4
SGB0548	RS-A038_bin243.metabat2	Bacteria	Bacteroidota	Bacteroidia	Flavobacteriales	Flavobacteriaceae	Flavobacterium	Unassign	154	165167	3822841	35.97	46369	96.85	5.1	4
SGB0549	RS-A038_bin244.metabat2	Bacteria	Acidobacteriota	Vicinamibacteria	Vicinamibacterales	UBA2999	Gp6-AA40	Unassign	356	136067	6232536	63.47	26066	85.97	8.98	0
SGB0550	RS-A038_bin245.metabat2	Bacteria	Proteobacteria	Alphaproteobacteria	Sphingomonadales	Sphingomonadaceae	Unassign	Unassign	280	25957	1803569	67.74	7825	66.61	2.19	0
SGB0551	RS-A038_bin246.metabat2	Bacteria	Patescibacteria	Saccharimonadia	Saccharimonadales	UBA4665	Unassign	Unassign	4	484018	1180902	45.67	408757	69.31	0	0
SGB0552	RS-A038_bin28.metabat2	Bacteria	Actinobacteriota	Actinomycetia	Actinomycetales	Micrococcaceae	Arthrobacter_I	Unassign	507	37285	3326637	68.47	7530	51.59	0	2
SGB0553	RS-A038_bin29.metabat2	Bacteria	Proteobacteria	Alphaproteobacteria	Dongiales	Dongiaceae	Unassign	Unassign	508	34670	3645845	64.46	8683	58.87	0	0
SGB0554	RS-A038_bin35.metabat2	Bacteria	Bacteroidota	Bacteroidia	Cytophagales	Spirosomaceae	Dyadobacter	Unassign	592	99233	6340047	49.98	13915	57.92	3.45	4
SGB0555	RS-A038_bin42.metabat2	Bacteria	Bacteroidota	Bacteroidia	Chitinophagales	Chitinophagaceae	UBA1312	Unassign	31	521667	3252991	48.92	254500	99.51	1.48	0
SGB0556	RS-A038_bin52.metabat2	Bacteria	Actinobacteriota	Actinomycetia	Actinomycetales	Microbacteriaceae	Pseudolysinimonas	Unassign	225	35210	2073917	68.89	13768	80.4	6.71	4
SGB0557	RS-A038_bin53.metabat2	Bacteria	Planctomycetota	Phycisphaerae	Tepidisphaerales	Tepidisphaeraceae	UBA2421	Unassign	854	18879	4047543	60.45	4944	51.52	4.39	0
SGB0558	RS-A038_bin62.metabat2	Bacteria	Proteobacteria	Alphaproteobacteria	Rhizobiales	Xanthobacteraceae	Pseudolabrys	Unassign	303	34758	1597592	60.97	5734	50.86	1.72	0
SGB0559	RS-A038_bin63.metabat2	Bacteria	Verrucomicrobiota	Verrucomicrobiae	Verrucomicrobiales	Verrucomicrobiaceae	Verrucomicrobium	Unassign	738	23722	4062545	61.74	5878	50.86	1.72	0
SGB0560	RS-A038_bin65.metabat2	Bacteria	Planctomycetota	UBA8108	UBA8108	SXIK01	Unassign	Unassign	1020	28517	5986887	68.45	6493	68.31	2.27	0
SGB0561	RS-A038_bin66.metabat2	Bacteria	Bacteroidota	Bacteroidia	Flavobacteriales	Flavobacteriaceae	Flavobacterium	Unassign	340	54328	2044768	37.14	6953	61.23	1.27	0
SGB0562	RS-A038_bin7.metabat2	Bacteria	Proteobacteria	Alphaproteobacteria	Rhizobiales	Xanthobacteraceae	Z2-YC6860	Unassign	715	55308	6688248	65.63	12445	69.31	0	0
SGB0563	RS-A038_bin77.metabat2	Bacteria	Firmicutes	Bacilli	Bacillales	Bacillaceae_G	Bacillus_A	Bacillus_A cereus_S	566	25256	3091152	36.2	5978	52.14	1.79	0
SGB0564	RS-A038_bin8.metabat2	Bacteria	Chloroflexota	Anaerolineae	Thermoflexales	J036	Unassign	Unassign	604	34815	3546505	60.6	6393	67.63	1.36	0
SGB0565	RS-A038_bin80.metabat2	Bacteria	Bacteroidota	Bacteroidia	Flavobacteriales	Flavobacteriaceae	Flavobacterium	Unassign	319	39915	2344624	34	8823	62.07	0	1
SGB0566	RS-A038_bin83.metabat2	Bacteria	Proteobacteria	Alphaproteobacteria	Rhizobiales	Methyloligellaceae	Methyloceanibacter	Unassign	250	35429	1808143	63.85	9423	75.75	4.23	0
SGB0567	RS-A038_bin86.metabat2	Bacteria	Planctomycetota	Planctomycetia	Pirellulales	Pirellulaceae	Unassign	Unassign	992	23981	5619787	58.38	6164	62.39	0	1
SGB0568	RS-A038_bin87.metabat2	Bacteria	Bacteroidota	UBA10030	UBA10030	Unassign	Unassign	Unassign	277	19977	1762123	53.56	6443	64.65	4.66	0
SGB0569	RS-A038_bin9.metabat2	Bacteria	Verrucomicrobiota	Verrucomicrobiae	Verrucomicrobiales	Akkermansiaceae	Luteolibacter	Unassign	132	286087	5811248	61.84	71236	96.64	1.36	1
SGB0570	RS-A038_bin92.metabat2	Bacteria	Acidobacteriota	Acidobacteriae	Bryobacterales	Bryobacteraceae	JAFLBB01	Unassign	726	34793	5197563	59.13	8404	76.29	5.56	0
SGB0571	RS-A038_bin93.metabat2	Bacteria	Chloroflexota	Limnocylindria	Limnocylindrales	CSP1-4	JAFMJV01	Unassign	320	37022	2690653	70.12	10808	78.19	4.63	9
SGB0572	RS-A038_bin96.metabat2	Bacteria	Acidobacteriota	Blastocatellia	Pyrinomonadales	Pyrinomonadaceae	Unassign	Unassign	268	77829	4771276	53.52	23890	89.46	2.71	0
SGB0573	RS-A038_bin98.metabat2	Bacteria	Acidobacteriota	Thermoanaerobaculia	UBA5704	Unassign	Unassign	Unassign	791	33343	4472276	68.48	6343	53.29	1	0
SGB0574	RS-A038_bins141.concoct	Bacteria	Proteobacteria	Gammaproteobacteria	Burkholderiales	Burkholderiaceae	Unassign	Unassign	348	38078	3458355	66.1	11801	67.24	3.45	0
SGB0575	RS-A038_bins149.concoct	Bacteria	Proteobacteria	Alphaproteobacteria	Rhizobiales	Rhizobiaceae	Neorhizobium	Neorhizobium sp900471605	146	175997	5287347	62.49	60268	68.79	1.72	10
SGB0576	RS-A038_bins156.concoct	Bacteria	Acidobacteriota	Vicinamibacteria	Bin61	SMYC01	Unassign	Unassign	957	8872	2908976	65.97	3032	52.48	1.42	0
SGB0577	RS-A038_bins182.concoct	Bacteria	Proteobacteria	Gammaproteobacteria	Burkholderiales	Burkholderiaceae	Acidovorax	Unassign	999	37184	4875254	66.91	5819	50.34	3.45	21
SGB0578	RS-A038_bins184.concoct	Bacteria	Acidobacteriota	Blastocatellia	RBC074	Unassign	Unassign	Unassign	814	10672	2854330	55.62	3640	53.8	1.76	0
SGB0579	RS-A038_bins21.concoct	Bacteria	Actinobacteriota	Acidimicrobiia	IMCC26256	Unassign	Unassign	Unassign	171	108582	3468191	67.67	29468	90.6	1.42	5
SGB0580	RS-A038_bins32.concoct	Bacteria	Chloroflexota	Anaerolineae	Aggregatilineales	A4b	OLB15	Unassign	593	18846	2987099	61.99	5760	59.95	1.82	0
SGB0581	RS-A038_bins39.concoct	Bacteria	Proteobacteria	Gammaproteobacteria	Pseudomonadales	Pseudomonadaceae	Pseudomonas_F	Unassign	272	155733	5564867	65.06	29950	57.93	4.31	3
SGB0582	RS-A038_bins60.concoct	Bacteria	Planctomycetota	Planctomycetia	Pirellulales	PLA5	Unassign	Unassign	765	43729	6082489	61.9	9693	76.51	1.15	2
SGB0583	RS-A038_bins7.concoct	Bacteria	Proteobacteria	Alphaproteobacteria	Caulobacterales	Caulobacteraceae	Brevundimonas	Unassign	221	81102	3272186	69.72	20676	92.47	2.82	0
SGB0584	RS-A038_bins74.concoct	Bacteria	Proteobacteria	Gammaproteobacteria	Burkholderiales	Burkholderiaceae	Variovorax	Unassign	615	89451	7167349	67.77	17555	88.31	6.06	94
SGB0585	RS-A038_bins93.concoct	Bacteria	Proteobacteria	Gammaproteobacteria	Burkholderiales	Burkholderiaceae	Comamonas	Comamonas thiooxydans	718	13193	2530424	62.12	3584	51.99	2.58	0
SGB0586	RS-A039.bins015.maxbin	Bacteria	Proteobacteria	Alphaproteobacteria	Sphingomonadales	Sphingomonadaceae	Croceibacterium	Unassign	260	101246	2438024	63.82	28092	78.3	5.14	0
SGB0587	RS-A039.bins020.maxbin	Bacteria	Actinobacteriota	Thermoleophilia	Solirubrobacterales	Solirubrobacteraceae	Palsa-465	Unassign	443	58066	4715964	70.09	15822	86.58	7.05	3
SGB0588	RS-A039_bin14.metabat2	Bacteria	Actinobacteriota	Thermoleophilia	Solirubrobacterales	1970-09-01	VAYN01	Unassign	497	61555	3242207	69.58	7747	56.38	3.45	0
SGB0589	RS-A039_bin16.metabat2	Bacteria	Acidobacteriota	Acidobacteriae	Bryobacterales	Bryobacteraceae	Unassign	Unassign	275	124371	5670308	58.83	35383	97.39	2.66	1
SGB0590	RS-A039_bin3.metabat2	Bacteria	Proteobacteria	Gammaproteobacteria	Enterobacterales	Aeromonadaceae	Aeromonas	Aeromonas caviae	422	75040	3650605	62.34	10330	87.31	1.66	0
SGB0591	RS-A039_bin40.metabat2	Bacteria	Proteobacteria	Gammaproteobacteria	Steroidobacterales	Steroidobacteraceae	13-2-20CM-66-19	Unassign	192	211263	5720549	62.07	51614	93.3	5.8	45
SGB0592	RS-A039_bin47.metabat2	Bacteria	Proteobacteria	Gammaproteobacteria	Steroidobacterales	Steroidobacteraceae	CAILZL01	Unassign	94	198320	4351952	55.99	74591	96.74	3.05	5
SGB0593	RS-A039_bin48.metabat2	Bacteria	Acidobacteriota	Vicinamibacteria	Vicinamibacterales	UBA2999	Unassign	Unassign	46	393912	4638021	62.07	216070	96.3	7.69	11
SGB0594	RS-A039_bin6.metabat2	Bacteria	Actinobacteriota	Thermoleophilia	Solirubrobacterales	1970-09-01	VAYN01	Unassign	476	122588	3935533	69.6	10754	68.64	4.31	0
SGB0595	RS-A040_bins36.concoct	Bacteria	Acidobacteriota	Acidobacteriae	Bryobacterales	Bryobacteraceae	Unassign	Unassign	1284	21423	6071110	60.12	5126	71.85	0	0
SGB0596	RS-A040_bins7.concoct	Bacteria	Actinobacteriota	Acidimicrobiia	Acidimicrobiales	QHCF01	AC-9	Unassign	613	28285	3796732	67.18	7433	75.36	8.52	2
SGB0597	RS-A041.bins004.maxbin	Bacteria	Proteobacteria	Gammaproteobacteria	Pseudomonadales	Moraxellaceae	Acinetobacter	Acinetobacter johnsonii	664	72492	3861597	41.84	7057	84.92	9.09	4
SGB0598	RS-A041.bins007.maxbin	Bacteria	Patescibacteria	Paceibacteria	UBA9983_A	VMEP01	Unassign	Unassign	163	36429	698035	34.45	4356	50.82	2.18	0
SGB0599	RS-A041_bin13.metabat2	Bacteria	Proteobacteria	Alphaproteobacteria	Rhodospirillales	Rhodospirillaceae	Unassign	Unassign	188	61465	3051573	61.19	24605	93.83	1.74	1
SGB0600	RS-A041_bin16.metabat2	Bacteria	Proteobacteria	Alphaproteobacteria	Rhodospirillales	Rhodospirillaceae	Unassign	Unassign	76	250648	3349627	61.88	63594	96.73	1.99	2
SGB0601	RS-A041_bin24.metabat2	Bacteria	Actinobacteriota	Thermoleophilia	Solirubrobacterales	Solirubrobacteraceae	Palsa-465	Unassign	115	169463	3200584	68.63	47205	96.7	0	10
SGB0602	RS-A041_bin29.metabat2	Bacteria	Acidobacteriota	Acidobacteriae	Acidoferrales	UBA7541	Acidoferrum	Unassign	574	51080	4600620	55.4	9546	87.52	0.85	0
SGB0603	RS-A041_bin38.metabat2	Bacteria	Proteobacteria	Gammaproteobacteria	Enterobacterales	Enterobacteriaceae	Pantoea	Pantoea rwandensis_B	306	143661	4837070	53.97	24207	94.66	2.27	12
SGB0604	RS-A041_bin48.metabat2	Bacteria	Acidobacteriota	Acidobacteriae	Bryobacterales	Bryobacteraceae	Palsa-187	Unassign	424	23705	2201015	59.07	5691	65.3	2.69	4
SGB0605	RS-A041_bin53.metabat2	Bacteria	Actinobacteriota	Thermoleophilia	Solirubrobacterales	Solirubrobacteraceae	Unassign	Unassign	269	67072	2382096	72.94	10599	82.26	1.71	0
SGB0606	RS-A041_bin7.metabat2	Bacteria	Proteobacteria	Alphaproteobacteria	Sphingomonadales	Sphingomonadaceae	Sphingobium	Unassign	133	98993	3316213	63.11	39221	97.24	1.74	7
SGB0607	RS-A041_bins21.concoct	Bacteria	Acidobacteriota	Vicinamibacteria	Vicinamibacterales	UBA2999	Unassign	Unassign	220	200562	8162147	61.34	59078	92.88	6.15	2
SGB0608	RS-A041_bins29.concoct	Bacteria	Proteobacteria	Alphaproteobacteria	Caulobacterales	TH1-2	Terricaulis	Unassign	553	14413	2064796	61.72	3945	55.49	1.08	0
SGB0609	RS-A041_bins35.concoct	Bacteria	Proteobacteria	Gammaproteobacteria	Steroidobacterales	Steroidobacteraceae	13-2-20CM-66-19	Unassign	155	337526	8710459	61.1	92740	91.31	5.71	29
SGB0610	RS-A042.bins030.maxbin	Bacteria	Proteobacteria	Gammaproteobacteria	Burkholderiales	Burkholderiaceae	JAFEEF01	Unassign	1255	24475	4517383	68.93	3744	70.25	7.68	1
SGB0611	RS-A042_bin16.metabat2	Bacteria	Actinobacteriota	Acidimicrobiia	IMCC26256	PALSA-555	Unassign	Unassign	257	30476	1587331	70.46	7262	72.39	2.48	0
SGB0612	RS-A042_bin25.metabat2	Bacteria	Bacteroidota	Bacteroidia	Chitinophagales	Chitinophagaceae	JJ008	Unassign	553	23356	2970184	44.89	5743	66.97	0.33	0
SGB0613	RS-A042_bin27.metabat2	Bacteria	Planctomycetota	UBA1135	UBA1135	GCA-002686595	Unassign	Unassign	684	23826	3486182	70.74	5527	70.58	1.08	0
SGB0614	RS-A042_bin30.metabat2	Bacteria	Proteobacteria	Alphaproteobacteria	Sphingomonadales	Sphingomonadaceae	Allosphingosinicella	Unassign	720	70542	5535141	63.09	10343	87.79	4.94	1
SGB0615	RS-A042_bin44.metabat2	Bacteria	Gemmatimonadota	Gemmatimonadetes	Gemmatimonadales	GWC2-71-9	JACDDX01	Unassign	588	15339	2782676	69.96	5132	50.78	0	0
SGB0616	RS-A042_bin51.metabat2	Bacteria	Verrucomicrobiota	Verrucomicrobiae	Chthoniobacterales	Terrimicrobiaceae	Unassign	Unassign	260	121328	5048194	58.54	36374	99.24	3.04	5
SGB0617	RS-A042_bin57.metabat2	Bacteria	Acidobacteriota	Vicinamibacteria	Vicinamibacterales	UBA2999	2-12-FULL-65-11	Unassign	168	174766	3985345	63.39	44278	96.77	5.13	0
SGB0618	RS-A042_bin59.metabat2	Bacteria	Acidobacteriota	Acidobacteriae	VXMN01	VXMN01	VFZK01	Unassign	1389	18565	6334765	55.63	4686	71.91	4.79	0
SGB0619	RS-A042_bin63.metabat2	Bacteria	Actinobacteriota	Actinomycetia	Mycobacteriales	Pseudonocardiaceae	Unassign	Unassign	1090	60045	8459479	68.5	9809	93.63	4.17	141
SGB0620	RS-A042_bin7.metabat2	Bacteria	Acidobacteriota	Blastocatellia	Pyrinomonadales	Pyrinomonadaceae	PSRF01	Unassign	896	31758	5719007	56.78	7720	58.42	3.45	17
SGB0621	RS-A042_bin9.metabat2	Bacteria	Proteobacteria	Alphaproteobacteria	Rhodobacterales	Rhodobacteraceae	Paracoccus	Paracoccus marcusii	438	26780	2563335	68.36	6765	79.78	1.2	0
SGB0622	RS-A042_bins20.concoct	Bacteria	Actinobacteriota	Thermoleophilia	Gaiellales	Gaiellaceae	PALSA-600	Unassign	714	26253	3987075	69.64	6509	52.01	0	0
SGB0623	RS-A042_bins35.concoct	Bacteria	Gemmatimonadota	Gemmatimonadetes	Gemmatimonadales	Gemmatimonadaceae	Unassign	Unassign	1390	24344	6767142	64.18	5580	76.1	2.2	0
SGB0624	RS-A042_bins48.concoct	Bacteria	Proteobacteria	Alphaproteobacteria	Sphingomonadales	Sphingomonadaceae	Sphingomonas	Unassign	390	28598	2491325	68.03	7796	80.86	0.88	8
SGB0625	RS-A042_bins55.concoct	Bacteria	Verrucomicrobiota	Verrucomicrobiae	Pedosphaerales	UBA8199	CAIQQM01	Unassign	1028	16562	3616797	56.92	3641	59.56	4.19	0
SGB0626	RS-A042_bins63.concoct	Bacteria	Dependentiae	Babeliae	Babeliales	Vermiphilaceae	SOIL31	Unassign	163	43003	1174241	34.42	10033	51.63	1.02	0
SGB0627	RS-A042_bins65.concoct	Bacteria	Acidobacteriota	Blastocatellia	UBA7656	UBA7656	JADGNW01	Unassign	723	63846	8326557	53.7	14984	90.38	6.98	1
SGB0628	RS-A043.bins004.maxbin	Bacteria	Verrucomicrobiota	Verrucomicrobiae	Chthoniobacterales	Xiphinematobacteraceae	Xiphinematobacter	Unassign	17	695586	1206684	43	695586	92.79	1	0
SGB0629	RS-A043.bins021.maxbin	Bacteria	Actinobacteriota	Acidimicrobiia	IMCC26256	PALSA-555	Unassign	Unassign	109	76105	2015569	70.28	28364	58.62	0	0
SGB0630	RS-A043_bin12.metabat2	Bacteria	Actinobacteriota	Actinomycetia	Mycobacteriales	Mycobacteriaceae	Mycobacterium	Unassign	677	13371	3130992	67.72	4948	72.31	9.55	8
SGB0631	RS-A043_bin16.metabat2	Bacteria	Proteobacteria	Gammaproteobacteria	Steroidobacterales	Steroidobacteraceae	FEN-1191	Unassign	233	129273	3166493	65.53	21333	91.5	2.28	1
SGB0632	RS-A043_bin2.metabat2	Bacteria	Proteobacteria	Gammaproteobacteria	Pseudomonadales	Moraxellaceae	Acinetobacter	Acinetobacter pittii	24	396207	1697219	39.12	137513	50.9	0.27	4
SGB0633	RS-A043_bin22.metabat2	Bacteria	Acidobacteriota	Acidobacteriae	Bryobacterales	Bryobacteraceae	Palsa-187	Unassign	500	27481	2973982	59.28	6646	73.26	6.21	1
SGB0634	RS-A043_bin3.metabat2	Bacteria	Proteobacteria	Alphaproteobacteria	Rhizobiales	Xanthobacteraceae	Pseudolabrys	Unassign	988	44836	6759275	58.76	8047	74.39	9.26	1
SGB0635	RS-A043_bin4.metabat2	Bacteria	Acidobacteriota	Acidobacteriae	Acidobacteriales	Gp1-AA117	Gp1-AA17	Unassign	798	15992	3558698	55.8	4660	52.72	0.85	0
SGB0636	RS-A043_bin41.metabat2	Bacteria	Actinobacteriota	Acidimicrobiia	Acidimicrobiales	QHCF01	AC-9	Unassign	504	52033	4079929	69.9	10499	85.06	2.14	1
SGB0637	RS-A043_bins20.concoct	Bacteria	Actinobacteriota	Actinomycetia	Mycobacteriales	Unassign	Unassign	Unassign	718	14147	2697971	66.8	3908	52.43	2.74	0
SGB0638	RS-A045_bins12.concoct	Bacteria	Actinobacteriota	Actinomycetia	Mycobacteriales	Mycobacteriaceae	Mycobacterium	Unassign	875	27068	5153827	66.43	6755	75	2.14	11
SGB0639	RS-A046_bin13.metabat2	Bacteria	Acidobacteriota	Acidobacteriae	VXMN01	VXMN01	Unassign	Unassign	544	13851	2376816	48.79	4541	54.91	0	0
SGB0640	RS-A046_bin17.metabat2	Bacteria	Nitrospirota	Nitrospiria	Nitrospirales	Nitrospiraceae	Palsa-1315	Unassign	435	16920	2027091	55.01	4848	72.29	9.55	0
SGB0641	RS-A046_bin19.metabat2	Bacteria	Bacteroidota	Bacteroidia	Chitinophagales	Chitinophagaceae	VBAS01	Unassign	641	38109	4080981	37.38	7254	80.58	0.74	0
SGB0642	RS-A046_bin21.metabat2	Bacteria	Patescibacteria	Saccharimonadia	Saccharimonadales	UBA4665	PMNU01	Unassign	53	113564	1076684	52.17	41439	64.81	1.39	0
SGB0643	RS-A046_bin4.metabat2	Bacteria	Planctomycetota	Phycisphaerae	UBA1845	UTPLA1	Unassign	Unassign	623	13477	2753857	61.08	4672	54.09	3.86	0
SGB0644	RS-A047_bin12.metabat2	Bacteria	Proteobacteria	Gammaproteobacteria	Steroidobacterales	Steroidobacteraceae	FEN-1191	Unassign	110	87679	2501658	64.17	31583	53.69	1.55	5
SGB0645	RS-A047_bins22.concoct	Bacteria	Acidobacteriota	Thermoanaerobaculia	UBA5704	UBA5704	UBA5704	Unassign	966	31529	5582244	67.5	6642	67.2	2.14	43
SGB0646	RS-A048_bin1.metabat2	Bacteria	Actinobacteriota	Thermoleophilia	Solirubrobacterales	Solirubrobacteraceae	Palsa-744	Unassign	194	63249	2621230	68.34	19758	94.59	1.88	20
SGB0647	RS-A048_bin10.metabat2	Bacteria	Actinobacteriota	Thermoleophilia	Gaiellales	Gaiellaceae	3-1-20CM-4-69-9	Unassign	504	15757	1991569	66.83	3947	54.01	2.44	0
SGB0648	RS-A050_bin9.metabat2	Bacteria	Proteobacteria	Gammaproteobacteria	Steroidobacterales	Steroidobacteraceae	CAILZL01	Unassign	419	30789	2991660	58.66	8849	85.53	3.18	3
SGB0649	RS-A050_bins10.concoct	Bacteria	Actinobacteriota	Acidimicrobiia	IMCC26256	Unassign	Unassign	Unassign	536	10588	1815626	69.78	3492	63.85	2.56	0
SGB0650	RS-A050_bins19.concoct	Bacteria	Proteobacteria	Gammaproteobacteria	Burkholderiales	Burkholderiaceae	LMDS01	Unassign	356	90294	4945702	67.34	19018	94.4	2.62	2
SGB0651	RS-A050_bins24.concoct	Bacteria	Proteobacteria	Gammaproteobacteria	Burkholderiales	Casimicrobiaceae	PALSA-1003	Unassign	459	24517	2230016	66.99	5604	59.84	2.44	0
SGB0652	RS-A050_bins33.concoct	Bacteria	Proteobacteria	Alphaproteobacteria	Rhizobiales	Hyphomicrobiaceae	AWTP1-13	Unassign	943	12261	3467691	64.07	3904	54.37	0.01	0
SGB0653	RS-A052_bin1.metabat2	Bacteria	Proteobacteria	Alphaproteobacteria	Rhizobiales	Xanthobacteraceae	Pseudolabrys	Unassign	335	79149	3402875	59.9	13255	88.31	1.29	1
SGB0654	RS-A052_bin11.metabat2	Bacteria	Verrucomicrobiota	Verrucomicrobiae	Chthoniobacterales	UBA10450	Udaeobacter	Unassign	440	32818	2818104	54.77	7756	92.95	7.66	0
SGB0655	RS-A052_bin27.metabat2	Bacteria	Proteobacteria	Gammaproteobacteria	Pseudomonadales	Moraxellaceae	Acinetobacter	Acinetobacter idrijaensis	355	90574	2133852	43.67	6472	58.62	0	5
SGB0656	RS-A054.bins002.maxbin	Bacteria	Proteobacteria	Gammaproteobacteria	Pseudomonadales	Moraxellaceae	Acinetobacter	Acinetobacter johnsonii	698	74449	2923858	41.21	4269	57.58	1.81	0
SGB0657	RS-A054.bins006.maxbin	Bacteria	Proteobacteria	Alphaproteobacteria	Sphingomonadales	Sphingomonadaceae	Tardibacter	Unassign	57	211026	2019745	63.42	67396	58.26	2.17	2
SGB0658	RS-A054.bins009.maxbin	Bacteria	Nitrospirota	Nitrospiria	Nitrospirales	Nitrospiraceae	Palsa-1315	Unassign	766	26839	2541479	55.03	3164	56.05	3.94	0
SGB0659	RS-A054_bin1.metabat2	Bacteria	Actinobacteriota	Actinomycetia	Streptomycetales	Streptomycetaceae	Streptomyces	Unassign	1414	24310	8284859	70	6804	79.22	1.21	37
SGB0660	RS-A054_bin14.metabat2	Bacteria	Dependentiae	Babeliae	Babeliales	Vermiphilaceae	SOIL31	Unassign	218	12754	1028017	32.85	5035	63.31	0	0
SGB0661	RS-A054_bin20.metabat2	Bacteria	Proteobacteria	Alphaproteobacteria	Unassign	Unassign	Unassign	Unassign	298	47467	2684567	58.49	11797	93.93	1.54	1
SGB0662	RS-A054_bin31.metabat2	Bacteria	Proteobacteria	Alphaproteobacteria	Sphingomonadales	Sphingomonadaceae	Tardibacter	Unassign	57	211026	2608232	63.94	68940	94.78	0	2
SGB0663	RS-A055_bin18.metabat2	Bacteria	Desulfobacterota_B	Binatia	UBA9968	UBA9968	Unassign	Unassign	798	24358	3800488	54.19	4846	79.87	4.53	0
SGB0664	RS-A055_bins3.concoct	Bacteria	Proteobacteria	Gammaproteobacteria	Steroidobacterales	Steroidobacteraceae	PALSA-1196	Unassign	276	69514	3333580	63.08	16340	87.3	2.67	3
SGB0665	RS-A056_bin19.metabat2	Bacteria	Proteobacteria	Gammaproteobacteria	Burkholderiales	SG8-39	VBDM01	Unassign	385	16938	1614278	65.37	4261	54.27	2.66	0
SGB0666	RS-A056_bin22.metabat2	Bacteria	Actinobacteriota	Acidimicrobiia	IMCC26256	PALSA-555	Unassign	Unassign	305	67905	2482501	70.4	10111	59.12	1.72	0
SGB0667	RS-A056_bin24.metabat2	Bacteria	Patescibacteria	Microgenomatia	Levybacterales	UBA12049	JAHIGH01	Unassign	192	29404	1392519	39.44	8883	51.35	0.99	0
SGB0668	RS-A056_bin37.metabat2	Bacteria	Actinobacteriota	Thermoleophilia	Gaiellales	Gaiellaceae	GMQP-bins7	Unassign	280	53478	2743736	67.83	12765	83.85	7.18	0
SGB0669	RS-A056_bin40.metabat2	Bacteria	Actinobacteriota	Thermoleophilia	Gaiellales	Gaiellaceae	3-1-20CM-4-69-9	Unassign	178	68850	2899660	66.91	26773	97.49	6.49	0
SGB0670	RS-A056_bin49.metabat2	Bacteria	Proteobacteria	Gammaproteobacteria	Steroidobacterales	Steroidobacteraceae	13-2-20CM-66-19	Unassign	1010	21067	5486459	62.07	6039	71.11	9.45	0
SGB0671	RS-A056_bin6.metabat2	Bacteria	Actinobacteriota	Thermoleophilia	Solirubrobacterales	1970-09-01	Unassign	Unassign	253	14991	1116562	68.92	4395	56.56	0.86	0
SGB0672	RS-A056_bins11.concoct	Bacteria	Actinobacteriota	Thermoleophilia	Solirubrobacterales	Solirubrobacteraceae	Palsa-744	Unassign	180	54171	2523759	68.77	18421	85.67	0	1
SGB0673	RS-A056_bins15.concoct	Bacteria	Planctomycetota	Planctomycetia	Gemmatales	Gemmataceae	JACPZP01	Unassign	492	166908	6192874	60.72	17224	88.15	1.14	4
SGB0674	RS-A056_bins50.concoct	Bacteria	Proteobacteria	Gammaproteobacteria	Unassign	Unassign	Unassign	Unassign	484	27878	1677804	36.95	3547	57.47	0.68	0
SGB0675	RS-A057_bin6.metabat2	Bacteria	Cyanobacteria	Cyanobacteriia	Cyanobacteriales	Coleofasciculaceae	FACHB-SPT15	Unassign	803	27084	5284844	43.08	7679	81.09	0.89	1
SGB0676	RS-A059_bin10.metabat2	Bacteria	Proteobacteria	Gammaproteobacteria	Pseudomonadales	Moraxellaceae	Moraxella_A	Moraxella_A osloensis	276	13733	1251319	44.19	4597	55.94	0.64	0
SGB0677	RS-A059_bin17.metabat2	Bacteria	Actinobacteriota	Actinomycetia	Mycobacteriales	Mycobacteriaceae	Mycobacterium	Unassign	820	15872	3565614	67.63	4449	62.59	1.75	0
SGB0678	RS-A059_bin6.metabat2	Bacteria	Proteobacteria	Gammaproteobacteria	Pseudomonadales	Pseudomonadaceae	Pseudomonas_E	Pseudomonas_E asiatica	676	27532	3912303	63.78	6279	70.18	0	3
SGB0679	RS-A059_bins15.concoct	Bacteria	Proteobacteria	Gammaproteobacteria	Steroidobacterales	Steroidobacteraceae	13-2-20CM-66-19	Unassign	943	27193	5416286	63.13	6660	67.24	0	0
SGB0680	RS-A059_bins21.concoct	Bacteria	Actinobacteriota	Thermoleophilia	Gaiellales	Gaiellaceae	Palsa-739	Unassign	313	33047	2106359	69.21	7761	50.16	0.86	0
SGB0681	RS-A060_bin16.metabat2	Bacteria	Bacteroidota	Bacteroidia	Chitinophagales	Chitinophagaceae	Puia	Unassign	468	36264	3340942	45.79	8689	84.02	3.4	5
SGB0682	RS-A060_bin24.metabat2	Bacteria	Proteobacteria	Alphaproteobacteria	Sphingomonadales	Sphingomonadaceae	Novosphingobium	Unassign	249	122391	4264549	63.46	27641	94.7	2.63	4
SGB0683	RS-A060_bin3.metabat2	Bacteria	Bacteroidota	Bacteroidia	Chitinophagales	Chitinophagaceae	Puia	Unassign	647	23269	3914918	53.82	6532	65.55	1.48	1
SGB0684	RS-A060_bin35.metabat2	Bacteria	Dormibacterota	Dormibacteria	Dormibacterales	Dormibacteraceae	Unassign	Unassign	348	21029	2025343	69.6	6654	50.26	0	0
SGB0685	RS-A060_bin38.metabat2	Bacteria	Bacteroidota	Bacteroidia	Flavobacteriales	Flavobacteriaceae	Flavobacterium	Unassign	449	45306	3460291	43.97	9031	83.06	0.71	0
SGB0686	RS-A060_bin39.metabat2	Bacteria	Proteobacteria	Gammaproteobacteria	Burkholderiales	Burkholderiaceae	Massilia	Massilia alkalitolerans	592	17778	2428193	65.76	4089	54.7	0.51	0
SGB0687	RS-A060_bin54.metabat2	Bacteria	Proteobacteria	Alphaproteobacteria	Rhizobiales	Hyphomicrobiaceae	Hyphomicrobium_A	Unassign	280	46724	2275552	64.58	11010	78.37	4.17	0
SGB0688	RS-A060_bin7.metabat2	Bacteria	Actinobacteriota	Thermoleophilia	Solirubrobacterales	1970-09-01	Unassign	Unassign	249	67856	2254629	68.53	11847	76.58	5.75	0
SGB0689	RS-A060_bins6.concoct	Bacteria	Actinobacteriota	Acidimicrobiia	Acidimicrobiales	JAFATL01	Unassign	Unassign	464	15000	1710520	56.39	3855	55.38	1.28	0
SGB0690	RS-A060_bins69.concoct	Bacteria	Actinobacteriota	Actinomycetia	Mycobacteriales	Mycobacteriaceae	Nocardia	Unassign	1096	37246	6856765	66.19	6874	58.98	2.85	52
SGB0691	RS-A061.bins015.maxbin	Bacteria	Proteobacteria	Alphaproteobacteria	Rhizobiales	Methyloligellaceae	Methyloceanibacter	Unassign	195	89620	1662864	62.33	17154	59.5	2.42	0
SGB0692	RS-A061.bins017.maxbin	Bacteria	Proteobacteria	Alphaproteobacteria	Rhizobiales	Hyphomicrobiaceae	Hyphomicrobium	Unassign	296	18470	1260550	61.81	4979	51.67	2.04	0
SGB0693	RS-A061_bin10.metabat2	Bacteria	Proteobacteria	Alphaproteobacteria	Rhizobiales	Xanthobacteraceae	Pseudolabrys	Unassign	688	26286	3423912	59.68	5160	55.57	3.09	0
SGB0694	RS-A062.bins024.maxbin	Bacteria	Dormibacterota	Dormibacteria	CF-121	CF-121	CF-13	Unassign	644	25490	2370520	65.52	3774	75.52	7.22	0
SGB0695	RS-A062_bin27.metabat2	Bacteria	Patescibacteria	Saccharimonadia	Saccharimonadales	Unassign	Unassign	Unassign	45	78155	1032397	46.43	36797	63.49	1.14	0
SGB0696	RS-A062_bin4.metabat2	Bacteria	Acidobacteriota	Acidobacteriae	Acidoferrales	UBA7541	Acidoferrum	Unassign	214	130160	5045280	57.94	39732	87.83	2.99	0
SGB0697	RS-A063.bins030.maxbin	Bacteria	Actinobacteriota	Actinomycetia	Mycobacteriales	Mycobacteriaceae	Mycobacterium	Unassign	1386	22422	4651263	67.88	3351	54.15	4.85	0
SGB0698	RS-A063_bin15.metabat2	Bacteria	Proteobacteria	Alphaproteobacteria	Rhizobiales	Methyloligellaceae	Methyloceanibacter	Unassign	313	23141	1673078	61.03	5807	55.13	1.14	0
SGB0699	RS-A064_bin10.metabat2	Bacteria	Actinobacteriota	Thermoleophilia	Solirubrobacterales	Solirubrobacteraceae	VAWY01	Unassign	514	43088	3306252	71.76	7500	79.04	1.88	0
SGB0700	RS-A064_bin14.metabat2	Bacteria	Actinobacteriota	Thermoleophilia	Solirubrobacterales	Solirubrobacteraceae	Palsa-465	Unassign	380	75431	3661520	68.87	13214	87.83	1.71	1
SGB0701	RS-A064_bin18.metabat2	Bacteria	Actinobacteriota	Thermoleophilia	Solirubrobacterales	Solirubrobacteraceae	Palsa-465	Unassign	146	91060	2552170	66.9	28556	95.24	0.85	2
SGB0702	RS-A064_bin3.metabat2	Bacteria	Acidobacteriota	Vicinamibacteria	Vicinamibacterales	UBA2999	2-12-FULL-65-11	Unassign	83	174768	3900997	65	75665	98.29	4.32	3
SGB0703	RS-A064_bin6.metabat2	Bacteria	Proteobacteria	Gammaproteobacteria	Steroidobacterales	Steroidobacteraceae	13-2-20CM-66-19	Unassign	299	145325	4850469	62.55	31976	95.46	6.07	4
SGB0704	RS-A064_bins39.concoct	Bacteria	Actinobacteriota	Thermoleophilia	Solirubrobacterales	1970-09-01	Unassign	Unassign	304	50122	2618514	67.87	10693	85.2	2.16	0
SGB0705	RS-A065_bin11.metabat2	Bacteria	Actinobacteriota	Thermoleophilia	Solirubrobacterales	1970-09-01	Unassign	Unassign	313	41585	1655898	69.87	5668	61.95	3.3	0
SGB0706	RS-A065_bin17.metabat2	Bacteria	Proteobacteria	Gammaproteobacteria	Steroidobacterales	Steroidobacteraceae	13-2-20CM-66-19	Unassign	255	97124	4339024	63.41	27670	95.63	6.26	4
SGB0707	RS-A065_bin26.metabat2	Bacteria	Proteobacteria	Gammaproteobacteria	Burkholderiales	Rhodocyclaceae	Unassign	Unassign	337	39674	2113929	60.91	7110	58.96	0.47	0
SGB0708	RS-A065_bin32.metabat2	Bacteria	Acidobacteriota	Acidobacteriae	Acidobacteriales	SbA1	Sulfotelmatobacter	Unassign	700	39482	4940265	57.18	8545	61.73	3.42	0
SGB0709	RS-A065_bin44.metabat2	Bacteria	Proteobacteria	Gammaproteobacteria	Burkholderiales	Burkholderiaceae	Pseudoduganella	Unassign	597	50086	3651149	63.23	7221	57.01	0	0
SGB0710	RS-A065_bins36.concoct	Bacteria	Proteobacteria	Gammaproteobacteria	Xanthomonadales	Rhodanobacteraceae	Dyella	Unassign	468	38647	3610170	65.16	10218	60.34	1.72	1
SGB0711	RS-A065_bins44.concoct	Bacteria	Bdellovibrionota	Bdellovibrionia_A	UBA1018	UBA1018	CAINWE01	Unassign	701	69374	2911361	43.73	4019	53.23	1.89	0
SGB0712	RS-A066.bins018.maxbin	Bacteria	Actinobacteriota	Actinomycetia	Mycobacteriales	Mycobacteriaceae	Mycobacterium	Unassign	1025	27972	4620347	68.25	5191	73.32	7.83	10
SGB0713	RS-A066.bins040.maxbin	Bacteria	Acidobacteriota	Acidobacteriae	Bryobacterales	Bryobacteraceae	Unassign	Unassign	479	180097	4232937	61.71	26251	59.99	1.75	0
SGB0714	RS-A066_bin15.metabat2	Bacteria	Chloroflexota	Limnocylindria	QHBO01	QHBO01	CF-82	Unassign	371	39488	2342386	67.59	7558	78.74	2.78	0
SGB0715	RS-A066_bin16.metabat2	Bacteria	Actinobacteriota	Thermoleophilia	Solirubrobacterales	Solirubrobacteraceae	Palsa-744	Unassign	281	51305	2798350	67.77	15034	92.42	2.99	1
SGB0716	RS-A066_bin18.metabat2	Bacteria	Proteobacteria	Alphaproteobacteria	Rhizobiales	Xanthobacteraceae	VAZQ01	Unassign	591	33263	3950056	64.39	8062	78.51	9.09	0
SGB0717	RS-A066_bin2.metabat2	Bacteria	Desulfobacterota_B	Binatia	Binatales	Binataceae	JADMIL01	Unassign	495	24128	2867216	60.94	6319	64.11	1.72	0
SGB0718	RS-A066_bin20.metabat2	Bacteria	Proteobacteria	Gammaproteobacteria	Steroidobacterales	Steroidobacteraceae	Unassign	Unassign	65	193698	3306584	65.52	85534	91.58	2.66	4
SGB0719	RS-A066_bin35.metabat2	Bacteria	Actinobacteriota	Actinomycetia	Mycobacteriales	CAJCIY01	CAJCIY01	Unassign	67	231555	2593944	66.01	79871	90.59	1.18	21
SGB0720	RS-A066_bin36.metabat2	Bacteria	Proteobacteria	Gammaproteobacteria	Burkholderiales	Rhodocyclaceae	Unassign	Unassign	374	72201	2548766	63.13	8434	78	1.81	3
SGB0721	RS-A066_bin4.metabat2	Bacteria	Acidobacteriota	Thermoanaerobaculia	UBA5704	UBA5704	Unassign	Unassign	940	27657	4401067	70.57	4856	69.57	1.71	1
SGB0722	RS-A066_bin54.metabat2	Bacteria	Dormibacterota	Dormibacteria	Dormibacterales	Dormibacteraceae	40CM-4-65-16	Unassign	260	60346	3254463	67.72	19252	94.14	4.54	0
SGB0723	RS-A066_bins30.concoct	Bacteria	Actinobacteriota	Actinomycetia	Mycobacteriales	JAFAQI01	JAFAQI01	Unassign	79	152079	3269697	67.96	60251	97.74	0.05	24
SGB0724	RS-A067_bin9.metabat2	Bacteria	Actinobacteriota	Thermoleophilia	Solirubrobacterales	Solirubrobacteraceae	Palsa-744	Unassign	351	24644	2027872	69.38	6271	75.61	0.85	0
SGB0725	RS-A068.bins005.maxbin	Bacteria	Proteobacteria	Gammaproteobacteria	Pseudomonadales	Moraxellaceae	Acinetobacter	Unassign	773	74394	4292203	38.1	7105	86.16	3.65	18
SGB0726	RS-A068.bins019.maxbin	Bacteria	Proteobacteria	Gammaproteobacteria	Enterobacterales	Enterobacteriaceae	Serratia	Serratia bockelmannii	108	234317	4967032	59.7	90764	96.36	2.73	37
SGB0727	RS-A068.bins026.maxbin	Bacteria	Proteobacteria	Gammaproteobacteria	Steroidobacterales	Steroidobacteraceae	13-2-20CM-66-19	Unassign	604	16006	2384195	70.45	4241	50	3.45	0
SGB0728	RS-A068.bins048.maxbin	Bacteria	Proteobacteria	Alphaproteobacteria	Rhizobiales	Methyloligellaceae	Methyloceanibacter	Unassign	739	21192	2811310	62.34	3991	67.02	4.58	1
SGB0729	RS-A068.bins056.maxbin	Bacteria	Myxococcota	Polyangia	Haliangiales	Haliangiaceae	JABFXX01	Unassign	1719	14389	5260302	67.41	3022	50.8	4.39	0
SGB0730	RS-A068_bin13.metabat2	Bacteria	Actinobacteriota	Actinomycetia	Mycobacteriales	Mycobacteriaceae	Mycobacterium	Unassign	900	16711	3871903	67.66	4379	63.68	2.48	7
SGB0731	RS-A068_bin16.metabat2	Bacteria	Proteobacteria	Gammaproteobacteria	Steroidobacterales	Steroidobacteraceae	13-2-20CM-66-19	Unassign	149	90346	1933357	68.05	17355	55.67	0.86	1
SGB0732	RS-A068_bin19.metabat2	Bacteria	Patescibacteria	Saccharimonadia	Saccharimonadales	EFPC-124	Unassign	Unassign	48	116925	1079537	55.94	35965	62.65	0.46	0
SGB0733	RS-A068_bins1.concoct	Bacteria	Proteobacteria	Gammaproteobacteria	Enterobacterales	Enterobacteriaceae	Enterobacter	Enterobacter soli	241	222649	4768383	54	38000	94.92	9.09	25
SGB0734	RS-A068_bins16.concoct	Bacteria	Proteobacteria	Gammaproteobacteria	Xanthomonadales	Xanthomonadaceae	Stenotrophomonas	Stenotrophomonas maltophilia_AL	460	51121	3297507	66.82	8978	63.79	0.86	3
SGB0735	RS-A068_bins23.concoct	Bacteria	Firmicutes	Bacilli	Paenibacillales	Paenibacillaceae	Paenibacillus	Unassign	299	90630	4910993	45.91	25452	96.91	0.88	13
SGB0736	RS-A068_bins33.concoct	Bacteria	Patescibacteria	Saccharimonadia	Saccharimonadales	Unassign	Unassign	Unassign	214	25294	937382	45.55	4799	50.59	2.88	0
SGB0737	RS-A068_bins5.concoct	Bacteria	Chloroflexota	Limnocylindria	Limnocylindrales	CSP1-4	SPCO01	Unassign	403	16554	1942514	69.89	5534	51.67	3.51	0
SGB0738	RS-A068_bins53.concoct	Bacteria	Acidobacteriota	Thermoanaerobaculia	UBA5704	UBA5704	UBA5704	Unassign	590	70701	7624017	67.7	17220	86.18	3.47	31
SGB0739	RS-A068_bins61.concoct	Bacteria	Proteobacteria	Gammaproteobacteria	Steroidobacterales	Steroidobacteraceae	13-2-20CM-66-19	Unassign	157	233127	3861622	62.66	42604	94.31	5.45	9
SGB0740	RS-A068_bins8.concoct	Bacteria	Proteobacteria	Gammaproteobacteria	Steroidobacterales	Steroidobacteraceae	Bog-1198	Unassign	747	22925	3735738	62.16	5681	57.05	1.72	0
SGB0741	RS-A069.bins002.maxbin	Bacteria	Proteobacteria	Gammaproteobacteria	Pseudomonadales	Moraxellaceae	Acinetobacter	Acinetobacter pittii	227	72492	3038171	38.8	24892	68.35	0.64	13
SGB0742	RS-A069_bin19.metabat2	Bacteria	Acidobacteriota	Acidobacteriae	Acidoferrales	UBA7541	Acidoferrum	Unassign	268	172922	5220151	58.43	36113	83.21	7.34	0
SGB0743	RS-A069_bin29.metabat2	Bacteria	Bacteroidota	Bacteroidia	Sphingobacteriales	Sphingobacteriaceae	Mucilaginibacter	Unassign	557	27611	4036686	42.46	8502	83.1	1.11	0
SGB0744	RS-A069_bin33.metabat2	Bacteria	Proteobacteria	Gammaproteobacteria	Enterobacterales	Enterobacteriaceae	Enterobacter	Enterobacter ludwigii	14	316636	2209468	55.14	251286	52.62	0.04	4
SGB0745	RS-A069_bins9.concoct	Bacteria	Proteobacteria	Gammaproteobacteria	Burkholderiales	Burkholderiaceae	VBCK01	Unassign	836	51377	2677151	65.25	3158	56.58	4.02	0
SGB0746	RS-B001.bins062.maxbin	Bacteria	Firmicutes	Bacilli	Bacillales_B	Bacillaceae_B	Rossellomorea	Rossellomorea marisflavi	508	35343	2473624	48.51	5678	75.67	1.03	0
SGB0747	RS-B001.bins064.maxbin	Bacteria	Firmicutes	Bacilli	Bacillales	Bacillaceae	Bacillus	Bacillus altitudinis	710	58153	2675637	41.33	3819	55.58	4.94	0
SGB0748	RS-B001.bins072.maxbin	Bacteria	Proteobacteria	Alphaproteobacteria	Sphingomonadales	Sphingomonadaceae	Sphingobium	Unassign	176	142972	3408385	63.55	35458	85.45	5.13	9
SGB0749	RS-B001.bins224.maxbin	Bacteria	Actinobacteriota	Acidimicrobiia	UBA5794	ZC4RG35	MA-ANB-1	Unassign	350	74699	2633025	66.03	11451	79.32	6.31	0
SGB0750	RS-B001.bins266.maxbin	Bacteria	Actinobacteriota	Acidimicrobiia	UBA5794	ZC4RG35	Unassign	Unassign	530	23164	2251554	66.58	4768	57.07	3.45	0
SGB0751	RS-B001_bin105.metabat2	Bacteria	Acidobacteriota	Blastocatellia	Pyrinomonadales	Pyrinomonadaceae	UBA11740	Unassign	297	39851	2068429	56.01	8038	52.18	0.85	0
SGB0752	RS-B001_bin108.metabat2	Bacteria	Desulfobacterota_B	Binatia	HRBIN30	Unassign	Unassign	Unassign	820	29068	4959893	68.59	7101	60.4	3.85	0
SGB0753	RS-B001_bin11.metabat2	Bacteria	Bacteroidota	Bacteroidia	Chitinophagales	Saprospiraceae	JADKGY01	Unassign	293	51209	3403889	43.66	15457	69.66	0	0
SGB0754	RS-B001_bin112.metabat2	Bacteria	Firmicutes	Bacilli	Bacillales	Bacillaceae	Bacillus_P	Unassign	336	34981	2228679	44.65	7219	55.36	0.89	0
SGB0755	RS-B001_bin121.metabat2	Bacteria	Proteobacteria	Gammaproteobacteria	Pseudomonadales	Halieaceae	Halioglobus	Unassign	432	57623	4012295	61.36	12041	62.93	0	0
SGB0756	RS-B001_bin127.metabat2	Bacteria	Actinobacteriota	Thermoleophilia	Gaiellales	Gaiellaceae	Palsa-739	Unassign	213	55836	2274487	69.22	15896	77.16	9.97	0
SGB0757	RS-B001_bin131.metabat2	Bacteria	Bacteroidota	Bacteroidia	Cytophagales	Cyclobacteriaceae	Chryseolinea	Unassign	593	44110	4882732	44.08	9432	82.29	3.01	5
SGB0758	RS-B001_bin132.metabat2	Bacteria	Acidobacteriota	Blastocatellia	Pyrinomonadales	Pyrinomonadaceae	PSRF01	Unassign	580	33892	4383826	50.52	8378	71.22	1.71	15
SGB0759	RS-B001_bin136.metabat2	Bacteria	Acidobacteriota	Blastocatellia	Pyrinomonadales	Pyrinomonadaceae	UBA11740	Unassign	400	15279	2078522	57.13	5479	51.03	1.72	0
SGB0760	RS-B001_bin140.metabat2	Bacteria	Planctomycetota	Planctomycetia	Pirellulales	Pirellulaceae	BJ22	Unassign	484	37502	3623011	55.66	8223	89.77	0.1	0
SGB0761	RS-B001_bin141.metabat2	Bacteria	Proteobacteria	Gammaproteobacteria	Pseudomonadales	Moraxellaceae	Moraxella_A	Moraxella_A sp002478835	224	30254	1412135	44.58	6687	62.97	0	0
SGB0762	RS-B001_bin155.metabat2	Bacteria	Actinobacteriota	Thermoleophilia	Solirubrobacterales	1970-09-01	Unassign	Unassign	63	137035	2345935	69.11	55721	96.21	2.71	28
SGB0763	RS-B001_bin157.metabat2	Bacteria	Actinobacteriota	Acidimicrobiia	UBA5794	ZC4RG35	SZUA-217	Unassign	354	13073	1607128	62.46	4672	61.3	0	0
SGB0764	RS-B001_bin158.metabat2	Bacteria	Actinobacteriota	Acidimicrobiia	IMCC26256	Unassign	Unassign	Unassign	466	28028	2906833	67.75	7152	78.67	3.42	0
SGB0765	RS-B001_bin160.metabat2	Bacteria	Bacteroidota	Bacteroidia	Chitinophagales	Chitinophagaceae	UBA3961	Unassign	635	46477	4860529	39.88	9257	78.71	3.69	0
SGB0766	RS-B001_bin161.metabat2	Bacteria	Desulfobacterota_B	Binatia	HRBIN30	Unassign	Unassign	Unassign	386	125655	5818388	66.21	23836	94.12	3.78	0
SGB0767	RS-B001_bin163.metabat2	Bacteria	Verrucomicrobiota	Verrucomicrobiae	Chthoniobacterales	Chthoniobacteraceae	Unassign	Unassign	842	18250	4400864	59.89	5697	67.36	4.5	0
SGB0768	RS-B001_bin165.metabat2	Bacteria	Planctomycetota	Planctomycetia	Planctomycetales	Planctomycetaceae	Unassign	Unassign	970	22747	5204207	58.9	5687	68	3.57	0
SGB0769	RS-B001_bin170.metabat2	Bacteria	Proteobacteria	Alphaproteobacteria	Caulobacterales	Caulobacteraceae	Caulobacter	Caulobacter henricii_D	758	15136	3487422	68.69	4810	53.93	2.4	0
SGB0770	RS-B001_bin172.metabat2	Bacteria	Bacteroidota	Bacteroidia	Chitinophagales	Chitinophagaceae	JADCRZ01	Unassign	212	49522	2009812	43.3	11753	86.83	2.96	0
SGB0771	RS-B001_bin173.metabat2	Bacteria	Acidobacteriota	Vicinamibacteria	Bin61	SMYC01	Unassign	Unassign	876	13309	3500658	65.96	4040	54.31	1.72	3
SGB0772	RS-B001_bin179.metabat2	Bacteria	Proteobacteria	Alphaproteobacteria	Caulobacterales	Caulobacteraceae	NCED01	Unassign	425	31729	2885234	70.22	8125	74.48	3.14	0
SGB0773	RS-B001_bin180.metabat2	Bacteria	Firmicutes	Bacilli	Bacillales_G	Fictibacillaceae	Fictibacillus	Fictibacillus halophilus	326	68482	3106876	39.09	11757	56.9	0	1
SGB0774	RS-B001_bin181.metabat2	Bacteria	Acidobacteriota	Vicinamibacteria	Vicinamibacterales	UBA2999	2-02-FULL-65-29	Unassign	126	210906	3867024	64.81	60960	78.16	4.27	0
SGB0775	RS-B001_bin182.metabat2	Bacteria	Proteobacteria	Gammaproteobacteria	Burkholderiales	Burkholderiaceae	Rhizobacter	Unassign	234	139047	6072287	67.85	39840	80.17	0	24
SGB0776	RS-B001_bin183.metabat2	Bacteria	Proteobacteria	Alphaproteobacteria	Rhodobacterales	Rhodobacteraceae	Paracoccus	Paracoccus sp009711265	46	310611	3703756	64.96	123419	98.11	0.61	26
SGB0777	RS-B001_bin19.metabat2	Bacteria	Proteobacteria	Alphaproteobacteria	Sphingomonadales	Sphingomonadaceae	Novosphingobium	Unassign	126	99896	2689437	60.62	36496	94.12	2.93	1
SGB0778	RS-B001_bin191.metabat2	Bacteria	Bacteroidota	Bacteroidia	Cytophagales	Spirosomaceae	Dyadobacter	Unassign	278	136280	7051832	49.99	39854	91.73	0	6
SGB0779	RS-B001_bin196.metabat2	Bacteria	Myxococcota_A	UBA9160	UBA9160	SMWR01	Unassign	Unassign	610	19706	2627494	71.61	4468	50.25	0.86	0
SGB0780	RS-B001_bin198.metabat2	Bacteria	Acidobacteriota	Acidobacteriae	20CM-2-55-15	20CM-2-55-15	Unassign	Unassign	550	57986	5182178	56.97	11335	81.45	7.86	0
SGB0781	RS-B001_bin211.metabat2	Bacteria	Patescibacteria	Paceibacteria	Moranbacterales	UBA1568	Unassign	Unassign	39	56786	828139	45.66	25320	67.99	0.5	0
SGB0782	RS-B001_bin214.metabat2	Bacteria	Actinobacteriota	Thermoleophilia	Gaiellales	Gaiellaceae	Unassign	Unassign	291	44230	2661369	72.71	11787	81.05	7.18	0
SGB0783	RS-B001_bin217.metabat2	Bacteria	Gemmatimonadota	Gemmatimonadetes	Gemmatimonadales	Gemmatimonadaceae	UBA4720	Unassign	399	19896	2265503	60.33	6143	62.36	3.3	0
SGB0784	RS-B001_bin219.metabat2	Bacteria	Firmicutes	Bacilli	Bacillales_D	Amphibacillaceae	Terribacillus	Terribacillus saccharophilus	239	43996	1775403	43.24	7919	50.88	1.75	0
SGB0785	RS-B001_bin22.metabat2	Bacteria	Actinobacteriota	Acidimicrobiia	UBA5794	ZC4RG35	Unassign	Unassign	226	83839	2314274	65.33	13788	92.54	3.47	0
SGB0786	RS-B001_bin220.metabat2	Bacteria	Planctomycetota	Phycisphaerae	Phycisphaerales	SM1A02	Unassign	Unassign	397	14887	1936815	60.23	5191	53.68	0	0
SGB0787	RS-B001_bin221.metabat2	Bacteria	Krumholzibacteriota	Krumholzibacteria	WVZY01	Unassign	Unassign	Unassign	416	18432	2258694	62.87	5789	60.34	1.72	0
SGB0788	RS-B001_bin224.metabat2	Bacteria	Eisenbacteria	RBG-16-71-46	JABDJR01	Unassign	Unassign	Unassign	363	19164	1982674	61.92	5624	68.86	0	0
SGB0789	RS-B001_bin234.metabat2	Bacteria	Chloroflexota	Limnocylindria	Limnocylindrales	CSP1-4	CSP1-4	Unassign	368	30303	2064847	71.16	6402	56.03	1.72	0
SGB0790	RS-B001_bin239.metabat2	Bacteria	Proteobacteria	Alphaproteobacteria	Sphingomonadales	Sphingomonadaceae	Croceibacterium	Unassign	335	36894	2292564	66.79	7898	67.54	2.47	0
SGB0791	RS-B001_bin240.metabat2	Bacteria	Bacteroidota	Bacteroidia	Chitinophagales	Saprospiraceae	JADKGY01	Unassign	201	109725	3888166	44.79	26068	91.56	0.03	1
SGB0792	RS-B001_bin245.metabat2	Bacteria	Proteobacteria	Alphaproteobacteria	Sphingomonadales	Sphingomonadaceae	Sphingobium	Unassign	233	54370	2396097	64.14	17152	67.66	2.64	9
SGB0793	RS-B001_bin246.metabat2	Bacteria	Proteobacteria	Gammaproteobacteria	Pseudomonadales	HTCC2089	SZUA-521	Unassign	587	22393	3195846	63.97	6078	69.31	1.72	0
SGB0794	RS-B001_bin247.metabat2	Bacteria	UBA10199	UBA10199	DSSB01	DSSB01	DSSB01	Unassign	118	105123	2981368	55.07	37953	85.45	1.68	6
SGB0795	RS-B001_bin251.metabat2	Bacteria	Proteobacteria	Gammaproteobacteria	Woeseiales	Woeseiaceae	UBA1844	Unassign	103	160727	2763840	64.23	53420	80.02	2.18	0
SGB0796	RS-B001_bin257.metabat2	Bacteria	Proteobacteria	Alphaproteobacteria	Rhizobiales	Rhizobiaceae	Pararhizobium	Pararhizobium giardinii	348	74185	3940264	61.75	15954	88.43	5.16	0
SGB0797	RS-B001_bin27.metabat2	Bacteria	Acidobacteriota	Vicinamibacteria	Vicinamibacterales	2-12-FULL-66-21	JACCRT01	Unassign	454	52815	5388028	67.75	17408	65.52	4.31	0
SGB0798	RS-B001_bin36.metabat2	Bacteria	Actinobacteriota	Acidimicrobiia	UBA5794	UBA11373	UBA11373	Unassign	278	30261	1897102	67.86	7899	75.64	3.85	0
SGB0799	RS-B001_bin45.metabat2	Bacteria	Chloroflexota	Limnocylindria	QHBO01	QHBO01	Unassign	Unassign	218	15580	1032638	70.28	5110	55.08	1.11	0
SGB0800	RS-B001_bin48.metabat2	Bacteria	Proteobacteria	Gammaproteobacteria	Steroidobacterales	Steroidobacteraceae	FEN-1191	Unassign	47	277782	3269928	64.06	126685	96.25	2.43	3
SGB0801	RS-B001_bin52.metabat2	Bacteria	Bacteroidota	Bacteroidia	Chitinophagales	Chitinophagaceae	Flavitalea	Unassign	614	37649	4813287	42.84	9371	85.3	6.77	6
SGB0802	RS-B001_bin57.metabat2	Bacteria	Acidobacteriota	Vicinamibacteria	Vicinamibacterales	SCN-69-37	Unassign	Unassign	432	59171	3694108	62.47	10620	67.57	2.99	0
SGB0803	RS-B001_bin60.metabat2	Bacteria	Methylomirabilota	Methylomirabilia	Rokubacteriales	CSP1-6	AR5	Unassign	537	64862	6027186	70.23	16370	82.1	5.99	1
SGB0804	RS-B001_bin62.metabat2	Bacteria	Bacteroidota	Bacteroidia	Chitinophagales	Saprospiraceae	JADKGY01	Unassign	244	37517	1909923	43.34	8319	60.02	0.17	0
SGB0805	RS-B001_bin64.metabat2	Bacteria	Acidobacteriota	Vicinamibacteria	Fen-336	Fen-336	Unassign	Unassign	932	35384	5777138	72.29	7006	75.17	5.17	0
SGB0806	RS-B001_bin65.metabat2	Bacteria	Acidobacteriota	Vicinamibacteria	Vicinamibacterales	2-12-FULL-66-21	Unassign	Unassign	851	51900	7874038	70.3	13728	69.66	4.31	0
SGB0807	RS-B001_bin66.metabat2	Bacteria	Proteobacteria	Gammaproteobacteria	Burkholderiales	SG8-41	DSOT01	Unassign	381	77690	4258047	64.69	17249	68.62	3.45	0
SGB0808	RS-B001_bin7.metabat2	Bacteria	Bacteroidota	Bacteroidia	Chitinophagales	Chitinophagaceae	Unassign	Unassign	522	55285	5333802	43.4	14284	89.52	2	2
SGB0809	RS-B001_bin78.metabat2	Bacteria	Acidobacteriota	Vicinamibacteria	Vicinamibacterales	UBA2999	2-02-FULL-65-29	Unassign	883	52134	6482699	65.98	8948	60.34	4.31	0
SGB0810	RS-B001_bin80.metabat2	Bacteria	Gemmatimonadota	Gemmatimonadetes	Gemmatimonadales	GWC2-71-9	JACDDX01	Unassign	416	66608	2889767	69.89	8093	55.17	0	0
SGB0811	RS-B001_bin9.metabat2	Bacteria	Chloroflexota	Limnocylindria	Limnocylindrales	CSP1-4	Unassign	Unassign	403	35453	3076306	69.46	9738	70.28	0	0
SGB0812	RS-B001_bin91.metabat2	Bacteria	Actinobacteriota	Thermoleophilia	Gaiellales	Gaiellaceae	Gaiella	Unassign	247	37942	2102306	70.4	10858	66.38	3.45	0
SGB0813	RS-B001_bin94.metabat2	Bacteria	Planctomycetota	Planctomycetia	Gemmatales	Gemmataceae	Unassign	Unassign	581	95042	8153996	62.47	20405	84.95	6.82	0
SGB0814	RS-B001_bin97.metabat2	Bacteria	Proteobacteria	Alphaproteobacteria	Rhizobiales	Aestuariivirgaceae	Aestuariivirga	Unassign	360	35190	2545391	60.77	8319	60.34	3.45	0
SGB0815	RS-B001_bins100.concoct	Bacteria	Bacteroidota	Bacteroidia	Flavobacteriales	PHOS-HE28	PHOS-HE28	Unassign	602	9769	1924569	63.5	3195	52.23	0	0
SGB0816	RS-B001_bins105.concoct	Bacteria	Acidobacteriota	Mor1	QHYA01	QHYA01	Unassign	Unassign	234	38484	2346289	69.28	11744	59.12	0.85	0
SGB0817	RS-B001_bins162.concoct	Bacteria	Proteobacteria	Alphaproteobacteria	Caulobacterales	TH1-2	Terricaulis	Unassign	235	65670	2818834	63.4	18845	88.67	1.7	0
SGB0818	RS-B001_bins38.concoct	Bacteria	Proteobacteria	Gammaproteobacteria	Burkholderiales	WYBJ01	Unassign	Unassign	483	67286	5398600	61.91	13878	68.1	1.72	0
SGB0819	RS-B001_bins47.concoct	Bacteria	Proteobacteria	Gammaproteobacteria	Burkholderiales	Burkholderiaceae	Polaromonas	Unassign	721	11434	2438314	65.8	3450	57.48	1	0
SGB0820	RS-B001_bins69.concoct	Bacteria	Acidobacteriota	Vicinamibacteria	Vicinamibacterales	UBA2999	JACCSI01	Unassign	668	33989	4485695	61.44	7944	84.63	8.97	0
SGB0821	RS-B001_bins7.concoct	Bacteria	Chloroflexota	Anaerolineae	UCB3	Unassign	Unassign	Unassign	339	46950	3064450	70.42	11958	73.39	2.02	0
SGB0822	RS-B002.bins001.maxbin	Bacteria	Firmicutes	Bacilli	Bacillales	Bacillaceae_H	Priestia	Priestia megaterium_A	535	34681	1759705	38.8	3162	77.19	6.51	0
SGB0823	RS-B002.bins006.maxbin	Bacteria	Proteobacteria	Gammaproteobacteria	Enterobacterales	Enterobacteriaceae	Enterobacter	Enterobacter asburiae_B	45	478097	4472980	56.13	238545	99.97	0.56	23
SGB0824	RS-B002.bins016.maxbin	Bacteria	Proteobacteria	Alphaproteobacteria	Rhizobiales	Xanthobacteraceae	Palsa-892	Unassign	152	65267	1758941	61.18	20906	53.49	3.48	2
SGB0825	RS-B002.bins019.maxbin	Bacteria	Firmicutes	Bacilli	Bacillales_B	Bacillaceae_B	Rossellomorea	Rossellomorea aquimaris_D	72	240019	3261920	42.35	98082	64.26	4.47	2
SGB0826	RS-B002_bin17.metabat2	Bacteria	Firmicutes	Bacilli	Bacillales_B	Bacillaceae_B	Rossellomorea	Rossellomorea marisflavi_A	70	302607	3314068	48.83	66617	65.86	0.6	1
SGB0827	RS-B002_bin30.metabat2	Bacteria	Verrucomicrobiota	Verrucomicrobiae	Chthoniobacterales	UBA10450	AV40	Unassign	346	17865	1761440	55.84	5481	73.01	1.01	0
SGB0828	RS-B002_bin32.metabat2	Bacteria	Acidobacteriota	Acidobacteriae	Acidobacteriales	SbA1	Gp1-AA145	Unassign	693	36065	3954997	57.21	6422	69.98	4.27	2
SGB0829	RS-B002_bins0.concoct	Bacteria	Proteobacteria	Gammaproteobacteria	REEB76	REEB76	Unassign	Unassign	283	56089	2719037	66.22	13002	90.13	2.31	3
SGB0830	RS-B002_bins45.concoct	Bacteria	Proteobacteria	Gammaproteobacteria	Enterobacterales	Aeromonadaceae	Aeromonas	Aeromonas caviae	35	273537	4306765	62.07	178647	97.04	0	27
SGB0831	RS-B003_bin21.metabat2	Bacteria	Actinobacteriota	Actinomycetia	Mycobacteriales	Pseudonocardiaceae	Sciscionella	Unassign	859	12238	3269506	70.12	3809	54.02	0	3
SGB0832	RS-B003_bin6.metabat2	Bacteria	Proteobacteria	Alphaproteobacteria	Rhizobiales	Rhizobiaceae	Allorhizobium	Allorhizobium rosettiformans	429	30607	2018749	62.08	4830	51.27	0.13	0
SGB0833	RS-B003_bin9.metabat2	Bacteria	Acidobacteriota	Acidobacteriae	Acidoferrales	UBA7541	Acidoferrum	Unassign	104	216506	4938932	58.95	76909	93.68	4.27	0
SGB0834	RS-B004.bins017.maxbin	Bacteria	Acidobacteriota	Acidobacteriae	Acidobacteriales	SbA1	Gp1-AA133	Unassign	895	107467	7431389	57.23	13712	91.26	8.83	1
SGB0835	RS-B004_bin23.metabat2	Bacteria	Acidobacteriota	Acidobacteriae	Acidoferrales	UBA7541	Acidoferrum	Unassign	183	117727	4417333	61.33	36608	91.33	2.14	0
SGB0836	RS-B004_bin30.metabat2	Bacteria	Firmicutes	Bacilli	Bacillales	Bacillaceae_H	Priestia	Priestia megaterium	292	33235	1478241	38.63	5630	67.23	2.61	0
SGB0837	RS-B004_bin37.metabat2	Bacteria	Actinobacteriota	Thermoleophilia	Solirubrobacterales	1970-09-01	Unassign	Unassign	303	36721	2251515	68.56	9247	83.22	6.35	0
SGB0838	RS-B004_bin39.metabat2	Bacteria	Acidobacteriota	Acidobacteriae	20CM-2-55-15	20CM-2-55-15	DSPE01	Unassign	670	17382	3015837	54.89	4656	55.5	1.71	0
SGB0839	RS-B004_bin7.metabat2	Bacteria	Acidobacteriota	Blastocatellia	Pyrinomonadales	Pyrinomonadaceae	PSRF01	Unassign	595	66723	6629993	54	14372	88.97	4.7	3
SGB0840	RS-B005_bin14.metabat2	Bacteria	Actinobacteriota	Thermoleophilia	Solirubrobacterales	1970-09-01	VAYN01	Unassign	291	59589	2436103	69.5	10883	78.83	3.66	0
SGB0841	RS-B005_bin25.metabat2	Bacteria	Acidobacteriota	Acidobacteriae	Acidobacteriales	Acidobacteriaceae	Edaphobacter	Unassign	656	40303	4094148	57.35	6900	75.96	0.86	0
SGB0842	RS-B005_bin7.metabat2	Bacteria	Proteobacteria	Alphaproteobacteria	Rhizobiales	Rhizobiaceae	Agrobacterium	Unassign	73	386624	4609357	59.81	109215	92.3	0.35	19
SGB0843	RS-B005_bins36.concoct	Bacteria	Bacteroidota	Bacteroidia	Chitinophagales	Chitinophagaceae	Puia	Unassign	1310	16657	5152974	50.89	4225	68.78	2.96	0
SGB0844	RS-B006_bin13.metabat2	Bacteria	Planctomycetota	Planctomycetia	Gemmatales	Gemmataceae	Unassign	Unassign	890	31396	5341476	70.73	7006	81.61	2.61	1
SGB0845	RS-B006_bin17.metabat2	Bacteria	Proteobacteria	Gammaproteobacteria	Enterobacterales	Alteromonadaceae	Pararheinheimera	Unassign	39	353692	4582659	52.26	187273	96.69	0.17	5
SGB0846	RS-B006_bin24.metabat2	Bacteria	Proteobacteria	Gammaproteobacteria	Burkholderiales	Burkholderiaceae	Massilia	Unassign	90	360331	5732389	66.03	117384	97.88	1.52	10
SGB0847	RS-B006_bin30.metabat2	Bacteria	Actinobacteriota	Thermoleophilia	Solirubrobacterales	1970-09-01	VAYN01	Unassign	208	55767	2933339	70.34	19842	88.43	3.59	0
SGB0848	RS-B006_bin35.metabat2	Bacteria	Actinobacteriota	Thermoleophilia	Solirubrobacterales	Solirubrobacteraceae	Unassign	Unassign	457	76428	4163346	72.21	11845	85.38	3.42	20
SGB0849	RS-B006_bin4.metabat2	Bacteria	Proteobacteria	Gammaproteobacteria	Burkholderiales	Burkholderiaceae	Acidovorax	Acidovorax sp005405905	653	37315	4575374	65.59	8526	85.96	0.89	0
SGB0850	RS-B006_bin9.metabat2	Bacteria	Proteobacteria	Alphaproteobacteria	Sphingomonadales	Sphingomonadaceae	Sphingobium	Sphingobium yanoikuyae	103	262310	4334527	64.72	87489	91.23	1.19	8
SGB0851	RS-B006_bins9.concoct	Bacteria	Proteobacteria	Gammaproteobacteria	Burkholderiales	Burkholderiaceae	Mitsuaria	Mitsuaria sp900113225	403	74423	5562372	69.83	17941	92.57	1.46	57
SGB0852	RS-B010.bins018.maxbin	Bacteria	Bacteroidota	Bacteroidia	Flavobacteriales	Flavobacteriaceae	Flavobacterium	Unassign	79	238848	3215772	38.6	107870	99.29	1.42	1
SGB0853	RS-B010_bin16.metabat2	Bacteria	Proteobacteria	Gammaproteobacteria	Burkholderiales	Burkholderiaceae	Pelomonas	Unassign	113	236962	5301345	69.07	74186	92.57	0.47	0
SGB0854	RS-B010_bin41.metabat2	Bacteria	Proteobacteria	Alphaproteobacteria	Micropepsales	Micropepsaceae	Rhizomicrobium	Unassign	494	34544	2878118	63.51	6602	78.75	2.32	0
SGB0855	RS-B010_bins2.concoct	Bacteria	Proteobacteria	Alphaproteobacteria	Sphingomonadales	Sphingomonadaceae	Novosphingobium	Unassign	686	11455	2207388	65.67	3210	51.35	2.01	0
SGB0856	RS-B010_bins20.concoct	Bacteria	Bacteroidota	Bacteroidia	Flavobacteriales	Flavobacteriaceae	Flavobacterium	Flavobacterium sp012270005	546	13598	1997258	42.51	3791	57.86	1.15	0
SGB0857	RS-B010_bins23.concoct	Bacteria	Proteobacteria	Gammaproteobacteria	Pseudomonadales	Pseudomonadaceae	Pseudomonas_A	Pseudomonas_A sp004331835	573	32186	3936615	61.28	8010	62.41	4.31	0
SGB0858	RS-B014.bins016.maxbin	Bacteria	Proteobacteria	Gammaproteobacteria	Steroidobacterales	Steroidobacteraceae	13-2-20CM-66-19	Unassign	170	136858	3222013	63.33	49980	81.65	8.38	6
SGB0859	RS-B014.bins065.maxbin	Bacteria	Acidobacteriota	Thermoanaerobaculia	UBA5704	UBA5704	UBA5704	Unassign	900	53036	6429608	68.09	9773	76.22	2.9	19
SGB0860	RS-B014_bin100.metabat2	Bacteria	Planctomycetota	SZUA-567	H5-PLA8	Unassign	Unassign	Unassign	851	26888	5505034	58.49	7389	67.6	3.23	0
SGB0861	RS-B014_bin102.metabat2	Bacteria	Actinobacteriota	Thermoleophilia	Gaiellales	Gaiellaceae	Unassign	Unassign	373	70016	2357162	69.52	6971	65.86	0	0
SGB0862	RS-B014_bin17.metabat2	Bacteria	Actinobacteriota	Thermoleophilia	Solirubrobacterales	1970-09-01	VAYN01	Unassign	486	51807	3662777	68.97	8846	82.97	4.02	0
SGB0863	RS-B014_bin22.metabat2	Bacteria	Proteobacteria	Gammaproteobacteria	Steroidobacterales	Steroidobacteraceae	FEN-1191	Unassign	133	251084	2764398	64.6	34511	89.22	1.92	0
SGB0864	RS-B014_bin32.metabat2	Bacteria	Bacteroidota	Bacteroidia	Flavobacteriales	Weeksellaceae	Chryseobacterium	Unassign	219	99055	4227326	36.92	28667	99.02	0	6
SGB0865	RS-B014_bin34.metabat2	Bacteria	Proteobacteria	Alphaproteobacteria	Micropepsales	Micropepsaceae	CAIYRG01	Unassign	166	117077	4148661	60.64	38082	91.76	3.04	0
SGB0866	RS-B014_bin38.metabat2	Bacteria	Bacteroidota	Bacteroidia	Chitinophagales	Chitinophagaceae	UTBCD1	Unassign	307	116994	4789398	43.22	24997	94.83	2.48	0
SGB0867	RS-B014_bin43.metabat2	Bacteria	Actinobacteriota	Thermoleophilia	Solirubrobacterales	Solirubrobacteraceae	Baekduia	Unassign	423	47186	3862799	72.24	12900	86.65	2.99	8
SGB0868	RS-B014_bin45.metabat2	Bacteria	Actinobacteriota	Actinomycetia	Mycobacteriales	Mycobacteriaceae	Nocardia	Unassign	880	129739	10326931	68.36	16481	87.88	5.62	152
SGB0869	RS-B014_bin47.metabat2	Bacteria	Proteobacteria	Gammaproteobacteria	Steroidobacterales	Steroidobacteraceae	Unassign	Unassign	269	57421	2423815	64.07	11726	76.21	4.31	31
SGB0870	RS-B014_bin5.metabat2	Bacteria	Proteobacteria	Gammaproteobacteria	Pseudomonadales	Pseudomonadaceae	Pseudomonas_E	Pseudomonas_E monteilii	611	47130	4425439	62.97	8719	53.51	0	9
SGB0871	RS-B014_bin62.metabat2	Bacteria	Proteobacteria	Gammaproteobacteria	Pseudomonadales	Pseudomonadaceae	Pseudomonas_E	Pseudomonas_E atacamensis	615	46287	5136124	60.52	10160	87.15	2.35	15
SGB0872	RS-B014_bin64.metabat2	Bacteria	Chloroflexota	Ktedonobacteria	Ktedonobacterales	Ktedonobacteraceae	Unassign	Unassign	455	28300	3608788	46.73	9163	69.47	0.88	20
SGB0873	RS-B014_bin69.metabat2	Bacteria	Patescibacteria	Saccharimonadia	Saccharimonadales	Unassign	Unassign	Unassign	33	125350	1195861	48.65	48129	66.82	0.93	0
SGB0874	RS-B014_bin7.metabat2	Bacteria	Patescibacteria	Saccharimonadia	Saccharimonadales	UBA2112	Unassign	Unassign	12	205656	1259295	47.68	155269	73.77	0	0
SGB0875	RS-B014_bin75.metabat2	Bacteria	Proteobacteria	Gammaproteobacteria	Burkholderiales	SHXO01	Unassign	Unassign	623	49482	4072857	64.62	7458	78.05	8.59	0
SGB0876	RS-B014_bin78.metabat2	Bacteria	Actinobacteriota	Thermoleophilia	Solirubrobacterales	1970-09-01	VAYN01	Unassign	157	102399	2719131	67.96	25299	96.03	0.99	0
SGB0877	RS-B014_bin8.metabat2	Bacteria	Actinobacteriota	UBA4738	UBA4738	HRBIN12	AC-51	Unassign	369	21167	1991843	70.06	5700	51.21	1.72	0
SGB0878	RS-B014_bin9.metabat2	Bacteria	Gemmatimonadota	Gemmatimonadetes	Gemmatimonadales	GWC2-71-9	Unassign	Unassign	213	123346	2953750	65.91	27636	87.13	1.1	0
SGB0879	RS-B014_bin93.metabat2	Bacteria	Verrucomicrobiota	Verrucomicrobiae	Chthoniobacterales	Chthoniobacteraceae	Unassign	Unassign	257	42825	2298417	58.13	11701	91.05	2.2	3
SGB0880	RS-B014_bin94.metabat2	Bacteria	Patescibacteria	Saccharimonadia	Saccharimonadales	Unassign	Unassign	Unassign	4	227377	600020	48.82	164903	53.45	0	0
SGB0881	RS-B014_bin99.metabat2	Bacteria	Acidobacteriota	Blastocatellia	UBA7656	UBA7656	JADGNW01	Unassign	1055	23147	6094723	56.86	6541	85.45	8.6	2
SGB0882	RS-B014_bins108.concoct	Bacteria	Acidobacteriota	Blastocatellia	Pyrinomonadales	Pyrinomonadaceae	UBA11740	Unassign	602	54834	6015897	56.08	12857	86.18	0.17	1
SGB0883	RS-B014_bins121.concoct	Bacteria	Proteobacteria	Alphaproteobacteria	Sphingomonadales	Sphingomonadaceae	Sphingomicrobium	Unassign	316	28515	1901143	63.11	6678	67.55	3.1	0
SGB0884	RS-B014_bins54.concoct	Bacteria	Actinobacteriota	Acidimicrobiia	IMCC26256	PALSA-610	Unassign	Unassign	557	51030	2846649	65.23	5727	62.46	4.27	0
SGB0885	RS-B014_bins66.concoct	Bacteria	Proteobacteria	Gammaproteobacteria	Pseudomonadales	Pseudomonadaceae	Pseudomonas	Unassign	153	222343	6263072	65.94	71746	95.89	3.26	13
SGB0886	RS-B014_bins80.concoct	Bacteria	Actinobacteriota	Thermoleophilia	Solirubrobacterales	Solirubrobacteraceae	Palsa-465	Unassign	254	118310	4651685	68.28	29101	94.66	2.56	2
SGB0887	RS-B015.bins007.maxbin	Bacteria	Patescibacteria	Saccharimonadia	Saccharimonadales	UBA1547	UBA6022	Unassign	41	69068	858212	47.71	33099	61.97	0.95	0
SGB0888	RS-B015_bins41.concoct	Bacteria	Proteobacteria	Gammaproteobacteria	Burkholderiales	Burkholderiaceae	VBCK01	Unassign	678	29318	3641727	65.22	6018	80.55	1.23	1
SGB0889	RS-B015_bins8.concoct	Bacteria	Proteobacteria	Alphaproteobacteria	Caulobacterales	TH1-2	Terricaulis	Unassign	370	58907	4696783	65.16	16506	89.4	0.84	6
SGB0890	RS-B017_bin29.metabat2	Bacteria	Proteobacteria	Gammaproteobacteria	Steroidobacterales	Steroidobacteraceae	13-2-20CM-66-19	Unassign	202	337789	6402403	63.02	112850	96.38	6.31	15
SGB0891	RS-B017_bin36.metabat2	Bacteria	Elusimicrobiota	Elusimicrobia	UBA1565	UBA9628	GWA2-66-18	Unassign	336	11892	1343672	69.93	4066	52.09	2.35	0
SGB0892	RS-B017_bin6.metabat2	Bacteria	Actinobacteriota	Actinomycetia	Streptosporangiales	Streptosporangiaceae	Trebonia	Unassign	374	188466	7851489	68.68	32784	98.13	1.46	126
SGB0893	RS-B017_bins15.concoct	Bacteria	Proteobacteria	Alphaproteobacteria	Rhizobiales	Labraceae	Labrys	Unassign	1417	25474	6615362	68.77	5225	77.5	4.25	0
SGB0894	RS-B017_bins30.concoct	Bacteria	Proteobacteria	Alphaproteobacteria	Rhizobiales	Rhizobiaceae	Rhizobium	Rhizobium multihospitium	884	38174	6422979	59.79	9181	86.17	3.46	0
SGB0895	RS-B017_bins47.concoct	Bacteria	Proteobacteria	Alphaproteobacteria	Micropepsales	Micropepsaceae	Unassign	Unassign	370	43635	2844792	64.5	10790	87.15	1.96	3
SGB0896	RS-B017_bins53.concoct	Bacteria	Proteobacteria	Gammaproteobacteria	Steroidobacterales	Steroidobacteraceae	13-2-20CM-66-19	Unassign	754	128133	10878352	60.81	22992	87.62	9.25	46
SGB0897	RS-B018.bins003.maxbin	Bacteria	Proteobacteria	Gammaproteobacteria	Pseudomonadales	Moraxellaceae	Acinetobacter	Unassign	132	170573	3193282	41.76	43988	89.72	0.72	10
SGB0898	RS-B018.bins022.maxbin	Bacteria	Proteobacteria	Gammaproteobacteria	Burkholderiales	Rhodocyclaceae	Methyloversatilis	Methyloversatilis discipulorum_A	124	399509	4250926	66.71	105467	95.02	4.72	4
SGB0899	RS-B018_bin35.metabat2	Bacteria	Proteobacteria	Gammaproteobacteria	Pseudomonadales	Moraxellaceae	Acinetobacter	Acinetobacter baumannii	132	89960	3004695	39.09	35341	85.14	0	13
SGB0900	RS-B018_bin58.metabat2	Bacteria	Proteobacteria	Alphaproteobacteria	Sphingomonadales	Sphingomonadaceae	Sphingobium	Sphingobium yanoikuyae	46	408051	3660605	65.13	130409	82.51	0.68	16
SGB0901	RS-B018_bin70.metabat2	Bacteria	Proteobacteria	Alphaproteobacteria	Rhizobiales	Rhizobiaceae	Ensifer	Unassign	77	501319	5413822	62.87	224888	70.24	1.22	2
SGB0902	RS-B018_bin83.metabat2	Bacteria	Bacteroidota	Bacteroidia	Cytophagales	Spirosomaceae	Flectobacillus	Flectobacillus sp009905545	589	79427	4658818	37.41	11024	84.11	1.21	1
SGB0903	RS-B018_bins15.concoct	Bacteria	Proteobacteria	Gammaproteobacteria	Steroidobacterales	Steroidobacteraceae	FEN-1191	Unassign	47	201691	2980040	64.38	104715	93.39	2.29	3
SGB0904	RS-B018_bins4.concoct	Bacteria	Proteobacteria	Gammaproteobacteria	Burkholderiales	Burkholderiaceae	Acidovorax	Acidovorax sp005405905	138	260149	5076202	65.55	62008	95.92	0.76	0
SGB0905	RS-B018_bins44.concoct	Bacteria	Proteobacteria	Gammaproteobacteria	Xanthomonadales	Rhodanobacteraceae	Rudaea	Unassign	719	12986	2584825	63.89	3855	56.62	2.02	0
SGB0906	RS-B018_bins62.concoct	Bacteria	Proteobacteria	Gammaproteobacteria	Burkholderiales	Burkholderiaceae	Comamonas	Comamonas thiooxydans	97	410891	5187852	61.32	115713	98.76	1.08	3
SGB0907	RS-B019_bin19.metabat2	Bacteria	Patescibacteria	Saccharimonadia	Saccharimonadales	UBA4665	Unassign	Unassign	35	187318	1486167	52.25	73361	66.2	0	0
SGB0908	RS-B019_bin28.metabat2	Bacteria	Dormibacterota	Dormibacteria	Dormibacterales	Dormibacteraceae	CF-161	Unassign	742	16237	3246762	70.1	4442	62.59	0	1
SGB0909	RS-B020_bin18.metabat2	Bacteria	Verrucomicrobiota	Verrucomicrobiae	Pedosphaerales	Pedosphaeraceae	Unassign	Unassign	670	19930	3686216	59.83	5921	50.6	0	1
SGB0910	RS-B020_bin2.metabat2	Bacteria	Proteobacteria	Alphaproteobacteria	Rhizobiales	Xanthobacteraceae	Pseudolabrys	Unassign	603	115237	4229248	59.62	8739	64.41	0.95	0
SGB0911	RS-B020_bin32.metabat2	Bacteria	Verrucomicrobiota	Verrucomicrobiae	Chthoniobacterales	UBA10450	AV40	Unassign	362	16568	1592544	55.18	4567	66.71	5	0
SGB0912	RS-B020_bin37.metabat2	Bacteria	Bacteroidota	Bacteroidia	Flavobacteriales	Weeksellaceae	Chryseobacterium	Chryseobacterium sp013153155	144	159339	4208295	35.9	45093	99.02	0	4
SGB0913	RS-B020_bins45.concoct	Bacteria	Actinobacteriota	Thermoleophilia	Solirubrobacterales	Solirubrobacteraceae	Palsa-744	Unassign	218	49583	2574643	66.42	15050	86.5	0.28	105
SGB0914	RS-B020_bins52.concoct	Bacteria	Actinobacteriota	Actinomycetia	Actinomycetales	Microbacteriaceae	Microbacterium	Microbacterium hydrothermale	429	31857	2835580	71.22	7801	70.56	6	1
SGB0915	RS-B021.bins013.maxbin	Bacteria	Verrucomicrobiota	Verrucomicrobiae	Chthoniobacterales	JAFAMB01	Unassign	Unassign	529	176117	4747302	55.65	20786	93.92	8.31	1
SGB0916	RS-B021.bins055.maxbin	Bacteria	Proteobacteria	Alphaproteobacteria	Rhizobiales_A	Rhizobiaceae_A	Ochrobactrum	Ochrobactrum anthropi	630	22182	2875581	57.05	5101	69.92	2.17	0
SGB0917	RS-B021_bin29.metabat2	Bacteria	Proteobacteria	Gammaproteobacteria	Enterobacterales	Enterobacteriaceae	Klebsiella	Klebsiella pneumoniae	279	126329	4473583	58.23	29956	53.06	0	20
SGB0918	RS-B021_bins5.concoct	Bacteria	Bacteroidota	Bacteroidia	Cytophagales	Spirosomaceae	Arsenicibacter	Unassign	1286	25784	4378526	51.8	3493	53.5	1.79	0
SGB0919	RS-B022_bin42.metabat2	Bacteria	Bacteroidota	Bacteroidia	Cytophagales	Spirosomaceae	Emticicia	Unassign	779	41103	5801609	38.42	8879	83.91	0.99	1
SGB0920	RS-B022_bin5.metabat2	Bacteria	Bacteroidota	Bacteroidia	Chitinophagales	Chitinophagaceae	Sediminibacterium	Unassign	107	251409	3810443	39.69	62736	99.48	0	37
SGB0921	RS-B022_bin50.metabat2	Bacteria	Proteobacteria	Gammaproteobacteria	Steroidobacterales	Steroidobacteraceae	13-2-20CM-66-19	Unassign	120	426264	6660186	61.79	112786	94.96	8.19	23
SGB0922	RS-B022_bin59.metabat2	Bacteria	Proteobacteria	Gammaproteobacteria	Burkholderiales	Burkholderiaceae	Pelomonas	Unassign	301	108844	6019247	69.32	33162	80.34	2.59	4
SGB0923	RS-B022_bin63.metabat2	Bacteria	Proteobacteria	Gammaproteobacteria	Burkholderiales	Burkholderiaceae	Pelomonas	Pelomonas puraquae	665	83373	5243899	68.91	9860	66.21	1.72	1
SGB0924	RS-B022_bin9.metabat2	Bacteria	Bacteroidota	Bacteroidia	Flavobacteriales	Crocinitomicaceae	Fluviicola	Unassign	27	770196	4491369	44.24	299740	100	0	6
SGB0925	RS-B022_bins13.concoct	Bacteria	Proteobacteria	Gammaproteobacteria	Burkholderiales	Burkholderiaceae	Acidovorax	Acidovorax delafieldii	456	71126	4094905	65.05	11534	75.76	3.2	0
SGB0926	RS-B022_bins52.concoct	Bacteria	Proteobacteria	Alphaproteobacteria	Sphingomonadales	Sphingomonadaceae	Sphingobium	Sphingobium yanoikuyae	710	15916	2410517	65.18	3364	55.02	2.1	0
SGB0927	RS-B023_bin1.metabat2	Bacteria	Proteobacteria	Alphaproteobacteria	Rhizobiales	Beijerinckiaceae	Methylobacterium	Unassign	750	57674	4289717	69.29	6418	82.85	3.76	0
SGB0928	RS-B023_bin24.metabat2	Bacteria	Verrucomicrobiota	Verrucomicrobiae	Chthoniobacterales	UBA10450	AV40	Unassign	313	21768	1781035	55.35	6403	66.67	4.39	0
SGB0929	RS-B023_bins24.concoct	Bacteria	Proteobacteria	Alphaproteobacteria	Dongiales	Dongiaceae	Unassign	Unassign	904	13441	3148704	66.42	3615	56.03	2.18	0
SGB0930	RS-B023_bins41.concoct	Bacteria	Proteobacteria	Gammaproteobacteria	Burkholderiales	Burkholderiaceae	VBCK01	Unassign	671	14166	2535324	65.48	4026	53.79	1.72	0
SGB0931	RS-B023_bins51.concoct	Bacteria	Proteobacteria	Gammaproteobacteria	Steroidobacterales	Steroidobacteraceae	13-2-20CM-66-19	Unassign	329	70838	3836632	67.48	15807	84.22	2.39	0
SGB0932	RS-B023_bins56.concoct	Bacteria	Dependentiae	Babeliae	Babeliales	Vermiphilaceae	SOIL31	Unassign	190	21793	939074	29.95	5592	50.7	0.41	0
SGB0933	RS-B024.bins002.maxbin	Bacteria	Proteobacteria	Gammaproteobacteria	Steroidobacterales	Steroidobacteraceae	FEN-1191	Unassign	82	139977	2626356	67.81	52514	70.54	1.21	0
SGB0934	RS-B024.bins056.maxbin	Bacteria	Verrucomicrobiota	Verrucomicrobiae	Opitutales	Opitutaceae	Unassign	Unassign	54	380145	2860317	60.24	103480	90.96	2.05	1
SGB0935	RS-B024.bins068.maxbin	Bacteria	Verrucomicrobiota	Verrucomicrobiae	Opitutales	Opitutaceae	Lacunisphaera	Unassign	270	187969	4332567	64.41	65810	71.23	5.09	0
SGB0936	RS-B024.bins073.maxbin	Bacteria	Proteobacteria	Alphaproteobacteria	Micropepsales	Micropepsaceae	Unassign	Unassign	62	335019	2527946	65.88	93360	89.96	3.19	9
SGB0937	RS-B024.bins127.maxbin	Bacteria	Acidobacteriota	Vicinamibacteria	Vicinamibacterales	Unassign	Unassign	Unassign	172	172602	3626034	65.05	50167	56.9	3.45	2
SGB0938	RS-B024.bins227.maxbin	Bacteria	Armatimonadota	Fimbriimonadia	Fimbriimonadales	Fimbriimonadaceae	55-13	Unassign	290	100090	3927469	61.73	25200	80.45	9.72	0
SGB0939	RS-B024.bins280.maxbin	Bacteria	Eisenbacteria	RBG-16-71-46	RBG-16-71-46	RBG-16-71-46	DSQF01	Unassign	384	26874	2056302	70.04	6570	53.45	0	0
SGB0940	RS-B024_bin1.metabat2	Bacteria	Eisenbacteria	RBG-16-71-46	RBG-16-71-46	Unassign	Unassign	Unassign	119	100544	3600611	71.27	46173	84.48	0	0
SGB0941	RS-B024_bin100.metabat2	Bacteria	Acidobacteriota	Vicinamibacteria	Vicinamibacterales	UBA2999	Gp6-AA45	Unassign	628	56849	4819312	67.46	9484	51.21	3.45	0
SGB0942	RS-B024_bin101.metabat2	Bacteria	Patescibacteria	Paceibacteria	UBA9983_A	SBAW01	GWA1-54-10	Unassign	15	211893	705890	53.84	78469	60.09	0.85	0
SGB0943	RS-B024_bin104.metabat2	Bacteria	Verrucomicrobiota	Verrucomicrobiae	Pedosphaerales	SXQI01	Unassign	Unassign	323	92172	5550440	54.22	24286	93.06	0.81	0
SGB0944	RS-B024_bin115.metabat2	Bacteria	FCPU426	Palsa-1180	Palsa-1180	Palsa-1180	PALSA-1180	Unassign	287	24744	1807892	60.87	7288	52.73	0	0
SGB0945	RS-B024_bin116.metabat2	Bacteria	Proteobacteria	Gammaproteobacteria	Steroidobacterales	Steroidobacteraceae	CAILZL01	Unassign	61	300146	3833702	60.75	114048	95.92	6.64	54
SGB0946	RS-B024_bin117.metabat2	Bacteria	Elusimicrobiota	Elusimicrobia	UBA1565	UBA9628	GWA2-66-18	Unassign	467	36243	2639404	71.61	6431	51.9	2.87	0
SGB0947	RS-B024_bin128.metabat2	Bacteria	Proteobacteria	Gammaproteobacteria	Steroidobacterales	Steroidobacteraceae	CAILZL01	Unassign	63	365954	3915831	57.66	99063	68.97	0	3
SGB0948	RS-B024_bin142.metabat2	Bacteria	Acidobacteriota	Thermoanaerobaculia	Gp7-AA8	Gp7-AA8	QHVT01	Unassign	294	72320	5057120	63.68	25927	91.93	5.13	2
SGB0949	RS-B024_bin145.metabat2	Bacteria	Patescibacteria	Doudnabacteria	UBA920	O2-02-FULL-48-8	Unassign	Unassign	9	144944	872895	40.79	117821	69.31	0	0
SGB0950	RS-B024_bin147.metabat2	Bacteria	Acidobacteriota	Acidobacteriae	Acidobacteriales	SbA1	Unassign	Unassign	381	85063	5743973	55.96	26407	87.1	2.74	1
SGB0951	RS-B024_bin15.metabat2	Bacteria	Bdellovibrionota	Bdellovibrionia_A	UBA1018	UBA1018	Unassign	Unassign	141	173449	3941326	58.27	39279	91.07	0.89	0
SGB0952	RS-B024_bin152.metabat2	Bacteria	Proteobacteria	Alphaproteobacteria	Micropepsales	Micropepsaceae	Rhizomicrobium	Unassign	107	283764	3693556	60.85	77965	96	2.78	1
SGB0953	RS-B024_bin160.metabat2	Bacteria	Acidobacteriota	Acidobacteriae	Bryobacterales	Bryobacteraceae	Palsa-187	Unassign	112	202315	4621702	60.67	66646	91.89	0.88	1
SGB0954	RS-B024_bin161.metabat2	Bacteria	Actinobacteriota	Actinomycetia	Actinomycetales	Microbacteriaceae	Rhodoglobus	Rhodoglobus sp001725325	245	58775	2679972	70.79	15267	89.56	1.87	7
SGB0955	RS-B024_bin165.metabat2	Bacteria	Bacteroidota	Bacteroidia	Cytophagales	Cyclobacteriaceae	ELB16-189	Unassign	289	123049	4667413	45.97	22990	95.08	3.55	1
SGB0956	RS-B024_bin181.metabat2	Bacteria	Proteobacteria	Alphaproteobacteria	Rickettsiales	JABCZZ01	JABCZZ01	Unassign	35	225350	2265166	53.37	117557	98.9	1.1	0
SGB0957	RS-B024_bin182.metabat2	Bacteria	Verrucomicrobiota	Verrucomicrobiae	Pedosphaerales	UBA11358	Unassign	Unassign	300	52155	3450705	57.37	16906	86.06	8.7	5
SGB0958	RS-B024_bin184.metabat2	Bacteria	Proteobacteria	Gammaproteobacteria	Steroidobacterales	Steroidobacteraceae	CAIUGU01	Unassign	246	63936	2744313	62.75	17020	79.77	2.66	0
SGB0959	RS-B024_bin187.metabat2	Bacteria	Acidobacteriota	Vicinamibacteria	Vicinamibacterales	UBA2999	2-12-FULL-65-11	Unassign	211	128162	5193148	63.8	47427	68.97	1.72	25
SGB0960	RS-B024_bin192.metabat2	Bacteria	Proteobacteria	Gammaproteobacteria	Pseudomonadales	Moraxellaceae	Acinetobacter	Acinetobacter junii	254	47195	2915803	38.68	16267	77.07	0.86	4
SGB0961	RS-B024_bin194.metabat2	Bacteria	Proteobacteria	Alphaproteobacteria	Rhizobiales	Xanthobacteraceae	Pseudolabrys	Unassign	249	71705	2232970	61.26	12828	55.92	2.4	0
SGB0962	RS-B024_bin197.metabat2	Bacteria	Proteobacteria	Gammaproteobacteria	Burkholderiales	Methylophilaceae	Methylophilus	Unassign	21	398137	2787611	49.66	263688	99.15	0	0
SGB0963	RS-B024_bin201.metabat2	Bacteria	Proteobacteria	Alphaproteobacteria	Sphingomonadales	Sphingomonadaceae	Novosphingobium	Unassign	815	31008	4442365	64.61	5914	54.31	5	0
SGB0964	RS-B024_bin202.metabat2	Bacteria	Planctomycetota	UBA1135	UBA1135	GCA-002686595	JACRIN01	Unassign	496	49881	4925177	63.24	13322	93.06	6.01	0
SGB0965	RS-B024_bin208.metabat2	Bacteria	Proteobacteria	Alphaproteobacteria	Caulobacterales	Caulobacteraceae	NCED01	Unassign	460	54857	3065346	71.35	8007	72.18	4.17	0
SGB0966	RS-B024_bin21.metabat2	Bacteria	Actinobacteriota	Actinomycetia	Actinomycetales	Microbacteriaceae	Microbacterium	Microbacterium sp003293595	106	186284	3134110	69.71	54764	97	2.79	3
SGB0967	RS-B024_bin214.metabat2	Bacteria	Patescibacteria	Paceibacteria	UBA9983_A	Unassign	Unassign	Unassign	20	74010	555442	41.86	40701	61.07	0	0
SGB0968	RS-B024_bin215.metabat2	Bacteria	Acidobacteriota	Acidobacteriae	Bryobacterales	Bryobacteraceae	BOG-234	Unassign	134	233827	5116175	60.39	61407	91.43	3.26	2
SGB0969	RS-B024_bin218.metabat2	Bacteria	Bacteroidota	Bacteroidia	Chitinophagales	Chitinophagaceae	JAFDYH01	Unassign	525	62467	5608861	41.6	13918	89.77	3.8	6
SGB0970	RS-B024_bin219.metabat2	Bacteria	Acidobacteriota	Thermoanaerobaculia	Gp7-AA8	Gp7-AA8	QHVT01	Unassign	661	54011	4373544	63.75	8006	62.07	3.45	0
SGB0971	RS-B024_bin220.metabat2	Bacteria	Myxococcota	Myxococcia	Myxococcales	Myxococcaceae	Unassign	Unassign	89	331596	7023042	66.04	116699	92.9	2.9	6
SGB0972	RS-B024_bin222.metabat2	Bacteria	Proteobacteria	Alphaproteobacteria	Micropepsales	Micropepsaceae	CAIYRG01	Unassign	282	83064	3834100	59.99	21848	86.25	6.06	3
SGB0973	RS-B024_bin230.metabat2	Bacteria	Acidobacteriota	Acidobacteriae	Bryobacterales	Bryobacteraceae	Palsa-187	Unassign	381	72283	3902004	62.04	13857	92.16	5.17	2
SGB0974	RS-B024_bin231.metabat2	Bacteria	Proteobacteria	Gammaproteobacteria	Legionellales	Legionellaceae	Legionella	Legionella rowbothamii	16	396757	2662765	39.91	281315	89.69	0.38	3
SGB0975	RS-B024_bin233.metabat2	Bacteria	Proteobacteria	Alphaproteobacteria	Micavibrionales	Micavibrionaceae	JACQIJ01	Unassign	286	40646	2430522	59.64	10317	79.1	3.7	0
SGB0976	RS-B024_bin24.metabat2	Bacteria	Proteobacteria	Gammaproteobacteria	Steroidobacterales	Steroidobacteraceae	CAILZL01	Unassign	181	148287	4030617	54.31	33329	82.76	0	3
SGB0977	RS-B024_bin242.metabat2	Bacteria	Verrucomicrobiota	Verrucomicrobiae	Pedosphaerales	UBA11358	UBA11358	Unassign	297	48078	3108533	58.16	13196	88.72	6.42	0
SGB0978	RS-B024_bin244.metabat2	Bacteria	Actinobacteriota	Acidimicrobiia	Acidimicrobiales	AC-14	Unassign	Unassign	253	38018	2001898	73.06	10129	74.51	2.88	3
SGB0979	RS-B024_bin246.metabat2	Bacteria	Actinobacteriota	Thermoleophilia	Solirubrobacterales	1970-09-01	VAYN01	Unassign	372	101640	3409514	70.57	12164	83.76	9.54	0
SGB0980	RS-B024_bin247.metabat2	Bacteria	Chloroflexota	Ktedonobacteria	Ktedonobacterales	Ktedonobacteraceae	Unassign	Unassign	217	133383	5193993	46.89	34483	98.68	3.47	74
SGB0981	RS-B024_bin251.metabat2	Bacteria	Proteobacteria	Gammaproteobacteria	Steroidobacterales	Steroidobacteraceae	FEN-1191	Unassign	76	147769	3291130	67.21	62920	90.94	4.9	0
SGB0982	RS-B024_bin256.metabat2	Bacteria	Verrucomicrobiota	Verrucomicrobiae	Opitutales	Opitutaceae	Unassign	Unassign	322	31610	2168189	63.39	7995	74.07	4.11	0
SGB0983	RS-B024_bin258.metabat2	Bacteria	Verrucomicrobiota	Verrucomicrobiae	Methylacidiphilales	UBA1321	JABDGH01	Unassign	195	55460	2590268	58.66	17863	83.21	2.36	0
SGB0984	RS-B024_bin264.metabat2	Bacteria	Planctomycetota	Planctomycetia	Gemmatales	Gemmataceae	Unassign	Unassign	1262	24379	6140492	65.76	5105	54.26	1.4	0
SGB0985	RS-B024_bin267.metabat2	Bacteria	Patescibacteria	Paceibacteria	UBA9983_A	SBAW01	GWA1-54-10	Unassign	30	82058	659102	50.73	27030	76.71	0	0
SGB0986	RS-B024_bin275.metabat2	Bacteria	Bacteroidota	Bacteroidia	Flavobacteriales	PHOS-HE28	PHOS-HE28	Unassign	48	313378	3912185	62.31	118580	99.46	0.18	1
SGB0987	RS-B024_bin279.metabat2	Bacteria	Acidobacteriota	Vicinamibacteria	Vicinamibacterales	Unassign	Unassign	Unassign	87	234498	3427284	64.53	70265	53.45	0	0
SGB0988	RS-B024_bin284.metabat2	Bacteria	Bacteroidota	Bacteroidia	Chitinophagales	Chitinophagaceae	Puia	Unassign	563	19215	2545756	38.33	4695	50.12	0.49	0
SGB0989	RS-B024_bin285.metabat2	Bacteria	Planctomycetota	Phycisphaerae	Tepidisphaerales	Tepidisphaeraceae	Unassign	Unassign	438	76377	5404352	56.42	17354	91.48	6.82	0
SGB0990	RS-B024_bin286.metabat2	Bacteria	Actinobacteriota	Actinomycetia	Mycobacteriales	Mycobacteriaceae	Mycobacterium	Unassign	150	248732	5815651	65.14	64605	97.99	4.83	38
SGB0991	RS-B024_bin3.metabat2	Bacteria	Acidobacteriota	Acidobacteriae	Bryobacterales	Bryobacteraceae	BOG-234	Unassign	65	345051	5454017	60.48	122570	97.1	4.58	1
SGB0992	RS-B024_bin32.metabat2	Bacteria	Bacteroidota	Bacteroidia	Sphingobacteriales	Sphingobacteriaceae	Mucilaginibacter	Unassign	525	31721	4008615	41.8	9451	54.62	3.45	4
SGB0993	RS-B024_bin40.metabat2	Bacteria	Acidobacteriota	Acidobacteriae	Acidobacteriales	Acidobacteriaceae	Terracidiphilus	Unassign	696	61710	6190666	59.85	11788	71.03	8.62	58
SGB0994	RS-B024_bin53.metabat2	Bacteria	Proteobacteria	Gammaproteobacteria	Enterobacterales	Enterobacteriaceae	Enterobacter	Enterobacter kobei	84	178184	2748287	55.98	54370	50	1.75	22
SGB0995	RS-B024_bin58.metabat2	Bacteria	Acidobacteriota	Acidobacteriae	Acidobacteriales	Acidobacteriaceae	Terracidiphilus	Unassign	475	107432	5452101	57.43	15704	73.32	3.02	2
SGB0996	RS-B024_bin6.metabat2	Bacteria	Myxococcota	Polyangia	Polyangiales	Polyangiaceae	Unassign	Unassign	1075	57649	6965629	66.51	7614	67.3	3.39	0
SGB0997	RS-B024_bin75.metabat2	Bacteria	Actinobacteriota	Actinomycetia	Mycobacteriales	Pseudonocardiaceae	Amycolatopsis	Unassign	1232	86739	8030261	68.83	7444	70.17	8.62	83
SGB0998	RS-B024_bin81.metabat2	Bacteria	Verrucomicrobiota	Verrucomicrobiae	Pedosphaerales	DSYF01	DSYF01	Unassign	465	119824	7318485	57	22880	83.74	3.04	0
SGB0999	RS-B024_bin83.metabat2	Bacteria	Actinobacteriota	Actinomycetia	Mycobacteriales	Mycobacteriaceae	Mycobacterium	Unassign	475	70837	4612479	67.52	13829	66.99	4.53	34
SGB1000	RS-B024_bin87.metabat2	Bacteria	Proteobacteria	Gammaproteobacteria	Steroidobacterales	Steroidobacteraceae	Bog-1198	Unassign	333	115999	5377200	62.6	25965	87.48	4.83	6
SGB1001	RS-B024_bin90.metabat2	Bacteria	Planctomycetota	Planctomycetia	Planctomycetales	Planctomycetaceae	Schlesneria	Unassign	1165	28061	7750171	54.73	7607	74.88	1.94	0
SGB1002	RS-B024_bin96.metabat2	Bacteria	Proteobacteria	Alphaproteobacteria	Micropepsales	Micropepsaceae	Rhizomicrobium	Unassign	339	76905	3465964	65.94	14022	83.82	4.88	0
SGB1003	RS-B024_bin98.metabat2	Bacteria	Proteobacteria	Alphaproteobacteria	Rhizobiales	Hyphomicrobiaceae	JABFRJ01	Unassign	228	138866	4466490	60.36	37009	84.57	1.99	1
SGB1004	RS-B024_bins110.concoct	Bacteria	Actinobacteriota	Actinomycetia	Mycobacteriales	Pseudonocardiaceae	GCA-003244245	Unassign	245	122224	4613423	66.62	27243	93.44	1.08	34
SGB1005	RS-B024_bins144.concoct	Bacteria	Verrucomicrobiota	Verrucomicrobiae	Pedosphaerales	SIBH01	Unassign	Unassign	451	48424	4335517	57.06	12439	79.01	4.56	1
SGB1006	RS-B024_bins165.concoct	Bacteria	Cyanobacteria	Vampirovibrionia	Obscuribacterales	Obscuribacteraceae	QKMZ01	Unassign	1067	11755	3577229	50.31	3396	62.93	1.52	0
SGB1007	RS-B024_bins203.concoct	Bacteria	Myxococcota	Polyangia	Haliangiales	Haliangiaceae	Unassign	Unassign	559	34626	5194556	70.87	10343	55.69	0.22	0
SGB1008	RS-B024_bins31.concoct	Bacteria	Nitrospirota	Nitrospiria	Nitrospirales	Nitrospiraceae	Palsa-1315	Unassign	251	175948	3164837	54.7	16790	93.12	2.27	0
SGB1009	RS-B025_bin10.metabat2	Bacteria	Actinobacteriota	Thermoleophilia	Gaiellales	Gaiellaceae	Unassign	Unassign	206	49978	2091173	67.03	14749	86.03	1.83	0
SGB1010	RS-B025_bin19.metabat2	Bacteria	Proteobacteria	Alphaproteobacteria	Rhizobiales	Methyloligellaceae	Methyloceanibacter	Unassign	387	21191	2074392	65.4	6065	74.82	4.38	0
SGB1011	RS-B025_bin20.metabat2	Bacteria	Actinobacteriota	Actinomycetia	Actinomycetales	Microbacteriaceae	Microbacterium	Unassign	156	62669	2116694	71.05	18278	96.89	1.95	19
SGB1012	RS-B025_bin24.metabat2	Bacteria	Acidobacteriota	Blastocatellia	Pyrinomonadales	Pyrinomonadaceae	PSRF01	Unassign	872	20399	4360589	55.84	5328	64.03	4.24	0
SGB1013	RS-B025_bin6.metabat2	Bacteria	Actinobacteriota	Actinomycetia	Mycobacteriales	Mycobacteriaceae	Mycobacterium	Unassign	523	84557	5592659	64.01	15536	75.4	4.13	17
SGB1014	RS-B025_bin7.metabat2	Bacteria	Bacteroidota	Bacteroidia	Chitinophagales	Chitinophagaceae	VBAS01	Unassign	524	44570	4276160	38.03	10255	91.41	1.35	0
SGB1015	RS-B025_bins27.concoct	Bacteria	Actinobacteriota	Acidimicrobiia	IMCC26256	PALSA-555	CAIUKV01	Unassign	221	88513	2697818	70.78	14829	71.55	1.72	0
SGB1016	RS-B025_bins36.concoct	Bacteria	Verrucomicrobiota	Verrucomicrobiae	Chthoniobacterales	UBA10450	AV40	Unassign	506	14436	1529511	55.36	2928	62.98	4.07	0
SGB1017	RS-B025_bins37.concoct	Bacteria	Acidobacteriota	Acidobacteriae	Bryobacterales	Bryobacteraceae	Palsa-187	Unassign	422	63868	4356482	61.33	13429	88.14	2.17	0
SGB1018	RS-B025_bins6.concoct	Bacteria	Chloroflexota	Limnocylindria	Limnocylindrales	CSP1-4	SPCO01	Unassign	352	23318	2450684	68.89	7785	61.35	3.45	0
SGB1019	RS-B028_bin14.metabat2	Bacteria	Proteobacteria	Gammaproteobacteria	Burkholderiales	Burkholderiaceae	JAEUPI01	Unassign	697	26790	3782535	69.29	6027	68.57	3.16	0
SGB1020	RS-B028_bin24.metabat2	Bacteria	Proteobacteria	Gammaproteobacteria	Steroidobacterales	Steroidobacteraceae	Povalibacter	Unassign	1103	18324	5266548	61.47	4990	71.15	6.8	23
SGB1021	RS-B028_bin26.metabat2	Bacteria	Proteobacteria	Gammaproteobacteria	Pseudomonadales	Spongiibacteraceae	Unassign	Unassign	479	16919	2403164	53.79	5249	65.17	1.39	0
SGB1022	RS-B028_bin3.metabat2	Bacteria	Acidobacteriota	Mor1	Gp22-AA2	AA152	AA152	Unassign	444	66464	4642142	65.37	14108	92.34	4.33	8
SGB1023	RS-B028_bin31.metabat2	Bacteria	Proteobacteria	Alphaproteobacteria	Caulobacterales	Caulobacteraceae	Phenylobacterium	Unassign	491	36648	3300830	69.22	8133	79.95	2.61	0
SGB1024	RS-B028_bin34.metabat2	Bacteria	Myxococcota	Polyangia	Haliangiales	Haliangiaceae	JABFXX01	Unassign	1867	68165	9276143	70.12	5158	53.38	2.58	0
SGB1025	RS-B028_bin8.metabat2	Bacteria	Proteobacteria	Alphaproteobacteria	Sphingomonadales	Sphingomonadaceae	Sphingobium	Unassign	91	143960	2857316	61.01	51502	96.75	0.7	7
SGB1026	RS-B028_bin9.metabat2	Bacteria	Patescibacteria	Saccharimonadia	Saccharimonadales	Unassign	Unassign	Unassign	31	97035	894801	45.9	49683	57.83	2.56	0
SGB1027	RS-B028_bins43.concoct	Bacteria	Proteobacteria	Gammaproteobacteria	Steroidobacterales	Steroidobacteraceae	Unassign	Unassign	667	45213	5384089	62.53	10029	83.14	6.6	4
SGB1028	RS-B028_bins63.concoct	Bacteria	Proteobacteria	Alphaproteobacteria	Caulobacterales	Hyphomonadaceae	UBA7672	Unassign	667	36609	3762710	65.67	6693	78.78	1.88	0
SGB1029	RS-B028_bins71.concoct	Bacteria	Actinobacteriota	Actinomycetia	Mycobacteriales	HKI-0501	Fodinicola	Unassign	691	87188	9041803	67.59	17736	68.89	1.71	152
SGB1030	RS-B029_bin12.metabat2	Bacteria	Acidobacteriota	Acidobacteriae	Bryobacterales	Bryobacteraceae	Palsa-187	Unassign	255	63410	3375377	59.58	21720	84.01	7.17	0
SGB1031	RS-B029_bin8.metabat2	Bacteria	Proteobacteria	Gammaproteobacteria	Steroidobacterales	Steroidobacteraceae	CAILZL01	Unassign	418	12903	1839103	55.64	4590	51.53	1.33	0
SGB1032	RS-B031.bins039.maxbin	Bacteria	Proteobacteria	Gammaproteobacteria	Unassign	Unassign	Unassign	Unassign	826	29487	2446766	69.43	2803	65.81	0.85	0
SGB1033	RS-B031_bin10.metabat2	Bacteria	Chloroflexota	Limnocylindria	QHBO01	QHBO01	Unassign	Unassign	218	25854	1333043	70.58	7260	59.88	0	0
SGB1034	RS-B031_bin27.metabat2	Bacteria	Patescibacteria	Saccharimonadia	Saccharimonadales	UBA4665	PMNU01	Unassign	22	141465	1168860	53.73	70622	65.81	0	0
SGB1035	RS-B031_bin34.metabat2	Bacteria	Proteobacteria	Alphaproteobacteria	Caulobacterales	Caulobacteraceae	NCED01	Unassign	272	45292	2792116	70.82	14346	85.67	1.84	0
SGB1036	RS-B031_bin42.metabat2	Bacteria	Proteobacteria	Alphaproteobacteria	Sphingomonadales	Sphingomonadaceae	Chakrabartia	Unassign	100	164300	3303657	63.46	61455	90.14	2.1	10
SGB1037	RS-B031_bin45.metabat2	Bacteria	Bacteroidota	Bacteroidia	Chitinophagales	Chitinophagaceae	UTBCD1	Unassign	677	19643	3147922	41.94	4792	52.9	3.45	0
SGB1038	RS-B031_bin47.metabat2	Bacteria	Proteobacteria	Alphaproteobacteria	Rhizobiales	Rhizobiaceae	Pararhizobium	Unassign	101	104623	2513049	62.07	37757	56.9	0	0
SGB1039	RS-B031_bin51.metabat2	Bacteria	Proteobacteria	Gammaproteobacteria	Burkholderiales	SHXO01	Unassign	Unassign	290	56261	2821158	66.5	12622	80.44	1.9	0
SGB1040	RS-B031_bin54.metabat2	Bacteria	Proteobacteria	Gammaproteobacteria	Pseudomonadales	Moraxellaceae	Acinetobacter	Acinetobacter johnsonii	105	160082	3034649	41.56	43349	97.26	0.31	14
SGB1041	RS-B031_bin60.metabat2	Bacteria	Proteobacteria	Alphaproteobacteria	Rhizobiales	Devosiaceae	Devosia_A	Unassign	399	38563	2673647	62.4	8212	65.74	0.49	0
SGB1042	RS-B031_bin61.metabat2	Bacteria	Actinobacteriota	Actinomycetia	Actinomycetales	Microbacteriaceae	Microbacterium	Unassign	235	70635	3504481	69.46	19757	92.91	1.04	3
SGB1043	RS-B031_bin65.metabat2	Bacteria	Patescibacteria	Saccharimonadia	Saccharimonadales	UBA4665	PMNU01	Unassign	108	18996	654656	52.87	6511	51.21	0	0
SGB1044	RS-B031_bin67.metabat2	Bacteria	Proteobacteria	Gammaproteobacteria	Burkholderiales	Burkholderiaceae	Variovorax	Unassign	1109	118948	7030869	68.94	7326	79.54	9.18	0
SGB1045	RS-B031_bins17.concoct	Bacteria	Proteobacteria	Gammaproteobacteria	Burkholderiales	Burkholderiaceae	DSNY01	Unassign	811	20506	3466538	64.2	4573	60.19	1.54	0
SGB1046	RS-B031_bins3.concoct	Bacteria	Proteobacteria	Gammaproteobacteria	Burkholderiales	Burkholderiaceae	Piscinibacter	Unassign	568	41686	4463538	71.21	9098	73.55	2.39	0
SGB1047	RS-B032_bin11.metabat2	Bacteria	Acidobacteriota	Thermoanaerobaculia	UBA5066	UBA5066	Unassign	Unassign	531	27284	3328065	70.89	7062	61.97	2.14	3
SGB1048	RS-B032_bin112.metabat2	Bacteria	Patescibacteria	Paceibacteria	UBA9983_A	UBA2100	UBA10103	Unassign	51	37268	692616	57.3	16387	67.92	0	0
SGB1049	RS-B032_bin116.metabat2	Bacteria	Proteobacteria	Gammaproteobacteria	Steroidobacterales	Steroidobacteraceae	Bog-1198	Unassign	218	57925	2110771	65.68	12902	52.05	0	1
SGB1050	RS-B032_bin117.metabat2	Bacteria	Actinobacteriota	Thermoleophilia	Solirubrobacterales	1970-09-01	Unassign	Unassign	201	88872	2268066	69.54	15135	88.54	3.02	0
SGB1051	RS-B032_bin118.metabat2	Bacteria	Planctomycetota	Phycisphaerae	WQYP01	WQYP01	WQYP01	Unassign	344	55784	4166071	58.52	16392	85.23	0.07	0
SGB1052	RS-B032_bin120.metabat2	Bacteria	Verrucomicrobiota	Verrucomicrobiae	Pedosphaerales	Unassign	Unassign	Unassign	292	34212	2342078	59.9	9899	57.2	1.01	0
SGB1053	RS-B032_bin126.metabat2	Bacteria	Gemmatimonadota	Gemmatimonadetes	Gemmatimonadales	GWC2-71-9	JACDDX01	Unassign	463	53879	3650460	69.98	10475	77.7	3.85	0
SGB1054	RS-B032_bin129.metabat2	Bacteria	Desulfobacterota_B	Binatia	UBA9968	UBA9968	Unassign	Unassign	454	24962	2492064	53.64	5592	60.21	1.63	3
SGB1055	RS-B032_bin139.metabat2	Bacteria	Acidobacteriota	Blastocatellia	Pyrinomonadales	Pyrinomonadaceae	PSRF01	Unassign	515	115426	5963285	55.93	14963	69.08	3.45	47
SGB1056	RS-B032_bin141.metabat2	Bacteria	Actinobacteriota	Thermoleophilia	Gaiellales	Unassign	Unassign	Unassign	516	31451	2744563	68.12	5903	77.47	5.17	0
SGB1057	RS-B032_bin143.metabat2	Bacteria	Proteobacteria	Alphaproteobacteria	Micropepsales	Micropepsaceae	Rhizomicrobium	Unassign	301	74045	2288048	61.79	9771	71.63	9.56	1
SGB1058	RS-B032_bin15.metabat2	Bacteria	Acidobacteriota	Acidobacteriae	Bryobacterales	Bryobacteraceae	Palsa-187	Unassign	75	348113	4183419	53.19	106262	95.65	3.48	1
SGB1059	RS-B032_bin152.metabat2	Bacteria	Actinobacteriota	Actinomycetia	Propionibacteriales	Nocardioidaceae	Nocardioides	Unassign	242	102342	4445346	72.98	28184	93.78	3.71	7
SGB1060	RS-B032_bin156.metabat2	Bacteria	Acidobacteriota	Acidobacteriae	Acidobacteriales	SbA1	Gp1-AA145	Unassign	338	376680	6920623	55.83	62580	98.58	2.14	6
SGB1061	RS-B032_bin157.metabat2	Bacteria	Acidobacteriota	Acidobacteriae	Bryobacterales	Bryobacteraceae	Palsa-187	Unassign	110	194560	3823423	59.74	64470	69.95	1.74	1
SGB1062	RS-B032_bin174.metabat2	Bacteria	Acidobacteriota	Thermoanaerobaculia	Gp7-AA8	Gp7-AA8	QHVT01	Unassign	313	188240	6605129	65.35	30460	97.82	3.04	2
SGB1063	RS-B032_bin182.metabat2	Bacteria	Acidobacteriota	Blastocatellia	Pyrinomonadales	Pyrinomonadaceae	PSRF01	Unassign	101	460138	6617302	56.11	119172	87.93	1.71	37
SGB1064	RS-B032_bin183.metabat2	Bacteria	Verrucomicrobiota	Verrucomicrobiae	Chthoniobacterales	Unassign	Unassign	Unassign	457	16489	2028750	61.44	4606	51.72	3.45	0
SGB1065	RS-B032_bin186.metabat2	Bacteria	Actinobacteriota	Thermoleophilia	Solirubrobacterales	Solirubrobacteraceae	Palsa-465	Unassign	257	63125	2915733	66.94	16604	89.1	1.71	2
SGB1066	RS-B032_bin19.metabat2	Bacteria	Proteobacteria	Alphaproteobacteria	Caulobacterales	TH1-2	Terricaulis	Unassign	390	44190	3257222	65.29	10827	81.93	5.88	0
SGB1067	RS-B032_bin198.metabat2	Bacteria	Patescibacteria	Saccharimonadia	Saccharimonadales	UBA4665	RGVC01	Unassign	34	74910	761637	51.25	30729	56.82	0	0
SGB1068	RS-B032_bin20.metabat2	Bacteria	Proteobacteria	Gammaproteobacteria	Burkholderiales	Burkholderiaceae	Kinneretia	Unassign	481	39572	4297463	69.51	11187	59.48	0	0
SGB1069	RS-B032_bin210.metabat2	Bacteria	Proteobacteria	Gammaproteobacteria	Steroidobacterales	Steroidobacteraceae	FEN-1191	Unassign	236	48783	2707001	65.76	15822	83.6	2.79	0
SGB1070	RS-B032_bin224.metabat2	Bacteria	Methylomirabilota	Methylomirabilia	Rokubacteriales	CSP1-6	Unassign	Unassign	868	20315	4447924	71.24	5591	56.77	2.59	0
SGB1071	RS-B032_bin23.metabat2	Bacteria	Actinobacteriota	Thermoleophilia	Solirubrobacterales	1970-09-01	VAYN01	Unassign	202	86431	2772688	67.98	19077	88.28	9.05	77
SGB1072	RS-B032_bin231.metabat2	Bacteria	Desulfobacterota_B	Binatia	JACPRU01	JACPRU01	JACPRU01	Unassign	675	30579	3609427	67.53	5972	76.79	5.03	0
SGB1073	RS-B032_bin233.metabat2	Bacteria	Acidobacteriota	Mor1	Gp22-AA2	Gp22-AA2	Unassign	Unassign	335	49284	2648068	67.79	9787	54.89	0.94	0
SGB1074	RS-B032_bin237.metabat2	Bacteria	Proteobacteria	Gammaproteobacteria	Burkholderiales	Usitatibacteraceae	Usitatibacter	Unassign	443	28162	2770936	66.1	7217	53.45	1.72	0
SGB1075	RS-B032_bin240.metabat2	Bacteria	Acidobacteriota	Thermoanaerobaculia	UBA5066	Gp7-AA6	Unassign	Unassign	440	14696	1843977	69.44	4222	60.2	0.34	0
SGB1076	RS-B032_bin244.metabat2	Bacteria	Acidobacteriota	Acidobacteriae	Acidoferrales	UBA7541	Acidoferrum	Unassign	385	32084	2578654	57.66	7436	54.36	2.08	0
SGB1077	RS-B032_bin246.metabat2	Bacteria	Proteobacteria	Gammaproteobacteria	Steroidobacterales	Steroidobacteraceae	CAILZL01	Unassign	295	40331	3137342	57.6	13249	80.17	0	0
SGB1078	RS-B032_bin253.metabat2	Bacteria	Patescibacteria	Saccharimonadia	Saccharimonadales	UBA4665	Unassign	Unassign	5	484439	1212177	47.5	358684	64.96	0.85	0
SGB1079	RS-B032_bin259.metabat2	Bacteria	Proteobacteria	Gammaproteobacteria	Steroidobacterales	Steroidobacteraceae	13-2-20CM-66-19	Unassign	311	247481	8062787	61.08	58628	86.63	9.75	10
SGB1080	RS-B032_bin26.metabat2	Bacteria	Acidobacteriota	Acidobacteriae	Acidoferrales	UBA7541	Acidoferrum	Unassign	163	137688	4284668	61.87	40791	87.97	4.7	0
SGB1081	RS-B032_bin261.metabat2	Bacteria	Proteobacteria	Alphaproteobacteria	Rhizobiales	Xanthobacteraceae	Unassign	Unassign	629	44364	3869765	60.7	6845	57.69	4.54	3
SGB1082	RS-B032_bin32.metabat2	Bacteria	Cyanobacteria	Vampirovibrionia	Vampirovibrionales	Vampirovibrionaceae	Unassign	Unassign	287	42976	2745134	44.98	11343	73.93	0.85	0
SGB1083	RS-B032_bin33.metabat2	Bacteria	Proteobacteria	Gammaproteobacteria	Burkholderiales	Burkholderiaceae	Ralstonia	Unassign	433	71148	5202148	64.21	17350	69.83	1.72	7
SGB1084	RS-B032_bin44.metabat2	Bacteria	Bacteroidota	Bacteroidia	Flavobacteriales	Weeksellaceae	Chryseobacterium	Unassign	196	86628	3790886	37.56	28252	97.3	0	5
SGB1085	RS-B032_bin5.metabat2	Bacteria	Actinobacteriota	Actinomycetia	Mycobacteriales	Unassign	Unassign	Unassign	433	46207	3368833	73.75	10077	71.69	9.61	58
SGB1086	RS-B032_bin50.metabat2	Bacteria	Proteobacteria	Gammaproteobacteria	Burkholderiales	Burkholderiaceae	CAIMXF01	Unassign	562	34064	4673578	70.17	11076	66.09	3.26	0
SGB1087	RS-B032_bin53.metabat2	Bacteria	Proteobacteria	Gammaproteobacteria	Burkholderiales	Burkholderiaceae	Mitsuaria	Unassign	340	125608	5241929	69.24	22111	74.64	3.45	3
SGB1088	RS-B032_bin6.metabat2	Bacteria	Acidobacteriota	Blastocatellia	Pyrinomonadales	Pyrinomonadaceae	PSRF01	Unassign	633	44772	4459981	57.4	8105	71.56	4.33	22
SGB1089	RS-B032_bin64.metabat2	Bacteria	Bacteroidota	Bacteroidia	Chitinophagales	Chitinophagaceae	Chitinophaga	Unassign	121	259485	7751674	45.59	111332	99.75	0.66	9
SGB1090	RS-B032_bin76.metabat2	Bacteria	Proteobacteria	Alphaproteobacteria	Micropepsales	Micropepsaceae	Rhizomicrobium	Unassign	416	30340	2840419	59.89	8474	72.93	7.53	0
SGB1091	RS-B032_bin81.metabat2	Bacteria	Proteobacteria	Alphaproteobacteria	UBA9219	UBA9219	Unassign	Unassign	199	31882	1330901	57	7602	67.14	1.32	0
SGB1092	RS-B032_bin83.metabat2	Bacteria	Actinobacteriota	Thermoleophilia	Solirubrobacterales	Solirubrobacteraceae	Palsa-744	Unassign	276	47835	2949516	66.58	14514	82.99	2.59	1
SGB1093	RS-B032_bin89.metabat2	Bacteria	Acidobacteriota	Vicinamibacteria	Vicinamibacterales	UBA2999	2-02-FULL-65-29	Unassign	634	53775	5734636	63.62	11787	76.52	1.72	0
SGB1094	RS-B032_bin93.metabat2	Bacteria	Proteobacteria	Alphaproteobacteria	ATCC43930	Stellaceae	AP-15	Unassign	383	44100	3724762	67.16	13663	81.82	5.43	1
SGB1095	RS-B032_bin99.metabat2	Bacteria	Planctomycetota	Phycisphaerae	UBA1845	UTPLA1	JACRIM01	Unassign	52	496130	5017556	58.54	222095	98.23	1.7	0
SGB1096	RS-B032_bins148.concoct	Bacteria	Proteobacteria	Alphaproteobacteria	Sphingomonadales	Sphingomonadaceae	Sphingobium	Sphingobium yanoikuyae	664	40869	2264341	64.86	3425	53.52	4.42	0
SGB1097	RS-B032_bins169.concoct	Bacteria	Proteobacteria	Alphaproteobacteria	Micropepsales	Micropepsaceae	Rhizomicrobium	Unassign	212	110333	5138289	65.3	38067	95.29	9.61	2
SGB1098	RS-B032R_bin13.metabat2	Bacteria	Nitrospirota	Nitrospiria	Nitrospirales	Nitrospiraceae	Palsa-1315	Unassign	415	30648	2855512	54.85	7854	91.84	3.03	0
SGB1099	RS-B032R_bin2.metabat2	Bacteria	Actinobacteriota	Thermoleophilia	Solirubrobacterales	1970-09-01	VAYN01	Unassign	290	41832	2654783	68.3	11387	83.43	2.16	0
SGB1100	RS-B032R_bin20.metabat2	Bacteria	Proteobacteria	Alphaproteobacteria	Rhizobiales	Xanthobacteraceae	Pseudolabrys	Unassign	888	36435	5104019	58.3	6269	53.79	3.45	0
SGB1101	RS-B032R_bin34.metabat2	Bacteria	Bacteroidota	Bacteroidia	Flavobacteriales	Weeksellaceae	Chryseobacterium	Chryseobacterium sp002434285	460	31457	3217709	37.31	8095	88.86	0	1
SGB1102	RS-B032R_bin35.metabat2	Bacteria	Proteobacteria	Gammaproteobacteria	Steroidobacterales	Steroidobacteraceae	FEN-1191	Unassign	30	318126	3429557	64.25	172849	97.3	0	8
SGB1103	RS-B032R_bins18.concoct	Bacteria	Proteobacteria	Gammaproteobacteria	Steroidobacterales	Steroidobacteraceae	CAILZL01	Unassign	59	345041	4902605	60	141850	97.37	3.58	3
SGB1104	RS-B032R_bins8.concoct	Bacteria	Acidobacteriota	Blastocatellia	Pyrinomonadales	Pyrinomonadaceae	PSRF01	Unassign	1175	12460	4068584	55.92	3503	58.45	0.85	0
SGB1105	RS-B033_bin12.metabat2	Bacteria	Proteobacteria	Alphaproteobacteria	Micropepsales	Micropepsaceae	Rhizomicrobium	Unassign	357	24310	1772249	59.39	5408	64.02	1.88	0
SGB1106	RS-B033_bin3.metabat2	Bacteria	Proteobacteria	Alphaproteobacteria	Sphingomonadales	Sphingomonadaceae	Sphingobium	Unassign	210	83814	2705373	60.73	20397	85.03	2.35	6
SGB1107	RS-B033_bin4.metabat2	Bacteria	Verrucomicrobiota	Verrucomicrobiae	Chthoniobacterales	UBA10450	AV40	Unassign	300	13826	1358013	55.36	4767	67.45	1.15	0
SGB1108	RS-B033_bins39.concoct	Bacteria	Proteobacteria	Gammaproteobacteria	Burkholderiales	Burkholderiaceae	Pelomonas	Unassign	607	34182	4731887	68.72	9441	79.57	3.21	0
SGB1109	RS-B034.bins038.maxbin	Bacteria	Proteobacteria	Gammaproteobacteria	Pseudomonadales	Moraxellaceae	Acinetobacter	Unassign	433	79258	2144541	40.36	5687	54.83	3.84	3
SGB1110	RS-B034_bin1.metabat2	Bacteria	Actinobacteriota	Thermoleophilia	Solirubrobacterales	Solirubrobacteraceae	Palsa-744	Unassign	260	63986	2353134	68.27	11229	82.42	1.85	1
SGB1111	RS-B034_bin18.metabat2	Bacteria	Proteobacteria	Alphaproteobacteria	Rhizobiales	Xanthobacteraceae	BOG-931	Unassign	629	24192	4013727	65.78	7500	56.03	3.45	3
SGB1112	RS-B034_bin35.metabat2	Bacteria	Proteobacteria	Gammaproteobacteria	Steroidobacterales	Steroidobacteraceae	13-2-20CM-66-19	Unassign	210	178755	6097325	63.22	48251	96.34	8.25	5
SGB1113	RS-B034_bin36.metabat2	Bacteria	Actinobacteriota	Actinomycetia	Mycobacteriales	Mycobacteriaceae	Mycobacterium	Unassign	1079	35259	6828490	64.96	7454	77.74	6.65	13
SGB1114	RS-B034_bin37.metabat2	Bacteria	Acidobacteriota	Acidobacteriae	Acidobacteriales	SbA1	KAN-5	Unassign	284	112915	5915634	52.48	28924	95.06	1.28	1
SGB1115	RS-B034_bin9.metabat2	Bacteria	Proteobacteria	Alphaproteobacteria	Rhizobiales	Hyphomicrobiaceae	Hyphomicrobium	Unassign	502	15585	2222245	59.79	4530	61.05	4.52	0
SGB1116	RS-B034_bins4.concoct	Bacteria	Actinobacteriota	Thermoleophilia	Solirubrobacterales	Solirubrobacteraceae	Palsa-465	Unassign	255	57298	2364849	68.11	11296	78.73	1.28	1
SGB1117	RS-B034_bins49.concoct	Bacteria	Acidobacteriota	Vicinamibacteria	Vicinamibacterales	UBA2999	Unassign	Unassign	668	13005	2457403	65.21	3844	50.34	1.72	0
SGB1118	RS-B034_bins5.concoct	Bacteria	Actinobacteriota	Acidimicrobiia	IMCC26256	PALSA-610	Unassign	Unassign	784	15397	2816267	65.83	3630	52.11	3.42	0
SGB1119	RS-B034_bins54.concoct	Bacteria	Proteobacteria	Gammaproteobacteria	Burkholderiales	Burkholderiaceae	Mitsuaria	Unassign	377	100823	5782761	70.22	21605	92.29	4.95	2
SGB1120	RS-B035.bins001.maxbin	Bacteria	Proteobacteria	Gammaproteobacteria	Pseudomonadales	Moraxellaceae	Acinetobacter	Acinetobacter johnsonii	213	104880	3624582	41.73	33714	99.09	1.59	10
SGB1121	RS-B035.bins020.maxbin	Bacteria	Proteobacteria	Gammaproteobacteria	Enterobacterales	Enterobacteriaceae	Kosakonia	Kosakonia sp002886105	381	141982	4422386	55.16	23553	85.25	3.63	13
SGB1122	RS-B035_bin1.metabat2	Bacteria	Proteobacteria	Alphaproteobacteria	Sphingomonadales	Sphingomonadaceae	Novosphingobium	Unassign	255	15714	1215370	67.16	5003	53.07	1.15	0
SGB1123	RS-B035_bin16.metabat2	Bacteria	Bacteroidota	Bacteroidia	Flavobacteriales	Weeksellaceae	Chryseobacterium	Chryseobacterium sp002434285	158	195934	3960533	36.96	37634	98.63	0.12	5
SGB1124	RS-B035_bin21.metabat2	Bacteria	Proteobacteria	Gammaproteobacteria	Enterobacterales	Enterobacteriaceae	Pantoea	Unassign	519	47117	3404188	54.1	7634	50.5	0	20
SGB1125	RS-B035_bin23.metabat2	Bacteria	Proteobacteria	Alphaproteobacteria	Rhizobiales	Xanthobacteraceae	BOG-931	Unassign	252	139596	3578235	63.37	30148	74.95	7.76	1
SGB1126	RS-B035_bin27.metabat2	Bacteria	Bacteroidota	Bacteroidia	Cytophagales	Spirosomaceae	Siphonobacter	Unassign	679	48923	5219448	54.87	9397	91.58	1.1	1
SGB1127	RS-B035_bin28.metabat2	Bacteria	Bacteroidota	Bacteroidia	Flavobacteriales	Weeksellaceae	Chryseobacterium	Unassign	246	111254	4781188	33.88	30837	95.67	0.12	5
SGB1128	RS-B035_bin3.metabat2	Bacteria	Actinobacteriota	Actinomycetia	Actinomycetales	Microbacteriaceae	Microbacterium	Unassign	219	66654	3183327	69.46	21179	95.01	1.26	14
SGB1129	RS-B035_bin30.metabat2	Bacteria	Proteobacteria	Alphaproteobacteria	Unassign	Unassign	Unassign	Unassign	317	24736	1776403	65.96	6137	72.6	1.32	0
SGB1130	RS-B035_bin31.metabat2	Bacteria	Proteobacteria	Gammaproteobacteria	Burkholderiales	Burkholderiaceae	Herbaspirillum	Herbaspirillum huttiense	703	32419	3892487	63.22	6350	71.57	0.58	0
SGB1131	RS-B035_bin33.metabat2	Bacteria	Proteobacteria	Gammaproteobacteria	DSM-16500	DSM-16500	Unassign	Unassign	73	92055	1573196	39.96	29614	95.93	0.19	8
SGB1132	RS-B035_bins18.concoct	Bacteria	Proteobacteria	Gammaproteobacteria	Steroidobacterales	Steroidobacteraceae	CAILZL01	Unassign	478	14659	1610337	56.18	3347	58.34	0.54	0
SGB1133	RS-B035_bins5.concoct	Bacteria	Proteobacteria	Alphaproteobacteria	Sphingomonadales	Sphingomonadaceae	Novosphingobium	Unassign	172	134702	5082791	64.16	46695	97.09	2.05	4
SGB1134	RS-B036_bin14.metabat2	Bacteria	Actinobacteriota	Thermoleophilia	Solirubrobacterales	1970-09-01	VAYN01	Unassign	363	28387	2493085	69.45	8032	86.03	4.02	0
SGB1135	RS-B036_bin23.metabat2	Bacteria	Proteobacteria	Alphaproteobacteria	Sphingomonadales	Sphingomonadaceae	Novosphingobium	Unassign	27	424865	3604605	66.13	208453	99.25	1.28	2
SGB1136	RS-B036_bin3.metabat2	Bacteria	Acidobacteriota	Blastocatellia	Pyrinomonadales	Pyrinomonadaceae	PSRF01	Unassign	413	86688	6979149	54.17	24424	93.77	4.27	118
SGB1137	RS-B036_bin9.metabat2	Bacteria	Actinobacteriota	Acidimicrobiia	Acidimicrobiales	AC-14	Unassign	Unassign	542	26558	2412511	70.92	4479	50.73	0.09	0
SGB1138	RS-B037.bins003.maxbin	Bacteria	Proteobacteria	Alphaproteobacteria	Caulobacterales	TH1-2	Terricaulis	Unassign	123	194451	3389867	65.66	52172	96.92	4.42	4
SGB1139	RS-B037.bins006.maxbin	Bacteria	Proteobacteria	Alphaproteobacteria	Sphingomonadales	Sphingomonadaceae	Allosphingosinicella	Unassign	318	44954	1351224	64.17	4308	50.94	3.06	0
SGB1140	RS-B037.bins008.maxbin	Bacteria	Proteobacteria	Alphaproteobacteria	Unassign	Unassign	Unassign	Unassign	456	30150	1714474	64.37	3919	55.46	4.99	0
SGB1141	RS-B037.bins047.maxbin	Bacteria	Proteobacteria	Gammaproteobacteria	Pseudomonadales	Moraxellaceae	Acinetobacter	Acinetobacter johnsonii	434	43630	1732866	43.06	4222	52.61	2.84	0
SGB1142	RS-B037_bin1.metabat2	Bacteria	Proteobacteria	Alphaproteobacteria	Sphingomonadales	Sphingomonadaceae	Novosphingobium	Unassign	120	100681	3050809	67.25	48897	96.39	3.1	9
SGB1143	RS-B037_bin31.metabat2	Bacteria	Proteobacteria	Alphaproteobacteria	Rhizobiales	Rhizobiaceae	Rhizobium_A	Rhizobium_A rhizoryzae	67	470569	5003419	58.15	131968	98.05	0.39	33
SGB1144	RS-B037_bin40.metabat2	Bacteria	Actinobacteriota	Actinomycetia	Mycobacteriales	Mycobacteriaceae	Mycobacterium	Unassign	230	249853	5872804	67.23	41114	98.36	0.63	61
SGB1145	RS-B037_bin43.metabat2	Bacteria	Proteobacteria	Gammaproteobacteria	Steroidobacterales	Steroidobacteraceae	CAILZL01	Unassign	219	145459	4877812	56.74	36935	96.74	3.89	6
SGB1146	RS-B037_bin58.metabat2	Bacteria	Proteobacteria	Alphaproteobacteria	Unassign	Unassign	Unassign	Unassign	107	199657	3475599	63.5	63995	98.8	1.23	2
SGB1147	RS-B037_bin60.metabat2	Bacteria	Bacteroidota	Bacteroidia	Cytophagales	Spirosomaceae	Dyadobacter	Unassign	534	142454	6392203	43.25	17425	95.48	1.19	6
SGB1148	RS-B037_bin62.metabat2	Bacteria	Actinobacteriota	Actinomycetia	Mycobacteriales	Frankiaceae	Frankia	Unassign	794	62851	6721000	70.37	10956	88.73	2.07	12
SGB1149	RS-B037_bin8.metabat2	Bacteria	Proteobacteria	Alphaproteobacteria	Unassign	Unassign	Unassign	Unassign	248	96940	4143623	64.26	26802	95.43	4.62	11
SGB1150	RS-B037_bins28.concoct	Bacteria	Acidobacteriota	Vicinamibacteria	Vicinamibacterales	UBA2999	VFZH01	Unassign	343	57862	3602298	65.71	13699	87.13	4.7	0
SGB1151	RS-B037_bins57.concoct	Bacteria	Actinobacteriota	Acidimicrobiia	UBA5794	ZC4RG35	Unassign	Unassign	517	9881	1709533	65.29	3339	61.65	4.03	0
SGB1152	RS-B037_bins58.concoct	Bacteria	Bacteroidota	Bacteroidia	Flavobacteriales	Weeksellaceae	Empedobacter	Empedobacter brevis	484	12553	1678975	33.32	3519	65.85	2.15	0
SGB1153	RS-B038_bin1.metabat2	Bacteria	Proteobacteria	Gammaproteobacteria	Pseudomonadales	M0112	Unassign	Unassign	640	58434	6145125	56.36	12487	93.39	3.83	24
SGB1154	RS-B038_bin13.metabat2	Bacteria	Bacteroidota	Bacteroidia	Chitinophagales	Chitinophagaceae	Unassign	Unassign	681	31401	3443740	39.18	5453	63.25	1.24	0
SGB1155	RS-B038_bin15.metabat2	Bacteria	Proteobacteria	Gammaproteobacteria	Pseudomonadales	Pseudomonadaceae	Pseudomonas_E	Unassign	723	40234	4138949	62.62	6520	73.45	1.72	7
SGB1156	RS-B038_bin17.metabat2	Bacteria	Actinobacteriota	Actinomycetia	Actinomycetales	Microbacteriaceae	Microbacterium	Microbacterium hydrothermale	491	15427	1984563	70.32	3963	50.58	0.06	0
SGB1157	RS-B038_bin23.metabat2	Bacteria	Proteobacteria	Gammaproteobacteria	Pseudomonadales	Pseudomonadaceae	Pseudomonas_E	Pseudomonas_E sediminis	104	279503	5162327	62.27	75801	98.38	0.72	19
SGB1158	RS-B038_bin26.metabat2	Bacteria	Proteobacteria	Alphaproteobacteria	Rhizobiales	Aestuariivirgaceae	Aestuariivirga	Unassign	605	20238	2684010	60.73	4436	51.76	3.01	0
SGB1159	RS-B038_bin27.metabat2	Bacteria	Proteobacteria	Gammaproteobacteria	Steroidobacterales	Steroidobacteraceae	CAILZL01	Unassign	550	14909	2406408	56.4	4446	53.42	1.49	0
SGB1160	RS-B038_bins0.concoct	Bacteria	Myxococcota	Polyangia	Polyangiales	JAFGIB01	Unassign	Unassign	1122	52670	9020050	65.26	9351	75.54	4.03	4
SGB1161	RS-B038_bins16.concoct	Bacteria	Acidobacteriota	Thermoanaerobaculia	UBA5704	UBA5704	Unassign	Unassign	1107	12457	3661735	67.4	3314	52.85	3.42	0
SGB1162	RS-B038_bins22.concoct	Bacteria	Nitrospirota	Nitrospiria	Nitrospirales	Nitrospiraceae	Nitrospira_F	Unassign	479	12335	1550421	56.3	3226	57.5	2.72	0
SGB1163	RS-B038_bins28.concoct	Bacteria	Planctomycetota	Planctomycetia	Pirellulales	Lacipirellulaceae	JABDGM01	Unassign	855	56945	5840611	60.11	8426	73.1	0	0
SGB1164	RS-B038_bins50.concoct	Bacteria	Proteobacteria	Alphaproteobacteria	Caulobacterales	TH1-2	Terricaulis	Unassign	297	47688	2801779	63.05	12079	87.19	1.35	0
SGB1165	RS-B039_bin10.metabat2	Bacteria	Actinobacteriota	Thermoleophilia	Solirubrobacterales	1970-09-01	Unassign	Unassign	306	27654	1960556	68.36	7621	80.18	0.86	0
SGB1166	RS-B040_bin7.metabat2	Bacteria	Proteobacteria	Alphaproteobacteria	Rhizobiales	Hyphomicrobiaceae	Hyphomicrobium_A	Unassign	441	13862	1893318	64.02	4485	51.3	1.9	1
SGB1167	RS-B041_bin29.metabat2	Bacteria	Actinobacteriota	Actinomycetia	Mycobacteriales	Mycobacteriaceae	Mycobacterium	Unassign	758	37983	4995223	64.88	7929	78.86	2.05	55
SGB1168	RS-B041_bin52.metabat2	Bacteria	Proteobacteria	Gammaproteobacteria	Xanthomonadales	Xanthomonadaceae	Stenotrophomonas	Stenotrophomonas acidaminiphila_A	78	206095	3427985	70.02	74328	81.38	0	1
SGB1169	RS-B041_bin9.metabat2	Bacteria	Proteobacteria	Gammaproteobacteria	Steroidobacterales	Steroidobacteraceae	13-2-20CM-66-19	Unassign	590	57575	4059312	61.74	8240	81.01	1.73	1
SGB1170	RS-B041_bins55.concoct	Bacteria	Proteobacteria	Alphaproteobacteria	Rhizobiales	Beijerinckiaceae	Roseiarcus	Unassign	568	12171	2000401	65.19	3528	53.9	2.51	0
SGB1171	RS-B043.bins032.maxbin	Bacteria	Proteobacteria	Alphaproteobacteria	Rhizobiales	Hyphomicrobiaceae	Hyphomicrobium	Unassign	386	20982	1847238	60.56	5467	58.89	3.32	1
SGB1172	RS-B043_bin14.metabat2	Bacteria	Proteobacteria	Alphaproteobacteria	Caulobacterales	Caulobacteraceae	Brevundimonas	Brevundimonas diminuta_A	418	29100	2388761	67.38	6344	76.18	1.72	0
SGB1173	RS-B043_bin22.metabat2	Bacteria	Proteobacteria	Gammaproteobacteria	Steroidobacterales	Steroidobacteraceae	FEN-1191	Unassign	477	33136	3081616	66.74	7632	79.3	5.58	0
SGB1174	RS-B043_bin26.metabat2	Bacteria	Proteobacteria	Alphaproteobacteria	Sphingomonadales	Sphingomonadaceae	Novosphingobium	Unassign	131	225638	4036786	62.6	48743	97.15	1.54	11
SGB1175	RS-B043_bin30.metabat2	Bacteria	Proteobacteria	Alphaproteobacteria	Rhizobiales	Beijerinckiaceae	Bosea	Unassign	467	122854	5781049	66.1	18206	89.62	3.97	0
SGB1176	RS-B043_bin51.metabat2	Bacteria	Proteobacteria	Alphaproteobacteria	Sphingomonadales	Sphingomonadaceae	Sphingopyxis	Sphingopyxis terrae	407	58233	2090376	65.33	5433	63.79	0	0
SGB1177	RS-B043_bin57.metabat2	Bacteria	Patescibacteria	Saccharimonadia	Saccharimonadales	UBA1547	UBA6175	Unassign	33	188116	845835	46.66	29386	70.69	0	0
SGB1178	RS-B043_bin64.metabat2	Bacteria	Proteobacteria	Gammaproteobacteria	Pseudomonadales	Moraxellaceae	Acinetobacter	Acinetobacter junii	143	97049	2973918	38.6	29640	77.93	1.72	7
SGB1179	RS-B043_bin69.metabat2	Bacteria	Actinobacteriota	Actinomycetia	Mycobacteriales	Jatrophihabitantaceae	MT45	Unassign	111	170068	2940378	65.13	40133	94.77	1.4	13
SGB1180	RS-B043_bin71.metabat2	Bacteria	Acidobacteriota	Acidobacteriae	Acidoferrales	UBA7541	Acidoferrum	Unassign	512	63766	3170297	59.2	6694	60.5	0.85	0
SGB1181	RS-B043_bins40.concoct	Bacteria	Actinobacteriota	Thermoleophilia	Miltoncostaeales	Unassign	Unassign	Unassign	228	27315	1784880	73.58	8769	55.79	0	0
SGB1182	RS-B044_bin19.metabat2	Bacteria	Actinobacteriota	Actinomycetia	Propionibacteriales	Nocardioidaceae	Nocardioides	Unassign	701	26554	4133878	70.62	6991	63.28	1.72	0
SGB1183	RS-B044_bin27.metabat2	Bacteria	Actinobacteriota	Thermoleophilia	Solirubrobacterales	1970-09-01	Unassign	Unassign	284	39027	2061386	68.44	8506	85.6	3.02	0
SGB1184	RS-B044_bin29.metabat2	Bacteria	Proteobacteria	Gammaproteobacteria	Burkholderiales	Burkholderiaceae	ALPHA2B	Unassign	801	23134	3840769	69.05	5061	71.02	5.4	0
SGB1185	RS-B044_bin47.metabat2	Bacteria	Proteobacteria	Alphaproteobacteria	Rhizobiales	Xanthobacteraceae	VAZQ01	Unassign	437	24629	2295971	62.12	5819	63.11	1.26	0
SGB1186	RS-B044_bin7.metabat2	Bacteria	Verrucomicrobiota	Verrucomicrobiae	Chthoniobacterales	UBA10450	AV40	Unassign	358	16920	1664350	55.8	4932	57.3	4.03	0
SGB1187	RS-B045_bin11.metabat2	Bacteria	Proteobacteria	Gammaproteobacteria	Pseudomonadales	Pseudomonadaceae	Pseudomonas_E	Pseudomonas_E sp002113375	515	32518	3360325	60.23	7564	50.88	3.51	0
SGB1188	RS-B045_bin21.metabat2	Bacteria	Actinobacteriota	Thermoleophilia	Solirubrobacterales	1970-09-01	Unassign	Unassign	344	18012	1577314	69.07	4793	67.79	3.74	0
SGB1189	RS-B045_bins12.concoct	Bacteria	Proteobacteria	Alphaproteobacteria	Rhizobiales	Xanthobacteraceae	Bradyrhizobium	Unassign	416	129026	7477139	64.86	26894	72.27	0	1
SGB1190	RS-B045_bins48.concoct	Bacteria	Proteobacteria	Gammaproteobacteria	Burkholderiales	Methylophilaceae	Methylophilus	Unassign	424	16195	1771620	50.88	4375	68.89	1.92	0
SGB1191	RS-B046.bins045.maxbin	Bacteria	Bacteroidota	Bacteroidia	Flavobacteriales	Weeksellaceae	Epilithonimonas	Unassign	242	71962	3111937	34.31	18880	92.49	0.61	5
SGB1192	RS-B046.bins055.maxbin	Bacteria	Proteobacteria	Gammaproteobacteria	Enterobacterales	Enterobacteriaceae	Citrobacter	Citrobacter portucalensis	752	75714	3975926	52.08	6561	50.66	1.72	0
SGB1193	RS-B046_bin20.metabat2	Bacteria	Proteobacteria	Alphaproteobacteria	Caulobacterales	Caulobacteraceae	Phenylobacterium	Unassign	501	23527	2341019	68.79	4717	56.05	1.92	0
SGB1194	RS-B046_bin21.metabat2	Bacteria	Proteobacteria	Alphaproteobacteria	Sphingomonadales	Sphingomonadaceae	Sphingopyxis	Unassign	533	12555	2167261	66.98	4116	53.45	1.72	0
SGB1195	RS-B046_bin31.metabat2	Bacteria	Proteobacteria	Gammaproteobacteria	Burkholderiales	Burkholderiaceae	Limnobacter	Unassign	77	164665	2738590	50.87	55324	96.01	0.85	4
SGB1196	RS-B046_bin33.metabat2	Bacteria	Proteobacteria	Alphaproteobacteria	Sphingomonadales	Sphingomonadaceae	Sphingomonas_H	Unassign	293	21892	1526710	67.42	5676	50	0	0
SGB1197	RS-B046_bin37.metabat2	Bacteria	Proteobacteria	Gammaproteobacteria	Burkholderiales	Burkholderiaceae	Polaromonas	Unassign	407	88258	4279068	64.8	14339	93.07	2.18	3
SGB1198	RS-B046_bin47.metabat2	Bacteria	Proteobacteria	Gammaproteobacteria	Burkholderiales	Burkholderiaceae	Acidovorax	Unassign	553	75032	4972656	68.45	11772	86.62	6.4	1
SGB1199	RS-B046_bin49.metabat2	Bacteria	Proteobacteria	Gammaproteobacteria	Legionellales	Legionellaceae	Legionella	Legionella steelei	63	286208	3814917	38.67	95147	98.8	0.38	6
SGB1200	RS-B046_bin58.metabat2	Bacteria	Proteobacteria	Gammaproteobacteria	Xanthomonadales	Xanthomonadaceae	Lysobacter	Unassign	623	94057	5463706	69.63	11340	58.97	0.86	176
SGB1201	RS-B046_bins36.concoct	Bacteria	Bacteroidota	Bacteroidia	Chitinophagales	Chitinophagaceae	Agriterribacter	Unassign	904	13778	2886355	44.31	3185	56.03	0.51	0
SGB1202	RS-B046_bins65.concoct	Bacteria	Proteobacteria	Gammaproteobacteria	Burkholderiales	Burkholderiaceae	PBB1	Unassign	485	23184	3208192	68.56	7402	77.27	0.75	1
SGB1203	RS-B047_bin10.metabat2	Bacteria	Proteobacteria	Gammaproteobacteria	Pseudomonadales	Moraxellaceae	Acinetobacter	Unassign	212	147463	4125637	38.5	30503	98.81	1.14	12
SGB1204	RS-B047_bin11.metabat2	Bacteria	Proteobacteria	Alphaproteobacteria	Rhizobiales	Rhizobiaceae	Rhizobium	Unassign	264	178285	7002943	59.83	41710	96.82	1.98	3
SGB1205	RS-B047_bin18.metabat2	Bacteria	Proteobacteria	Gammaproteobacteria	Burkholderiales	Burkholderiaceae	Pseudoduganella	Unassign	206	113078	3418334	64.86	22764	77.96	1.45	1
SGB1206	RS-B047_bin20.metabat2	Bacteria	Proteobacteria	Gammaproteobacteria	Enterobacterales	Enterobacteriaceae	Pantoea	Pantoea endophytica	85	370506	4804247	55.1	79840	89.45	6.1	31
SGB1207	RS-B047_bin3.metabat2	Bacteria	Bacteroidota	Bacteroidia	Sphingobacteriales	Sphingobacteriaceae	Mucilaginibacter	Unassign	747	36622	4669708	43.21	7097	61.21	0	0
SGB1208	RS-B047_bin4.metabat2	Bacteria	Actinobacteriota	Actinomycetia	Actinomycetales	Microbacteriaceae	Pseudolysinimonas	Unassign	485	24147	2387770	70.28	5134	72.54	7.85	0
SGB1209	RS-B047_bin9.metabat2	Bacteria	Proteobacteria	Gammaproteobacteria	Xanthomonadales	Rhodanobacteraceae	Dyella_B	Unassign	114	287888	4730497	64.39	63845	96.33	2.43	12
SGB1210	RS-B047_bins15.concoct	Bacteria	Bacteroidota	Bacteroidia	Flavobacteriales	Weeksellaceae	Chryseobacterium	Unassign	141	148972	5296777	35.46	57500	99.46	2.68	2
SGB1211	RS-B047_bins43.concoct	Bacteria	Proteobacteria	Alphaproteobacteria	Sphingomonadales	Sphingomonadaceae	Sphingomonas	Unassign	288	94345	4409224	64.63	21125	91.33	2.85	7
SGB1212	RS-B048.bins004.maxbin	Bacteria	Proteobacteria	Gammaproteobacteria	Enterobacterales	Enterobacteriaceae	Enterobacter	Enterobacter huaxiensis	881	38883	4286491	56.77	5792	76.87	7.69	0
SGB1213	RS-B048_bin1.metabat2	Bacteria	Actinobacteriota	Actinomycetia	Mycobacteriales	Mycobacteriaceae	Mycobacterium	Unassign	628	56430	5356017	65.72	11245	90.05	0.98	5
SGB1214	RS-B048_bin12.metabat2	Bacteria	Actinobacteriota	Actinomycetia	Mycobacteriales	Mycobacteriaceae	Mycobacterium	Unassign	537	59056	5196548	66.46	12646	94.11	1.58	35
SGB1215	RS-B048_bin20.metabat2	Bacteria	Proteobacteria	Alphaproteobacteria	Rhizobiales	Rhizobiaceae	Rhizobium	Unassign	142	248698	6159811	61.76	65579	98.39	2.56	63
SGB1216	RS-B048_bin23.metabat2	Bacteria	Proteobacteria	Alphaproteobacteria	Rhizobiales	Rhizobiaceae	Mesorhizobium	Unassign	692	19600	3316229	64.69	5141	59.48	0.86	0
SGB1217	RS-B049_bin14.metabat2	Bacteria	Nitrospirota	Nitrospiria	Nitrospirales	Nitrospiraceae	Palsa-1315	Unassign	331	39280	2565168	55.04	9515	89.08	1.36	5
SGB1218	RS-B049_bin24.metabat2	Bacteria	Firmicutes	Bacilli	Paenibacillales	Paenibacillaceae	Paenibacillus	Unassign	368	78809	4546356	45.45	18300	90.44	1.18	8
SGB1219	RS-B049_bin29.metabat2	Bacteria	Patescibacteria	Saccharimonadia	Saccharimonadales	EFPC-124	Unassign	Unassign	46	119023	1110918	45.97	42623	58.12	0.85	0
SGB1220	RS-B049_bins10.concoct	Bacteria	Proteobacteria	Alphaproteobacteria	Rhizobiales	Rhizobiaceae	Mesorhizobium	Unassign	111	245138	5106542	64.39	70578	95.71	1.04	2
SGB1221	RS-B049_bins16.concoct	Bacteria	Actinobacteriota	Actinomycetia	Streptosporangiales	Streptosporangiaceae	Sphaerisporangium	Unassign	461	67725	5886927	67.15	16612	91.27	0	139
SGB1222	RS-B049_bins23.concoct	Bacteria	Proteobacteria	Gammaproteobacteria	Burkholderiales	Methylophilaceae	Methylophilus	Unassign	26	402056	2771806	50.28	157923	99.15	0	0
SGB1223	RS-B049_bins5.concoct	Bacteria	Proteobacteria	Gammaproteobacteria	Steroidobacterales	Steroidobacteraceae	PALSA-1196	Unassign	547	41842	4543928	63.93	10263	81.65	4.55	2
SGB1224	RS-B049_bins64.concoct	Bacteria	Actinobacteriota	Thermoleophilia	Solirubrobacterales	1970-09-01	VAYN01	Unassign	490	12185	1681006	67.83	3565	51.75	1.25	0
SGB1225	RS-B049_bins65.concoct	Bacteria	Proteobacteria	Gammaproteobacteria	Enterobacterales	Enterobacteriaceae	Serratia	Serratia nevei	73	321265	5216401	59.69	115139	99.1	0.76	86
SGB1226	RS-B050_bin11.metabat2	Bacteria	Nitrospirota	Nitrospiria	Nitrospirales	Nitrospiraceae	Palsa-1315	Unassign	440	19972	1865547	54.63	4297	62.19	1.93	0
SGB1227	RS-B050_bin2.metabat2	Bacteria	Patescibacteria	Saccharimonadia	Saccharimonadales	UBA4665	Unassign	Unassign	84	37436	937010	51.56	14954	63.91	0	0
SGB1228	RS-B050_bin3.metabat2	Bacteria	Chloroflexota	Ktedonobacteria	Ktedonobacterales	Ktedonobacteraceae	Unassign	Unassign	154	179297	4574809	47.09	49530	98.68	3.08	30
SGB1229	RS-B050_bin4.metabat2	Bacteria	Proteobacteria	Gammaproteobacteria	Steroidobacterales	Steroidobacteraceae	CAILZL01	Unassign	453	28815	2466254	57.55	5992	79.97	1.82	0
SGB1230	RS-B050_bin9.metabat2	Bacteria	Proteobacteria	Alphaproteobacteria	Sphingomonadales	Sphingomonadaceae	Novosphingobium	Unassign	199	76472	2513306	63.83	18620	90.25	0.97	7
SGB1231	RS-B050_bins26.concoct	Bacteria	Proteobacteria	Alphaproteobacteria	Rhizobiales	Xanthobacteraceae	Bradyrhizobium	Unassign	793	80268	6423463	61.95	9854	55.17	0.86	0
SGB1232	RS-B051_bin23.metabat2	Bacteria	Proteobacteria	Alphaproteobacteria	Unassign	Unassign	Unassign	Unassign	172	73837	3063627	58.26	26082	98.02	0.87	3
SGB1233	RS-B051_bin6.metabat2	Bacteria	Patescibacteria	Saccharimonadia	Saccharimonadales	Unassign	Unassign	Unassign	109	40094	1181340	48.69	14021	56.68	1.38	0
SGB1234	RS-B051_bins37.concoct	Bacteria	Proteobacteria	Gammaproteobacteria	Pseudomonadales	Moraxellaceae	Acinetobacter	Acinetobacter idrijaensis	91	203050	3514531	42.78	60704	100	0.31	10
SGB1235	RS-B053.bins006.maxbin	Bacteria	Proteobacteria	Gammaproteobacteria	Burkholderiales	Burkholderiaceae	Paraburkholderia	Unassign	120	254911	3962651	62.08	90849	72.91	3.36	4
SGB1236	RS-B053.bins043.maxbin	Bacteria	Proteobacteria	Gammaproteobacteria	Burkholderiales	Burkholderiaceae	DSNY01	Unassign	436	60556	4750591	65.27	19707	73.9	9.05	4
SGB1237	RS-B053.bins052.maxbin	Bacteria	Proteobacteria	Gammaproteobacteria	Burkholderiales	Methylophilaceae	CAILHX01	Unassign	106	181742	1369551	51.62	28580	50.86	4.8	3
SGB1238	RS-B053_bin109.metabat2	Bacteria	Planctomycetota	Phycisphaerae	Tepidisphaerales	Tepidisphaeraceae	Unassign	Unassign	514	20015	2840921	57.39	6249	80.38	2.27	50
SGB1239	RS-B053_bin114.metabat2	Bacteria	Patescibacteria	Paceibacteria	UBA9983_A	UBA2100	UBA10103	Unassign	74	32901	752950	61.48	13204	70.24	2.43	0
SGB1240	RS-B053_bin115.metabat2	Bacteria	Proteobacteria	Alphaproteobacteria	Rhizobiales	Hyphomicrobiaceae	Hyphomicrobium	Unassign	400	13705	1856160	60.13	4862	63.04	0.75	0
SGB1241	RS-B053_bin117.metabat2	Bacteria	Proteobacteria	Gammaproteobacteria	Burkholderiales	Methylophilaceae	Novimethylophilus	Unassign	115	147870	3050472	55.91	43677	79.31	0.86	3
SGB1242	RS-B053_bin12.metabat2	Bacteria	Acidobacteriota	Acidobacteriae	Acidoferrales	UBA7541	Acidoferrum	Unassign	461	127368	6539909	58.87	28994	87.19	8.8	0
SGB1243	RS-B053_bin121.metabat2	Bacteria	Bdellovibrionota	Bdellovibrionia_A	UBA1018	UBA1018	Unassign	Unassign	435	33889	2821942	58.5	7880	54.31	4.31	0
SGB1244	RS-B053_bin124.metabat2	Bacteria	Proteobacteria	Gammaproteobacteria	Steroidobacterales	Steroidobacteraceae	CAILZL01	Unassign	371	20143	2028779	60.48	5809	58.62	1.72	0
SGB1245	RS-B053_bin130.metabat2	Bacteria	Proteobacteria	Gammaproteobacteria	Steroidobacterales	Steroidobacteraceae	CAILZL01	Unassign	247	68974	2864137	58.35	18145	58.62	0	0
SGB1246	RS-B053_bin138.metabat2	Bacteria	Actinobacteriota	Actinomycetia	Propionibacteriales	Nocardioidaceae	Nocardioides	Unassign	277	77505	3975010	73.35	21493	99.61	6.36	6
SGB1247	RS-B053_bin148.metabat2	Bacteria	Myxococcota	Polyangia	Palsa-1104_A	Fen-1088	Unassign	Unassign	1116	41027	6499351	70.12	6584	51.04	3.51	1
SGB1248	RS-B053_bin21.metabat2	Bacteria	Proteobacteria	Gammaproteobacteria	Steroidobacterales	Steroidobacteraceae	CAILZL01	Unassign	55	183147	2776182	58.79	86915	92.03	1.69	5
SGB1249	RS-B053_bin26.metabat2	Bacteria	Acidobacteriota	Vicinamibacteria	Vicinamibacterales	UBA2999	2-12-FULL-65-11	Unassign	434	57765	2669683	65.53	6897	74.51	6.89	0
SGB1250	RS-B053_bin29.metabat2	Bacteria	Acidobacteriota	Blastocatellia	Pyrinomonadales	Pyrinomonadaceae	PSRF01	Unassign	620	47097	5591992	51.06	10884	84.12	3.42	1
SGB1251	RS-B053_bin30.metabat2	Bacteria	Proteobacteria	Alphaproteobacteria	Rhizobiales	Hyphomicrobiaceae	Hyphomicrobium	Unassign	162	102994	2387355	62.66	24918	79.95	7.66	0
SGB1252	RS-B053_bin31.metabat2	Bacteria	Verrucomicrobiota	Verrucomicrobiae	Pedosphaerales	UBA11358	UBA11358	Unassign	239	95338	3599239	57.48	22662	88.71	5.13	1
SGB1253	RS-B053_bin46.metabat2	Bacteria	Verrucomicrobiota	Verrucomicrobiae	Pedosphaerales	UBA11358	UBA11358	Unassign	339	30349	2420942	57.99	8787	76.12	7.79	0
SGB1254	RS-B053_bin48.metabat2	Bacteria	Acidobacteriota	Acidobacteriae	Acidobacteriales	SbA1	Unassign	Unassign	527	44813	3499503	61.56	7789	77.4	5.56	1
SGB1255	RS-B053_bin49.metabat2	Bacteria	Omnitrophota	Koll11	UBA10015	GCA-002753745	JAGNTT01	Unassign	159	86772	2325436	45.89	21172	80.82	2.15	0
SGB1256	RS-B053_bin55.metabat2	Bacteria	Acidobacteriota	Blastocatellia	Pyrinomonadales	Pyrinomonadaceae	Unassign	Unassign	373	19007	1858904	54.66	5154	57.07	4.75	0
SGB1257	RS-B053_bin74.metabat2	Bacteria	Proteobacteria	Alphaproteobacteria	Rhizobiales	Rhizobiaceae	Rhizobium	Rhizobium sp009498525	251	221105	6150890	60.54	44631	73.28	0	2
SGB1258	RS-B053_bin78.metabat2	Bacteria	Verrucomicrobiota	Verrucomicrobiae	Chthoniobacterales	Unassign	Unassign	Unassign	143	117751	3395056	61.25	32029	95.79	4.09	0
SGB1259	RS-B053_bin83.metabat2	Bacteria	Proteobacteria	Gammaproteobacteria	Burkholderiales	Methylophilaceae	CABHOJ01	Unassign	151	52907	1900189	53.12	16113	83.24	0.74	0
SGB1260	RS-B053_bin85.metabat2	Bacteria	Proteobacteria	Gammaproteobacteria	Burkholderiales	Methylophilaceae	CAILHX01	Unassign	72	181742	2154354	53.14	63421	77.59	0	1
SGB1261	RS-B053_bin87.metabat2	Bacteria	Verrucomicrobiota	Verrucomicrobiae	Chthoniobacterales	Unassign	Unassign	Unassign	293	40077	1973851	57.06	8202	61.38	3.45	0
SGB1262	RS-B053_bin90.metabat2	Bacteria	Proteobacteria	Gammaproteobacteria	Steroidobacterales	Steroidobacteraceae	FEN-1191	Unassign	278	29164	1910404	64.24	8128	59.83	3.45	0
SGB1263	RS-B053_bins170.concoct	Bacteria	Nitrospirota	Nitrospiria	Nitrospirales	Nitrospiraceae	2-02-FULL-62-14	Unassign	188	37210	1491730	61.41	11565	60.53	0	7
SGB1264	RS-B053_bins21.concoct	Bacteria	Actinobacteriota	Actinomycetia	Streptosporangiales	Streptosporangiaceae	Trebonia	Unassign	1190	37030	7010175	67.95	7025	64.79	4.14	216
SGB1265	RS-B053_bins79.concoct	Bacteria	Acidobacteriota	Acidobacteriae	Acidobacteriales	SbA1	Unassign	Unassign	592	40768	2618285	62.06	4773	54.23	4.45	0
SGB1266	RS-B053_bins88.concoct	Bacteria	Omnitrophota	Koll11	UBA10015	GCA-002753745	JACQCF01	Unassign	489	9217	1478675	43.1	2957	54.26	3.77	0
SGB1267	RS-B055.bins002.maxbin	Bacteria	Proteobacteria	Gammaproteobacteria	Burkholderiales	Burkholderiaceae	Mitsuaria	Unassign	135	267253	6974696	69.11	99802	95.33	7.87	24
SGB1268	RS-B055.bins034.maxbin	Bacteria	Actinobacteriota	Actinomycetia	Actinomycetales	Microbacteriaceae	Leifsonia	Unassign	668	46385	3628981	71.13	6477	71.22	8.65	3
SGB1269	RS-B055.bins103.maxbin	Bacteria	Firmicutes	Bacilli	Lactobacillales	Enterococcaceae	Enterococcus_D	Enterococcus_D sp001297065	92	96088	2125560	42.16	36901	62.02	1.72	0
SGB1270	RS-B055_bin100.metabat2	Bacteria	Actinobacteriota	Thermoleophilia	Gaiellales	Unassign	Unassign	Unassign	595	24026	3120943	71.75	5821	76.49	1.47	0
SGB1271	RS-B055_bin103.metabat2	Bacteria	Actinobacteriota	Actinomycetia	Streptomycetales	Streptomycetaceae	Streptomyces	Unassign	1276	32320	7468816	71.07	6589	81.81	3.38	97
SGB1272	RS-B055_bin113.metabat2	Bacteria	Firmicutes	Bacilli	Paenibacillales	Paenibacillaceae	Paenibacillus	Unassign	363	53332	4977092	43.01	18647	62.93	1.72	2
SGB1273	RS-B055_bin116.metabat2	Bacteria	Bacteroidota	Bacteroidia	Chitinophagales	Chitinophagaceae	Puia	Unassign	449	62451	3885558	42.03	11299	87.76	1.35	0
SGB1274	RS-B055_bin14.metabat2	Bacteria	Bacteroidota	Bacteroidia	Flavobacteriales	Weeksellaceae	Chryseobacterium	Chryseobacterium sp002979455	641	37118	3937361	35.81	6785	70.77	0.86	1
SGB1275	RS-B055_bin36.metabat2	Bacteria	Actinobacteriota	Actinomycetia	Actinomycetales	Micrococcaceae	Arthrobacter_K	Unassign	575	20759	2743781	64.04	4935	50.86	1.72	0
SGB1276	RS-B055_bin43.metabat2	Bacteria	Proteobacteria	Gammaproteobacteria	Xanthomonadales	Rhodanobacteraceae	Dyella	Unassign	581	45274	4371793	67.11	8751	51.72	0	5
SGB1277	RS-B055_bin44.metabat2	Bacteria	Firmicutes_A	Clostridia	Lachnospirales	Lachnospiraceae	Anaerocolumna	Unassign	517	14101	2033588	34.01	3829	50.89	1.34	0
SGB1278	RS-B055_bin60.metabat2	Bacteria	Firmicutes	Bacilli	Paenibacillales	Paenibacillaceae	Paenibacillus	Unassign	238	99827	5998176	52.61	36887	92.42	1.62	0
SGB1279	RS-B055_bin72.metabat2	Bacteria	Bacteroidota	Bacteroidia	Sphingobacteriales	Sphingobacteriaceae	Pedobacter	Pedobacter sp900564155	438	97485	6252941	41.31	21113	93.6	2.63	0
SGB1280	RS-B055_bin73.metabat2	Bacteria	Proteobacteria	Gammaproteobacteria	Burkholderiales	Burkholderiaceae	Ralstonia	Unassign	59	569065	5120442	64.1	124809	98.4	2.68	8
SGB1281	RS-B055_bin94.metabat2	Bacteria	Firmicutes	Bacilli	Paenibacillales	Paenibacillaceae	Paenibacillus	Unassign	96	256552	5413281	45.32	108076	80.17	1.72	18
SGB1282	RS-B055_bins0.concoct	Bacteria	Bacteroidota	Bacteroidia	Flavobacteriales	Flavobacteriaceae	Flavobacterium	Unassign	488	74719	5034494	33.19	14605	83.65	3.62	2
SGB1283	RS-B055_bins109.concoct	Bacteria	Proteobacteria	Alphaproteobacteria	Rhizobiales	Rhizobiaceae	Agrobacterium	Unassign	797	24610	3349634	53.62	4570	75.05	3.52	0
SGB1284	RS-B055_bins11.concoct	Bacteria	Proteobacteria	Gammaproteobacteria	Burkholderiales	Burkholderiaceae	Achromobacter	Unassign	550	85917	5101836	66.78	11457	85.44	2.9	10
SGB1285	RS-B055_bins115.concoct	Bacteria	Proteobacteria	Alphaproteobacteria	Sphingomonadales	Sphingomonadaceae	Sphingobium	Unassign	325	118986	2963031	65.01	11830	76.83	1.76	10
SGB1286	RS-B055_bins127.concoct	Bacteria	Bacteroidota	Bacteroidia	Sphingobacteriales	Sphingobacteriaceae	Pedobacter	Unassign	116	331508	6243018	41.85	112618	99.52	2.39	2
SGB1287	RS-B055_bins128.concoct	Bacteria	Firmicutes	Bacilli	Paenibacillales	Paenibacillaceae	Paenibacillus	Unassign	936	109909	6624432	49.54	9363	84.8	3.89	0
SGB1288	RS-B055_bins15.concoct	Bacteria	Proteobacteria	Alphaproteobacteria	Sphingomonadales	Sphingomonadaceae	Sphingomonas	Sphingomonas kyeonggiensis	596	32142	4017937	67.28	8121	79.92	2.27	8
SGB1289	RS-B055_bins37.concoct	Bacteria	Bacteroidota	Bacteroidia	Sphingobacteriales	Sphingobacteriaceae	Sphingobacterium	Sphingobacterium siyangense	992	52231	4313000	40.4	4810	52.59	0	0
SGB1290	RS-B055_bins42.concoct	Bacteria	Bacteroidota	Bacteroidia	Flavobacteriales	Weeksellaceae	Chryseobacterium	Unassign	374	50340	4178602	33.9	14823	88.28	1.23	10
SGB1291	RS-B055_bins70.concoct	Bacteria	Firmicutes	Bacilli	Paenibacillales	Paenibacillaceae	Paenibacillus_A	Unassign	875	27207	4394819	39.29	5700	52.74	3.45	0
SGB1292	RS-B055_bins72.concoct	Bacteria	Proteobacteria	Alphaproteobacteria	Rhizobiales	Beijerinckiaceae	Bosea	Unassign	569	36055	3433310	66.49	6880	60.34	1.72	0
SGB1293	RS-B056_bin25.metabat2	Bacteria	Proteobacteria	Gammaproteobacteria	Pseudomonadales	Pseudomonadaceae	Pseudomonas_E	Pseudomonas_E monteilii	545	17190	2343664	63.03	4322	50.88	0	0
SGB1294	RS-B056_bin31.metabat2	Bacteria	Bacteroidota	Bacteroidia	Chitinophagales	Chitinophagaceae	Edaphocola	Unassign	349	46714	2824576	44.26	9987	80.31	1.48	0
SGB1295	RS-B056_bins17.concoct	Bacteria	Proteobacteria	Gammaproteobacteria	Pseudomonadales	Pseudomonadaceae	Pseudomonas_E	Unassign	397	109567	5977159	62.8	20195	52.63	3.51	15
SGB1296	RS-B056_bins25.concoct	Bacteria	Proteobacteria	Gammaproteobacteria	Pseudomonadales	Pseudomonadaceae	Pseudomonas	Pseudomonas nitroreducens_A	460	67372	5754684	65.5	15726	73.28	1.72	37
SGB1297	RS-B056_bins9.concoct	Bacteria	Bacteroidota	Bacteroidia	Flavobacteriales	Flavobacteriaceae	Flavobacterium	Unassign	887	50050	4398201	33.38	5701	85.9	2.48	4
SGB1298	RS-B057.bins020.maxbin	Bacteria	Proteobacteria	Gammaproteobacteria	Pseudomonadales	Moraxellaceae	Acinetobacter	Unassign	91	177567	2991056	39.02	60856	78.63	1.98	22
SGB1299	RS-B057_bin109.metabat2	Bacteria	Firmicutes	Bacilli	Paenibacillales	Unassign	Unassign	Unassign	111	266733	4597528	54.95	72810	95.65	1.18	2
SGB1300	RS-B057_bin11.metabat2	Bacteria	Bacteroidota	Bacteroidia	Chitinophagales	Chitinophagaceae	Edaphocola	Unassign	67	301036	5326792	47.87	120311	99.51	0.99	16
SGB1301	RS-B057_bin114.metabat2	Bacteria	Proteobacteria	Alphaproteobacteria	Caulobacterales	Caulobacteraceae	Caulobacter	Unassign	565	68458	5218840	68.33	11516	85.78	5.16	0
SGB1302	RS-B057_bin115.metabat2	Bacteria	Bacteroidota	Bacteroidia	Sphingobacteriales	Sphingobacteriaceae	Sphingobacterium	Sphingobacterium siyangense	459	73001	5280570	39.96	16294	90.26	1.67	5
SGB1303	RS-B057_bin118.metabat2	Bacteria	Bacteroidota	Bacteroidia	Cytophagales	Spirosomaceae	Dyadobacter	Unassign	198	200576	8119210	50.81	57969	98.81	0.15	8
SGB1304	RS-B057_bin138.metabat2	Bacteria	Bacteroidota	Bacteroidia	Sphingobacteriales	Sphingobacteriaceae	Mucilaginibacter	Unassign	786	20144	4411768	42.66	6119	64.9	0.71	0
SGB1305	RS-B057_bin140.metabat2	Bacteria	Actinobacteriota	Actinomycetia	Actinomycetales	Microbacteriaceae	Microbacterium	Unassign	566	20513	3044559	70.67	5934	63.05	1.75	3
SGB1306	RS-B057_bin24.metabat2	Bacteria	Proteobacteria	Gammaproteobacteria	Pseudomonadales	Cellvibrionaceae	Cellvibrio	Unassign	165	202636	5167644	47.43	51383	98.28	0.83	18
SGB1307	RS-B057_bin28.metabat2	Bacteria	Proteobacteria	Alphaproteobacteria	Sphingomonadales	Sphingomonadaceae	Sphingobium	Unassign	225	114696	4292935	63.06	29989	96.11	3.66	0
SGB1308	RS-B057_bin30.metabat2	Bacteria	Proteobacteria	Gammaproteobacteria	Enterobacterales	Enterobacteriaceae	Chania	Unassign	133	159157	3794747	53.61	39538	62.93	0	37
SGB1309	RS-B057_bin35.metabat2	Bacteria	Proteobacteria	Gammaproteobacteria	Burkholderiales	Burkholderiaceae	Variovorax	Unassign	201	237507	7288664	67.11	60880	94.87	7.89	25
SGB1310	RS-B057_bin36.metabat2	Bacteria	Proteobacteria	Alphaproteobacteria	Rhizobiales	Rhizobiaceae	Mycoplana	Unassign	568	24007	3065436	63.52	5750	58.09	2.18	0
SGB1311	RS-B057_bin40.metabat2	Bacteria	Bacteroidota	Bacteroidia	Flavobacteriales	Weeksellaceae	Elizabethkingia	Elizabethkingia ursingii	265	46202	3009249	36.47	16640	73.81	2.15	7
SGB1312	RS-B057_bin47.metabat2	Bacteria	Actinobacteriota	Thermoleophilia	Solirubrobacterales	1970-09-01	Unassign	Unassign	330	35667	2108160	69.61	7626	73.78	2.18	1
SGB1313	RS-B057_bin50.metabat2	Bacteria	Methylomirabilota	Methylomirabilia	Rokubacteriales	CSP1-6	AR37	Unassign	830	32764	4277018	68.2	5406	70.38	6.25	0
SGB1314	RS-B057_bin52.metabat2	Bacteria	Proteobacteria	Gammaproteobacteria	Xanthomonadales	Rhodanobacteraceae	Dyella	Unassign	582	40847	4298999	67.64	8993	56.03	0	15
SGB1315	RS-B057_bin55.metabat2	Bacteria	Bacteroidota	Bacteroidia	Flavobacteriales	Flavobacteriaceae	Flavobacterium	Unassign	153	102221	3394615	36.92	32523	94.67	0.18	0
SGB1316	RS-B057_bin57.metabat2	Bacteria	Bacteroidota	Bacteroidia	Flavobacteriales	Weeksellaceae	Chryseobacterium	Unassign	487	87339	4578220	35.54	12261	58.33	4.31	3
SGB1317	RS-B057_bin79.metabat2	Bacteria	Actinobacteriota	Thermoleophilia	Solirubrobacterales	1970-09-01	Unassign	Unassign	345	20810	1834464	67.18	5743	58.02	0	0
SGB1318	RS-B057_bin87.metabat2	Bacteria	Proteobacteria	Gammaproteobacteria	Pseudomonadales	Moraxellaceae	Acinetobacter	Acinetobacter bereziniae_A	370	50595	3767681	38.16	14103	67.59	0	2
SGB1319	RS-B057_bins113.concoct	Bacteria	Proteobacteria	Gammaproteobacteria	Burkholderiales	Burkholderiaceae	Comamonas_F	Unassign	346	53064	3258950	67.8	10950	66.32	1.4	0
SGB1320	RS-B057_bins12.concoct	Bacteria	Proteobacteria	Alphaproteobacteria	Sphingomonadales	Sphingomonadaceae	Sphingomonas	Sphingomonas kyeonggiensis	188	304728	5165391	66.8	44015	95.99	4.51	7
SGB1321	RS-B057_bins43.concoct	Bacteria	Proteobacteria	Alphaproteobacteria	Sphingomonadales	Sphingomonadaceae	Sphingomonas_D	Unassign	423	96798	5786345	65.13	16904	89.29	3.92	2
SGB1322	RS-B057_bins80.concoct	Bacteria	Proteobacteria	Alphaproteobacteria	Caulobacterales	Caulobacteraceae	Brevundimonas	Unassign	286	89052	3091401	70.66	14535	84.89	0.87	0
SGB1323	RS-B058_bin20.metabat2	Bacteria	Actinobacteriota	Actinomycetia	Actinomycetales	Cellulomonadaceae	Timonella	Unassign	96	193003	3010925	55.38	45553	99.42	0.58	0
SGB1324	RS-B058_bin26.metabat2	Bacteria	Bacteroidota	Bacteroidia	Flavobacteriales	Weeksellaceae	Elizabethkingia	Elizabethkingia miricola	154	160187	4136868	35.72	39943	95.7	1.08	7
SGB1325	RS-B058_bin3.metabat2	Bacteria	Bacteroidota	Bacteroidia	Flavobacteriales	Weeksellaceae	Chryseobacterium	Unassign	197	96117	4167817	33.42	30958	95.76	1.59	8
SGB1326	RS-B058_bin30.metabat2	Bacteria	Actinobacteriota	Actinomycetia	Actinomycetales	Microbacteriaceae	Microbacterium	Unassign	363	52718	3455482	69.63	13028	72.81	0	11
SGB1327	RS-B058_bin32.metabat2	Bacteria	Proteobacteria	Gammaproteobacteria	Burkholderiales	Burkholderiaceae	Variovorax	Unassign	978	23874	4914093	67.36	5477	62.3	2.26	0
SGB1328	RS-B058_bin33.metabat2	Bacteria	Actinobacteriota	Actinomycetia	Actinomycetales	Micrococcaceae	Glutamicibacter	Unassign	414	27491	2848088	55.77	7986	79.95	1.51	1
SGB1329	RS-B058_bin48.metabat2	Bacteria	Proteobacteria	Alphaproteobacteria	Sphingomonadales	Sphingomonadaceae	Sphingobium	Sphingobium yanoikuyae	591	30999	3974679	64.91	7928	85.53	2.23	0
SGB1330	RS-B058_bin52.metabat2	Bacteria	Firmicutes	Bacilli	Exiguobacterales	Exiguobacteraceae	Exiguobacterium_A	Exiguobacterium_A indicum	367	17316	1849561	47.73	5269	65.79	0	0
SGB1331	RS-B059_bin21.metabat2	Bacteria	Proteobacteria	Gammaproteobacteria	Burkholderiales	Burkholderiaceae	Oxalicibacterium	Unassign	322	37435	2745033	52.91	10566	85.27	1.42	9
SGB1332	RS-B059_bin38.metabat2	Bacteria	Proteobacteria	Gammaproteobacteria	Enterobacterales	Enterobacteriaceae	Erwinia	Erwinia aphidicola	87	254417	4150358	56.69	83521	72.05	0	19
SGB1333	RS-B059_bin39.metabat2	Bacteria	Proteobacteria	Gammaproteobacteria	Enterobacterales	Enterobacteriaceae	Buttiauxella	Unassign	413	62660	4955360	49.27	16513	59.98	3.45	6
SGB1334	RS-B059_bin42.metabat2	Bacteria	Verrucomicrobiota	Verrucomicrobiae	Chthoniobacterales	UBA10450	AV40	Unassign	299	14324	1241047	55.3	4244	51.15	3.04	0
SGB1335	RS-B059_bin48.metabat2	Bacteria	Proteobacteria	Gammaproteobacteria	Enterobacterales	Enterobacteriaceae	Klebsiella	Klebsiella huaxiensis	79	259670	4702083	53.98	79911	76.37	5.48	24
SGB1336	RS-B059_bin51.metabat2	Bacteria	Bacteroidota	Bacteroidia	Sphingobacteriales	Sphingobacteriaceae	Sphingobacterium	Sphingobacterium siyangense	241	232595	6059659	39.75	40811	82.93	0	5
SGB1337	RS-B059_bins15.concoct	Bacteria	Proteobacteria	Gammaproteobacteria	Pseudomonadales	Pseudomonadaceae	Pseudomonas_E	Pseudomonas_E kribbensis	934	31703	5031732	60.95	6349	67.06	3.94	53
SGB1338	RS-B059_bins37.concoct	Bacteria	Actinobacteriota	Actinomycetia	Propionibacteriales	Nocardioidaceae	Aeromicrobium	Unassign	397	44169	3186343	70.83	8858	70.46	4.66	0
SGB1339	RS-B060.bins002.maxbin	Bacteria	Proteobacteria	Gammaproteobacteria	Pseudomonadales	Pseudomonadaceae	Pseudomonas_A	Pseudomonas_A stutzeri	39	175908	1274092	62.39	50550	56.43	4.08	0
SGB1340	RS-B060.bins060.maxbin	Bacteria	Proteobacteria	Gammaproteobacteria	Pseudomonadales	Moraxellaceae	Acinetobacter	Acinetobacter seifertii	694	18475	2562697	39.04	3878	55.52	3.98	0
SGB1341	RS-B060_bin12.metabat2	Bacteria	Proteobacteria	Gammaproteobacteria	Burkholderiales	Burkholderiaceae	Comamonas	Unassign	64	212399	3720692	57.68	87060	95.7	1.41	0
SGB1342	RS-B060_bin27.metabat2	Bacteria	Firmicutes_A	Clostridia	Clostridiales	Clostridiaceae	Clostridium_T	Unassign	391	13390	1534828	32.06	3883	50.86	0	0
SGB1343	RS-B060_bin34.metabat2	Bacteria	Bacteroidota	Bacteroidia	Flavobacteriales	Weeksellaceae	Chryseobacterium	Unassign	202	197350	4575302	36.13	34177	95.62	0.25	7
SGB1344	RS-B060_bin5.metabat2	Bacteria	Firmicutes	Bacilli	Paenibacillales	Paenibacillaceae	Paenibacillus	Unassign	650	32167	4422453	45.19	7626	73.1	2.16	1
SGB1345	RS-B060_bin67.metabat2	Bacteria	Proteobacteria	Gammaproteobacteria	Burkholderiales	Burkholderiaceae	Comamonas	Comamonas testosteroni_B	597	28675	3496493	63.29	6623	73.56	2.33	0
SGB1346	RS-B060_bins14.concoct	Bacteria	Firmicutes	Bacilli	Paenibacillales	Paenibacillaceae	Paenibacillus_A	Unassign	584	30670	4086692	39.62	8413	68.97	1.72	0
SGB1347	RS-B060_bins24.concoct	Bacteria	Proteobacteria	Gammaproteobacteria	Burkholderiales	Burkholderiaceae	Comamonas	Unassign	330	109187	4291383	68.49	17542	85.12	3.51	0
SGB1348	RS-B060_bins35.concoct	Bacteria	Firmicutes	Bacilli	Paenibacillales	Paenibacillaceae	Paenibacillus	Unassign	860	21721	4074760	49.05	5725	77.63	7.38	0
SGB1349	RS-B060_bins56.concoct	Bacteria	Proteobacteria	Alphaproteobacteria	Rhizobiales	Rhizobiaceae	Agrobacterium	Unassign	793	15779	3290347	53.89	4399	64.59	2.41	0
SGB1350	RS-B060_bins58.concoct	Bacteria	Firmicutes_A	Clostridia	Lachnospirales	Lachnospiraceae	Lachnotalea	Unassign	187	98311	3923853	34.58	35534	95.89	1.1	0
SGB1351	RS-B060_bins62.concoct	Bacteria	Bacteroidota	Bacteroidia	Flavobacteriales	Flavobacteriaceae	Flavobacterium	Unassign	482	14186	1771653	35.01	3833	68.19	0.56	0
SGB1352	RS-B062_bin22.metabat2	Bacteria	Proteobacteria	Gammaproteobacteria	Enterobacterales	Enterobacteriaceae	Pantoea	Pantoea cancerogena_A	337	141627	4989898	53.95	23057	98.14	1.04	33
SGB1353	RS-B062_bin28.metabat2	Bacteria	Proteobacteria	Alphaproteobacteria	Sphingomonadales	Sphingomonadaceae	Sphingobium	Sphingobium yanoikuyae	564	35691	2811898	64.97	5280	61.49	0.36	0
SGB1354	RS-B062_bin31.metabat2	Bacteria	Acidobacteriota	Acidobacteriae	Acidoferrales	UBA7541	Acidoferrum	Unassign	613	11326	2561375	57.66	4248	52.18	1.28	0
SGB1355	RS-B064.bins006.maxbin	Bacteria	Proteobacteria	Gammaproteobacteria	Pseudomonadales	Moraxellaceae	Acinetobacter	Unassign	604	32869	2400871	41.42	4156	57.87	1.9	0
SGB1356	RS-B064_bin19.metabat2	Bacteria	Firmicutes	Bacilli	Exiguobacterales	Exiguobacteraceae	Exiguobacterium_A	Exiguobacterium_A sp001423965	195	13934	858106	47.52	4424	52.75	0	0
SGB1357	RS-B064_bin29.metabat2	Bacteria	Verrucomicrobiota	Verrucomicrobiae	Chthoniobacterales	UBA10450	Udaeobacter	Unassign	426	12711	1698321	54.44	3962	53.99	1.66	0
SGB1358	RS-B065_bin1.metabat2	Bacteria	Patescibacteria	Saccharimonadia	Saccharimonadales	UBA1547	UBA6175	UBA6175 sp001897295	4	452140	921652	49.32	275677	65.1	0	0
SGB1359	RS-B065_bin11.metabat2	Bacteria	Verrucomicrobiota	Verrucomicrobiae	Chthoniobacterales	UBA10450	Udaeobacter	Unassign	448	29032	2623643	54.54	6430	81.33	4.32	0
SGB1360	RS-B065_bin19.metabat2	Bacteria	Proteobacteria	Gammaproteobacteria	Burkholderiales	Burkholderiaceae	Paraburkholderia	Unassign	319	212130	9040840	61.5	45927	99.12	1.94	16
SGB1361	RS-B065_bin2.metabat2	Bacteria	Proteobacteria	Gammaproteobacteria	Burkholderiales	Burkholderiaceae	Aquabacterium	Unassign	53	283337	3683815	67.31	104284	79.93	0	0
SGB1362	RS-B065_bin29.metabat2	Bacteria	Bdellovibrionota	Bacteriovoracia	Bacteriovoracales	Bacteriovoracaceae	Unassign	Unassign	72	174973	2974558	39.54	63207	90.33	0.89	1
SGB1363	RS-B065_bin4.metabat2	Bacteria	Acidobacteriota	Blastocatellia	Pyrinomonadales	Pyrinomonadaceae	PSRF01	Unassign	529	72629	7119662	53.74	18569	93.6	5.37	80
SGB1364	RS-B065_bin9.metabat2	Bacteria	Nitrospirota	Nitrospiria	Nitrospirales	Nitrospiraceae	Nitrospira_C	Unassign	450	20570	2513558	55.87	6103	68.51	3.03	0
SGB1365	RS-B066_bin1.metabat2	Bacteria	Proteobacteria	Gammaproteobacteria	Pseudomonadales	Moraxellaceae	Acinetobacter	Acinetobacter kanungonis	29	266453	2383797	42.27	194175	68.38	0	0
SGB1366	RS-B066_bin13.metabat2	Bacteria	Proteobacteria	Gammaproteobacteria	Pseudomonadales	Pseudomonadaceae	Pseudomonas_A	Pseudomonas_A stutzeri	11	765652	2584668	64.68	720318	61.48	0.32	42
SGB1367	RS-B066_bin19.metabat2	Bacteria	Patescibacteria	Saccharimonadia	Saccharimonadales	UBA4665	RGVC01	Unassign	19	147430	850757	51.75	60852	70.96	0.99	0
SGB1368	RS-B066_bin9.metabat2	Bacteria	Proteobacteria	Gammaproteobacteria	Pseudomonadales	Moraxellaceae	Acinetobacter	Acinetobacter johnsonii	137	100995	3255932	41.52	35949	97.73	0.27	9
SGB1369	RS-B067_bin19.metabat2	Bacteria	Proteobacteria	Gammaproteobacteria	Enterobacterales	Enterobacteriaceae	Pantoea	Pantoea endophytica	200	181706	4830073	55.07	42478	95.18	0.34	26
SGB1370	RS-B067_bin8.metabat2	Bacteria	Chloroflexota	Ktedonobacteria	Ktedonobacterales	Ktedonobacteraceae	Unassign	Unassign	479	16933	2467334	47.36	5295	51.02	0	7
SGB1371	RS-B068.bins005.maxbin	Bacteria	Gemmatimonadota	Gemmatimonadetes	Gemmatimonadales	Gemmatimonadaceae	Unassign	Unassign	74	213916	2298643	67.32	58181	73.11	1.1	0
SGB1372	RS-B068.bins006.maxbin	Bacteria	Acidobacteriota	Acidobacteriae	Acidoferrales	UBA7541	Unassign	Unassign	37	232163	2153717	58.65	92453	54.55	0	0
SGB1373	RS-B068_bin118.metabat2	Bacteria	Acidobacteriota	Acidobacteriae	Acidoferrales	UBA7541	Unassign	Unassign	392	35360	2819126	60.78	8670	66.78	1.76	0
SGB1374	RS-B068_bin14.metabat2	Bacteria	Acidobacteriota	Acidobacteriae	Acidoferrales	UBA7541	Acidoferrum	Unassign	50	769256	4503958	56.35	171898	82.38	2.99	0
SGB1375	RS-B068_bin20.metabat2	Bacteria	Acidobacteriota	Acidobacteriae	Bryobacterales	Bryobacteraceae	Palsa-187	Unassign	539	55092	4921247	60.92	11744	89.81	3.26	0
SGB1376	RS-B068_bin4.metabat2	Bacteria	Acidobacteriota	Acidobacteriae	Acidoferrales	UBA7541	Unassign	Unassign	343	198067	5370684	60.46	24751	91.08	7.63	48
SGB1377	RS-B068_bin40.metabat2	Bacteria	Proteobacteria	Alphaproteobacteria	Micropepsales	Micropepsaceae	Rhizomicrobium	Unassign	475	26840	2467711	61.99	5691	71.27	2.1	0
SGB1378	RS-B068_bin45.metabat2	Bacteria	Acidobacteriota	Acidobacteriae	Acidobacteriales	SbA1	KAN-5	Unassign	183	110105	3956561	51.47	28608	92.04	2.14	1
SGB1379	RS-B068_bin52.metabat2	Bacteria	Chloroflexota	Ktedonobacteria	Ktedonobacterales	Unassign	Unassign	Unassign	586	30801	4143217	67.49	8600	85.06	3.41	0
SGB1380	RS-B068_bin72.metabat2	Bacteria	Planctomycetota	Phycisphaerae	WQYP01	WQYP01	WQYP01	Unassign	299	127252	4189683	61.38	19925	93.18	1.14	0
SGB1381	RS-B068_bin73.metabat2	Bacteria	Acidobacteriota	Acidobacteriae	Acidoferrales	UBA7541	Palsa-360	Unassign	233	99160	4579191	60.23	30157	88.46	1.71	1
SGB1382	RS-B068_bin8.metabat2	Bacteria	Proteobacteria	Gammaproteobacteria	REEB76	REEB76	Unassign	Unassign	41	247663	2757430	64.47	94033	94.2	1.88	5
SGB1383	RS-B068_bin86.metabat2	Bacteria	Proteobacteria	Gammaproteobacteria	REEB76	REEB76	REEB76	Unassign	29	345720	2552127	60.62	139008	95.38	1.9	5
SGB1384	RS-B068_bin90.metabat2	Bacteria	Acidobacteriota	Acidobacteriae	Acidobacteriales	Acidobacteriaceae	Terracidiphilus	Unassign	115	239866	5679287	60.58	94974	93.97	3.83	1
SGB1385	RS-B068_bin92.metabat2	Bacteria	Proteobacteria	Gammaproteobacteria	Burkholderiales	Casimicrobiaceae	VBCG01	Unassign	382	26761	1843249	66.51	5171	57.8	1.18	0
SGB1386	RS-B068_bin99.metabat2	Bacteria	Acidobacteriota	Acidobacteriae	Bryobacterales	Bryobacteraceae	PALSA-129	Unassign	128	347198	8189167	64.11	100820	98.25	7.89	1
SGB1387	RS-B068_bins55.concoct	Bacteria	Proteobacteria	Alphaproteobacteria	ATCC43930	Stellaceae	Unassign	Unassign	692	67999	4985727	68.76	8605	78.11	2.39	7
SGB1388	RS-B068_bins59.concoct	Bacteria	Chloroflexota	Ktedonobacteria	Ktedonobacterales	JACDGC01	Unassign	Unassign	926	20616	3066255	62.75	3309	57.87	4.26	0
SGB1389	RS-B069.bins013.maxbin	Bacteria	Acidobacteriota	Acidobacteriae	Acidobacteriales	Acidobacteriaceae	Acidobacterium_A	Unassign	94	541925	4940044	56.72	133394	97.25	6.41	7
SGB1390	RS-B069.bins048.maxbin	Bacteria	Eremiobacterota	Eremiobacteria	Baltobacterales	Baltobacteraceae	JAFAMS01	Unassign	37	487581	3456203	61.35	453829	98.28	6.58	2
SGB1391	RS-B069_bin105.metabat2	Bacteria	Acidobacteriota	Acidobacteriae	Acidoferrales	UBA7541	Palsa-295	Unassign	74	197722	3486516	63.26	78369	92.79	2.56	1
SGB1392	RS-B069_bin106.metabat2	Bacteria	Omnitrophota	Koll11	UBA10015	GCA-002753745	JABDGZ01	Unassign	84	86771	1820691	47.61	28116	82.26	1.08	0
SGB1393	RS-B069_bin110.metabat2	Bacteria	Proteobacteria	Alphaproteobacteria	Micropepsales	Micropepsaceae	CAIYRG01	Unassign	315	127073	4167444	61.2	18370	96.74	1.3	2
SGB1394	RS-B069_bin111.metabat2	Bacteria	Acidobacteriota	Acidobacteriae	Acidobacteriales	Acidobacteriaceae	Tous-C9LFEB	Unassign	322	150332	4736411	59.16	23553	84.43	1.72	1
SGB1395	RS-B069_bin113.metabat2	Bacteria	Armatimonadota	Chthonomonadetes	Chthonomonadales	Chthonomonadaceae	Unassign	Unassign	287	193423	5726785	59.78	27169	92.78	0.1	0
SGB1396	RS-B069_bin115.metabat2	Bacteria	Patescibacteria	Saccharimonadia	Saccharimonadales	UBA4665	Unassign	Unassign	62	41146	732837	49.82	15169	51.71	0	0
SGB1397	RS-B069_bin12.metabat2	Bacteria	Proteobacteria	Alphaproteobacteria	Rhizobiales	Xanthobacteraceae	VAZQ01	Unassign	390	106566	6393355	64.62	30249	95.56	7.2	12
SGB1398	RS-B069_bin120.metabat2	Bacteria	Deinococcota	Deinococci	Deinococcales	Deinococcaceae	Deinococcus	Deinococcus soli	323	56962	3461070	70.45	14607	92.87	0.43	5
SGB1399	RS-B069_bin124.metabat2	Bacteria	Acidobacteriota	Acidobacteriae	Acidoferrales	UBA7541	Palsa-295	Unassign	391	59544	4837970	57.75	16885	51.72	0	41
SGB1400	RS-B069_bin138.metabat2	Bacteria	Armatimonadota	Chthonomonadetes	Chthonomonadales	Chthonomonadaceae	CAIXIX01	Unassign	501	49097	4764560	59.72	11513	92.21	1.49	0
SGB1401	RS-B069_bin139.metabat2	Bacteria	Proteobacteria	Alphaproteobacteria	Micropepsales	Micropepsaceae	Rhizomicrobium	Unassign	102	265469	3461448	61.31	92394	96.8	2.17	1
SGB1402	RS-B069_bin14.metabat2	Bacteria	Desulfobacterota_B	Binatia	Binatales	Binataceae	JADMIL01	Unassign	330	78783	3714039	63.2	14957	91.73	3.78	7
SGB1403	RS-B069_bin143.metabat2	Bacteria	Chloroflexota	Dehalococcoidia	DSGV01	DSGV01	Unassign	Unassign	765	15873	3376000	66.12	4506	58.2	3.96	0
SGB1404	RS-B069_bin145.metabat2	Bacteria	Planctomycetota	Planctomycetia	Pirellulales	PNKZ01	Unassign	Unassign	1019	29782	6661888	63.62	7547	79	1.15	2
SGB1405	RS-B069_bin17.metabat2	Bacteria	Acidobacteriota	Acidobacteriae	Acidoferrales	UBA7541	Palsa-360	Unassign	76	233836	4091118	58.76	99602	87.18	0	0
SGB1406	RS-B069_bin20.metabat2	Bacteria	Verrucomicrobiota	Verrucomicrobiae	Pedosphaerales	UBA11358	UBA7542	Unassign	137	153649	4356452	57.12	49437	96.52	3.55	15
SGB1407	RS-B069_bin22.metabat2	Bacteria	Acidobacteriota	Acidobacteriae	Acidobacteriales	SCQP01	Unassign	Unassign	118	192510	4143803	59.99	69461	88.46	0.85	2
SGB1408	RS-B069_bin30.metabat2	Bacteria	Proteobacteria	Alphaproteobacteria	ATCC43930	Stellaceae	AP-15	Unassign	291	92843	4819779	64.76	24917	87.41	6.87	1
SGB1409	RS-B069_bin32.metabat2	Bacteria	Actinobacteriota	Actinomycetia	Streptosporangiales	Streptosporangiaceae	Chersky-822	Unassign	343	107677	6436086	68.26	25269	97.46	4.55	110
SGB1410	RS-B069_bin37.metabat2	Bacteria	Desulfobacterota_B	Binatia	Binatales	Binataceae	Unassign	Unassign	552	21741	3122262	60.64	6169	63.76	2.26	0
SGB1411	RS-B069_bin41.metabat2	Bacteria	Planctomycetota	Planctomycetia	Pirellulales	Unassign	Unassign	Unassign	222	118555	5845431	58.52	37341	97.7	0	2
SGB1412	RS-B069_bin43.metabat2	Bacteria	Acidobacteriota	Acidobacteriae	Acidobacteriales	SbA1	Sulfotelmatobacter	Unassign	139	181737	5201222	59.59	75329	94.44	4.94	18
SGB1413	RS-B069_bin44.metabat2	Bacteria	Actinobacteriota	Actinomycetia	Mycobacteriales	Mycobacteriaceae	Mycobacterium	Unassign	785	21938	4274661	64.65	5867	73.2	3.28	15
SGB1414	RS-B069_bin46.metabat2	Bacteria	Nitrospirota	Nitrospiria	Nitrospirales	Nitrospiraceae	Unassign	Unassign	310	39694	2358962	54.82	8551	79.53	3.64	0
SGB1415	RS-B069_bin48.metabat2	Bacteria	Acidobacteriota	Acidobacteriae	Acidobacteriales	SbA1	JABCZH01	Unassign	442	93990	2983998	58.46	7356	51.01	1.14	0
SGB1416	RS-B069_bin53.metabat2	Bacteria	Proteobacteria	Alphaproteobacteria	Acetobacterales	Acetobacteraceae	Unassign	Unassign	605	74104	5073480	64.01	10706	91.03	3.25	1
SGB1417	RS-B069_bin60.metabat2	Bacteria	Planctomycetota	Planctomycetia	Pirellulales	Unassign	Unassign	Unassign	458	36745	3638174	55.97	9095	82.69	1.79	2
SGB1418	RS-B069_bin63.metabat2	Bacteria	Acidobacteriota	Acidobacteriae	Acidobacteriales	Acidobacteriaceae	Terracidiphilus	Unassign	273	112037	5498262	62.42	29022	93.71	5.6	1
SGB1419	RS-B069_bin65.metabat2	Bacteria	Acidobacteriota	Acidobacteriae	Acidoferrales	UBA7541	Palsa-295	Unassign	114	182855	4942975	58.88	73247	94.02	3.42	0
SGB1420	RS-B069_bin71.metabat2	Bacteria	Proteobacteria	Alphaproteobacteria	ATCC43930	Stellaceae	AP-15	Unassign	481	92109	3828389	66.22	10798	81.98	2.41	0
SGB1421	RS-B069_bin72.metabat2	Bacteria	Acidobacteriota	Thermoanaerobaculia	UBA5066	Gp7-AA6	Unassign	Unassign	500	24658	2522172	64.56	5447	65.19	1.71	0
SGB1422	RS-B069_bin77.metabat2	Bacteria	Acidobacteriota	Acidobacteriae	Acidoferrales	UBA7541	Unassign	Unassign	48	280355	4246453	59.73	132914	84.62	2.56	0
SGB1423	RS-B069_bin83.metabat2	Bacteria	Acidobacteriota	Acidobacteriae	UBA7540	UBA7540	Unassign	Unassign	248	134521	4647011	55.54	27994	94.66	5.02	1
SGB1424	RS-B069_bin86.metabat2	Bacteria	Actinobacteriota	Acidimicrobiia	Acidimicrobiales	RAAP-2	RAAP-2	Unassign	268	27425	1448861	72.37	5899	60.59	0.43	0
SGB1425	RS-B069_bin90.metabat2	Bacteria	Acidobacteriota	Vicinamibacteria	Vicinamibacterales	2-12-FULL-66-21	Unassign	Unassign	151	197516	5391443	65.37	60474	98.29	7.74	0
SGB1426	RS-B069_bin92.metabat2	Bacteria	Verrucomicrobiota	Verrucomicrobiae	Pedosphaerales	UBA11358	UBA7542	Unassign	349	39003	3268576	57.65	11429	89.96	4.22	0
SGB1427	RS-B069_bin98.metabat2	Bacteria	Acidobacteriota	Acidobacteriae	Bryobacterales	Bryobacteraceae	Palsa-187	Unassign	56	380872	5727510	62.28	177730	97.39	3.48	25
SGB1428	RS-B069_bin99.metabat2	Bacteria	Verrucomicrobiota	Verrucomicrobiae	Pedosphaerales	UBA11358	Unassign	Unassign	121	132837	4503791	54.69	54622	98.65	3.95	1
SGB1429	RS-B069_bins104.concoct	Bacteria	Planctomycetota	Planctomycetia	Planctomycetales	Planctomycetaceae	Unassign	Unassign	328	84792	5857807	57.97	26841	98.88	0	4
SGB1430	RS-B069_bins113.concoct	Bacteria	Actinobacteriota	Thermoleophilia	Gaiellales	Unassign	Unassign	Unassign	413	29742	2742556	71	7641	83.84	1.72	2
SGB1431	RS-B069_bins18.concoct	Bacteria	Desulfobacterota_B	Binatia	Binatales	Binataceae	Unassign	Unassign	208	69027	3969938	65.59	28891	92.66	2.57	11
SGB1432	RS-B069_bins20.concoct	Bacteria	Proteobacteria	Alphaproteobacteria	ATCC43930	Stellaceae	Unassign	Unassign	148	377347	4832831	68.77	47518	93.24	4.57	2
SGB1433	RS-B069_bins31.concoct	Bacteria	Planctomycetota	Phycisphaerae	Tepidisphaerales	Tepidisphaeraceae	Unassign	Unassign	664	18935	2840702	58.03	4668	55.27	0	0
SGB1434	RS-B069_bins83.concoct	Bacteria	Acidobacteriota	Acidobacteriae	Bryobacterales	Bryobacteraceae	Unassign	Unassign	63	318945	6594623	62.73	166724	96.52	2.61	0
SGB1435	RS-B069_bins93.concoct	Bacteria	Planctomycetota	Planctomycetia	Gemmatales	Gemmataceae	Unassign	Unassign	920	52871	8120849	61.56	10928	66	3.41	26
SGB1436	RS-B070_bin16.metabat2	Bacteria	Proteobacteria	Gammaproteobacteria	Steroidobacterales	Steroidobacteraceae	13-2-20CM-66-19	Unassign	1355	51611	10041885	62.4	9735	66.54	1.72	1
SGB1437	RS-B070_bin6.metabat2	Bacteria	Proteobacteria	Alphaproteobacteria	Caulobacterales	Caulobacteraceae	Brevundimonas	Unassign	423	47623	2330851	66.66	5684	53.79	1.72	0
SGB1438	RS-B070_bin7.metabat2	Bacteria	Proteobacteria	Gammaproteobacteria	Steroidobacterales	Steroidobacteraceae	13-2-20CM-66-19	Unassign	153	182130	4568839	61.9	52515	96.2	4.32	2
SGB1439	RS-B071_bin9.metabat2	Bacteria	Proteobacteria	Alphaproteobacteria	Sphingomonadales	Sphingomonadaceae	Novosphingobium	Unassign	356	60598	3515172	67.09	12476	89.5	3.59	0
SGB1440	RS-B071_bins11.concoct	Bacteria	Proteobacteria	Alphaproteobacteria	Rhizobiales	Xanthobacteraceae	VAZQ01	Unassign	715	14726	2370851	65.41	3325	50.92	2	0
SGB1441	RS-B072.bins044.maxbin	Bacteria	Proteobacteria	Gammaproteobacteria	Pseudomonadales	Pseudomonadaceae	Pseudomonas_E	Unassign	1683	52802	6534077	66.04	4025	81.57	2.1	3
SGB1442	RS-B072.bins046.maxbin	Bacteria	Proteobacteria	Gammaproteobacteria	Burkholderiales	Burkholderiaceae	Comamonas	Unassign	661	279441	4602667	55.6	10766	95.79	7.1	0
SGB1443	RS-B072.bins093.maxbin	Bacteria	Proteobacteria	Gammaproteobacteria	Pseudomonadales	Pseudomonadaceae	Pseudomonas_E	Unassign	3096	46255	14227346	63.61	5190	89.84	1.64	62
SGB1444	RS-B072.bins167.maxbin	Bacteria	Proteobacteria	Gammaproteobacteria	Burkholderiales	Burkholderiaceae	LMDS01	Unassign	615	22914	2876927	70.28	5324	79.49	1.36	0
SGB1445	RS-B072_bin13.metabat2	Bacteria	Actinobacteriota	Actinomycetia	Mycobacteriales	Jatrophihabitantaceae	Unassign	Unassign	282	73262	2796759	66.67	14717	84.45	1.71	5
SGB1446	RS-B072_bin133.metabat2	Bacteria	Methylomirabilota	Methylomirabilia	Rokubacteriales	CSP1-6	Unassign	Unassign	1001	26525	5429598	68.99	6101	66.89	4.59	3
SGB1447	RS-B072_bin139.metabat2	Bacteria	Bacteroidota	Bacteroidia	Flavobacteriales	Flavobacteriaceae	Flavobacterium	Unassign	605	50853	5977212	35.82	12628	69.98	3.45	8
SGB1448	RS-B072_bin143.metabat2	Bacteria	Proteobacteria	Alphaproteobacteria	Sphingomonadales	Sphingomonadaceae	Novosphingobium	Unassign	130	153031	3412542	65.02	39733	84.79	7.29	21
SGB1449	RS-B072_bin147.metabat2	Bacteria	Proteobacteria	Alphaproteobacteria	Rhizobiales	Aestuariivirgaceae	Unassign	Unassign	404	20653	2039481	65.44	5424	63.05	3.12	0
SGB1450	RS-B072_bin177.metabat2	Bacteria	Proteobacteria	Alphaproteobacteria	Caulobacterales	TH1-2	Terricaulis	Unassign	372	61721	2564172	65.73	8297	80.88	2.62	3
SGB1451	RS-B072_bin190.metabat2	Bacteria	Bacteroidota	Bacteroidia	Flavobacteriales	Weeksellaceae	Chryseobacterium	Unassign	618	30991	3475593	34.15	5965	73.38	4.9	2
SGB1452	RS-B072_bin223.metabat2	Bacteria	Bacteroidota	Bacteroidia	Chitinophagales	Chitinophagaceae	JAFDYH01	Unassign	189	230570	6331213	41.76	53428	99.01	3.2	6
SGB1453	RS-B072_bin226.metabat2	Bacteria	Gemmatimonadota	Gemmatimonadetes	Gemmatimonadales	GWC2-71-9	JAGGAG01	Unassign	342	68016	3021367	67.77	10958	77.86	6.04	17
SGB1454	RS-B072_bin238.metabat2	Bacteria	Proteobacteria	Gammaproteobacteria	UBA6522	UBA6522	FEN-1219	Unassign	566	29779	3382362	65.94	6683	64.14	0	0
SGB1455	RS-B072_bin240.metabat2	Bacteria	Proteobacteria	Alphaproteobacteria	Rhizobiales	Beijerinckiaceae	Bosea	Unassign	236	137068	5123384	66.14	40185	89.75	9.61	0
SGB1456	RS-B072_bin247.metabat2	Bacteria	Actinobacteriota	Actinomycetia	Mycobacteriales	Mycobacteriaceae	Mycobacterium	Unassign	236	135428	5929421	65.66	38923	96.88	1.21	35
SGB1457	RS-B072_bin25.metabat2	Bacteria	Patescibacteria	Saccharimonadia	Saccharimonadales	JACDBH01	JACDBH01	Unassign	22	118229	1004910	52.66	69168	64.53	2.14	0
SGB1458	RS-B072_bin265.metabat2	Bacteria	Actinobacteriota	Acidimicrobiia	Acidimicrobiales	Ilumatobacteraceae	WLMZ01	Unassign	315	49927	3475646	67.92	15478	86.97	2.14	0
SGB1459	RS-B072_bin277.metabat2	Bacteria	Actinobacteriota	Acidimicrobiia	Acidimicrobiales	Ilumatobacteraceae	Unassign	Unassign	186	177019	3429768	70	25659	97.53	4.06	6
SGB1460	RS-B072_bin281.metabat2	Bacteria	Bacteroidota	Bacteroidia	Chitinophagales	Chitinophagaceae	Unassign	Unassign	594	24488	3656699	40.8	6628	50.83	1.72	0
SGB1461	RS-B072_bin285.metabat2	Bacteria	Bacteroidota	Bacteroidia	Flavobacteriales	Blattabacteriaceae	Unassign	Unassign	28	25294	287979	30.53	14274	57.52	0	0
SGB1462	RS-B072_bin29.metabat2	Bacteria	Proteobacteria	Alphaproteobacteria	Sphingomonadales	Sphingomonadaceae	Sphingomonas	Unassign	284	188660	5441433	67.14	34628	89.68	9.46	7
SGB1463	RS-B072_bin294.metabat2	Bacteria	Acidobacteriota	Thermoanaerobaculia	UBA5066	Gp7-AA6	Gp7-AA6	Unassign	564	19082	2439077	68.93	4408	55.66	0	0
SGB1464	RS-B072_bin3.metabat2	Bacteria	Proteobacteria	Alphaproteobacteria	Caulobacterales	Caulobacteraceae	Phenylobacterium	Unassign	602	48547	4864680	69.91	10021	50.17	3.45	0
SGB1465	RS-B072_bin315.metabat2	Bacteria	Actinobacteriota	Acidimicrobiia	Acidimicrobiales	Unassign	Unassign	Unassign	310	81248	4255579	71.54	20958	92.64	2.56	8
SGB1466	RS-B072_bin35.metabat2	Bacteria	Proteobacteria	Gammaproteobacteria	Nevskiales	Nevskiaceae	Solimonas	Unassign	537	31396	3157482	66.02	6568	76.79	2.59	0
SGB1467	RS-B072_bin46.metabat2	Bacteria	Proteobacteria	Alphaproteobacteria	Rhizobiales	Devosiaceae	Devosia_A	Unassign	332	79532	3155371	63.68	14848	71.03	7.24	0
SGB1468	RS-B072_bin56.metabat2	Bacteria	Proteobacteria	Alphaproteobacteria	Sphingomonadales	Sphingomonadaceae	Sphingobium	Unassign	384	41601	2632787	63.05	8197	51.02	1.72	7
SGB1469	RS-B072_bin74.metabat2	Bacteria	Proteobacteria	Gammaproteobacteria	Steroidobacterales	Steroidobacteraceae	ZC4RG30	Unassign	391	46436	3299133	68.14	10696	79.81	9.65	0
SGB1470	RS-B072_bin87.metabat2	Bacteria	Proteobacteria	Alphaproteobacteria	Rhizobiales	Beijerinckiaceae	Methylobacterium	Methylobacterium populi_A	223	109749	5204287	69.43	37256	87.92	1.67	6
SGB1471	RS-B072_bins108.concoct	Bacteria	Proteobacteria	Gammaproteobacteria	Burkholderiales	Burkholderiaceae	Rhizobacter	Unassign	542	40057	3767625	67.23	8468	75.57	1.04	1
SGB1472	RS-B072_bins11.concoct	Bacteria	Proteobacteria	Gammaproteobacteria	Burkholderiales	Burkholderiaceae	Comamonas	Comamonas terrigena	717	16859	2863927	65.7	4306	57.92	3.45	0
SGB1473	RS-B072_bins116.concoct	Bacteria	Patescibacteria	Saccharimonadia	Saccharimonadales	JACDBH01	Unassign	Unassign	174	22662	731322	47.35	4804	53.18	2.78	0
SGB1474	RS-B072_bins25.concoct	Bacteria	Acidobacteriota	Acidobacteriae	Acidobacteriales	Acidobacteriaceae	Edaphobacter	Unassign	629	30009	3457928	59.81	6247	57.56	2.91	0
SGB1475	RS-B072_bins39.concoct	Bacteria	Proteobacteria	Gammaproteobacteria	Pseudomonadales	Moraxellaceae	Acinetobacter	Acinetobacter johnsonii	124	191651	3855002	40.94	47490	100	3.37	18
SGB1476	RS-B072_bins44.concoct	Bacteria	Bacteroidota	Bacteroidia	Chitinophagales	Saprospiraceae	JADJLQ01	Unassign	816	19551	3454302	43.46	4565	65.46	1.98	0
SGB1477	RS-B072_bins75.concoct	Bacteria	Proteobacteria	Gammaproteobacteria	Burkholderiales	Burkholderiaceae	Unassign	Unassign	365	21365	2339107	64.15	7473	55.09	3.7	0
SGB1478	RS-B072_bins88.concoct	Bacteria	Proteobacteria	Gammaproteobacteria	Burkholderiales	Burkholderiaceae	Comamonas	Comamonas testosteroni_B	220	126156	5318729	62.47	37464	94.63	9.71	3
SGB1479	RS-B073.bins049.maxbin	Bacteria	Verrucomicrobiota	Verrucomicrobiae	Chthoniobacterales	UBA10450	AV40	Unassign	364	9221	1226206	55.93	3403	52.47	2.25	0
SGB1480	RS-B073_bin1.metabat2	Bacteria	Proteobacteria	Alphaproteobacteria	Unassign	Unassign	Unassign	Unassign	411	15969	1844281	64.57	4572	55.8	2.49	0
SGB1481	RS-B073_bin16.metabat2	Bacteria	Actinobacteriota	Thermoleophilia	Gaiellales	Gaiellaceae	13-2-20CM-68-14	Unassign	395	16761	1787773	68.16	4684	54.28	2.46	0
SGB1482	RS-B073_bin18.metabat2	Bacteria	Proteobacteria	Alphaproteobacteria	Sphingomonadales	Sphingomonadaceae	Tardibacter	Unassign	231	62791	2532919	64.24	15822	89.38	1.52	1
SGB1483	RS-B073_bin19.metabat2	Bacteria	Actinobacteriota	Actinomycetia	Mycobacteriales	Mycobacteriaceae	Mycobacterium	Unassign	221	194876	6471756	65.05	48676	97.56	1.3	15
SGB1484	RS-B073_bin28.metabat2	Bacteria	Proteobacteria	Alphaproteobacteria	Caulobacterales	TH1-2	Terricaulis	Unassign	550	15668	2474486	62.6	4622	51.67	0.49	0
SGB1485	RS-B073_bin4.metabat2	Bacteria	Actinobacteriota	Thermoleophilia	Solirubrobacterales	Solirubrobacteraceae	Unassign	Unassign	26	481484	2395805	64.77	191923	98.72	0.85	0
SGB1486	RS-B073_bin49.metabat2	Bacteria	Proteobacteria	Alphaproteobacteria	Rhizobiales	Beijerinckiaceae	28-YEA-48	Unassign	129	146423	3648248	61.74	43339	94.37	0.63	0
SGB1487	RS-B074_bin18.metabat2	Bacteria	Actinobacteriota	Actinomycetia	Streptomycetales	Streptomycetaceae	Streptomyces	Unassign	996	23936	4480553	70.13	4604	63.78	0.64	0
SGB1488	RS-B075_bin4.metabat2	Bacteria	Proteobacteria	Alphaproteobacteria	Rhizobiales	Xanthobacteraceae	Pseudolabrys	Unassign	681	43053	4192589	58.97	7098	55.33	1.72	0
SGB1489	RS-B076_bin9.metabat2	Bacteria	Acidobacteriota	Acidobacteriae	Bryobacterales	Bryobacteraceae	Unassign	Unassign	1049	20227	4534256	61.14	4415	68.2	4.29	0
SGB1490	RS-B077_bin24.metabat2	Bacteria	Proteobacteria	Alphaproteobacteria	Sphingomonadales	Sphingomonadaceae	Sphingomonas	Sphingomonas zeae	125	170204	3670147	66.05	50572	99.66	0.53	8
SGB1491	RS-B080.bins012.maxbin	Bacteria	Actinobacteriota	Thermoleophilia	Solirubrobacterales	1970-09-01	VAYN01	Unassign	139	70042	1831688	70.5	20517	72.92	2.01	0
SGB1492	RS-B080.bins022.maxbin	Bacteria	Firmicutes	Bacilli	Bacillales_B	DSM-18226	Neobacillus	Neobacillus sp000686805	570	15947	1925316	39.39	3398	50.34	0	3
SGB1493	RS-B080_bin17.metabat2	Bacteria	Proteobacteria	Gammaproteobacteria	Burkholderiales	Burkholderiaceae	Acidovorax	Unassign	595	14872	2819464	66.13	4949	59.61	1.2	0
SGB1494	RS-B080_bin27.metabat2	Bacteria	Actinobacteriota	Thermoleophilia	Solirubrobacterales	1970-09-01	VAYN01	Unassign	257	57772	2558364	71.1	13419	87	5.17	8
SGB1495	RS-B080_bin35.metabat2	Bacteria	Actinobacteriota	Acidimicrobiia	UBA5794	ZC4RG35	MA-ANB-1	Unassign	299	18415	1279498	63.15	4275	51.67	1.03	0
SGB1496	RS-B080_bin36.metabat2	Bacteria	Proteobacteria	Alphaproteobacteria	Sphingomonadales	Sphingomonadaceae	Sphingomonas_H	Unassign	350	42547	2834831	65.13	10206	85.93	2.34	0
SGB1497	RS-B080_bins33.concoct	Bacteria	Acidobacteriota	Blastocatellia	RBC074	RBC074	JAFDVL01	Unassign	1527	15328	5796228	54.14	4015	60.43	2.61	0
SGB1498	RS-B082_bin18.metabat2	Bacteria	Proteobacteria	Gammaproteobacteria	Xanthomonadales	Rhodanobacteraceae	Rudaea	Unassign	583	18466	2510449	64.69	4386	51.47	2.3	0
SGB1499	RS-B082_bin26.metabat2	Bacteria	Proteobacteria	Alphaproteobacteria	Sphingomonadales	Sphingomonadaceae	Sphingopyxis	Sphingopyxis sp001047015	598	48093	4132581	63.47	8312	82.34	4.87	4
SGB1500	RS-B082_bin28.metabat2	Bacteria	Bacteroidota	Bacteroidia	Cytophagales	Spirosomaceae	Dyadobacter	Unassign	416	133180	8801047	49.13	31323	97.1	0.6	8
SGB1501	RS-B082_bin40.metabat2	Bacteria	Chloroflexota	Ktedonobacteria	Ktedonobacterales	Ktedonobacteraceae	Unassign	Unassign	465	19946	3017220	47.64	7096	68.98	1.98	3
SGB1502	RS-B082_bin48.metabat2	Bacteria	Actinobacteriota	Actinomycetia	Actinomycetales	Microbacteriaceae	Microbacterium	Unassign	445	69364	3693827	71.11	10947	67.7	3.51	5
SGB1503	RS-B082_bin9.metabat2	Bacteria	Actinobacteriota	Actinomycetia	Actinomycetales	Dermatophilaceae	Pedococcus	Unassign	471	39137	3486740	71.17	9100	86.06	2.3	0
SGB1504	RS-B082_bins46.concoct	Bacteria	Actinobacteriota	Actinomycetia	Mycobacteriales	Pseudonocardiaceae	Amycolatopsis	Unassign	941	74651	9658808	68.24	13665	90.29	2.55	350
SGB1505	RS-B082_bins48.concoct	Bacteria	Proteobacteria	Gammaproteobacteria	Pseudomonadales	Moraxellaceae	Acinetobacter	Acinetobacter junii	186	89515	2539702	38.7	17989	61.55	3.45	1
SGB1506	RS-B083_bin16.metabat2	Bacteria	Actinobacteriota	Thermoleophilia	Solirubrobacterales	Solirubrobacteraceae	Unassign	Unassign	290	27542	1988702	69.68	7896	76.81	1	0
SGB1507	RS-B083_bin23.metabat2	Bacteria	Acidobacteriota	Thermoanaerobaculia	UBA5704	UBA5704	UBA5704	Unassign	883	22281	4510418	66.78	5524	50.61	0.48	7
SGB1508	RS-B083_bins4.concoct	Bacteria	Actinobacteriota	Actinomycetia	Mycobacteriales	Mycobacteriaceae	Mycobacterium	Unassign	942	20592	5154174	64.41	5985	51.82	4.89	8
SGB1509	RS-B084_bin27.metabat2	Bacteria	Verrucomicrobiota	Verrucomicrobiae	Chthoniobacterales	Xiphinematobacteraceae	Xiphinematobacter	Unassign	2	954259	969330	42.74	954259	92.57	0.68	0
SGB1510	RS-B084_bins47.concoct	Bacteria	Proteobacteria	Gammaproteobacteria	Burkholderiales	Burkholderiaceae	Acidovorax	Unassign	687	33801	2594350	65.67	3981	60.46	0.4	0
SGB1511	RS-B085_bins26.concoct	Bacteria	Acidobacteriota	Acidobacteriae	Acidoferrales	UBA7541	Acidoferrum	Unassign	984	54422	3910452	57.02	4183	55.19	2.24	0
SGB1512	RS-B086.bins030.maxbin	Bacteria	Actinobacteriota	Actinomycetia	Streptosporangiales	Streptosporangiaceae	UBA9676	Unassign	990	10329	3116045	72.4	3118	55.3	4.43	0
SGB1513	RS-B086_bin16.metabat2	Bacteria	Proteobacteria	Alphaproteobacteria	Rhizobiales	Methyloligellaceae	Methyloceanibacter	Unassign	273	20850	1393028	65.51	5500	59.42	0.74	0
SGB1514	RS-B086_bin20.metabat2	Bacteria	Acidobacteriota	Acidobacteriae	Acidoferrales	UBA7541	Acidoferrum	Unassign	39	549485	5230402	57.08	277547	93.59	4.27	0
SGB1515	RS-B086_bin28.metabat2	Bacteria	Proteobacteria	Alphaproteobacteria	Caulobacterales	Caulobacteraceae	Brevundimonas	Brevundimonas sp006547065	144	125351	3344590	67.54	38455	98.68	0.7	3
SGB1516	RS-B086_bin34.metabat2	Bacteria	Bacteroidota	Bacteroidia	Chitinophagales	Chitinophagaceae	VBAS01	Unassign	827	43751	5191174	38.6	7340	84.21	2.33	0
SGB1517	RS-B086_bin6.metabat2	Bacteria	Proteobacteria	Alphaproteobacteria	Rhizobiales	Hyphomicrobiaceae	AWTP1-13	Unassign	623	48791	6040944	64.26	12763	92.94	3.96	0
SGB1518	RS-B086_bins0.concoct	Bacteria	Proteobacteria	Alphaproteobacteria	Rhizobiales	Beijerinckiaceae	Methylobacterium	Unassign	297	130026	5238144	71.52	24249	94.38	2.82	1
SGB1519	RS-B086_bins30.concoct	Bacteria	Dependentiae	Babeliae	Babeliales	Vermiphilaceae	SOIL31	Unassign	557	97194	2291152	39.91	4070	75.36	9.09	0
SGB1520	RS-B086_bins67.concoct	Bacteria	Chloroflexota	Limnocylindria	Limnocylindrales	CSP1-4	UBA5189	Unassign	82	149974	2423052	71.29	43304	85.87	1.83	0
SGB1521	RS-B087_bin10.metabat2	Bacteria	Actinobacteriota	Thermoleophilia	Gaiellales	Gaiellaceae	Unassign	Unassign	274	56001	2320029	69.08	10738	87.5	7.04	1
SGB1522	RS-B087_bin11.metabat2	Bacteria	Proteobacteria	Alphaproteobacteria	Rhizobiales	Xanthobacteraceae	PALSA-894	Unassign	213	215886	6073053	64.57	41375	96.49	3.24	1
SGB1523	RS-B087_bin20.metabat2	Bacteria	Acidobacteriota	Blastocatellia	Pyrinomonadales	Pyrinomonadaceae	PSRF01	Unassign	713	92202	7405058	54.49	13459	90.9	2.19	56
SGB1524	RS-B087_bin32.metabat2	Bacteria	Proteobacteria	Gammaproteobacteria	Enterobacterales	Enterobacteriaceae	Kosakonia	Unassign	208	110813	2937553	54.73	19559	69.85	0.99	0
SGB1525	RS-B087_bin34.metabat2	Bacteria	Chloroflexota	Limnocylindria	Limnocylindrales	CSP1-4	SPCO01	Unassign	651	12516	2382567	68.63	3583	51.46	3.45	0
SGB1526	RS-B087_bin35.metabat2	Bacteria	Verrucomicrobiota	Verrucomicrobiae	Pedosphaerales	SIBH01	SIBH01	Unassign	858	30608	5888853	58.1	8085	85.53	5.41	0
SGB1527	RS-B087_bin36.metabat2	Bacteria	Actinobacteriota	Thermoleophilia	Solirubrobacterales	1970-09-01	Unassign	Unassign	279	46435	2365348	68.84	10477	80.45	2.76	0
SGB1528	RS-B087_bin40.metabat2	Bacteria	Acidobacteriota	Thermoanaerobaculia	Gp7-AA8	Gp7-AA8	QHVT01	Unassign	486	142332	6931684	65.88	20768	96.5	7.74	1
SGB1529	RS-B087_bins15.concoct	Bacteria	Proteobacteria	Gammaproteobacteria	Burkholderiales	Burkholderiaceae	Variovorax	Unassign	877	28862	4769837	68.1	6381	83.05	5.91	2
SGB1530	RS-B088.bins016.maxbin	Bacteria	Proteobacteria	Alphaproteobacteria	Sphingomonadales	Sphingomonadaceae	Sphingobium	Unassign	261	227972	4097191	64.11	43479	95.43	3.45	26
SGB1531	RS-B088.bins027.maxbin	Bacteria	Acidobacteriota	Acidobacteriae	Bryobacterales	Bryobacteraceae	Unassign	Unassign	1568	42664	5027436	62.06	3123	51.72	1.72	0
SGB1532	RS-B088_bins41.concoct	Bacteria	Proteobacteria	Alphaproteobacteria	Rhizobiales	Rhizobiaceae	Agrobacterium	Agrobacterium deltaense	67	641447	5201413	59.91	143761	100	0.53	18
SGB1533	RS-B088_bins44.concoct	Bacteria	Proteobacteria	Alphaproteobacteria	Sphingomonadales	Sphingomonadaceae	Novosphingobium	Unassign	257	67109	2653408	67.6	14276	83.99	1.25	0
SGB1534	RS-B089_bin14.metabat2	Bacteria	Bdellovibrionota	Bacteriovoracia	Bacteriovoracales	Bacteriovoracaceae	UBA4096	Unassign	142	140036	3688149	41.56	40765	89.43	3.57	1
SGB1535	RS-B089_bin16.metabat2	Bacteria	Patescibacteria	Saccharimonadia	Saccharimonadales	UBA4665	Unassign	Unassign	127	55587	1039968	43.55	9842	51.29	0	0
SGB1536	RS-B089_bin22.metabat2	Bacteria	Actinobacteriota	Actinomycetia	Propionibacteriales	Nocardioidaceae	Nocardioides	Unassign	530	14202	2294532	69.56	4395	53.21	1.84	0
SGB1537	RS-B089_bin27.metabat2	Bacteria	Actinobacteriota	Actinomycetia	Propionibacteriales	Nocardioidaceae	JACCUS01	Unassign	698	22702	3732146	66.14	5780	71.13	5.33	0
SGB1538	RS-B089_bin29.metabat2	Bacteria	Proteobacteria	Alphaproteobacteria	Caulobacterales	TH1-2	Unassign	Unassign	438	14892	1895488	61.99	4396	60.13	0.49	0
SGB1539	RS-B089_bin31.metabat2	Bacteria	Proteobacteria	Alphaproteobacteria	Rhizobiales	Xanthobacteraceae	Pseudolabrys	Unassign	557	14778	2573786	59.77	4829	57.81	2.85	0
SGB1540	RS-B089_bin32.metabat2	Bacteria	Actinobacteriota	Thermoleophilia	Solirubrobacterales	1970-09-01	VAYN01	Unassign	369	29444	1833939	69.34	5275	54.58	2.3	0
SGB1541	RS-B089_bins18.concoct	Bacteria	Proteobacteria	Alphaproteobacteria	Rhizobiales	Rhizobiaceae	Rhizobium_A	Rhizobium_A rhizoryzae	668	126823	4458481	58.1	7965	81.2	1.94	4
SGB1542	RS-B089_bins43.concoct	Bacteria	Firmicutes	Bacilli	Exiguobacterales	Exiguobacteraceae	Exiguobacterium	Exiguobacterium chiriqhucha	435	16821	1472922	52.43	3425	61.64	0.46	0
SGB1543	RS-B089_bins44.concoct	Bacteria	Proteobacteria	Gammaproteobacteria	Xanthomonadales	Xanthomonadaceae	SCMT01	Unassign	232	70511	3951517	68.25	24894	93.49	1.69	66
SGB1544	RS-B089_bins51.concoct	Bacteria	Acidobacteriota	Thermoanaerobaculia	Gp7-AA8	Gp7-AA8	QHVT01	Unassign	1218	16194	4661844	66.54	3986	53.79	3.54	0
SGB1545	RS-B091.bins008.maxbin	Bacteria	Proteobacteria	Gammaproteobacteria	Pseudomonadales	Pseudomonadaceae	Pseudomonas_E	Pseudomonas_E monteilii	916	32493	3700483	63.06	4317	54.62	2.34	5
SGB1546	RS-B091.bins009.maxbin	Bacteria	Proteobacteria	Gammaproteobacteria	Pseudomonadales	Moraxellaceae	Acinetobacter	Acinetobacter kanungonis	201	103457	1988085	43	23536	54.09	2.96	0
SGB1547	RS-B091.bins074.maxbin	Bacteria	Proteobacteria	Gammaproteobacteria	Pseudomonadales	Moraxellaceae	Acinetobacter	Acinetobacter pittii	830	58379	3480655	38.83	4362	52.59	3.45	1
SGB1548	RS-B091_bin13.metabat2	Bacteria	Proteobacteria	Gammaproteobacteria	Burkholderiales	Burkholderiaceae	Mitsuaria	Mitsuaria sp900113225	884	17113	4064086	69.82	4758	73.7	7.99	0
SGB1549	RS-B091_bin37.metabat2	Bacteria	Acidobacteriota	Acidobacteriae	Acidoferrales	UBA7541	Unassign	Unassign	375	42118	3030042	57.22	10323	68.79	2.56	0
SGB1550	RS-B091_bin46.metabat2	Bacteria	Proteobacteria	Gammaproteobacteria	Steroidobacterales	Steroidobacteraceae	13-2-20CM-66-19	Unassign	1110	27114	6452206	63.09	6532	75.29	9.26	1
SGB1551	RS-B091_bin51.metabat2	Bacteria	Actinobacteriota	Acidimicrobiia	IMCC26256	PALSA-555	Unassign	Unassign	675	23817	3160192	69.93	4993	70.86	9.16	4
SGB1552	RS-B091_bin57.metabat2	Bacteria	Gemmatimonadota	Gemmatimonadetes	Gemmatimonadales	Gemmatimonadaceae	Unassign	Unassign	707	19254	3814900	64.61	6086	74.02	3.4	0
SGB1553	RS-B091_bins12.concoct	Bacteria	Proteobacteria	Alphaproteobacteria	Sphingomonadales	Sphingomonadaceae	Novosphingobium	Unassign	330	75653	4093609	68.04	15355	85.92	2.05	1
SGB1554	RS-B091_bins15.concoct	Bacteria	Proteobacteria	Alphaproteobacteria	Caulobacterales	Caulobacteraceae	Phenylobacterium	Unassign	183	99822	3070394	69.94	24379	88	1.15	1
SGB1555	RS-B091_bins32.concoct	Bacteria	Proteobacteria	Alphaproteobacteria	Sphingomonadales	Sphingomonadaceae	Sphingobium	Unassign	492	70540	4952102	64.06	13522	51.52	0	6
SGB1556	RS-B091_bins47.concoct	Bacteria	Myxococcota	Polyangia	Polyangiales	Polyangiaceae	Palsa-1150	Unassign	767	84700	7621953	68.62	11951	79	4.68	1
SGB1557	RS-B091_bins54.concoct	Bacteria	Actinobacteriota	Actinomycetia	Mycobacteriales	Pseudonocardiaceae	Actinophytocola	Unassign	1132	20725	5524436	70.25	5399	62.23	0.71	17
SGB1558	RS-B091_bins58.concoct	Bacteria	Proteobacteria	Gammaproteobacteria	Pseudomonadales	Pseudomonadaceae	Pseudomonas_E	Pseudomonas_E sp003033885	609	56736	5464330	60.61	11183	84.88	2.72	11
SGB1559	RS-B091_bins79.concoct	Bacteria	Proteobacteria	Gammaproteobacteria	Steroidobacterales	Steroidobacteraceae	FEN-1191	Unassign	156	79993	2415992	66.35	22166	84.54	3.29	2
SGB1560	RS-B092_bin12.metabat2	Bacteria	Proteobacteria	Gammaproteobacteria	Steroidobacterales	Steroidobacteraceae	CAILZL01	Unassign	104	160621	3876867	58.96	63179	97.37	2.78	75
SGB1561	RS-B092_bin16.metabat2	Bacteria	Actinobacteriota	Actinomycetia	Mycobacteriales	Mycobacteriaceae	Nocardia	Unassign	1152	30665	7043583	67.77	6827	71.88	3.58	28
SGB1562	RS-B092_bin21.metabat2	Bacteria	Bacteroidota	Bacteroidia	Chitinophagales	Chitinophagaceae	Puia	Unassign	665	39295	5843671	53.98	11265	88.81	1.72	0
SGB1563	RS-B092_bin24.metabat2	Bacteria	Proteobacteria	Gammaproteobacteria	Pseudomonadales	Pseudomonadaceae	Pseudomonas_E	Pseudomonas_E monteilii	832	29542	4391056	62.65	5699	52.79	1.75	1
SGB1564	RS-B092_bin5.metabat2	Bacteria	Proteobacteria	Gammaproteobacteria	Steroidobacterales	Steroidobacteraceae	CAILZL01	Unassign	56	539905	4144873	56.63	110447	97.1	1.99	3
SGB1565	RS-B092_bins64.concoct	Bacteria	Actinobacteriota	Actinomycetia	Streptosporangiales	Streptosporangiaceae	Trebonia	Unassign	449	88802	6693975	69.55	20841	92.47	5.57	250
SGB1566	RS-B093_bin13.metabat2	Bacteria	Proteobacteria	Alphaproteobacteria	Sphingomonadales	Sphingomonadaceae	Sphingobium	Sphingobium yanoikuyae	491	26659	2100581	65.43	4342	50	0	0
SGB1567	RS-B093_bin2.metabat2	Bacteria	Acidobacteriota	Acidobacteriae	Acidobacteriales	SbA1	Unassign	Unassign	438	173913	7161428	56.93	37126	94.6	2.28	1
SGB1568	RS-B093_bin30.metabat2	Bacteria	Proteobacteria	Gammaproteobacteria	Enterobacterales	Enterobacteriaceae	Klebsiella	Klebsiella electrica	122	135294	3238778	56.34	41595	63.76	0	4
SGB1569	RS-B093_bin4.metabat2	Bacteria	Chloroflexota	Limnocylindria	Limnocylindrales	CSP1-4	SPCO01	Unassign	496	26025	2769384	69.74	6219	66.71	2.75	0
SGB1570	RS-B093_bin6.metabat2	Bacteria	Patescibacteria	Saccharimonadia	Saccharimonadales	EFPC-124	Unassign	Unassign	23	165255	1061142	54.61	90599	64.51	0	0
SGB1571	RS-B093_bin9.metabat2	Bacteria	Acidobacteriota	Acidobacteriae	Bryobacterales	Bryobacteraceae	Unassign	Unassign	529	25130	3145819	61.98	6992	74.91	2.19	0
SGB1572	RS-B093_bins4.concoct	Bacteria	Bacteroidota	Bacteroidia	Sphingobacteriales	Sphingobacteriaceae	Mucilaginibacter	Unassign	1024	15927	3550039	42.81	3536	64.81	1.84	0
SGB1573	RS-B093_bins6.concoct	Bacteria	Proteobacteria	Gammaproteobacteria	Burkholderiales	Burkholderiaceae	Ralstonia	Unassign	222	182873	5285669	63.94	36242	95.91	0.34	5
SGB1574	RS-B093_bins66.concoct	Bacteria	Proteobacteria	Gammaproteobacteria	Xanthomonadales	Xanthomonadaceae	Stenotrophomonas	Unassign	777	13644	2675447	67.14	3468	57.46	3.93	0
SGB1575	RS-B093_bins7.concoct	Bacteria	Actinobacteriota	Thermoleophilia	Solirubrobacterales	1970-09-01	Unassign	Unassign	473	16145	1653740	68.66	3623	54.08	3.02	0
SGB1576	RS-B094.bins002.maxbin	Bacteria	Actinobacteriota	Actinomycetia	Streptosporangiales	Streptosporangiaceae	Trebonia	Unassign	1023	33919	4699275	70.1	5166	67.49	4.72	61
SGB1577	RS-B094.bins046.maxbin	Bacteria	Proteobacteria	Gammaproteobacteria	Pseudomonadales	Moraxellaceae	Acinetobacter	Acinetobacter junii	584	66747	4092538	37.23	11177	71.04	8.03	10
SGB1578	RS-B094.bins048.maxbin	Bacteria	Verrucomicrobiota	Verrucomicrobiae	Chthoniobacterales	UBA10450	Udaeobacter	Unassign	330	33657	1773821	54.77	6730	71.79	8.42	0
SGB1579	RS-B094.bins054.maxbin	Bacteria	Proteobacteria	Gammaproteobacteria	Pseudomonadales	Moraxellaceae	Acinetobacter	Unassign	284	79081	3414667	41.3	20825	82.14	6.29	1
SGB1580	RS-B094_bin10.metabat2	Bacteria	Proteobacteria	Alphaproteobacteria	Caulobacterales	Caulobacteraceae	BOG-935	Unassign	100	169772	3085859	67.25	51103	92.85	4.24	1
SGB1581	RS-B094_bin18.metabat2	Bacteria	Actinobacteriota	Actinomycetia	Mycobacteriales	Mycobacteriaceae	Mycobacterium	Unassign	543	59756	6315978	65.85	16433	94.52	7.53	87
SGB1582	RS-B094_bin23.metabat2	Bacteria	Proteobacteria	Alphaproteobacteria	Caulobacterales	Caulobacteraceae	Phenylobacterium	Unassign	299	50757	3030561	69.62	13718	90.65	7.52	3
SGB1583	RS-B094_bin36.metabat2	Bacteria	Actinobacteriota	Actinomycetia	Mycobacteriales	Jatrophihabitantaceae	JAFAWL01	Unassign	111	97336	2714897	67.68	35008	85.01	1.09	13
SGB1584	RS-B094_bin40.metabat2	Bacteria	Proteobacteria	Alphaproteobacteria	Micropepsales	Micropepsaceae	Unassign	Unassign	110	271060	3472283	66.51	48452	98.7	1.3	5
SGB1585	RS-B094_bin43.metabat2	Bacteria	Proteobacteria	Alphaproteobacteria	Rhizobiales	Xanthobacteraceae	P52-10	Unassign	246	96999	3612973	63.83	25128	93.42	2.88	1
SGB1586	RS-B094_bin5.metabat2	Bacteria	Actinobacteriota	Actinomycetia	Mycobacteriales	Mycobacteriaceae	Mycobacterium	Unassign	269	103941	6387313	66.6	36521	96.26	2.15	48
SGB1587	RS-B094_bin6.metabat2	Bacteria	Proteobacteria	Gammaproteobacteria	Steroidobacterales	Steroidobacteraceae	13-2-20CM-66-19	Unassign	993	44290	5749126	63.1	6431	55.17	0	0
SGB1588	RS-B094_bins11.concoct	Bacteria	Proteobacteria	Alphaproteobacteria	BOG-932	BOG-932	Unassign	Unassign	651	47909	4282773	65.61	7432	64.09	0.87	0
SGB1589	RS-B094_bins27.concoct	Bacteria	Actinobacteriota	Actinomycetia	Mycobacteriales	Mycobacteriaceae	Mycobacterium	Unassign	325	178408	7153018	63.41	35645	98.18	3.12	257
SGB1590	RS-B094_bins41.concoct	Bacteria	Actinobacteriota	Acidimicrobiia	IMCC26256	PALSA-555	Unassign	Unassign	227	49512	2617630	69.93	14382	91.64	3.42	0
SGB1591	RS-B094_bins51.concoct	Bacteria	Proteobacteria	Gammaproteobacteria	Steroidobacterales	Steroidobacteraceae	FEN-1191	Unassign	114	146606	2290764	69.13	32285	86.88	2.81	1
SGB1592	RS-B096_bin7.metabat2	Bacteria	Proteobacteria	Gammaproteobacteria	Burkholderiales	Burkholderiaceae	LMDS01	Unassign	928	27202	4305605	66.53	4775	53.32	1.54	0
SGB1593	RS-B096_bin8.metabat2	Bacteria	Proteobacteria	Alphaproteobacteria	Sphingomonadales	Sphingomonadaceae	Sphingopyxis	Unassign	299	99385	4240870	64.41	19257	97.14	3.49	10
SGB1594	RS-B096_bins10.concoct	Bacteria	Acidobacteriota	Blastocatellia	Pyrinomonadales	Pyrinomonadaceae	PSRF01	Unassign	1164	11730	3694714	51.05	3196	59.86	1.88	0
SGB1595	RS-B097.bins001.maxbin	Bacteria	Proteobacteria	Gammaproteobacteria	Pseudomonadales	Moraxellaceae	Acinetobacter	Acinetobacter kanungonis	56	314466	3737318	41.86	195708	99.73	2.4	7
SGB1596	RS-B097_bin12.metabat2	Bacteria	Proteobacteria	Gammaproteobacteria	Pseudomonadales	Pseudomonadaceae	Pseudomonas_E	Pseudomonas_E asiatica	692	58531	4650093	63.94	7949	60.53	0	7
SGB1597	RS-B097_bin2.metabat2	Bacteria	Patescibacteria	Saccharimonadia	Saccharimonadales	UBA1547	Unassign	Unassign	73	58956	954516	48.56	17669	60.77	0.95	0
SGB1598	RS-B097_bin27.metabat2	Bacteria	Chloroflexota	Ktedonobacteria	Ktedonobacterales	Ktedonobacteraceae	Unassign	Unassign	517	30661	3141469	47.39	6951	62.28	1.75	0
SGB1599	RS-B097_bins17.concoct	Bacteria	Firmicutes	Bacilli	Lactobacillales	Streptococcaceae	Lactococcus	Lactococcus lactis	313	8256	992609	35.57	3225	50.15	0.88	0
SGB1600	RS-B097_bins34.concoct	Bacteria	Acidobacteriota	Blastocatellia	Pyrinomonadales	Pyrinomonadaceae	UBA11740	Unassign	515	137436	6174000	56.02	16167	84.32	1.71	14
SGB1601	RS-B098.bins003.maxbin	Bacteria	Myxococcota_A	UBA9160	UBA9160	SMWR01	Unassign	Unassign	223	251081	5164094	71.12	39378	91.16	2.26	5
SGB1602	RS-B098.bins014.maxbin	Bacteria	Actinobacteriota	UBA4738	UBA4738	HRBIN12	AC-51	Unassign	475	16500	1753325	72.51	3792	64.39	2.99	0
SGB1603	RS-B098.bins022.maxbin	Bacteria	Actinobacteriota	Thermoleophilia	Miltoncostaeales	Unassign	Unassign	Unassign	515	14019	1680758	71.84	3296	52.59	2.59	0
SGB1604	RS-B098_bin1.metabat2	Bacteria	Chloroflexota	Limnocylindria	QHBO01	QHBO01	Unassign	Unassign	267	23856	1674362	70.08	7586	69.65	1.47	0
SGB1605	RS-B098_bin11.metabat2	Bacteria	Proteobacteria	Alphaproteobacteria	Rhizobiales	Xanthobacteraceae	Pseudolabrys	Unassign	507	36548	3047890	59.01	6958	50.48	1.45	1
SGB1606	RS-B098_bin2.metabat2	Bacteria	Acidobacteriota	Vicinamibacteria	Vicinamibacterales	UBA2999	Gp6-AA40	Unassign	604	45793	4518097	63.73	9116	91.03	5.56	1
SGB1607	RS-B098_bin4.metabat2	Bacteria	Chlamydiota	Chlamydiia	Chlamydiales	Waddliaceae	Waddlia	Unassign	291	23283	1886184	44.57	7374	79.49	1.35	0
SGB1608	RS-B098_bin6.metabat2	Bacteria	Proteobacteria	Gammaproteobacteria	Burkholderiales	SG8-39	JAGVSZ01	Unassign	779	23819	3568980	70.63	4675	61.76	0.9	0
SGB1609	RS-B099_bin13.metabat2	Bacteria	Actinobacteriota	Actinomycetia	Mycobacteriales	Mycobacteriaceae	Mycobacterium	Unassign	260	148978	7165806	66.79	39182	98.13	1.86	103
SGB1610	RS-B099_bin8.metabat2	Bacteria	Proteobacteria	Alphaproteobacteria	Rhizobiales	Methyloligellaceae	Methyloceanibacter	Unassign	222	58567	2162632	62.6	14327	73.96	8.56	0
SGB1611	RS-B100_bin15.metabat2	Bacteria	Acidobacteriota	Blastocatellia	Pyrinomonadales	Pyrinomonadaceae	PSRF01	Unassign	486	102014	7070075	54.08	21374	70.66	1.72	70
SGB1612	RS-B100_bin36.metabat2	Bacteria	Acidobacteriota	Acidobacteriae	Acidoferrales	UBA7541	Acidoferrum	Unassign	1532	16539	6404520	57.58	4199	58.09	4.31	0
SGB1613	RS-B100_bins41.concoct	Bacteria	Acidobacteriota	Blastocatellia	Pyrinomonadales	Pyrinomonadaceae	Unassign	Unassign	668	12018	2315462	48.3	3550	61.06	0.85	0
SGB1614	RS-B101.bins006.maxbin	Bacteria	Proteobacteria	Gammaproteobacteria	Nevskiales	Nevskiaceae	Hydrocarboniphaga	Unassign	162	185742	4798025	65.6	70952	99.28	4.93	0
SGB1615	RS-B101.bins013.maxbin	Bacteria	Proteobacteria	Gammaproteobacteria	Pseudomonadales	Pseudomonadaceae	Pseudomonas_E	Pseudomonas_E alcaligenes	153	147436	3552490	66.54	58325	51.03	3.45	7
SGB1616	RS-B101_bin19.metabat2	Bacteria	Bacteroidota	Bacteroidia	Flavobacteriales	Flavobacteriaceae	Flavobacterium	Unassign	18	286584	1416055	38.56	103340	50.18	0	1
SGB1617	RS-B101_bin2.metabat2	Bacteria	Methylomirabilota	Methylomirabilia	Rokubacteriales	CSP1-6	AR37	Unassign	885	16852	4016859	67.94	4703	62.5	1.83	0
SGB1618	RS-B101_bin22.metabat2	Bacteria	Proteobacteria	Gammaproteobacteria	Pseudomonadales	Pseudomonadaceae	Pseudomonas_E	Pseudomonas_E sp002112885	609	31832	3397911	61.15	6170	51.85	0	2
SGB1619	RS-B101_bin30.metabat2	Bacteria	Proteobacteria	Gammaproteobacteria	Enterobacterales	Alteromonadaceae	Pararheinheimera	Unassign	69	238485	4612557	52.26	117906	97.03	0.17	5
SGB1620	RS-B102.bins027.maxbin	Bacteria	Myxococcota	Polyangia	Polyangiales	Polyangiaceae	Unassign	Unassign	1456	12783	5035005	65.83	3523	53.25	3.55	0
SGB1621	RS-B102_bin12.metabat2	Bacteria	Proteobacteria	Gammaproteobacteria	Pseudomonadales	Pseudomonadaceae	Pseudomonas_E	Pseudomonas_E asiatica	723	36618	4914364	63.76	8022	73.68	1.75	1
SGB1622	RS-B102_bin22.metabat2	Bacteria	Verrucomicrobiota	Verrucomicrobiae	Chthoniobacterales	UBA10450	AV40	Unassign	332	14761	1332457	55.31	3887	54.98	4.13	0
SGB1623	RS-B102_bin25.metabat2	Bacteria	Proteobacteria	Gammaproteobacteria	Steroidobacterales	Steroidobacteraceae	FEN-1191	Unassign	367	11219	1609724	65.7	4708	51.83	2.41	0
SGB1624	RS-B102_bins42.concoct	Bacteria	Actinobacteriota	Acidimicrobiia	IMCC26256	PALSA-555	Unassign	Unassign	584	8923	1861234	69.77	3233	58.27	3.75	0
SGB1625	RS-B102_bins8.concoct	Bacteria	Actinobacteriota	Actinomycetia	Actinomycetales	Microbacteriaceae	Curtobacterium	Curtobacterium pusillum_A	312	40863	3112935	70.9	11343	52.95	0	16
SGB1626	RS-B104_bin11.metabat2	Bacteria	Proteobacteria	Gammaproteobacteria	Enterobacterales	Alteromonadaceae	Pararheinheimera	Unassign	178	162058	4353979	46.55	38959	97.65	0.11	0
SGB1627	RS-B104_bin27.metabat2	Bacteria	Proteobacteria	Alphaproteobacteria	Sphingomonadales	Sphingomonadaceae	Sphingobium	Unassign	508	44506	3122768	62.15	7120	63.09	1.72	0
SGB1628	RS-B104_bin28.metabat2	Bacteria	Proteobacteria	Gammaproteobacteria	Pseudomonadales	Pseudomonadaceae	Pseudomonas_F	Unassign	653	50456	5500825	66.41	10807	60.69	1.72	13
SGB1629	RS-B104_bin32.metabat2	Bacteria	Proteobacteria	Gammaproteobacteria	Burkholderiales	Burkholderiaceae	Acidovorax	Acidovorax temperans	441	53376	3420722	63.95	9078	57.21	1.72	0
SGB1630	RS-B104_bin64.metabat2	Bacteria	Proteobacteria	Gammaproteobacteria	Burkholderiales	Burkholderiaceae	Aquabacterium	Unassign	106	134928	2963822	62.83	38160	76.2	3.74	0
SGB1631	RS-B104_bins15.concoct	Bacteria	Proteobacteria	Gammaproteobacteria	Burkholderiales	Casimicrobiaceae	PALSA-1003	Unassign	524	22402	2839542	64.21	6346	67.84	2.54	0
SGB1632	RS-B104_bins51.concoct	Bacteria	Proteobacteria	Gammaproteobacteria	Pseudomonadales	Moraxellaceae	Acinetobacter	Acinetobacter fasciculus	181	80719	2704140	43.59	19692	71.82	4.31	6
SGB1633	RS-B105.bins028.maxbin	Bacteria	Proteobacteria	Alphaproteobacteria	Rhizobiales	Xanthobacteraceae	Palsa-892	Unassign	297	37299	2005204	61.64	8641	71.54	3.38	0
SGB1634	RS-B105_bin1.metabat2	Bacteria	Bacteroidota	Bacteroidia	Flavobacteriales	Weeksellaceae	Chryseobacterium	Unassign	547	20191	2675530	34.92	5198	64.78	0.49	2
SGB1635	RS-B105_bin35.metabat2	Bacteria	Gemmatimonadota	Gemmatimonadetes	Gemmatimonadales	GWC2-71-9	AG41	Unassign	554	36336	3204706	68.41	6553	79.3	1.1	0
SGB1636	RS-B105_bins18.concoct	Bacteria	Actinobacteriota	Actinomycetia	Actinomycetales	Micrococcaceae	Arthrobacter_K	Unassign	983	65913	3656906	63.68	3687	58.55	1.53	7
SGB1637	RS-B105_bins24.concoct	Bacteria	Dormibacterota	Dormibacteria	Dormibacterales	Dormibacteraceae	40CM-4-65-16	Unassign	494	20356	2331416	67.23	5305	56.9	1.72	0
SGB1638	RS-B105_bins51.concoct	Bacteria	Proteobacteria	Alphaproteobacteria	Rhizobiales	Rhizobiaceae	Rhizobium	Rhizobium miluonense	961	40078	5530190	59.54	6669	77.29	2.67	3
SGB1639	RS-B106_bin10.metabat2	Bacteria	Actinobacteriota	Actinomycetia	Mycobacteriales	Jatrophihabitantaceae	JAFAWL01	Unassign	426	36386	2952639	66.45	8334	76.44	3.45	0
SGB1640	RS-B106_bin17.metabat2	Bacteria	Bacteroidota	Bacteroidia	Flavobacteriales	Flavobacteriaceae	Flavobacterium	Unassign	72	275157	3664171	39.47	81068	96.47	0.72	4
SGB1641	RS-B106_bin20.metabat2	Bacteria	Proteobacteria	Gammaproteobacteria	Steroidobacterales	Steroidobacteraceae	FEN-1191	Unassign	281	28203	2008477	66.4	8909	68.59	2.39	0
SGB1642	RS-B106_bin22.metabat2	Bacteria	Proteobacteria	Gammaproteobacteria	Steroidobacterales	Steroidobacteraceae	13-2-20CM-66-19	Unassign	632	86025	6968570	60.8	15633	81.94	8.5	4
SGB1643	RS-B106_bin23.metabat2	Bacteria	Bacteroidota	Bacteroidia	Chitinophagales	Chitinophagaceae	Chitinophaga	Unassign	627	95393	6687053	47.03	14065	86.93	1.89	7
SGB1644	RS-B106_bin27.metabat2	Bacteria	Verrucomicrobiota	Verrucomicrobiae	Verrucomicrobiales	Akkermansiaceae	Luteolibacter	Unassign	804	30007	4626280	63.77	6489	74.39	4.76	0
SGB1645	RS-B106_bin30.metabat2	Bacteria	Proteobacteria	Alphaproteobacteria	Rhizobiales	Rhizobiaceae	Agrobacterium	Unassign	500	56672	3717783	57.66	9549	60.66	0.34	0
SGB1646	RS-B106_bin32.metabat2	Bacteria	Bacteroidota	Bacteroidia	Flavobacteriales	Weeksellaceae	Chryseobacterium	Unassign	61	142282	2368066	33.6	57029	64.71	0	4
SGB1647	RS-B106_bin45.metabat2	Bacteria	Actinobacteriota	Actinomycetia	Streptosporangiales	Streptosporangiaceae	Trebonia	Unassign	380	89098	5762741	69.33	23816	94.81	6.48	357
SGB1648	RS-B106_bin57.metabat2	Bacteria	Actinobacteriota	Thermoleophilia	Solirubrobacterales	Solirubrobacteraceae	Palsa-744	Unassign	150	104041	2916705	69.57	31307	85.84	3.42	1
SGB1649	RS-B106_bin61.metabat2	Bacteria	Actinobacteriota	Thermoleophilia	Solirubrobacterales	Solirubrobacteraceae	Palsa-465	Unassign	241	60689	2353914	68.44	12989	86.98	5.7	0
SGB1650	RS-B106_bin71.metabat2	Bacteria	Actinobacteriota	Thermoleophilia	Gaiellales	Gaiellaceae	Palsa-739	Unassign	426	38027	2421180	68.18	6628	56.38	0	0
SGB1651	RS-B106_bin76.metabat2	Bacteria	Bacteroidota	Bacteroidia	Chitinophagales	Chitinophagaceae	Unassign	Unassign	72	266459	5768431	45.48	144776	100	0.99	25
SGB1652	RS-B106_bins16.concoct	Bacteria	Eremiobacterota	Eremiobacteria	Baltobacterales	Baltobacteraceae	Tumulicola	Unassign	442	31086	1760293	65.72	4167	59.54	1.85	0
SGB1653	RS-B106_bins36.concoct	Bacteria	Proteobacteria	Alphaproteobacteria	Rhizobiales	Beijerinckiaceae	Bosea	Unassign	317	224081	7559083	65.84	34170	78.21	4.31	6
SGB1654	RS-B106_bins45.concoct	Bacteria	Proteobacteria	Gammaproteobacteria	Steroidobacterales	Steroidobacteraceae	CAILZL01	Unassign	838	14876	2873108	54.86	3546	55.91	2.54	0
SGB1655	RS-B106_bins49.concoct	Bacteria	Acidobacteriota	Acidobacteriae	Acidobacteriales	Gp1-AA117	Gp1-AA17	Unassign	635	36912	4613192	55.61	8466	81.4	4.27	0
SGB1656	RS-B106_bins63.concoct	Bacteria	Proteobacteria	Alphaproteobacteria	Rhizobiales	Beijerinckiaceae	Roseiarcus	Unassign	318	89121	4847590	66.29	22021	92.16	2.22	9
SGB1657	RS-B106_bins66.concoct	Bacteria	Actinobacteriota	Actinomycetia	Nanopelagicales	Unassign	Unassign	Unassign	165	99976	2555830	67.94	18901	80.42	1.35	6
SGB1658	RS-B106_bins70.concoct	Bacteria	Proteobacteria	Alphaproteobacteria	Rhizobiales	Methyloligellaceae	Methyloceanibacter	Unassign	282	26027	1494951	62.3	6094	71.74	2.16	0
SGB1659	RS-B106_bins77.concoct	Bacteria	Actinobacteriota	Actinomycetia	Mycobacteriales	Mycobacteriaceae	Nocardia	Unassign	1213	25273	5982613	66.04	5564	68.46	2.43	9
SGB1660	RS-B106_bins95.concoct	Bacteria	Proteobacteria	Alphaproteobacteria	Sphingomonadales	Sphingomonadaceae	Sphingomonas	Unassign	159	279819	4699373	65.95	46202	96.01	4.14	7
SGB1661	RS-B106_bins97.concoct	Bacteria	Proteobacteria	Alphaproteobacteria	Sphingomonadales	Sphingomonadaceae	Novosphingobium	Unassign	425	77109	4374150	66.82	14086	73.53	3.61	0
SGB1662	RS-B107_bin11.metabat2	Bacteria	Acidobacteriota	Acidobacteriae	Acidoferrales	UBA7541	Acidoferrum	Unassign	630	23126	3670939	57.74	6707	72.96	3.85	1
SGB1663	RS-B107_bin23.metabat2	Bacteria	Methylomirabilota	Methylomirabilia	Rokubacteriales	CSP1-6	AR37	Unassign	837	19723	3633108	68.2	4502	51.9	4.7	0
SGB1664	RS-B110.bins040.maxbin	Bacteria	Actinobacteriota	Actinomycetia	Mycobacteriales	Mycobacteriaceae	Mycobacterium	Unassign	1394	16408	4845076	65.17	3647	54.73	4.71	0
SGB1665	RS-B110_bin41.metabat2	Bacteria	Verrucomicrobiota	Verrucomicrobiae	Chthoniobacterales	UBA10450	AV40	Unassign	192	14257	848624	55.22	4542	54.09	2.05	0
SGB1666	RS-B110_bins38.concoct	Bacteria	Eremiobacterota	Eremiobacteria	Eremiobacterales	Eremiobacteraceae	Unassign	Unassign	349	50932	2879071	63.98	10769	90.28	0.93	0
SGB1667	RS-B110_bins58.concoct	Bacteria	Methylomirabilota	Methylomirabilia	Rokubacteriales	CSP1-6	Unassign	Unassign	583	33751	4734002	71.08	9972	79.41	6.75	8
SGB1668	RS-B110_bins6.concoct	Bacteria	Actinobacteriota	Acidimicrobiia	IMCC26256	Unassign	Unassign	Unassign	457	31437	2614831	69.82	6434	78.56	3.85	0
SGB1669	RS-B111_bin31.metabat2	Bacteria	Proteobacteria	Gammaproteobacteria	Burkholderiales	Burkholderiaceae	Aquabacterium	Unassign	52	326608	4048775	66.23	123757	97.98	1.4	0
SGB1670	RS-B111_bin33.metabat2	Bacteria	Dormibacterota	Dormibacteria	UBA8260	UBA8260	Unassign	Unassign	162	82311	2226299	59.63	18187	91.2	0	0
SGB1671	RS-B111_bin37.metabat2	Bacteria	Verrucomicrobiota	Verrucomicrobiae	Chthoniobacterales	UBA10450	AV40	Unassign	281	15953	1412113	55.29	5319	66.77	0.81	0
SGB1672	RS-B111_bin40.metabat2	Bacteria	Chloroflexota	Ktedonobacteria	Ktedonobacterales	Ktedonobacteraceae	Unassign	Unassign	408	54020	4199782	47.76	12670	88.84	3.96	5
SGB1673	RS-B111_bins11.concoct	Bacteria	Proteobacteria	Gammaproteobacteria	Xanthomonadales	Rhodanobacteraceae	Dyella_B	Unassign	258	140199	5133302	60.35	29130	78.79	0	34
SGB1674	RS-B111_bins36.concoct	Bacteria	Proteobacteria	Gammaproteobacteria	Burkholderiales	Burkholderiaceae	Mitsuaria	Unassign	1121	28280	4438025	69.12	4197	51.21	3.45	0
SGB1675	RS-B111_bins37.concoct	Bacteria	Proteobacteria	Gammaproteobacteria	Burkholderiales	Burkholderiaceae	Ralstonia	Unassign	689	66347	5667022	63.76	10577	86.13	3.21	1
SGB1676	RS-B111_bins5.concoct	Bacteria	Dormibacterota	Dormibacteria	Dormibacterales	Dormibacteraceae	CF-161	Unassign	612	17749	3136543	72.1	5788	64.72	1.23	10
SGB1677	RS-B111_bins62.concoct	Bacteria	Proteobacteria	Gammaproteobacteria	Pseudomonadales	Pseudomonadaceae	Pseudomonas_E	Unassign	300	117234	6529454	59.49	30549	98.17	3.81	15
SGB1678	RS-B112.bins002.maxbin	Bacteria	Actinobacteriota	Actinomycetia	Mycobacteriales	Mycobacteriaceae	Mycobacterium	Unassign	144	316618	6732121	64.87	115261	100	1.06	39
SGB1679	RS-B112_bin1.metabat2	Bacteria	Actinobacteriota	Actinomycetia	Mycobacteriales	Frankiaceae	Frankia	Unassign	914	30862	4776246	72.8	5663	76.9	0.59	26
SGB1680	RS-B112_bin15.metabat2	Bacteria	Proteobacteria	Gammaproteobacteria	Steroidobacterales	Steroidobacteraceae	FEN-1191	Unassign	100	154293	3325843	64.54	62108	94.76	1.93	0
SGB1681	RS-B112_bin23.metabat2	Bacteria	Proteobacteria	Gammaproteobacteria	Steroidobacterales	Steroidobacteraceae	FEN-1191	Unassign	518	29352	2479787	63.91	4849	50.31	0	0
SGB1682	RS-B112_bins31.concoct	Bacteria	Proteobacteria	Alphaproteobacteria	Rhizobiales	Xanthobacteraceae	JAFAXD01	Unassign	251	329465	4349914	61.9	25048	84.88	5.96	11
SGB1683	RS-B112_bins33.concoct	Bacteria	Actinobacteriota	Actinomycetia	Mycobacteriales	Mycobacteriaceae	Mycobacterium	Unassign	441	49623	5378955	65.7	15594	73.52	1.72	55
SGB1684	RS-B112_bins5.concoct	Bacteria	Acidobacteriota	Vicinamibacteria	Vicinamibacterales	UBA2999	WHSN01	Unassign	385	83165	4602857	65.76	17512	87.11	6.15	0
SGB1685	RS-B112_bins6.concoct	Bacteria	Proteobacteria	Alphaproteobacteria	Unassign	Unassign	Unassign	Unassign	198	84087	3453837	64.03	25170	91.41	0.43	1
SGB1686	RS-B113.bins012.maxbin	Bacteria	Proteobacteria	Gammaproteobacteria	Steroidobacterales	Steroidobacteraceae	CAILZL01	Unassign	225	91500	3484713	60.7	28519	90.67	2.48	3
SGB1687	RS-B113_bin8.metabat2	Bacteria	Proteobacteria	Gammaproteobacteria	Burkholderiales	Burkholderiaceae	Ralstonia	Unassign	261	149732	5623778	63.62	33463	98.8	0.96	5
SGB1688	RS-B113_bins33.concoct	Bacteria	Proteobacteria	Alphaproteobacteria	Sphingomonadales	Sphingomonadaceae	Sphingobium	Unassign	272	80371	3957068	63.48	20743	97.23	1.22	10
SGB1689	RS-B113_bins49.concoct	Bacteria	Proteobacteria	Gammaproteobacteria	Xanthomonadales	Rhodanobacteraceae	Rudaea	Unassign	889	15645	3081383	64.78	3458	57.92	4.45	0
SGB1690	RS-B114.bins009.maxbin	Bacteria	Verrucomicrobiota	Verrucomicrobiae	Chthoniobacterales	UBA10450	Udaeobacter	Unassign	503	22998	2103370	54.64	4532	79.87	7.77	0
SGB1691	RS-B114.bins062.maxbin	Bacteria	Proteobacteria	Alphaproteobacteria	Rhizobiales	Hyphomicrobiaceae	AWTP1-13	Unassign	397	23797	2390000	64.94	7447	51.44	3.42	0
SGB1692	RS-B114.bins099.maxbin	Bacteria	Proteobacteria	Gammaproteobacteria	Steroidobacterales	Steroidobacteraceae	CAILZL01	Unassign	676	9073	2126074	60.11	3169	56.5	4.43	0
SGB1693	RS-B114.bins145.maxbin	Bacteria	Bacteroidota	Bacteroidia	Chitinophagales	Chitinophagaceae	Puia	Unassign	1091	20984	3798639	54.58	3536	62.04	1.44	0
SGB1694	RS-B114_bin2.metabat2	Bacteria	Acidobacteriota	Acidobacteriae	Acidobacteriales	Acidobacteriaceae	Edaphobacter	Unassign	509	26582	3041109	55.48	6433	53.45	2.59	0
SGB1695	RS-B114_bin21.metabat2	Bacteria	Proteobacteria	Gammaproteobacteria	Burkholderiales	Burkholderiaceae	Ralstonia	Unassign	441	53482	5337190	63.83	17070	93.27	1.92	1
SGB1696	RS-B114_bin33.metabat2	Bacteria	Proteobacteria	Alphaproteobacteria	Caulobacterales	Caulobacteraceae	Phenylobacterium	Unassign	280	81735	3508820	68.66	17000	93.43	4.84	0
SGB1697	RS-B114_bin40.metabat2	Bacteria	Verrucomicrobiota	Verrucomicrobiae	Chthoniobacterales	Terrimicrobiaceae	Unassign	Unassign	500	24566	2588572	59.46	5611	80.93	9.11	0
SGB1698	RS-B114_bin57.metabat2	Bacteria	Proteobacteria	Gammaproteobacteria	Steroidobacterales	Steroidobacteraceae	13-2-20CM-66-19	Unassign	472	31689	3217447	66.32	8121	67.41	2.41	2
SGB1699	RS-B114_bin6.metabat2	Bacteria	Proteobacteria	Alphaproteobacteria	Rhizobiales	Hyphomicrobiaceae	Hyphomicrobium	Unassign	358	42140	2267974	60.25	7176	73.35	2.86	0
SGB1700	RS-B114_bin60.metabat2	Bacteria	Proteobacteria	Alphaproteobacteria	Caulobacterales	Caulobacteraceae	Palsa-881	Unassign	130	127552	3197629	67.56	39076	94.41	1.45	11
SGB1701	RS-B114_bin63.metabat2	Bacteria	Proteobacteria	Alphaproteobacteria	Caulobacterales	Caulobacteraceae	Phenylobacterium	Unassign	97	212301	3596866	68.8	66179	98.06	6.6	0
SGB1702	RS-B114_bin74.metabat2	Bacteria	Proteobacteria	Gammaproteobacteria	Burkholderiales	Burkholderiaceae	Pelomonas	Unassign	724	33956	4182152	69.12	6373	52.76	3.45	0
SGB1703	RS-B114_bin8.metabat2	Bacteria	Proteobacteria	Alphaproteobacteria	Rhizobiales	Rhizobiaceae	Rhizobium	Rhizobium sp009498525	234	268058	5982042	60.49	43143	68.97	0	3
SGB1704	RS-B114_bins117.concoct	Bacteria	Proteobacteria	Gammaproteobacteria	Xanthomonadales	Rhodanobacteraceae	Rudaea	Unassign	410	41879	3551404	63.37	10703	85.34	2.08	0
SGB1705	RS-B114_bins120.concoct	Bacteria	Proteobacteria	Alphaproteobacteria	Rhizobiales	Rhizobiaceae	Mesorhizobium	Unassign	146	318614	6969066	63.99	84198	93.46	6.16	2
SGB1706	RS-B114_bins16.concoct	Bacteria	Desulfobacterota_B	Binatia	Binatales	Binataceae	Unassign	Unassign	459	27163	2494067	64.56	6092	71.24	2.1	0
SGB1707	RS-B114_bins68.concoct	Bacteria	Proteobacteria	Gammaproteobacteria	Burkholderiales	Burkholderiaceae	Paraburkholderia	Paraburkholderia hospita	1235	21281	3864096	63.23	3120	55.29	1.96	0
SGB1708	RS-B114_bins96.concoct	Bacteria	Proteobacteria	Gammaproteobacteria	Steroidobacterales	Steroidobacteraceae	RPQJ01	Unassign	523	15763	2368105	66.84	4834	56.98	1.99	0
SGB1709	RS-B117.bins008.maxbin	Bacteria	Patescibacteria	Saccharimonadia	Saccharimonadales	EFPC-124	Unassign	Unassign	29	139095	1168565	55.57	93293	64.04	1.85	0
SGB1710	RS-B117_bin17.metabat2	Bacteria	Proteobacteria	Gammaproteobacteria	Steroidobacterales	Steroidobacteraceae	13-2-20CM-66-19	Unassign	824	68319	4713727	61.93	6120	63.44	3.61	2
SGB1711	RS-B117_bin18.metabat2	Bacteria	Patescibacteria	Saccharimonadia	Saccharimonadales	UBA4665	PMNU01	Unassign	122	25826	945718	57.52	9776	54.7	0.85	0
SGB1712	RS-B117_bin26.metabat2	Bacteria	Proteobacteria	Gammaproteobacteria	Steroidobacterales	Steroidobacteraceae	CAILZL01	Unassign	434	58135	3379638	59.94	9575	86.35	3.34	3
SGB1713	RS-B117_bin35.metabat2	Bacteria	Proteobacteria	Alphaproteobacteria	Sphingomonadales	Sphingomonadaceae	Sphingobium	Unassign	555	23200	2598372	62.75	4851	58.37	2.28	0
SGB1714	RS-B117_bins32.concoct	Bacteria	Actinobacteriota	Actinomycetia	Mycobacteriales	Mycobacteriaceae	Nocardia	Unassign	450	56017	5304075	65.27	15270	90.67	0.36	27
SGB1715	RS-B117_bins56.concoct	Bacteria	Proteobacteria	Alphaproteobacteria	Sphingomonadales	Sphingomonadaceae	Sphingomicrobium	Unassign	79	110649	2703723	64.76	65467	95.66	3.57	0
SGB1716	RS-B118.bins018.maxbin	Bacteria	Verrucomicrobiota	Verrucomicrobiae	Chthoniobacterales	UBA10450	AV40	Unassign	370	25777	2148831	55.87	7633	86.08	7.3	0
SGB1717	RS-B118_bin24.metabat2	Bacteria	Proteobacteria	Alphaproteobacteria	Micropepsales	Micropepsaceae	Unassign	Unassign	83	136401	3127751	64.52	78205	97.83	0.43	3
SGB1718	RS-B119_bin16.metabat2	Bacteria	Nitrospirota	Nitrospiria	Nitrospirales	Nitrospiraceae	Palsa-1315	Unassign	257	12621	1076763	56.47	4239	53.29	0.11	0
SGB1719	RS-B119_bin18.metabat2	Bacteria	Verrucomicrobiota	Verrucomicrobiae	Chthoniobacterales	UBA10450	AV40	Unassign	307	18508	1530628	55.86	5264	70.82	2.97	0
SGB1720	RS-B119_bin8.metabat2	Bacteria	Chloroflexota	UBA6077	UBA6077	SHYK01	Unassign	Unassign	66	121535	2293162	61.32	62003	97.69	0.99	0
SGB1721	RS-B120_bin16.metabat2	Bacteria	Acidobacteriota	Blastocatellia	UBA7656	UBA7656	JACQDB01	Unassign	1317	31634	7366762	46.48	6066	72.52	5.13	0
SGB1722	RS-B120_bin21.metabat2	Bacteria	Proteobacteria	Alphaproteobacteria	Sphingomonadales	Sphingomonadaceae	Sphingobium	Unassign	280	59455	2544817	63.85	11979	87.77	0.81	10
SGB1723	RS-B120_bins41.concoct	Bacteria	Proteobacteria	Gammaproteobacteria	Steroidobacterales	Steroidobacteraceae	PALSA-1196	Unassign	719	26402	4368718	62.91	7524	84.28	5.53	1
SGB1724	RS-B121_bin12.metabat2	Bacteria	Proteobacteria	Alphaproteobacteria	Sphingomonadales	Sphingomonadaceae	Novosphingobium	Unassign	246	73181	2957389	66.38	17184	88.56	3.22	2
SGB1725	RS-B121_bin22.metabat2	Bacteria	Actinobacteriota	Actinomycetia	Streptomycetales	Catenulisporaceae	Actinospica	Unassign	1087	15135	4807830	69.77	4556	70.92	3.23	22
SGB1726	RS-B121_bin23.metabat2	Bacteria	Proteobacteria	Alphaproteobacteria	Rhizobiales	Xanthobacteraceae	U87765	Unassign	291	272518	9287161	63.9	56700	95.41	4.08	26
SGB1727	RS-B121_bin25.metabat2	Bacteria	Proteobacteria	Alphaproteobacteria	Sphingomonadales	Sphingomonadaceae	Sphingobium	Sphingobium yanoikuyae	535	11940	2132660	65.38	3930	50.6	3.96	0
SGB1728	RS-B121_bin33.metabat2	Bacteria	Proteobacteria	Alphaproteobacteria	Rhizobiales	Rhizobiaceae	Rhizobium	Unassign	131	386988	6064856	61.68	85268	93.46	1.56	58
SGB1729	RS-B121_bin4.metabat2	Bacteria	Proteobacteria	Alphaproteobacteria	Rhizobiales	Rhizobiaceae	Rhizobium	Rhizobium sp009498525	175	299285	7391579	60.47	98562	98.24	5.58	2
SGB1730	RS-B121_bin44.metabat2	Bacteria	Proteobacteria	Alphaproteobacteria	Rhizobiales	Rhizobiaceae	Mesorhizobium	Unassign	793	120379	5443420	64.43	8102	79.96	7.94	0
SGB1731	RS-B121_bins27.concoct	Bacteria	Proteobacteria	Gammaproteobacteria	Pseudomonadales	Moraxellaceae	Acinetobacter	Acinetobacter seifertii	619	61020	2530429	39.25	4409	58.21	2.07	0
SGB1732	RS-B121_bins35.concoct	Bacteria	Proteobacteria	Gammaproteobacteria	Burkholderiales	Burkholderiaceae	Ideonella_A	Unassign	736	48528	6403197	68.63	10981	81.55	9.66	17
SGB1733	RS-B121_bins50.concoct	Bacteria	Proteobacteria	Alphaproteobacteria	Sphingomonadales	Sphingomonadaceae	Sphingobium	Unassign	201	135074	4612200	63.4	35600	96.62	1.25	20
SGB1734	RS-B121_bins53.concoct	Bacteria	Acidobacteriota	Vicinamibacteria	Vicinamibacterales	UBA2999	WHSN01	Unassign	263	106030	3634902	64.52	18144	89.3	6.15	0
SGB1735	RS-B121_bins56.concoct	Bacteria	Proteobacteria	Gammaproteobacteria	Steroidobacterales	Steroidobacteraceae	CAILZL01	Unassign	741	13562	2915566	57.93	4277	68.37	2.23	0
SGB1736	RS-B122_bin17.metabat2	Bacteria	Bacteroidota	Bacteroidia	Sphingobacteriales	Sphingobacteriaceae	Sphingobacterium	Sphingobacterium siyangense	430	111248	6087507	39.91	22212	97.22	2.88	5
SGB1737	RS-B122_bin20.metabat2	Bacteria	Proteobacteria	Alphaproteobacteria	Rhizobiales	Xanthobacteraceae	Pseudolabrys	Unassign	383	73988	4334808	57.78	18102	60.34	1.72	0
SGB1738	RS-B122_bin22.metabat2	Bacteria	Proteobacteria	Gammaproteobacteria	Enterobacterales	Enterobacteriaceae	Lelliottia	Lelliottia jeotgali	286	93367	4264220	54.52	20692	54.47	3.45	26
SGB1739	RS-B122_bin30.metabat2	Bacteria	Proteobacteria	Gammaproteobacteria	Pseudomonadales	Pseudomonadaceae	Pseudomonas_E	Pseudomonas_E kribbensis	80	264280	4960048	60.5	117318	81.03	6.9	21
SGB1740	RS-B122_bin32.metabat2	Bacteria	Bacteroidota	Bacteroidia	Flavobacteriales	Flavobacteriaceae	Flavobacterium	Unassign	199	107784	3436815	38.06	24002	98.76	0.18	4
SGB1741	RS-B122_bin4.metabat2	Bacteria	Proteobacteria	Gammaproteobacteria	Enterobacterales	Enterobacteriaceae	UBA7405	Unassign	206	192718	4328814	54.8	35800	59.12	1.72	4
SGB1742	RS-B122_bin44.metabat2	Bacteria	Bacteroidota	Bacteroidia	Chitinophagales	Chitinophagaceae	Puia	Unassign	686	18823	3648494	42.02	5915	60.34	0	0
SGB1743	RS-B122_bin45.metabat2	Bacteria	Proteobacteria	Gammaproteobacteria	Xanthomonadales	Rhodanobacteraceae	66-474	Unassign	346	25941	1946179	65.25	6220	74.6	1.21	0
SGB1744	RS-B122_bins10.concoct	Bacteria	Bacteroidota	Bacteroidia	Flavobacteriales	Weeksellaceae	Chryseobacterium	Unassign	338	89482	4993180	36.99	21970	91.73	0.25	8
SGB1745	RS-B122_bins11.concoct	Bacteria	Actinobacteriota	Thermoleophilia	Solirubrobacterales	1970-09-01	Unassign	Unassign	254	47684	2359633	67.23	13006	85.34	1.22	1
SGB1746	RS-B122_bins23.concoct	Bacteria	Actinobacteriota	Actinomycetia	Streptomycetales	Catenulisporaceae	Actinospica	Unassign	519	32843	4247533	69.54	9318	74.47	2.52	214
SGB1747	RS-B122_bins38.concoct	Bacteria	Actinobacteriota	Actinomycetia	Actinomycetales	Microbacteriaceae	Microbacterium	Unassign	218	54268	3232578	70.53	20331	93.48	1.52	14
SGB1748	RS-B122_bins49.concoct	Bacteria	Proteobacteria	Gammaproteobacteria	Xanthomonadales	Xanthomonadaceae	Stenotrophomonas	Stenotrophomonas sp003086795	370	201199	4432860	67.45	16592	89.91	0.97	29
SGB1749	RS-B123_bin20.metabat2	Bacteria	Proteobacteria	Gammaproteobacteria	Burkholderiales	Unassign	Unassign	Unassign	223	20337	1267927	54.52	6201	79.42	1.41	0
SGB1750	RS-B123_bin23.metabat2	Bacteria	Actinobacteriota	Acidimicrobiia	Acidimicrobiales	Ilumatobacteraceae	JAENVT01	Unassign	505	57148	4263948	66.01	11001	87.08	1.28	2
SGB1751	RS-B123_bin3.metabat2	Bacteria	Proteobacteria	Alphaproteobacteria	Rhizobiales	Methyloligellaceae	Methyloceanibacter	Unassign	364	34238	2062511	62.07	6612	86.23	9.07	1
SGB1752	RS-B123_bin32.metabat2	Bacteria	Acidobacteriota	Blastocatellia	Pyrinomonadales	Pyrinomonadaceae	PSRF01	Unassign	659	15307	3007397	54.62	4703	52.32	2.56	0
SGB1753	RS-B123_bin6.metabat2	Bacteria	Proteobacteria	Alphaproteobacteria	Rhizobiales	Xanthobacteraceae	Palsa-892	Unassign	196	33824	1672791	57.05	11367	63.79	0	0
SGB1754	RS-B123_bins1.concoct	Bacteria	Firmicutes	Bacilli	Bacillales_B	DSM-18226	Neobacillus	Neobacillus drentensis	459	68640	4325609	39.18	13080	92.08	3.5	0
SGB1755	RS-B123_bins10.concoct	Bacteria	Bacteroidota	Bacteroidia	Flavobacteriales	Weeksellaceae	Chryseobacterium	Chryseobacterium sp002979455	568	12759	1873954	36.39	3270	52.36	0.83	0
SGB1756	RS-B124.bins017.maxbin	Bacteria	Proteobacteria	Alphaproteobacteria	Sphingomonadales	Sphingomonadaceae	Sphingobium	Unassign	100	128610	2572576	64.95	63099	91.57	1.66	0
SGB1757	RS-B124_bin11.metabat2	Bacteria	Bacteroidota	Bacteroidia	Chitinophagales	Chitinophagaceae	Chitinophaga	Unassign	474	63979	4420019	44.93	11326	90.48	0.16	6
SGB1758	RS-B124_bin14.metabat2	Bacteria	Actinobacteriota	Actinomycetia	Mycobacteriales	Mycobacteriaceae	Mycobacterium	Unassign	127	212700	5766757	65.76	80193	100	0.45	35
SGB1759	RS-B124_bin18.metabat2	Bacteria	Proteobacteria	Alphaproteobacteria	Rhizobiales	Rhizobiaceae	Rhizobium	Rhizobium multihospitium	607	122181	6510809	59.74	16192	53.45	0.86	1
SGB1760	RS-B124_bin26.metabat2	Bacteria	Bacteroidota	Bacteroidia	Chitinophagales	Chitinophagaceae	Filimonas	Unassign	482	70076	5351982	45.06	14783	95.18	0.74	7
SGB1761	RS-B124_bin3.metabat2	Bacteria	Actinobacteriota	Actinomycetia	Streptosporangiales	Streptosporangiaceae	Trebonia	Unassign	777	45818	4276942	70.08	5847	75.18	2.99	100
SGB1762	RS-B124_bin7.metabat2	Bacteria	Proteobacteria	Alphaproteobacteria	Rhizobiales	Rhizobiaceae	Rhizobium	Unassign	308	220781	7466055	59.25	41255	89.55	3.97	0
SGB1763	RS-B125.bins001.maxbin	Bacteria	Proteobacteria	Gammaproteobacteria	Enterobacterales	Enterobacteriaceae	Serratia_A	Unassign	120	385372	5754416	53.78	108425	99.81	2.58	26
SGB1764	RS-B125_bin28.metabat2	Bacteria	Proteobacteria	Gammaproteobacteria	Pseudomonadales	Moraxellaceae	Acinetobacter	Acinetobacter sp002367455	166	79409	2645031	43.53	22909	92.59	0.55	7
SGB1765	RS-B125_bin4.metabat2	Bacteria	Bacteroidota	Bacteroidia	Flavobacteriales	Weeksellaceae	Chryseobacterium	Unassign	236	83122	4295140	33.44	29470	98.16	0.16	10
SGB1766	RS-B125_bins17.concoct	Bacteria	Actinobacteriota	Thermoleophilia	Solirubrobacterales	1970-09-01	VAYN01	Unassign	416	17541	1522537	68.28	3790	52.1	0.43	0
SGB1767	RS-B125_bins28.concoct	Bacteria	Proteobacteria	Gammaproteobacteria	Enterobacterales	Enterobacteriaceae	Providencia	Unassign	274	83261	4412726	41.68	23196	96.67	1.71	0
SGB1768	RS-B125_bins36.concoct	Bacteria	Proteobacteria	Gammaproteobacteria	Burkholderiales	Burkholderiaceae	Massilia	Unassign	304	66951	3811658	64.74	18378	93.14	1.24	0
SGB1769	RS-B127_bin21.metabat2	Bacteria	Proteobacteria	Alphaproteobacteria	Rhizobiales	Xanthobacteraceae	Pseudolabrys	Unassign	856	40451	4607030	59.95	5895	71.92	3.01	1
SGB1770	RS-B127_bin7.metabat2	Bacteria	Actinobacteriota	Actinomycetia	Mycobacteriales	Pseudonocardiaceae	Unassign	Unassign	656	49131	5809117	70.54	11615	90.03	2.88	107
SGB1771	RS-B128.bins025.maxbin	Bacteria	Bacteroidota	Bacteroidia	Flavobacteriales	Flavobacteriaceae	Flavobacterium	Flavobacterium chilense	264	170911	5530266	33.7	34165	73.95	0	8
SGB1772	RS-B128_bin30.metabat2	Bacteria	Actinobacteriota	Actinomycetia	Streptomycetales	Streptomycetaceae	Streptomyces	Unassign	1273	16972	5543087	70.24	4477	60.38	3.45	48
SGB1773	RS-B128_bin32.metabat2	Bacteria	Actinobacteriota	Actinomycetia	Mycobacteriales	Mycobacteriaceae	Mycobacterium	Unassign	1174	38751	6766558	66.22	6601	72.6	7.32	4
SGB1774	RS-B128_bin45.metabat2	Bacteria	Proteobacteria	Gammaproteobacteria	Burkholderiales	Burkholderiaceae	Massilia	Unassign	144	299916	5177476	64.96	57218	96.33	2.32	10
SGB1775	RS-B128_bin61.metabat2	Bacteria	Bacteroidota	Bacteroidia	Flavobacteriales	Flavobacteriaceae	Flavobacterium	Unassign	416	47435	3677720	41.14	10580	91.76	1.06	1
SGB1776	RS-B128_bin79.metabat2	Bacteria	Firmicutes	Bacilli	Bacillales	Bacillaceae_G	Gottfriedia	Unassign	525	70002	5200924	33.09	14981	96.49	3.75	0
SGB1777	RS-B128_bin8.metabat2	Bacteria	Bacteroidota	Bacteroidia	Flavobacteriales	Flavobacteriaceae	Flavobacterium	Unassign	219	143412	4859844	32.89	33516	93.96	1.08	14
SGB1778	RS-B128_bins0.concoct	Bacteria	Bacteroidota	Bacteroidia	Sphingobacteriales	Sphingobacteriaceae	Pedobacter	Unassign	97	271700	5335721	39.06	85695	97.45	0	1
SGB1779	RS-B128_bins46.concoct	Bacteria	Proteobacteria	Alphaproteobacteria	Sphingomonadales	Sphingomonadaceae	Sphingomonas	Unassign	568	18288	2794222	67.28	5539	50	2.87	0
SGB1780	RS-B128_bins50.concoct	Bacteria	Actinobacteriota	Actinomycetia	Actinomycetales	Microbacteriaceae	Microbacterium	Microbacterium ginsengisoli	361	21207	1921421	69.6	6204	57.25	1.81	0
SGB1781	RS-B128_bins72.concoct	Bacteria	Bacteroidota	Bacteroidia	Sphingobacteriales	Sphingobacteriaceae	Sphingobacterium	Sphingobacterium siyangense	196	314604	6609441	39.75	52868	98.89	5.98	5
SGB1782	RS-B128_bins78.concoct	Bacteria	Proteobacteria	Gammaproteobacteria	Burkholderiales	Burkholderiaceae	Hydrogenophaga	Hydrogenophaga sp011388215	360	71371	3133413	70.11	10232	78.64	3.22	0
SGB1783	RS-B129_bin19.metabat2	Bacteria	Actinobacteriota	Actinomycetia	Streptomycetales	Streptomycetaceae	Streptomyces	Streptomyces sp006540305	798	13741	3201630	70.91	4079	50.59	1.72	0
SGB1784	RS-B129_bin23.metabat2	Bacteria	Actinobacteriota	Thermoleophilia	Solirubrobacterales	Solirubrobacteraceae	Palsa-465	Unassign	417	56492	4111921	67.87	14188	84.22	3.42	28
SGB1785	RS-B129_bin4.metabat2	Bacteria	Actinobacteriota	Thermoleophilia	Solirubrobacterales	Solirubrobacteraceae	Palsa-744	Unassign	298	10898	1226514	70.54	4173	50.36	0.12	0
SGB1786	RS-B129_bins66.concoct	Bacteria	Proteobacteria	Gammaproteobacteria	Xanthomonadales	Rhodanobacteraceae	Dyella_B	Unassign	551	120929	6864128	59.82	17413	77.07	1.72	5
SGB1787	RS-B130_bin10.metabat2	Bacteria	Proteobacteria	Alphaproteobacteria	Sphingomonadales	Sphingomonadaceae	Sphingobium	Unassign	445	42272	3456290	64.8	10293	55.23	3.45	0
SGB1788	RS-B130_bin11.metabat2	Bacteria	Proteobacteria	Alphaproteobacteria	Sphingomonadales	Sphingomonadaceae	Sphingobium	Unassign	350	55060	2677825	64.15	9797	55.21	0	9
SGB1789	RS-B130_bin21.metabat2	Bacteria	Proteobacteria	Alphaproteobacteria	Rhizobiales	Rhizobiaceae	Allorhizobium	Unassign	406	52528	5131070	55.81	17956	93.83	1.47	1
SGB1790	RS-B130_bin22.metabat2	Bacteria	Verrucomicrobiota	Verrucomicrobiae	Chthoniobacterales	UBA10450	Udaeobacter	Unassign	311	19744	1848069	54.88	6518	59.98	1.61	0
SGB1791	RS-B130_bin25.metabat2	Bacteria	Proteobacteria	Gammaproteobacteria	Burkholderiales	Burkholderiaceae	Herbaspirillum	Unassign	132	172132	5311678	60.48	69999	97.16	0.93	5
SGB1792	RS-B130_bin34.metabat2	Bacteria	Proteobacteria	Alphaproteobacteria	Rhizobiales	Xanthobacteraceae	JAFAXD01	Unassign	1028	35950	5806839	61.96	6191	64.67	4.03	0
SGB1793	RS-B130_bin53.metabat2	Bacteria	Actinobacteriota	Acidimicrobiia	Acidimicrobiales	RAAP-2	Bog-756	Unassign	388	30594	2379038	70.99	6955	73.21	2.78	0
SGB1794	RS-B130_bin6.metabat2	Bacteria	Actinobacteriota	Acidimicrobiia	IMCC26256	PALSA-555	PALSA-555	Unassign	439	19302	2303164	73.14	5715	70.64	0	1
SGB1795	RS-B130_bin61.metabat2	Bacteria	Proteobacteria	Gammaproteobacteria	Burkholderiales	Burkholderiaceae	Ralstonia	Unassign	729	35314	4597990	64.46	7325	65.86	1.72	4
SGB1796	RS-B130_bin7.metabat2	Bacteria	Chloroflexota	UBA5177	UBA5177	UBA5177	Unassign	Unassign	484	22466	2461311	61.21	5348	69.65	1.98	0
SGB1797	RS-B130_bins74.concoct	Bacteria	Proteobacteria	Gammaproteobacteria	Enterobacterales	Enterobacteriaceae	Serratia	Serratia ureilytica	458	52995	4707413	59.92	13634	93.75	0.6	8
SGB1798	RS-B130R.bins007.maxbin	Bacteria	Cyanobacteria	Vampirovibrionia	Vampirovibrionales	Vampirovibrionaceae	Unassign	Unassign	342	43301	3006445	55.05	11943	92.66	1.71	0
SGB1799	RS-B130R_bin10.metabat2	Bacteria	Proteobacteria	Gammaproteobacteria	Enterobacterales	Enterobacteriaceae	Scandinavium	Scandinavium sp002470465	285	176777	3991491	55.83	22300	64.29	0	8
SGB1800	RS-B130R_bin27.metabat2	Bacteria	Proteobacteria	Gammaproteobacteria	Enterobacterales	Enterobacteriaceae	Enterobacter	Enterobacter soli	81	160086	3073411	54.34	54343	58.93	0	24
SGB1801	RS-B130R_bin32.metabat2	Bacteria	Proteobacteria	Alphaproteobacteria	Sphingomonadales	Sphingomonadaceae	Sphingobium	Unassign	144	81208	2534123	60.6	24196	89.86	0.62	0
SGB1802	RS-B130R_bin9.metabat2	Bacteria	Acidobacteriota	Vicinamibacteria	Vicinamibacterales	SCN-69-37	Unassign	Unassign	408	47822	3814433	65.56	12624	92.59	9.85	0
SGB1803	RS-B130R_bins0.concoct	Bacteria	Nitrospirota	Nitrospiria	Nitrospirales	Nitrospiraceae	Palsa-1315	Unassign	559	26048	1683753	55.21	2928	51.62	5	0
SGB1804	RS-B131_bin11.metabat2	Bacteria	Proteobacteria	Alphaproteobacteria	Sphingomonadales	Sphingomonadaceae	Blastomonas	Blastomonas ursincola	49	216212	3769538	64.78	120099	98.44	0.34	11
SGB1805	RS-B131_bin23.metabat2	Bacteria	Methylomirabilota	Methylomirabilia	Rokubacteriales	CSP1-6	Unassign	Unassign	861	15810	3872567	71.02	4751	62.01	3.27	0
SGB1806	RS-B131_bin25.metabat2	Bacteria	Proteobacteria	Gammaproteobacteria	Burkholderiales	Burkholderiaceae	Unassign	Unassign	320	96827	4370009	69.33	20017	90.83	4.99	0
SGB1807	RS-B131_bin27.metabat2	Bacteria	Acidobacteriota	Blastocatellia	UBA7656	UBA7656	Unassign	Unassign	875	20909	4323850	57.47	5164	60.56	2.78	3
SGB1808	RS-B131_bin42.metabat2	Bacteria	Acidobacteriota	Acidobacteriae	Acidobacteriales	SbA1	Sulfotelmatobacter	Unassign	420	127318	7125866	56.67	32449	87.89	4.27	10
SGB1809	RS-B131_bin7.metabat2	Bacteria	Proteobacteria	Alphaproteobacteria	Rhizobiales	Xanthobacteraceae	VAZQ01	Unassign	250	50152	2407615	68.29	13289	65	0	0
SGB1810	RS-B131_bin9.metabat2	Bacteria	Proteobacteria	Alphaproteobacteria	Rhizobiales	Xanthobacteraceae	VAZQ01	Unassign	454	39304	3567218	66.16	9684	82.83	2.69	1
SGB1811	RS-B131_bins44.concoct	Bacteria	Acidobacteriota	Thermoanaerobaculia	Gp7-AA8	Gp7-AA8	Unassign	Unassign	937	11784	3005308	65.9	3215	51.39	2.92	0
SGB1812	RS-B131_bins47.concoct	Bacteria	Acidobacteriota	Acidobacteriae	Acidobacteriales	Gp1-AA117	Gp1-AA17	Unassign	693	25567	3348730	54.75	5446	57.44	2.09	0
SGB1813	RS-B131_bins58.concoct	Bacteria	Proteobacteria	Alphaproteobacteria	Dongiales	Dongiaceae	Unassign	Unassign	814	10390	2691990	66.68	3369	54.12	0.44	0
SGB1814	RS-B132_bin1.metabat2	Bacteria	Proteobacteria	Gammaproteobacteria	Burkholderiales	Burkholderiaceae	Mitsuaria	Mitsuaria sp900113225	144	195092	5845777	69.93	71293	96.86	1.16	15
SGB1815	RS-B132_bin24.metabat2	Bacteria	Proteobacteria	Alphaproteobacteria	Rhizobiales	Rhizobiaceae	Agrobacterium	Agrobacterium sp900013535	64	532481	5491722	59.36	270442	97.46	1.84	27
SGB1816	RS-B132_bin4.metabat2	Bacteria	Acidobacteriota	Acidobacteriae	Acidobacteriales	SbA1	Gp1-AA145	Unassign	32	437052	3577134	56.62	251421	86.91	0.85	60
SGB1817	RS-B132_bin5.metabat2	Bacteria	Acidobacteriota	Acidobacteriae	Acidoferrales	UBA7541	Acidoferrum	Unassign	1104	95596	6133286	58.16	5822	51.88	4.31	0
SGB1818	RS-B132_bin7.metabat2	Bacteria	Verrucomicrobiota	Verrucomicrobiae	Chthoniobacterales	UBA10450	AV40	Unassign	261	12072	1052889	55.33	3883	50.76	4.85	0
SGB1819	RS-B135_bin42.metabat2	Bacteria	Verrucomicrobiota	Verrucomicrobiae	Chthoniobacterales	UBA10450	AV40	Unassign	40	224097	2151621	55.76	68591	90.04	6.76	0
SGB1820	RS-B135_bin47.metabat2	Bacteria	Proteobacteria	Alphaproteobacteria	Caulobacterales	Caulobacteraceae	Palsa-881	Unassign	430	47345	2669073	67.52	7213	84.87	3.44	1
SGB1821	RS-B135_bin54.metabat2	Bacteria	Methylomirabilota	Methylomirabilia	Rokubacteriales	CSP1-6	Unassign	Unassign	864	14990	3558049	70.23	4111	57.02	4.64	0
SGB1822	RS-B135_bins28.concoct	Bacteria	Actinobacteriota	Thermoleophilia	Solirubrobacterales	Solirubrobacteraceae	Palsa-465	Unassign	319	25781	1752315	66.18	6616	81.41	1.83	0
SGB1823	RS-B135_bins29.concoct	Bacteria	Proteobacteria	Gammaproteobacteria	Steroidobacterales	Steroidobacteraceae	FEN-1191	Unassign	373	22142	2225008	65.9	6947	72.27	2.92	0
SGB1824	RS-B136.bins021.maxbin	Bacteria	Verrucomicrobiota	Verrucomicrobiae	Chthoniobacterales	UBA10450	AV40	Unassign	305	28368	1634236	55.6	6703	64.27	2.06	0
SGB1825	RS-B136_bin41.metabat2	Bacteria	Acidobacteriota	Blastocatellia	Pyrinomonadales	Pyrinomonadaceae	PSRF01	Unassign	489	71120	6840908	54.48	18689	93.99	4.5	191
SGB1826	RS-B138.bins097.maxbin	Bacteria	Proteobacteria	Gammaproteobacteria	Burkholderiales	SG8-39	JAGVSZ01	Unassign	1059	72473	3783072	69.86	3513	56	4.5	0
SGB1827	RS-B138_bin106.metabat2	Bacteria	Proteobacteria	Alphaproteobacteria	Micropepsales	Micropepsaceae	Rhizomicrobium	Unassign	320	46347	2488741	63.07	9891	51.8	3.1	1
SGB1828	RS-B138_bin107.metabat2	Bacteria	Acidobacteriota	Thermoanaerobaculia	UBA5704	UBA5704	UBA5704	Unassign	777	53268	7038439	68.52	11853	76.97	2.74	34
SGB1829	RS-B138_bin110.metabat2	Bacteria	Proteobacteria	Alphaproteobacteria	Sphingomonadales	Sphingomonadaceae	Sphingobium	Unassign	376	72079	4085977	63.56	15489	71.19	5.33	8
SGB1830	RS-B138_bin127.metabat2	Bacteria	Actinobacteriota	Acidimicrobiia	IMCC26256	PALSA-610	Unassign	Unassign	554	36517	4159461	66.08	9787	86.04	1.57	0
SGB1831	RS-B138_bin132.metabat2	Bacteria	Acidobacteriota	Acidobacteriae	Acidobacteriales	Acidobacteriaceae	Terracidiphilus	Unassign	181	86822	2651676	60.35	20908	55.12	1.01	1
SGB1832	RS-B138_bin134.metabat2	Bacteria	Verrucomicrobiota	Verrucomicrobiae	Chthoniobacterales	JAFAMB01	Unassign	Unassign	312	50694	3216614	54.08	12849	85.2	3.38	0
SGB1833	RS-B138_bin136.metabat2	Bacteria	Cyanobacteria	Vampirovibrionia	Obscuribacterales	Obscuribacteraceae	CAJCIF01	Unassign	477	58305	4736167	47.63	11682	86.65	2.56	2
SGB1834	RS-B138_bin138.metabat2	Bacteria	Planctomycetota	Planctomycetia	Planctomycetales	UBA10511	JACQFH01	Unassign	1251	15246	5483652	62.45	4448	51.7	2.37	0
SGB1835	RS-B138_bin146.metabat2	Bacteria	Chloroflexota	Ktedonobacteria	Ktedonobacterales	Ktedonobacteraceae	Unassign	Unassign	509	49471	5335920	51.41	12195	77.89	2.97	2
SGB1836	RS-B138_bin149.metabat2	Bacteria	Proteobacteria	Alphaproteobacteria	Sphingomonadales	Sphingomonadaceae	Sphingomicrobium	Unassign	188	62612	2379177	62.67	18112	86.66	1.33	5
SGB1837	RS-B138_bin151.metabat2	Bacteria	Proteobacteria	Gammaproteobacteria	Burkholderiales	Burkholderiaceae	JAFEEF01	Unassign	327	333117	8075525	66.85	39627	97.92	8.25	54
SGB1838	RS-B138_bin166.metabat2	Bacteria	Verrucomicrobiota	Verrucomicrobiae	Chthoniobacterales	JAFAMB01	Unassign	Unassign	238	56871	2695716	52.69	15043	93.24	5.41	1
SGB1839	RS-B138_bin167.metabat2	Bacteria	Bacteroidota	Bacteroidia	Chitinophagales	Chitinophagaceae	Puia	Unassign	485	57515	4230427	54.27	10366	74.36	3.2	4
SGB1840	RS-B138_bin171.metabat2	Bacteria	Verrucomicrobiota	Verrucomicrobiae	Chthoniobacterales	JAFAMB01	Unassign	Unassign	307	26748	2070373	53.44	7690	71.46	8.78	1
SGB1841	RS-B138_bin172.metabat2	Bacteria	Proteobacteria	Alphaproteobacteria	Dongiales	Dongiaceae	Unassign	Unassign	325	100537	4000826	63.13	18994	84.54	2.18	4
SGB1842	RS-B138_bin174.metabat2	Bacteria	Proteobacteria	Alphaproteobacteria	Caulobacterales	Caulobacteraceae	Palsa-881	Unassign	275	68656	3328258	67.11	20165	85.32	3.66	1
SGB1843	RS-B138_bin182.metabat2	Bacteria	Verrucomicrobiota	Verrucomicrobiae	Pedosphaerales	UBA9464	Unassign	Unassign	144	271668	5199697	66.68	64393	96.62	4.39	23
SGB1844	RS-B138_bin186.metabat2	Bacteria	Planctomycetota	Planctomycetia	Gemmatales	Gemmataceae	Unassign	Unassign	856	32889	4822756	63.29	6397	72.94	3.14	0
SGB1845	RS-B138_bin192.metabat2	Bacteria	Patescibacteria	Saccharimonadia	Saccharimonadales	UBA4665	PMNU01	Unassign	11	249588	1256268	55.55	210385	68.52	0	0
SGB1846	RS-B138_bin194.metabat2	Bacteria	Bacteroidota	Bacteroidia	Cytophagales	Cyclobacteriaceae	ELB16-189	Unassign	522	23989	3251549	43.7	6973	65.16	0	5
SGB1847	RS-B138_bin204.metabat2	Bacteria	Bacteroidota	Bacteroidia	Chitinophagales	Chitinophagaceae	Puia	Unassign	430	26178	2500053	48.02	6290	62.07	0	1
SGB1848	RS-B138_bin213.metabat2	Bacteria	Actinobacteriota	Acidimicrobiia	Acidimicrobiales	Palsa-688	Unassign	Unassign	495	30654	2772318	66.58	6476	51.32	4.99	0
SGB1849	RS-B138_bin218.metabat2	Bacteria	Acidobacteriota	Thermoanaerobaculia	UBA5704	UBA5704	UBA5704	Unassign	1154	13036	4859449	68.33	4318	50	4.31	0
SGB1850	RS-B138_bin220.metabat2	Bacteria	Acidobacteriota	Acidobacteriae	Acidobacteriales	SbA1	Sulfotelmatobacter	Unassign	83	434840	4854291	55.82	144772	95.56	5.41	9
SGB1851	RS-B138_bin228.metabat2	Bacteria	Proteobacteria	Gammaproteobacteria	Steroidobacterales	Steroidobacteraceae	Bog-1198	Unassign	577	53754	3460986	63.09	6723	65.83	4.17	0
SGB1852	RS-B138_bin23.metabat2	Bacteria	Myxococcota	Polyangia	Polyangiales	Polyangiaceae	Unassign	Unassign	694	77638	9438909	67.86	20069	91.56	7.44	0
SGB1853	RS-B138_bin24.metabat2	Bacteria	Actinobacteriota	Actinomycetia	Mycobacteriales	Mycobacteriaceae	Nocardia	Nocardia sp018860155	711	53704	6953849	68.58	12471	82.94	1.93	34
SGB1854	RS-B138_bin247.metabat2	Bacteria	Acidobacteriota	Acidobacteriae	Bryobacterales	Bryobacteraceae	PALSA-129	Unassign	798	80981	8057643	61.72	15817	88.71	6.52	1
SGB1855	RS-B138_bin249.metabat2	Bacteria	Verrucomicrobiota	Verrucomicrobiae	Methylacidiphilales	UBA1321	JABDGH01	Unassign	167	75915	3076024	57.39	27165	91.21	0.81	0
SGB1856	RS-B138_bin255.metabat2	Bacteria	Verrucomicrobiota	Verrucomicrobiae	Pedosphaerales	Pedosphaeraceae	Unassign	Unassign	404	89414	5253403	59.29	17626	79.47	6.9	16
SGB1857	RS-B138_bin257.metabat2	Bacteria	Proteobacteria	Alphaproteobacteria	Rhizobiales	Xanthobacteraceae	Pseudolabrys	Unassign	332	95123	4323576	58.43	24516	70.85	6.9	1
SGB1858	RS-B138_bin265.metabat2	Bacteria	Verrucomicrobiota	Verrucomicrobiae	Chthoniobacterales	JAFAMB01	Unassign	Unassign	285	57932	1817552	53.43	6275	50.4	3.7	0
SGB1859	RS-B138_bin280.metabat2	Bacteria	Acidobacteriota	Acidobacteriae	Acidobacteriales	Acidobacteriaceae	Terracidiphilus	Unassign	322	228501	8674123	59.49	55578	95.36	6.21	0
SGB1860	RS-B138_bin284.metabat2	Bacteria	Proteobacteria	Gammaproteobacteria	Xanthomonadales	Xanthomonadaceae	Stenotrophomonas	Unassign	211	93285	3972530	67.02	30966	82.76	0	18
SGB1861	RS-B138_bin286.metabat2	Bacteria	Myxococcota	Myxococcia	Myxococcales	Myxococcaceae	RPRB01	Unassign	478	71855	5203631	70.36	14975	87.69	3.44	5
SGB1862	RS-B138_bin289.metabat2	Bacteria	Proteobacteria	Alphaproteobacteria	Caulobacterales	Caulobacteraceae	Brevundimonas	Brevundimonas sp003248925	138	141556	3149831	69.34	32800	97.8	1.82	0
SGB1863	RS-B138_bin30.metabat2	Bacteria	Gemmatimonadota	Gemmatimonadetes	Gemmatimonadales	GWC2-71-9	Unassign	Unassign	395	35667	2868720	67.55	8922	82.88	2.33	1
SGB1864	RS-B138_bin45.metabat2	Bacteria	Verrucomicrobiota	Verrucomicrobiae	Pedosphaerales	UBA11358	UBA11358	Unassign	91	409845	4911740	56.04	86836	98.65	3.04	5
SGB1865	RS-B138_bin62.metabat2	Bacteria	Acidobacteriota	Acidobacteriae	Acidobacteriales	Acidobacteriaceae	Terracidiphilus	Unassign	201	73008	3401595	59.95	22839	83.88	5.82	1
SGB1866	RS-B138_bin66.metabat2	Bacteria	Verrucomicrobiota	Verrucomicrobiae	Pedosphaerales	Pedosphaeraceae	Unassign	Unassign	57	219401	3971430	59.64	141779	98.65	0.68	1
SGB1867	RS-B138_bin7.metabat2	Bacteria	Actinobacteriota	Thermoleophilia	Solirubrobacterales	Solirubrobacteraceae	Palsa-744	Unassign	178	111251	2928847	70.42	26953	93.02	3.56	121
SGB1868	RS-B138_bin75.metabat2	Bacteria	Proteobacteria	Alphaproteobacteria	Sphingomonadales	Sphingomonadaceae	Sphingopyxis	Unassign	573	17569	2351459	66.16	4055	50	3.45	0
SGB1869	RS-B138_bin80.metabat2	Bacteria	Actinobacteriota	Thermoleophilia	Solirubrobacterales	Solirubrobacteraceae	Palsa-465	Unassign	515	27453	2787319	70.14	5973	60.16	2.14	0
SGB1870	RS-B138_bin82.metabat2	Bacteria	Methylomirabilota	Methylomirabilia	Rokubacteriales	CSP1-6	Unassign	Unassign	769	22512	4360619	71.33	6265	76.68	4.21	0
SGB1871	RS-B138_bin9.metabat2	Bacteria	Proteobacteria	Gammaproteobacteria	Steroidobacterales	Steroidobacteraceae	13-2-20CM-66-19	Unassign	202	82079	2449399	69.67	16997	53.45	0	2
SGB1872	RS-B138_bins100.concoct	Bacteria	Eremiobacterota	Eremiobacteria	Baltobacterales	Baltobacteraceae	Cybelea	Unassign	586	11412	1954001	62.21	3360	73.84	8.11	0
SGB1873	RS-B138_bins134.concoct	Bacteria	Acidobacteriota	Blastocatellia	DSOJ01	DSOJ01	Unassign	Unassign	1508	17426	5557840	48.19	3846	73.13	6.09	1
SGB1874	RS-B138_bins135.concoct	Bacteria	Myxococcota	Polyangia	Palsa-1104_A	Fen-1088	Unassign	Unassign	660	53579	6128770	69.78	11210	77.49	2.9	2
SGB1875	RS-B138_bins144.concoct	Bacteria	Actinobacteriota	Acidimicrobiia	IMCC26256	PALSA-610	Unassign	Unassign	713	40577	5052166	69.1	7575	59.64	1.72	0
SGB1876	RS-B138_bins157.concoct	Bacteria	Chloroflexota	Ktedonobacteria	Ktedonobacterales	Ktedonobacteraceae	Ktedonobacter	Ktedonobacter racemifer	1081	15764	4234248	54.74	4117	71.86	6.2	0
SGB1877	RS-B138_bins159.concoct	Bacteria	Chloroflexota	Anaerolineae	Aggregatilineales	UBA2796	Unassign	Unassign	1502	11642	4817957	52.89	3175	55.65	3.64	0
SGB1878	RS-B138_bins169.concoct	Bacteria	Planctomycetota	Planctomycetia	Gemmatales	Gemmataceae	Unassign	Unassign	295	123492	8026750	60.16	39670	90.84	5.11	2
SGB1879	RS-B138_bins68.concoct	Bacteria	Myxococcota	XYA12-FULL-58-9	XYA12-FULL-58-9	Unassign	Unassign	Unassign	545	50059	5710403	66.1	13453	89.46	2.71	27
SGB1880	RS-B138_bins88.concoct	Bacteria	Proteobacteria	Alphaproteobacteria	Sphingomonadales	Sphingomonadaceae	Blastomonas	Unassign	331	54026	3100001	63.63	11660	61.71	0	4
SGB1881	RS-B140_bin8.metabat2	Bacteria	Actinobacteriota	Thermoleophilia	Solirubrobacterales	Solirubrobacteraceae	Palsa-744	Unassign	210	76117	2914189	68.73	19233	93.8	3.42	70
SGB1882	RS-B140_bins19.concoct	Bacteria	Acidobacteriota	Blastocatellia	UBA7656	UBA7656	Unassign	Unassign	1188	26778	7520595	57.32	7068	78.21	5.7	21
SGB1883	RS-B140_bins79.concoct	Bacteria	Methylomirabilota	Methylomirabilia	Rokubacteriales	CSP1-6	Unassign	Unassign	531	20512	2965850	71.25	6009	60.5	0.96	1
SGB1884	RS-B141_bin13.metabat2	Bacteria	Bacteroidota	Bacteroidia	Flavobacteriales	Weeksellaceae	Chryseobacterium	Unassign	69	401052	3140994	37.54	72330	74.02	0	2
SGB1885	RS-B141_bin23.metabat2	Bacteria	Proteobacteria	Gammaproteobacteria	Enterobacterales	Enterobacteriaceae	Kosakonia	Unassign	171	261592	4904390	54.01	47571	73.39	0	17
SGB1886	RS-B141_bin8.metabat2	Bacteria	Proteobacteria	Alphaproteobacteria	Dongiales	Dongiaceae	Unassign	Unassign	648	12337	2642109	66.66	4168	59.29	2.18	0
SGB1887	RS-B141_bins16.concoct	Bacteria	Acidobacteriota	Acidobacteriae	Acidoferrales	UBA7541	Acidoferrum	Unassign	470	52162	4471732	57.7	12839	77.26	7.69	0
SGB1888	RS-B141_bins44.concoct	Bacteria	Proteobacteria	Alphaproteobacteria	Rhizobiales	Xanthobacteraceae	AP-16	Unassign	297	127211	6898580	65.79	38252	96.72	7.78	3
SGB1889	RS-B142_bin12.metabat2	Bacteria	Verrucomicrobiota	Verrucomicrobiae	Chthoniobacterales	JAFAMB01	Unassign	Unassign	592	21566	3110337	53.45	5629	76.13	7.09	0
SGB1890	RS-B142_bin15.metabat2	Bacteria	Acidobacteriota	Acidobacteriae	Acidoferrales	UBA7541	Acidoferrum	Unassign	419	64401	3542555	55.49	10083	65.49	0.85	0
SGB1891	RS-B143_bin18.metabat2	Bacteria	Proteobacteria	Gammaproteobacteria	Steroidobacterales	Steroidobacteraceae	FEN-1191	Unassign	84	254849	3515090	65.33	72720	96.56	1.21	0
SGB1892	RS-B143_bins32.concoct	Bacteria	Planctomycetota	Phycisphaerae	UBA1845	UTPLA1	Unassign	Unassign	642	24016	2690589	60.97	4565	50.39	1.14	0
SGB1893	RS-B143_bins33.concoct	Bacteria	Actinobacteriota	Thermoleophilia	Solirubrobacterales	1970-09-01	Unassign	Unassign	314	28678	1781765	67.4	6674	71.95	0.72	0
SGB1894	RS-B143_bins36.concoct	Bacteria	Chloroflexota	Limnocylindria	QHBO01	QHBO01	Unassign	Unassign	236	26022	1326423	70.47	6798	63.01	0	0
SGB1895	RS-B144.bins026.maxbin	Bacteria	Proteobacteria	Alphaproteobacteria	Micropepsales	Micropepsaceae	Unassign	Unassign	269	60045	2593931	63.46	17366	78.62	3.8	1
SGB1896	RS-B144_bin1.metabat2	Bacteria	Actinobacteriota	Thermoleophilia	Solirubrobacterales	Solirubrobacteraceae	Palsa-465	Unassign	792	18880	3650399	66.26	4808	62.12	2.31	0
SGB1897	RS-B144_bin11.metabat2	Bacteria	Proteobacteria	Gammaproteobacteria	Burkholderiales	Burkholderiaceae	Paraburkholderia	Unassign	243	338087	7543985	61.59	52234	95.7	4.01	25
SGB1898	RS-B144_bin15.metabat2	Bacteria	Verrucomicrobiota	Verrucomicrobiae	Chthoniobacterales	JAFAMB01	Unassign	Unassign	400	10913	1730728	53.73	4471	55.48	2.03	0
SGB1899	RS-B144_bin18.metabat2	Bacteria	Proteobacteria	Gammaproteobacteria	Burkholderiales	Burkholderiaceae	Cupriavidus	Cupriavidus pauculus_B	913	21335	4736720	65.57	5576	55.61	0	1
SGB1900	RS-B144_bin20.metabat2	Bacteria	Proteobacteria	Alphaproteobacteria	Rhizobiales	Rhizobiaceae	Rhizobium	Unassign	957	41973	6253233	60.19	7668	74.75	9.35	1
SGB1901	RS-B144_bin22.metabat2	Bacteria	Proteobacteria	Alphaproteobacteria	Sphingomonadales	Sphingomonadaceae	Sphingobium	Unassign	504	32351	3631222	63.23	9348	76.47	7.01	7
SGB1902	RS-B144_bin24.metabat2	Bacteria	Acidobacteriota	Acidobacteriae	Acidobacteriales	Acidobacteriaceae	Granulicella_A	Unassign	595	57372	5621678	56.6	12448	88.36	2.08	6
SGB1903	RS-B144_bin32.metabat2	Bacteria	Proteobacteria	Gammaproteobacteria	Burkholderiales	Burkholderiaceae	Pseudoduganella	Unassign	635	36497	3673000	61.87	6474	71.52	2.02	0
SGB1904	RS-B144_bins17.concoct	Bacteria	Actinobacteriota	Actinomycetia	Actinomycetales	Microbacteriaceae	Leifsonia	Unassign	286	94337	3978256	70.35	18054	88.69	2.58	7
SGB1905	RS-B144_bins54.concoct	Bacteria	Proteobacteria	Gammaproteobacteria	Xanthomonadales	Rhodanobacteraceae	Dyella	Unassign	602	46939	3623773	67.63	7180	68.97	3.45	3
SGB1906	RS-B144_bins71.concoct	Bacteria	Actinobacteriota	Acidimicrobiia	Acidimicrobiales	UBA8139	Unassign	Unassign	244	30532	2108031	70.62	10174	55.26	1.28	0
SGB1907	RS-B144_bins74.concoct	Bacteria	Firmicutes	Bacilli	Bacillales	Bacillaceae_G	Gottfriedia	Gottfriedia sp002564465	420	42956	3233534	33.27	10220	86.63	1.11	0
SGB1908	RS-B145.bins015.maxbin	Bacteria	Patescibacteria	Saccharimonadia	Saccharimonadales	UBA4665	Unassign	Unassign	18	252982	1094174	50.78	169579	84.33	1.88	0
SGB1909	RS-B145_bin30.metabat2	Bacteria	Proteobacteria	Gammaproteobacteria	Burkholderiales	Burkholderiaceae	Variovorax	Variovorax gossypii	1022	23345	5901780	68.12	6426	82.74	3.24	0
SGB1910	RS-B145_bin33.metabat2	Bacteria	Proteobacteria	Gammaproteobacteria	Enterobacterales	Enterobacteriaceae	Pantoea	Pantoea endophytica	140	144020	4290866	54.97	48103	74.64	0	32
SGB1911	RS-B145_bin45.metabat2	Bacteria	Proteobacteria	Alphaproteobacteria	Rhizobiales	Rhizobiaceae	Rhizobium	Unassign	306	149071	6897714	61.41	40012	90.53	4.86	61
SGB1912	RS-B145_bin7.metabat2	Bacteria	Proteobacteria	Alphaproteobacteria	Sphingomonadales	Sphingomonadaceae	Sphingobium	Sphingobium yanoikuyae	472	35447	2274173	64.93	4917	53.34	0.39	0
SGB1913	RS-B146.bins005.maxbin	Bacteria	Verrucomicrobiota	Verrucomicrobiae	Chthoniobacterales	JAFAMB01	Unassign	Unassign	678	30863	2230892	53.95	3316	54.27	0.86	0
SGB1914	RS-B146.bins021.maxbin	Bacteria	Acidobacteriota	Acidobacteriae	Bryobacterales	Bryobacteraceae	Unassign	Unassign	506	162527	5927488	61.32	43873	86.26	1.09	1
SGB1915	RS-B146_bin25.metabat2	Bacteria	Verrucomicrobiota	Verrucomicrobiae	Chthoniobacterales	UBA10450	AV40	Unassign	168	63254	2455619	55.2	20666	87.61	9.98	0
SGB1916	RS-B146_bins12.concoct	Bacteria	Proteobacteria	Gammaproteobacteria	Enterobacterales	Enterobacteriaceae	Kosakonia	Unassign	123	429687	5383012	53.86	84023	78.09	9.83	21
SGB1917	RS-B147.bins029.maxbin	Bacteria	Proteobacteria	Alphaproteobacteria	Caulobacterales	Caulobacteraceae	Caulobacter	Unassign	119	115415	3050522	69.13	36213	55.17	0	0
SGB1918	RS-B147.bins040.maxbin	Bacteria	Verrucomicrobiota	Verrucomicrobiae	Chthoniobacterales	UBA10450	AV40	Unassign	147	32266	1143403	55.36	10428	53.73	0.68	0
SGB1919	RS-B147_bin13.metabat2	Bacteria	Acidobacteriota	Acidobacteriae	Acidoferrales	UBA7541	Unassign	Unassign	25	360938	3732404	59.88	280540	94.02	3.42	0
SGB1920	RS-B147_bin14.metabat2	Bacteria	Proteobacteria	Alphaproteobacteria	Rhizobiales	Rhizobiaceae	Aquamicrobium_A	Unassign	149	220970	5082898	63.76	68918	96.76	3.56	0
SGB1921	RS-B147_bin27.metabat2	Bacteria	Proteobacteria	Gammaproteobacteria	Burkholderiales	Burkholderiaceae	Acidovorax	Unassign	169	151796	4505659	65.86	43464	97.25	0.9	0
SGB1922	RS-B147_bin35.metabat2	Bacteria	Proteobacteria	Alphaproteobacteria	Sphingomonadales	Sphingomonadaceae	Sphingobium	Sphingobium yanoikuyae	466	25603	2190324	65.42	4931	53.85	1.02	0
SGB1923	RS-B147_bin40.metabat2	Bacteria	Proteobacteria	Alphaproteobacteria	Rhizobiales	Xanthobacteraceae	BOG-931	Unassign	650	43569	3210337	60.64	5312	60.8	2.8	0
SGB1924	RS-B147_bin43.metabat2	Bacteria	Proteobacteria	Alphaproteobacteria	Caulobacterales	Caulobacteraceae	Phenylobacterium	Unassign	427	29527	2777722	69.27	7827	83.2	3.11	0
SGB1925	RS-B147_bin46.metabat2	Bacteria	Proteobacteria	Gammaproteobacteria	Pseudomonadales	Pseudomonadaceae	Pseudomonas_E	Unassign	153	326485	5225560	60.14	55079	70.35	0	9
SGB1926	RS-B147_bin6.metabat2	Bacteria	Proteobacteria	Alphaproteobacteria	Rhizobiales	Rhizobiaceae	Agrobacterium	Agrobacterium sp005938205	531	62414	3714837	57.66	8437	75.97	8.24	0
SGB1927	RS-B147_bin60.metabat2	Bacteria	Patescibacteria	Saccharimonadia	Saccharimonadales	UBA4665	Unassign	Unassign	12	254858	1082318	57.33	128725	55.09	0.93	0
SGB1928	RS-B147_bin62.metabat2	Bacteria	Proteobacteria	Alphaproteobacteria	Sphingomonadales	Sphingomonadaceae	Sphingopyxis	Sphingopyxis terrae	49	394697	3489466	65.12	120612	99.3	2.22	11
SGB1929	RS-B147_bin64.metabat2	Bacteria	Actinobacteriota	Acidimicrobiia	IMCC26256	PALSA-555	Unassign	Unassign	146	107780	2583952	68.15	30126	98.29	1.71	7
SGB1930	RS-B147_bin69.metabat2	Bacteria	Patescibacteria	Saccharimonadia	Saccharimonadales	UBA4665	Unassign	Unassign	58	82501	1061954	55.65	25183	64.67	0.85	0
SGB1931	RS-B147_bins21.concoct	Bacteria	Actinobacteriota	Actinomycetia	Mycobacteriales	Pseudonocardiaceae	Unassign	Unassign	981	44172	6268105	70.1	7098	64.13	1.71	20
SGB1932	RS-B147_bins80.concoct	Bacteria	Proteobacteria	Alphaproteobacteria	Unassign	Unassign	Unassign	Unassign	399	21166	1955542	65.23	5643	56.03	1.72	1
SGB1933	RS-C001.bins033.maxbin	Bacteria	Bacteroidota	Bacteroidia	Cytophagales	Spirosomaceae	Dyadobacter	Unassign	243	292510	8426017	44.54	65137	98.28	4.31	4
SGB1934	RS-C001_bin12.metabat2	Bacteria	Proteobacteria	Gammaproteobacteria	Enterobacterales	Aeromonadaceae	Aeromonas	Unassign	474	25553	2379399	64.16	5184	59.48	0	0
SGB1935	RS-C001_bin20.metabat2	Bacteria	Firmicutes_A	Clostridia	Clostridiales	Clostridiaceae	Clostridium	Unassign	689	21769	3337099	30.73	5024	75.67	8.15	0
SGB1936	RS-C001_bin21.metabat2	Bacteria	Actinobacteriota	Actinomycetia	Propionibacteriales	Nocardioidaceae	Nocardioides	Unassign	276	92862	4652702	71.08	25606	94.8	3.15	17
SGB1937	RS-C001_bin3.metabat2	Bacteria	Bacteroidota	Bacteroidia	Sphingobacteriales	Sphingobacteriaceae	Unassign	Unassign	104	250691	5977519	45.29	85646	100	1.69	0
SGB1938	RS-C001_bin31.metabat2	Bacteria	Bacteroidota	Bacteroidia	Chitinophagales	Chitinophagaceae	JAFDYH01	Unassign	653	14715	2845781	42.06	4489	58.73	0.25	0
SGB1939	RS-C001_bin32.metabat2	Bacteria	Actinobacteriota	Actinomycetia	Nanopelagicales	CAIYMF01	WLRQ01	Unassign	506	28828	2596821	71.72	5629	60.11	2.19	0
SGB1940	RS-C001_bin36.metabat2	Bacteria	Proteobacteria	Alphaproteobacteria	Sphingomonadales	Sphingomonadaceae	Novosphingobium	Unassign	69	277067	2960148	63.54	73025	97.68	0.68	10
SGB1941	RS-C001_bin38.metabat2	Bacteria	Proteobacteria	Gammaproteobacteria	Burkholderiales	Burkholderiaceae	Comamonas	Unassign	591	21365	2515095	68.6	4365	53.61	0	0
SGB1942	RS-C001_bin39.metabat2	Bacteria	Bacteroidota	Bacteroidia	Flavobacteriales	Weeksellaceae	Chryseobacterium	Unassign	229	143465	4655270	34.37	30081	98.91	0.49	5
SGB1943	RS-C001_bin46.metabat2	Bacteria	Acidobacteriota	Blastocatellia	Pyrinomonadales	Pyrinomonadaceae	PSRF01	Unassign	846	32482	5075226	54.12	6827	71.01	1.71	1
SGB1944	RS-C001_bin55.metabat2	Bacteria	Acidobacteriota	Blastocatellia	Pyrinomonadales	Pyrinomonadaceae	PSRF01	Unassign	170	193076	6410295	54.13	59468	97.38	5.98	51
SGB1945	RS-C001_bin7.metabat2	Bacteria	Proteobacteria	Gammaproteobacteria	Enterobacterales	Enterobacteriaceae	Leclercia	Unassign	364	49943	4391350	55.48	15876	63.79	1.72	7
SGB1946	RS-C001_bins30.concoct	Bacteria	Desulfobacterota_B	Binatia	UBA9968	UBA9968	DP-1	Unassign	1048	15113	3302174	54.39	3085	54.76	3.89	0
SGB1947	RS-C001_bins34.concoct	Bacteria	Actinobacteriota	Actinomycetia	Propionibacteriales	Propionibacteriaceae	Unassign	Unassign	712	10665	2298597	63.47	3176	54.19	1.3	0
SGB1948	RS-C001_bins58.concoct	Bacteria	Actinobacteriota	Thermoleophilia	Solirubrobacterales	1970-09-01	Unassign	Unassign	335	17115	1679510	68.45	5764	66.47	2.42	0
SGB1949	RS-C002.bins132.maxbin	Bacteria	Dependentiae	Babeliae	Babeliales	Vermiphilaceae	SOIL31	Unassign	55	78486	973907	37.16	32778	78.79	1.16	0
SGB1950	RS-C002.bins276.maxbin	Bacteria	Desulfobacterota_B	Binatia	UBA9968	UBA9968	DP-20	Unassign	966	18641	3833454	56.38	4289	70.56	8.08	0
SGB1951	RS-C002.bins326.maxbin	Bacteria	Bacteroidota	Bacteroidia	Flavobacteriales	Flavobacteriaceae	Flavobacterium	Flavobacterium sp001898245	649	18893	2771548	40.57	4660	54.31	1.72	0
SGB1952	RS-C002_bin108.metabat2	Bacteria	Gemmatimonadota	Gemmatimonadetes	Gemmatimonadales	GWC2-71-9	JACDDX01	Unassign	506	12141	2083912	69.91	4255	55.69	4.4	0
SGB1953	RS-C002_bin110.metabat2	Bacteria	Bacteroidota	Bacteroidia	Sphingobacteriales	Sphingobacteriaceae	Pedobacter	Pedobacter soli	209	158462	5779385	40.41	46193	95.5	2.07	6
SGB1954	RS-C002_bin124.metabat2	Bacteria	Actinobacteriota	Thermoleophilia	Solirubrobacterales	1970-09-01	WHSW01	Unassign	354	24577	1842994	69.91	5388	50.46	2.16	0
SGB1955	RS-C002_bin13.metabat2	Bacteria	Proteobacteria	Gammaproteobacteria	Burkholderiales	JAEUMW01	Unassign	Unassign	376	60996	3256471	63.28	12240	82.26	4.31	2
SGB1956	RS-C002_bin130.metabat2	Bacteria	Proteobacteria	Gammaproteobacteria	Enterobacterales	Enterobacteriaceae	Serratia_A	Unassign	446	52024	4419265	52.89	12291	53.61	1.72	4
SGB1957	RS-C002_bin14.metabat2	Bacteria	Nitrospirota	Nitrospiria	Nitrospirales	Nitrospiraceae	Nitrospira_C	Unassign	296	35519	2547328	58.19	10762	84.18	1.82	6
SGB1958	RS-C002_bin142.metabat2	Bacteria	Proteobacteria	Gammaproteobacteria	Burkholderiales	SG8-39	JAGVSZ01	Unassign	624	13539	2575569	69.33	4229	51.82	1.82	0
SGB1959	RS-C002_bin154.metabat2	Bacteria	Actinobacteriota	Actinomycetia	JACCUZ01	JACCUZ01	Unassign	Unassign	179	105517	3047794	72.98	27961	80.72	5.21	10
SGB1960	RS-C002_bin156.metabat2	Bacteria	Acidobacteriota	Blastocatellia	Pyrinomonadales	Pyrinomonadaceae	Unassign	Unassign	563	34237	3500383	59.75	6657	60.19	2.56	0
SGB1961	RS-C002_bin165.metabat2	Bacteria	Actinobacteriota	UBA4738	UBA4738	HRBIN12	AC-51	Unassign	132	133538	2646415	70.76	34841	96.82	6.27	0
SGB1962	RS-C002_bin175.metabat2	Bacteria	Proteobacteria	Gammaproteobacteria	Steroidobacterales	Steroidobacteraceae	CADEFQ01	Unassign	309	17743	1604617	68.83	5739	57.65	3.93	0
SGB1963	RS-C002_bin23.metabat2	Bacteria	Bacteroidota	Bacteroidia	Flavobacteriales	Weeksellaceae	Chryseobacterium	Unassign	325	130867	4849912	36.16	20618	86.59	2.08	4
SGB1964	RS-C002_bin40.metabat2	Bacteria	Bacteroidota	Bacteroidia	Chitinophagales	Chitinophagaceae	Unassign	Unassign	466	87114	5116970	40.16	14551	88.23	0.59	0
SGB1965	RS-C002_bin41.metabat2	Bacteria	Actinobacteriota	UBA4738	UBA4738	HRBIN12	AC-51	Unassign	100	75865	1636414	69.59	29694	55.78	1.03	0
SGB1966	RS-C002_bin65.metabat2	Bacteria	Verrucomicrobiota	Verrucomicrobiae	Chthoniobacterales	UBA10450	Palsa-1392	Unassign	349	15019	1677672	57.41	4934	58.2	4.14	0
SGB1967	RS-C002_bin68.metabat2	Bacteria	Cyanobacteria	Vampirovibrionia	Vampirovibrionales	Vampirovibrionaceae	Unassign	Unassign	75	137651	2918589	54.7	51887	93.94	0.85	1
SGB1968	RS-C002_bin81.metabat2	Bacteria	Actinobacteriota	Thermoleophilia	Solirubrobacterales	1970-09-01	VAYN01	Unassign	299	49661	2613343	68.6	11309	89.12	8.05	45
SGB1969	RS-C002_bins38.concoct	Bacteria	Proteobacteria	Gammaproteobacteria	Pseudomonadales	HTCC2089	SZUA-521	Unassign	531	25764	2963288	62.23	6311	68.95	2.3	0
SGB1970	RS-C002_bins47.concoct	Bacteria	Desulfobacterota_B	Binatia	JACPRU01	JACPRU01	JACPRU01	Unassign	622	14237	2523716	65.57	4398	56.2	2.38	0
SGB1971	RS-C002_bins84.concoct	Bacteria	Planctomycetota	Planctomycetia	Gemmatales	Gemmataceae	Unassign	Unassign	432	74309	7247510	56.36	22514	93.02	2.33	0
SGB1972	RS-C002_bins99.concoct	Bacteria	Acidobacteriota	Vicinamibacteria	Vicinamibacterales	UBA2999	Gp6-AA40	Unassign	693	42748	5410940	62.71	9077	51.65	1.72	12
SGB1973	RS-C003_bins2.concoct	Bacteria	Actinobacteriota	Acidimicrobiia	IMCC26256	PALSA-555	Unassign	Unassign	496	9243	1588947	70.5	3233	62.26	1.07	0
SGB1974	RS-C004.bins031.maxbin	Bacteria	Firmicutes	Bacilli	Bacillales_B	DSM-18226	Unassign	Unassign	38	77906	643480	39.33	29168	60.34	4.83	0
SGB1975	RS-C004_bin38.metabat2	Bacteria	Proteobacteria	Gammaproteobacteria	Pseudomonadales	Moraxellaceae	Acinetobacter	Acinetobacter bereziniae_A	730	38341	4943247	37.45	8376	55.52	4.31	1
SGB1976	RS-C004_bin4.metabat2	Bacteria	Proteobacteria	Gammaproteobacteria	Burkholderiales	Burkholderiaceae	Comamonas	Comamonas terrigena	551	19511	2930644	66.12	5798	68.53	0.59	0
SGB1977	RS-C004_bin42.metabat2	Bacteria	Proteobacteria	Alphaproteobacteria	Caulobacterales	Caulobacteraceae	Phenylobacterium	Unassign	396	54495	3560231	69.29	11539	89.34	2.91	0
SGB1978	RS-C004_bins13.concoct	Bacteria	Bacteroidota	Bacteroidia	Flavobacteriales	Flavobacteriaceae	Flavobacterium	Unassign	143	200515	5435927	33.42	60149	98.4	0.23	4
SGB1979	RS-C004_bins23.concoct	Bacteria	Proteobacteria	Alphaproteobacteria	Sphingomonadales	Sphingomonadaceae	Sphingomonas	Sphingomonas pseudosanguinis	171	156662	3280349	67.06	25531	93.03	0.32	0
SGB1980	RS-C004_bins33.concoct	Bacteria	Actinobacteriota	Actinomycetia	Mycobacteriales	Mycobacteriaceae	Mycobacterium	Unassign	639	93273	6077712	64.98	12109	73.72	3.18	41
SGB1981	RS-C004_bins9.concoct	Bacteria	Proteobacteria	Alphaproteobacteria	Sphingomonadales	Sphingomonadaceae	Sphingopyxis	Unassign	253	79103	3433006	65.44	20430	95.33	1.29	0
SGB1982	RS-C005.bins017.maxbin	Bacteria	Firmicutes	Bacilli	Lactobacillales	Enterococcaceae	Enterococcus_B	Enterococcus_B pernyi	91	174516	2868420	38.56	57742	96.55	5.17	0
SGB1983	RS-C005_bin21.metabat2	Bacteria	Proteobacteria	Gammaproteobacteria	Enterobacterales	Enterobacteriaceae	Pantoea	Unassign	385	60263	4524947	55.03	15622	59.64	3.45	20
SGB1984	RS-C005_bins0.concoct	Bacteria	Firmicutes	Bacilli	Bacillales_B	DSM-18226	Neobacillus	Neobacillus sp000686805	1000	63563	3538458	38.58	3583	57.93	3.33	0
SGB1985	RS-C005_bins46.concoct	Bacteria	Proteobacteria	Gammaproteobacteria	Pseudomonadales	Pseudomonadaceae	Pseudomonas_E	Pseudomonas_E sp002113025	531	46829	4991988	60.4	11818	88.01	2.48	16
SGB1986	RS-C006.bins034.maxbin	Bacteria	Proteobacteria	Gammaproteobacteria	Pseudomonadales	Moraxellaceae	Acinetobacter	Acinetobacter lwoffii_D	545	173473	4117431	45.37	16576	75.45	7.05	6
SGB1987	RS-C006_bin1.metabat2	Bacteria	Proteobacteria	Gammaproteobacteria	Burkholderiales	Burkholderiaceae	Comamonas	Comamonas testosteroni_B	641	26907	3928734	62.9	6892	81.2	0.6	3
SGB1988	RS-C006_bin19.metabat2	Bacteria	Proteobacteria	Alphaproteobacteria	Rhizobiales	Hyphomicrobiaceae	AWTP1-13	Unassign	836	10923	3198505	63.98	3817	50.49	1.81	0
SGB1989	RS-C006_bin20.metabat2	Bacteria	Proteobacteria	Gammaproteobacteria	Pseudomonadales	Pseudomonadaceae	Pseudomonas_E	Unassign	611	83386	6324498	61.6	14253	53.79	0	63
SGB1990	RS-C006_bin33.metabat2	Bacteria	Proteobacteria	Alphaproteobacteria	Rhizobiales	Rhizobiaceae	Ensifer	Ensifer adhaerens	690	65917	5383102	62.61	9835	68.96	4.65	0
SGB1991	RS-C006_bin35.metabat2	Bacteria	Proteobacteria	Alphaproteobacteria	Caulobacterales	Caulobacteraceae	Phenylobacterium	Unassign	535	62885	4658457	69.07	11527	89.1	2.86	0
SGB1992	RS-C006_bin42.metabat2	Bacteria	Proteobacteria	Gammaproteobacteria	Enterobacterales	Aeromonadaceae	Aeromonas	Unassign	413	54251	4059082	61.35	12204	84.31	0.19	4
SGB1993	RS-C006_bin49.metabat2	Bacteria	Proteobacteria	Alphaproteobacteria	Rhizobiales	Rhizobiaceae	Shinella	Unassign	289	129464	5070808	63.73	27495	81.03	4.31	2
SGB1994	RS-C006_bin51.metabat2	Bacteria	Bacteroidota	Bacteroidia	Flavobacteriales	Weeksellaceae	Chryseobacterium	Unassign	108	153701	4344788	33.41	67636	100	0	9
SGB1995	RS-C006_bins10.concoct	Bacteria	Bacteroidota	Bacteroidia	Flavobacteriales	Flavobacteriaceae	Flavobacterium	Unassign	974	16912	3975001	33.65	4327	58.97	4.61	0
SGB1996	RS-C006_bins17.concoct	Bacteria	Actinobacteriota	Actinomycetia	Propionibacteriales	Propionibacteriaceae	Unassign	Unassign	721	10973	2291744	62.47	3183	57.56	2.78	0
SGB1997	RS-C006_bins61.concoct	Bacteria	Proteobacteria	Alphaproteobacteria	Sphingomonadales	Sphingomonadaceae	Sphingopyxis	Unassign	204	117576	3915322	65.16	28184	97.9	1.56	4
SGB1998	RS-C006_bins7.concoct	Bacteria	Bacteroidota	Bacteroidia	Flavobacteriales	Weeksellaceae	Chishuiella	Unassign	527	49470	2972554	29.83	6848	90.32	2.34	0
[truncated: 6,801 more rows]

## Sheet: Table S5B
BGC ID	Accession ID	Description	Product Prediction	BiG-SCAPE class	Organism	Taxonomy
BGC0000001	BGC0000001	Verrucosispora maris AB-18-032 protein methyltransferase (orfP), putative hydrolase, pathway-specific SARP activator (abyR), cytochrome P450 (abyX), LuxR family transcriptional regulator (abyH), pathway-specific SARP activator (abyI), YD repeat protein (abyK), 3-oxoacyl-ACP synthase III (abyA1), phosphatase and glyceryl transferase (abyA2), acyl-carrier protein (abyA3), pyruvate/2-oxoglutarate de…	T1PKS	PKSI	Micromonospora maris AB-18-032	Bacteria,Actinobacteria,Micromonosporales,Micromonosporaceae,Micromonospora
BGC0000002	BGC0000002	Kutzneria albida DSM 43870, complete genome	oligosaccharide.T1PKS	Others	Kutzneria albida DSM 43870	Bacteria,Actinobacteria,Pseudonocardiales,Pseudonocardiaceae,Kutzneria
BGC0000003	BGC0000003	Alternaria alternata AF-toxin biosynthesis gene cluster (Aft9-1, Aft10-1, Aft11-1, Aft12-1, AftR-2, Aft3-2), complete cds	T1PKS	PKSI	Alternaria alternata	Eukaryota,Fungi,Dikarya,Ascomycota,Pezizomycotina,Dothideomycetes,Pleosporomycetidae,Pleosporales,Pleosporineae,Pleosporaceae,Alternaria,Alternaria sect. Alternaria,Alternaria alternata complex
BGC0000004	BGC0000004	Aspergillus oryzae DNA, aflatoxin biosynthesis gene cluster, complete sequence, strain: RIB40	T1PKS	PKSI	Aspergillus oryzae	Eukaryota,Fungi,Dikarya,Ascomycota,Pezizomycotina,Eurotiomycetes,Eurotiomycetidae,Eurotiales,Aspergillaceae,Aspergillus,Aspergillus subgen. Circumdati
BGC0000006	BGC0000006	Aspergillus flavus isolate AF13 aflatoxin biosynthesis gene cluster, complete sequence	T1PKS	PKSI	Aspergillus flavus	Eukaryota,Fungi,Dikarya,Ascomycota,Pezizomycotina,Eurotiomycetes,Eurotiomycetidae,Eurotiales,Aspergillaceae,Aspergillus,Aspergillus subgen. Circumdati
BGC0000007	BGC0000007	Aspergillus flavus isolate BN008 aflatoxin biosynthesis gene cluster, complete sequence	T1PKS	PKSI	Aspergillus flavus	Eukaryota,Fungi,Dikarya,Ascomycota,Pezizomycotina,Eurotiomycetes,Eurotiomycetidae,Eurotiales,Aspergillaceae,Aspergillus,Aspergillus subgen. Circumdati
BGC0000008	BGC0000008	Aspergillus flavus isolate AF70 aflatoxin biosynthesis gene cluster, complete sequence	T1PKS	PKSI	Aspergillus flavus	Eukaryota,Fungi,Dikarya,Ascomycota,Pezizomycotina,Eurotiomycetes,Eurotiomycetidae,Eurotiales,Aspergillaceae,Aspergillus,Aspergillus subgen. Circumdati
BGC0000009	BGC0000009	Aspergillus nomius isolate AN13137 aflatoxin biosynthesis gene cluster, complete sequence	T1PKS	PKSI	Aspergillus nomiae	Eukaryota,Fungi,Dikarya,Ascomycota,Pezizomycotina,Eurotiomycetes,Eurotiomycetidae,Eurotiales,Aspergillaceae,Aspergillus
BGC0000010	BGC0000010	Aspergillus flavus isolate AF36 aflatoxin biosynthesis gene cluster, complete sequence		Others	Aspergillus flavus	Eukaryota,Fungi,Dikarya,Ascomycota,Pezizomycotina,Eurotiomycetes,Eurotiomycetidae,Eurotiales,Aspergillaceae,Aspergillus,Aspergillus subgen. Circumdati
BGC0000011	BGC0000011	Aspergillus ochraceoroseus strain SRRC 1432 aflatoxin/sterigmatocystin gene cluster, complete sequence	T1PKS	PKSI	Aspergillus ochraceoroseus	Eukaryota,Fungi,Dikarya,Ascomycota,Pezizomycotina,Eurotiomycetes,Eurotiomycetidae,Eurotiales,Aspergillaceae,Aspergillus,Aspergillus subgen. Nidulantes
BGC0000012	BGC0000012	Alternaria solani alt1, alt2, alt3, alt4, alt5 genes for cytochrome P-450, cytochrome, P-450, cytochrome P-450, FAD/FMN-dependent oxygenase/oxidase, polyketide synthase, complete cds	T1PKS	PKSI	Alternaria solani	Eukaryota,Fungi,Dikarya,Ascomycota,Pezizomycotina,Dothideomycetes,Pleosporomycetidae,Pleosporales,Pleosporineae,Pleosporaceae,Alternaria,Alternaria sect. Porri
BGC0000013	BGC0000013	TPA_asm: Aspergillus nidulans FGSC A4 chromosome IV	T1PKS	PKSI	Aspergillus nidulans FGSC A4	Eukaryota,Fungi,Dikarya,Ascomycota,Pezizomycotina,Eurotiomycetes,Eurotiomycetidae,Eurotiales,Aspergillaceae,Aspergillus,Aspergillus subgen. Nidulantes
BGC0000014	BGC0000014	Polyangium cellulosum strain So ce10 histidine kinase response regulator gene, partial cds; hypothetical protein genes, complete cds; ambruticin gene cluster, complete sequence; and hypothetical protein genes, complete cds	NRPS-like.T1PKS	PKS-NRP_Hybrids	Sorangium cellulosum	Bacteria,Proteobacteria,Deltaproteobacteria,Myxococcales,Sorangiineae,Polyangiaceae,Sorangium
BGC0000016	BGC0000016	Streptomyces nodosus amphotericin biosynthetic gene cluster, partial sequence		Others	Streptomyces nodosus	Bacteria,Actinobacteria,Streptomycetales,Streptomycetaceae,Streptomyces
BGC0000017	BGC0000017	Oscillatoria sp. PCC 6506 anatoxin-a and homoanatoxin-a biosynthetic gene cluster, complete sequence	T1PKS	PKSI	[Oscillatoria] sp. PCC 6506	Bacteria,Cyanobacteria,Oscillatoriophycideae,Oscillatoriales,Kamptonema
BGC0000018	BGC0000018	Streptomyces eurythermus strain ATCC 23956 anglomycin biosynthesis gene cluster, complete sequence	T1PKS	PKSI	Streptomyces eurythermus	Bacteria,Actinobacteria,Streptomycetales,Streptomycetaceae,Streptomyces
BGC0000019	BGC0000019	Streptomyces eurythermus angolamycin biosynthesis gene cluster, complete sequence		Others	Streptomyces eurythermus	Bacteria,Actinobacteria,Streptomycetales,Streptomycetaceae,Streptomyces
BGC0000020	BGC0000020	Actinosynnema pretiosum subsp. auranticum maytansinoid antitumor agent ansamitocin biosynthetic gene cluster I, partial sequence	NRPS-like.T1PKS	PKS-NRP_Hybrids	Actinosynnema pretiosum subsp. auranticum	Bacteria,Actinobacteria,Pseudonocardiales,Pseudonocardiaceae,Actinosynnema
BGC0000021	BGC0000021	Nocardiopsis sp. FU40 apoptolidin gene cluster, complete sequence	T1PKS	PKSI	Amycolatopsis sp. FU40	Bacteria,Actinobacteria,Pseudonocardiales,Pseudonocardiaceae,Amycolatopsis,unclassified Amycolatopsis
BGC0000022	BGC0000022	Aspergillus nidulans FGSC A4 chromosome VIII ANcontig1.15, whole genome shotgun sequence	T1PKS	PKSI	Aspergillus nidulans FGSC A4	Eukaryota,Fungi,Dikarya,Ascomycota,Pezizomycotina,Eurotiomycetes,Eurotiomycetidae,Eurotiales,Aspergillaceae,Aspergillus,Aspergillus subgen. Nidulantes
BGC0000023	BGC0000023	Stigmatella aurantiaca aurafuron biosynthetic gene cluster, strain DW4/3-1	T1PKS	PKSI	Stigmatella aurantiaca DW4/3-1	Bacteria,Proteobacteria,Deltaproteobacteria,Myxococcales,Cystobacterineae,Archangiaceae,Stigmatella
BGC0000024	BGC0000024	Streptomyces thioluteus aureothin biosynthesis gene cluster (aurABCDEFGHI genes), strain HKI-22	T1PKS	PKSI	Streptomyces thioluteus	Bacteria,Actinobacteria,Streptomycetales,Streptomycetaceae,Streptomyces
BGC0000025	BGC0000025	Streptomyces avermitilis avermectin biosynthetic gene cluster (orf1, aveBI, aveBII, aveBIII, aveBIV, aveBV, aveBVI, aveBVII, aveBVIII), complete cds		Others	Streptomyces avermitilis	Bacteria,Actinobacteria,Streptomycetales,Streptomycetaceae,Streptomyces
BGC0000026	BGC0000026	Streptomyces viridochromogenes Tue57 Avilamycin A biosynthetic gene cluster, complete sequence	PKS-like.oligosaccharide.T1PKS	Others	Streptomyces viridochromogenes Tue57	Bacteria,Actinobacteria,Streptomycetales,Streptomycetaceae,Streptomyces
BGC0000027	BGC0000027	Monascus pilosus pigment biosynthetic gene cluster, complete sequence	T1PKS	PKSI	Monascus pilosus	Eukaryota,Fungi,Dikarya,Ascomycota,Pezizomycotina,Eurotiomycetes,Eurotiomycetidae,Eurotiales,Aspergillaceae,Monascus
BGC0000028	BGC0000028	Streptomyces lohii strain ATCC BAA-1276 bafilomycin biosynthetic gene cluster, complete sequence; and putative LuxR-like protein, putative malonyl transferase, and putative CoA ligase genes, complete cds	T1PKS	PKSI	Streptomyces lohii	Bacteria,Actinobacteria,Streptomycetales,Streptomycetaceae,Streptomyces
BGC0000029	BGC0000029	Streptomyces sp. DSM 21069 putative secreted metal-binding protein, putative lipoprotein, and hypothetical protein genes, complete cds; BE-14106 biosynthetic gene cluster, complete sequence; putative tripeptidylaminopeptidase and putative urease accessory proteins genes, complete cds; and putative urease accessory protein gene, partial cds	T1PKS	PKSI	Streptomyces sp. DSM 21069	Bacteria,Actinobacteria,Streptomycetales,Streptomycetaceae,Streptomyces
BGC0000030	BGC0000030	Fusarium fujikuroi IMI 58289 draft genome, chromosome FFUJ_chr05	T1PKS	PKSI	Fusarium fujikuroi IMI 58289	Eukaryota,Fungi,Dikarya,Ascomycota,Pezizomycotina,Sordariomycetes,Hypocreomycetidae,Hypocreales,Nectriaceae,Fusarium,Fusarium fujikuroi species complex
BGC0000031	BGC0000031	Streptomyces parvulus Tu4055 cluster for borrelidin biosynthesis	T1PKS	PKSI	Streptomyces parvulus	Bacteria,Actinobacteria,Streptomycetales,Streptomycetaceae,Streptomyces
BGC0000032	BGC0000032	Streptomyces chartreusis pyrrole polyether antibiotic calcimycin (A23187) biosynthesis gene cluster, complete sequence	T1PKS	PKSI	Streptomyces chartreusis NRRL 3882	Bacteria,Actinobacteria,Streptomycetales,Streptomycetaceae,Streptomyces
BGC0000033	BGC0000033	Micromonospora echinospora calicheamicin biosynthetic locus, complete sequence	PKS-like.oligosaccharide.T1PKS	Others	Micromonospora echinospora	Bacteria,Actinobacteria,Micromonosporales,Micromonosporaceae,Micromonospora
BGC0000034	BGC0000034	Streptomyces sp. FR-008 heptaene macrolide complex synthesis gene cluster, complete sequence	NRPS-like.T1PKS	PKS-NRP_Hybrids	Streptomyces sp. FR-008	Bacteria,Actinobacteria,Streptomycetales,Streptomycetaceae,Streptomyces
BGC0000035	BGC0000035	Streptomyces bikiniensis strain NRRL 2737 chalcomycin biosynthetic gene cluster, partial sequence	T1PKS	PKSI	Streptomyces bikiniensis	Bacteria,Actinobacteria,Streptomycetales,Streptomycetaceae,Streptomyces
BGC0000036	BGC0000036	Streptomyces antibioticus acetyltransferase gene, partial cds; hypothetical protein and Orf0 genes, complete cds; chlorothricin biosynthetic gene cluster, complete sequence; ChlC7, ChlB1, ChlB4, ChlB2, ChlB3, ChlH, ChlC5, ChlC4, ChlC3, ChlI, ChlJ, ChlF2, ChlK, ChlC2, ChlC1, ChlC6, ChlL, peptidase M20, putative helicase, and ankyrin genes, complete cds; tankyrase1-binding protein gene, partial cds…	PKS-like.T1PKS	PKSother	Streptomyces antibioticus	Bacteria,Actinobacteria,Streptomycetales,Streptomycetaceae,Streptomyces
BGC0000037	BGC0000037	TPA_asm: Aspergillus nidulans FGSC A4 chromosome I	T1PKS	PKSI	Aspergillus nidulans FGSC A4	Eukaryota,Fungi,Dikarya,Ascomycota,Pezizomycotina,Eurotiomycetes,Eurotiomycetidae,Eurotiales,Aspergillaceae,Aspergillus,Aspergillus subgen. Nidulantes
BGC0000038	BGC0000038	Streptomyces coelicolor A3(2) complete genome	butyrolactone.T1PKS	Others	Streptomyces coelicolor A3(2)	Bacteria,Actinobacteria,Streptomycetales,Streptomycetaceae,Streptomyces,Streptomyces albidoflavus group
BGC0000039	BGC0000039	Penicillium citrinum ML-236B (compactin) biosynthetic gene cluster (mlcH, mlcG, mlcF, mlcA, mlcC, mlcB, mlcD, mlcE, mlcR), complete cds	T1PKS	PKSI	Penicillium citrinum	Eukaryota,Fungi,Dikarya,Ascomycota,Pezizomycotina,Eurotiomycetes,Eurotiomycetidae,Eurotiales,Aspergillaceae,Penicillium
BGC0000040	BGC0000040	Streptomyces neyagawaensis concanamycin A biosynthetic gene cluster, complete sequence	T1PKS	PKSI	Streptomyces neyagawaensis	Bacteria,Actinobacteria,Streptomycetales,Streptomycetaceae,Streptomyces
BGC0000041	BGC0000041	Pseudomonas syringae coronafacic acid biosynthetic gene cluster, complete sequence	T1PKS	PKSI	Pseudomonas syringae	Bacteria,Proteobacteria,Gammaproteobacteria,Pseudomonadales,Pseudomonadaceae,Pseudomonas
BGC0000042	BGC0000042	Streptomyces sp. MJ635-86F5 DNA, cremimycin biosynthetic gene cluster, complete sequence	T1PKS	PKSI	Streptomyces sp. MJ635-86F5	Bacteria,Actinobacteria,Streptomycetales,Streptomycetaceae,Streptomyces
BGC0000043	BGC0000043	Moorea producens 19L curacin A biosynthetic gene cluster, partial sequence	T1PKS	PKSI	Moorena producens 19L	Bacteria,Cyanobacteria,Oscillatoriophycideae,Oscillatoriales,Oscillatoriaceae,Moorena
BGC0000044	BGC0000044	Stigmatella aurantiaca DW4/3-1, complete genome	T1PKS	PKSI	Stigmatella aurantiaca DW4/3-1	Bacteria,Proteobacteria,Deltaproteobacteria,Myxococcales,Cystobacterineae,Archangiaceae,Stigmatella
BGC0000045	BGC0000045	Aspergillus terreus strain AH-02-30-F7 dehydrocurvularin biosynthetic gene cluster, complete sequence	T1PKS	PKSI	Aspergillus terreus	Eukaryota,Fungi,Dikarya,Ascomycota,Pezizomycotina,Eurotiomycetes,Eurotiomycetidae,Eurotiales,Aspergillaceae,Aspergillus,Aspergillus subgen. Circumdati
BGC0000046	BGC0000046	Alternaria brassicicola strain MUCL 202097 depudecin gene cluster, complete sequence	T1PKS	PKSI	Alternaria brassicicola	Eukaryota,Fungi,Dikarya,Ascomycota,Pezizomycotina,Dothideomycetes,Pleosporomycetidae,Pleosporales,Pleosporineae,Pleosporaceae,Alternaria,Alternaria sect. Brassicicola
BGC0000047	BGC0000047	Streptomyces sp. KCTC 0041BP dihydrochalcomyin biosynthesis gene cluster, complete sequence	T1PKS	PKSI	Streptomyces sp. KCTC 0041BP	Bacteria,Actinobacteria,Streptomycetales,Streptomycetaceae,Streptomyces
BGC0000048	BGC0000048	Mycosphaerella pini hypothetical protein (DS34) gene, partial cds; hypothetical protein (DS33), putative methionine permease (DS32), putative translation elongation factor (DS31), hypothetical protein (DS30), hypothetical protein (DS29), putative MFS multidrug transporter (DS28), hypothetical protein (DS27), hypothetical protein (DS26), putative amino acid permease (DS25), putative flavin-binding…	T1PKS	PKSI	Dothistroma septosporum	Eukaryota,Fungi,Dikarya,Ascomycota,Pezizomycotina,Dothideomycetes,Dothideomycetidae,Mycosphaerellales,Mycosphaerellaceae,Dothistroma
BGC0000050	BGC0000050	Streptomyces aculeolatus A gene locus, complete sequence	T1PKS	PKSI	Streptomyces aculeolatus	Bacteria,Actinobacteria,Streptomycetales,Streptomycetaceae,Streptomyces
BGC0000051	BGC0000051	UNVERIFIED: Streptomyces aburaviensis ebelactone gene cluster, complete sequence	T1PKS	PKSI	Kitasatospora aburaviensis	Bacteria,Actinobacteria,Streptomycetales,Streptomycetaceae,Kitasatospora
BGC0000052	BGC0000052	Streptomyces aizunensis strain NRRL B-11277 glycosyltransferase, polyketide synthase type Is, acyl transferase, membrane protein, ABC transporter, sugar dehydratase/epimerase, sugar epimerase, sugar nucleotidyltransferase, sugar dehydratase/epimerase, thioesterase, acyl CoA ligase, amine oxidase, phosphopantetheinyl transferase, transcriptional regulator, carboxylase/carboxyltransferase, amidinoh…	T1PKS	PKSI	Streptomyces aizunensis	Bacteria,Actinobacteria,Streptomycetales,Streptomycetaceae,Streptomyces
BGC0000053	BGC0000053	Sequence 49 from patent US 7595187	T1PKS	PKSI	Unknown. Unclassified.
BGC0000054	BGC0000054	Aeromicrobium erythreum putative transcriptional repressor and putative dehydrogenase/reductase genes, complete cds; erythromycin biosynthesis gene cluster, complete sequence; putative oxidoreductase and LipN genes, complete cds; monoamine oxidase gene, partial cds; and unknown gene	T1PKS	PKSI	Aeromicrobium erythreum	Bacteria,Actinobacteria,Propionibacteriales,Nocardioidaceae,Aeromicrobium
BGC0000055	BGC0000055	Saccharopolyspora erythraea NRRL2338 complete genome	T1PKS	PKSI	Saccharopolyspora erythraea NRRL 2338	Bacteria,Actinobacteria,Pseudonocardiales,Pseudonocardiaceae,Saccharopolyspora
BGC0000056	BGC0000056	Actinomadura verrucosospora strain ATCC 39334 esperamicin enediyne iterative type I polyketide synthase gene locus, partial sequence	T1PKS	PKSI	Actinomadura verrucosospora	Bacteria,Actinobacteria,Streptosporangiales,Thermomonosporaceae,Actinomadura
BGC0000057	BGC0000057	Aspergillus nidulans FGSC A4 chromosome II ANcontig1.135, whole genome shotgun sequence	T1PKS	PKSI	Aspergillus nidulans FGSC A4	Eukaryota,Fungi,Dikarya,Ascomycota,Pezizomycotina,Eurotiomycetes,Eurotiomycetidae,Eurotiales,Aspergillaceae,Aspergillus,Aspergillus subgen. Nidulantes
BGC0000058	BGC0000058	Streptomyces graminofaciens DNA, FD-891 producer gene cluster	T1PKS	PKSI	Streptomyces graminofaciens	Bacteria,Actinobacteria,Streptomycetales,Streptomycetaceae,Streptomyces
BGC0000059	BGC0000059	Streptomyces avermitilis MA-4680 = NBRC 14893 DNA, complete genome	T1PKS	PKSI	Streptomyces avermitilis MA-4680 = NBRC 14893	Bacteria,Actinobacteria,Streptomycetales,Streptomycetaceae,Streptomyces
BGC0000060	BGC0000060	Streptomyces pulveraceus strain ATCC 31906 fostriecin biosynthetic gene cluster, complete sequence	T1PKS	PKSI	Streptomyces pulveraceus	Bacteria,Actinobacteria,Streptomycetales,Streptomycetaceae,Streptomyces
BGC0000062	BGC0000062	Gibberella moniliformis fumonisin biosynthetic gene cluster, complete sequence	T1PKS	PKSI	[Gibberella] fujikuroi var. moniliformis	Eukaryota,Fungi,Dikarya,Ascomycota,Pezizomycotina,Sordariomycetes,Hypocreomycetidae,Hypocreales,Nectriaceae,Fusarium,Fusarium fujikuroi species complex
BGC0000063	BGC0000063	Fusarium oxysporum strain FRC O-1890 fumonisin biosynthetic gene cluster, complete sequence	T1PKS	PKSI	Fusarium oxysporum	Eukaryota,Fungi,Dikarya,Ascomycota,Pezizomycotina,Sordariomycetes,Hypocreomycetidae,Hypocreales,Nectriaceae,Fusarium,Fusarium oxysporum species complex
BGC0000064	BGC0000064	Gibberella fujikuroi FUSS (fusA) gene, complete cds	NRPS.T1PKS	PKS-NRP_Hybrids	Fusarium verticillioides	Eukaryota,Fungi,Dikarya,Ascomycota,Pezizomycotina,Sordariomycetes,Hypocreomycetidae,Hypocreales,Nectriaceae,Fusarium,Fusarium fujikuroi species complex
BGC0000065	BGC0000065	Streptomyces galbus strain KCCM 41354 transcriptional regulator, dehydrogenase, oxidoreductase, hydrolase, DNA binding protein, and O-methyltransferase genes, complete cds; methoxymalonyl-ACP biosynthesis gene locus, complete sequence; monooxygenase, beta-ketoacyl synthases, acyltransferase, oxidoreductase, transcriptional regulator, dehydratase, transport protein, dehydratase, transcriptional re…	PKS-like	PKSother	Streptomyces galbus	Bacteria,Actinobacteria,Streptomycetales,Streptomycetaceae,Streptomyces
BGC0000066	BGC0000066	Streptomyces hygroscopicus strain NRRL 3602 geldanamycin biosynthesis gene cluster, partial sequence	NRPS-like.T1PKS	PKS-NRP_Hybrids	Streptomyces hygroscopicus	Bacteria,Actinobacteria,Streptomycetales,Streptomycetaceae,Streptomyces,Streptomyces violaceusniger group
BGC0000067	BGC0000067	Streptomyces hygroscopicus subsp. duamyceticus strain JCM4427 geldanamycin biosynthesis gene cluster, partial sequence	NRPS-like.T1PKS	PKS-NRP_Hybrids	Streptomyces hygroscopicus subsp. duamyceticus	Bacteria,Actinobacteria,Streptomycetales,Streptomycetaceae,Streptomyces,Streptomyces violaceusniger group
BGC0000068	BGC0000068	Streptomyces hygroscopicus strain 17997 geldanamycin biosynthesis gene cluster, partial sequence	T1PKS	PKSI	Streptomyces hygroscopicus	Bacteria,Actinobacteria,Streptomycetales,Streptomycetaceae,Streptomyces,Streptomyces violaceusniger group
BGC0000069	BGC0000069	Cystobacter violaceus strain Cb vi76 gephyronic acid biosynthetic gene cluster, complete sequence	T1PKS	PKSI	Archangium violaceum Cb vi76	Bacteria,Proteobacteria,Deltaproteobacteria,Myxococcales,Cystobacterineae,Archangiaceae,Archangium
BGC0000070	BGC0000070	Penicillium aethiopicum strain IBT 5753 griseofulvin biosynthetic gene cluster, complete sequence; and unknown genes	T1PKS	PKSI	Penicillium aethiopicum	Eukaryota,Fungi,Dikarya,Ascomycota,Pezizomycotina,Eurotiomycetes,Eurotiomycetidae,Eurotiales,Aspergillaceae,Penicillium
BGC0000072	BGC0000072	Pyxidicoccus fallax strain DSM 28991 gulmirecin biosynthesis gene cluster, complete sequence	T1PKS	PKSI	Pyxidicoccus fallax	Bacteria,Proteobacteria,Deltaproteobacteria,Myxococcales,Cystobacterineae,Myxococcaceae,Pyxidicoccus
BGC0000073	BGC0000073	Streptomyces halstedii halstoctacosanolide biosynthetic gene cluster (hlsA, hlsB, hlsC, hlsD, hlsE, hlsF, hlsG, hlsH, hlsI), complete cds	T1PKS	PKSI	Streptomyces halstedii	Bacteria,Actinobacteria,Streptomycetales,Streptomycetaceae,Streptomyces
BGC0000074	BGC0000074	Streptomyces hygroscopicus strain AM 3672 herbimycin polyketide biosynthetic gene cluster, complete sequence	NRPS-like.T1PKS	PKS-NRP_Hybrids	Streptomyces hygroscopicus	Bacteria,Actinobacteria,Streptomycetales,Streptomycetaceae,Streptomyces,Streptomyces violaceusniger group
BGC0000075	BGC0000075	Streptomyces sp. LZ35 hygrocin biosynthetic gene cluster, complete sequence	NRPS-like.T1PKS	PKS-NRP_Hybrids	Streptomyces sp. LZ35	Bacteria,Actinobacteria,Streptomycetales,Streptomycetaceae,Streptomyces
BGC0000076	BGC0000076	Hypomyces subiculosus strain DSM11931 hypothemycin gene cluster, partial sequence	T1PKS	PKSI	Hypomyces subiculosus	Eukaryota,Fungi,Dikarya,Ascomycota,Pezizomycotina,Sordariomycetes,Hypocreomycetidae,Hypocreales,Hypocreaceae,Hypomyces
BGC0000077	BGC0000077	Hypomyces subiculosus strain DSM11932 hypothemycin gene cluster, complete sequence; and oxidoreductase gene, complete cds	T1PKS	PKSI	Hypomyces subiculosus	Eukaryota,Fungi,Dikarya,Ascomycota,Pezizomycotina,Sordariomycetes,Hypocreomycetidae,Hypocreales,Hypocreaceae,Hypomyces
BGC0000078	BGC0000078	Streptomyces sp. ML694-90F3 DNA, incednine biosynthetic gene cluster	oligosaccharide.T1PKS	Others	Streptomyces sp. ML694-90F3	Bacteria,Actinobacteria,Streptomycetales,Streptomycetaceae,Streptomyces
BGC0000079	BGC0000079	Streptomyces antibioticus strain NRRL8167 indanomycin biosynthetic gene cluster, complete sequence	T1PKS	PKSI	Streptomyces antibioticus	Bacteria,Actinobacteria,Streptomycetales,Streptomycetaceae,Streptomyces
BGC0000080	BGC0000080	Polyangium cellulosum strain So ce307 conserved hypothetical protein gene, partial cds; and jerangolid gene cluster, partial sequence	T1PKS	PKSI	Sorangium cellulosum	Bacteria,Proteobacteria,Deltaproteobacteria,Myxococcales,Sorangiineae,Polyangiaceae,Sorangium
BGC0000081	BGC0000081	Streptoalloteichus sp. ATCC 53650 kedarcidin biosynthetic gene cluster, complete sequence	NRPS.arylpolyene.NRPS-like.T1PKS	Others	Streptoalloteichus sp. ATCC 53650	Bacteria,Actinobacteria,Pseudonocardiales,Pseudonocardiaceae,Streptoalloteichus,unclassified Streptoalloteichus
BGC0000082	BGC0000082	Actinomadura kijaniata fructokinase gene, partial cds; kijanimicin gene cluster, complete sequence; and D-ala, D-ala carboxypeptidase, conserved hypothetical protein, permease, and selenium binding protein genes, complete cds	oligosaccharide.T1PKS	Others	Actinomadura kijaniata	Bacteria,Actinobacteria,Streptosporangiales,Thermomonosporaceae,Actinomadura
BGC0000083	BGC0000083	Streptomyces amphibiosporus strain ATCC 53964 lactimidomycin gene cluster, complete sequence	transAT-PKS	PKSother	Streptomyces amphibiosporus	Bacteria,Actinobacteria,Streptomycetales,Streptomycetaceae,Streptomyces
BGC0000084	BGC0000084	Streptomyces sp. CS684 hypothetical protein, putative cytochrome c oxidase, putative histidine kinase sensor, and putative magnesium/manganese-dependent protein phosphatase genes, complete cds; laidlomycin biosynthetic gene cluster, complete sequence; putative membrane protein, putative major facilitator superfamily transporter, putative succinic semialdehyde dehydrogenase, hypothetical proteins,…	T1PKS	PKSI	Streptomyces sp. CS684	Bacteria,Actinobacteria,Streptomycetales,Streptomycetaceae,Streptomyces
BGC0000085	BGC0000085	Streptomyces rochei plasmid pSLA2-L DNA, complete sequence	T1PKS	PKSI	Streptomyces rochei	Bacteria,Actinobacteria,Streptomycetales,Streptomycetaceae,Streptomyces,Streptomyces rochei group
BGC0000086	BGC0000086	Streptomyces lasaliensis plasmid pKSL polyether antibiotic lasalocid biosynthesis gene cluster, partial sequence	T1PKS	PKSI	Streptomyces lasalocidi	Bacteria,Actinobacteria,Streptomycetales,Streptomycetaceae,Streptomyces
BGC0000087	BGC0000087	Streptomyces lasaliensis lasalocid biosynthetic gene cluster, strain NRRL 3382R	T1PKS	PKSI	Streptomyces lasalocidi	Bacteria,Actinobacteria,Streptomycetales,Streptomycetaceae,Streptomyces
BGC0000088	BGC0000088	Aspergillus terreus strain ATCC 20542 esterase, cytochrome P450 monooxygenase (lovA), enoyl reductase (lovC), transesterase (lovD), hydroxymethylglutaryl-coenzyme A reductase, regulatory protein (lovE), polyketide synthase (lovF), regulatory protein, and cytochrome P450 monooxygenase genes, complete cds; and unknown genes	T1PKS	PKSI	Aspergillus terreus	Eukaryota,Fungi,Dikarya,Ascomycota,Pezizomycotina,Eurotiomycetes,Eurotiomycetidae,Eurotiales,Aspergillaceae,Aspergillus,Aspergillus subgen. Circumdati
BGC0000090	BGC0000090	Actinosynnema pretiosum subsp. pretiosum strain ATCC 31280 macbecin biosynthesis gene cluster, complete sequence	NRPS-like.T1PKS	PKS-NRP_Hybrids	Actinosynnema pretiosum subsp. pretiosum	Bacteria,Actinobacteria,Pseudonocardiales,Pseudonocardiaceae,Actinosynnema
BGC0000091	BGC0000091	Streptomyces sp. CNQ-617 marineosin biosynthetic gene cluster, complete sequence	T1PKS.prodigiosin.NRPS-like	PKS-NRP_Hybrids	Streptomyces sp. CNQ-617	Bacteria,Actinobacteria,Streptomycetales,Streptomycetaceae,Streptomyces
BGC0000092	BGC0000092	Micromonospora megalomicea subsp. nigra megalomicin biosynthetic gene cluster, partial sequence	T1PKS	PKSI	Micromonospora megalomicea subsp. nigra	Bacteria,Actinobacteria,Micromonosporales,Micromonosporaceae,Micromonospora
BGC0000093	BGC0000093	Streptomyces nanchangensis strain NS3226 meilingmycin biosynthetic gene cluster, partial sequence	T1PKS	PKSI	Streptomyces nanchangensis	Bacteria,Actinobacteria,Streptomycetales,Streptomycetaceae,Streptomyces
BGC0000094	BGC0000094	Streptomyces venezuelae methymycin/pikromycin polyketide synthase gene cluster, complete sequence	T1PKS	PKSI	Streptomyces venezuelae	Bacteria,Actinobacteria,Streptomycetales,Streptomycetaceae,Streptomyces
BGC0000096	BGC0000096	Midecamycin biosynthetic gene cluster	T1PKS	PKSI	Streptomyces mycarofaciens	Bacteria,Actinobacteria,Streptomycetales,Streptomycetaceae,Streptomyces
BGC0000097	BGC0000097	Streptomyces sp. MP39-85 putative lipoprotein and hypothetical protein genes, complete cds; and ML-449 biosynthetic gene cluster, complete sequence	T1PKS	PKSI	Streptomyces sp. MP39-85	Bacteria,Actinobacteria,Streptomycetales,Streptomycetaceae,Streptomyces
BGC0000098	BGC0000098	Monascus pilosus monacolin K biosynthetic gene cluster, complete sequence	T1PKS	PKSI	Monascus pilosus	Eukaryota,Fungi,Dikarya,Ascomycota,Pezizomycotina,Eurotiomycetes,Eurotiomycetidae,Eurotiales,Aspergillaceae,Monascus
BGC0000099	BGC0000099	Penicillium marneffei strain PM1 putative polyketide synthase PKS3 gene, complete cds	T1PKS	PKSI	Talaromyces marneffei	Eukaryota,Fungi,Dikarya,Ascomycota,Pezizomycotina,Eurotiomycetes,Eurotiomycetidae,Eurotiales,Trichocomaceae,Talaromyces,Talaromyces sect. Talaromyces
BGC0000100	BGC0000100	Streptomyces cinnamonensis polyether antibiotic monensin biosynthesis gene cluster, partial sequence	T1PKS	PKSI	Streptomyces virginiae	Bacteria,Actinobacteria,Streptomycetales,Streptomycetaceae,Streptomyces
BGC0000102	BGC0000102	Micromonospora griseorubida gene cluster for the polyketide macrolide mycinamicin, partial and comeplete cds	T1PKS	PKSI	Micromonospora griseorubida	Bacteria,Actinobacteria,Micromonosporales,Micromonosporaceae,Micromonospora
BGC0000103	BGC0000103	Mycobacterium ulcerans plasmid pMUM001, complete plasmid genome	T1PKS	PKSI	Mycobacterium ulcerans Agy99	Bacteria,Actinobacteria,Corynebacteriales,Mycobacteriaceae,Mycobacterium
BGC0000104	BGC0000104	Penicillium brevicompactum mycophenolic acid biosynthesis gene cluster, complete sequence	T1PKS	PKSI	Penicillium brevicompactum	Eukaryota,Fungi,Dikarya,Ascomycota,Pezizomycotina,Eurotiomycetes,Eurotiomycetidae,Eurotiales,Aspergillaceae,Penicillium
BGC0000105	BGC0000105	Streptomyces nanchangensis NS3226 polyether ionophore nanchangmycin biosynthetic gene cluster, complete sequence	T1PKS	PKSI	Streptomyces nanchangensis	Bacteria,Actinobacteria,Streptomycetales,Streptomycetaceae,Streptomyces
BGC0000106	BGC0000106	Streptomyces sp. CS naphthomycin biosynthetic gene cluster, partial sequence	NRPS-like.T1PKS	PKS-NRP_Hybrids	Streptomyces sp. CS	Bacteria,Actinobacteria,Streptomycetales,Streptomycetaceae,Streptomyces
BGC0000107	BGC0000107	TPA_asm: Aspergillus nidulans FGSC A4 chromosome II	T1PKS	PKSI	Aspergillus nidulans FGSC A4	Eukaryota,Fungi,Dikarya,Ascomycota,Pezizomycotina,Eurotiomycetes,Eurotiomycetidae,Eurotiales,Aspergillaceae,Aspergillus,Aspergillus subgen. Nidulantes
BGC0000108	BGC0000108	Streptomyces chattanoogensis strain L10 natamycin biosynthetic gene cluster, partial sequence	NRPS-like.T1PKS	PKS-NRP_Hybrids	Streptomyces chattanoogensis	Bacteria,Actinobacteria,Streptomycetales,Streptomycetaceae,Streptomyces
BGC0000109	BGC0000109	Streptomyces cyaneogriseus subsp. noncyanogenus gene cluster (nemR, nemG, nemF, nemA1-1, nemA1-2, nemA2, nemC, nemD, nemE, nemA3, nemA4, orf1), complete cds	T1PKS	PKSI	Streptomyces cyaneogriseus subsp. noncyanogenus	Bacteria,Actinobacteria,Streptomycetales,Streptomycetaceae,Streptomyces
BGC0000110	BGC0000110	Streptomyces orinoci neoaureothin biosynthetic gene cluster	T1PKS	PKSI	Streptomyces orinoci	Bacteria,Actinobacteria,Streptomycetales,Streptomycetaceae,Streptomyces
BGC0000111	BGC0000111	Streptomyces carzinostaticus DNA, biosynthetic gene cluster for antitumor antibiotic Neocarzilin, complete and partial cds	T1PKS	PKSI	Streptomyces carzinostaticus	Bacteria,Actinobacteria,Streptomycetales,Streptomycetaceae,Streptomyces
BGC0000112	BGC0000112	Streptomyces carzinostaticus subsp. neocarzinostaticus neocarzinostatin biosynthetic locus, complete sequence	butyrolactone.T1PKS	Others	Streptomyces carzinostaticus subsp. neocarzinostaticus	Bacteria,Actinobacteria,Streptomycetales,Streptomycetaceae,Streptomyces
BGC0000113	BGC0000113	Streptomyces caelestis cytochrome P-450 hydroxylase homolog (nidi) gene, partial cds; polyketide synthase modules 1 through 7 (nidA) genes, complete cds; and N-methyltransferase homolog gene, partial cds	T1PKS	PKSI	Streptomyces caelestis	Bacteria,Actinobacteria,Streptomycetales,Streptomycetaceae,Streptomyces
BGC0000114	BGC0000114	Streptomyces violaceusniger strain DSM 4137 polyether nigericin biosynthetic gene cluster, complete sequence	T1PKS	PKSI	Streptomyces violaceusniger	Bacteria,Actinobacteria,Streptomycetales,Streptomycetaceae,Streptomyces,Streptomyces violaceusniger group
BGC0000115	BGC0000115	Streptomyces noursei ATCC 11455 nystatin biosynthetic gene cluster, complete sequence	T1PKS	PKSI	Streptomyces noursei ATCC 11455	Bacteria,Actinobacteria,Streptomycetales,Streptomycetaceae,Streptomyces
BGC0000116	BGC0000116	Pseudonocardia autotrophica strain KCTC9441 polyene biosynthetic gene cluster, complete sequence	T1PKS	PKSI	Pseudonocardia autotrophica	Bacteria,Actinobacteria,Pseudonocardiales,Pseudonocardiaceae,Pseudonocardia
BGC0000117	BGC0000117	Streptomyces avermitilis oligomycin biosynthetic gene cluster	T1PKS	PKSI	Streptomyces avermitilis	Bacteria,Actinobacteria,Streptomycetales,Streptomycetaceae,Streptomyces
BGC0000118	BGC0000118	Streptomyces pactum pactamycin biosynthetic gene cluster, partial and complete cds, strain: NBRC 13433	PKS-like.arylpolyene.T1PKS	Others	Streptomyces pactum	Bacteria,Actinobacteria,Streptomycetales,Streptomycetaceae,Streptomyces
BGC0000119	BGC0000119	Streptomyces pactum strain ATCC 27456 pactamycin biosynthetic gene cluster, partial sequence	PKS-like.arylpolyene.T1PKS	Others	Streptomyces pactum	Bacteria,Actinobacteria,Streptomycetales,Streptomycetaceae,Streptomyces
BGC0000120	BGC0000120	Penicillium expansum strain NRRL 35695 patulin biosynthetic gene cluster, complete sequence	T1PKS	PKSI	Penicillium expansum	Eukaryota,Fungi,Dikarya,Ascomycota,Pezizomycotina,Eurotiomycetes,Eurotiomycetidae,Eurotiales,Aspergillaceae,Penicillium
BGC0000121	BGC0000121	Pestalotiopsis fici strain CGMCC3.15140 pestheic acid biosynthetic gene cluster, complete sequence	T1PKS	PKSI	Pestalotiopsis fici	Eukaryota,Fungi,Dikarya,Ascomycota,Pezizomycotina,Sordariomycetes,Xylariomycetidae,Xylariales,Sporocadaceae,Pestalotiopsis
BGC0000122	BGC0000122	Nannocystis pusilla strain B150 phenylnannolone gene cluster, partial sequence	NRPS-like.T1PKS	PKS-NRP_Hybrids	Nannocystis pusilla	Bacteria,Proteobacteria,Deltaproteobacteria,Myxococcales,Nannocystineae,Nannocystaceae,Nannocystis
BGC0000123	BGC0000123	Streptomyces sp. HK803 PlmR5 (plmR5), PlmR4 (plmR4), PlmR3 (plmR3), PlmR2 (plmR2), Plm8 (plm8), Plm4 (plm4), Plm5 (plm5), Plm6 (plm6), Plm7 (plm7), PlmT8 (plmT8), PlmT7 (plmT7), PlmT6 (plmT6), PlmT5 (plmT5), PlmT4 (plmT4), PlmT3 (plmT3), PlmT2 (plmT2), PlmT1 (plmT1), Plm1 (plm1), Plm2-3 (plm2-3), PlmJK (plmJK), PlmL (plmL), ChcA (chcA), PlmM (plmM), PlmR1 (plmR1), PlmI (plmI), PlmS2 (plmS2), PlmS…	T1PKS	PKSI	Streptomyces sp. HK803	Bacteria,Actinobacteria,Streptomycetales,Streptomycetaceae,Streptomyces
BGC0000124	BGC0000124	Streptomyces piomogenus piericidin A1 gene cluster, partial sequence	T1PKS	PKSI	Streptomyces piomogenus	Bacteria,Actinobacteria,Streptomycetales,Streptomycetaceae,Streptomyces
BGC0000125	BGC0000125	Streptomyces natalensis pimaricin biosynthetic gene cluster	NRPS-like.T1PKS	PKS-NRP_Hybrids	Streptomyces natalensis	Bacteria,Actinobacteria,Streptomycetales,Streptomycetaceae,Streptomyces
BGC0000126	BGC0000126	Streptomyces platensis pldAI, pldAII, pldAIII, pldAIV, pldB, pldC, pldD, pldR gene cluster, complete cds, strain: Mer-11107	T1PKS	PKSI	Streptomyces platensis	Bacteria,Actinobacteria,Streptomycetales,Streptomycetaceae,Streptomyces
BGC0000127	BGC0000127	Pseudomonas fluorescens strain Pf-5 pyoluteorin biosynthetic gene cluster, partial sequence	T1PKS	PKSI	Pseudomonas protegens Pf-5	Bacteria,Proteobacteria,Gammaproteobacteria,Pseudomonadales,Pseudomonadaceae,Pseudomonas
BGC0000128	BGC0000128	Pseudomonas sp. M18 pyoluteorin biosynthetic and ABC transporter gene cluster, partial sequence	T1PKS	PKSI	Pseudomonas sp. M18	Bacteria,Proteobacteria,Gammaproteobacteria,Pseudomonadales,Pseudomonadaceae,Pseudomonas
BGC0000129	BGC0000129	Aspergillus fumigatus Af293 chromosome 6, whole genome shotgun sequence	T1PKS	PKSI	Aspergillus fumigatus Af293	Eukaryota,Fungi,Dikarya,Ascomycota,Pezizomycotina,Eurotiomycetes,Eurotiomycetidae,Eurotiales,Aspergillaceae,Aspergillus,Aspergillus subgen. Fumigati
BGC0000130	BGC0000130	Streptomyces vitaminophilus ATCC 31673 pyrrolomycin biosynthetic gene cluster, complete sequence	T1PKS	PKSI	Streptomyces vitaminophilus	Bacteria,Actinobacteria,Streptomycetales,Streptomycetaceae,Streptomyces
BGC0000131	BGC0000131	Streptomyces sp. UC 11065 pyrrolomycin biosynthetic gene cluster, partial sequence		Others	Streptomyces sp. UC 11065	Bacteria,Actinobacteria,Streptomycetales,Streptomycetaceae,Streptomyces
BGC0000132	BGC0000132	Streptomyces sp. UC 11065 pyrrolomycin biosynthetic gene cluster, partial sequence	T1PKS	PKSI	Streptomyces sp. UC 11065	Bacteria,Actinobacteria,Streptomycetales,Streptomycetaceae,Streptomyces
BGC0000133	BGC0000133	Amycolatopsis orientalis quartromicin biosynthetic gene cluster, complete sequence	T1PKS	PKSI	Amycolatopsis orientalis	Bacteria,Actinobacteria,Pseudonocardiales,Pseudonocardiaceae,Amycolatopsis
BGC0000134	BGC0000134	Pochonia chlamydosporia strain ATCC 16683 radicicol gene cluster, partial sequence	T1PKS	PKSI	Pochonia chlamydosporia	Eukaryota,Fungi,Dikarya,Ascomycota,Pezizomycotina,Sordariomycetes,Hypocreomycetidae,Hypocreales,Clavicipitaceae,Pochonia
BGC0000135	BGC0000135	Streptomyces sp. SN-593 DNA, reveromycin biosynthetic gene cluster, complete sequence	T1PKS	PKSI	Streptomyces sp. SN-593	Bacteria,Actinobacteria,Streptomycetales,Streptomycetaceae,Streptomyces
BGC0000136	BGC0000136	Amycolatopsis mediterranei rifamycin biosynthetic gene cluster	NRPS-like.T1PKS	PKS-NRP_Hybrids	Amycolatopsis mediterranei S699	Bacteria,Actinobacteria,Pseudonocardiales,Pseudonocardiaceae,Amycolatopsis
BGC0000137	BGC0000137	Salinispora arenicola CNS-205, complete genome	NRPS-like.T1PKS	PKS-NRP_Hybrids	Salinispora arenicola CNS-205	Bacteria,Actinobacteria,Micromonosporales,Micromonosporaceae,Salinispora
BGC0000138	BGC0000138	Streptomyces diastaticus polyketide rim gene cluster, partial sequence	T1PKS.NRPS-like	PKS-NRP_Hybrids	Streptomyces diastaticus	Bacteria,Actinobacteria,Streptomycetales,Streptomycetaceae,Streptomyces,Streptomyces diastaticus group
BGC0000140	BGC0000140	Streptomyces sp. 88-682 putative dipeptidyl aminopeptidase gene, complete cds; tetronate RK-682 biosynthetic gene cluster, complete sequence; and putative beta-lactamase domain-containing protein gene, complete cds	T1PKS	PKSI	Streptomyces sp. 88-682	Bacteria,Actinobacteria,Streptomycetales,Streptomycetaceae,Streptomyces
BGC0000141	BGC0000141	Streptomyces achromogenes subsp. rubradiris complete rubradirin gene cluster, strain NRRL 3061	T1PKS.aminocoumarin.NRPS-like	Others	Streptomyces rubradiris	Bacteria,Actinobacteria,Streptomycetales,Streptomycetaceae,Streptomyces
BGC0000142	BGC0000142	Salinispora tropica CNB-440, complete genome	RRE-containing.T1PKS	Others	Salinispora tropica CNB-440	Bacteria,Actinobacteria,Micromonosporales,Micromonosporaceae,Salinispora
BGC0000143	BGC0000143	Streptomyces albus strain CCM4719 salinomycin biosynthetic gene cluster, partial sequence	T1PKS	PKSI	Streptomyces albus	Bacteria,Actinobacteria,Streptomycetales,Streptomycetaceae,Streptomyces
BGC0000144	BGC0000144	Streptomyces albus strain XM211 polyether ionophore salinomycin biosynthetic gene cluster, complete sequence and flanking region	butyrolactone.T1PKS	Others	Streptomyces albus	Bacteria,Actinobacteria,Streptomycetales,Streptomycetaceae,Streptomyces
BGC0000145	BGC0000145	Salinispora tropica strain CNB-476 salinosporamide A biosynthetic gene cluster, partial sequence	NRPS-like.transAT-PKS-like.T1PKS	PKS-NRP_Hybrids	Salinispora tropica	Bacteria,Actinobacteria,Micromonosporales,Micromonosporaceae,Salinispora
BGC0000146	BGC0000146	Alternaria solani solanapyrone biosynthetic gene cluster (sol6, sol5, sol4, sol3, sol2, sol1), complete cds	T1PKS	PKSI	Alternaria solani	Eukaryota,Fungi,Dikarya,Ascomycota,Pezizomycotina,Dothideomycetes,Pleosporomycetidae,Pleosporales,Pleosporineae,Pleosporaceae,Alternaria,Alternaria sect. Porri
BGC0000147	BGC0000147	Sorangium cellulosum acyl-CoA dehydrogenase (sorE), beta-hydroxybutyryl-CoA dehydrogenase (sorD), putative methoxymalonyl-CoA synthase (sorC), reductase (sorR), soraphen polyketide synthase A (sorA), soraphen polyketide synthase B (sorB), O-methyltransferase (sorM), beta-mannanase, and xylanse-arabinofuranosidase bifunctional enzyme genes, complete cds; and unknown genes	T1PKS	PKSI	Sorangium cellulosum	Bacteria,Proteobacteria,Deltaproteobacteria,Myxococcales,Sorangiineae,Polyangiaceae,Sorangium
BGC0000148	BGC0000148	Saccharopolyspora spinosa probable lysR-type transcriptional regulator, probable keto acyl reductase, spinosad biosynthetic gene cluster, complete sequence, and probable exodeoxyribonuclease V genes, complete cds; and unknown gene	T1PKS	PKSI	Saccharopolyspora spinosa	Bacteria,Actinobacteria,Pseudonocardiales,Pseudonocardiaceae,Saccharopolyspora
BGC0000149	BGC0000149	Polyangium cellulosum spirangien biosynthetic gene cluster, strain So ce90	T1PKS	PKSI	Sorangium cellulosum	Bacteria,Proteobacteria,Deltaproteobacteria,Myxococcales,Sorangiineae,Polyangiaceae,Sorangium
BGC0000150	BGC0000150	Salinispora tropica CNB-440, complete genome	NRPS-like.T1PKS	PKS-NRP_Hybrids	Salinispora tropica CNB-440	Bacteria,Actinobacteria,Micromonosporales,Micromonosporaceae,Salinispora
BGC0000151	BGC0000151	Streptomyces ambofaciens ATCC 23877 right chromosomal arm	T1PKS	PKSI	Streptomyces ambofaciens ATCC 23877	Bacteria,Actinobacteria,Streptomycetales,Streptomycetaceae,Streptomyces
BGC0000152	BGC0000152	Emericella nidulans sterigmatocystin biosynthetic gene cluster: (stcA), (stcB), (stcC), (stcE), (aflR), (stcF), (stcI), (stcJ), (stcK), (stcL), (stcO), (stcQ), (stcS), (stcT), (stcU), (stcV) and (stcW) genes, complete cds	T1PKS	PKSI	Aspergillus nidulans	Eukaryota,Fungi,Dikarya,Ascomycota,Pezizomycotina,Eurotiomycetes,Eurotiomycetidae,Eurotiales,Aspergillaceae,Aspergillus,Aspergillus subgen. Nidulantes
BGC0000153	BGC0000153	Stigmatella aurantiaca ORF8, ORF7, ORF6, ORF5, ORF4, ORF3, ORF2, ORF1, stiA gene, stiB gene, stiC gene, stiD gene, stiE gene, stiF gene, stiG gene, stiH gene, stiJ gene, stiK gene, stiL gene and ORF9	T1PKS	PKSI	Stigmatella aurantiaca Sg a15	Bacteria,Proteobacteria,Deltaproteobacteria,Myxococcales,Cystobacterineae,Archangiaceae,Stigmatella
BGC0000154	BGC0000154	Talaromyces stipitatus ATCC 10500 scf_1105507295555 genomic scaffold, whole genome shotgun sequence	T1PKS	PKSI	Talaromyces stipitatus ATCC 10500	Eukaryota,Fungi,Dikarya,Ascomycota,Pezizomycotina,Eurotiomycetes,Eurotiomycetidae,Eurotiales,Trichocomaceae,Talaromyces,Talaromyces sect. Talaromyces
BGC0000156	BGC0000156	Aspergillus niger strain ATCC 1015 TAN-1612 biosynthetic gene cluster, partial sequence	T1PKS	PKSI	Aspergillus niger	Eukaryota,Fungi,Dikarya,Ascomycota,Pezizomycotina,Eurotiomycetes,Eurotiomycetidae,Eurotiales,Aspergillaceae,Aspergillus,Aspergillus subgen. Circumdati
BGC0000157	BGC0000157	Streptomyces sp. CK4412 tautomycetin biosynthetic gene cluster, complete sequence	T1PKS	PKSI	Streptomyces sp. CK4412	Bacteria,Actinobacteria,Streptomycetales,Streptomycetaceae,Streptomyces
BGC0000158	BGC0000158	Streptomyces griseochromogenes tautomycetin biosynthetic gene cluster, complete sequence	T1PKS	PKSI	Streptomyces griseochromogenes	Bacteria,Actinobacteria,Streptomycetales,Streptomycetaceae,Streptomyces
BGC0000159	BGC0000159	Streptomyces spiroverticillatus conserved hypothetical protein, hypothetical proteins, putative dehydrogenase, putative MOSC ferredoxin--oxidoreductase, and hypothetical protein genes, complete cds; tautomycin gene cluster, complete sequence; and hypothetical protein genes, complete cds	T1PKS	PKSI	Streptomyces spiroverticillatus	Bacteria,Actinobacteria,Streptomycetales,Streptomycetaceae,Streptomyces
BGC0000160	BGC0000160	Aspergillus terreus NIH2624 scaffold_9 genomic scaffold, whole genome shotgun sequence	T1PKS	PKSI	Aspergillus terreus NIH2624	Eukaryota,Fungi,Dikarya,Ascomycota,Pezizomycotina,Eurotiomycetes,Eurotiomycetidae,Eurotiales,Aspergillaceae,Aspergillus,Aspergillus subgen. Circumdati
BGC0000161	BGC0000161	Aspergillus terreus NIH2624 scaffold_1 genomic scaffold, whole genome shotgun sequence	T1PKS	PKSI	Aspergillus terreus NIH2624	Eukaryota,Fungi,Dikarya,Ascomycota,Pezizomycotina,Eurotiomycetes,Eurotiomycetidae,Eurotiales,Aspergillaceae,Aspergillus,Aspergillus subgen. Circumdati
BGC0000162	BGC0000162	Micromonospora chalcea tetrocarcin A gene cluster, complete sequence	T1PKS	PKSI	Micromonospora chalcea	Bacteria,Actinobacteria,Micromonosporales,Micromonosporaceae,Micromonospora
BGC0000163	BGC0000163	Streptomyces longisporoflavus strain NCIMB 11426 putative ABC transporter permease protein gene, partial cds; putative ABC transporter permease protein, conserved hypothetical protein, putative sugar kinase, zinc-binding dehydrogenase, integral membrane sugar transport protein, putative ABC transporter permease protein, putative multiple sugar ABC transporter solute-binding protein, DeoR family t…	T1PKS	PKSI	Streptomyces longisporoflavus	Bacteria,Actinobacteria,Streptomycetales,Streptomycetaceae,Streptomyces
BGC0000164	BGC0000164	Streptomyces sp. NRRL 11266 tetronomycin biosynthetic gene cluster, partial and complete cds	T1PKS	PKSI	Streptomyces sp. NRRL 11266	Bacteria,Actinobacteria,Streptomycetales,Streptomycetaceae,Streptomyces
BGC0000165	BGC0000165	Dactylosporangium aurantiacum subsp. hamdenensis strain NRRL 18085 tiacumicin biosynthesis gene cluster, genomic sequence	PKS-like.T1PKS	PKSother	Dactylosporangium aurantiacum subsp. hamdenensis	Bacteria,Actinobacteria,Micromonosporales,Micromonosporaceae,Dactylosporangium
BGC0000166	BGC0000166	Streptomyces fradiae tylactone synthase, starter module and modules 1-7, (tylG) gene, complete cds	T1PKS	PKSI	Streptomyces fradiae	Bacteria,Actinobacteria,Streptomycetales,Streptomycetaceae,Streptomyces
BGC0000167	BGC0000167	Streptomyces halstedii vicenistatin biosynthetic gene cluster (vinR1, vinA, vinB, vinC, vinP2, vinP3, vinP4, vinG, vinF, vinD, vinE, vinH, vinI, vinJ, vinK, vinL, vinM, vinN, vinO, vinP1), partial and complete cds	T1PKS	PKSI	Streptomyces halstedii	Bacteria,Actinobacteria,Streptomycetales,Streptomycetaceae,Streptomyces
BGC0000168	BGC0000168	Penicillium aethiopicum strain IBT 5753 viridicatumtoxin biosynthetic gene cluster, complete sequence; and unknown genes	indole.T1PKS	Others	Penicillium aethiopicum	Eukaryota,Fungi,Dikarya,Ascomycota,Pezizomycotina,Eurotiomycetes,Eurotiomycetidae,Eurotiales,Aspergillaceae,Penicillium
BGC0000170	BGC0000170	Aspergillus niger ATCC 1015, whole genome shotgun sequence	T1PKS	PKSI	Aspergillus niger ATCC 1015	Eukaryota,Fungi,Dikarya,Ascomycota,Pezizomycotina,Eurotiomycetes,Eurotiomycetidae,Eurotiales,Aspergillaceae,Aspergillus,Aspergillus subgen. Circumdati
BGC0000171	BGC0000171	Streptomyces himastatinicus ATCC 53653 9-methylstreptimidone biosynthesis gene cluster	transAT-PKS	PKSother	Streptomyces himastatinicus ATCC 53653	Bacteria,Actinobacteria,Streptomycetales,Streptomycetaceae,Streptomyces,Streptomyces violaceusniger group
BGC0000172	BGC0000172	Brevibacillus laterosporus PE36 PE_F_(paired)_contig_20, whole genome shotgun sequence	transAT-PKS	PKSother	Brevibacillus laterosporus PE36	Bacteria,Firmicutes,Bacilli,Bacillales,Paenibacillaceae,Brevibacillus
BGC0000173	BGC0000173	Burkholderia gladioli strain DMSZ11318 putative regulator gene, partial cds; putative regulator gene, complete cds; and bongkrekic acid biosynthentic gene cluster, partial sequence	T3PKS.transAT-PKS.PKS-like	PKSother	Burkholderia gladioli	Bacteria,Proteobacteria,Betaproteobacteria,Burkholderiales,Burkholderiaceae,Burkholderia
BGC0000174	BGC0000174	Candidatus Endobugula sertula isolate DEEP bryostatin ABCDX gene cluster, complete sequence	transAT-PKS-like	PKSother	Candidatus Endobugula sertula	Bacteria,Proteobacteria,Gammaproteobacteria,Cellvibrionales,Cellvibrionaceae,Candidatus Endobugula
BGC0000175	BGC0000175	Streptomyces sp. YIM 56141 hypothetical protein genes, complete cds; cycloheximide biosynthetic gene cluster, complete sequence; and hypothetical protein genes, complete cds	lanthipeptide-class-iv.transAT-PKS.NRPS-like	Others	Streptomyces sp. YIM 56141	Bacteria,Actinobacteria,Streptomycetales,Streptomycetaceae,Streptomyces
BGC0000176	BGC0000176	Bacillus amyloliquefaciens dif gene cluster directing synthesis of difficidin/oxydifficidin, strain FZB42	transAT-PKS	PKSother	Bacillus velezensis FZB42	Bacteria,Firmicutes,Bacilli,Bacillales,Bacillaceae,Bacillus,Bacillus amyloliquefaciens group
BGC0000177	BGC0000177	Streptomyces platensis subsp. rosaceus strain NRRL 18993 dorrigocin/migrastatin gene cluster, complete sequence	transAT-PKS	PKSother	Streptomyces platensis subsp. rosaceus	Bacteria,Actinobacteria,Streptomycetales,Streptomycetaceae,Streptomyces
BGC0000178	BGC0000178	Chitinophaga sancti major facilitator superfamily protein gene, complete cds; and biosynthesis gene cluster, complete sequence	PKS-like.transAT-PKS.T3PKS.NRPS-like	PKS-NRP_Hybrids	Chitinophaga sancti	Bacteria,Bacteroidetes,Chitinophagia,Chitinophagales,Chitinophagaceae,Chitinophaga
BGC0000179	BGC0000179	Sorangium cellulosum 'So ce 56' complete genome	transAT-PKS	PKSother	Sorangium cellulosum So ce56	Bacteria,Proteobacteria,Deltaproteobacteria,Myxococcales,Sorangiineae,Polyangiaceae,Sorangium
BGC0000180	BGC0000180	Legionella parisiensis strain ATCC 35299 lgl gene cluster, complete sequence	transAT-PKS-like.NRPS-like	PKS-NRP_Hybrids	Legionella parisiensis	Bacteria,Proteobacteria,Gammaproteobacteria,Legionellales,Legionellaceae,Legionella
BGC0000181	BGC0000181	Bacillus amyloliquefaciens pks2 gene cluster, strain FZB42	transAT-PKS	PKSother	Bacillus velezensis FZB42	Bacteria,Firmicutes,Bacilli,Bacillales,Bacillaceae,Bacillus,Bacillus amyloliquefaciens group
BGC0000182	BGC0000182	Pseudomonas fluorescens NCIMB 10586 mupirocin biosynthetic gene cluster	PKS-like.transAT-PKS.hserlactone	Others	Pseudomonas fluorescens	Bacteria,Proteobacteria,Gammaproteobacteria,Pseudomonadales,Pseudomonadaceae,Pseudomonas
BGC0000184	BGC0000184	Sorangium cellulosum strain So ce12 sorangicin gene cluster, complete sequence	transAT-PKS	PKSother	Sorangium cellulosum	Bacteria,Proteobacteria,Deltaproteobacteria,Myxococcales,Sorangiineae,Polyangiaceae,Sorangium
BGC0000185	BGC0000185	Teredinibacter turnerae T7901, complete genome	transAT-PKS	PKSother	Teredinibacter turnerae T7901	Bacteria,Proteobacteria,Gammaproteobacteria,Cellvibrionales,Cellvibrionaceae,Teredinibacter
BGC0000186	BGC0000186	Burkholderia thailandensis E264 chromosome II, complete sequence	PKS-like.transAT-PKS.NRPS	PKS-NRP_Hybrids	Burkholderia thailandensis E264	Bacteria,Proteobacteria,Betaproteobacteria,Burkholderiales,Burkholderiaceae,Burkholderia,pseudomallei group
BGC0000187	BGC0000187	Streptomyces nodosus subsp. asukaensis strain ATCC 29757 hypothetical protein genes, complete cds; asukamycin biosynthetic gene cluster, complete sequence	furan	Others	Streptomyces nodosus subsp. asukaensis	Bacteria,Actinobacteria,Streptomycetales,Streptomycetaceae,Streptomyces
BGC0000188	BGC0000188	Cylindrospermopsis raciborskii T3 toxin biosynthesis gene cluster, complete sequence		Others	Cylindrospermopsis raciborskii T3	Bacteria,Cyanobacteria,Nostocales,Aphanizomenonaceae,Cylindrospermopsis
BGC0000189	BGC0000189	Xenorhabdus bovienii SS-2004 chromosome, complete genome		Others	Xenorhabdus bovienii SS-2004	Bacteria,Proteobacteria,Gammaproteobacteria,Enterobacterales,Morganellaceae,Xenorhabdus
BGC0000190	BGC0000190	Streptomyces sp. SANK 61196 SAN biosynthetic gene cluster, complete sequence	T2PKS	PKSother	Streptomyces sp. SANK 61196	Bacteria,Actinobacteria,Streptomycetales,Streptomycetaceae,Streptomyces
BGC0000191	BGC0000191	Streptomyces galilaeus aklavinone-aclacinomycin biosynthesis gene cluster, complete cds	PKS-like.T2PKS	PKSother	Streptomyces galilaeus	Bacteria,Actinobacteria,Streptomycetales,Streptomycetaceae,Streptomyces
BGC0000192	BGC0000192	Streptomyces galilaeus aclacinomycin biosynthesis gene cluster, partial sequence	PKS-like.T2PKS	PKSother	Streptomyces galilaeus	Bacteria,Actinobacteria,Streptomycetales,Streptomycetaceae,Streptomyces
BGC0000193	BGC0000193	Streptomyces galilaeus aclacinomycin biosynthetic gene cluster, partial sequence		Others	Streptomyces galilaeus	Bacteria,Actinobacteria,Streptomycetales,Streptomycetaceae,Streptomyces
BGC0000194	BGC0000194	Streptomyces coelicolor A3(2) complete genome	T2PKS	PKSother	Streptomyces coelicolor A3(2)	Bacteria,Actinobacteria,Streptomycetales,Streptomycetaceae,Streptomyces,Streptomyces albidoflavus group
BGC0000195	BGC0000195	Streptomyces sp. CM020 alnumycin gene cluster, complete sequence	T2PKS	PKSother	Streptomyces sp. CM020	Bacteria,Actinobacteria,Streptomycetales,Streptomycetaceae,Streptomyces
BGC0000196	BGC0000196	Photorhabdus luminescens subsp. laumondii TTO1 complete genome		Others	Photorhabdus laumondii subsp. laumondii TTO1	Bacteria,Proteobacteria,Gammaproteobacteria,Enterobacterales,Morganellaceae,Photorhabdus
BGC0000197	BGC0000197	Streptomyces echinatus aranciamycin biosynthetic gene cluster, complete sequence	T2PKS	PKSother	Streptomyces echinatus	Bacteria,Actinobacteria,Streptomycetales,Streptomycetaceae,Streptomyces
BGC0000198	BGC0000198	Salinispora arenicola CNB527 B033DRAFT_scaffold_1.2_C, whole genome shotgun sequence	T2PKS	PKSother	Salinispora arenicola CNB527	Bacteria,Actinobacteria,Micromonosporales,Micromonosporaceae,Salinispora
BGC0000199	BGC0000199	Uncultured bacterium clone AZ129 arimetamycin gene cluster, complete sequence	T2PKS.oligosaccharide	Others	uncultured bacterium	Bacteria,environmental samples
BGC0000200	BGC0000200	Uncultured bacterium arixanthomycin gene cluster, complete sequence	T2PKS	PKSother	uncultured bacterium	Bacteria,environmental samples
BGC0000201	BGC0000201	Streptomyces aureofaciens strain CCM3239 plasmid pSA3239, complete sequence	T2PKS	PKSother	Streptomyces aureofaciens	Bacteria,Actinobacteria,Streptomycetales,Streptomycetaceae,Streptomyces
BGC0000202	BGC0000202	Kibdelosporangium sp. MJ126-NF4 azicemicins biosynthetic gene cluster, complete sequence	T2PKS	PKSother	Kibdelosporangium sp. MJ126-NF4	Bacteria,Actinobacteria,Pseudonocardiales,Pseudonocardiaceae,Kibdelosporangium,unclassified Kibdelosporangium
BGC0000203	BGC0000203	Amycolatopsis orientalis subsp. vinearia strain BA-07585 BE-7585A biosynthetic gene cluster, complete sequence	T2PKS	PKSother	Amycolatopsis orientalis subsp. vinearia	Bacteria,Actinobacteria,Pseudonocardiales,Pseudonocardiaceae,Amycolatopsis
BGC0000204	BGC0000204	Streptomyces sp. A2991200 benG gene, benF gene, benE gene, benD gene, benA gene, benB gene, benC gene, benH gene, benJ gene, benR gene, benL gene and benQ gene	T2PKS	PKSother	Streptomyces sp. A2991200	Bacteria,Actinobacteria,Streptomycetales,Streptomycetaceae,Streptomyces
BGC0000205	BGC0000205	Candidatus Endobugula sertula isolate DEEP transposase-like protein gene, complete cds; bryostatin PQRS gene cluster, complete sequence; and oxidoreductase gene, complete cds	PKS-like.T3PKS	PKSother	Candidatus Endobugula sertula	Bacteria,Proteobacteria,Gammaproteobacteria,Cellvibrionales,Cellvibrionaceae,Candidatus Endobugula
BGC0000207	BGC0000207	Streptomyces chartreusis HKI-249 chartreusin biosynthesis gene cluster B		Others	Streptomyces chartreusis	Bacteria,Actinobacteria,Streptomycetales,Streptomycetaceae,Streptomyces
BGC0000208	BGC0000208	Amycolatopsis sulphurea strain NRRL 2822 chelocardin biosynthesis gene cluster, complete sequence	T2PKS	PKSother	Amycolatopsis sulphurea	Bacteria,Actinobacteria,Pseudonocardiales,Pseudonocardiaceae,Amycolatopsis
BGC0000209	BGC0000209	Streptomyces aureofaciens strain F3 chlortetracycline biosynthesis gene cluster, partial sequence	T2PKS	PKSother	Kitasatospora aureofaciens	Bacteria,Actinobacteria,Streptomycetales,Streptomycetaceae,Kitasatospora
BGC0000210	BGC0000210	Streptomyces griseus subsp. griseus chromomycin A3 biosynthesis gene cluster, strain ATCC13273	T2PKS.oligosaccharide	Others	Streptomyces griseus subsp. griseus	Bacteria,Actinobacteria,Streptomycetales,Streptomycetaceae,Streptomyces
BGC0000211	BGC0000211	Streptomyces albaduncus chrysomycin biosynthetic gene cluster	T2PKS	PKSother	Streptomyces albaduncus	Bacteria,Actinobacteria,Streptomycetales,Streptomycetaceae,Streptomyces
BGC0000212	BGC0000212	Streptomyces sp. SPB74 genomic scaffold supercont3.1, whole genome shotgun sequence	PKS-like.T2PKS	PKSother	Streptomyces sp. SPB074	Bacteria,Actinobacteria,Streptomycetales,Streptomycetaceae,Streptomyces
BGC0000213	BGC0000213	Streptomyces aureus strain SOK1/5-04 genomic sequence	ladderane.furan	Others	Streptomyces aureus	Bacteria,Actinobacteria,Streptomycetales,Streptomycetaceae,Streptomyces
BGC0000214	BGC0000214	Streptomyces olindensis DAUFPE 5622 cosmomycin gene cluster, partial sequence	T2PKS	PKSother	Streptomyces olindensis	Bacteria,Actinobacteria,Streptomycetales,Streptomycetaceae,Streptomyces
BGC0000215	BGC0000215	S.curacoi polyketide synthase gene cluster	T2PKS	PKSother	Streptomyces cyaneus	Bacteria,Actinobacteria,Streptomycetales,Streptomycetaceae,Streptomyces
BGC0000216	BGC0000216	Dactylosporangium sp. SC14051 dactylocycline biosynthetic gene cluster, complete sequence	T2PKS	PKSother	Dactylosporangium sp. SC14051	Bacteria,Actinobacteria,Micromonosporales,Micromonosporaceae,Dactylosporangium,unclassified Dactylosporangium
BGC0000217	BGC0000217	Streptomyces sp. aklaviketone reductase (dauE) gene; cyclase/dehydrase (dauA) gene; polyketide reductase (dauB) gene; oxygenase, polyketide synthase, acyltransferase (dauA) genes; aklanonic acid methyltransferase (dauC) gene	T2PKS	PKSother	Streptomyces sp.	Bacteria,Actinobacteria,Streptomycetales,Streptomycetaceae,Streptomyces
BGC0000218	BGC0000218	Streptomyces peucetius daunorubicin-doxorubicin polyketide synthase (dnrH, dpsA-dpsF) genes, ORF5 and ORF8, complete cds	T2PKS	PKSother	Streptomyces peucetius	Bacteria,Actinobacteria,Streptomycetales,Streptomycetaceae,Streptomyces
BGC0000219	BGC0000219	Streptomyces olivaceus elloramycin gene cluster, strain Tu 2353	T2PKS	PKSother	Streptomyces olivaceus	Bacteria,Actinobacteria,Streptomycetales,Streptomycetaceae,Streptomyces
BGC0000220	BGC0000220	Streptomyces maritimus enterocin biosynthetic gene cluster, complete sequence	T2PKS	PKSother	Streptomyces maritimus	Bacteria,Actinobacteria,Streptomycetales,Streptomycetaceae,Streptomyces
BGC0000221	BGC0000221	Uncultured soil bacterium V167 Erd gene cluster, complete sequence; and unknown genes	T2PKS	PKSother	uncultured soil bacterium V167	Bacteria,environmental samples
BGC0000222	BGC0000222	Streptomyces sp. TA-0256 DNA, FD-594 producer gene cluster	T2PKS	PKSother	Streptomyces sp. TA-0256	Bacteria,Actinobacteria,Streptomycetales,Streptomycetaceae,Streptomyces
BGC0000223	BGC0000223	Uncultured bacterium BAC AB649/1850 fluostatin biosynthetic gene cluster, complete sequence	T2PKS	PKSother	uncultured bacterium BAC AB649/1850	Bacteria,environmental samples
BGC0000224	BGC0000224	Streptomyces griseus fredericamycin biosynthetic gene cluster, complete sequence	T2PKS	PKSother	Streptomyces griseus	Bacteria,Actinobacteria,Streptomycetales,Streptomycetaceae,Streptomyces
BGC0000225	BGC0000225	Streptomyces roseofulvus frenolicin biosynthetic gene cluster, complete sequence	T2PKS	PKSother	Streptomyces roseofulvus	Bacteria,Actinobacteria,Streptomycetales,Streptomycetaceae,Streptomyces
BGC0000226	BGC0000226	Streptomyces griseoflavus strain Goe 3592 gilvocarcin biosynthetic gene cluster, complete sequence	T2PKS	PKSother	Streptomyces griseoflavus	Bacteria,Actinobacteria,Streptomycetales,Streptomycetaceae,Streptomyces
BGC0000227	BGC0000227	Streptomyces violaceoruber Tu22 granaticin biosynthetic gene cluster	T2PKS.RRE-containing	Others	Streptomyces violaceoruber	Bacteria,Actinobacteria,Streptomycetales,Streptomycetaceae,Streptomyces,Streptomyces anthocyanicus group
BGC0000229	BGC0000229	Streptomyces lusitanus strain SCSIO LR32 grincamycin gene cluster, partial sequence	T2PKS.oligosaccharide	Others	Streptomyces lusitanus	Bacteria,Actinobacteria,Streptomycetales,Streptomycetaceae,Streptomyces
BGC0000230	BGC0000230	Streptomyces sp. JP95 griseorhodin biosynthesis gene cluster, complete sequence	T2PKS	PKSother	Streptomyces sp. JP95	Bacteria,Actinobacteria,Streptomycetales,Streptomycetaceae,Streptomyces
BGC0000231	BGC0000231	S.griseus genes for ketosynthase, acyl carrier protein, ketoreductase, cyclase and dehydrase	T2PKS	PKSother	Streptomyces griseus	Bacteria,Actinobacteria,Streptomycetales,Streptomycetaceae,Streptomyces
BGC0000232	BGC0000232	Streptomyces sp. 2238-SVT4 hatomarubigin biosynthesis gene cluster (orf1, hrbR1, hrbA, hrbB, hrbC, hrbD, hrbE, hrbF, hrbG, hrbH, hrbI, hrbJ, hrbK, hrbL, hrbM, hrbN, hrbO, hrbP, hrbQ, hrbR, hrbS, hrbT, hrbU, hrbV, hrbW, hrbX, hrbR2, hrbY, hrbR3, hrbZ1, hrbZ2, orf2, orf3), complete cds	T2PKS	PKSother	Streptomyces sp. 2238-SVT4	Bacteria,Actinobacteria,Streptomycetales,Streptomycetaceae,Streptomyces
BGC0000233	BGC0000233	Streptomyces griseoruber heda cluster, complete sequence	PKS-like.T2PKS.T1PKS	PKSother	Streptomyces griseoruber	Bacteria,Actinobacteria,Streptomycetales,Streptomycetaceae,Streptomyces
BGC0000234	BGC0000234	Streptomyces venezuelae JadJ (jadJ), jadomycin polyketide synthase cyclase (jadI), jadomycin polyketide ketosynthase (jadA), chain length determinant, acyl carrier protein (acp), ketoreductase, and bifunctional cyclase/dehydrase genes, complete cds	T2PKS	PKSother	Streptomyces venezuelae ATCC 10712	Bacteria,Actinobacteria,Streptomycetales,Streptomycetaceae,Streptomyces
BGC0000235	BGC0000235	Streptomyces sp. W007 contig00151, whole genome shotgun sequence	T2PKS	PKSother	Streptomyces sp. W007	Bacteria,Actinobacteria,Streptomycetales,Streptomycetaceae,Streptomyces
BGC0000236	BGC0000236	Streptomyces murayamaensis putative vitamin B12-dependent ribonucleotide reductase gene, partial cds; putative arylamine N-acetyltransferase, putative hydrolase, putative transmembrane efflux protein, putative transcriptional regulator, putative ribonuclease HII, putative ATP-dependent DNA helicase, putative bifunctional enzyme deaminase/reductase, putative TetR/AcrR-family transcriptional regula…	T2PKS	PKSother	Streptomyces murayamaensis	Bacteria,Actinobacteria,Streptomycetales,Streptomycetaceae,Streptomyces
BGC0000237	BGC0000237	Streptomyces sanglieri strain AK 623 lactonamycin Z biosynthetic gene cluster, partial sequence	T2PKS	PKSother	Streptomyces sanglieri	Bacteria,Actinobacteria,Streptomycetales,Streptomycetaceae,Streptomyces
BGC0000238	BGC0000238	Streptomyces rishiriensis strain MJ773-88K4 tyrosinase, putative small membrane protein, acyl carrier protein, phosphatase/acyl transferase, N-acetyltransferase, hypothetical protein, and S-adenosylmethionine decarboxylase genes, complete cds; lactonamycin biosynthetic gene cluster, complete sequence; and putative IS1650 family transposase gene, complete cds	butyrolactone.T2PKS	Others	Streptomyces rishiriensis	Bacteria,Actinobacteria,Streptomycetales,Streptomycetaceae,Streptomyces
BGC0000239	BGC0000239	Streptomyces cyanogenus landomycin biosynthetic gene cluster, complete sequence	T2PKS.oligosaccharide	Others	Streptomyces cyanogenus	Bacteria,Actinobacteria,Streptomycetales,Streptomycetaceae,Streptomyces
BGC0000240	BGC0000240	Salinispora pacifica strain DPJ-0016 lomaiviticin gene cluster, complete sequence	T2PKS	PKSother	Salinispora pacifica	Bacteria,Actinobacteria,Micromonosporales,Micromonosporaceae,Salinispora
BGC0000241	BGC0000241	Salinispora tropica CNB-440, complete genome	T2PKS	PKSother	Salinispora tropica CNB-440	Bacteria,Actinobacteria,Micromonosporales,Micromonosporaceae,Salinispora
BGC0000242	BGC0000242	Streptomyces tendae lysolipin biosynthesis gene cluster, strain Tu 4042	T2PKS	PKSother	Streptomyces tendae	Bacteria,Actinobacteria,Streptomycetales,Streptomycetaceae,Streptomyces
BGC0000243	BGC0000243	Streptomyces griseus subsp. griseus macrotetrolide biosynthesis gene cluster, upstream region		Others	Streptomyces griseus subsp. griseus	Bacteria,Actinobacteria,Streptomycetales,Streptomycetaceae,Streptomyces
BGC0000244	BGC0000244	Streptomyces griseus subsp. griseus macrotetrolide biosynthesis gene cluster, downstream region		Others	Streptomyces griseus subsp. griseus	Bacteria,Actinobacteria,Streptomycetales,Streptomycetaceae,Streptomyces
BGC0000245	BGC0000245	Streptomyces sp. AM-7161 medermycin biosynthetic gene cluster (med-ORF1 - 30) and ORF P - Z, partial and complete cds	T2PKS	PKSother	Streptomyces sp. AM-7161	Bacteria,Actinobacteria,Streptomycetales,Streptomycetaceae,Streptomyces
BGC0000247	BGC0000247	Streptomyces argillaceus mithramycin biosynthetic gene cluster	T2PKS.oligosaccharide	Others	Streptomyces argillaceus	Bacteria,Actinobacteria,Actinobacteridae,Actinomycetales,Streptomycineae,Streptomycetaceae,Streptomyces
BGC0000248	BGC0000248	Streptomyces arenae strain DSM 40737 scaffold23.1, whole genome shotgun sequence	T2PKS	PKSother	Streptomyces arenae	Bacteria,Actinobacteria,Streptomycetales,Streptomycetaceae,Streptomyces
BGC0000249	BGC0000249	Streptomyces nogalater nogalamycin biosynthetic gene cluster, complete sequence		Others	Streptomyces nogalater	Bacteria,Actinobacteria,Streptomycetales,Streptomycetaceae,Streptomyces
BGC0000252	BGC0000252	Streptomyces griseus subsp. griseus nonactin biosynthesis gene cluster, partial sequence		Others	Streptomyces griseus subsp. griseus	Bacteria,Actinobacteria,Streptomycetales,Streptomycetaceae,Streptomyces
BGC0000253	BGC0000253	Streptomyces antibioticus oviedomycin biosynthetic gene cluster, strain ATCC 11891	T2PKS	PKSother	Streptomyces antibioticus	Bacteria,Actinobacteria,Streptomycetales,Streptomycetaceae,Streptomyces
BGC0000254	BGC0000254	Streptomyces rimosus oxytetracycline gene cluster, complete sequence	T2PKS	PKSother	Streptomyces rimosus	Bacteria,Actinobacteria,Streptomycetales,Streptomycetaceae,Streptomyces
BGC0000255	BGC0000255	Symbiont bacterium of Paederus fuscipes tRNA-Arg gene, complete sequence; MutM gene, complete cds; and pederin biosynthesis gene cluster, complete sequence	PKS-like.T3PKS	PKSother	symbiont bacterium of Paederus fuscipes Bacteria.
BGC0000256	BGC0000256	Actinomadura hibisca strain P157-2 pradimicin biosynthetic gene cluster, complete sequence	T2PKS	PKSother	Actinomadura hibisca	Bacteria,Actinobacteria,Streptosporangiales,Thermomonosporaceae,Actinomadura
[truncated: 24,119 more rows]
