# Supplementary material for: A quantitative microbiome atlas reveals hidden diversity, eukaryotic keystones, and evolutionary trade-offs in plant rhizospheres
Source: Research Square preprint supplement (doi:10.21203/rs.3.rs-7503976/v1), 2025-09-12
Supplement: Supplementary file 5 [file 527969433b64b285c85d50c4.xlsx]

## Sheet: Table S6A
Supplementary Information Table 6. Topological classification and centrality metrics of hub ASVs and functional orthologs in rhizosphere co-abundance networks. (A) Methodological validation: QMP vs. RMP microbial interactions. Quantitative Microbiome Profiling (QMP) significantly outperformed Relative Microbiome Profiling (RMP) in detecting true ecological linkages. (B–C) Keystone ASV hubs in int…
Source	Taxa1	Taxa2	Taxa1_clade	Taxa2_clade	RMP_R	RMP_P	QMP_R	QMP_P
This work	Micrococcales	Acidobacteriales	Bacteira	Bacteira	-0.380648	0	-0.194103	6.55385e-11
Wang et al.,2024	Micrococcales	Acidobacteriales	Bacteira	Bacteira	0.119102	0.0437909	-0.293994	3.95015e-07
This work	Solirubrobacterales	Acidobacteriales	Bacteira	Bacteira	0.104343	4.25407e-05	0.198559	2.33338e-11
Wang et al.,2024	Solirubrobacterales	Acidobacteriales	Bacteira	Bacteira	0.219935	0.000172811	0.0646264	0.275183
This work	Acidobacteriales	Bacillales	Bacteira	Bacteira	-0.144551	1.30842e-08	0.0685238	0.0222433
Wang et al.,2024	Acidobacteriales	Bacillales	Bacteira	Bacteira	0.325549	1.64597e-08	0.201471	0.00059582
This work	Gaiellales	Bacillales	Bacteira	Bacteira	0.213715	0	0.566821	0
Wang et al.,2024	Gaiellales	Bacillales	Bacteira	Bacteira	0.659352	0	0.405245	9.05498e-13
This work	Micrococcales	Bacillales	Bacteira	Bacteira	0.228477	0	0.595051	0
Wang et al.,2024	Micrococcales	Bacillales	Bacteira	Bacteira	0.60499	0	0.279024	1.57055e-06
This work	Solirubrobacterales	Bacillales	Bacteira	Bacteira	0.0118135	0.643951	0.442768	0
Wang et al.,2024	Solirubrobacterales	Bacillales	Bacteira	Bacteira	0.60059	0	0.369038	1.09047e-10
This work	Sphingomonadales	Bacillales	Bacteira	Bacteira	-0.0951554	0.000190645	0.450323	0
Wang et al.,2024	Sphingomonadales	Bacillales	Bacteira	Bacteira	0.186408	0.00151387	0.311249	7.27661e-08
This work	Acidobacteriales	Burkholderiales	Bacteira	Bacteira	0.104233	4.33396e-05	0.181145	1.15099e-09
Wang et al.,2024	Acidobacteriales	Burkholderiales	Bacteira	Bacteira	0.466232	0	0.568229	0
This work	Bacillales	Burkholderiales	Bacteira	Bacteira	-0.0387748	0.12914	0.560737	0
Wang et al.,2024	Bacillales	Burkholderiales	Bacteira	Bacteira	0.103317	0.0805784	0.32127	2.58883e-08
This work	Gaiellales	Burkholderiales	Bacteira	Bacteira	-0.025402	0.320258	0.506071	0
Wang et al.,2024	Gaiellales	Burkholderiales	Bacteira	Bacteira	0.383565	1.7113e-11	0.651926	0
This work	Micrococcales	Burkholderiales	Bacteira	Bacteira	0.208532	0	0.604807	0
Wang et al.,2024	Micrococcales	Burkholderiales	Bacteira	Bacteira	0.189032	0.0012932	0.18904	0.0012926
This work	Solirubrobacterales	Burkholderiales	Bacteira	Bacteira	-0.0927109	0.000278162	0.483902	0
Wang et al.,2024	Solirubrobacterales	Burkholderiales	Bacteira	Bacteira	0.361265	2.8299e-10	0.632759	0
This work	Sphingomonadales	Burkholderiales	Bacteira	Bacteira	0.412118	0	0.715318	0
Wang et al.,2024	Sphingomonadales	Burkholderiales	Bacteira	Bacteira	0.597806	0	0.839578	0
This work	Acidobacteriales	Enterobacterales	Bacteira	Bacteira	-0.271973	0	-0.0117468	0.695452
Wang et al.,2024	Acidobacteriales	Enterobacterales	Bacteira	Bacteira	-0.240599	3.80726e-05	0.13419	0.0229844
This work	Bacillales	Enterobacterales	Bacteira	Bacteira	0.0268226	0.293934	0.399865	0
Wang et al.,2024	Bacillales	Enterobacterales	Bacteira	Bacteira	-0.126747	0.0318318	0.279636	1.48674e-06
This work	Burkholderiales	Enterobacterales	Bacteira	Bacteira	-0.0969959	0.000142604	0.472384	0
Wang et al.,2024	Burkholderiales	Enterobacterales	Bacteira	Bacteira	0.144702	0.0141422	0.535523	0
This work	Gaiellales	Enterobacterales	Bacteira	Bacteira	-0.506028	0	0.0922345	0.00206857
Wang et al.,2024	Gaiellales	Enterobacterales	Bacteira	Bacteira	-0.256692	1.06439e-05	0.261663	7.05552e-06
This work	Micrococcales	Enterobacterales	Bacteira	Bacteira	0.00923595	0.717851	0.370402	0
Wang et al.,2024	Micrococcales	Enterobacterales	Bacteira	Bacteira	-0.212056	0.000296872	0.0905147	0.12605
This work	Solirubrobacterales	Enterobacterales	Bacteira	Bacteira	-0.44333	0	0.138484	3.53103e-06
Wang et al.,2024	Solirubrobacterales	Enterobacterales	Bacteira	Bacteira	-0.109603	0.0637002	0.410419	4.34763e-13
This work	Sphingomonadales	Enterobacterales	Bacteira	Bacteira	-0.0613849	0.0162282	0.388634	0
Wang et al.,2024	Sphingomonadales	Enterobacterales	Bacteira	Bacteira	0.108714	0.0658945	0.551378	0
This work	Acidobacteriales	Gaiellales	Bacteira	Bacteira	0.00219842	0.931462	0.0828511	0.00568005
Wang et al.,2024	Acidobacteriales	Gaiellales	Bacteira	Bacteira	0.513575	0	0.348865	1.2297e-09
This work	Micrococcales	Gaiellales	Bacteira	Bacteira	0.265103	0	0.594447	0
Wang et al.,2024	Micrococcales	Gaiellales	Bacteira	Bacteira	0.866803	0	0.667758	0
This work	Solirubrobacterales	Gaiellales	Bacteira	Bacteira	0.774083	0	0.854715	0
Wang et al.,2024	Solirubrobacterales	Gaiellales	Bacteira	Bacteira	0.893824	0	0.829017	0
This work	Sphingomonadales	Gaiellales	Bacteira	Bacteira	0.133182	1.66223e-07	0.50829	0
Wang et al.,2024	Sphingomonadales	Gaiellales	Bacteira	Bacteira	0.445136	2.22045e-15	0.622642	0
This work	Acidobacteriales	Pseudomonadales	Bacteira	Bacteira	-0.167866	3.73626e-11	0.0728001	0.015131
Wang et al.,2024	Acidobacteriales	Pseudomonadales	Bacteira	Bacteira	-0.25138	1.6365e-05	0.168625	0.00417331
This work	Bacillales	Pseudomonadales	Bacteira	Bacteira	-0.127515	5.47033e-07	0.320838	0
Wang et al.,2024	Bacillales	Pseudomonadales	Bacteira	Bacteira	-0.143496	0.0149758	0.360162	3.23334e-10
This work	Burkholderiales	Pseudomonadales	Bacteira	Bacteira	-0.162748	1.45784e-10	0.512147	0
Wang et al.,2024	Burkholderiales	Pseudomonadales	Bacteira	Bacteira	-0.0799371	0.176864	0.538391	0
This work	Enterobacterales	Pseudomonadales	Bacteira	Bacteira	0.410303	0	0.636997	0
Wang et al.,2024	Enterobacterales	Pseudomonadales	Bacteira	Bacteira	0.313886	5.56417e-08	0.579682	0
This work	Gaiellales	Pseudomonadales	Bacteira	Bacteira	-0.537841	0	0.12821	1.78517e-05
Wang et al.,2024	Gaiellales	Pseudomonadales	Bacteira	Bacteira	-0.268464	3.96561e-06	0.374035	5.82729e-11
This work	Micrococcales	Pseudomonadales	Bacteira	Bacteira	-0.276997	0	0.231018	5.9952e-15
Wang et al.,2024	Micrococcales	Pseudomonadales	Bacteira	Bacteira	-0.232702	6.8979e-05	0.150903	0.0104679
This work	Solirubrobacterales	Pseudomonadales	Bacteira	Bacteira	-0.511485	0	0.150544	4.52286e-07
Wang et al.,2024	Solirubrobacterales	Pseudomonadales	Bacteira	Bacteira	-0.221455	0.000155333	0.396712	2.95408e-12
This work	Sphingomonadales	Pseudomonadales	Bacteira	Bacteira	-0.150494	3.19356e-09	0.380521	0
Wang et al.,2024	Sphingomonadales	Pseudomonadales	Bacteira	Bacteira	0.019913	0.736939	0.597972	0
This work	Acidobacteriales	Rhizobiales	Bacteira	Bacteira	0.289218	0	0.285524	0
Wang et al.,2024	Acidobacteriales	Rhizobiales	Bacteira	Bacteira	0.0442251	0.455476	0.363092	2.26686e-10
This work	Bacillales	Rhizobiales	Bacteira	Bacteira	0.0131395	0.607209	0.606753	0
Wang et al.,2024	Bacillales	Rhizobiales	Bacteira	Bacteira	0.00316325	0.957449	0.313438	5.82512e-08
This work	Burkholderiales	Rhizobiales	Bacteira	Bacteira	0.105522	3.47695e-05	0.755033	0
Wang et al.,2024	Burkholderiales	Rhizobiales	Bacteira	Bacteira	0.597204	0	0.787876	0
This work	Enterobacterales	Rhizobiales	Bacteira	Bacteira	-0.506716	0	0.339854	0
Wang et al.,2024	Enterobacterales	Rhizobiales	Bacteira	Bacteira	0.341681	2.79865e-09	0.595038	0
This work	Gaiellales	Rhizobiales	Bacteira	Bacteira	0.492732	0	0.729382	0
Wang et al.,2024	Gaiellales	Rhizobiales	Bacteira	Bacteira	0.21331	0.000272732	0.614667	0
This work	Micrococcales	Rhizobiales	Bacteira	Bacteira	0.0821498	0.00128515	0.598841	0
Wang et al.,2024	Micrococcales	Rhizobiales	Bacteira	Bacteira	0.26079	7.58823e-06	0.391152	6.26876e-12
This work	Pseudomonadales	Rhizobiales	Bacteira	Bacteira	-0.516345	0	0.387259	0
Wang et al.,2024	Pseudomonadales	Rhizobiales	Bacteira	Bacteira	-0.0792257	0.180761	0.511723	0
This work	Solirubrobacterales	Rhizobiales	Bacteira	Bacteira	0.531885	0	0.76043	0
Wang et al.,2024	Solirubrobacterales	Rhizobiales	Bacteira	Bacteira	0.415028	2.23821e-13	0.763309	0
This work	Sphingomonadales	Rhizobiales	Bacteira	Bacteira	0.13221	2.04625e-07	0.614831	0
Wang et al.,2024	Sphingomonadales	Rhizobiales	Bacteira	Bacteira	0.632661	0	0.869499	0
This work	Micrococcales	Solirubrobacterales	Bacteira	Bacteira	0.253011	0	0.56015	0
Wang et al.,2024	Micrococcales	Solirubrobacterales	Bacteira	Bacteira	0.916175	0	0.747123	0
This work	Acidobacteriales	Sphingomonadales	Bacteira	Bacteira	-0.321334	0	-0.203372	7.44205e-12
Wang et al.,2024	Acidobacteriales	Sphingomonadales	Bacteira	Bacteira	0.39133	6.12088e-12	0.472317	0
This work	Micrococcales	Sphingomonadales	Bacteira	Bacteira	0.531516	0	0.74564	0
Wang et al.,2024	Micrococcales	Sphingomonadales	Bacteira	Bacteira	0.319485	3.12078e-08	0.244768	2.75908e-05
This work	Solirubrobacterales	Sphingomonadales	Bacteira	Bacteira	0.118361	3.37128e-06	0.47427	0
Wang et al.,2024	Solirubrobacterales	Sphingomonadales	Bacteira	Bacteira	0.499344	0	0.669785	0
This work	Agaricales	Acidobacteriales	Fungi	Bacteira	0.306835	0	0.409446	0
This work	Capnodiales	Acidobacteriales	Fungi	Bacteira	-0.134089	1.36741e-07	0.112418	0.000171174
This work	Chaetothyriales	Acidobacteriales	Fungi	Bacteira	0.226489	0	0.305191	0
This work	Helotiales	Acidobacteriales	Fungi	Bacteira	0.279864	0	0.378731	0
This work	Hypocreales	Acidobacteriales	Fungi	Bacteira	-0.293098	0	0.140849	2.39088e-06
This work	Mortierellales	Acidobacteriales	Fungi	Bacteira	0.24146	0	0.421667	0
This work	Pleosporales	Acidobacteriales	Fungi	Bacteira	-0.437984	0	-0.0444799	0.138077
This work	Sordariales	Acidobacteriales	Fungi	Bacteira	0.0619738	0.0152306	0.228198	1.28786e-14
This work	Tremellales	Acidobacteriales	Fungi	Bacteira	0.477651	0	0.521442	0
This work	Xylariales	Acidobacteriales	Fungi	Bacteira	-0.00583106	0.819551	0.224578	3.41949e-14
This work	Agaricales	Bacillales	Fungi	Bacteira	-0.00959024	0.707516	0.219434	1.33227e-13
This work	Capnodiales	Bacillales	Fungi	Bacteira	-0.0350868	0.16973	0.228537	1.17684e-14
This work	Chaetothyriales	Bacillales	Fungi	Bacteira	-0.179355	1.50413e-12	0.110384	0.000224492
This work	Helotiales	Bacillales	Fungi	Bacteira	-0.0714184	0.00514879	0.141334	2.20566e-06
This work	Hypocreales	Bacillales	Fungi	Bacteira	0.196633	7.99361e-15	0.402418	0
This work	Mortierellales	Bacillales	Fungi	Bacteira	0.0963876	0.000157054	0.319383	0
This work	Pleosporales	Bacillales	Fungi	Bacteira	0.0791293	0.00193177	0.335022	0
This work	Sordariales	Bacillales	Fungi	Bacteira	0.0786805	0.00205002	0.314788	0
This work	Tremellales	Bacillales	Fungi	Bacteira	-0.170713	1.72007e-11	0.0629637	0.0357027
This work	Xylariales	Bacillales	Fungi	Bacteira	0.100636	7.91194e-05	0.302457	0
This work	Agaricales	Burkholderiales	Fungi	Bacteira	0.000155058	0.99516	0.332504	0
This work	Capnodiales	Burkholderiales	Fungi	Bacteira	-0.000398589	0.987559	0.352056	0
This work	Chaetothyriales	Burkholderiales	Fungi	Bacteira	-0.0454731	0.075092	0.231368	5.32907e-15
This work	Helotiales	Burkholderiales	Fungi	Bacteira	-0.0808542	0.00153315	0.216628	2.75335e-13
This work	Hypocreales	Burkholderiales	Fungi	Bacteira	-0.0303912	0.234351	0.473823	0
This work	Mortierellales	Burkholderiales	Fungi	Bacteira	-0.11045	1.46259e-05	0.343858	0
This work	Pleosporales	Burkholderiales	Fungi	Bacteira	0.115694	5.58864e-06	0.427916	0
This work	Sordariales	Burkholderiales	Fungi	Bacteira	0.0172091	0.500758	0.380998	0
This work	Tremellales	Burkholderiales	Fungi	Bacteira	-0.00736818	0.773148	0.190275	1.56088e-10
This work	Xylariales	Burkholderiales	Fungi	Bacteira	-0.0767503	0.00263812	0.39485	0
This work	Agaricales	Enterobacterales	Fungi	Bacteira	-0.121801	1.7281e-06	0.0831371	0.00551543
This work	Capnodiales	Enterobacterales	Fungi	Bacteira	0.085726	0.000779633	0.16764	1.84091e-08
This work	Chaetothyriales	Enterobacterales	Fungi	Bacteira	0.00118796	0.962932	0.116167	0.00010262
This work	Helotiales	Enterobacterales	Fungi	Bacteira	-0.166129	5.95948e-11	0.0267963	0.37179
This work	Hypocreales	Enterobacterales	Fungi	Bacteira	0.157476	5.66648e-10	0.243771	0
This work	Mortierellales	Enterobacterales	Fungi	Bacteira	-0.233249	0	0.0154819	0.605888
This work	Pleosporales	Enterobacterales	Fungi	Bacteira	0.115575	5.71449e-06	0.203767	6.76681e-12
This work	Sordariales	Enterobacterales	Fungi	Bacteira	-0.111627	1.18293e-05	0.10246	0.000618391
This work	Tremellales	Enterobacterales	Fungi	Bacteira	0.0791355	0.00193016	0.10936	0.000256887
This work	Xylariales	Enterobacterales	Fungi	Bacteira	-0.135901	9.22012e-08	0.107767	0.000316079
This work	Agaricales	Gaiellales	Fungi	Bacteira	-0.0355929	0.163652	0.272339	0
This work	Capnodiales	Gaiellales	Fungi	Bacteira	-0.0475166	0.0628889	0.312052	0
This work	Chaetothyriales	Gaiellales	Fungi	Bacteira	-0.0260495	0.308075	0.261241	0
This work	Helotiales	Gaiellales	Fungi	Bacteira	0.0801359	0.00168892	0.300288	0
This work	Hypocreales	Gaiellales	Fungi	Bacteira	0.0994394	9.62329e-05	0.48179	0
This work	Mortierellales	Gaiellales	Fungi	Bacteira	0.148855	4.73917e-09	0.45416	0
This work	Pleosporales	Gaiellales	Fungi	Bacteira	0.110948	1.33721e-05	0.43301	0
This work	Sordariales	Gaiellales	Fungi	Bacteira	0.0446741	0.0803611	0.37593	0
This work	Tremellales	Gaiellales	Fungi	Bacteira	-0.299269	0	0.0292173	0.330131
This work	Xylariales	Gaiellales	Fungi	Bacteira	0.15829	4.60882e-10	0.441695	0
This work	Agaricales	Micrococcales	Fungi	Bacteira	-0.351763	0	0.130589	1.2397e-05
This work	Capnodiales	Micrococcales	Fungi	Bacteira	0.151656	2.40795e-09	0.395673	0
This work	Chaetothyriales	Micrococcales	Fungi	Bacteira	-0.132888	1.77036e-07	0.237735	8.88178e-16
This work	Helotiales	Micrococcales	Fungi	Bacteira	-0.211938	0	0.159638	8.59436e-08
This work	Hypocreales	Micrococcales	Fungi	Bacteira	0.163617	1.16023e-10	0.525683	0
This work	Mortierellales	Micrococcales	Fungi	Bacteira	-0.339448	0	0.169234	1.34217e-08
This work	Pleosporales	Micrococcales	Fungi	Bacteira	0.37176	0	0.56266	0
This work	Sordariales	Micrococcales	Fungi	Bacteira	-0.104693	4.00715e-05	0.346028	0
This work	Tremellales	Micrococcales	Fungi	Bacteira	-0.208695	0	0.0627816	0.0362413
This work	Xylariales	Micrococcales	Fungi	Bacteira	-0.11363	8.20248e-06	0.342795	0
This work	Agaricales	Pseudomonadales	Fungi	Bacteira	0.0865793	0.000690064	0.135449	5.76988e-06
This work	Capnodiales	Pseudomonadales	Fungi	Bacteira	0.053043	0.0378396	0.127394	2.01985e-05
This work	Chaetothyriales	Pseudomonadales	Fungi	Bacteira	-0.0361702	0.156922	0.0256857	0.391945
This work	Helotiales	Pseudomonadales	Fungi	Bacteira	-0.0441032	0.0843065	0.0488528	0.103323
This work	Hypocreales	Pseudomonadales	Fungi	Bacteira	-0.0017698	0.944801	0.147196	8.13579e-07
This work	Mortierellales	Pseudomonadales	Fungi	Bacteira	0.00547803	0.830304	0.1427	1.75436e-06
This work	Pleosporales	Pseudomonadales	Fungi	Bacteira	-0.0303443	0.235073	0.116616	9.64115e-05
This work	Sordariales	Pseudomonadales	Fungi	Bacteira	0.000468794	0.985368	0.10418	0.000499194
This work	Tremellales	Pseudomonadales	Fungi	Bacteira	0.0469439	0.0661309	0.0551864	0.0657031
This work	Xylariales	Pseudomonadales	Fungi	Bacteira	0.01032	0.686399	0.132134	9.7496e-06
This work	Agaricales	Rhizobiales	Fungi	Bacteira	0.101774	6.5535e-05	0.408141	0
This work	Capnodiales	Rhizobiales	Fungi	Bacteira	-0.0423124	0.0977073	0.384825	0
This work	Chaetothyriales	Rhizobiales	Fungi	Bacteira	-0.0181762	0.476998	0.286727	0
This work	Helotiales	Rhizobiales	Fungi	Bacteira	0.141824	2.4528e-08	0.354868	0
This work	Hypocreales	Rhizobiales	Fungi	Bacteira	-0.0238575	0.350573	0.529489	0
This work	Mortierellales	Rhizobiales	Fungi	Bacteira	0.218611	0	0.528028	0
This work	Pleosporales	Rhizobiales	Fungi	Bacteira	-0.121071	1.99424e-06	0.418488	0
This work	Sordariales	Rhizobiales	Fungi	Bacteira	0.00790044	0.757258	0.414065	0
This work	Tremellales	Rhizobiales	Fungi	Bacteira	-0.090846	0.000368872	0.196856	3.47242e-11
This work	Xylariales	Rhizobiales	Fungi	Bacteira	0.190875	4.81837e-14	0.510308	0
This work	Agaricales	Solirubrobacterales	Fungi	Bacteira	-0.0285222	0.264395	0.369606	0
This work	Capnodiales	Solirubrobacterales	Fungi	Bacteira	0.0250085	0.327814	0.416872	0
This work	Chaetothyriales	Solirubrobacterales	Fungi	Bacteira	0.0970991	0.00014028	0.428466	0
This work	Helotiales	Solirubrobacterales	Fungi	Bacteira	0.125357	8.4971e-07	0.413953	0
This work	Hypocreales	Solirubrobacterales	Fungi	Bacteira	-0.0476508	0.0621487	0.515375	0
This work	Mortierellales	Solirubrobacterales	Fungi	Bacteira	0.0366564	0.151418	0.465408	0
This work	Pleosporales	Solirubrobacterales	Fungi	Bacteira	0.0359511	0.159452	0.446855	0
This work	Sordariales	Solirubrobacterales	Fungi	Bacteira	-0.0170534	0.504641	0.437922	0
This work	Tremellales	Solirubrobacterales	Fungi	Bacteira	-0.142833	1.94686e-08	0.190391	1.52085e-10
This work	Xylariales	Solirubrobacterales	Fungi	Bacteira	0.0450447	0.0778812	0.486017	0
This work	Agaricales	Sphingomonadales	Fungi	Bacteira	-0.218564	0	0.14393	1.42508e-06
This work	Capnodiales	Sphingomonadales	Fungi	Bacteira	0.118525	3.26679e-06	0.324974	0
This work	Chaetothyriales	Sphingomonadales	Fungi	Bacteira	0.00132531	0.95865	0.166854	2.14879e-08
This work	Helotiales	Sphingomonadales	Fungi	Bacteira	-0.224828	0	0.0743573	0.0130892
This work	Hypocreales	Sphingomonadales	Fungi	Bacteira	0.0760147	0.00290015	0.419097	0
This work	Mortierellales	Sphingomonadales	Fungi	Bacteira	-0.292608	0	0.122728	4.03701e-05
This work	Pleosporales	Sphingomonadales	Fungi	Bacteira	0.382341	0	0.493939	0
This work	Sordariales	Sphingomonadales	Fungi	Bacteira	-0.0297166	0.244904	0.273796	0
This work	Tremellales	Sphingomonadales	Fungi	Bacteira	-0.245477	0	-0.0382715	0.202014
This work	Xylariales	Sphingomonadales	Fungi	Bacteira	-0.132836	1.79016e-07	0.286253	0
This work	Centramoebida	Acidobacteriales	Protist	Bacteira	-0.0600497	0.0187047	0.114814	0.000123649
This work	Cercomonadida	Acidobacteriales	Protist	Bacteira	0.0249379	0.329182	0.212703	7.47846e-13
This work	Colpodea_X	Acidobacteriales	Protist	Bacteira	-0.353028	0	-0.00734456	0.806647
This work	Cryomonadida	Acidobacteriales	Protist	Bacteira	0.238807	0	0.289727	0
This work	Euglyphida	Acidobacteriales	Protist	Bacteira	0.228324	0	0.288844	0
This work	Eugregarinorida	Acidobacteriales	Protist	Bacteira	0.170783	1.68727e-11	0.294331	0
This work	Glissomonadida	Acidobacteriales	Protist	Bacteira	0.209172	0	0.328584	0
This work	Hypotrichia	Acidobacteriales	Protist	Bacteira	-0.0842158	0.000965046	0.0410554	0.171089
This work	Petalomonadida	Acidobacteriales	Protist	Bacteira	-0.311621	0	-0.0700174	0.0194841
This work	Sphaeropleales	Acidobacteriales	Protist	Bacteira	-0.283865	0	-0.258823	0
This work	Centramoebida	Bacillales	Protist	Bacteira	0.0692059	0.00671423	0.393508	0
This work	Cercomonadida	Bacillales	Protist	Bacteira	0.213092	0	0.468822	0
This work	Colpodea_X	Bacillales	Protist	Bacteira	0.0756815	0.00302648	0.396606	0
This work	Cryomonadida	Bacillales	Protist	Bacteira	-0.239495	0	0.232521	3.9968e-15
This work	Euglyphida	Bacillales	Protist	Bacteira	-0.0179459	0.482599	0.330793	0
This work	Eugregarinorida	Bacillales	Protist	Bacteira	-0.139704	3.96528e-08	0.219006	1.48992e-13
This work	Glissomonadida	Bacillales	Protist	Bacteira	0.135418	1.02451e-07	0.424134	0
This work	Hypotrichia	Bacillales	Protist	Bacteira	0.073351	0.00405975	0.337284	0
This work	Petalomonadida	Bacillales	Protist	Bacteira	0.0526004	0.0394714	0.352348	0
This work	Sphaeropleales	Bacillales	Protist	Bacteira	-0.0670108	0.0086771	0.114332	0.000132074
This work	Centramoebida	Burkholderiales	Protist	Bacteira	-0.111439	1.22371e-05	0.433115	0
This work	Cercomonadida	Burkholderiales	Protist	Bacteira	-0.155054	1.04146e-09	0.478021	0
This work	Colpodea_X	Burkholderiales	Protist	Bacteira	0.0503676	0.0486424	0.496923	0
This work	Cryomonadida	Burkholderiales	Protist	Bacteira	0.123296	1.28537e-06	0.418217	0
This work	Euglyphida	Burkholderiales	Protist	Bacteira	-0.0930903	0.000262474	0.426964	0
This work	Eugregarinorida	Burkholderiales	Protist	Bacteira	-0.163722	1.12872e-10	0.335789	0
This work	Glissomonadida	Burkholderiales	Protist	Bacteira	-0.0669663	0.00872174	0.487121	0
This work	Hypotrichia	Burkholderiales	Protist	Bacteira	0.15315	1.66987e-09	0.441873	0
This work	Petalomonadida	Burkholderiales	Protist	Bacteira	-0.0150895	0.554951	0.421436	0
This work	Sphaeropleales	Burkholderiales	Protist	Bacteira	0.169474	2.41469e-11	0.206342	3.62421e-12
This work	Centramoebida	Enterobacterales	Protist	Bacteira	-0.123225	1.30359e-06	0.140606	2.48957e-06
This work	Cercomonadida	Enterobacterales	Protist	Bacteira	-0.156106	8.00483e-10	0.134001	7.26697e-06
This work	Colpodea_X	Enterobacterales	Protist	Bacteira	0.0143075	0.575643	0.180134	1.42717e-09
This work	Cryomonadida	Enterobacterales	Protist	Bacteira	-0.0822104	0.00127451	0.1117	0.000188469
This work	Euglyphida	Enterobacterales	Protist	Bacteira	-0.149444	4.11375e-09	0.116046	0.000104355
This work	Eugregarinorida	Enterobacterales	Protist	Bacteira	0.0204881	0.422779	0.151028	4.15027e-07
This work	Glissomonadida	Enterobacterales	Protist	Bacteira	-0.046018	0.0716634	0.163511	4.11528e-08
This work	Hypotrichia	Enterobacterales	Protist	Bacteira	-0.0694334	0.0065355	0.0984784	0.0010029
This work	Petalomonadida	Enterobacterales	Protist	Bacteira	-0.145671	1.0074e-08	0.0923272	0.00204708
This work	Sphaeropleales	Enterobacterales	Protist	Bacteira	0.0885111	0.000521412	0.0979526	0.00106767
This work	Centramoebida	Gaiellales	Protist	Bacteira	0.1652	7.63312e-11	0.535836	0
This work	Cercomonadida	Gaiellales	Protist	Bacteira	0.27416	0	0.592238	0
This work	Colpodea_X	Gaiellales	Protist	Bacteira	0.0756439	0.00304104	0.516577	0
This work	Cryomonadida	Gaiellales	Protist	Bacteira	-0.0955035	0.000180527	0.376448	0
This work	Euglyphida	Gaiellales	Protist	Bacteira	-0.00591858	0.81689	0.430853	0
This work	Eugregarinorida	Gaiellales	Protist	Bacteira	-0.0799101	0.00174082	0.347506	0
This work	Glissomonadida	Gaiellales	Protist	Bacteira	0.0628593	0.0138322	0.488966	0
This work	Hypotrichia	Gaiellales	Protist	Bacteira	0.0331981	0.193902	0.403957	0
This work	Petalomonadida	Gaiellales	Protist	Bacteira	0.19731	6.43929e-15	0.536059	0
This work	Sphaeropleales	Gaiellales	Protist	Bacteira	0.0391496	0.125477	0.235118	1.77636e-15
This work	Centramoebida	Micrococcales	Protist	Bacteira	-0.0823435	0.00125142	0.430802	0
This work	Cercomonadida	Micrococcales	Protist	Bacteira	0.0101582	0.69106	0.488338	0
This work	Colpodea_X	Micrococcales	Protist	Bacteira	0.235357	0	0.534382	0
This work	Cryomonadida	Micrococcales	Protist	Bacteira	0.0205677	0.420977	0.382786	0
This work	Euglyphida	Micrococcales	Protist	Bacteira	-0.197191	6.66134e-15	0.336118	0
This work	Eugregarinorida	Micrococcales	Protist	Bacteira	-0.156658	6.96779e-10	0.272689	0
This work	Glissomonadida	Micrococcales	Protist	Bacteira	-0.160226	2.80697e-10	0.363875	0
This work	Hypotrichia	Micrococcales	Protist	Bacteira	0.0972839	0.000136208	0.417251	0
This work	Petalomonadida	Micrococcales	Protist	Bacteira	0.156727	6.84665e-10	0.490439	0
This work	Sphaeropleales	Micrococcales	Protist	Bacteira	0.382696	0	0.465525	0
This work	Centramoebida	Pseudomonadales	Protist	Bacteira	-0.050195	0.0494201	0.161409	6.15097e-08
This work	Cercomonadida	Pseudomonadales	Protist	Bacteira	-0.14392	1.51479e-08	0.133422	7.96395e-06
This work	Colpodea_X	Pseudomonadales	Protist	Bacteira	0.0276852	0.278677	0.180486	1.32427e-09
This work	Cryomonadida	Pseudomonadales	Protist	Bacteira	-0.0904213	0.000393076	0.0939137	0.00170961
This work	Euglyphida	Pseudomonadales	Protist	Bacteira	0.0148348	0.561651	0.16169	5.83103e-08
This work	Eugregarinorida	Pseudomonadales	Protist	Bacteira	0.0252293	0.32356	0.135717	5.52725e-06
This work	Glissomonadida	Pseudomonadales	Protist	Bacteira	0.0441852	0.0837302	0.193554	7.42986e-11
This work	Hypotrichia	Pseudomonadales	Protist	Bacteira	-0.00714551	0.779825	0.138708	3.40434e-06
This work	Petalomonadida	Pseudomonadales	Protist	Bacteira	-0.107518	2.45906e-05	0.0856112	0.00426091
This work	Sphaeropleales	Pseudomonadales	Protist	Bacteira	-0.0897776	0.000432601	-0.0524183	0.0804644
This work	Centramoebida	Rhizobiales	Protist	Bacteira	0.0371613	0.14586	0.556766	0
This work	Cercomonadida	Rhizobiales	Protist	Bacteira	0.147623	6.35613e-09	0.61615	0
This work	Colpodea_X	Rhizobiales	Protist	Bacteira	0.00695137	0.785659	0.552234	0
This work	Cryomonadida	Rhizobiales	Protist	Bacteira	-0.0442364	0.0833723	0.455083	0
This work	Euglyphida	Rhizobiales	Protist	Bacteira	0.130094	3.20098e-07	0.549064	0
This work	Eugregarinorida	Rhizobiales	Protist	Bacteira	0.0115931	0.650149	0.465568	0
This work	Glissomonadida	Rhizobiales	Protist	Bacteira	0.0207249	0.417434	0.55879	0
This work	Hypotrichia	Rhizobiales	Protist	Bacteira	0.0156887	0.539344	0.450012	0
This work	Petalomonadida	Rhizobiales	Protist	Bacteira	0.114428	7.07709e-06	0.530513	0
This work	Sphaeropleales	Rhizobiales	Protist	Bacteira	-0.141163	2.85095e-08	0.11063	0.000217288
This work	Centramoebida	Solirubrobacterales	Protist	Bacteira	0.104349	4.2492e-05	0.529479	0
This work	Cercomonadida	Solirubrobacterales	Protist	Bacteira	0.22882	0	0.586833	0
This work	Colpodea_X	Solirubrobacterales	Protist	Bacteira	-0.00580672	0.820291	0.474478	0
This work	Cryomonadida	Solirubrobacterales	Protist	Bacteira	0.0455062	0.07488	0.462584	0
This work	Euglyphida	Solirubrobacterales	Protist	Bacteira	0.0652654	0.010588	0.477101	0
This work	Eugregarinorida	Solirubrobacterales	Protist	Bacteira	0.0166512	0.514744	0.418918	0
This work	Glissomonadida	Solirubrobacterales	Protist	Bacteira	0.0398945	0.118439	0.49827	0
This work	Hypotrichia	Solirubrobacterales	Protist	Bacteira	-0.0731625	0.00415593	0.342095	0
This work	Petalomonadida	Solirubrobacterales	Protist	Bacteira	0.162801	1.43763e-10	0.525708	0
This work	Sphaeropleales	Solirubrobacterales	Protist	Bacteira	0.05013	0.0497159	0.234741	2.22045e-15
This work	Centramoebida	Sphingomonadales	Protist	Bacteira	0.00435946	0.864578	0.386793	0
This work	Cercomonadida	Sphingomonadales	Protist	Bacteira	-0.130598	2.87913e-07	0.369758	0
This work	Colpodea_X	Sphingomonadales	Protist	Bacteira	0.26137	0	0.490809	0
This work	Cryomonadida	Sphingomonadales	Protist	Bacteira	0.11136	1.24149e-05	0.333653	0
This work	Euglyphida	Sphingomonadales	Protist	Bacteira	-0.187185	1.4877e-13	0.286357	0
This work	Eugregarinorida	Sphingomonadales	Protist	Bacteira	-0.205402	4.44089e-16	0.205511	4.43734e-12
This work	Glissomonadida	Sphingomonadales	Protist	Bacteira	-0.277969	0	0.271465	0
This work	Hypotrichia	Sphingomonadales	Protist	Bacteira	0.0950338	0.000194304	0.377995	0
This work	Petalomonadida	Sphingomonadales	Protist	Bacteira	0.238535	0	0.469095	0
This work	Sphaeropleales	Sphingomonadales	Protist	Bacteira	0.428625	0	0.40264	0
This work	Mortierellales	Agaricales	Fungi	Fungi	0.391057	0	0.583075	0
This work	Sordariales	Agaricales	Fungi	Fungi	0.202525	1.33227e-15	0.53463	0
This work	Agaricales	Capnodiales	Fungi	Fungi	-0.0846614	0.000906482	0.484341	0
This work	Chaetothyriales	Capnodiales	Fungi	Fungi	0.0477695	0.0614994	0.59102	0
This work	Helotiales	Capnodiales	Fungi	Fungi	-0.154571	1.17461e-09	0.472386	0
This work	Mortierellales	Capnodiales	Fungi	Fungi	-0.166575	5.28773e-11	0.358894	0
This work	Sordariales	Capnodiales	Fungi	Fungi	-0.083224	0.00110819	0.555325	0
This work	Tremellales	Capnodiales	Fungi	Fungi	0.149575	3.98632e-09	0.530162	0
This work	Xylariales	Capnodiales	Fungi	Fungi	0.0491905	0.0541573	0.636219	0
This work	Agaricales	Chaetothyriales	Fungi	Fungi	0.183616	4.32321e-13	0.548699	0
This work	Mortierellales	Chaetothyriales	Fungi	Fungi	0.0671554	0.00853359	0.390851	0
This work	Sordariales	Chaetothyriales	Fungi	Fungi	0.149305	4.254e-09	0.555937	0
This work	Tremellales	Chaetothyriales	Fungi	Fungi	0.226883	0	0.560247	0
This work	Xylariales	Chaetothyriales	Fungi	Fungi	-0.0475264	0.0628347	0.536359	0
This work	Agaricales	Helotiales	Fungi	Fungi	0.158888	3.95684e-10	0.533682	0
This work	Chaetothyriales	Helotiales	Fungi	Fungi	0.166544	5.33307e-11	0.588468	0
This work	Mortierellales	Helotiales	Fungi	Fungi	0.203015	8.88178e-16	0.515365	0
This work	Sordariales	Helotiales	Fungi	Fungi	-0.00284523	0.91137	0.48225	0
This work	Tremellales	Helotiales	Fungi	Fungi	0.124329	1.04536e-06	0.500233	0
This work	Xylariales	Helotiales	Fungi	Fungi	0.0917659	0.00032114	0.547282	0
This work	Agaricales	Hypocreales	Fungi	Fungi	-0.132192	2.05414e-07	0.536834	0
This work	Capnodiales	Hypocreales	Fungi	Fungi	-0.00293568	0.908565	0.703431	0
This work	Chaetothyriales	Hypocreales	Fungi	Fungi	-0.202384	1.33227e-15	0.568897	0
This work	Helotiales	Hypocreales	Fungi	Fungi	-0.216233	0	0.531796	0
This work	Mortierellales	Hypocreales	Fungi	Fungi	0.0811544	0.00147206	0.529396	0
This work	Sordariales	Hypocreales	Fungi	Fungi	0.0201031	0.431549	0.658021	0
This work	Tremellales	Hypocreales	Fungi	Fungi	-0.219143	0	0.456022	0
This work	Xylariales	Hypocreales	Fungi	Fungi	0.0651196	0.0107634	0.689776	0
This work	Agaricales	Pleosporales	Fungi	Fungi	-0.294923	0	0.415996	0
This work	Capnodiales	Pleosporales	Fungi	Fungi	0.132323	1.99758e-07	0.724226	0
This work	Chaetothyriales	Pleosporales	Fungi	Fungi	-0.127039	6.03167e-07	0.544066	0
This work	Helotiales	Pleosporales	Fungi	Fungi	-0.340283	0	0.401944	0
This work	Hypocreales	Pleosporales	Fungi	Fungi	0.176225	3.68772e-12	0.793488	0
This work	Mortierellales	Pleosporales	Fungi	Fungi	-0.330184	0	0.312324	0
This work	Sordariales	Pleosporales	Fungi	Fungi	-0.0578462	0.0235169	0.583309	0
This work	Tremellales	Pleosporales	Fungi	Fungi	-0.2774	0	0.343614	0
This work	Xylariales	Pleosporales	Fungi	Fungi	0.00639291	0.802507	0.647938	0
This work	Mortierellales	Sordariales	Fungi	Fungi	0.272302	0	0.516183	0
This work	Agaricales	Tremellales	Fungi	Fungi	0.139462	4.18648e-08	0.487601	0
This work	Mortierellales	Tremellales	Fungi	Fungi	0.0864195	0.000706078	0.398784	0
This work	Sordariales	Tremellales	Fungi	Fungi	-0.0385151	0.131726	0.412059	0
This work	Xylariales	Tremellales	Fungi	Fungi	-0.175279	4.82014e-12	0.390388	0
This work	Agaricales	Xylariales	Fungi	Fungi	0.264152	0	0.611529	0
This work	Mortierellales	Xylariales	Fungi	Fungi	0.280379	0	0.551715	0
This work	Sordariales	Xylariales	Fungi	Fungi	0.124577	9.94457e-07	0.574837	0
This work	Centramoebida	Agaricales	Protist	Fungi	-0.0451576	0.077138	0.437653	0
This work	Cercomonadida	Agaricales	Protist	Fungi	0.0183089	0.473785	0.565271	0
This work	Colpodea_X	Agaricales	Protist	Fungi	-0.121207	1.94183e-06	0.462832	0
This work	Cryomonadida	Agaricales	Protist	Fungi	-0.0160284	0.530595	0.578926	0
This work	Euglyphida	Agaricales	Protist	Fungi	0.227339	0	0.6377	0
This work	Eugregarinorida	Agaricales	Protist	Fungi	0.101407	6.96539e-05	0.507391	0
This work	Glissomonadida	Agaricales	Protist	Fungi	0.0808582	0.00153232	0.560264	0
This work	Hypotrichia	Agaricales	Protist	Fungi	0.0565015	0.0269529	0.443923	0
This work	Petalomonadida	Agaricales	Protist	Fungi	-0.108053	2.23881e-05	0.412905	0
This work	Sphaeropleales	Agaricales	Protist	Fungi	-0.329575	0	0.0378371	0.207186
This work	Centramoebida	Capnodiales	Protist	Fungi	-0.0863422	0.000713949	0.565188	0
This work	Cercomonadida	Capnodiales	Protist	Fungi	-0.0961511	0.000163037	0.621496	0
This work	Colpodea_X	Capnodiales	Protist	Fungi	0.00619818	0.808404	0.598358	0
This work	Cryomonadida	Capnodiales	Protist	Fungi	0.0199793	0.434391	0.660788	0
This work	Euglyphida	Capnodiales	Protist	Fungi	-0.0563966	0.0272385	0.600286	0
This work	Eugregarinorida	Capnodiales	Protist	Fungi	0.0372922	0.144445	0.523554	0
This work	Glissomonadida	Capnodiales	Protist	Fungi	-0.0573614	0.0247093	0.593419	0
This work	Hypotrichia	Capnodiales	Protist	Fungi	-0.0658591	0.00989967	0.446036	0
This work	Petalomonadida	Capnodiales	Protist	Fungi	0.0230151	0.36785	0.558975	0
This work	Sphaeropleales	Capnodiales	Protist	Fungi	0.17058	1.78395e-11	0.448538	0
This work	Centramoebida	Chaetothyriales	Protist	Fungi	0.0273239	0.285	0.473048	0
This work	Cercomonadida	Chaetothyriales	Protist	Fungi	-0.0890464	0.000481984	0.544724	0
This work	Colpodea_X	Chaetothyriales	Protist	Fungi	-0.157886	5.10659e-10	0.43694	0
This work	Cryomonadida	Chaetothyriales	Protist	Fungi	0.208653	0	0.675653	0
This work	Euglyphida	Chaetothyriales	Protist	Fungi	0.0497022	0.0516988	0.569741	0
This work	Eugregarinorida	Chaetothyriales	Protist	Fungi	0.039045	0.126491	0.479253	0
This work	Glissomonadida	Chaetothyriales	Protist	Fungi	-0.0118461	0.643039	0.528238	0
This work	Hypotrichia	Chaetothyriales	Protist	Fungi	-0.0596344	0.0195397	0.353425	0
This work	Petalomonadida	Chaetothyriales	Protist	Fungi	-0.0267829	0.294649	0.437599	0
This work	Sphaeropleales	Chaetothyriales	Protist	Fungi	0.0691158	0.00678617	0.336744	0
This work	Centramoebida	Helotiales	Protist	Fungi	0.0114285	0.65479	0.481464	0
This work	Cercomonadida	Helotiales	Protist	Fungi	0.0583011	0.0224436	0.580218	0
This work	Colpodea_X	Helotiales	Protist	Fungi	-0.22298	0	0.421603	0
This work	Cryomonadida	Helotiales	Protist	Fungi	-0.0215476	0.399187	0.579588	0
This work	Euglyphida	Helotiales	Protist	Fungi	0.158434	4.44219e-10	0.602589	0
This work	Eugregarinorida	Helotiales	Protist	Fungi	0.166961	4.76803e-11	0.533998	0
This work	Glissomonadida	Helotiales	Protist	Fungi	0.120939	2.04641e-06	0.581311	0
This work	Hypotrichia	Helotiales	Protist	Fungi	-0.100591	7.97067e-05	0.376974	0
This work	Petalomonadida	Helotiales	Protist	Fungi	-0.0557978	0.0289181	0.424938	0
This work	Sphaeropleales	Helotiales	Protist	Fungi	-0.178133	2.13918e-12	0.178015	2.23091e-09
This work	Centramoebida	Hypocreales	Protist	Fungi	0.0382021	0.134896	0.73178	0
This work	Cercomonadida	Hypocreales	Protist	Fungi	0.0421595	0.0989265	0.800755	0
This work	Colpodea_X	Hypocreales	Protist	Fungi	0.176907	3.03779e-12	0.761603	0
This work	Cryomonadida	Hypocreales	Protist	Fungi	-0.218002	0	0.743265	0
This work	Euglyphida	Hypocreales	Protist	Fungi	-0.0614113	0.0161822	0.73064	0
This work	Eugregarinorida	Hypocreales	Protist	Fungi	-0.0528682	0.038477	0.613888	0
This work	Glissomonadida	Hypocreales	Protist	Fungi	-0.0132965	0.602922	0.732115	0
This work	Hypotrichia	Hypocreales	Protist	Fungi	-0.0176798	0.489117	0.594208	0
This work	Petalomonadida	Hypocreales	Protist	Fungi	0.113364	8.61386e-06	0.693084	0
This work	Sphaeropleales	Hypocreales	Protist	Fungi	0.0632962	0.0131849	0.465744	0
This work	Centramoebida	Mortierellales	Protist	Fungi	0.0655044	0.0103059	0.512261	0
This work	Cercomonadida	Mortierellales	Protist	Fungi	0.124676	9.74981e-07	0.619832	0
This work	Colpodea_X	Mortierellales	Protist	Fungi	-0.0906002	0.000382704	0.47791	0
This work	Cryomonadida	Mortierellales	Protist	Fungi	-0.137218	6.90172e-08	0.509238	0
This work	Euglyphida	Mortierellales	Protist	Fungi	0.151829	2.30861e-09	0.612384	0
This work	Eugregarinorida	Mortierellales	Protist	Fungi	0.0605934	0.017659	0.486236	0
This work	Glissomonadida	Mortierellales	Protist	Fungi	0.159178	3.67402e-10	0.629633	0
This work	Hypotrichia	Mortierellales	Protist	Fungi	0.0255127	0.318153	0.430297	0
This work	Petalomonadida	Mortierellales	Protist	Fungi	0.00303319	0.905542	0.454137	0
This work	Sphaeropleales	Mortierellales	Protist	Fungi	-0.358185	0	0.00559585	0.85207
This work	Centramoebida	Pleosporales	Protist	Fungi	-0.0156707	0.539809	0.646176	0
This work	Cercomonadida	Pleosporales	Protist	Fungi	-0.0868549	0.000663247	0.687934	0
This work	Colpodea_X	Pleosporales	Protist	Fungi	0.278954	0	0.722419	0
This work	Cryomonadida	Pleosporales	Protist	Fungi	-0.00390613	0.878545	0.690879	0
This work	Euglyphida	Pleosporales	Protist	Fungi	-0.180308	1.14131e-12	0.597233	0
This work	Eugregarinorida	Pleosporales	Protist	Fungi	-0.132063	2.1112e-07	0.492294	0
This work	Glissomonadida	Pleosporales	Protist	Fungi	-0.193346	2.24265e-14	0.599255	0
This work	Hypotrichia	Pleosporales	Protist	Fungi	0.0536759	0.0356058	0.552377	0
This work	Petalomonadida	Pleosporales	Protist	Fungi	0.193295	2.26485e-14	0.663913	0
This work	Sphaeropleales	Pleosporales	Protist	Fungi	0.395658	0	0.610729	0
This work	Centramoebida	Sordariales	Protist	Fungi	0.170454	1.84663e-11	0.607484	0
This work	Cercomonadida	Sordariales	Protist	Fungi	0.0694157	0.00654924	0.669893	0
This work	Colpodea_X	Sordariales	Protist	Fungi	0.0191038	0.454797	0.593599	0
This work	Cryomonadida	Sordariales	Protist	Fungi	0.0326762	0.201007	0.662406	0
This work	Euglyphida	Sordariales	Protist	Fungi	0.0691086	0.00679193	0.639314	0
This work	Eugregarinorida	Sordariales	Protist	Fungi	-0.121442	1.85448e-06	0.443071	0
This work	Glissomonadida	Sordariales	Protist	Fungi	0.0485231	0.0575092	0.626469	0
This work	Hypotrichia	Sordariales	Protist	Fungi	0.112407	1.02649e-05	0.51747	0
This work	Petalomonadida	Sordariales	Protist	Fungi	0.0433161	0.0900013	0.553041	0
This work	Sphaeropleales	Sordariales	Protist	Fungi	0.00385564	0.880102	0.305255	0
This work	Centramoebida	Tremellales	Protist	Fungi	-0.173174	8.70126e-12	0.283233	0
This work	Cercomonadida	Tremellales	Protist	Fungi	-0.084938	0.000871813	0.409138	0
This work	Colpodea_X	Tremellales	Protist	Fungi	-0.322257	0	0.245513	0
This work	Cryomonadida	Tremellales	Protist	Fungi	0.193319	2.26485e-14	0.528501	0
This work	Euglyphida	Tremellales	Protist	Fungi	0.0613322	0.0163201	0.43973	0
This work	Eugregarinorida	Tremellales	Protist	Fungi	0.207775	2.22045e-16	0.469367	0
This work	Glissomonadida	Tremellales	Protist	Fungi	0.105386	3.55895e-05	0.462593	0
This work	Hypotrichia	Tremellales	Protist	Fungi	-0.11804	3.58445e-06	0.241263	4.44089e-16
This work	Petalomonadida	Tremellales	Protist	Fungi	-0.333965	0	0.172249	7.3239e-09
This work	Sphaeropleales	Tremellales	Protist	Fungi	-0.121472	1.84372e-06	0.113129	0.000155515
This work	Centramoebida	Xylariales	Protist	Fungi	-0.0470228	0.0656765	0.639094	0
This work	Cercomonadida	Xylariales	Protist	Fungi	-0.0324568	0.20405	0.708417	0
This work	Colpodea_X	Xylariales	Protist	Fungi	0.0984685	0.000112632	0.712056	0
This work	Cryomonadida	Xylariales	Protist	Fungi	-0.17512	5.04152e-12	0.710116	0
This work	Euglyphida	Xylariales	Protist	Fungi	0.116417	4.87807e-06	0.738467	0
This work	Eugregarinorida	Xylariales	Protist	Fungi	0.0719197	0.00484347	0.635947	0
This work	Glissomonadida	Xylariales	Protist	Fungi	-0.0158503	0.535173	0.680155	0
This work	Hypotrichia	Xylariales	Protist	Fungi	0.083449	0.0010741	0.600628	0
This work	Petalomonadida	Xylariales	Protist	Fungi	0.0585452	0.0218854	0.630743	0
This work	Sphaeropleales	Xylariales	Protist	Fungi	-0.234789	0	0.259706	0
This work	Sphaeropleales	Centramoebida	Protist	Protist	0.186018	2.11386e-13	0.428815	0
This work	Centramoebida	Cercomonadida	Protist	Protist	0.459631	0	0.82454	0
This work	Cryomonadida	Cercomonadida	Protist	Protist	0.202642	1.11022e-15	0.792385	0
This work	Hypotrichia	Cercomonadida	Protist	Protist	0.0574476	0.0244934	0.652897	0
This work	Petalomonadida	Cercomonadida	Protist	Protist	0.269224	0	0.756595	0
This work	Sphaeropleales	Cercomonadida	Protist	Protist	0.0954764	0.000181298	0.397773	0
This work	Centramoebida	Colpodea_X	Protist	Protist	0.16049	2.62211e-10	0.749604	0
This work	Cercomonadida	Colpodea_X	Protist	Protist	0.159179	3.67248e-10	0.812915	0
This work	Cryomonadida	Colpodea_X	Protist	Protist	0.119572	2.67007e-06	0.747579	0
This work	Euglyphida	Colpodea_X	Protist	Protist	0.179876	1.29385e-12	0.788613	0
This work	Glissomonadida	Colpodea_X	Protist	Protist	-0.0518817	0.0422484	0.707674	0
This work	Hypotrichia	Colpodea_X	Protist	Protist	0.395708	0	0.768948	0
This work	Petalomonadida	Colpodea_X	Protist	Protist	0.419103	0	0.794519	0
This work	Sphaeropleales	Colpodea_X	Protist	Protist	0.173802	7.30127e-12	0.424519	0
This work	Centramoebida	Cryomonadida	Protist	Protist	0.0978878	0.000123663	0.669217	0
This work	Sphaeropleales	Cryomonadida	Protist	Protist	0.29435	0	0.441726	0
This work	Centramoebida	Euglyphida	Protist	Protist	0.107318	2.54682e-05	0.716669	0
This work	Cercomonadida	Euglyphida	Protist	Protist	0.299939	0	0.835552	0
This work	Cryomonadida	Euglyphida	Protist	Protist	0.260834	0	0.793677	0
This work	Hypotrichia	Euglyphida	Protist	Protist	0.184069	3.7792e-13	0.678459	0
This work	Petalomonadida	Euglyphida	Protist	Protist	0.178475	1.93889e-12	0.709116	0
This work	Sphaeropleales	Euglyphida	Protist	Protist	-0.197098	6.88338e-15	0.236393	1.33227e-15
This work	Centramoebida	Eugregarinorida	Protist	Protist	-0.155597	9.09546e-10	0.548831	0
This work	Cercomonadida	Eugregarinorida	Protist	Protist	-0.17221	1.1378e-11	0.64033	0
This work	Colpodea_X	Eugregarinorida	Protist	Protist	-0.169659	2.29587e-11	0.603537	0
This work	Cryomonadida	Eugregarinorida	Protist	Protist	-0.0713125	0.00521543	0.627743	0
This work	Euglyphida	Eugregarinorida	Protist	Protist	0.0647609	0.0112059	0.675748	0
This work	Glissomonadida	Eugregarinorida	Protist	Protist	-0.0924893	0.000287729	0.625106	0
This work	Hypotrichia	Eugregarinorida	Protist	Protist	-0.124107	1.0929e-06	0.502176	0
This work	Petalomonadida	Eugregarinorida	Protist	Protist	-0.195496	1.15463e-14	0.503119	0
This work	Sphaeropleales	Eugregarinorida	Protist	Protist	-0.212724	0	0.182654	8.32986e-10
This work	Centramoebida	Glissomonadida	Protist	Protist	0.214435	0	0.722451	0
This work	Cercomonadida	Glissomonadida	Protist	Protist	0.469222	0	0.870403	0
This work	Cryomonadida	Glissomonadida	Protist	Protist	0.161521	2.00748e-10	0.759631	0
This work	Euglyphida	Glissomonadida	Protist	Protist	0.169007	2.74234e-11	0.7753	0
This work	Hypotrichia	Glissomonadida	Protist	Protist	-0.00559179	0.826836	0.590699	0
This work	Petalomonadida	Glissomonadida	Protist	Protist	-0.0449369	0.0785957	0.619016	0
This work	Sphaeropleales	Glissomonadida	Protist	Protist	-0.100634	7.91348e-05	0.280464	0
This work	Centramoebida	Hypotrichia	Protist	Protist	0.0332388	0.193356	0.573334	0
This work	Cryomonadida	Hypotrichia	Protist	Protist	0.167251	4.41025e-11	0.639991	0
This work	Sphaeropleales	Hypotrichia	Protist	Protist	0.0434018	0.0893663	0.278969	0
This work	Centramoebida	Petalomonadida	Protist	Protist	0.227934	0	0.680526	0
This work	Cryomonadida	Petalomonadida	Protist	Protist	0.252628	0	0.70591	0
This work	Hypotrichia	Petalomonadida	Protist	Protist	0.151029	2.80486e-09	0.618472	0
This work	Sphaeropleales	Petalomonadida	Protist	Protist	0.257315	0	0.456453	0

## Sheet: Table S6B
ASVID	Degree	Closeness	Betweenness	Zi	Pi	Roles	Taxonomy
bASV1	12	0.202555	10386.1	1.7044	0.0626793	Peripherals	d__Bacteria; p__Proteobacteria; c__Gammaproteobacteria; o__Pseudomonadales; f__Pseudomonadaceae; g__Pseudomonas
bASV10	7	0.168592	14.6333	0.477497	0	Peripherals	d__Bacteria; p__Proteobacteria; c__Gammaproteobacteria; o__Pseudomonadales; f__Pseudomonadaceae; g__Pseudomonas
bASV100	1	0.208943	0	-1.10947	0	Peripherals	d__Bacteria; p__Proteobacteria; c__Alphaproteobacteria; o__Rhizobiales; f__Rhizobiaceae; g__Allorhizobium-Neorhizobium-Pararhizobium-Rhizobium
bASV1000	44	0.339973	29.9406	-0.728081	0	Peripherals	d__Bacteria; p__Acidobacteriota; c__Acidobacteriae; o__Acidobacteriales; f__uncultured; g__uncultured
bASV1001	326	0.447556	1224.96	1.7731	0	Peripherals	d__Bacteria; p__Proteobacteria; c__Alphaproteobacteria; o__Rhizobiales; f__Xanthobacteraceae; g__uncultured
bASV1003	252	0.413977	541.502	1.11676	0.0277723	Peripherals	d__Bacteria; p__Chloroflexi; c__AD3; o__AD3; f__AD3; g__AD3; s__uncultured_bacterium
bASV1006	66	0.360286	580.165	-0.532953	0	Peripherals	d__Bacteria; p__Proteobacteria; c__Alphaproteobacteria; o__Rhizobiales; f__Xanthobacteraceae; g__Rhodoplanes; s__uncultured_bacterium
bASV1007	387	0.457935	2564.09	1.74351	0	Peripherals	d__Bacteria; p__Actinobacteriota; c__Thermoleophilia; o__Solirubrobacterales; f__67-14; g__67-14
bASV1008	404	0.45432	6210.73	1.86692	0	Peripherals	d__Bacteria; p__Proteobacteria; c__Alphaproteobacteria; o__Rhodobacterales; f__Rhodobacteraceae; g__Amaricoccus; s__uncultured_bacterium
bASV1009	100	0.352283	33.749	-0.231392	0.0912534	Peripherals	d__Bacteria; p__Proteobacteria; c__Alphaproteobacteria; o__uncultured; f__uncultured; g__uncultured
bASV101	5	0.202026	2011.17	-0.0132638	0	Peripherals	d__Bacteria; p__Proteobacteria; c__Gammaproteobacteria; o__Enterobacterales
bASV1010	2	0.267499	0	-1.0513	0	Peripherals	d__Bacteria; p__Firmicutes; c__Bacilli; o__Bacillales; f__Bacillaceae; g__Bacillus
bASV1011	373	0.462033	5428.66	2.18997	0	Peripherals	d__Bacteria; p__Proteobacteria; c__Alphaproteobacteria; o__Rhizobiales; f__Xanthobacteraceae; g__Xanthobacteraceae; s__Rhizobiales_bacterium
bASV1012	15	0.343452	0	-0.985295	0.48	Peripherals	d__Bacteria; p__Dependentiae; c__Babeliae; o__Babeliales; f__Vermiphilaceae; g__Vermiphilaceae
bASV1013	119	0.405395	52.7262	-0.201965	0.0196059	Peripherals	d__Bacteria; p__Proteobacteria; c__Alphaproteobacteria; o__Caulobacterales; f__Hyphomonadaceae; g__SWB02
bASV1014	110	0.382671	212.459	-0.142697	0	Peripherals	d__Bacteria; p__Proteobacteria; c__Gammaproteobacteria; o__Burkholderiales; f__Nitrosomonadaceae; g__MND1
bASV1015	145	0.412959	455.084	-0.0132248	0	Peripherals	d__Bacteria; p__Proteobacteria; c__Alphaproteobacteria; o__Rhizobiales; f__Rhizobiaceae; g__Allorhizobium-Neorhizobium-Pararhizobium-Rhizobium
bASV1017	19	0.354203	1.68353	-0.949817	0	Peripherals	d__Bacteria; p__Proteobacteria; c__Alphaproteobacteria; o__Rhodospirillales; f__Rhodospirillaceae; g__uncultured
bASV1018	119	0.40613	7558.35	-0.201965	0	Peripherals	d__Bacteria; p__Chloroflexi; c__Chloroflexia; o__Chloroflexales; f__Roseiflexaceae
bASV1019	1	1	0	0	0	Peripherals	d__Bacteria; p__Proteobacteria; c__Gammaproteobacteria; o__Burkholderiales; f__Comamonadaceae; g__Comamonas; s__Comamonas_koreensis
bASV102	49	0.378074	786.779	-0.683734	0	Peripherals	d__Bacteria; p__Proteobacteria; c__Gammaproteobacteria; o__Burkholderiales; f__Burkholderiaceae; g__Burkholderia-Caballeronia-Paraburkholderia
bASV1021	294	0.430434	2740.56	1.0684	0.241174	Peripherals	d__Bacteria; p__Proteobacteria; c__Gammaproteobacteria; o__Pseudomonadales; f__Pseudomonadaceae; g__Pseudomonas; s__Pseudomonas_oryzae
bASV1022	449	0.483553	4395.74	2.19359	0	Peripherals	d__Bacteria; p__Proteobacteria; c__Alphaproteobacteria; o__Rhizobiales; f__Xanthobacteraceae; g__uncultured
bASV1023	317	0.452279	5241.66	1.23537	0	Peripherals	d__Bacteria; p__Proteobacteria; c__Alphaproteobacteria; o__Rhizobiales; f__Rhizobiaceae; g__Mesorhizobium; s__Mesorhizobium_tamadayense
bASV1024	80	0.36565	564.845	-0.408781	0	Peripherals	d__Bacteria; p__Acidobacteriota; c__Acidobacteriae; o__Acidobacteriales; f__uncultured; g__uncultured; s__uncultured_Acidobacteria
bASV1025	26	0.335443	0.0463106	-0.887731	0.251255	Peripherals	d__Bacteria; p__Chloroflexi; c__TK10; o__TK10; f__TK10; g__TK10; s__uncultured_bacterium
bASV1027	376	0.462882	3714.87	2.21658	0	Peripherals	d__Bacteria; p__Acidobacteriota; c__Acidobacteriae; o__Acidobacteriales; f__uncultured; g__uncultured
bASV1029	3	0.303542	0.100484	-1.09173	0	Peripherals	d__Bacteria; p__Proteobacteria; c__Gammaproteobacteria; o__Burkholderiales; f__Burkholderiaceae; g__Burkholderia-Caballeronia-Paraburkholderia
bASV103	4	0.202006	1004.83	-0.258644	0.252781	Peripherals	d__Bacteria; p__Proteobacteria; c__Gammaproteobacteria; o__Enterobacterales; f__Erwiniaceae; g__Pantoea
bASV1030	146	0.389028	2525.21	0.176603	0	Peripherals	d__Bacteria; p__Proteobacteria; c__Gammaproteobacteria; o__Burkholderiales; f__Comamonadaceae; g__Ramlibacter
bASV1031	280	0.446662	2585.17	0.966774	0.270867	Peripherals	d__Bacteria; p__Proteobacteria; c__Gammaproteobacteria; o__Burkholderiales; f__SC-I-84; g__SC-I-84
bASV1032	76	0.362035	34.4437	-0.444259	0	Peripherals	d__Bacteria; p__Proteobacteria; c__Alphaproteobacteria; o__Rhizobiales; f__Xanthobacteraceae; g__uncultured
bASV1033	234	0.417669	989.529	0.957115	0.444444	Peripherals	d__Bacteria; p__Acidobacteriota; c__Acidobacteriae; o__Acidobacteriales; f__uncultured; g__uncultured
bASV1034	227	0.405885	120.43	0.895029	0	Peripherals	d__Bacteria; p__Acidobacteriota; c__Acidobacteriae; o__Acidobacteriales; f__uncultured; g__uncultured
bASV1035	162	0.373101	76.4518	0.318514	0	Peripherals	d__Bacteria; p__Acidobacteriota; c__Acidobacteriae; o__Solibacterales; f__Solibacteraceae; g__Candidatus_Solibacter
bASV1037	1	0.265105	0	-1.05856	0.158257	Peripherals	d__Bacteria; p__Proteobacteria; c__Alphaproteobacteria; o__Rhizobiales; f__Xanthobacteraceae
bASV1038	177	0.394361	126.328	0.219071	0	Peripherals	d__Bacteria; p__Proteobacteria; c__Alphaproteobacteria; o__Rhizobiales; f__Xanthobacteraceae; g__uncultured
bASV1039	1	0.246965	0	-1.05856	0.202908	Peripherals	d__Bacteria; p__Actinobacteriota; c__Actinobacteria; o__Micrococcales; f__Intrasporangiaceae; g__Phycicoccus
bASV104	5	0.202026	1005.83	-0.0132638	0.0123072	Peripherals	d__Bacteria; p__Proteobacteria; c__Gammaproteobacteria; o__Enterobacterales; f__Erwiniaceae; g__Pantoea; s__Pantoea_rwandensis
bASV1040	325	0.453297	1981.56	1.29344	0.0447526	Peripherals	d__Bacteria; p__Acidobacteriota; c__Acidobacteriae; o__Solibacterales; f__Solibacteraceae; g__Candidatus_Solibacter
bASV1042	3	0.261389	0	-0.391931	0	Peripherals	d__Bacteria; p__Firmicutes; c__Bacilli; o__Paenibacillales; f__Paenibacillaceae; g__Paenibacillus
bASV1043	163	0.420987	2257.64	0.117442	0	Peripherals	d__Bacteria; p__Actinobacteriota; c__Thermoleophilia; o__Gaiellales; f__uncultured; g__uncultured
bASV1044	78	0.380215	13.5583	-0.499595	0	Peripherals	d__Bacteria; p__Gemmatimonadota; c__Gemmatimonadetes; o__Gemmatimonadales; f__Gemmatimonadaceae; g__uncultured
bASV1045	81	0.359707	665.366	-0.399911	0.134127	Peripherals	d__Bacteria; p__Proteobacteria; c__Alphaproteobacteria; o__Rhizobiales; f__Rhizobiaceae; g__Allorhizobium-Neorhizobium-Pararhizobium-Rhizobium; s__Rhizobium_tibeticum
bASV1048	172	0.392899	2763.68	0.182775	0	Peripherals	d__Bacteria; p__Proteobacteria; c__Gammaproteobacteria; o__Burkholderiales; f__Nitrosomonadaceae; g__Ellin6067; s__uncultured_bacterium
bASV105	9	0.326101	4029.54	-1.03851	0	Peripherals	d__Bacteria; p__Proteobacteria; c__Gammaproteobacteria; o__Xanthomonadales; f__Rhodanobacteraceae; g__Dyella
bASV1050	37	0.351055	13.5121	-0.790167	0.099723	Peripherals	d__Bacteria; p__Proteobacteria; c__Alphaproteobacteria; o__Rhizobiales; f__Beijerinckiaceae; g__uncultured; s__uncultured_forest
bASV1052	261	0.427692	3084.52	1.19659	0	Peripherals	d__Bacteria; p__Actinobacteriota; c__Thermoleophilia; o__Gaiellales; f__uncultured; g__uncultured
bASV1053	2	0.320701	0	-1.0513	0	Peripherals	d__Bacteria; p__Actinobacteriota; c__Acidimicrobiia; o__IMCC26256; f__IMCC26256; g__IMCC26256; s__uncultured_Acidimicrobiia
bASV1055	33	0.337297	12.856	-0.825645	0.25919	Peripherals	d__Bacteria; p__Proteobacteria; c__Alphaproteobacteria; o__Rhizobiales; f__Xanthobacteraceae; g__uncultured; s__uncultured_bacterium
bASV1056	12	0.321931	2.43834	-1.0119	0	Peripherals	d__Bacteria; p__Proteobacteria; c__Gammaproteobacteria; o__Burkholderiales; f__SC-I-84; g__SC-I-84
bASV1057	172	0.411945	882.381	0.182775	0	Peripherals	d__Bacteria; p__Actinobacteriota; c__Thermoleophilia; o__Gaiellales; f__Gaiellaceae; g__Gaiella; s__uncultured_Acidimicrobiia
bASV1058	222	0.426966	5522.03	0.545738	0	Peripherals	d__Bacteria; p__Proteobacteria; c__Alphaproteobacteria; o__Rhizobiales; f__Xanthobacteraceae; g__uncultured
bASV106	392	0.491939	12577.9	1.77981	0.124899	Peripherals	d__Bacteria; p__Proteobacteria; c__Gammaproteobacteria; o__Burkholderiales; f__SC-I-84; g__SC-I-84
bASV1060	439	0.470341	5884.43	2.121	0.019998	Peripherals	d__Bacteria; p__Actinobacteriota; c__MB-A2-108; o__MB-A2-108; f__MB-A2-108; g__MB-A2-108; s__uncultured_bacterium
bASV1061	211	0.396379	4835.12	0.753117	0.0143877	Peripherals	d__Bacteria; p__Proteobacteria; c__Alphaproteobacteria; o__Rhizobiales; f__Xanthobacteraceae; g__Rhodoplanes
bASV1062	63	0.381079	19.9134	-0.608484	0.444444	Peripherals	d__Bacteria; p__Proteobacteria; c__Alphaproteobacteria; o__Rhizobiales; f__Xanthobacteraceae; g__uncultured
bASV1063	3	0.322085	0	-1.04404	0.0143191	Peripherals	d__Bacteria; p__Actinobacteriota; c__Actinobacteria; o__Propionibacteriales; f__Nocardioidaceae; g__Aeromicrobium; s__uncultured_bacterium
bASV1066	153	0.388204	2370.98	0.238689	0	Peripherals	d__Bacteria; p__Actinobacteriota; c__Thermoleophilia; o__Gaiellales; f__uncultured; g__uncultured
bASV1068	232	0.43878	1525.96	0.61833	0.235537	Peripherals	d__Bacteria; p__Proteobacteria; c__Alphaproteobacteria; o__Rhizobiales; f__Devosiaceae; g__Devosia
bASV1069	42	0.340663	5.21079	-0.74582	0	Peripherals	d__Bacteria; p__Acidobacteriota; c__Acidobacteriae; o__Acidobacteriales; f__uncultured; g__uncultured
bASV1071	453	0.481588	8501.19	2.22263	0.0579194	Peripherals	d__Bacteria; p__Acidobacteriota; c__Acidobacteriae; o__Bryobacterales; f__Bryobacteraceae; g__Bryobacter
bASV1072	276	0.390992	270.448	1.32963	0	Peripherals	d__Bacteria; p__Proteobacteria; c__Alphaproteobacteria; o__Rhizobiales; f__Xanthobacteraceae; g__Bradyrhizobium
bASV1073	83	0.392363	565.158	-0.463299	0.375549	Peripherals	d__Bacteria; p__Actinobacteriota; c__Actinobacteria; o__Propionibacteriales; f__Nocardioidaceae; g__Nocardioides
bASV1074	73	0.36132	22.6805	-0.470867	0.0525931	Peripherals	d__Bacteria; p__Proteobacteria; c__Alphaproteobacteria; o__Elsterales; f__uncultured; g__uncultured
bASV1075	75	0.354203	146.377	-0.453128	0.0269008	Peripherals	d__Bacteria; p__Proteobacteria; c__Gammaproteobacteria; o__Xanthomonadales; f__Rhodanobacteraceae; g__Rhodanobacter; s__uncultured_Xanthomonadaceae
bASV1077	16	0.34275	18.7968	-0.976426	0	Peripherals	d__Bacteria; p__Proteobacteria; c__Alphaproteobacteria; o__Rhizobiales; f__Hyphomicrobiaceae; g__Pedomicrobium
bASV108	14	0.336789	107.365	-0.994165	0.102591	Peripherals	d__Bacteria; p__Proteobacteria; c__Gammaproteobacteria; o__Burkholderiales; f__Comamonadaceae; g__Variovorax
bASV1080	203	0.424	1383.59	0.682162	0.0570934	Peripherals	d__Bacteria; p__Actinobacteriota; c__Actinobacteria; o__Streptomycetales; f__Streptomycetaceae; g__Streptacidiphilus; s__Streptacidiphilus_sp.
bASV1081	183	0.365982	76.9602	0.504773	0.48	Peripherals	d__Bacteria; p__Acidobacteriota; c__Acidobacteriae; o__Acidobacteriales; f__uncultured; g__uncultured
bASV1082	270	0.436876	546.522	1.27641	0	Peripherals	d__Bacteria; p__Acidobacteriota; c__Acidobacteriae; o__Bryobacterales; f__Bryobacteraceae; g__Bryobacter
bASV1083	128	0.399286	1262.66	-0.136632	0	Peripherals	d__Bacteria; p__Chloroflexi; c__Chloroflexia; o__Chloroflexales; f__Roseiflexaceae; g__uncultured; s__uncultured_bacterium
bASV1086	174	0.419583	597.697	0.197294	0.00628925	Peripherals	d__Bacteria; p__Actinobacteriota; c__Thermoleophilia; o__Gaiellales
bASV1087	128	0.383035	1021.76	0.0169529	0	Peripherals	d__Bacteria; p__Proteobacteria; c__Alphaproteobacteria; o__uncultured; f__uncultured; g__uncultured
bASV1088	151	0.412198	144.988	0.0303307	0.152778	Peripherals	d__Bacteria; p__Myxococcota; c__Polyangia; o__Polyangiales; f__Sandaracinaceae; g__uncultured; s__uncultured_bacterium
bASV109	274	0.465557	2694.77	0.923219	0.611111	Peripherals	d__Bacteria; p__Proteobacteria; c__Alphaproteobacteria; o__Rhizobiales; f__Hyphomicrobiaceae; g__Pedomicrobium
bASV1090	82	0.387382	63.44	-0.470558	0.0178963	Peripherals	d__Bacteria; p__Proteobacteria; c__Alphaproteobacteria; o__Sphingomonadales; f__Sphingomonadaceae
bASV1092	5	0.202006	0.666667	-0.0132638	0.0162261	Peripherals	d__Bacteria; p__Proteobacteria; c__Gammaproteobacteria; o__Enterobacterales; f__Enterobacteriaceae
bASV1093	83	0.390916	23.2311	-0.463299	0	Peripherals	d__Bacteria; p__Proteobacteria; c__Alphaproteobacteria; o__Rhizobiales; f__Rhizobiales_Incertae_Sedis; g__uncultured; s__uncultured_bacterium
bASV1094	247	0.436971	4685.46	1.07242	0.161513	Peripherals	d__Bacteria; p__Proteobacteria; c__Alphaproteobacteria; o__Rhizobiales; f__Xanthobacteraceae; g__Xanthobacteraceae; s__Rhizobiales_bacterium
bASV1095	282	0.451064	1331.91	0.981293	0.494341	Peripherals	d__Bacteria; p__Proteobacteria; c__Alphaproteobacteria; o__Rhizobiales; f__uncultured; g__uncultured; s__uncultured_Alphaproteobacteria
bASV1096	223	0.432839	2251.77	0.552997	0	Peripherals	d__Bacteria; p__Actinobacteriota; c__Thermoleophilia; o__Gaiellales; f__uncultured; g__uncultured; s__uncultured_bacterium
bASV1097	5	0.314148	0.288926	-1.07399	0	Peripherals	d__Bacteria; p__Firmicutes; c__Bacilli; o__Bacillales; f__Planococcaceae
bASV11	1	1	0	0	0.297521	Peripherals	d__Bacteria; p__Proteobacteria; c__Gammaproteobacteria; o__Pseudomonadales; f__Moraxellaceae; g__Acinetobacter
bASV110	212	0.445083	680.649	0.473145	0	Peripherals	d__Bacteria; p__Proteobacteria; c__Gammaproteobacteria; o__Gammaproteobacteria_Incertae_Sedis; f__Unknown_Family; g__Acidibacter
bASV1100	179	0.380503	188.611	0.469295	0.0298439	Peripherals	d__Bacteria; p__Acidobacteriota; c__Acidobacteriae; o__Solibacterales; f__Solibacteraceae; g__Candidatus_Solibacter
bASV1101	268	0.425074	359.845	1.25868	0.015624	Peripherals	d__Bacteria; p__Verrucomicrobiota; c__Verrucomicrobiae; o__Pedosphaerales; f__Pedosphaeraceae; g__Ellin516; s__uncultured_bacterium
bASV1102	534	0.5	15784.5	2.81062	0	Module hubs	d__Bacteria; p__Actinobacteriota; c__Acidimicrobiia; o__Microtrichales; f__Ilumatobacteraceae
bASV1104	299	0.45804	2058.23	1.1047	0	Peripherals	d__Bacteria; p__Gemmatimonadota; c__Gemmatimonadetes; o__Gemmatimonadales; f__Gemmatimonadaceae; g__Gemmatimonas
bASV1105	138	0.398496	63.9254	-0.0640396	0.0784711	Peripherals	d__Bacteria; p__Bacteroidota; c__Bacteroidia; o__Flavobacteriales; f__Flavobacteriaceae; g__Flavobacterium; s__Flavobacterium_cauense
bASV1106	280	0.439546	1913.66	0.966774	0.00970851	Peripherals	d__Bacteria; p__Actinobacteriota; c__Acidimicrobiia; o__Microtrichales; f__uncultured; g__uncultured
bASV1107	39	0.357663	1234.02	-0.782706	0	Peripherals	d__Bacteria; p__Desulfobacterota; c__Desulfuromonadia; o__Geobacterales; f__Geobacteraceae
bASV1108	1	1	0	0	0	Peripherals	d__Bacteria; p__Proteobacteria; c__Alphaproteobacteria; o__Rhizobiales; f__Rhizobiaceae
bASV1109	270	0.413807	377.823	1.27641	0.0708717	Peripherals	d__Bacteria; p__Verrucomicrobiota; c__Verrucomicrobiae; o__Pedosphaerales; f__Pedosphaeraceae; g__Pedosphaera; s__uncultured_bacterium
bASV111	347	0.462033	12383.8	1.45314	0.0375449	Peripherals	d__Bacteria; p__Proteobacteria; c__Alphaproteobacteria; o__Rhizobiales; f__Methyloligellaceae
bASV1112	99	0.400637	677.931	-0.34715	0.444444	Peripherals	d__Bacteria; p__Proteobacteria; c__Alphaproteobacteria; o__Rhizobiales; f__Rhizobiaceae; g__Mesorhizobium
bASV1113	151	0.382963	2267.45	0.22095	0	Peripherals	d__Bacteria; p__Acidobacteriota; c__Acidobacteriae; o__Solibacterales; f__Solibacteraceae; g__Candidatus_Solibacter
bASV1114	10	0.351116	0.0292306	-0.993224	0	Peripherals	d__Bacteria; p__Proteobacteria; c__Gammaproteobacteria; o__Burkholderiales; f__Comamonadaceae
bASV1115	259	0.393436	650.949	1.17885	0.18	Peripherals	d__Bacteria; p__Proteobacteria; c__Gammaproteobacteria; o__Burkholderiales; f__Nitrosomonadaceae; g__mle1-7; s__uncultured_Rhodocyclaceae
bASV1116	5	0.249412	5.07486	-1.02952	0	Peripherals	d__Bacteria; p__Bacteroidota; c__Bacteroidia; o__Chitinophagales; f__Chitinophagaceae; g__Niastella
bASV1117	237	0.418276	345.652	0.983723	0.499792	Peripherals	d__Bacteria; p__Proteobacteria; c__Alphaproteobacteria; o__Rhizobiales; f__Beijerinckiaceae; g__Roseiarcus; s__uncultured_bacterium
bASV1118	8	0.355893	0.192891	-1.00774	0.0183471	Peripherals	d__Bacteria; p__Proteobacteria; c__Gammaproteobacteria; o__Xanthomonadales; f__Xanthomonadaceae; g__Pseudoxanthomonas
bASV1119	50	0.384351	14.9467	-0.702854	0.194725	Peripherals	d__Bacteria; p__Chloroflexi; c__JG30-KF-CM66; o__JG30-KF-CM66; f__JG30-KF-CM66; g__JG30-KF-CM66; s__uncultured_bacterium
bASV112	245	0.458665	8681.48	0.712701	0	Peripherals	d__Bacteria; p__Actinobacteriota; c__MB-A2-108; o__MB-A2-108; f__MB-A2-108; g__MB-A2-108
bASV1120	20	0.351116	38.6852	-0.920631	0.0700826	Peripherals	d__Bacteria; p__Proteobacteria; c__Gammaproteobacteria; o__Burkholderiales; f__Comamonadaceae
bASV1122	39	0.353644	0.407312	-0.772428	0.00966161	Peripherals	d__Bacteria; p__Proteobacteria; c__Alphaproteobacteria; o__Elsterales; f__uncultured; g__uncultured
bASV1123	308	0.447854	1925.79	1.61345	0	Peripherals	d__Bacteria; p__Acidobacteriota; c__Acidobacteriae; o__Bryobacterales; f__Bryobacteraceae; g__Bryobacter; s__uncultured_Acidobacteria
bASV1126	9	0.337184	7.43491	-1.00048	0	Peripherals	d__Bacteria; p__Proteobacteria; c__Alphaproteobacteria; o__Rhizobiales; f__Hyphomicrobiaceae; g__Hyphomicrobium
bASV1129	43	0.370357	5894.72	-0.753669	0	Peripherals	d__Bacteria; p__Firmicutes; c__Clostridia; o__Clostridiales; f__Clostridiaceae; g__Clostridium_sensu_stricto_9; s__uncultured_bacterium
bASV113	530	0.500373	14411.7	2.78159	0	Module hubs	d__Bacteria; p__Actinobacteriota; c__Actinobacteria; o__Micrococcales; f__Microbacteriaceae; g__Agromyces
bASV1131	276	0.435742	4841.24	0.937737	0.140362	Peripherals	d__Bacteria; p__Proteobacteria; c__Gammaproteobacteria; o__Burkholderiales; f__Nitrosomonadaceae; g__mle1-7; s__uncultured_bacterium
bASV1132	82	0.375816	1280.79	-0.391042	0.11022	Peripherals	d__Bacteria; p__Acidobacteriota; c__Subgroup_11; o__Subgroup_11; f__Subgroup_11; g__Subgroup_11; s__uncultured_bacterium
bASV1133	377	0.449554	2228.42	1.67092	0	Peripherals	d__Bacteria; p__Proteobacteria; c__Alphaproteobacteria; o__Rhodobacterales; f__Rhodobacteraceae; g__Amaricoccus
bASV1134	79	0.367921	1572.3	-0.41765	0	Peripherals	d__Bacteria; p__Proteobacteria; c__Alphaproteobacteria; o__Rhizobiales; f__Xanthobacteraceae; g__uncultured
bASV1135	227	0.426876	983.711	0.582034	0	Peripherals	d__Bacteria; p__Actinobacteriota; c__Actinobacteria; o__Frankiales; f__Frankiales; g__Frankiales; s__uncultured_bacterium
bASV1138	36	0.351975	2097.6	-0.799037	0	Peripherals	d__Bacteria; p__Actinobacteriota; c__Acidimicrobiia; o__Microtrichales
bASV1139	10	0.34153	0.305231	-0.993224	0.1068	Peripherals	d__Bacteria; p__Actinobacteriota; c__Actinobacteria; o__Propionibacteriales; f__Nocardioidaceae; g__Nocardioides
bASV114	463	0.493627	15311.6	2.29522	0.00727263	Peripherals	d__Bacteria; p__Proteobacteria; c__Alphaproteobacteria; o__Dongiales; f__Dongiaceae; g__Dongia
bASV1140	1	0.5	0	-1.65359	0	Peripherals	d__Bacteria; p__Bacteroidota; c__Bacteroidia; o__Flavobacteriales; f__Flavobacteriaceae; g__Flavobacterium; s__Flavobacterium_lindanitolerans
bASV1142	329	0.457208	1638.65	1.32248	0.1068	Peripherals	d__Bacteria; p__Actinobacteriota; c__Actinobacteria; o__Micrococcales; f__Intrasporangiaceae; g__Intrasporangium
bASV1143	46	0.373863	0.139266	-0.731891	0	Peripherals	d__Bacteria; p__Actinobacteriota; c__Thermoleophilia; o__Solirubrobacterales; f__Solirubrobacteraceae; g__Conexibacter; s__uncultured_bacterium
bASV1144	15	0.333389	201.249	-0.985295	0.0217365	Peripherals	d__Bacteria; p__Bacteroidota; c__Bacteroidia; o__Chitinophagales; f__Chitinophagaceae; g__uncultured; s__uncultured_Chitinophagaceae
bASV1147	247	0.431079	334.9	1.07242	0	Peripherals	d__Bacteria; p__Acidobacteriota; c__Acidobacteriae; o__Subgroup_2; f__Subgroup_2; g__Subgroup_2
bASV1148	16	0.311042	0.017077	-0.976426	0.204544	Peripherals	d__Bacteria; p__Actinobacteriota; c__Actinobacteria; o__Corynebacteriales; f__Nocardiaceae; g__Nocardia
bASV1149	8	0.346465	0.0822751	-1.00774	0.0117643	Peripherals	d__Bacteria; p__Proteobacteria; c__Alphaproteobacteria; o__Rhizobiales
bASV115	505	0.495937	11716.7	2.60011	0.438172	Module hubs	d__Bacteria; p__Actinobacteriota; c__MB-A2-108; o__MB-A2-108; f__MB-A2-108; g__MB-A2-108
bASV1151	223	0.436403	1254.03	0.552997	0	Peripherals	d__Bacteria; p__Actinobacteriota; c__Actinobacteria; o__Micrococcales; f__Microbacteriaceae; g__Agromyces
bASV1152	4	0.295915	0	-1.08286	0	Peripherals	d__Bacteria; p__Firmicutes; c__Bacilli; o__Paenibacillales; f__Paenibacillaceae; g__Paenibacillus
bASV1153	8	0.321366	1.16931	-1.00774	0	Peripherals	d__Bacteria; p__Proteobacteria; c__Alphaproteobacteria; o__Reyranellales; f__Reyranellaceae; g__Reyranella
bASV1154	1	0.319328	0	-1.05856	0.0377219	Peripherals	d__Bacteria; p__Firmicutes; c__Bacilli; o__Alicyclobacillales; f__Alicyclobacillaceae; g__Tumebacillus
bASV1157	187	0.400159	1465.96	0.291664	0	Peripherals	d__Bacteria; p__Proteobacteria; c__Alphaproteobacteria; o__Rhizobiales; f__Hyphomicrobiaceae; g__Hyphomicrobium
bASV1158	360	0.442249	854.747	1.54751	0	Peripherals	d__Bacteria; p__Actinobacteriota; c__Actinobacteria; o__Pseudonocardiales; f__Pseudonocardiaceae; g__Pseudonocardia
bASV1159	108	0.374419	281.872	-0.160436	0.302181	Peripherals	d__Bacteria; p__Proteobacteria; c__Alphaproteobacteria; o__Rhizobiales; f__Rhizobiaceae; g__Allorhizobium-Neorhizobium-Pararhizobium-Rhizobium
bASV116	198	0.429241	7131.64	0.637814	0	Peripherals	d__Bacteria; p__Proteobacteria; c__Alphaproteobacteria; o__Rhizobiales; f__Xanthobacteraceae; g__uncultured
bASV1160	3	0.312103	0.116478	-1.04404	0	Peripherals	d__Bacteria; p__Proteobacteria; c__Gammaproteobacteria; o__Burkholderiales; f__SC-I-84; g__SC-I-84
bASV1161	345	0.466096	3003.58	1.43863	0	Peripherals	d__Bacteria; p__Proteobacteria; c__Gammaproteobacteria; o__Cellvibrionales; f__Spongiibacteraceae; g__BD1-7_clade; s__uncultured_soil
bASV1162	265	0.443808	3249.71	0.857886	0	Peripherals	d__Bacteria; p__Proteobacteria; c__Alphaproteobacteria; o__Rhizobiales; f__uncultured; g__uncultured
bASV1164	214	0.388428	101.198	0.779726	0.43645	Peripherals	d__Bacteria; p__Acidobacteriota; c__Acidobacteriae; o__Acidobacteriales; f__uncultured; g__uncultured
bASV1165	157	0.391448	2727.12	0.274167	0.125555	Peripherals	d__Bacteria; p__Proteobacteria; c__Alphaproteobacteria; o__Rhizobiales; f__Xanthobacteraceae; g__uncultured
bASV1167	454	0.469245	4551.33	2.22988	0.495403	Peripherals	d__Bacteria; p__Actinobacteriota; c__Thermoleophilia; o__Gaiellales; f__Gaiellaceae; g__Gaiella; s__uncultured_bacterium
bASV1168	39	0.372687	7.01842	-0.782706	0	Peripherals	d__Bacteria; p__Actinobacteriota; c__Acidimicrobiia; o__Microtrichales; f__Ilumatobacteraceae
bASV1169	300	0.456172	2231.8	1.11196	0	Peripherals	d__Bacteria; p__Proteobacteria; c__Gammaproteobacteria; o__Burkholderiales; f__TRA3-20; g__TRA3-20; s__uncultured_beta
bASV117	19	0.362035	6.34342	-0.949817	0	Peripherals	d__Bacteria; p__Proteobacteria; c__Alphaproteobacteria; o__Rhizobiales; f__Methyloligellaceae; g__uncultured; s__uncultured_Rhodobium
bASV1170	78	0.369406	441.971	-0.499595	0.0642564	Peripherals	d__Bacteria; p__Proteobacteria; c__Alphaproteobacteria; o__Sphingomonadales; f__Sphingomonadaceae; g__Sphingomonas; s__uncultured_Sphingomonadaceae
bASV1172	268	0.418103	1228.58	0.879663	0	Peripherals	d__Bacteria; p__Actinobacteriota; c__Actinobacteria; o__Micrococcales; f__Intrasporangiaceae; g__uncultured; s__uncultured_bacterium
bASV1173	101	0.400557	3610.67	-0.332632	0.0499671	Peripherals	d__Bacteria; p__Proteobacteria; c__Alphaproteobacteria; o__Rhizobiales; f__A0839; g__A0839; s__uncultured_bacterium
bASV1175	223	0.399286	4211.76	0.859551	0	Peripherals	d__Bacteria; p__Proteobacteria; c__Alphaproteobacteria; o__Rhizobiales; f__Hyphomicrobiaceae; g__Hyphomicrobium
bASV1177	313	0.455553	2005.39	1.6578	0.5	Peripherals	d__Bacteria; p__Proteobacteria; c__Alphaproteobacteria; o__uncultured; f__uncultured; g__uncultured
bASV1178	144	0.364393	14.6587	0.158864	0.213039	Peripherals	d__Bacteria; p__Proteobacteria; c__Alphaproteobacteria; o__Rhizobiales; f__Beijerinckiaceae; g__Roseiarcus; s__uncultured_bacterium
bASV1179	198	0.395911	3923.55	0.637814	0.0336036	Peripherals	d__Bacteria; p__Acidobacteriota; c__Acidobacteriae; o__Acidobacteriales; f__uncultured; g__uncultured
bASV118	433	0.494719	11065	2.07744	0	Peripherals	d__Bacteria; p__Actinobacteriota; c__Acidimicrobiia; o__Microtrichales; f__Ilumatobacteraceae; g__Ilumatobacter
bASV1180	2	0.31454	0	-1.1006	0	Peripherals	d__Bacteria; p__Actinobacteriota; c__Acidimicrobiia; o__Microtrichales; f__uncultured; g__uncultured
bASV1182	188	0.423822	1167.58	0.54912	0	Peripherals	d__Bacteria; p__Proteobacteria; c__Alphaproteobacteria; o__Micropepsales; f__Micropepsaceae; g__uncultured; s__uncultured_Alphaproteobacteria
bASV1183	276	0.431911	507.613	1.32963	0	Peripherals	d__Bacteria; p__Proteobacteria; c__Gammaproteobacteria; o__Burkholderiales; f__A21b; g__A21b
bASV1184	130	0.381656	2741.79	0.0346918	0.0395878	Peripherals	d__Bacteria; p__Desulfobacterota; c__uncultured; o__uncultured; f__uncultured; g__uncultured
bASV1185	173	0.372274	25.7576	0.416078	0	Peripherals	d__Bacteria; p__Proteobacteria; c__Alphaproteobacteria; o__Rhizobiales; f__Xanthobacteraceae; g__Bradyrhizobium
bASV1186	98	0.406869	3041.39	-0.35441	0	Peripherals	d__Bacteria; p__Actinobacteriota; c__Actinobacteria; o__Propionibacteriales; f__Nocardioidaceae; g__Nocardioides; s__uncultured_organism
bASV1188	101	0.373101	497.766	-0.222522	0.237014	Peripherals	d__Bacteria; p__Proteobacteria; c__Gammaproteobacteria; o__Burkholderiales; f__SC-I-84; g__SC-I-84
bASV119	334	0.471884	6114.78	1.35877	0	Peripherals	d__Bacteria; p__Proteobacteria; c__Gammaproteobacteria; o__Burkholderiales; f__Sutterellaceae; g__uncultured
bASV1190	31	0.354952	120.592	-0.843384	0	Peripherals	d__Bacteria; p__Proteobacteria; c__Alphaproteobacteria; o__Rhizobiales; f__Rhizobiaceae; g__Allorhizobium-Neorhizobium-Pararhizobium-Rhizobium; s__Rhizobium_taeanense
bASV1193	263	0.427873	514.432	1.21433	0	Peripherals	d__Bacteria; p__Acidobacteriota; c__Acidobacteriae; o__Subgroup_2; f__Subgroup_2; g__Subgroup_2; s__uncultured_Holophaga
bASV1194	144	0.394129	1919.47	0.158864	0.0171661	Peripherals	d__Bacteria; p__Actinobacteriota; c__Thermoleophilia; o__Gaiellales; f__uncultured; g__uncultured
bASV1195	144	0.381079	1531.99	0.158864	0.237965	Peripherals	d__Bacteria; p__Proteobacteria; c__Gammaproteobacteria
bASV1197	341	0.462351	3662.6	1.90615	0	Peripherals	d__Bacteria; p__Proteobacteria; c__Alphaproteobacteria; o__Acetobacterales; f__Acetobacteraceae; g__uncultured
bASV1198	94	0.371655	723.403	-0.284608	0	Peripherals	d__Bacteria; p__Proteobacteria; c__Gammaproteobacteria; o__Burkholderiales; f__Nitrosomonadaceae; g__mle1-7
bASV12	1	0.14428	0	-0.994786	0.0338882	Peripherals	d__Bacteria; p__Proteobacteria; c__Alphaproteobacteria; o__Rhizobiales; f__Rhizobiaceae; g__Allorhizobium-Neorhizobium-Pararhizobium-Rhizobium
bASV120	356	0.461715	5123.41	2.03919	0.109221	Peripherals	d__Bacteria; p__Acidobacteriota; c__Acidobacteriae; o__Subgroup_2; f__Subgroup_2; g__Subgroup_2; s__uncultured_Acidobacteria
bASV1202	32	0.360997	15.9515	-0.83352	0	Peripherals	d__Bacteria; p__Acidobacteriota; c__Thermoanaerobaculia; o__Thermoanaerobaculales; f__Thermoanaerobaculaceae; g__Subgroup_10
bASV1203	315	0.430526	668.054	1.67554	0	Peripherals	d__Bacteria; p__Acidobacteriota; c__Acidobacteriae; o__Solibacterales; f__Solibacteraceae; g__Candidatus_Solibacter
bASV1205	48	0.35583	137.199	-0.692603	0	Peripherals	d__Bacteria; p__Proteobacteria; c__Gammaproteobacteria; o__Burkholderiales; f__Nitrosomonadaceae; g__IS-44; s__uncultured_bacterium
bASV1207	406	0.472992	5106.7	1.88144	0	Peripherals	d__Bacteria; p__Gemmatimonadota; c__Gemmatimonadetes; o__Gemmatimonadales; f__Gemmatimonadaceae; g__uncultured
bASV121	43	0.37145	89.7504	-0.73695	0.571429	Peripherals	d__Bacteria; p__Actinobacteriota; c__Acidimicrobiia; o__IMCC26256; f__IMCC26256; g__IMCC26256
bASV1211	7	0.315229	25.028	-1.05625	0	Peripherals	d__Bacteria; p__Chloroflexi; c__Chloroflexia; o__Chloroflexales; f__Roseiflexaceae; g__uncultured; s__uncultured_bacterium
bASV1212	224	0.426605	4867.92	0.86842	0	Peripherals	d__Bacteria; p__Gemmatimonadota; c__Gemmatimonadetes; o__Gemmatimonadales; f__Gemmatimonadaceae; g__Gemmatimonas
bASV1213	7	0.285108	0.041129	-1.05625	0	Peripherals	d__Bacteria; p__Bdellovibrionota; c__Oligoflexia; o__0319-6G20; f__0319-6G20; g__0319-6G20
bASV1214	66	0.365385	3924.15	-0.532953	0.277778	Peripherals	d__Bacteria; p__Proteobacteria; c__Alphaproteobacteria; o__Rhizobiales; f__Xanthobacteraceae; g__uncultured
bASV1215	232	0.437446	761.688	0.61833	0	Peripherals	d__Bacteria; p__Gemmatimonadota; c__Gemmatimonadetes; o__Gemmatimonadales; f__Gemmatimonadaceae; g__uncultured
bASV1216	272	0.446365	807.511	0.9087	0	Peripherals	d__Bacteria; p__Proteobacteria; c__Gammaproteobacteria; o__Xanthomonadales; f__Xanthomonadaceae; g__Lysobacter; s__Lysobacter_yangpyeongensis
bASV122	317	0.448952	3834.89	1.23537	0	Peripherals	d__Bacteria; p__Actinobacteriota; c__Actinobacteria; o__Propionibacteriales; f__Nocardioidaceae; g__Nocardioides
bASV1221	150	0.394747	2305.59	0.212081	0	Peripherals	d__Bacteria; p__Proteobacteria; c__Alphaproteobacteria; o__Rhizobiales; f__Xanthobacteraceae
bASV1224	84	0.390992	4418.9	-0.456039	0.0713306	Peripherals	d__Bacteria; p__Chloroflexi; c__TK10; o__TK10; f__TK10; g__TK10
bASV1225	11	0.295872	0.190353	-1.02077	0	Peripherals	d__Bacteria; p__Actinobacteriota; c__Actinobacteria; o__Corynebacteriales; f__Mycobacteriaceae; g__Mycobacterium
bASV1226	319	0.452584	3858.43	1.71102	0.253508	Peripherals	d__Bacteria; p__Acidobacteriota; c__Acidobacteriae; o__Acidobacteriales; f__Koribacteraceae; g__Candidatus_Koribacter; s__uncultured_bacterium
bASV1228	296	0.442346	1141.99	1.50702	0	Peripherals	d__Bacteria; p__Proteobacteria; c__Alphaproteobacteria; o__Micropepsales; f__Micropepsaceae; g__uncultured
bASV1229	5	0.292011	0.331723	-1.07399	0	Peripherals	d__Bacteria; p__Firmicutes; c__Bacilli; o__Paenibacillales; f__Paenibacillaceae; g__Paenibacillus
bASV123	38	0.357346	4027.61	-0.781298	0	Peripherals	d__Bacteria; p__Proteobacteria; c__Alphaproteobacteria; o__Sphingomonadales; f__Sphingomonadaceae; g__Sphingomonas
bASV1230	12	0.347901	5.34551	-0.978706	0	Peripherals	d__Bacteria; p__Verrucomicrobiota; c__Verrucomicrobiae; o__Pedosphaerales; f__Pedosphaeraceae; g__uncultured
bASV1231	152	0.413637	3793.3	0.03759	0	Peripherals	d__Bacteria; p__Actinobacteriota; c__Thermoleophilia; o__uncultured; f__uncultured; g__uncultured; s__uncultured_bacterium
bASV1232	247	0.402157	426.068	0.727219	0	Peripherals	d__Bacteria; p__Acidobacteriota; c__Subgroup_5; o__Subgroup_5; f__Subgroup_5; g__Subgroup_5; s__uncultured_bacterium
bASV1233	127	0.38	29.0072	0.00808343	0.298364	Peripherals	d__Bacteria; p__Proteobacteria; c__Alphaproteobacteria; o__Rhizobiales; f__Xanthobacteraceae; g__uncultured
bASV1234	11	0.312055	6.69922	-1.02077	0	Peripherals	d__Bacteria; p__Actinobacteriota; c__Actinobacteria; o__Propionibacteriales; f__Nocardioidaceae; g__Nocardioides
bASV1235	98	0.369677	105.304	-0.35441	0.0810677	Peripherals	d__Bacteria; p__Actinobacteriota; c__Thermoleophilia; o__Gaiellales; f__Gaiellaceae; g__Gaiella
bASV1237	303	0.438303	761.666	1.56911	0.190305	Peripherals	d__Bacteria; p__Gemmatimonadota; c__Gemmatimonadetes; o__Gemmatimonadales; f__Gemmatimonadaceae; g__uncultured; s__uncultured_Gemmatimonadetes
bASV1238	351	0.445181	1407.96	1.48218	0.0370239	Peripherals	d__Bacteria; p__Proteobacteria; c__Alphaproteobacteria; o__Sphingomonadales; f__Sphingomonadaceae; g__Altererythrobacter; s__metagenome
bASV124	550	0.509615	25746.7	2.92677	0.138115	Module hubs	d__Bacteria; p__Actinobacteriota; c__Thermoleophilia; o__Gaiellales; f__uncultured; g__uncultured; s__uncultured_prokaryote
bASV1240	272	0.420899	439.058	0.9087	0.35518	Peripherals	d__Bacteria; p__Myxococcota; c__bacteriap25; o__bacteriap25; f__bacteriap25; g__bacteriap25; s__uncultured_soil
bASV1241	298	0.416891	707.919	1.52476	0	Peripherals	d__Bacteria; p__Verrucomicrobiota; c__Verrucomicrobiae; o__Pedosphaerales; f__Pedosphaeraceae; g__ADurb.Bin063-1; s__uncultured_bacterium
bASV1242	1	1	0	0	0	Peripherals	d__Bacteria; p__Actinobacteriota; c__Thermoleophilia; o__Gaiellales; f__uncultured; g__uncultured; s__uncultured_soil
bASV1243	380	0.463201	6044.47	2.25205	0	Peripherals	d__Bacteria; p__Planctomycetota; c__vadinHA49; o__vadinHA49; f__vadinHA49; g__vadinHA49; s__uncultured_Planctomycetaceae
bASV1244	371	0.46502	4894.09	1.62737	0.0160417	Peripherals	d__Bacteria; p__Proteobacteria; c__Gammaproteobacteria; o__Steroidobacterales; f__Steroidobacteraceae; g__uncultured
bASV1245	172	0.424626	783.291	0.182775	0	Peripherals	d__Bacteria; p__MBNT15; c__MBNT15; o__MBNT15; f__MBNT15; g__MBNT15
bASV1246	1	0.258338	0	-1.05856	0	Peripherals	d__Bacteria; p__Proteobacteria; c__Alphaproteobacteria; o__Rhizobiales; f__Rhizobiaceae; g__Allorhizobium-Neorhizobium-Pararhizobium-Rhizobium
bASV1247	218	0.396223	4243.58	0.815203	0	Peripherals	d__Bacteria; p__Actinobacteriota; c__Actinobacteria; o__Frankiales; f__Acidothermaceae; g__Acidothermus; s__uncultured_bacterium
bASV1248	14	0.346644	0.809521	-0.964187	0	Peripherals	d__Bacteria; p__Proteobacteria; c__Alphaproteobacteria; o__Rhizobiales; f__Rhizobiaceae; g__Allorhizobium-Neorhizobium-Pararhizobium-Rhizobium
bASV1249	324	0.450559	2295.7	1.28618	0	Peripherals	d__Bacteria; p__Acidobacteriota; c__Acidobacteriae; o__Acidobacteriae; f__Acidobacteriae; g__Paludibaculum; s__metagenome
bASV125	201	0.446266	1792.69	0.393293	0.0285654	Peripherals	d__Bacteria; p__Actinobacteriota; c__Thermoleophilia; o__Solirubrobacterales; f__Solirubrobacteraceae; g__Solirubrobacter; s__metagenome
bASV1251	73	0.394592	23.5496	-0.535891	0.0104709	Peripherals	d__Bacteria; p__Actinobacteriota; c__Actinobacteria; o__Micromonosporales; f__Micromonosporaceae; g__Rhizocola
bASV1255	126	0.389329	92.733	-0.151151	0.150584	Peripherals	d__Bacteria; p__Proteobacteria; c__Gammaproteobacteria
bASV1256	233	0.448452	969.605	0.62559	0.0115603	Peripherals	d__Bacteria; p__NB1-j; c__NB1-j; o__NB1-j; f__NB1-j; g__NB1-j; s__uncultured_Desulfoglaeba
bASV1259	133	0.410518	831.735	-0.100336	0	Peripherals	d__Bacteria; p__Proteobacteria; c__Gammaproteobacteria; o__Xanthomonadales; f__Rhodanobacteraceae; g__Ahniella; s__uncultured_Xanthomonadaceae
bASV126	337	0.45804	3466.91	1.87067	0	Peripherals	d__Bacteria; p__Chloroflexi; c__TK10; o__TK10; f__TK10; g__TK10
bASV1260	182	0.384278	322.475	0.495903	0	Peripherals	d__Bacteria; p__Proteobacteria; c__Gammaproteobacteria; o__Xanthomonadales; f__Rhodanobacteraceae
bASV1261	223	0.394052	1616.53	0.859551	0	Peripherals	d__Bacteria; p__Acidobacteriota; c__Subgroup_5; o__Subgroup_5; f__Subgroup_5; g__Subgroup_5; s__uncultured_bacterium
bASV1262	128	0.408519	1184.28	0.0169529	0	Peripherals	d__Bacteria; p__Proteobacteria; c__Alphaproteobacteria; o__Rhizobiales; f__Rhizobiales_Incertae_Sedis; g__Bauldia; s__uncultured_bacterium
bASV1264	248	0.409766	161.46	1.08129	0	Peripherals	d__Bacteria; p__Acidobacteriota; c__Acidobacteriae; o__Acidobacteriales; f__uncultured; g__uncultured
bASV1265	104	0.356019	44.2406	-0.195914	0	Peripherals	d__Bacteria; p__Acidobacteriota; c__Acidobacteriae; o__Subgroup_2; f__Subgroup_2; g__Subgroup_2; s__uncultured_Acidobacteria
bASV1266	95	0.378358	1218.85	-0.275739	0	Peripherals	d__Bacteria; p__Actinobacteriota; c__Thermoleophilia; o__Solirubrobacterales; f__Solirubrobacteraceae; g__Conexibacter; s__uncultured_bacterium
bASV1267	88	0.398496	602.626	-0.427002	0.197531	Peripherals	d__Bacteria; p__Actinobacteriota; c__Actinobacteria; o__Propionibacteriales; f__Nocardioidaceae
bASV127	85	0.391753	914.515	-0.364434	0	Peripherals	d__Bacteria; p__Actinobacteriota; c__Acidimicrobiia; o__IMCC26256; f__IMCC26256; g__IMCC26256; s__uncultured_Ferrimicrobium
bASV1270	295	0.438303	1599.34	1.49815	0	Peripherals	d__Bacteria; p__Acidobacteriota; c__Acidobacteriae; o__Acidobacteriales; f__Koribacteraceae; g__Candidatus_Koribacter; s__uncultured_bacterium
bASV1272	111	0.391676	7.0942	-0.260039	0	Peripherals	d__Bacteria; p__Proteobacteria; c__Gammaproteobacteria; o__Burkholderiales; f__Comamonadaceae
bASV1277	94	0.358427	295.586	-0.284608	0	Peripherals	d__Bacteria; p__Acidobacteriota; c__Acidobacteriae; o__Acidobacteriales; f__uncultured; g__uncultured
bASV128	242	0.460133	3192.57	0.690923	0.216701	Peripherals	d__Bacteria; p__Desulfobacterota; c__uncultured; o__uncultured; f__uncultured; g__uncultured; s__metagenome
bASV1281	6	0.295092	2501.83	0.00762408	0.125596	Peripherals	d__Bacteria; p__Acidobacteriota; c__Acidobacteriae; o__Acidobacteriales; f__uncultured; g__uncultured
bASV1284	47	0.387308	39.3341	-0.724632	0	Peripherals	d__Bacteria; p__Actinobacteriota; c__Thermoleophilia; o__Gaiellales; f__Gaiellaceae; g__Gaiella; s__uncultured_actinobacterium
bASV1285	2	0.307059	1.07243	-1.1006	0.471486	Peripherals	d__Bacteria; p__Myxococcota; c__Polyangia; o__Haliangiales; f__Haliangiaceae; g__Haliangium; s__uncultured_Myxococcales
bASV1287	9	0.307059	2022.29	-1.00048	0	Peripherals	d__Bacteria; p__Acidobacteriota; c__Acidobacteriae; o__Acidobacteriae; f__Acidobacteriae; g__Paludibaculum; s__metagenome
bASV1288	79	0.390234	53.1364	-0.492336	0.014814	Peripherals	d__Bacteria; p__Proteobacteria; c__Alphaproteobacteria; o__Sphingomonadales; f__Sphingomonadaceae; g__Sphingomonas; s__Sphingomonas_soli
bASV1289	21	0.34275	1.39196	-0.913372	0	Peripherals	d__Bacteria; p__Actinobacteriota; c__Actinobacteria; o__Micrococcales; f__Micrococcaceae; g__Pseudarthrobacter; s__Pseudarthrobacter_defluvii
bASV129	490	0.496304	12039.3	2.49122	0	Peripherals	d__Bacteria; p__Proteobacteria; c__Alphaproteobacteria; o__Sphingomonadales; f__Sphingomonadaceae; g__Sphingomonas
bASV1290	76	0.375606	456.737	-0.514113	0.0525931	Peripherals	d__Bacteria; p__Actinobacteriota; c__Actinobacteria; o__Propionibacteriales; f__Nocardioidaceae; g__Nocardioides
bASV1291	22	0.351913	13.7746	-0.923209	0	Peripherals	d__Bacteria; p__Actinobacteriota; c__Thermoleophilia; o__Gaiellales; f__uncultured; g__uncultured; s__uncultured_Solirubrobacter
bASV1293	19	0.332179	17.3247	-0.949817	0	Peripherals	d__Bacteria; p__Proteobacteria; c__Alphaproteobacteria; o__Rhizobiales; f__Labraceae; g__Labrys
bASV1294	163	0.416891	715.484	0.117442	0	Peripherals	d__Bacteria; p__Actinobacteriota; c__Thermoleophilia; o__Gaiellales; f__uncultured; g__uncultured
bASV1295	9	0.326101	0.0232221	-1.03851	0.129402	Peripherals	d__Bacteria; p__Actinobacteriota; c__Actinobacteria; o__Frankiales; f__Acidothermaceae; g__Acidothermus; s__uncultured_bacterium
bASV1296	17	0.342052	92.8043	-0.967556	0	Peripherals	d__Bacteria; p__Proteobacteria; c__Alphaproteobacteria; o__Acetobacterales; f__Acetobacteraceae; g__uncultured
bASV1298	96	0.386713	87.2179	-0.368928	0.30839	Peripherals	d__Bacteria; p__Proteobacteria; c__Gammaproteobacteria; o__Steroidobacterales; f__Steroidobacteraceae; g__Steroidobacter
bASV1299	2	0.288828	0	-1.0513	0	Peripherals	d__Bacteria; p__Proteobacteria; c__Alphaproteobacteria; o__Rhizobiales; f__Xanthobacteraceae; g__Rhodoplanes
bASV13	12	0.252825	11847.5	1.7044	0.202449	Peripherals	d__Bacteria; p__Proteobacteria; c__Gammaproteobacteria; o__Enterobacterales; f__Enterobacteriaceae
bASV1300	230	0.424447	434.127	0.603812	0	Peripherals	d__Bacteria; p__Chloroflexi; c__Chloroflexia; o__Chloroflexales; f__Roseiflexaceae; g__uncultured; s__uncultured_Chloroflexi
bASV1301	349	0.425433	3026.39	1.46766	0	Peripherals	d__Bacteria; p__Proteobacteria; c__Gammaproteobacteria; o__Burkholderiales; f__Nitrosomonadaceae; g__Ellin6067
bASV1302	4	0.324263	0.107198	-1.08286	0.062435	Peripherals	d__Bacteria; p__Myxococcota; c__bacteriap25; o__bacteriap25; f__bacteriap25; g__bacteriap25; s__uncultured_Syntrophobacterales
bASV1304	98	0.379642	602.786	-0.249131	0	Peripherals	d__Bacteria; p__Proteobacteria; c__Alphaproteobacteria; o__Dongiales; f__Dongiaceae; g__Dongia; s__uncultured_Rhodospirillaceae
bASV1305	371	0.458665	5017.8	2.17223	0	Peripherals	d__Bacteria; p__Acidobacteriota; c__Subgroup_5; o__Subgroup_5; f__Subgroup_5; g__Subgroup_5
bASV1306	176	0.413807	370.252	0.211812	0	Peripherals	d__Bacteria; p__Proteobacteria; c__Alphaproteobacteria; o__Rhizobiales; f__Xanthobacteraceae; g__uncultured
bASV1307	51	0.346584	19.4462	-0.665995	0	Peripherals	d__Bacteria; p__Acidobacteriota; c__Acidobacteriae; o__Acidobacteriales; f__Acidobacteriaceae_(Subgroup_1); g__Occallatibacter
bASV1308	149	0.362818	137.185	0.203211	0.0587695	Peripherals	d__Bacteria; p__Acidobacteriota; c__Acidobacteriae; o__Acidobacteriales; f__Acidobacteriaceae_(Subgroup_1); g__uncultured
bASV131	419	0.491579	8253.1	1.97581	0.0587695	Peripherals	d__Bacteria; p__Actinobacteriota; c__Thermoleophilia; o__Solirubrobacterales; f__67-14; g__67-14
bASV1311	24	0.325627	369.472	-0.90547	0.12286	Peripherals	d__Bacteria; p__RCP2-54; c__RCP2-54; o__RCP2-54; f__RCP2-54; g__RCP2-54
bASV1312	307	0.44371	907.394	1.60458	0	Peripherals	d__Bacteria; p__RCP2-54; c__RCP2-54; o__RCP2-54; f__RCP2-54; g__RCP2-54; s__uncultured_bacterium
bASV1316	236	0.414233	945.778	0.974854	0	Peripherals	d__Bacteria; p__Acidobacteriota; c__Acidobacteriae; o__Acidobacteriales; f__Acidobacteriaceae_(Subgroup_1); g__Edaphobacter
bASV1318	388	0.478044	7453.6	1.75077	0.237812	Peripherals	d__Bacteria; p__Actinobacteriota; c__Actinobacteria; o__Micrococcales; f__Microbacteriaceae; g__Agromyces
bASV1319	233	0.427147	1066.46	0.62559	0.0753556	Peripherals	d__Bacteria; p__Bacteroidota; c__Bacteroidia; o__Cytophagales; f__Hymenobacteraceae; g__Adhaeribacter
bASV132	351	0.459084	6415.62	1.99484	0	Peripherals	d__Bacteria; p__Proteobacteria; c__Alphaproteobacteria; o__Rhizobiales; f__Xanthobacteraceae; g__uncultured; s__uncultured_Pseudolabrys
bASV1320	5	0.330923	0	-1.02952	0	Peripherals	d__Bacteria; p__Actinobacteriota; c__Actinobacteria; o__Micromonosporales; f__Micromonosporaceae
bASV1322	103	0.367921	583.546	-0.204783	0	Peripherals	d__Bacteria; p__Acidobacteriota; c__Subgroup_11; o__Subgroup_11; f__Subgroup_11; g__Subgroup_11; s__uncultured_bacterium
bASV1323	133	0.409599	4007.92	-0.100336	0.0114282	Peripherals	d__Bacteria; p__Actinobacteriota; c__Actinobacteria; o__Propionibacteriales; f__Nocardioidaceae; g__Nocardioides
bASV1325	10	0.324682	0.232492	-1.02964	0.099723	Peripherals	d__Bacteria; p__Actinobacteriota; c__Actinobacteria; o__Streptomycetales; f__Streptomycetaceae; g__Streptomyces
bASV1326	7	0.336059	0	-1.015	0	Peripherals	d__Bacteria; p__Actinobacteriota; c__Actinobacteria; o__Streptomycetales; f__Streptomycetaceae; g__Streptomyces
bASV1327	95	0.388428	1282.94	-0.275739	0.0158093	Peripherals	d__Bacteria; p__Actinobacteriota; c__Thermoleophilia; o__uncultured; f__uncultured; g__uncultured; s__uncultured_bacterium
bASV1328	17	0.32152	844.619	-0.942409	0	Peripherals	d__Bacteria; p__Bacteroidota; c__Bacteroidia; o__Chitinophagales; f__Chitinophagaceae; g__Aurantisolimonas; s__uncultured_bacterium
bASV1329	428	0.481013	4553.01	2.04114	0	Peripherals	d__Bacteria; p__Actinobacteriota; c__MB-A2-108; o__MB-A2-108; f__MB-A2-108; g__MB-A2-108; s__uncultured_bacterium
bASV133	494	0.493627	8105.01	2.52025	0	Module hubs	d__Bacteria; p__Proteobacteria; c__Alphaproteobacteria; o__Rhizobiales; f__Xanthobacteraceae; g__Pseudorhodoplanes
bASV1330	182	0.418885	2461.16	0.255368	0	Peripherals	d__Bacteria; p__Actinobacteriota; c__Actinobacteria; o__Frankiales; f__Sporichthyaceae; g__uncultured; s__uncultured_bacterium
bASV1331	76	0.361061	4.38383	-0.514113	0	Peripherals	d__Bacteria; p__Gemmatimonadota; c__Gemmatimonadetes; o__Gemmatimonadales; f__Gemmatimonadaceae
bASV1332	117	0.378074	1184.25	-0.0806111	0	Peripherals	d__Bacteria; p__Actinobacteriota; c__MB-A2-108; o__MB-A2-108; f__MB-A2-108; g__MB-A2-108
bASV1333	19	0.357854	2081.65	-0.927891	0	Peripherals	d__Bacteria; p__Proteobacteria; c__Alphaproteobacteria; o__Rhizobiales; f__Rhizobiales_Incertae_Sedis; g__Nordella; s__uncultured_bacterium
bASV1334	167	0.397082	105.411	0.146479	0	Peripherals	d__Bacteria; p__Proteobacteria; c__Gammaproteobacteria; o__Burkholderiales; f__TRA3-20; g__TRA3-20; s__uncultured_gamma
bASV1335	20	0.338772	1.02285	-0.940948	0.0235261	Peripherals	d__Bacteria; p__Acidobacteriota; c__Acidobacteriae; o__Bryobacterales; f__Bryobacteraceae; g__Bryobacter
bASV1336	135	0.392058	1837.45	-0.0858173	0.0747531	Peripherals	d__Bacteria; p__Actinobacteriota; c__Thermoleophilia; o__Gaiellales; f__Gaiellaceae; g__Gaiella
bASV1337	122	0.357029	281.513	-0.0362638	0	Peripherals	d__Bacteria; p__Acidobacteriota; c__Acidobacteriae; o__Acidobacteriales; f__uncultured; g__uncultured
bASV1338	156	0.427873	238.161	0.066627	0	Peripherals	d__Bacteria; p__Armatimonadota; c__Fimbriimonadia; o__Fimbriimonadales; f__Fimbriimonadaceae; g__Fimbriimonadaceae; s__uncultured_Armatimonadetes
bASV1339	144	0.397631	172.801	-0.020484	0	Peripherals	d__Bacteria; p__Gemmatimonadota; c__Gemmatimonadetes; o__Gemmatimonadales; f__Gemmatimonadaceae; g__uncultured; s__metagenome
bASV134	332	0.463842	2170.22	1.34426	0	Peripherals	d__Bacteria; p__Actinobacteriota; c__Thermoleophilia; o__Gaiellales; f__Gaiellaceae; g__Gaiella
bASV1342	86	0.369541	1432.58	-0.441521	0	Peripherals	d__Bacteria; p__Actinobacteriota; c__Actinobacteria; o__Pseudonocardiales; f__Pseudonocardiaceae
bASV1344	134	0.407692	1390.9	-0.0930766	0.132653	Peripherals	d__Bacteria; p__MBNT15; c__MBNT15; o__MBNT15; f__MBNT15; g__MBNT15; s__uncultured_bacterium
bASV1345	3	1	2	1.22474	0.0268407	Peripherals	d__Bacteria; p__Proteobacteria; c__Alphaproteobacteria; o__Rhizobiales; f__Rhizobiaceae; g__Allorhizobium-Neorhizobium-Pararhizobium-Rhizobium
bASV1346	2	0.309418	0	-1.0513	0.119681	Peripherals	d__Bacteria; p__Actinobacteriota; c__Actinobacteria; o__Streptomycetales; f__Streptomycetaceae; g__Streptomyces
bASV1347	4	0.253748	41.6953	-1.08286	0	Peripherals	d__Bacteria; p__Actinobacteriota; c__Actinobacteria; o__Micrococcales; f__Intrasporangiaceae; g__Intrasporangium
bASV1348	2	0.281797	57.7959	-0.724288	0	Peripherals	d__Bacteria; p__Proteobacteria; c__Gammaproteobacteria; o__Burkholderiales; f__Comamonadaceae; g__Comamonas; s__metagenome
bASV1349	26	0.376519	0.449185	-0.877076	0.0668095	Peripherals	d__Bacteria; p__Latescibacterota; c__Latescibacterota; o__Latescibacterota; f__Latescibacterota; g__Latescibacterota; s__uncultured_soil
bASV135	16	0.3599	95.7017	-0.949669	0	Peripherals	d__Bacteria; p__Actinobacteriota; c__Thermoleophilia; o__Solirubrobacterales; f__67-14; g__67-14
bASV1351	93	0.374558	73.8503	-0.293478	0	Peripherals	d__Bacteria; p__Acidobacteriota; c__Thermoanaerobaculia; o__Thermoanaerobaculales; f__Thermoanaerobaculaceae; g__Subgroup_10
bASV1352	195	0.373586	168.189	0.611206	0.641975	Connectors	d__Bacteria; p__Actinobacteriota; c__Actinobacteria; o__Frankiales; f__Frankiaceae; g__Jatrophihabitans
bASV1353	138	0.377154	798.583	0.105647	0	Peripherals	d__Bacteria; p__Actinobacteriota; c__Actinobacteria; o__Propionibacteriales; f__Nocardioidaceae; g__Nocardioides; s__Marmoricola_sp.
bASV1354	2	0.240736	17.6356	-1.1006	0.0570934	Peripherals	d__Bacteria; p__Actinobacteriota; c__Actinobacteria; o__Micrococcales; f__Intrasporangiaceae
bASV1356	1	0.234814	0	-0.707107	0	Peripherals	d__Bacteria; p__Proteobacteria; c__Gammaproteobacteria; o__Gammaproteobacteria_Incertae_Sedis; f__Unknown_Family; g__Acidibacter
bASV1357	5	0.335052	0.0441383	-1.02952	0	Peripherals	d__Bacteria; p__Chloroflexi; c__TK10; o__TK10; f__TK10; g__TK10; s__uncultured_Dehalococcoidia
bASV1358	101	0.407857	1256.37	-0.332632	0.1437	Peripherals	d__Bacteria; p__Bacteroidota; c__Bacteroidia; o__Cytophagales; f__Microscillaceae; g__Chryseolinea
bASV1359	57	0.344568	21.5375	-0.612778	0.0726237	Peripherals	d__Bacteria; p__Actinobacteriota; c__MB-A2-108; o__MB-A2-108; f__MB-A2-108; g__MB-A2-108; s__uncultured_actinobacterium
bASV136	373	0.470012	4572.84	2.18997	0	Peripherals	d__Bacteria; p__Actinobacteriota; c__Thermoleophilia; o__Solirubrobacterales; f__Solirubrobacteraceae; g__Conexibacter
bASV1360	103	0.386787	980.291	-0.204783	0.022469	Peripherals	d__Bacteria; p__Actinobacteriota; c__Actinobacteria; o__Propionibacteriales; f__Nocardioidaceae; g__Nocardioides
bASV1362	372	0.461186	1756.73	1.63463	0	Peripherals	d__Bacteria; p__Actinobacteriota; c__Acidimicrobiia; o__Microtrichales; f__Ilumatobacteraceae; g__uncultured; s__uncultured_bacterium
bASV1363	144	0.417323	876.089	-0.020484	0.193429	Peripherals	d__Bacteria; p__Actinobacteriota; c__Thermoleophilia; o__Gaiellales; f__uncultured; g__uncultured
bASV1365	361	0.440315	2776.14	1.55477	0	Peripherals	d__Bacteria; p__Actinobacteriota; c__Thermoleophilia; o__Gaiellales; f__uncultured; g__uncultured
bASV1366	217	0.418276	686.558	0.806334	0	Peripherals	d__Bacteria; p__Myxococcota; c__Polyangia; o__Haliangiales; f__Haliangiaceae; g__Haliangium; s__uncultured_proteobacterium
bASV1368	123	0.402961	206.489	-0.172928	0	Peripherals	d__Bacteria; p__Actinobacteriota; c__Actinobacteria; o__Micrococcales; f__Promicromonosporaceae; g__Cellulosimicrobium
bASV1369	2	0.30423	0	-1.0513	0.493827	Peripherals	d__Bacteria; p__Actinobacteriota; c__Actinobacteria; o__Propionibacteriales; f__Nocardioidaceae; g__Nocardioides
bASV137	302	0.444395	931.445	1.12648	0	Peripherals	d__Bacteria; p__Actinobacteriota; c__Actinobacteria; o__Propionibacteriales; f__Nocardioidaceae; g__Nocardioides
bASV1370	205	0.406294	6437.39	0.699901	0.232988	Peripherals	d__Bacteria; p__Actinobacteriota; c__Thermoleophilia; o__Gaiellales; f__uncultured; g__uncultured; s__metagenome
bASV1371	1	0.234951	0	-1.05856	0.0699714	Peripherals	d__Bacteria; p__Chloroflexi; c__AD3; o__AD3; f__AD3; g__AD3; s__uncultured_Chloroflexi
bASV1372	4	0.276648	13.6988	-0.116128	0.275391	Peripherals	d__Bacteria; p__Firmicutes; c__Clostridia; o__Peptostreptococcales-Tissierellales; f__Peptostreptococcaceae; g__Romboutsia
bASV1373	19	0.315674	2658.33	-0.949817	0	Peripherals	d__Bacteria; p__Actinobacteriota; c__Actinobacteria; o__Propionibacteriales; f__Nocardioidaceae; g__Nocardioides
bASV1374	53	0.344863	363.495	-0.648256	0	Peripherals	d__Bacteria; p__Actinobacteriota; c__Actinobacteria; o__Propionibacteriales; f__Nocardioidaceae; g__Nocardioides
bASV1375	23	0.348383	402.911	3.11825	0	Module hubs	d__Bacteria; p__Actinobacteriota; c__Thermoleophilia; o__Solirubrobacterales; f__67-14; g__67-14; s__uncultured_Conexibacteraceae
bASV1376	200	0.413977	1113.29	0.655553	0.180965	Peripherals	d__Bacteria; p__Acidobacteriota; c__Acidobacteriae; o__Acidobacteriales; f__uncultured; g__uncultured
bASV1377	93	0.397317	432.16	-0.390706	0	Peripherals	d__Bacteria; p__Proteobacteria; c__Gammaproteobacteria; o__Burkholderiales; f__Comamonadaceae
bASV1379	169	0.385972	468.521	0.3806	0.133092	Peripherals	d__Bacteria; p__Acidobacteriota; c__Acidobacteriae; o__Acidobacteriales; f__uncultured; g__uncultured
bASV138	155	0.418363	432.756	0.0593678	0	Peripherals	d__Bacteria; p__Actinobacteriota; c__Actinobacteria; o__Corynebacteriales; f__Mycobacteriaceae; g__Mycobacterium
bASV1380	222	0.382308	292.06	0.850681	0.458983	Peripherals	d__Bacteria; p__Proteobacteria; c__Alphaproteobacteria; o__uncultured; f__uncultured; g__uncultured
bASV1381	407	0.474441	5944.4	1.8887	0.0540123	Peripherals	d__Bacteria; p__Actinobacteriota; c__Acidimicrobiia; o__IMCC26256; f__IMCC26256; g__IMCC26256
bASV1382	156	0.412874	222.492	0.066627	0	Peripherals	d__Bacteria; p__Myxococcota; c__bacteriap25; o__bacteriap25; f__bacteriap25; g__bacteriap25; s__uncultured_Syntrophobacterales
bASV1385	16	0.356776	42.24	-0.0246857	0.0665874	Peripherals	d__Bacteria; p__Proteobacteria; c__Alphaproteobacteria; o__Rhizobiales; f__Devosiaceae; g__Devosia
bASV1388	24	0.318721	4.61979	-0.90547	0.0798611	Peripherals	d__Bacteria; p__Proteobacteria; c__Gammaproteobacteria; o__Burkholderiales; f__B1-7BS; g__B1-7BS; s__uncultured_bacterium
bASV1389	22	0.331468	6.69513	-0.923209	0.277778	Peripherals	d__Bacteria; p__Gemmatimonadota; c__Gemmatimonadetes; o__Gemmatimonadales; f__Gemmatimonadaceae; g__Gemmatimonas
bASV139	97	0.396145	729.275	-0.258	0.0665874	Peripherals	d__Bacteria; p__Actinobacteriota; c__Thermoleophilia; o__Solirubrobacterales; f__67-14; g__67-14
bASV1392	4	0.301632	0.448783	-1.03678	0	Peripherals	d__Bacteria; p__Proteobacteria; c__Gammaproteobacteria; o__Burkholderiales; f__Methylophilaceae
bASV1393	9	0.337128	0.16135	-1.00048	0.0665874	Peripherals	d__Bacteria; p__Acidobacteriota; c__Thermoanaerobaculia; o__Thermoanaerobaculales; f__Thermoanaerobaculaceae; g__Subgroup_10
bASV1396	195	0.419583	473.239	0.349738	0	Peripherals	d__Bacteria; p__Actinobacteriota; c__Thermoleophilia; o__Solirubrobacterales; f__Solirubrobacteraceae
bASV1397	1	0.309465	0	-1.05856	0	Peripherals	d__Bacteria; p__Acidobacteriota; c__Subgroup_5; o__Subgroup_5; f__Subgroup_5; g__Subgroup_5; s__uncultured_bacterium
bASV140	10	0.352221	0.673207	-0.993224	0	Peripherals	d__Bacteria; p__Proteobacteria; c__Alphaproteobacteria; o__Rhizobiales; f__Rhizobiaceae; g__Allorhizobium-Neorhizobium-Pararhizobium-Rhizobium
bASV1402	263	0.382091	170.552	1.21433	0.155623	Peripherals	d__Bacteria; p__Acidobacteriota; c__Acidobacteriae; o__Acidobacteriales; f__Acidobacteriaceae_(Subgroup_1); g__Occallatibacter
bASV1403	36	0.351975	5.71653	-0.799037	0	Peripherals	d__Bacteria; p__Proteobacteria; c__Gammaproteobacteria; o__Xanthomonadales; f__Rhodanobacteraceae
bASV1405	454	0.485184	6333.13	2.22988	0	Peripherals	d__Bacteria; p__Verrucomicrobiota; c__Verrucomicrobiae; o__Pedosphaerales; f__Pedosphaeraceae; g__Pedosphaeraceae
bASV14085	2	0.334885	0	-1.0513	0.00662244	Peripherals	d__Bacteria; p__Proteobacteria; c__Alphaproteobacteria
bASV141	3	0.324996	0	-1.04404	0.0206163	Peripherals	d__Bacteria; p__Actinobacteriota; c__Actinobacteria; o__Micrococcales; f__Micrococcaceae
bASV1410	37	0.357092	42.0487	-0.790167	0	Peripherals	d__Bacteria; p__Proteobacteria; c__Gammaproteobacteria; o__Xanthomonadales; f__Rhodanobacteraceae; g__Dokdonella
bASV1411	102	0.401836	163.609	-0.325373	0.0517768	Peripherals	d__Bacteria; p__Proteobacteria; c__Gammaproteobacteria; o__Cellvibrionales; f__Halieaceae; g__OM60(NOR5)_clade
bASV1412	545	0.491699	17489.4	2.89048	0	Module hubs	d__Bacteria; p__Proteobacteria; c__Gammaproteobacteria; o__CCM19a; f__CCM19a; g__CCM19a; s__uncultured_soil
bASV1414	435	0.469354	4814.29	2.09196	0	Peripherals	d__Bacteria; p__Actinobacteriota; c__Acidimicrobiia; o__Microtrichales; f__uncultured; g__uncultured
bASV1415	172	0.396769	2551.62	0.182775	0.396694	Peripherals	d__Bacteria; p__Proteobacteria; c__Gammaproteobacteria; o__Cellvibrionales; f__Halieaceae; g__OM60(NOR5)_clade
bASV1416	87	0.355391	52.1881	-0.346695	0	Peripherals	d__Bacteria; p__Acidobacteriota; c__Acidobacteriae; o__Acidobacteriales; f__uncultured; g__uncultured; s__uncultured_Acidobacteriaceae
bASV1417	220	0.41845	264.834	0.832942	0.0980975	Peripherals	d__Bacteria; p__Proteobacteria; c__Alphaproteobacteria; o__Rhizobiales; f__Xanthobacteraceae; g__uncultured; s__uncultured_Methylocystaceae
bASV1418	4	0.286486	0	-1.03678	0.0110494	Peripherals	d__Bacteria; p__Chloroflexi; c__Chloroflexia; o__Chloroflexales; f__Roseiflexaceae; g__uncultured
bASV142	447	0.489191	12230.2	2.84631	0	Module hubs	d__Bacteria; p__Acidobacteriota; c__Acidobacteriae; o__Acidobacteriales; f__uncultured; g__uncultured
bASV1420	208	0.398654	401.321	0.726509	0.0285654	Peripherals	d__Bacteria; p__Proteobacteria; c__Alphaproteobacteria; o__Acetobacterales; f__Acetobacteraceae; g__uncultured
bASV1423	180	0.423643	289.388	0.240849	0.0110494	Peripherals	d__Bacteria; p__Actinobacteriota; c__Actinobacteria; o__Micrococcales; f__Promicromonosporaceae; g__Promicromonospora
bASV1424	157	0.39529	42.1366	0.0738863	0.498707	Peripherals	d__Bacteria; p__Proteobacteria; c__Gammaproteobacteria; o__Burkholderiales; f__Comamonadaceae
bASV1425	292	0.433958	761.169	1.47154	0	Peripherals	d__Bacteria; p__Acidobacteriota; c__Acidobacteriae; o__Acidobacteriales; f__Koribacteraceae; g__Candidatus_Koribacter; s__uncultured_bacterium
bASV1429	27	0.349289	63.8385	-0.878862	0	Peripherals	d__Bacteria; p__Actinobacteriota; c__Actinobacteria; o__Frankiales; f__Frankiales; g__Frankiales; s__uncultured_bacterium
bASV143	76	0.405639	4485.73	-0.514113	0	Peripherals	d__Bacteria; p__Bacteroidota; c__Bacteroidia; o__Chitinophagales; f__Chitinophagaceae; g__Terrimonas
bASV1430	412	0.471552	5172.38	1.925	0	Peripherals	d__Bacteria; p__Acidobacteriota; c__Thermoanaerobaculia; o__Thermoanaerobaculales; f__Thermoanaerobaculaceae; g__Subgroup_10
bASV1432	234	0.433118	874.798	0.632849	0	Peripherals	d__Bacteria; p__Actinobacteriota; c__Acidimicrobiia; o__Microtrichales; f__Iamiaceae; g__Iamia; s__metagenome
bASV1435	11	0.343921	0.885158	-0.985965	0.4608	Peripherals	d__Bacteria; p__Proteobacteria; c__Alphaproteobacteria; o__Rhizobiales; f__uncultured; g__uncultured
bASV1437	495	0.486004	8566.98	2.52751	0	Module hubs	d__Bacteria; p__Actinobacteriota; c__Acidimicrobiia; o__Microtrichales
bASV1438	3	0.264097	2013	-1.09173	0	Peripherals	d__Bacteria; p__Acidobacteriota; c__Acidobacteriae; o__Acidobacteriales; f__Acidobacteriaceae_(Subgroup_1); g__Terriglobus; s__Terriglobus_albidus
bASV1439	99	0.364327	523.726	-0.240261	0.18	Peripherals	d__Bacteria; p__Actinobacteriota; c__Actinobacteria; o__Propionibacteriales; f__Nocardioidaceae; g__Nocardioides
bASV144	359	0.472437	5324.35	1.54026	0	Peripherals	d__Bacteria; p__Actinobacteriota; c__Actinobacteria; o__Micrococcales; f__Microbacteriaceae; g__Microbacterium
bASV1440	220	0.433865	1157.52	0.531219	0	Peripherals	d__Bacteria; p__Proteobacteria; c__Alphaproteobacteria; o__Rhizobiales; f__Rhizobiales_Incertae_Sedis; g__Bauldia; s__uncultured_bacterium
bASV1441	1	0.264513	0	-1.05856	0.173155	Peripherals	d__Bacteria; p__Actinobacteriota; c__Actinobacteria; o__Propionibacteriales; f__Nocardioidaceae; g__Nocardioides
bASV1442	277	0.429333	1103.91	1.3385	0	Peripherals	d__Bacteria; p__Verrucomicrobiota; c__Verrucomicrobiae; o__Pedosphaerales; f__Pedosphaeraceae; g__ADurb.Bin063-1
bASV1445	141	0.364921	4.24532	0.132256	0.444444	Peripherals	d__Bacteria; p__Acidobacteriota; c__Acidobacteriae; o__Acidobacteriales; f__uncultured; g__uncultured
bASV1446	15	0.321212	2224.35	-0.956928	0.079509	Peripherals	d__Bacteria; p__Bacteroidota; c__Bacteroidia; o__Chitinophagales; f__Chitinophagaceae; g__Edaphobaculum
bASV1447	50	0.357917	677.39	-0.674864	0.129244	Peripherals	d__Bacteria; p__Proteobacteria; c__Gammaproteobacteria; o__Steroidobacterales; f__Steroidobacteraceae; g__Steroidobacter
bASV1448	41	0.359707	24.9086	-0.754689	0	Peripherals	d__Bacteria; p__Actinobacteriota; c__Thermoleophilia; o__Gaiellales; f__uncultured; g__uncultured; s__uncultured_soil
bASV1449	196	0.421339	2781.61	0.356997	0.0259695	Peripherals	d__Bacteria; p__Actinobacteriota; c__Actinobacteria; o__Propionibacteriales; f__Nocardioidaceae; g__Nocardioides; s__Marmoricola_sp.
bASV1450	108	0.38768	70.6595	-0.281817	0.148404	Peripherals	d__Bacteria; p__Bacteroidota; c__Bacteroidia; o__Chitinophagales; f__Saprospiraceae; g__uncultured
bASV1453	180	0.420723	2324.03	0.240849	0	Peripherals	d__Bacteria; p__Actinobacteriota; c__Thermoleophilia; o__Solirubrobacterales; f__67-14; g__67-14; s__metagenome
bASV1455	4	0.257347	275.357	-0.358332	0.0188662	Peripherals	d__Bacteria; p__Proteobacteria; c__Alphaproteobacteria; o__Rhizobiales; f__Rhizobiales_Incertae_Sedis; g__Bauldia; s__uncultured_bacterium
bASV1456	40	0.351545	120.668	-0.763559	0	Peripherals	d__Bacteria; p__Proteobacteria; c__Gammaproteobacteria; o__Burkholderiales; f__Comamonadaceae; g__Comamonas
bASV1458	133	0.404418	4550.52	-0.100336	0.0275808	Peripherals	d__Bacteria; p__Gemmatimonadota; c__Gemmatimonadetes; o__Gemmatimonadales; f__Gemmatimonadaceae; g__Gemmatimonas
bASV1459	120	0.382236	129.766	-0.194706	0.207153	Peripherals	d__Bacteria; p__Chloroflexi; c__TK10; o__TK10; f__TK10; g__TK10; s__uncultured_Chloroflexi
bASV1462	58	0.377649	44.5949	-0.64478	0	Peripherals	d__Bacteria; p__Actinobacteriota; c__Actinobacteria; o__Propionibacteriales; f__Nocardioidaceae; g__Nocardioides
bASV1463	328	0.43945	1666.73	1.79084	0.444444	Peripherals	d__Bacteria; p__Gemmatimonadota; c__Gemmatimonadetes; o__Gemmatimonadales; f__Gemmatimonadaceae; g__Gemmatimonas
bASV1465	57	0.378571	1.03414	-0.652039	0.155958	Peripherals	d__Bacteria; p__Acidobacteriota; c__Thermoanaerobaculia; o__Thermoanaerobaculales; f__Thermoanaerobaculaceae; g__Subgroup_10
bASV1466	306	0.434989	850.284	1.59572	0	Peripherals	d__Bacteria; p__Gemmatimonadota; c__Gemmatimonadetes; o__Gemmatimonadales; f__Gemmatimonadaceae; g__Gemmatimonas
bASV1467	8	0.330489	0.386104	-1.00774	0	Peripherals	d__Bacteria; p__Chloroflexi; c__Chloroflexia; o__Chloroflexales; f__Roseiflexaceae; g__uncultured; s__uncultured_Chloroflexi
bASV1468	366	0.461503	3939.13	1.59107	0.0522499	Peripherals	d__Bacteria; p__Proteobacteria; c__Gammaproteobacteria; o__Burkholderiales; f__Nitrosomonadaceae; g__oc32; s__uncultured_bacterium
bASV1469	4	0.267819	1.14004	-1.08286	0.138029	Peripherals	d__Bacteria; p__Bacteroidota; c__Bacteroidia; o__Chitinophagales; f__Chitinophagaceae; g__Terrimonas
bASV147	107	0.383692	1541.87	-0.169306	0.321175	Peripherals	d__Bacteria; p__Proteobacteria; c__Alphaproteobacteria; o__Rhizobiales; f__Xanthobacteraceae
bASV1470	279	0.449955	7402.64	0.959515	0	Peripherals	d__Bacteria; p__Actinobacteriota; c__Thermoleophilia; o__Gaiellales; f__uncultured; g__uncultured
bASV1471	42	0.348805	15.8043	-0.74582	0	Peripherals	d__Bacteria; p__Actinobacteriota; c__Actinobacteria; o__Propionibacteriales; f__Nocardioidaceae; g__Nocardioides
bASV1472	251	0.414148	364.57	1.1079	0.0413039	Peripherals	d__Bacteria; p__Acidobacteriota; c__Acidobacteriae; o__Subgroup_2; f__Subgroup_2; g__Subgroup_2; s__uncultured_Acidobacteria
bASV1473	35	0.354453	16.5447	-0.807906	0.107962	Peripherals	d__Bacteria; p__Actinobacteriota; c__Actinobacteria; o__Frankiales; f__Sporichthyaceae; g__uncultured; s__uncultured_bacterium
bASV1474	1	1	0	0	0	Peripherals	d__Bacteria; p__Proteobacteria; c__Alphaproteobacteria; o__Micropepsales; f__Micropepsaceae; g__uncultured; s__metagenome
bASV1476	331	0.466312	3083.38	1.337	0.0855424	Peripherals	d__Bacteria; p__Verrucomicrobiota; c__Verrucomicrobiae; o__Pedosphaerales; f__Pedosphaeraceae; g__Pedosphaeraceae
bASV1477	125	0.40761	169.743	-0.15841	0	Peripherals	d__Bacteria; p__Proteobacteria; c__Gammaproteobacteria; o__Steroidobacterales; f__Steroidobacteraceae; g__uncultured; s__uncultured_gamma
bASV1478	9	0.322188	0	-1.03851	0	Peripherals	d__Bacteria; p__Actinobacteriota; c__Thermoleophilia; o__Gaiellales; f__Gaiellaceae; g__Gaiella; s__uncultured_Conexibacter
bASV1479	133	0.407857	53.9627	-0.100336	0.117678	Peripherals	d__Bacteria; p__Proteobacteria; c__Alphaproteobacteria; o__Reyranellales; f__Reyranellaceae; g__uncultured; s__uncultured_bacterium
bASV1480	96	0.366382	5076.94	-0.26687	0.01282	Peripherals	d__Bacteria; p__Proteobacteria; c__Gammaproteobacteria; o__Burkholderiales; f__Comamonadaceae
bASV1481	231	0.398654	90.8091	0.930506	0	Peripherals	d__Bacteria; p__Proteobacteria; c__Alphaproteobacteria; o__uncultured; f__uncultured; g__uncultured; s__uncultured_bacterium
bASV1482	6	0.335052	3.10595	-1.02226	0	Peripherals	d__Bacteria; p__Proteobacteria; c__Alphaproteobacteria; o__Rhizobiales; f__Devosiaceae; g__Devosia
bASV1486	3	0.333333	0	-1.04404	0	Peripherals	d__Bacteria; p__Proteobacteria; c__Gammaproteobacteria; o__Steroidobacterales; f__Steroidobacteraceae; g__Steroidobacter
bASV1487	250	0.443906	2504.43	0.748997	0	Peripherals	d__Bacteria; p__Acidobacteriota; c__Acidobacteriae; o__Bryobacterales; f__Bryobacteraceae; g__Bryobacter
bASV149	209	0.402961	7232.47	0.735378	0.444444	Peripherals	d__Bacteria; p__Proteobacteria; c__Alphaproteobacteria; o__Rhizobiales; f__Xanthobacteraceae; g__Rhodoplanes
bASV1490	334	0.442443	2509.26	1.35877	0.0820408	Peripherals	d__Bacteria; p__Actinobacteriota; c__Thermoleophilia; o__Gaiellales; f__uncultured; g__uncultured
bASV1492	2	0.282667	0	-1.0513	0	Peripherals	d__Bacteria; p__Proteobacteria; c__Gammaproteobacteria; o__Burkholderiales; f__Nitrosomonadaceae; g__mle1-7
bASV1493	6	0.293116	8.9215	0.00762408	0	Peripherals	d__Bacteria; p__Actinobacteriota; c__MB-A2-108; o__MB-A2-108; f__MB-A2-108; g__MB-A2-108
bASV1494	227	0.407198	310.604	0.582034	0.35503	Peripherals	d__Bacteria; p__Actinobacteriota; c__Actinobacteria; o__Propionibacteriales; f__Nocardioidaceae; g__Nocardioides; s__Nocardioides_iriomotensis
bASV1495	10	0.318772	151.423	-1.02964	0	Peripherals	d__Bacteria; p__Firmicutes; c__Bacilli; o__Paenibacillales; f__Paenibacillaceae; g__Paenibacillus; s__Paenibacillus_alvei
bASV1498	32	0.38	0.172117	-0.83352	0.35248	Peripherals	d__Bacteria; p__Bdellovibrionota; c__Bdellovibrionia; o__Bacteriovoracales; f__Bacteriovoracaceae; g__Peredibacter
bASV15	280	0.454833	11427.4	1.36511	0.496609	Peripherals	d__Bacteria; p__Proteobacteria; c__Alphaproteobacteria; o__Rhizobiales; f__Xanthobacteraceae
bASV150	12	0.332618	3806.66	-1.0119	0	Peripherals	d__Bacteria; p__Proteobacteria; c__Alphaproteobacteria; o__Rhizobiales; f__Rhizobiaceae; g__Mesorhizobium; s__Mesorhizobium_plurifarium
bASV1501	243	0.427419	2485.92	0.698182	0	Peripherals	d__Bacteria; p__Proteobacteria; c__Gammaproteobacteria; o__Cellvibrionales; f__Halieaceae; g__OM60(NOR5)_clade; s__uncultured_bacterium
bASV1503	48	0.379427	26.3662	-0.717372	0	Peripherals	d__Bacteria; p__Acidobacteriota; c__Acidobacteriae; o__Acidobacteriae; f__Acidobacteriae; g__Paludibaculum
bASV1505	350	0.468263	1978.24	1.47492	0.0165278	Peripherals	d__Bacteria; p__Myxococcota; c__Polyangia; o__Haliangiales; f__Haliangiaceae; g__Haliangium; s__uncultured_proteobacterium
bASV1506	209	0.385086	184.818	0.735378	0	Peripherals	d__Bacteria; p__Proteobacteria; c__Gammaproteobacteria; o__Burkholderiales; f__A21b; g__A21b; s__uncultured_soil
bASV1508	14	0.33125	0.46384	-0.994165	0	Peripherals	d__Bacteria; p__Proteobacteria; c__Alphaproteobacteria; o__Reyranellales; f__Reyranellaceae; g__Reyranella
bASV1509	3	0.251216	0	-1.04404	0	Peripherals	d__Bacteria; p__Bacteroidota; c__Bacteroidia; o__Chitinophagales; f__Chitinophagaceae
bASV151	371	0.466528	7954.66	2.17223	0	Peripherals	d__Bacteria; p__Proteobacteria; c__Alphaproteobacteria; o__Rhizobiales; f__Xanthobacteraceae; g__uncultured; s__uncultured_forest
bASV1512	15	0.349471	0	-0.956928	0.0446694	Peripherals	d__Bacteria; p__Proteobacteria; c__Alphaproteobacteria; o__Puniceispirillales; f__Puniceispirillales; g__Puniceispirillales; s__uncultured_Alphaproteobacteria
bASV1515	18	0.347901	4.40007	-0.958687	0.491493	Peripherals	d__Bacteria; p__Actinobacteriota; c__Thermoleophilia; o__Gaiellales; f__uncultured; g__uncultured; s__bacterium_Ellin6517
bASV1516	13	0.321828	73.1257	-1.00303	0.0155029	Peripherals	d__Bacteria; p__Chloroflexi; c__Chloroflexia; o__Chloroflexales; f__Roseiflexaceae; g__uncultured; s__uncultured_Chloroflexaceae
bASV1517	167	0.391981	3964.1	0.146479	0.239705	Peripherals	d__Bacteria; p__Chloroflexi; c__Anaerolineae; o__SJA-15; f__SJA-15; g__SJA-15; s__uncultured_soil
bASV1518	54	0.386416	1173.08	-0.673817	0	Peripherals	d__Bacteria; p__MBNT15; c__MBNT15; o__MBNT15; f__MBNT15; g__MBNT15; s__uncultured_bacterium
bASV1519	305	0.437541	1010.65	1.58685	0.015999	Peripherals	d__Bacteria; p__Proteobacteria; c__Alphaproteobacteria; o__Rhizobiales; f__Beijerinckiaceae
bASV152	1	1	0	0	0.275156	Peripherals	d__Bacteria; p__Proteobacteria; c__Gammaproteobacteria; o__Enterobacterales; f__Enterobacteriaceae; g__Klebsiella
bASV1521	243	0.429974	712.245	1.03694	0	Peripherals	d__Bacteria; p__Proteobacteria; c__Alphaproteobacteria; o__Elsterales; f__uncultured; g__uncultured; s__uncultured_bacterium
bASV1522	75	0.391753	266.518	-0.521373	0.65625	Connectors	d__Bacteria; p__Actinobacteriota; c__Thermoleophilia; o__Solirubrobacterales; f__67-14; g__67-14
bASV1523	41	0.34581	9.41542	-0.754689	0	Peripherals	d__Bacteria; p__Proteobacteria; c__Gammaproteobacteria; o__Burkholderiales; f__Comamonadaceae
bASV1524	347	0.458665	3500.92	1.45314	0.375	Peripherals	d__Bacteria; p__Proteobacteria; c__Alphaproteobacteria
bASV1526	178	0.416116	384.31	0.226331	0	Peripherals	d__Bacteria; p__Proteobacteria; c__Gammaproteobacteria; o__R7C24; f__R7C24; g__R7C24; s__uncultured_bacterium
bASV1528	58	0.363735	571.088	-0.603909	0	Peripherals	d__Bacteria; p__Actinobacteriota; c__Thermoleophilia; o__Gaiellales; f__uncultured; g__uncultured
bASV1529	56	0.388129	355.874	-0.659298	0	Peripherals	d__Bacteria; p__Myxococcota; c__bacteriap25; o__bacteriap25; f__bacteriap25; g__bacteriap25; s__uncultured_Syntrophobacterales
bASV1530	16	0.324786	123.982	-0.976426	0.0499671	Peripherals	d__Bacteria; p__Chloroflexi; c__TK10; o__TK10; f__TK10; g__TK10
bASV1532	5	0.299035	0	-1.07399	0.2688	Peripherals	d__Bacteria; p__Proteobacteria; c__Gammaproteobacteria; o__Burkholderiales; f__Nitrosomonadaceae; g__Ellin6067
bASV1533	83	0.399128	172.056	-0.463299	0.187124	Peripherals	d__Bacteria; p__Proteobacteria; c__Gammaproteobacteria; o__Steroidobacterales; f__Steroidobacteraceae; g__uncultured
bASV1534	80	0.366182	6.768	-0.408781	0	Peripherals	d__Bacteria; p__Proteobacteria; c__Alphaproteobacteria; o__uncultured; f__uncultured; g__uncultured
bASV1535	62	0.377366	143.552	-0.568431	0	Peripherals	d__Bacteria; p__Proteobacteria; c__Gammaproteobacteria; o__Burkholderiales; f__Comamonadaceae; g__Rivibacter; s__uncultured_bacterium
bASV1536	87	0.392746	94.9313	-0.434261	0	Peripherals	d__Bacteria; p__Proteobacteria; c__Alphaproteobacteria; o__Rhizobiales; f__Hyphomicrobiaceae; g__Hyphomicrobium
bASV1538	59	0.358938	154.38	-0.595039	0.280526	Peripherals	d__Bacteria; p__Proteobacteria; c__Gammaproteobacteria; o__Burkholderiales; f__SC-I-84; g__SC-I-84
bASV1539	5	0.296264	0	-1.07399	0	Peripherals	d__Bacteria; p__Proteobacteria; c__Alphaproteobacteria; o__Rhizobiales; f__Xanthobacteraceae; g__uncultured; s__uncultured_Hyphomicrobiaceae
bASV154	9	0.32442	0.0747931	-1.03851	0.110727	Peripherals	d__Bacteria; p__Proteobacteria; c__Alphaproteobacteria; o__Rhizobiales; f__Xanthobacteraceae; g__Rhodoplanes
bASV1540	105	0.399762	38.5236	-0.303595	0.162438	Peripherals	d__Bacteria; p__Actinobacteriota; c__Thermoleophilia; o__Solirubrobacterales; f__67-14; g__67-14; s__uncultured_soil
bASV1541	115	0.378429	336.64	-0.09835	0	Peripherals	d__Bacteria; p__Proteobacteria; c__Gammaproteobacteria; o__JG36-TzT-191; f__JG36-TzT-191; g__JG36-TzT-191; s__uncultured_bacterium
bASV1542	29	0.373863	0.108666	-0.855298	0	Peripherals	d__Bacteria; p__Actinobacteriota; c__Actinobacteria; o__Pseudonocardiales; f__Pseudonocardiaceae; g__Actinophytocola
bASV1546	86	0.380287	1619.28	-0.355564	0.234895	Peripherals	d__Bacteria; p__Chloroflexi; c__Ktedonobacteria; o__C0119; f__C0119; g__C0119; s__uncultured_Chloroflexi
bASV1547	160	0.39716	1904.96	0.300775	0.234859	Peripherals	d__Bacteria; p__Actinobacteriota; c__Thermoleophilia; o__Gaiellales; f__uncultured; g__uncultured; s__uncultured_Solirubrobacter
bASV1549	1	0.273902	0	-1.10947	0.0426843	Peripherals	d__Bacteria; p__Proteobacteria; c__Alphaproteobacteria; o__Rhizobiales; f__Rhizobiales_Incertae_Sedis; g__uncultured; s__uncultured_bacterium
bASV155	5	0.252286	2013	-0.0132638	0.444444	Peripherals	d__Bacteria; p__Proteobacteria; c__Gammaproteobacteria; o__Enterobacterales
bASV1552	100	0.391905	20.7876	-0.339891	0.0418657	Peripherals	d__Bacteria; p__Proteobacteria; c__Gammaproteobacteria; o__Burkholderiales; f__Comamonadaceae; g__Ramlibacter
bASV1553	23	0.357917	4.60845	-0.914339	0	Peripherals	d__Bacteria; p__Myxococcota; c__Polyangia; o__Polyangiales; f__Sandaracinaceae; g__uncultured; s__uncultured_bacterium
bASV1554	133	0.398417	5377.22	0.0613001	0.138698	Peripherals	d__Bacteria; p__Actinobacteriota; c__Acidimicrobiia; o__Microtrichales; f__uncultured; g__uncultured
bASV1557	299	0.39467	621.666	1.53363	0.0440548	Peripherals	d__Bacteria; p__Proteobacteria; c__Alphaproteobacteria; o__Rhizobiales; f__Xanthobacteraceae; g__uncultured
bASV1558	218	0.426966	493.073	0.516701	0.077794	Peripherals	d__Bacteria; p__Verrucomicrobiota; c__Verrucomicrobiae; o__Chthoniobacterales; f__Chthoniobacteraceae; g__Chthoniobacter
bASV156	116	0.404093	561.613	-0.223743	0.5	Peripherals	d__Bacteria; p__Proteobacteria; c__Alphaproteobacteria; o__Rhizobiales; f__Xanthobacteraceae; g__Rhodoplanes; s__uncultured_Alphaproteobacteria
bASV1561	279	0.4407	779.409	0.959515	0	Peripherals	d__Bacteria; p__Chloroflexi; c__TK10; o__TK10; f__TK10; g__TK10; s__uncultured_Firmicutes
bASV1562	138	0.389329	28.5233	-0.0640396	0.213468	Peripherals	d__Bacteria; p__Proteobacteria; c__Alphaproteobacteria; o__Sphingomonadales; f__Sphingomonadaceae
bASV1563	478	0.464376	9645.53	2.40411	0	Peripherals	d__Bacteria; p__Actinobacteriota; c__Acidimicrobiia; o__Microtrichales; f__Ilumatobacteraceae; g__uncultured; s__uncultured_soil
bASV1566	25	0.346883	78.7158	-0.896601	0	Peripherals	d__Bacteria; p__Proteobacteria; c__Alphaproteobacteria; o__Rhizobiales; f__KF-JG30-B3; g__KF-JG30-B3
bASV1568	3	0.270954	0	-0.391931	0	Peripherals	d__Bacteria; p__Firmicutes; c__Clostridia; o__Peptostreptococcales-Tissierellales; f__Peptostreptococcaceae; g__Sporacetigenium; s__uncultured_bacterium
bASV157	286	0.453297	1459.37	1.01033	0	Peripherals	d__Bacteria; p__Proteobacteria; c__Alphaproteobacteria; o__Dongiales; f__Dongiaceae; g__Dongia
bASV1570	16	0.32796	0.338629	-0.976426	0.215133	Peripherals	d__Bacteria; p__Actinobacteriota; c__Thermoleophilia; o__Solirubrobacterales; f__Solirubrobacteraceae; g__Solirubrobacter; s__Solirubrobacter_sp.
bASV1573	297	0.444592	874.726	1.09018	0	Peripherals	d__Bacteria; p__Chloroflexi; c__TK10; o__TK10; f__TK10; g__TK10; s__uncultured_bacterium
bASV1575	268	0.42751	2550.82	0.879663	0.429312	Peripherals	d__Bacteria; p__Actinobacteriota; c__Actinobacteria; o__Micrococcales; f__Demequinaceae; g__Demequina; s__uncultured_bacterium
bASV1576	1	0.198914	0	-0.943539	0.247576	Peripherals	d__Bacteria; p__Firmicutes; c__Clostridia; o__Lachnospirales; f__Lachnospiraceae
bASV1578	156	0.386342	5226.98	0.265298	0.264284	Peripherals	d__Bacteria; p__Proteobacteria; c__Gammaproteobacteria; o__Burkholderiales; f__SC-I-84; g__SC-I-84
bASV1579	59	0.372205	4.81786	-0.637521	0	Peripherals	d__Bacteria; p__Proteobacteria; c__Alphaproteobacteria; o__Rhizobiales; f__Rhizobiaceae
bASV158	261	0.437351	2557.52	1.19659	0	Peripherals	d__Bacteria; p__Proteobacteria; c__Gammaproteobacteria; o__Gammaproteobacteria_Incertae_Sedis; f__Unknown_Family; g__Acidibacter
bASV1580	142	0.382308	1137.93	0.141125	0	Peripherals	d__Bacteria; p__Proteobacteria; c__Gammaproteobacteria; o__Steroidobacterales; f__Woeseiaceae; g__JTB255_marine_benthic_group; s__uncultured_bacterium
bASV1581	74	0.381512	1381.03	-0.528632	0.0425331	Peripherals	d__Bacteria; p__Actinobacteriota; c__MB-A2-108; o__MB-A2-108; f__MB-A2-108; g__MB-A2-108
bASV1582	4	0.266755	1.06009	-1.08286	0	Peripherals	d__Bacteria; p__Bacteroidota; c__Bacteroidia; o__Chitinophagales; f__Chitinophagaceae; g__uncultured
bASV1585	161	0.392058	131.713	0.102923	0.266366	Peripherals	d__Bacteria; p__Proteobacteria; c__Alphaproteobacteria; o__Rhizobiales; f__Xanthobacteraceae
bASV1586	4	0.7	2.5	0.330719	0.333656	Peripherals	d__Bacteria; p__Proteobacteria; c__Gammaproteobacteria; o__Burkholderiales; f__Comamonadaceae
bASV1588	34	0.373655	15.8751	-0.819002	0	Peripherals	d__Bacteria; p__Bacteroidota; c__Bacteroidia; o__Flavobacteriales; f__Flavobacteriaceae; g__Flavobacterium; s__Flavobacterium_cauense
bASV1590	16	0.309133	0.137449	-0.976426	0	Peripherals	d__Bacteria; p__Actinobacteriota; c__Actinobacteria; o__Propionibacteriales; f__Nocardioidaceae; g__Nocardioides
bASV1591	247	0.406704	3761.26	0.727219	0	Peripherals	d__Bacteria; p__Actinobacteriota; c__Thermoleophilia; o__Solirubrobacterales; f__Solirubrobacteraceae; g__Solirubrobacter; s__uncultured_bacterium
bASV1592	13	0.307951	1118.05	1.28847	0.166378	Peripherals	d__Bacteria; p__Proteobacteria; c__Alphaproteobacteria; o__Rhizobiales; f__Hyphomicrobiaceae; g__Hyphomicrobium
bASV1593	259	0.415515	1243.84	0.81433	0.0593503	Peripherals	d__Bacteria; p__Actinobacteriota; c__Thermoleophilia; o__Solirubrobacterales; f__67-14; g__67-14
bASV1594	138	0.373032	2128.09	0.105647	0	Peripherals	d__Bacteria; p__Entotheonellaeota; c__Entotheonellia; o__Entotheonellales; f__Entotheonellaceae; g__Entotheonellaceae; s__uncultured_bacterium
bASV1595	340	0.457208	1943.5	1.89728	0.15904	Peripherals	d__Bacteria; p__RCP2-54; c__RCP2-54; o__RCP2-54; f__RCP2-54; g__RCP2-54
bASV1596	5	0.299658	0.168919	-1.02952	0.0164824	Peripherals	d__Bacteria; p__Proteobacteria; c__Alphaproteobacteria; o__Rhizobiales; f__Methyloligellaceae; g__uncultured
bASV1599	359	0.465234	4972.63	1.54026	0	Peripherals	d__Bacteria; p__Actinobacteriota; c__Actinobacteria; o__Propionibacteriales; f__Nocardioidaceae; g__Nocardioides
bASV16	70	0.377649	3086.38	-0.497475	0.125906	Peripherals	d__Bacteria; p__Firmicutes; c__Bacilli; o__Bacillales; f__Bacillaceae; g__Bacillus
bASV160	90	0.398339	1988.29	-0.412484	0	Peripherals	d__Bacteria; p__Actinobacteriota; c__Actinobacteria; o__Streptomycetales; f__Streptomycetaceae; g__Streptomyces
bASV1601	116	0.410853	44.7694	-0.223743	0.0272675	Peripherals	d__Bacteria; p__Chloroflexi; c__JG30-KF-CM66; o__JG30-KF-CM66; f__JG30-KF-CM66; g__JG30-KF-CM66; s__uncultured_bacterium
bASV1602	6	0.321982	2.94403	-1.06512	0	Peripherals	d__Bacteria; p__Actinobacteriota; c__Actinobacteria; o__Catenulisporales; f__Actinospicaceae; g__Actinospica
bASV1603	38	0.368729	0.942398	-0.789965	0	Peripherals	d__Bacteria; p__Proteobacteria; c__Alphaproteobacteria; o__Rhizobiales; f__uncultured; g__uncultured
bASV1604	164	0.393821	59.8988	0.124701	0	Peripherals	d__Bacteria; p__Proteobacteria; c__Alphaproteobacteria; o__Sphingomonadales; f__Sphingomonadaceae; g__Sphingomonas
bASV1605	148	0.406951	141.924	0.194342	0	Peripherals	d__Bacteria; p__Acidobacteriota; c__Holophagae; o__Subgroup_7; f__Subgroup_7; g__Subgroup_7; s__uncultured_delta
bASV1606	190	0.379356	82.7126	0.566859	0	Peripherals	d__Bacteria; p__Acidobacteriota; c__Acidobacteriae; o__Solibacterales; f__Solibacteraceae; g__Candidatus_Solibacter; s__uncultured_Holophaga
bASV1607	142	0.379785	3429.76	0.141125	0.401176	Peripherals	d__Bacteria; p__Proteobacteria; c__Alphaproteobacteria; o__Rhizobiales; f__Xanthobacteraceae; g__uncultured
bASV161	286	0.454115	1350.44	1.01033	0.642722	Connectors	d__Bacteria; p__Proteobacteria; c__Gammaproteobacteria; o__CCD24; f__CCD24; g__CCD24
bASV1617	316	0.456172	2604.27	1.68441	0	Peripherals	d__Bacteria; p__Actinobacteriota; c__Acidimicrobiia; o__IMCC26256; f__IMCC26256; g__IMCC26256; s__bacterium_enrichment
bASV1619	14	0.350993	19.0922	-0.964187	0.0119756	Peripherals	d__Bacteria; p__Actinobacteriota; c__Thermoleophilia; o__Gaiellales; f__uncultured; g__uncultured; s__uncultured_organism
bASV162	2	0.201945	0	-0.749405	0	Peripherals	d__Bacteria; p__Proteobacteria; c__Gammaproteobacteria; o__Pseudomonadales; f__Pseudomonadaceae; g__Pseudomonas; s__Pseudomonas_nitroreducens
bASV1620	17	0.326471	58.5025	-0.967556	0.099723	Peripherals	d__Bacteria; p__Proteobacteria; c__Gammaproteobacteria; o__Burkholderiales; f__SC-I-84; g__SC-I-84
bASV1621	341	0.452178	1540.29	1.40959	0.104938	Peripherals	d__Bacteria; p__Chloroflexi; c__TK10; o__TK10; f__TK10; g__TK10
bASV1622	1	0.254454	0	-1.05856	0	Peripherals	d__Bacteria; p__Desulfobacterota; c__Desulfuromonadia; o__Geobacterales; f__Geobacteraceae; g__Geobacter; s__uncultured_Desulfuromonadales
bASV1623	274	0.397395	200.437	1.31189	0	Peripherals	d__Bacteria; p__Proteobacteria; c__Alphaproteobacteria; o__Rhizobiales; f__Xanthobacteraceae; g__uncultured
bASV1624	93	0.357726	4.65044	-0.293478	0	Peripherals	d__Bacteria; p__Verrucomicrobiota; c__Verrucomicrobiae; o__Pedosphaerales; f__Pedosphaeraceae; g__ADurb.Bin063-1; s__uncultured_bacterium
bASV1626	106	0.364591	698.832	-0.296336	0.165792	Peripherals	d__Bacteria; p__Proteobacteria; c__Gammaproteobacteria; o__Burkholderiales; f__Nitrosomonadaceae; g__MND1
bASV1627	41	0.360738	7.96089	-0.754689	0.0402129	Peripherals	d__Bacteria; p__Actinobacteriota; c__Thermoleophilia; o__Gaiellales; f__uncultured; g__uncultured
bASV1628	138	0.378999	89.7204	0.105647	0.18	Peripherals	d__Bacteria; p__Proteobacteria; c__Gammaproteobacteria; o__Gammaproteobacteria_Incertae_Sedis; f__Unknown_Family; g__Acidibacter
bASV1629	144	0.385824	1240.4	0.158864	0.0459516	Peripherals	d__Bacteria; p__Acidobacteriota; c__Subgroup_5; o__Subgroup_5; f__Subgroup_5; g__Subgroup_5; s__uncultured_bacterium
bASV163	243	0.452279	1190.72	0.698182	0	Peripherals	d__Bacteria; p__Proteobacteria; c__Alphaproteobacteria; o__Rhizobiales; f__Rhizobiaceae; g__Ensifer
bASV1630	240	0.390537	523.577	1.01033	0	Peripherals	d__Bacteria; p__Acidobacteriota; c__Acidobacteriae; o__Acidobacteriales; f__uncultured; g__uncultured
bASV1632	3	0.283942	6.13621	-1.09173	0	Peripherals	d__Bacteria; p__Actinobacteriota; c__Thermoleophilia; o__Solirubrobacterales; f__67-14; g__67-14; s__uncultured_soil
bASV1634	48	0.357092	4.91948	-0.692603	0.403892	Peripherals	d__Bacteria; p__Proteobacteria; c__Gammaproteobacteria; o__Burkholderiales; f__SC-I-84; g__SC-I-84; s__metagenome
bASV1635	134	0.400956	286.385	-0.0930766	0	Peripherals	d__Bacteria; p__Actinobacteriota; c__Acidimicrobiia; o__IMCC26256; f__IMCC26256; g__IMCC26256; s__uncultured_actinobacterium
bASV1636	4	0.26183	1648.24	-0.358332	0	Peripherals	d__Bacteria; p__Chloroflexi; c__Chloroflexia; o__Chloroflexales; f__Roseiflexaceae; g__uncultured; s__uncultured_bacterium
bASV1639	265	0.435177	1638.52	1.23207	0.169244	Peripherals	d__Bacteria; p__Acidobacteriota; c__Acidobacteriae; o__Solibacterales; f__Solibacteraceae; g__Candidatus_Solibacter
bASV164	375	0.480554	12637.6	1.6564	0.148283	Peripherals	d__Bacteria; p__Proteobacteria; c__Alphaproteobacteria; o__Dongiales; f__Dongiaceae; g__Dongia
bASV1640	10	0.312006	0.823051	-1.02964	0	Peripherals	d__Bacteria; p__Proteobacteria; c__Alphaproteobacteria; o__Rhizobiales; f__Labraceae; g__Labrys
bASV1643	150	0.380862	341.565	0.212081	0	Peripherals	d__Bacteria; p__Proteobacteria; c__Alphaproteobacteria; o__Rhizobiales; f__Xanthobacteraceae; g__uncultured
bASV1645	236	0.426424	1225.38	0.974854	0	Peripherals	d__Bacteria; p__Actinobacteriota; c__Actinobacteria; o__Frankiales; f__Acidothermaceae; g__Acidothermus; s__uncultured_bacterium
bASV1646	230	0.390234	80.6202	0.921637	0.238714	Peripherals	d__Bacteria; p__Verrucomicrobiota; c__Verrucomicrobiae; o__Pedosphaerales; f__Pedosphaeraceae; g__Pedosphaera; s__uncultured_bacterium
bASV1648	8	0.322395	4.74829	-1.04738	0	Peripherals	d__Bacteria; p__Actinobacteriota; c__Actinobacteria; o__Frankiales; f__Frankiaceae; g__Jatrophihabitans
bASV1649	150	0.425343	319.159	0.0230715	0	Peripherals	d__Bacteria; p__Chloroflexi; c__Chloroflexia; o__Chloroflexales; f__Roseiflexaceae; g__uncultured; s__uncultured_bacterium
bASV165	46	0.385233	5.02454	-0.731891	0	Peripherals	d__Bacteria; p__Actinobacteriota; c__Actinobacteria; o__Micrococcales; f__Microbacteriaceae; g__Microbacterium
bASV1650	5	0.293886	0	-1.07399	0	Peripherals	d__Bacteria; p__Proteobacteria; c__Alphaproteobacteria; o__Caulobacterales; f__Hyphomonadaceae; g__SWB02; s__uncultured_bacterium
bASV1651	11	0.36725	0.0112858	-0.985965	0	Peripherals	d__Bacteria; p__Proteobacteria; c__Gammaproteobacteria; o__Burkholderiales; f__TRA3-20; g__TRA3-20
bASV1652	120	0.377083	1065.93	-0.0540027	0	Peripherals	d__Bacteria; p__Actinobacteriota; c__Thermoleophilia; o__Solirubrobacterales; f__67-14; g__67-14; s__uncultured_bacterium
bASV1653	74	0.39084	3472.51	-0.528632	0.0230516	Peripherals	d__Bacteria; p__Proteobacteria; c__Alphaproteobacteria; o__Rhizobiales; f__Hyphomicrobiaceae; g__Pedomicrobium
bASV1654	9	0.303313	20.4165	-1.03851	0.0263979	Peripherals	d__Bacteria; p__Actinobacteriota; c__Acidimicrobiia; o__Microtrichales
bASV1659	207	0.434145	1115.7	0.436849	0.33378	Peripherals	d__Bacteria; p__Actinobacteriota; c__Rubrobacteria; o__Rubrobacterales; f__Rubrobacteriaceae; g__Rubrobacter
bASV166	26	0.353395	19.6914	-0.887731	0.142012	Peripherals	d__Bacteria; p__Myxococcota; c__Polyangia; o__Polyangiales; f__Polyangiaceae
bASV1661	66	0.386639	355.525	-0.586706	0	Peripherals	d__Bacteria; p__Actinobacteriota; c__Thermoleophilia; o__uncultured; f__uncultured; g__uncultured; s__uncultured_bacterium
bASV1662	101	0.371244	318.263	-0.222522	0.5	Peripherals	d__Bacteria; p__Acidobacteriota; c__Acidobacteriae; o__Solibacterales; f__Solibacteraceae; g__Candidatus_Solibacter
bASV1663	237	0.429974	1459.72	0.983723	0.354261	Peripherals	d__Bacteria; p__Proteobacteria; c__Alphaproteobacteria; o__Micropepsales; f__Micropepsaceae; g__uncultured; s__uncultured_bacterium
bASV1664	25	0.348383	888.114	-0.896601	0.168349	Peripherals	d__Bacteria; p__Proteobacteria; c__Alphaproteobacteria; o__Rhizobiales
bASV1665	21	0.360544	1.27618	-0.913372	0.00913223	Peripherals	d__Bacteria; p__Actinobacteriota; c__Actinobacteria; o__Micrococcales; f__Promicromonosporaceae; g__Isoptericola
bASV1666	231	0.399128	97.7318	0.930506	0.165832	Peripherals	d__Bacteria; p__Actinobacteriota; c__Actinobacteria; o__Frankiales; f__Acidothermaceae; g__Acidothermus
bASV1667	97	0.399207	3163.57	-0.361669	0	Peripherals	d__Bacteria; p__Actinobacteriota; c__Acidimicrobiia; o__Actinomarinales; f__uncultured; g__uncultured
bASV1668	78	0.386194	33.9121	-0.499595	0	Peripherals	d__Bacteria; p__Actinobacteriota; c__Actinobacteria; o__Propionibacteriales; f__Nocardioidaceae; g__Aeromicrobium
bASV1669	50	0.383838	817.036	-0.702854	0	Peripherals	d__Bacteria; p__Chloroflexi; c__JG30-KF-CM66; o__JG30-KF-CM66; f__JG30-KF-CM66; g__JG30-KF-CM66; s__uncultured_bacterium
bASV167	131	0.386639	1811.09	0.0435612	0.2112	Peripherals	d__Bacteria; p__Actinobacteriota; c__Actinobacteria; o__Micrococcales; f__Micrococcaceae; g__Arthrobacter
bASV1671	2	0.24564	0	-0.5	0	Peripherals	d__Bacteria; p__Proteobacteria; c__Gammaproteobacteria; o__Enterobacterales
bASV1672	7	0.286405	25.3795	0.190602	0	Peripherals	d__Bacteria; p__Actinobacteriota; c__Thermoleophilia; o__Gaiellales; f__uncultured; g__uncultured; s__uncultured_prokaryote
bASV1674	8	0.290495	381.971	-1.04738	0.0107524	Peripherals	d__Bacteria; p__Actinobacteriota; c__Thermoleophilia; o__Solirubrobacterales; f__Solirubrobacteraceae; g__Conexibacter; s__uncultured_bacterium
bASV1675	79	0.392593	302.702	-0.492336	0.569444	Peripherals	d__Bacteria; p__Actinobacteriota; c__Thermoleophilia; o__Gaiellales; f__Gaiellaceae; g__Gaiella
bASV1676	183	0.396379	387.264	0.262627	0.411243	Peripherals	d__Bacteria; p__Verrucomicrobiota; c__Verrucomicrobiae; o__Pedosphaerales; f__Pedosphaeraceae; g__ADurb.Bin063-1
bASV1677	333	0.425164	968.632	1.35151	0	Peripherals	d__Bacteria; p__Actinobacteriota; c__Acidimicrobiia; o__Microtrichales; f__Ilumatobacteraceae; g__uncultured
bASV1678	23	0.327426	3.41731	-0.914339	0.0688776	Peripherals	d__Bacteria; p__Actinobacteriota; c__Thermoleophilia; o__Gaiellales; f__uncultured; g__uncultured
bASV1679	42	0.372825	0.335026	-0.760928	0	Peripherals	d__Bacteria; p__Acidobacteriota; c__Thermoanaerobaculia; o__Thermoanaerobaculales; f__Thermoanaerobaculaceae; g__Subgroup_10; s__uncultured_Holophaga
bASV168	164	0.419321	7358.3	0.336253	0	Peripherals	d__Bacteria; p__Proteobacteria; c__Alphaproteobacteria; o__Rhizobiales; f__Xanthobacteraceae; g__uncultured
bASV1683	9	0.331304	0.168623	-1.00048	0	Peripherals	d__Bacteria; p__Proteobacteria; c__Alphaproteobacteria; o__Sphingomonadales; f__Sphingomonadaceae; g__Sphingomonas
bASV1685	1	0.268605	0	-1.10947	0	Peripherals	d__Bacteria; p__Actinobacteriota; c__Acidimicrobiia; o__IMCC26256; f__IMCC26256; g__IMCC26256
bASV1687	63	0.363079	35.6691	-0.608484	0	Peripherals	d__Bacteria; p__Bacteroidota; c__Bacteroidia; o__Flavobacteriales; f__Flavobacteriaceae; g__Flavobacterium
bASV169	27	0.352715	59.3803	-0.878862	0	Peripherals	d__Bacteria; p__Firmicutes; c__Bacilli; o__Bacillales; f__Bacillaceae; g__Bacillus
bASV1690	68	0.365716	688.451	-0.515214	0	Peripherals	d__Bacteria; p__Proteobacteria; c__Alphaproteobacteria; o__Rhizobiales; f__Xanthobacteraceae; g__Afipia
bASV1692	210	0.393129	64.0698	0.744248	0	Peripherals	d__Bacteria; p__Acidobacteriota; c__Acidobacteriae; o__Acidobacteriales; f__uncultured; g__uncultured
bASV1696	58	0.361256	548.232	-0.603909	0	Peripherals	d__Bacteria; p__Acidobacteriota; c__Subgroup_5; o__Subgroup_5; f__Subgroup_5; g__Subgroup_5; s__uncultured_Acidobacteria
bASV17	93	0.391829	8484.27	-0.293478	0	Peripherals	d__Bacteria; p__Firmicutes; c__Bacilli; o__Bacillales; f__Bacillaceae; g__Bacillus; s__Bacillus_mycoides
bASV170	104	0.397474	2694.94	-0.195914	0	Peripherals	d__Bacteria; p__Actinobacteriota; c__MB-A2-108; o__MB-A2-108; f__MB-A2-108; g__MB-A2-108
bASV1701	83	0.372825	518.785	-0.382172	0	Peripherals	d__Bacteria; p__Actinobacteriota; c__Acidimicrobiia
bASV1703	331	0.457727	1656.58	1.337	0	Peripherals	d__Bacteria; p__Bacteroidota; c__Bacteroidia; o__Cytophagales; f__Microscillaceae
bASV1704	211	0.420372	174.929	0.465886	0.444444	Peripherals	d__Bacteria; p__Myxococcota; c__bacteriap25; o__bacteriap25; f__bacteriap25; g__bacteriap25; s__uncultured_Syntrophobacterales
bASV1705	36	0.372205	1411.12	-0.804483	0.0133773	Peripherals	d__Bacteria; p__Proteobacteria; c__Alphaproteobacteria; o__Rhizobiales; f__Xanthobacteraceae; g__Pseudorhodoplanes
bASV1706	199	0.39716	516.055	0.378775	0	Peripherals	d__Bacteria; p__Actinobacteriota; c__MB-A2-108; o__MB-A2-108; f__MB-A2-108; g__MB-A2-108
bASV1707	146	0.412114	3937.3	-0.00596553	0	Peripherals	d__Bacteria; p__Proteobacteria; c__Alphaproteobacteria; o__Rhizobiales; f__Xanthobacteraceae; g__uncultured
bASV1708	1	0.284866	0	-1.10947	0.151502	Peripherals	d__Bacteria; p__Chloroflexi; c__Chloroflexia; o__Chloroflexales; f__Roseiflexaceae; g__Kouleothrix
bASV1709	261	0.415172	216.968	0.828849	0.0198	Peripherals	d__Bacteria; p__Actinobacteriota; c__Actinobacteria; o__Frankiales; f__Frankiales; g__Frankiales; s__uncultured_bacterium
bASV171	253	0.454833	1202.76	0.770775	0.0419975	Peripherals	d__Bacteria; p__Gemmatimonadota; c__Gemmatimonadetes; o__Gemmatimonadales; f__Gemmatimonadaceae; g__uncultured
bASV1712	3	0.299257	0	-1.04404	0	Peripherals	d__Bacteria; p__Bacteroidota; c__SJA-28; o__SJA-28; f__SJA-28; g__SJA-28; s__uncultured_bacterium
bASV1713	302	0.438493	857.891	1.56024	0	Peripherals	d__Bacteria; p__Proteobacteria; c__Alphaproteobacteria; o__Rhizobiales; f__Xanthobacteraceae; g__uncultured
bASV1714	88	0.3916	1228.3	-0.427002	0.3848	Peripherals	d__Bacteria; p__Proteobacteria; c__Alphaproteobacteria; o__Rhizobiales; f__Rhizobiaceae; g__Mesorhizobium
bASV1715	268	0.437446	515.625	1.25868	0	Peripherals	d__Bacteria; p__Proteobacteria; c__Alphaproteobacteria; o__Elsterales; f__uncultured; g__uncultured; s__uncultured_bacterium
bASV1716	12	0.328977	209.854	-1.0119	0.408163	Peripherals	d__Bacteria; p__Actinobacteriota; c__MB-A2-108; o__MB-A2-108; f__MB-A2-108; g__MB-A2-108; s__uncultured_bacterium
bASV1718	41	0.383254	2028.19	-0.768187	0	Peripherals	d__Bacteria; p__Actinobacteriota; c__Thermoleophilia; o__Solirubrobacterales; f__67-14; g__67-14; s__uncultured_Rubrobacteria
bASV172	136	0.428055	265.184	-0.0785581	0	Peripherals	d__Bacteria; p__Proteobacteria; c__Alphaproteobacteria; o__Rhizobiales; f__Rhizobiaceae; g__Allorhizobium-Neorhizobium-Pararhizobium-Rhizobium; s__Pararhizobium_giardinii
bASV1722	285	0.431726	796.898	1.40946	0	Peripherals	d__Bacteria; p__Proteobacteria; c__Gammaproteobacteria
bASV1723	101	0.355579	33.6375	-0.222522	0	Peripherals	d__Bacteria; p__Proteobacteria; c__Gammaproteobacteria; o__Xanthomonadales; f__Rhodanobacteraceae; g__Rhodanobacter
bASV1724	6	0.277449	556.792	-1.06512	0	Peripherals	d__Bacteria; p__Bacteroidota; c__Bacteroidia; o__Chitinophagales; f__Chitinophagaceae; g__Ferruginibacter
bASV1726	275	0.431633	1581.82	1.32076	0.110088	Peripherals	d__Bacteria; p__Proteobacteria; c__Alphaproteobacteria; o__Rhizobiales; f__KF-JG30-B3; g__KF-JG30-B3; s__uncultured_bacterium
bASV1727	168	0.385233	81.9758	0.153738	0	Peripherals	d__Bacteria; p__Actinobacteriota; c__Thermoleophilia; o__Solirubrobacterales; f__67-14; g__67-14; s__uncultured_actinobacterium
bASV173	41	0.378145	2186.84	-0.768187	0.355713	Peripherals	d__Bacteria; p__Proteobacteria; c__Alphaproteobacteria; o__Sphingomonadales; f__Sphingomonadaceae; g__Sphingomonas
bASV1733	104	0.362622	299.39	-0.195914	0.485425	Peripherals	d__Bacteria; p__Gemmatimonadota; c__Gemmatimonadetes; o__Gemmatimonadales; f__Gemmatimonadaceae; g__uncultured
bASV1734	207	0.416116	176.872	0.436849	0	Peripherals	d__Bacteria; p__Myxococcota; c__Polyangia; o__Polyangiales; f__Phaselicystidaceae; g__Phaselicystis
bASV1736	58	0.360029	534.73	-0.603909	0	Peripherals	d__Bacteria; p__Proteobacteria; c__Alphaproteobacteria; o__Rhizobiales; f__Rhizobiaceae; g__Allorhizobium-Neorhizobium-Pararhizobium-Rhizobium; s__Rhizobium_miluonense
bASV1738	27	0.377295	2.67614	-0.869817	0	Peripherals	d__Bacteria; p__Myxococcota; c__bacteriap25; o__bacteriap25; f__bacteriap25; g__bacteriap25; s__uncultured_Syntrophobacterales
bASV1739	109	0.40761	64.0954	-0.274558	0	Peripherals	d__Bacteria; p__Acidobacteriota; c__Thermoanaerobaculia; o__Thermoanaerobaculales; f__Thermoanaerobaculaceae; g__Subgroup_10; s__uncultured_prokaryote
bASV174	394	0.469573	6606.41	2.37623	0	Peripherals	d__Bacteria; p__Acidobacteriota; c__Acidobacteriae; o__Subgroup_2; f__Subgroup_2; g__Subgroup_2; s__uncultured_Acidobacteria
bASV1742	196	0.418711	1144.35	0.620076	0	Peripherals	d__Bacteria; p__Actinobacteriota; c__Actinobacteria; o__Frankiales; f__Frankiaceae; g__Jatrophihabitans; s__Jatrophihabitans_sp.
bASV1744	197	0.396847	3802.57	0.628945	0	Peripherals	d__Bacteria; p__Actinobacteriota; c__MB-A2-108; o__MB-A2-108; f__MB-A2-108; g__MB-A2-108; s__uncultured_bacterium
bASV1746	40	0.346584	137.472	-0.763559	0.0433001	Peripherals	d__Bacteria; p__Proteobacteria; c__Gammaproteobacteria; o__Burkholderiales; f__SC-I-84; g__SC-I-84
bASV1747	116	0.369881	2658.13	-0.0894805	0.129132	Peripherals	d__Bacteria; p__Proteobacteria; c__Gammaproteobacteria; o__Burkholderiales; f__A21b; g__A21b
bASV1748	170	0.386194	2190.76	0.38947	0	Peripherals	d__Bacteria; p__Acidobacteriota; c__Acidobacteriae; o__Solibacterales; f__Solibacteraceae; g__Candidatus_Solibacter; s__uncultured_Acidobacteria
bASV1749	6	0.337636	0	-1.02226	0	Peripherals	d__Bacteria; p__Planctomycetota; c__Pla4_lineage; o__Pla4_lineage; f__Pla4_lineage; g__Pla4_lineage; s__uncultured_Planctomycetaceae
bASV1756	121	0.41035	1683.13	-0.187447	0	Peripherals	d__Bacteria; p__Actinobacteriota; c__Thermoleophilia; o__Solirubrobacterales; f__67-14; g__67-14; s__uncultured_bacterium
bASV1757	341	0.460975	2191.45	1.40959	0.48	Peripherals	d__Bacteria; p__Proteobacteria; c__Alphaproteobacteria; o__Rhizobiales; f__Beijerinckiaceae; g__Microvirga
bASV1758	65	0.392058	16.631	-0.593965	0.0419975	Peripherals	d__Bacteria; p__Actinobacteriota; c__Acidimicrobiia; o__IMCC26256; f__IMCC26256; g__IMCC26256; s__metagenome
bASV1759	74	0.394052	466.012	-0.528632	0	Peripherals	d__Bacteria; p__Myxococcota; c__Polyangia; o__Polyangiales; f__Polyangiaceae; g__uncultured
bASV176	62	0.389179	553.855	-0.568431	0.113224	Peripherals	d__Bacteria; p__Acidobacteriota; c__Acidobacteriae; o__Solibacterales; f__Solibacteraceae; g__Candidatus_Solibacter
bASV1766	66	0.37193	37.2716	-0.532953	0	Peripherals	d__Bacteria; p__Acidobacteriota; c__Acidobacteriae; o__Bryobacterales; f__Bryobacteraceae; g__Bryobacter
bASV1768	23	0.373101	3.70686	-0.898854	0	Peripherals	d__Bacteria; p__Proteobacteria; c__Gammaproteobacteria; o__Burkholderiales; f__TRA3-20; g__TRA3-20
bASV1769	106	0.389781	129.665	-0.296336	0	Peripherals	d__Bacteria; p__Acidobacteriota; c__Subgroup_5; o__Subgroup_5; f__Subgroup_5; g__Subgroup_5; s__uncultured_Acidobacteria
bASV177	185	0.429608	4015.47	0.522512	0.176635	Peripherals	d__Bacteria; p__Actinobacteriota; c__Thermoleophilia; o__Gaiellales; f__Gaiellaceae; g__Gaiella; s__uncultured_Conexibacter
bASV1770	2	0.306825	2013	0.707107	0	Peripherals	d__Bacteria; p__Proteobacteria; c__Gammaproteobacteria; o__Gammaproteobacteria_Incertae_Sedis; f__Unknown_Family; g__Acidibacter
bASV1771	180	0.41483	339.748	0.240849	0.0116955	Peripherals	d__Bacteria; p__Actinobacteriota; c__Actinobacteria; o__Propionibacteriales; f__Nocardioidaceae; g__Nocardioides
bASV1772	8	0.292393	0.599085	-1.04738	0	Peripherals	d__Bacteria; p__Proteobacteria; c__Alphaproteobacteria; o__uncultured; f__uncultured; g__uncultured
bASV1774	177	0.409183	397.988	0.451556	0.353229	Peripherals	d__Bacteria; p__Actinobacteriota; c__Actinobacteria; o__Micrococcales; f__Microbacteriaceae; g__Microbacterium
bASV1776	25	0.330164	231.805	-0.896601	0	Peripherals	d__Bacteria; p__Actinobacteriota; c__Thermoleophilia; o__Solirubrobacterales; f__Solirubrobacteraceae; g__Conexibacter
bASV1778	1	0.28916	0	-1.05856	0	Peripherals	d__Bacteria; p__Chloroflexi; c__TK10; o__TK10; f__TK10; g__TK10; s__uncultured_bacterium
bASV1779	249	0.397395	2482.01	1.09016	0	Peripherals	d__Bacteria; p__Actinobacteriota; c__Acidimicrobiia; o__IMCC26256; f__IMCC26256; g__IMCC26256; s__uncultured_Ferrimicrobium
bASV178	259	0.436214	957.779	0.81433	0	Peripherals	d__Bacteria; p__Proteobacteria; c__Alphaproteobacteria; o__Sphingomonadales; f__Sphingomonadaceae; g__Sphingomonas
bASV1780	88	0.366448	4034.81	-0.337825	0.00680264	Peripherals	d__Bacteria; p__Actinobacteriota; c__Acidimicrobiia; o__Microtrichales
bASV1781	18	0.365318	0.247777	-0.93515	0	Peripherals	d__Bacteria; p__Actinobacteriota; c__Actinobacteria; o__Micromonosporales; f__Micromonosporaceae; g__Catelliglobosispora; s__Catelliglobosispora_koreensis
bASV1783	95	0.38612	78.167	-0.376187	0	Peripherals	d__Bacteria; p__Proteobacteria; c__Gammaproteobacteria; o__Xanthomonadales; f__Rhodanobacteraceae; g__Tahibacter; s__uncultured_bacterium
bASV1784	178	0.386936	36.2313	0.460425	0.332799	Peripherals	d__Bacteria; p__Chloroflexi; c__AD3; o__AD3; f__AD3; g__AD3; s__uncultured_organism
bASV1785	237	0.429516	2897.37	0.983723	0	Peripherals	d__Bacteria; p__Acidobacteriota; c__Acidobacteriae; o__Solibacterales; f__Solibacteraceae; g__Candidatus_Solibacter
bASV1788	115	0.382817	778.57	-0.09835	0	Peripherals	d__Bacteria; p__Chloroflexi
bASV179	55	0.383181	307.901	-0.630517	0.0382629	Peripherals	d__Bacteria; p__Actinobacteriota; c__Actinobacteria; o__Corynebacteriales; f__Mycobacteriaceae; g__Mycobacterium
bASV1790	201	0.423732	573.525	0.393293	0	Peripherals	d__Bacteria; p__Chloroflexi; c__TK10; o__TK10; f__TK10; g__TK10
bASV1792	86	0.399049	109.254	-0.441521	0	Peripherals	d__Bacteria; p__Proteobacteria; c__Gammaproteobacteria; o__Burkholderiales; f__Nitrosomonadaceae; g__oc32; s__uncultured_bacterium
bASV1794	2	0.304967	0	-1.1006	0	Peripherals	d__Bacteria; p__Actinobacteriota; c__Thermoleophilia; o__Gaiellales; f__uncultured; g__uncultured
bASV1795	173	0.398891	29.4122	0.190034	0	Peripherals	d__Bacteria; p__Proteobacteria; c__Alphaproteobacteria; o__Rhizobiales; f__Xanthobacteraceae
bASV18	6	0.202249	2167.68	0.232117	0	Peripherals	d__Bacteria; p__Proteobacteria; c__Gammaproteobacteria; o__Burkholderiales; f__Comamonadaceae; g__Comamonas; s__Comamonas_testosteroni
bASV180	13	0.331632	14.5171	-1.00303	0.161007	Peripherals	d__Bacteria; p__Actinobacteriota; c__Thermoleophilia; o__Solirubrobacterales; f__67-14; g__67-14; s__metagenome
bASV1800	4	0.32111	0	-1.08286	0	Peripherals	d__Bacteria; p__Proteobacteria; c__Gammaproteobacteria; o__Burkholderiales; f__Nitrosomonadaceae; g__MND1
bASV1802	89	0.386342	2246.88	-0.419743	0	Peripherals	d__Bacteria; p__Proteobacteria; c__Alphaproteobacteria; o__Rhizobiales; f__Xanthobacteraceae
bASV181	331	0.465988	5207.36	1.337	0	Peripherals	d__Bacteria; p__Proteobacteria; c__Alphaproteobacteria; o__Rhizobiales; f__Rhizobiaceae; g__Allorhizobium-Neorhizobium-Pararhizobium-Rhizobium
bASV1814	2	0.248274	2013	-0.667735	0	Peripherals	d__Bacteria; p__Firmicutes; c__Clostridia; o__Clostridiales; f__Clostridiaceae; g__Clostridium_sensu_stricto_3
bASV1817	81	0.388728	136.301	-0.477817	0.0675117	Peripherals	d__Bacteria; p__Actinobacteriota; c__Thermoleophilia; o__Gaiellales; f__Gaiellaceae; g__Gaiella
bASV1818	11	0.328334	217.074	-0.985965	0	Peripherals	d__Bacteria; p__Firmicutes; c__Clostridia; o__Peptostreptococcales-Tissierellales; f__Peptostreptococcaceae
bASV182	328	0.456172	14658.8	1.79084	0	Peripherals	d__Bacteria; p__Proteobacteria; c__Alphaproteobacteria; o__Rhizobiales; f__Xanthobacteraceae
bASV1821	134	0.382599	57.263	-0.0930766	0.00790501	Peripherals	d__Bacteria; p__Proteobacteria; c__Alphaproteobacteria; o__Rhizobiales; f__Hyphomicrobiaceae; g__Hyphomicrobium; s__uncultured_bacterium
bASV1822	42	0.341877	165.382	-0.74582	0.0222194	Peripherals	d__Bacteria; p__Actinobacteriota; c__Actinobacteria; o__Propionibacteriales; f__Nocardioidaceae; g__Nocardioides
bASV1826	50	0.353706	0.280288	-0.674864	0	Peripherals	d__Bacteria; p__Acidobacteriota; c__Acidobacteriae; o__Acidobacteriales; f__uncultured; g__uncultured
bASV1827	206	0.398733	3439.47	0.70877	0	Peripherals	d__Bacteria; p__Proteobacteria; c__Alphaproteobacteria; o__Rhizobiales; f__A0839; g__A0839; s__uncultured_proteobacterium
bASV1829	305	0.401195	2968.31	1.58685	0	Peripherals	d__Bacteria; p__Actinobacteriota; c__Thermoleophilia; o__Gaiellales; f__uncultured; g__uncultured
bASV183	47	0.374349	163.631	-0.701473	0.1609	Peripherals	d__Bacteria
bASV1830	268	0.421251	3396.03	0.879663	0	Peripherals	d__Bacteria; p__Actinobacteriota; c__Thermoleophilia; o__Solirubrobacterales; f__67-14; g__67-14
bASV1831	396	0.444985	4237.34	1.80885	0	Peripherals	d__Bacteria; p__Actinobacteriota; c__Actinobacteria; o__Propionibacteriales; f__Nocardioidaceae; g__Nocardioides
bASV1832	77	0.39359	489.091	-0.506854	0	Peripherals	d__Bacteria; p__Actinobacteriota; c__MB-A2-108; o__MB-A2-108; f__MB-A2-108; g__MB-A2-108; s__metagenome
bASV184	60	0.381512	488.112	-0.630261	0	Peripherals	d__Bacteria; p__Proteobacteria; c__Alphaproteobacteria; o__Rhizobiales; f__Devosiaceae; g__Devosia
bASV1842	3	0.311427	0	-1.09173	0.047971	Peripherals	d__Bacteria; p__Actinobacteriota; c__Actinobacteria; o__Pseudonocardiales; f__Pseudonocardiaceae; g__Pseudonocardia
bASV1843	231	0.397788	80.287	0.930506	0.360992	Peripherals	d__Bacteria; p__Acidobacteriota; c__Acidobacteriae; o__Acidobacteriales; f__uncultured; g__uncultured
bASV1844	143	0.382526	60.8727	-0.0277433	0	Peripherals	d__Bacteria; p__Actinobacteriota; c__Actinobacteria; o__Pseudonocardiales; f__Pseudonocardiaceae; g__Actinomycetospora; s__Actinomycetospora_sp.
bASV1845	29	0.347961	2979.6	-0.861123	0	Peripherals	d__Bacteria; p__Bacteroidota; c__Bacteroidia; o__Chitinophagales; f__Chitinophagaceae
bASV1846	81	0.363669	901.596	-0.399911	0	Peripherals	d__Bacteria; p__Proteobacteria; c__Gammaproteobacteria; o__Burkholderiales; f__Nitrosomonadaceae; g__mle1-7
bASV1848	36	0.356334	3.93496	-0.799037	0.106911	Peripherals	d__Bacteria; p__MBNT15; c__MBNT15; o__MBNT15; f__MBNT15; g__MBNT15; s__uncultured_Syntrophobacteraceae
bASV185	46	0.360609	177.856	-0.710342	0	Peripherals	d__Bacteria; p__Actinobacteriota; c__Thermoleophilia; o__Gaiellales; f__Gaiellaceae; g__Gaiella; s__uncultured_Rubrobacteria
bASV1850	81	0.395911	58.1775	-0.477817	0	Peripherals	d__Bacteria; p__Myxococcota; c__Polyangia; o__Polyangiales; f__Sandaracinaceae; g__uncultured
bASV1853	85	0.3916	324.219	-0.44878	0	Peripherals	d__Bacteria; p__Acidobacteriota; c__Subgroup_22; o__Subgroup_22; f__Subgroup_22; g__Subgroup_22; s__uncultured_proteobacterium
bASV1854	2	0.28539	0	-1.1006	0	Peripherals	d__Bacteria; p__Actinobacteriota; c__Thermoleophilia; o__Gaiellales; f__uncultured; g__uncultured
bASV1855	54	0.371724	432.373	-0.673817	0	Peripherals	d__Bacteria; p__Acidobacteriota; c__Subgroup_5; o__Subgroup_5; f__Subgroup_5; g__Subgroup_5
bASV1856	232	0.412536	210.816	0.939376	0.408163	Peripherals	d__Bacteria; p__Acidobacteriota; c__Acidobacteriae; o__Solibacterales; f__Solibacteraceae; g__Candidatus_Solibacter
bASV1857	3	0.331468	0.0227273	-1.04404	0.00865785	Peripherals	d__Bacteria; p__Actinobacteriota; c__Actinobacteria; o__Pseudonocardiales; f__Pseudonocardiaceae; g__Pseudonocardia
bASV1858	144	0.384498	706.736	0.158864	0	Peripherals	d__Bacteria; p__Proteobacteria; c__Alphaproteobacteria; o__Acetobacterales; f__Acetobacteraceae; g__uncultured; s__metagenome
bASV1859	279	0.449453	8293.51	0.959515	0.202003	Peripherals	d__Bacteria; p__Desulfobacterota; c__uncultured; o__uncultured; f__uncultured; g__uncultured; s__uncultured_proteobacterium
bASV1862	1	0.26972	0	-1.10947	0.392775	Peripherals	d__Bacteria; p__Proteobacteria; c__Gammaproteobacteria; o__Gammaproteobacteria; f__Gammaproteobacteria; g__Gammaproteobacteria; s__uncultured_bacterium
bASV1863	6	0.270154	490.368	0.435479	0	Peripherals	d__Bacteria; p__Firmicutes; c__Bacilli; o__Paenibacillales; f__Paenibacillaceae; g__Paenibacillus
bASV1866	148	0.401836	3834.54	0.00855298	0.211836	Peripherals	d__Bacteria; p__Actinobacteriota; c__Actinobacteria; o__Propionibacteriales; f__Propionibacteriaceae; g__uncultured; s__metagenome
bASV1867	151	0.418189	124.547	0.0303307	0.0352827	Peripherals	d__Bacteria; p__Chloroflexi; c__JG30-KF-CM66; o__JG30-KF-CM66; f__JG30-KF-CM66; g__JG30-KF-CM66; s__uncultured_Chloroflexi
bASV187	6	0.319835	0.813553	-1.06512	0.0433522	Peripherals	d__Bacteria; p__Acidobacteriota; c__Subgroup_5; o__Subgroup_5; f__Subgroup_5; g__Subgroup_5; s__uncultured_bacterium
bASV1873	27	0.353954	1.99099	-0.878862	0	Peripherals	d__Bacteria; p__Chloroflexi; c__Ktedonobacteria; o__Ktedonobacterales; f__JG30-KF-AS9; g__JG30-KF-AS9; s__uncultured_bacterium
bASV1874	198	0.419758	1901.55	0.637814	0.0617927	Peripherals	d__Bacteria; p__Acidobacteriota; c__Acidobacteriae; o__Solibacterales; f__Solibacteraceae; g__Candidatus_Solibacter; s__uncultured_bacterium
bASV1876	185	0.400956	107.936	0.277145	0	Peripherals	d__Bacteria; p__Verrucomicrobiota; c__Verrucomicrobiae; o__Pedosphaerales; f__Pedosphaeraceae; g__Ellin517; s__uncultured_bacterium
bASV1877	266	0.416977	1854.52	0.865145	0	Peripherals	d__Bacteria; p__Proteobacteria; c__Alphaproteobacteria; o__Rhizobiales; f__Xanthobacteraceae; g__Rhodoplanes
bASV1878	271	0.440797	1338.03	0.901441	0.48	Peripherals	d__Bacteria; p__Entotheonellaeota; c__Entotheonellia; o__Entotheonellales; f__Entotheonellaceae; g__Entotheonellaceae
bASV188	385	0.470781	4063.34	1.729	0.0288955	Peripherals	d__Bacteria; p__Chloroflexi; c__Dehalococcoidia; o__S085; f__S085; g__S085; s__uncultured_bacterium
bASV1881	45	0.358682	26.376	-0.73915	0.48	Peripherals	d__Bacteria; p__Bacteroidota; c__Bacteroidia; o__Cytophagales; f__Hymenobacteraceae; g__Adhaeribacter
bASV1883	9	0.277831	2410.62	-1.00048	0	Peripherals	d__Bacteria; p__Bacteroidota; c__Bacteroidia; o__Chitinophagales; f__Chitinophagaceae; g__Parafilimonas; s__uncultured_bacterium
bASV1884	147	0.374419	159.394	0.185472	0	Peripherals	d__Bacteria; p__Actinobacteriota; c__Thermoleophilia; o__Gaiellales; f__uncultured; g__uncultured; s__uncultured_Rubrobacteria
bASV1885	45	0.362295	610.082	-0.73915	0	Peripherals	d__Bacteria; p__Actinobacteriota; c__Thermoleophilia; o__Solirubrobacterales; f__67-14; g__67-14; s__uncultured_bacterium
bASV1888	96	0.365584	5.99463	-0.26687	0	Peripherals	d__Bacteria; p__Desulfobacterota; c__uncultured; o__uncultured; f__uncultured; g__uncultured
bASV1889	95	0.382599	8.04736	-0.376187	0	Peripherals	d__Bacteria; p__Proteobacteria; c__Gammaproteobacteria; o__Burkholderiales; f__Nitrosomonadaceae; g__MND1
bASV189	610	0.518538	28704.2	3.36233	0.442761	Module hubs	d__Bacteria; p__Proteobacteria; c__Gammaproteobacteria; o__Burkholderiales; f__Comamonadaceae
bASV1891	51	0.373794	11.1722	-0.695595	0.0713306	Peripherals	d__Bacteria; p__Myxococcota; c__Myxococcia; o__Myxococcales; f__Myxococcaceae
bASV1893	277	0.416891	1681.99	0.944997	0	Peripherals	d__Bacteria; p__Chloroflexi; c__Chloroflexia; o__Chloroflexales; f__Roseiflexaceae; g__uncultured; s__uncultured_Chloroflexi
bASV1898	302	0.455862	1640.44	1.56024	0	Peripherals	d__Bacteria; p__Proteobacteria; c__Alphaproteobacteria; o__Elsterales; f__uncultured; g__uncultured; s__uncultured_Alphaproteobacteria
bASV19	8	0.202473	5220.22	0.722877	0.027392	Peripherals	d__Bacteria; p__Proteobacteria; c__Gammaproteobacteria; o__Xanthomonadales; f__Xanthomonadaceae; g__Stenotrophomonas
bASV190	225	0.436687	7029.42	0.567516	0	Peripherals	d__Bacteria; p__Proteobacteria; c__Alphaproteobacteria; o__Rhizobiales; f__Hyphomicrobiaceae; g__Pedomicrobium; s__uncultured_Alphaproteobacteria
bASV1901	8	0.305986	0.669551	-1.04738	0.336735	Peripherals	d__Bacteria; p__Proteobacteria; c__Gammaproteobacteria; o__Burkholderiales; f__Nitrosomonadaceae; g__mle1-7; s__uncultured_beta
bASV1904	306	0.448253	1926.56	1.59572	0.123059	Peripherals	d__Bacteria; p__Proteobacteria; c__Alphaproteobacteria; o__Reyranellales; f__Reyranellaceae; g__Reyranella
bASV1905	142	0.418711	4694.36	-0.0350025	0	Peripherals	d__Bacteria; p__Acidobacteriota; c__Subgroup_11; o__Subgroup_11; f__Subgroup_11; g__Subgroup_11; s__uncultured_bacterium
bASV1908	268	0.434426	1189.97	0.879663	0	Peripherals	d__Bacteria; p__Proteobacteria; c__Gammaproteobacteria; o__JG36-GS-52; f__JG36-GS-52; g__JG36-GS-52; s__uncultured_gamma
bASV191	367	0.475449	5137.83	1.59833	0	Peripherals	d__Bacteria; p__Actinobacteriota; c__MB-A2-108; o__MB-A2-108; f__MB-A2-108; g__MB-A2-108
bASV1910	179	0.408685	1347.03	0.469295	0	Peripherals	d__Bacteria; p__Acidobacteriota; c__Acidobacteriae; o__Subgroup_2; f__Subgroup_2; g__Subgroup_2; s__uncultured_bacterium
bASV1911	1	0.28535	0	-1.05856	0	Peripherals	d__Bacteria; p__Gemmatimonadota; c__Gemmatimonadetes; o__Gemmatimonadales; f__Gemmatimonadaceae; g__uncultured
bASV1914	94	0.354453	196.048	-0.284608	0	Peripherals	d__Bacteria; p__Proteobacteria; c__Gammaproteobacteria; o__Burkholderiales; f__Nitrosomonadaceae; g__966-1; s__uncultured_beta
bASV1917	33	0.370085	9.75883	-0.826261	0.318065	Peripherals	d__Bacteria; p__Proteobacteria; c__Gammaproteobacteria; o__Burkholderiales; f__Comamonadaceae; g__Rhizobacter
bASV192	338	0.468046	30576.1	1.87954	0	Peripherals	d__Bacteria; p__Actinobacteriota; c__Actinobacteria; o__Frankiales; f__Acidothermaceae; g__Acidothermus; s__uncultured_bacterium
bASV1922	13	0.315081	1.90969	-1.00303	0	Peripherals	d__Bacteria; p__Proteobacteria; c__Gammaproteobacteria; o__Burkholderiales; f__Nitrosomonadaceae; g__Ellin6067
bASV1923	96	0.396613	1464.27	-0.368928	0	Peripherals	d__Bacteria; p__Proteobacteria; c__Gammaproteobacteria; o__CCD24; f__CCD24; g__CCD24
bASV1924	163	0.411693	2128.14	0.117442	0.0252343	Peripherals	d__Bacteria; p__Proteobacteria; c__Alphaproteobacteria; o__Rhizobiales; f__Xanthobacteraceae; g__Pseudolabrys
bASV1925	126	0.357599	6.14523	-0.000786024	0.404562	Peripherals	d__Bacteria; p__Chloroflexi; c__TK10; o__TK10; f__TK10; g__TK10; s__uncultured_bacterium
bASV1926	63	0.355328	0.213232	-0.559561	0.460224	Peripherals	d__Bacteria; p__Proteobacteria; c__Alphaproteobacteria; o__uncultured; f__uncultured; g__uncultured
bASV1927	30	0.350505	11.4063	-0.852253	0	Peripherals	d__Bacteria; p__Acidobacteriota; c__Subgroup_5; o__Subgroup_5; f__Subgroup_5; g__Subgroup_5; s__uncultured_bacterium
bASV1928	4	0.335723	0	-1.03678	0	Peripherals	d__Bacteria; p__Actinobacteriota; c__Actinobacteria; o__Micromonosporales; f__Micromonosporaceae
bASV1929	61	0.378856	225.697	-0.623002	0	Peripherals	d__Bacteria; p__NB1-j; c__NB1-j; o__NB1-j; f__NB1-j; g__NB1-j
bASV193	296	0.447357	2094.48	1.08292	0.0134222	Peripherals	d__Bacteria; p__Acidobacteriota; c__Subgroup_11; o__Subgroup_11; f__Subgroup_11; g__Subgroup_11; s__uncultured_bacterium
bASV1930	6	0.319075	14.9426	-1.02226	0.307643	Peripherals	d__Bacteria; p__Proteobacteria; c__Alphaproteobacteria; o__Sphingomonadales; f__Sphingomonadaceae; g__Sphingomonas
bASV1931	164	0.409266	138.042	0.124701	0	Peripherals	d__Bacteria; p__Myxococcota; c__Polyangia; o__Polyangiales; f__BIrii41; g__BIrii41; s__uncultured_delta
bASV1935	245	0.429058	989.601	1.05468	0.04875	Peripherals	d__Bacteria; p__Proteobacteria; c__Alphaproteobacteria; o__Elsterales; f__uncultured; g__uncultured
bASV1937	65	0.36223	890.15	-0.541823	0	Peripherals	d__Bacteria; p__Proteobacteria; c__Alphaproteobacteria; o__Rhizobiales; f__Hyphomicrobiaceae; g__Pedomicrobium; s__uncultured_bacterium
bASV1939	39	0.364327	7.1991	-0.782706	0	Peripherals	d__Bacteria; p__Actinobacteriota; c__Actinobacteria; o__Micromonosporales; f__Micromonosporaceae; g__Luedemannella; s__uncultured_bacterium
bASV194	83	0.404987	795.432	-0.463299	0	Peripherals	d__Bacteria; p__Actinobacteriota; c__Actinobacteria; o__Streptomycetales; f__Streptomycetaceae; g__Streptomyces
bASV1940	12	0.342226	856.174	-0.978706	0.229747	Peripherals	d__Bacteria; p__Actinobacteriota; c__Actinobacteria; o__PeM15; f__PeM15; g__PeM15
bASV1941	261	0.444788	15226.3	0.828849	0	Peripherals	d__Bacteria; p__Actinobacteriota; c__MB-A2-108; o__MB-A2-108; f__MB-A2-108; g__MB-A2-108
bASV1943	3	0.295135	0.356768	-1.09173	0.112924	Peripherals	d__Bacteria; p__Proteobacteria; c__Alphaproteobacteria; o__Rhizobiales; f__D05-2; g__D05-2; s__uncultured_bacterium
bASV1946	83	0.360803	69.001	-0.382172	0.244898	Peripherals	d__Bacteria; p__Chloroflexi; c__TK10; o__TK10; f__TK10; g__TK10
bASV1947	251	0.387606	198.771	1.1079	0	Peripherals	d__Bacteria; p__Chloroflexi; c__TK10; o__TK10; f__TK10; g__TK10
bASV195	363	0.470781	4016.72	2.10127	0	Peripherals	d__Bacteria; p__Proteobacteria; c__Alphaproteobacteria; o__Rhizobiales; f__Xanthobacteraceae; g__uncultured
bASV1950	1	0.281285	0	-1.05856	0.0983265	Peripherals	d__Bacteria; p__Bacteroidota; c__Bacteroidia; o__Sphingobacteriales; f__AKYH767; g__AKYH767
bASV1955	139	0.362361	18.129	0.114517	0	Peripherals	d__Bacteria; p__Actinobacteriota; c__Acidimicrobiia; o__IMCC26256; f__IMCC26256; g__IMCC26256
bASV1957	17	0.353581	21.9121	-0.967556	0	Peripherals	d__Bacteria; p__Proteobacteria; c__Gammaproteobacteria; o__Xanthomonadales; f__Xanthomonadaceae; g__Lysobacter
bASV196	376	0.465342	3190.78	2.21658	0	Peripherals	d__Bacteria; p__Acidobacteriota; c__Acidobacteriae; o__Acidobacteriales; f__uncultured; g__uncultured
bASV1962	41	0.356271	220.919	-0.768187	0.42	Peripherals	d__Bacteria; p__MBNT15; c__MBNT15; o__MBNT15; f__MBNT15; g__MBNT15; s__uncultured_bacterium
bASV1963	105	0.378216	2234.99	-0.187044	0.303298	Peripherals	d__Bacteria; p__Proteobacteria; c__Alphaproteobacteria; o__Rhizobiales; f__Rhizobiaceae; g__Mesorhizobium
bASV1964	4	0.315131	0	-1.03678	0.19306	Peripherals	d__Bacteria; p__Actinobacteriota; c__Actinobacteria; o__Micrococcales; f__Intrasporangiaceae
bASV1966	319	0.444788	2052.72	1.24989	0	Peripherals	d__Bacteria; p__Actinobacteriota; c__Acidimicrobiia; o__Microtrichales; f__uncultured; g__uncultured; s__metagenome
bASV1968	288	0.439738	8843.21	1.02485	0	Peripherals	d__Bacteria; p__Actinobacteriota; c__Acidimicrobiia; o__Microtrichales
bASV1969	1	0.262924	0	-1.10947	0	Peripherals	d__Bacteria; p__Actinobacteriota; c__Acidimicrobiia; o__Acidimicrobiales; f__Acidimicrobiaceae; g__uncultured; s__uncultured_bacterium
bASV197	2	0.24597	0	-1.1006	0	Peripherals	d__Bacteria; p__Proteobacteria; c__Alphaproteobacteria; o__Rhizobiales; f__Rhizobiaceae; g__Allorhizobium-Neorhizobium-Pararhizobium-Rhizobium; s__Rhizobium_rhizogenes
bASV1975	222	0.399921	165.716	0.545738	0.146382	Peripherals	d__Bacteria; p__Actinobacteriota; c__Thermoleophilia; o__Solirubrobacterales; f__67-14; g__67-14
bASV1976	72	0.389781	98.4839	-0.54315	0.0806648	Peripherals	d__Bacteria; p__Proteobacteria; c__Alphaproteobacteria; o__uncultured; f__uncultured; g__uncultured
bASV1979	54	0.374977	22.1072	-0.673817	0.237024	Peripherals	d__Bacteria; p__Proteobacteria; c__Alphaproteobacteria; o__Caulobacterales; f__Hyphomonadaceae; g__Hirschia; s__uncultured_bacterium
bASV198	177	0.429424	1952.58	0.219071	0	Peripherals	d__Bacteria; p__Proteobacteria; c__Alphaproteobacteria; o__Reyranellales; f__Reyranellaceae; g__Reyranella
bASV1981	77	0.360415	165.817	-0.435389	0	Peripherals	d__Bacteria; p__Proteobacteria; c__Alphaproteobacteria; o__Rhizobiales; f__KF-JG30-B3; g__KF-JG30-B3
bASV1983	4	0.338431	0	-1.03678	0	Peripherals	d__Bacteria; p__Proteobacteria; c__Alphaproteobacteria; o__Sphingomonadales; f__Sphingomonadaceae
bASV1984	73	0.358427	281.043	-0.470867	0	Peripherals	d__Bacteria; p__Proteobacteria; c__Alphaproteobacteria; o__Rhizobiales; f__Xanthobacteraceae; g__uncultured
bASV1985	1	0.31162	0	-1.10947	0	Peripherals	d__Bacteria; p__Actinobacteriota; c__Actinobacteria; o__Pseudonocardiales; f__Pseudonocardiaceae; g__Crossiella; s__uncultured_bacterium
bASV1986	133	0.387457	16.6296	-0.100336	0	Peripherals	d__Bacteria; p__Actinobacteriota; c__MB-A2-108; o__MB-A2-108; f__MB-A2-108; g__MB-A2-108
bASV1987	39	0.371793	2314.65	-0.782706	0.0776114	Peripherals	d__Bacteria; p__Proteobacteria; c__Alphaproteobacteria; o__Rhizobiales; f__Xanthobacteraceae; g__uncultured
bASV199	18	0.341761	503.964	-0.93515	0.0546017	Peripherals	d__Bacteria; p__Actinobacteriota; c__Thermoleophilia; o__Solirubrobacterales; f__67-14; g__67-14
bASV1990	8	0.323171	4026.65	-1.00774	0.0147051	Peripherals	d__Bacteria; p__Actinobacteriota; c__Actinobacteria; o__Propionibacteriales; f__Nocardioidaceae
bASV1991	246	0.422134	1241	0.71996	0	Peripherals	d__Bacteria; p__Proteobacteria; c__Gammaproteobacteria; o__Burkholderiales; f__Comamonadaceae
bASV1992	58	0.342168	596.859	-0.603909	0.384088	Peripherals	d__Bacteria; p__Proteobacteria; c__Alphaproteobacteria; o__Rhizobiales; f__Xanthobacteraceae
bASV1994	49	0.357472	4749.66	-0.683734	0	Peripherals	d__Bacteria; p__Bacteroidota; c__Bacteroidia; o__Chitinophagales; f__Chitinophagaceae; g__Puia; s__metagenome
bASV1995	28	0.335276	12.5897	-0.869992	0	Peripherals	d__Bacteria; p__Proteobacteria; c__Gammaproteobacteria; o__Burkholderiales; f__Nitrosomonadaceae; g__Ellin6067
bASV1996	143	0.393975	202.749	-0.0277433	0	Peripherals	d__Bacteria; p__Verrucomicrobiota; c__Verrucomicrobiae; o__Pedosphaerales; f__Pedosphaeraceae; g__uncultured
bASV1999	27	0.32887	3.47007	-0.878862	0	Peripherals	d__Bacteria; p__Actinobacteriota; c__Thermoleophilia; o__Gaiellales; f__uncultured; g__uncultured
bASV2	13	0.252856	11926.8	1.94978	0.375	Peripherals	d__Bacteria; p__Proteobacteria; c__Gammaproteobacteria; o__Enterobacterales; f__Enterobacteriaceae
bASV20	5	0.252255	0	-0.0132638	0	Peripherals	d__Bacteria; p__Proteobacteria; c__Gammaproteobacteria; o__Enterobacterales; f__Enterobacteriaceae; g__Enterobacter
bASV200	169	0.426063	3096.48	0.160997	0	Peripherals	d__Bacteria; p__Proteobacteria; c__Gammaproteobacteria; o__Burkholderiales; f__B1-7BS; g__B1-7BS; s__uncultured_bacterium
bASV2000	113	0.374071	172.443	-0.116089	0	Peripherals	d__Bacteria; p__Acidobacteriota; c__Acidobacteriae; o__Acidobacteriales; f__uncultured; g__uncultured
bASV2002	124	0.408685	2671.32	-0.165669	0	Peripherals	d__Bacteria; p__Actinobacteriota; c__Thermoleophilia; o__Gaiellales
bASV2003	10	0.321674	2550.21	-1.02964	0	Peripherals	d__Bacteria; p__Armatimonadota; c__Fimbriimonadia; o__Fimbriimonadales; f__Fimbriimonadaceae; g__Fimbriimonadaceae; s__uncultured_Armatimonadetes
bASV2007	165	0.418972	252.455	0.13196	0.551111	Peripherals	d__Bacteria; p__Bacteroidota; c__Kryptonia; o__Kryptoniales; f__BSV26; g__BSV26; s__uncultured_bacterium
bASV201	125	0.423643	266.094	-0.15841	0.187619	Peripherals	d__Bacteria; p__Proteobacteria; c__Gammaproteobacteria; o__Burkholderiales; f__Comamonadaceae; g__Variovorax; s__Variovorax_soli
bASV2010	8	0.296656	2.28723	-1.04738	0.514556	Peripherals	d__Bacteria; p__Acidobacteriota; c__Subgroup_11; o__Subgroup_11; f__Subgroup_11; g__Subgroup_11; s__uncultured_bacterium
bASV2011	8	0.338487	0.074278	-1.00774	0.0456703	Peripherals	d__Bacteria; p__Verrucomicrobiota; c__Verrucomicrobiae; o__Pedosphaerales; f__Pedosphaeraceae; g__ADurb.Bin063-1
bASV2012	192	0.379142	2204.17	0.584598	0	Peripherals	d__Bacteria; p__Proteobacteria; c__Gammaproteobacteria; o__Burkholderiales; f__Burkholderiaceae; g__Burkholderia-Caballeronia-Paraburkholderia
bASV2013	301	0.419583	2415.6	1.11922	0.025802	Peripherals	d__Bacteria; p__Actinobacteriota; c__Thermoleophilia; o__Gaiellales; f__Gaiellaceae; g__Gaiella; s__uncultured_bacterium
bASV2016	26	0.353395	811.965	-0.887731	0	Peripherals	d__Bacteria; p__Actinobacteriota; c__Thermoleophilia; o__Gaiellales; f__uncultured; g__uncultured
bASV202	325	0.459084	2274.71	1.76423	0	Peripherals	d__Bacteria; p__Proteobacteria; c__Alphaproteobacteria; o__Rhizobiales; f__Xanthobacteraceae; g__uncultured
bASV2020	269	0.41035	568.375	0.886923	0.404118	Peripherals	d__Bacteria; p__Actinobacteriota; c__Thermoleophilia; o__Solirubrobacterales; f__67-14; g__67-14
bASV2023	29	0.344274	0.0788719	-0.861123	0.0307617	Peripherals	d__Bacteria; p__Proteobacteria; c__Gammaproteobacteria; o__Gammaproteobacteria_Incertae_Sedis; f__Unknown_Family; g__Acidibacter; s__uncultured_gamma
bASV2025	112	0.367518	2898.09	-0.124958	0	Peripherals	d__Bacteria; p__Proteobacteria; c__Alphaproteobacteria; o__Rhizobiales; f__Labraceae; g__Labrys; s__uncultured_bacterium
bASV2026	303	0.447854	1055.56	1.13374	0.46875	Peripherals	d__Bacteria; p__Verrucomicrobiota; c__Verrucomicrobiae; o__Pedosphaerales; f__Pedosphaeraceae; g__uncultured; s__uncultured_Verrucomicrobia
bASV2028	301	0.418016	535.358	1.55137	0	Peripherals	d__Bacteria; p__Acidobacteriota; c__Acidobacteriae; o__Solibacterales; f__Solibacteraceae; g__Candidatus_Solibacter
bASV203	176	0.425703	1221.2	0.211812	0	Peripherals	d__Bacteria; p__Actinobacteriota; c__Actinobacteria; o__Propionibacteriales; f__Nocardioidaceae; g__Nocardioides
bASV2030	58	0.376378	3.53643	-0.64478	0.206559	Peripherals	d__Bacteria; p__Proteobacteria; c__Gammaproteobacteria; o__Gammaproteobacteria_Incertae_Sedis; f__Unknown_Family; g__Acidibacter
bASV2032	30	0.345514	25.0858	-0.852253	0.0284976	Peripherals	d__Bacteria; p__Gemmatimonadota; c__Gemmatimonadetes; o__Gemmatimonadales; f__Gemmatimonadaceae; g__Gemmatimonas
bASV2034	234	0.400477	329.73	0.632849	0	Peripherals	d__Bacteria; p__Actinobacteriota; c__MB-A2-108; o__MB-A2-108; f__MB-A2-108; g__MB-A2-108; s__uncultured_bacterium
bASV2036	48	0.359964	29.3416	-0.717372	0.442742	Peripherals	d__Bacteria; p__Actinobacteriota; c__Thermoleophilia; o__Gaiellales; f__Gaiellaceae; g__Gaiella
bASV2038	131	0.375116	276.285	0.0435612	0.0918906	Peripherals	d__Bacteria; p__Acidobacteriota; c__Acidobacteriae; o__Acidobacteriales; f__uncultured; g__uncultured
bASV2039	16	0.342692	25.4908	-0.949669	0	Peripherals	d__Bacteria; p__Actinobacteriota; c__Thermoleophilia; o__Solirubrobacterales; f__Solirubrobacteraceae; g__Solirubrobacter; s__Solirubrobacter_sp.
bASV2040	30	0.33076	18.7141	-0.852253	0	Peripherals	d__Bacteria; p__Actinobacteriota; c__Actinobacteria; o__Micrococcales; f__Microbacteriaceae; g__Agromyces
bASV2041	19	0.323586	3.49704	-0.927891	0	Peripherals	d__Bacteria; p__Verrucomicrobiota; c__Verrucomicrobiae; o__Pedosphaerales; f__Pedosphaeraceae
bASV2042	185	0.404093	48.9644	0.277145	0.1437	Peripherals	d__Bacteria; p__Acidobacteriota; c__Thermoanaerobaculia; o__Thermoanaerobaculales; f__Thermoanaerobaculaceae; g__Subgroup_10; s__uncultured_bacterium
bASV2043	169	0.393667	91.6879	0.160997	0	Peripherals	d__Bacteria; p__Verrucomicrobiota; c__Verrucomicrobiae; o__Pedosphaerales; f__Pedosphaeraceae; g__Pedosphaeraceae
bASV2045	3	0.259402	18.211	-0.54131	0	Peripherals	d__Bacteria; p__Proteobacteria; c__Alphaproteobacteria; o__Rhizobiales; f__A0839; g__A0839
bASV2046	67	0.387979	662.773	-0.579447	0	Peripherals	d__Bacteria; p__Bdellovibrionota; c__Oligoflexia; o__Oligoflexales; f__Oligoflexales; g__Oligoflexus; s__uncultured_bacterium
bASV205	16	0.332838	2.40274	-0.976426	0.035809	Peripherals	d__Bacteria; p__Actinobacteriota; c__Actinobacteria; o__Micromonosporales; f__Micromonosporaceae
bASV2051	42	0.363801	19.7868	-0.74582	0.152778	Peripherals	d__Bacteria; p__Actinobacteriota; c__Actinobacteria; o__Streptosporangiales; f__Streptosporangiaceae; g__Nonomuraea
bASV2053	20	0.326683	40.4038	-0.940948	0	Peripherals	d__Bacteria; p__Proteobacteria; c__Alphaproteobacteria; o__Rhizobiales; f__Rhizobiaceae; g__Mesorhizobium; s__metagenome
bASV2055	146	0.369541	15.8469	0.176603	0	Peripherals	d__Bacteria; p__Desulfobacterota; c__uncultured; o__uncultured; f__uncultured; g__uncultured; s__uncultured_proteobacterium
bASV2057	240	0.427238	389.602	1.01033	0.0700826	Peripherals	d__Bacteria; p__Proteobacteria; c__Alphaproteobacteria; o__Acetobacterales; f__Acetobacteraceae; g__uncultured; s__uncultured_bacterium
bASV2058	37	0.373516	383.783	-0.797224	0.454346	Peripherals	d__Bacteria; p__Actinobacteriota; c__MB-A2-108; o__MB-A2-108; f__MB-A2-108; g__MB-A2-108; s__uncultured_Micromonospora
bASV2059	167	0.38963	67.1286	0.146479	0	Peripherals	d__Bacteria; p__Chloroflexi; c__TK10; o__TK10; f__TK10; g__TK10; s__uncultured_Firmicutes
bASV206	326	0.477591	8217.04	1.3007	0	Peripherals	d__Bacteria; p__Proteobacteria; c__Alphaproteobacteria; o__Rhizobiales; f__Rhizobiaceae; g__Mesorhizobium; s__metagenome
bASV2061	10	0.355956	0.0427688	-0.993224	0.182902	Peripherals	d__Bacteria; p__Proteobacteria; c__Alphaproteobacteria; o__Azospirillales; f__Inquilinaceae; g__Inquilinus; s__Inquilinus_sp.
bASV2063	202	0.426424	252.031	0.400553	0	Peripherals	d__Bacteria; p__Planctomycetota; c__Phycisphaerae; o__Phycisphaerales; f__Phycisphaeraceae; g__SM1A02
bASV2066	27	0.349168	46.6846	-0.878862	0	Peripherals	d__Bacteria; p__Firmicutes; c__Bacilli; o__Paenibacillales; f__Paenibacillaceae; g__Paenibacillus; s__Paenibacillus_aceris
bASV207	353	0.482742	15653.3	1.4967	0.274836	Peripherals	d__Bacteria; p__Myxococcota; c__Myxococcia; o__Myxococcales; f__Vulgatibacteraceae; g__Vulgatibacter; s__uncultured_bacterium
bASV2070	193	0.375326	67.5219	0.593467	0.0948026	Peripherals	d__Bacteria; p__Proteobacteria; c__Alphaproteobacteria; o__Elsterales; f__uncultured; g__uncultured; s__uncultured_Rhodospirillaceae
bASV2072	248	0.408271	174.687	1.08129	0	Peripherals	d__Bacteria; p__Chloroflexi; c__TK10; o__TK10; f__TK10; g__TK10
bASV2073	125	0.376097	1560.18	-0.00965547	0.00586505	Peripherals	d__Bacteria; p__Proteobacteria; c__Alphaproteobacteria; o__Rhizobiales; f__Xanthobacteraceae; g__uncultured
bASV208	268	0.465557	12646.1	0.879663	0	Peripherals	d__Bacteria; p__Actinobacteriota; c__Thermoleophilia; o__Gaiellales; f__uncultured; g__uncultured
bASV2080	1	0.278716	0	-1.05856	0	Peripherals	d__Bacteria; p__Proteobacteria; c__Alphaproteobacteria; o__Rhizobiales; f__Xanthobacteraceae; g__Pseudolabrys; s__uncultured_Bradyrhizobiaceae
bASV2082	76	0.357156	44.2447	-0.444259	0	Peripherals	d__Bacteria; p__Proteobacteria; c__Gammaproteobacteria; o__WD260; f__WD260; g__WD260
bASV2084	6	0.319024	2.30145	-1.06512	0	Peripherals	d__Bacteria; p__Actinobacteriota; c__Actinobacteria; o__Propionibacteriales; f__Nocardioidaceae; g__Nocardioides
bASV2087	2	0.273641	0.335662	-1.0513	0.554688	Peripherals	d__Bacteria; p__Actinobacteriota; c__Thermoleophilia; o__Gaiellales; f__uncultured; g__uncultured
bASV2088	323	0.428967	551.831	1.27892	0	Peripherals	d__Bacteria; p__Myxococcota; c__Polyangia; o__Polyangiales; f__Phaselicystidaceae; g__Phaselicystis; s__uncultured_bacterium
bASV2089	77	0.36223	19.119	-0.435389	0.5	Peripherals	d__Bacteria; p__Proteobacteria; c__Alphaproteobacteria; o__Elsterales; f__uncultured; g__uncultured
bASV209	86	0.400637	3365.79	-0.441521	0.244043	Peripherals	d__Bacteria; p__Actinobacteriota; c__Actinobacteria; o__Corynebacteriales; f__Mycobacteriaceae; g__Mycobacterium
bASV2094	4	0.351116	0	-1.03678	0	Peripherals	d__Bacteria; p__Proteobacteria; c__Alphaproteobacteria; o__Rhizobiales; f__A0839; g__A0839
bASV2095	1	0.274949	0	-1.10947	0	Peripherals	d__Bacteria; p__Proteobacteria; c__Gammaproteobacteria; o__Burkholderiales; f__Nitrosomonadaceae; g__mle1-7
bASV2099	246	0.43071	256.256	1.06355	0	Peripherals	d__Bacteria; p__Proteobacteria; c__Alphaproteobacteria; o__Elsterales; f__uncultured; g__uncultured
bASV21	49	0.37248	1146.36	-0.683734	0	Peripherals	d__Bacteria; p__Firmicutes; c__Bacilli; o__Bacillales; f__Bacillaceae; g__Bacillus
bASV210	170	0.420547	1717.23	0.38947	0.133071	Peripherals	d__Bacteria; p__Proteobacteria; c__Alphaproteobacteria; o__Rhizobiales; f__Xanthobacteraceae; g__uncultured
bASV2100	4	0.298503	1.0321	-1.03678	0	Peripherals	d__Bacteria; p__Proteobacteria; c__Alphaproteobacteria; o__Rhizobiales; f__Xanthobacteraceae
bASV2103	9	0.332015	8.62622	-1.00048	0.444444	Peripherals	d__Bacteria; p__Acidobacteriota; c__Subgroup_5; o__Subgroup_5; f__Subgroup_5; g__Subgroup_5; s__uncultured_Acidobacteria
bASV2104	81	0.378785	29.2196	-0.477817	0	Peripherals	d__Bacteria; p__Proteobacteria; c__Gammaproteobacteria; o__Burkholderiales; f__Nitrosomonadaceae; g__IS-44; s__uncultured_bacterium
bASV2106	10	0.346584	0.0797905	-0.993224	0.0312421	Peripherals	d__Bacteria; p__Actinobacteriota; c__Acidimicrobiia
bASV2109	46	0.374907	308.535	-0.731891	0.2688	Peripherals	d__Bacteria; p__Acidobacteriota; c__Acidobacteriae; o__Acidobacteriae; f__Acidobacteriae; g__Paludibaculum
bASV211	203	0.403526	183.933	0.682162	0	Peripherals	d__Bacteria; p__Chloroflexi; c__AD3; o__AD3; f__AD3; g__AD3; s__uncultured_bacterium
bASV2112	218	0.40515	240.706	0.815203	0	Peripherals	d__Bacteria; p__Verrucomicrobiota; c__Verrucomicrobiae; o__Pedosphaerales; f__Pedosphaeraceae; g__Pedosphaera
bASV2115	5	0.326365	0	-1.02952	0	Peripherals	d__Bacteria; p__Firmicutes; c__Bacilli; o__Bacillales; f__Bacillaceae; g__Bacillus
bASV2119	251	0.434614	1897.29	0.756256	0	Peripherals	d__Bacteria; p__Chloroflexi; c__TK10; o__TK10; f__TK10; g__TK10; s__uncultured_bacterium
bASV2121	112	0.385824	14.9141	-0.25278	0	Peripherals	d__Bacteria; p__Actinobacteriota; c__Actinobacteria; o__Pseudonocardiales; f__Pseudonocardiaceae; g__Actinophytocola; s__Actinophytocola_sp.
bASV2127	1	0.2541	0	-1.10947	0.456104	Peripherals	d__Bacteria; p__Actinobacteriota; c__Acidimicrobiia; o__Microtrichales; f__Iamiaceae; g__Iamia
bASV2130	266	0.415686	2122.71	0.865145	0	Peripherals	d__Bacteria; p__Chloroflexi; c__TK10; o__TK10; f__TK10; g__TK10; s__uncultured_bacterium
bASV2131	128	0.392516	28.3833	-0.136632	0	Peripherals	d__Bacteria; p__Proteobacteria; c__Gammaproteobacteria; o__Burkholderiales; f__Nitrosomonadaceae; g__mle1-7
bASV2132	366	0.458561	4388.21	2.12788	0	Peripherals	d__Bacteria; p__Proteobacteria; c__Alphaproteobacteria; o__Rhizobiales; f__Hyphomicrobiaceae; g__Hyphomicrobium
bASV2133	6	0.308092	7.75743	-1.02226	0	Peripherals	d__Bacteria; p__Proteobacteria; c__Alphaproteobacteria; o__Rhizobiales; f__Xanthobacteraceae; g__uncultured
bASV2135	103	0.401035	2742.22	-0.318113	0	Peripherals	d__Bacteria; p__Actinobacteriota; c__Thermoleophilia; o__Solirubrobacterales; f__Solirubrobacteraceae; g__Solirubrobacter; s__uncultured_bacterium
bASV2136	30	0.344332	317.6	1.01211	0.0251005	Peripherals	d__Bacteria; p__Gemmatimonadota; c__Gemmatimonadetes; o__Gemmatimonadales; f__Gemmatimonadaceae; g__uncultured
bASV2137	73	0.382453	245.121	-0.535891	0	Peripherals	d__Bacteria; p__NB1-j; c__NB1-j; o__NB1-j; f__NB1-j; g__NB1-j
bASV2138	339	0.446662	2128.5	1.39507	0.172849	Peripherals	d__Bacteria; p__Proteobacteria; c__Alphaproteobacteria; o__Rhizobiales; f__Rhizobiaceae; g__Nitratireductor
bASV2139	353	0.454628	3866.91	1.4967	0.444444	Peripherals	d__Bacteria; p__Acidobacteriota; c__Acidobacteriae; o__Bryobacterales; f__Bryobacteraceae; g__Bryobacter
bASV2141	94	0.39359	334.723	-0.383447	0.209497	Peripherals	d__Bacteria; p__Actinobacteriota; c__Thermoleophilia; o__Gaiellales; f__uncultured; g__uncultured
bASV2146	1	0.232698	0	-1.10947	0	Peripherals	d__Bacteria; p__Actinobacteriota; c__Thermoleophilia; o__Gaiellales; f__Gaiellaceae; g__Gaiella; s__uncultured_Rubrobacterales
bASV2147	24	0.343393	165.414	-0.891594	0	Peripherals	d__Bacteria; p__Bacteroidota; c__Bacteroidia; o__Chitinophagales; f__Chitinophagaceae; g__Parafilimonas; s__uncultured_bacterium
bASV2148	87	0.359322	542.937	-0.346695	0	Peripherals	d__Bacteria; p__Proteobacteria; c__Gammaproteobacteria; o__Burkholderiales; f__SC-I-84; g__SC-I-84
bASV2149	1	0.227596	0	-1.05856	0	Peripherals	d__Bacteria; p__Verrucomicrobiota; c__Verrucomicrobiae; o__Pedosphaerales; f__Pedosphaeraceae; g__ADurb.Bin063-1
bASV2150	221	0.397631	89.7311	0.841812	0	Peripherals	d__Bacteria; p__Acidobacteriota; c__Subgroup_5; o__Subgroup_5; f__Subgroup_5; g__Subgroup_5; s__uncultured_bacterium
bASV2153	377	0.444004	3434.58	1.67092	0.64	Connectors	d__Bacteria; p__Proteobacteria; c__Alphaproteobacteria; o__Rhizobiales; f__Rhizobiaceae
bASV2158	135	0.383619	918.669	0.079039	0.30839	Peripherals	d__Bacteria; p__Acidobacteriota; c__Acidobacteriae; o__Solibacterales; f__Solibacteraceae; g__Candidatus_Solibacter
bASV216	3	0.317916	0	-1.04404	0.022789	Peripherals	d__Bacteria; p__Proteobacteria; c__Gammaproteobacteria; o__Burkholderiales; f__Burkholderiaceae; g__Cupriavidus
bASV2162	33	0.370561	48.9248	-0.826261	0	Peripherals	d__Bacteria; p__Actinobacteriota; c__Acidimicrobiia; o__uncultured; f__uncultured; g__uncultured; s__uncultured_Acidimicrobiia
bASV2164	5	0.340663	0	-1.02952	0	Peripherals	d__Bacteria; p__Myxococcota; c__Myxococcia; o__Myxococcales; f__Myxococcaceae; g__uncultured; s__uncultured_delta
bASV217	217	0.444004	9721.22	0.509441	0	Peripherals	d__Bacteria; p__Bacteroidota; c__Bacteroidia; o__Chitinophagales; f__Chitinophagaceae
bASV2170	7	0.310324	202.942	-1.015	0	Peripherals	d__Bacteria; p__Bacteroidota; c__Bacteroidia; o__Chitinophagales; f__Chitinophagaceae
bASV2171	27	0.323015	948.917	-0.878862	0	Peripherals	d__Bacteria; p__Firmicutes; c__Bacilli; o__Paenibacillales; f__Paenibacillaceae; g__Paenibacillus
bASV2173	69	0.364393	22.4344	-0.506345	0.196006	Peripherals	d__Bacteria; p__Actinobacteriota; c__Actinobacteria; o__Micromonosporales; f__Micromonosporaceae
bASV2175	117	0.377649	682.735	-0.0806111	0.136459	Peripherals	d__Bacteria; p__Actinobacteriota; c__Actinobacteria; o__Propionibacteriales; f__Nocardioidaceae
bASV2177	12	0.299035	0.520658	-1.0119	0	Peripherals	d__Bacteria; p__Acidobacteriota; c__Subgroup_5; o__Subgroup_5; f__Subgroup_5; g__Subgroup_5
bASV2183	11	0.332179	0.14223	-0.985965	0.272189	Peripherals	d__Bacteria; p__Proteobacteria; c__Gammaproteobacteria; o__Burkholderiales; f__SC-I-84; g__SC-I-84; s__beta_proteobacterium
bASV2184	416	0.463095	5516.79	1.95403	0	Peripherals	d__Bacteria; p__Proteobacteria; c__Alphaproteobacteria; o__Rhizobiales; f__Xanthobacteraceae; g__uncultured
bASV2186	56	0.339744	13.2298	-0.621648	0	Peripherals	d__Bacteria; p__Proteobacteria; c__Gammaproteobacteria; o__Gammaproteobacteria_Incertae_Sedis; f__Unknown_Family; g__Acidibacter; s__uncultured_gamma
bASV2189	92	0.367451	321.394	-0.302347	0.466701	Peripherals	d__Bacteria; p__Myxococcota; c__Polyangia; o__Haliangiales; f__Haliangiaceae; g__Haliangium; s__uncultured_bacterium
bASV219	48	0.373378	43.7035	-0.717372	0	Peripherals	d__Bacteria; p__Nitrospirota; c__Nitrospiria; o__Nitrospirales; f__Nitrospiraceae; g__Nitrospira
bASV2195	135	0.356397	7.74028	0.079039	0.191065	Peripherals	d__Bacteria; p__Acidobacteriota; c__Acidobacteriae; o__Acidobacteriales; f__Acidobacteriaceae_(Subgroup_1)
bASV2197	1	0.272089	0	-1.10947	0	Peripherals	d__Bacteria; p__Bacteroidota; c__Bacteroidia; o__Sphingobacteriales; f__AKYH767; g__AKYH767
bASV2199	27	0.342459	89.8296	-0.878862	0.449072	Peripherals	d__Bacteria; p__Actinobacteriota; c__Actinobacteria; o__Frankiales; f__Acidothermaceae; g__Acidothermus; s__uncultured_bacterium
bASV220	263	0.428876	16903.1	1.21433	0.167429	Peripherals	d__Bacteria; p__Proteobacteria; c__Alphaproteobacteria; o__Rhizobiales; f__Methyloligellaceae; g__uncultured; s__metagenome
bASV2202	11	0.304138	101.713	-0.985965	0.197531	Peripherals	d__Bacteria; p__Actinobacteriota; c__Acidimicrobiia; o__Microtrichales; f__Ilumatobacteraceae; g__Ilumatobacter; s__uncultured_bacterium
bASV2203	217	0.412451	616.377	0.509441	0	Peripherals	d__Bacteria; p__Actinobacteriota; c__Thermoleophilia; o__Solirubrobacterales; f__Solirubrobacteraceae; g__Solirubrobacter
bASV2205	18	0.341703	2046.8	-0.93515	0	Peripherals	d__Bacteria; p__Actinobacteriota; c__Acidimicrobiia; o__Microtrichales; f__uncultured; g__uncultured
bASV2207	48	0.372963	0.912501	-0.717372	0	Peripherals	d__Bacteria; p__Acidobacteriota; c__Subgroup_25; o__Subgroup_25; f__Subgroup_25; g__Subgroup_25
bASV2209	29	0.36132	25.0689	-0.855298	0	Peripherals	d__Bacteria; p__Actinobacteriota; c__Acidimicrobiia; o__Microtrichales; f__Iamiaceae; g__Iamia; s__uncultured_Acidimicrobiales
bASV221	9	0.317816	675.716	-1.03851	0	Peripherals	d__Bacteria; p__Proteobacteria; c__Gammaproteobacteria; o__Burkholderiales; f__Burkholderiaceae; g__Burkholderia-Caballeronia-Paraburkholderia
bASV2210	29	0.365584	43.8956	-0.855298	0.372042	Peripherals	d__Bacteria; p__Gemmatimonadota; c__Gemmatimonadetes; o__Gemmatimonadales; f__Gemmatimonadaceae; g__Gemmatimonas
bASV2211	119	0.373724	2812.57	-0.0628722	0	Peripherals	d__Bacteria; p__Bacteroidota; c__Bacteroidia; o__Sphingobacteriales; f__AKYH767; g__AKYH767; s__metagenome
bASV2217	36	0.346644	709.545	-0.799037	0.492695	Peripherals	d__Bacteria; p__Proteobacteria; c__Alphaproteobacteria; o__Rhizobiales; f__Hyphomicrobiaceae; g__Hyphomicrobium
bASV2218	269	0.41279	2934.7	0.886923	0.277778	Peripherals	d__Bacteria; p__Actinobacteriota; c__Thermoleophilia; o__Solirubrobacterales; f__67-14; g__67-14
bASV222	232	0.428055	11127.2	0.939376	0.140037	Peripherals	d__Bacteria; p__Actinobacteriota; c__Thermoleophilia; o__Gaiellales; f__uncultured; g__uncultured
bASV2220	40	0.384351	1.42163	-0.775446	0	Peripherals	d__Bacteria; p__RCP2-54; c__RCP2-54; o__RCP2-54; f__RCP2-54; g__RCP2-54; s__uncultured_bacterium
bASV2225	1	1	0	0	0	Peripherals	d__Bacteria; p__Proteobacteria; c__Gammaproteobacteria; o__Burkholderiales; f__Comamonadaceae
bASV2227	190	0.427782	752.58	0.313442	0.455102	Peripherals	d__Bacteria; p__Chloroflexi; c__Chloroflexia; o__Chloroflexales; f__Roseiflexaceae
bASV2229	6	0.325101	0	-1.06512	0.110727	Peripherals	d__Bacteria; p__Bdellovibrionota; c__Oligoflexia; o__0319-6G20; f__0319-6G20; g__0319-6G20
bASV223	206	0.434708	6051.07	0.70877	0.00454543	Peripherals	d__Bacteria; p__Proteobacteria; c__Alphaproteobacteria; o__Reyranellales; f__Reyranellaceae; g__Reyranella
bASV2230	1	0.281049	0	-1.05856	0	Peripherals	d__Bacteria; p__Proteobacteria; c__Alphaproteobacteria; o__Rhizobiales; f__Xanthobacteraceae
bASV2231	1	0.283662	0	-1.10947	0.187574	Peripherals	d__Bacteria; p__Proteobacteria; c__Gammaproteobacteria; o__Xanthomonadales; f__Rhodanobacteraceae
bASV2236	233	0.418885	6267.72	0.62559	0.46281	Peripherals	d__Bacteria; p__Chloroflexi; c__TK10; o__TK10; f__TK10; g__TK10
bASV2239	221	0.380215	89.1602	0.841812	0	Peripherals	d__Bacteria; p__Actinobacteriota; c__Thermoleophilia; o__Gaiellales; f__uncultured; g__uncultured
bASV224	102	0.380143	277.072	-0.213653	0.291883	Peripherals	d__Bacteria; p__Verrucomicrobiota; c__Verrucomicrobiae; o__Pedosphaerales; f__Pedosphaeraceae; g__ADurb.Bin063-1
bASV2241	256	0.402237	169.199	1.15224	0	Peripherals	d__Bacteria; p__Acidobacteriota; c__Acidobacteriae; o__Solibacterales; f__Solibacteraceae; g__Candidatus_Solibacter; s__uncultured_Acidobacteriaceae
bASV2244	79	0.396847	21.8353	-0.492336	0	Peripherals	d__Bacteria; p__Chloroflexi; c__TK10; o__TK10; f__TK10; g__TK10; s__uncultured_bacterium
bASV225	390	0.471884	4458.68	2.34075	0.026427	Peripherals	d__Bacteria; p__Proteobacteria; c__Alphaproteobacteria; o__Rhizobiales; f__Xanthobacteraceae; g__Bradyrhizobium
bASV2250	6	0.332179	2303.59	-1.02226	0	Peripherals	d__Bacteria; p__Firmicutes; c__Bacilli; o__Bacillales; f__Bacillaceae; g__Terribacillus; s__Terribacillus_goriensis
bASV2255	119	0.405967	700.617	-0.201965	0	Peripherals	d__Bacteria; p__Proteobacteria; c__Alphaproteobacteria; o__Rhizobiales; f__Xanthobacteraceae; g__uncultured
bASV2259	4	0.294058	0.331072	-1.08286	0	Peripherals	d__Bacteria; p__Proteobacteria; c__Alphaproteobacteria; o__Rhizobiales; f__Rhizobiales_Incertae_Sedis; g__uncultured; s__uncultured_bacterium
bASV2260	9	0.354453	9.4764	-1.00048	0	Peripherals	d__Bacteria; p__Desulfobacterota; c__uncultured; o__uncultured; f__uncultured; g__uncultured
bASV2261	295	0.41845	1897.11	1.07566	0.0907029	Peripherals	d__Bacteria; p__Actinobacteriota; c__Actinobacteria; o__Propionibacteriales; f__Nocardioidaceae; g__Nocardioides
bASV2262	157	0.397317	115.273	0.0738863	0	Peripherals	d__Bacteria; p__Desulfobacterota; c__Desulfuromonadia; o__Desulfuromonadia; f__Desulfuromonadaceae; g__Desulfuromonas; s__uncultured_bacterium
bASV2263	1	0.226623	0	-0.907266	0.062435	Peripherals	d__Bacteria; p__Acidobacteriota; c__Blastocatellia; o__11-24; f__11-24; g__11-24; s__uncultured_bacterium
bASV2269	250	0.382018	153.158	1.09903	0	Peripherals	d__Bacteria; p__Acidobacteriota; c__Acidobacteriae; o__Subgroup_2; f__Subgroup_2; g__Subgroup_2; s__uncultured_bacterium
bASV2270	107	0.39122	522.705	-0.289076	0	Peripherals	d__Bacteria; p__MBNT15; c__MBNT15; o__MBNT15; f__MBNT15; g__MBNT15
bASV2271	208	0.41035	944.183	0.444108	0.143457	Peripherals	d__Bacteria; p__Proteobacteria; c__Gammaproteobacteria; o__Burkholderiales; f__Nitrosomonadaceae; g__mle1-7
bASV2272	47	0.361061	457.415	-0.701473	0	Peripherals	d__Bacteria; p__Firmicutes; c__Bacilli; o__Paenibacillales; f__Paenibacillaceae; g__Paenibacillus; s__Paenibacillus_glycanilyticus
bASV2275	46	0.351606	8.86936	-0.710342	0	Peripherals	d__Bacteria; p__Entotheonellaeota; c__Entotheonellia; o__Entotheonellales; f__Entotheonellaceae; g__Entotheonellaceae; s__uncultured_bacterium
bASV2276	323	0.447257	3382.32	1.27892	0.153837	Peripherals	d__Bacteria; p__Proteobacteria; c__Alphaproteobacteria; o__Rhizobiales; f__Beijerinckiaceae; g__Chelatococcus
bASV2277	19	0.345632	6.61511	-0.927891	0	Peripherals	d__Bacteria; p__Actinobacteriota; c__Acidimicrobiia; o__Microtrichales; f__Ilumatobacteraceae; g__uncultured; s__metagenome
bASV2278	17	0.341703	6.96533	-0.967556	0.5	Peripherals	d__Bacteria; p__Planctomycetota; c__vadinHA49; o__vadinHA49; f__vadinHA49; g__vadinHA49; s__metagenome
bASV228	18	0.341009	34.119	-0.958687	0	Peripherals	d__Bacteria; p__Acidobacteriota; c__Acidobacteriae; o__Subgroup_2; f__Subgroup_2; g__Subgroup_2; s__uncultured_Acidobacteria
bASV2282	105	0.39221	39.8198	-0.303595	0	Peripherals	d__Bacteria; p__Proteobacteria; c__Alphaproteobacteria; o__Rhizobiales; f__Rhizobiaceae; g__Mesorhizobium
bASV2285	1	0.277105	0	-1.05856	0.46875	Peripherals	d__Bacteria; p__Actinobacteriota; c__Thermoleophilia; o__uncultured; f__uncultured; g__uncultured; s__uncultured_bacterium
bASV229	140	0.419147	2236.69	0.123386	0.0229854	Peripherals	d__Bacteria; p__Proteobacteria; c__Alphaproteobacteria; o__Rhizobiales; f__Xanthobacteraceae; g__Rhodoplanes
bASV2292	159	0.3834	193.861	0.291906	0.234481	Peripherals	d__Bacteria; p__Actinobacteriota; c__Thermoleophilia; o__Gaiellales; f__uncultured; g__uncultured
bASV2294	33	0.329139	2301.64	-0.825645	0	Peripherals	d__Bacteria; p__Desulfobacterota; c__uncultured; o__uncultured; f__uncultured; g__uncultured
bASV2296	49	0.325785	47.3749	-0.683734	0.158099	Peripherals	d__Bacteria; p__Entotheonellaeota; c__Entotheonellia; o__Entotheonellales; f__Entotheonellaceae; g__Entotheonellaceae; s__uncultured_bacterium
bASV23	516	0.500621	15827.5	2.67996	0.255	Module hubs	d__Bacteria; p__Proteobacteria; c__Alphaproteobacteria; o__Sphingomonadales; f__Sphingomonadaceae; g__Sphingomonas
bASV230	91	0.394438	827.686	-0.405224	0.277778	Peripherals	d__Bacteria; p__Proteobacteria; c__Alphaproteobacteria; o__Dongiales; f__Dongiaceae; g__Dongia
bASV2300	170	0.380215	123.098	0.38947	0.0131573	Peripherals	d__Bacteria
bASV2302	10	0.3293	5.17776	-1.02964	0	Peripherals	d__Bacteria; p__Firmicutes; c__Bacilli; o__Paenibacillales; f__Paenibacillaceae; g__Paenibacillus; s__Paenibacillus_pocheonensis
bASV231	221	0.386268	198.114	0.841812	0.0673337	Peripherals	d__Bacteria; p__Proteobacteria; c__Alphaproteobacteria; o__Rhizobiales; f__Xanthobacteraceae; g__uncultured
bASV2312	7	0.298017	0.0985169	-1.05625	0	Peripherals	d__Bacteria; p__Firmicutes; c__Bacilli; o__Paenibacillales; f__Paenibacillaceae; g__Paenibacillus
bASV2313	73	0.375606	312.279	-0.470867	0	Peripherals	d__Bacteria; p__MBNT15; c__MBNT15; o__MBNT15; f__MBNT15; g__MBNT15; s__uncultured_bacterium
bASV2315	25	0.374698	12.5327	-0.884335	0.551111	Peripherals	d__Bacteria; p__Proteobacteria; c__Gammaproteobacteria; o__Burkholderiales; f__Comamonadaceae; g__Ideonella; s__uncultured_bacterium
bASV2316	129	0.377154	4065.38	0.0258223	0.408163	Peripherals	d__Bacteria; p__Proteobacteria; c__Alphaproteobacteria; o__Rhizobiales; f__Rhizobiales_Incertae_Sedis; g__Nordella; s__uncultured_bacterium
bASV2317	140	0.381367	1383.59	0.123386	0	Peripherals	d__Bacteria; p__Actinobacteriota; c__Actinobacteria; o__Kineosporiales; f__Kineosporiaceae
bASV232	1	1	0	0	0	Peripherals	d__Bacteria; p__Proteobacteria; c__Gammaproteobacteria; o__Enterobacterales; f__Enterobacteriaceae
bASV2324	97	0.385086	74.1396	-0.361669	0.0823217	Peripherals	d__Bacteria; p__Actinobacteriota; c__Thermoleophilia; o__Solirubrobacterales; f__Solirubrobacteraceae; g__Conexibacter
bASV2327	51	0.339629	181.838	-0.665995	0.182785	Peripherals	d__Bacteria; p__Acidobacteriota; c__Acidobacteriae; o__Acidobacteriae; f__Acidobacteriae; g__Paludibaculum; s__metagenome
bASV2328	303	0.428967	1002.56	1.13374	0	Peripherals	d__Bacteria; p__Proteobacteria; c__Gammaproteobacteria; o__Burkholderiales; f__TRA3-20; g__TRA3-20
bASV233	253	0.431633	1341.47	1.12563	0	Peripherals	d__Bacteria; p__Proteobacteria; c__Alphaproteobacteria; o__Rhizobiales; f__Xanthobacteraceae; g__uncultured; s__uncultured_forest
bASV2332	3	0.29705	0	-1.09173	0	Peripherals	d__Bacteria; p__Acidobacteriota; c__Acidobacteriae; o__Subgroup_2; f__Subgroup_2; g__Subgroup_2; s__uncultured_bacterium
bASV2333	59	0.34935	1329.09	-0.595039	0.01702	Peripherals	d__Bacteria; p__Actinobacteriota; c__Actinobacteria; o__Frankiales; f__Frankiales; g__Frankiales; s__uncultured_bacterium
bASV2334	5	0.31948	0.0166459	-1.02952	0.217198	Peripherals	d__Bacteria; p__Chloroflexi; c__Dehalococcoidia; o__S085; f__S085; g__S085
bASV2335	141	0.376449	742.76	0.132256	0.0377219	Peripherals	d__Bacteria; p__Acidobacteriota; c__Acidobacteriae; o__Acidobacteriales; f__uncultured; g__uncultured
bASV2338	177	0.387308	29.5255	0.451556	0	Peripherals	d__Bacteria; p__Proteobacteria; c__Alphaproteobacteria; o__Rhizobiales; f__Xanthobacteraceae; g__uncultured
bASV2339	2	0.310707	0.520727	-1.0513	0.299388	Peripherals	d__Bacteria; p__Actinobacteriota; c__Thermoleophilia; o__Solirubrobacterales; f__Solirubrobacteraceae; g__JCM_18997; s__uncultured_bacterium
bASV234	110	0.385972	6237.86	-0.142697	0	Peripherals	d__Bacteria; p__Firmicutes; c__Bacilli; o__Bacillales; f__Bacillaceae; g__Bacillus
bASV2342	114	0.365252	89.9117	-0.107219	0	Peripherals	d__Bacteria; p__Acidobacteriota; c__Acidobacteriae; o__Solibacterales; f__Solibacteraceae; g__Candidatus_Solibacter
bASV2344	37	0.362361	257.314	-0.797224	0.0946265	Peripherals	d__Bacteria; p__Proteobacteria; c__Alphaproteobacteria; o__Sphingomonadales; f__Sphingomonadaceae; g__Sphingomonas; s__Sphingomonas_oryziterrae
bASV2346	142	0.404499	169.761	-0.0350025	0.424884	Peripherals	d__Bacteria; p__Myxococcota; c__Polyangia; o__Haliangiales; f__Haliangiaceae; g__Haliangium; s__uncultured_Nannocystineae
bASV2347	79	0.365318	76.2259	-0.41765	0	Peripherals	d__Bacteria; p__Proteobacteria; c__Alphaproteobacteria; o__Rhizobiales; f__Xanthobacteraceae
bASV2348	25	0.337523	96.0999	-0.896601	0.426036	Peripherals	d__Bacteria; p__Proteobacteria; c__Alphaproteobacteria; o__Reyranellales; f__Reyranellaceae; g__Reyranella
bASV2349	182	0.400159	182	0.255368	0	Peripherals	d__Bacteria; p__Actinobacteriota; c__Actinobacteria; o__Micromonosporales; f__Micromonosporaceae; g__Luedemannella; s__uncultured_bacterium
bASV2350	184	0.382308	106.821	0.513642	0.277778	Peripherals	d__Bacteria; p__Actinobacteriota; c__Thermoleophilia; o__Solirubrobacterales; f__Solirubrobacteraceae; g__Conexibacter; s__uncultured_Conexibacteraceae
bASV2357	60	0.357092	589.234	-0.58617	0.105916	Peripherals	d__Bacteria; p__Proteobacteria; c__Alphaproteobacteria; o__Rhizobiales; f__Hyphomicrobiaceae; g__Hyphomicrobium
bASV2359	3	0.331632	1.37815	-1.04404	0	Peripherals	d__Bacteria; p__Proteobacteria; c__Gammaproteobacteria; o__Steroidobacterales; f__Steroidobacteraceae; g__uncultured
bASV236	34	0.354266	218.897	-0.816775	0.00657888	Peripherals	d__Bacteria; p__Proteobacteria; c__Alphaproteobacteria; o__Rhizobiales; f__Xanthobacteraceae; g__uncultured
bASV2362	298	0.435742	680.514	1.52476	0	Peripherals	d__Bacteria; p__Actinobacteriota; c__Acidimicrobiia; o__uncultured; f__uncultured; g__uncultured; s__metagenome
bASV2364	28	0.340605	2102.06	-0.869992	0	Peripherals	d__Bacteria; p__Actinobacteriota; c__Acidimicrobiia; o__Microtrichales; f__Microtrichales; g__Microtrichales; s__metagenome
bASV2367	278	0.417236	338.24	1.34737	0.0774361	Peripherals	d__Bacteria; p__Chloroflexi; c__Ktedonobacteria; o__Ktedonobacterales; f__Ktedonobacteraceae; g__1921-3
bASV237	323	0.462669	3405.06	1.7465	0	Peripherals	d__Bacteria; p__Acidobacteriota; c__Acidobacteriae; o__Solibacterales; f__Solibacteraceae; g__Candidatus_Solibacter; s__uncultured_soil
bASV2371	55	0.357346	5.35922	-0.630517	0.105362	Peripherals	d__Bacteria; p__Myxococcota; c__Polyangia; o__Haliangiales; f__Haliangiaceae; g__Haliangium
bASV2374	70	0.361775	80.2766	-0.497475	0.152778	Peripherals	d__Bacteria; p__Proteobacteria; c__Alphaproteobacteria; o__Rhizobiales; f__Hyphomicrobiaceae; g__Hyphomicrobium
bASV2378	7	0.314786	0.321084	-1.05625	0.289028	Peripherals	d__Bacteria; p__Acidobacteriota; c__Acidobacteriae; o__Solibacterales; f__Solibacteraceae; g__Candidatus_Solibacter
bASV238	145	0.412282	214.984	0.167734	0	Peripherals	d__Bacteria; p__Proteobacteria; c__Gammaproteobacteria; o__Burkholderiales; f__Burkholderiaceae; g__Burkholderia-Caballeronia-Paraburkholderia
bASV2381	11	0.30594	0.137311	-1.02077	0	Peripherals	d__Bacteria; p__Acidobacteriota; c__Acidobacteriae; o__Acidobacteriales
bASV2386	39	0.35383	10.369	-0.772428	0.0172401	Peripherals	d__Bacteria; p__Armatimonadota; c__Fimbriimonadia; o__Fimbriimonadales; f__Fimbriimonadaceae; g__Fimbriimonadaceae
bASV2388	3	0.290285	0	-1.09173	0.498047	Peripherals	d__Bacteria; p__Firmicutes; c__Bacilli; o__Paenibacillales; f__Paenibacillaceae; g__Paenibacillus; s__Paenibacillus_qinlingensis
bASV239	213	0.416977	8521.23	0.770856	0.0532933	Peripherals	d__Bacteria; p__Proteobacteria; c__Alphaproteobacteria; o__Rhizobiales; f__Xanthobacteraceae; g__uncultured
bASV2395	254	0.423198	685.27	1.1345	0.195098	Peripherals	d__Bacteria; p__Proteobacteria; c__Alphaproteobacteria; o__Azospirillales; f__Inquilinaceae; g__Inquilinus; s__uncultured_Alphaproteobacteria
bASV24	3	0.201945	0	-0.504025	0	Peripherals	d__Bacteria; p__Proteobacteria; c__Gammaproteobacteria; o__Enterobacterales
bASV240	204	0.436308	3560.8	0.415071	0.283109	Peripherals	d__Bacteria; p__Actinobacteriota; c__Actinobacteria; o__Propionibacteriales; f__Nocardioidaceae; g__Nocardioides
bASV2401	13	0.350017	0.50721	-0.971446	0.203898	Peripherals	d__Bacteria; p__Myxococcota; c__Polyangia; o__Polyangiales; f__Polyangiaceae; g__Polyangium; s__uncultured_bacterium
bASV2404	156	0.398024	58.7207	0.066627	0.0763817	Peripherals	d__Bacteria; p__Gemmatimonadota; c__S0134_terrestrial_group; o__S0134_terrestrial_group; f__S0134_terrestrial_group; g__S0134_terrestrial_group; s__uncultured_Gemmatimonadales
bASV2405	58	0.369609	146.036	-0.64478	0	Peripherals	d__Bacteria; p__Bacteroidota; c__Bacteroidia; o__Chitinophagales; f__Chitinophagaceae; g__uncultured; s__uncultured_microorganism
bASV2408	7	0.308092	3.99171	-1.015	0	Peripherals	d__Bacteria; p__Proteobacteria; c__Gammaproteobacteria; o__R7C24; f__R7C24; g__R7C24
bASV2414	21	0.364064	4.91352	-0.913372	0	Peripherals	d__Bacteria; p__Verrucomicrobiota; c__Verrucomicrobiae; o__Pedosphaerales; f__Pedosphaeraceae; g__Pedosphaeraceae
bASV2416	33	0.327586	37.6442	-0.825645	0	Peripherals	d__Bacteria; p__MBNT15; c__MBNT15; o__MBNT15; f__MBNT15; g__MBNT15; s__uncultured_bacterium
bASV2417	61	0.352776	1344.85	-0.5773	0.018098	Peripherals	d__Bacteria; p__Proteobacteria; c__Alphaproteobacteria; o__Caulobacterales; f__Hyphomonadaceae; g__SWB02; s__uncultured_bacterium
bASV242	381	0.474552	5740.77	2.26092	0.132653	Peripherals	d__Bacteria; p__Proteobacteria; c__Alphaproteobacteria; o__Rhizobiales; f__Beijerinckiaceae; g__Roseiarcus; s__uncultured_bacterium
bASV2420	38	0.378074	131.156	-0.789965	0.168469	Peripherals	d__Bacteria; p__Proteobacteria; c__Alphaproteobacteria; o__Rhizobiales; f__Rhizobiaceae
bASV2425	99	0.367183	8202.23	-0.240261	0.126004	Peripherals	d__Bacteria; p__Actinobacteriota; c__Thermoleophilia; o__Gaiellales; f__Gaiellaceae; g__Gaiella
bASV2427	20	0.337919	0.716227	-0.920631	0.401388	Peripherals	d__Bacteria; p__Actinobacteriota; c__Actinobacteria; o__Pseudonocardiales; f__Pseudonocardiaceae; g__Lechevalieria
bASV2428	305	0.416288	1912.47	1.14826	0.479175	Peripherals	d__Bacteria; p__Proteobacteria; c__Gammaproteobacteria; o__Burkholderiales; f__Nitrosomonadaceae; g__MND1
bASV243	170	0.422932	510.774	0.168257	0	Peripherals	d__Bacteria; p__Proteobacteria; c__Alphaproteobacteria; o__Rhizobiales; f__Rhizobiaceae; g__Shinella
bASV2431	12	0.32984	0.301731	-1.0119	0	Peripherals	d__Bacteria; p__Actinobacteriota; c__Actinobacteria; o__Propionibacteriales; f__Nocardioidaceae; g__Nocardioides; s__Nocardioides_baekrokdamisoli
bASV2435	75	0.359707	19.8375	-0.521373	0.289892	Peripherals	d__Bacteria; p__Verrucomicrobiota; c__Chlamydiae; o__Chlamydiales; f__Parachlamydiaceae; g__Neochlamydia
bASV244	2	1	1	1.1547	0	Peripherals	d__Bacteria; p__Proteobacteria; c__Gammaproteobacteria; o__Xanthomonadales; f__Xanthomonadaceae; g__Pseudoxanthomonas
bASV2444	54	0.371107	18.6483	-0.673817	0	Peripherals	d__Bacteria; p__Bacteroidota; c__Bacteroidia; o__Cytophagales; f__Hymenobacteraceae; g__Adhaeribacter; s__uncultured_soil
bASV2448	65	0.351238	2307.63	-0.541823	0.313343	Peripherals	d__Bacteria; p__Proteobacteria; c__Gammaproteobacteria; o__Burkholderiales; f__SC-I-84; g__SC-I-84
bASV245	38	0.398812	23.2726	-0.789965	0	Peripherals	d__Bacteria; p__Proteobacteria; c__Alphaproteobacteria; o__Rhizobiales; f__Rhizobiaceae; g__Allorhizobium-Neorhizobium-Pararhizobium-Rhizobium
bASV2453	64	0.376801	29.4337	-0.601224	0.498615	Peripherals	d__Bacteria; p__Bacteroidota; c__Bacteroidia; o__Chitinophagales; f__Saprospiraceae; g__uncultured
bASV2454	64	0.349896	398.937	-0.550692	0	Peripherals	d__Bacteria; p__Acidobacteriota; c__Thermoanaerobaculia; o__Thermoanaerobaculales; f__Thermoanaerobaculaceae; g__Subgroup_10
bASV2456	14	0.332673	5.38676	-0.964187	0.0920035	Peripherals	d__Bacteria; p__Myxococcota; c__Polyangia; o__Polyangiales; f__Sandaracinaceae; g__uncultured
bASV2457	174	0.417929	469.68	0.197294	0	Peripherals	d__Bacteria; p__NB1-j; c__NB1-j; o__NB1-j; f__NB1-j; g__NB1-j; s__uncultured_Myxococcales
bASV246	159	0.422134	651.942	0.0884048	0	Peripherals	d__Bacteria; p__Verrucomicrobiota; c__Verrucomicrobiae; o__Pedosphaerales; f__Pedosphaeraceae; g__ADurb.Bin063-1
bASV2461	10	0.308801	14.4074	-0.993224	0.0935232	Peripherals	d__Bacteria; p__Proteobacteria; c__Gammaproteobacteria; o__Burkholderiales; f__Nitrosomonadaceae; g__Ellin6067
bASV247	234	0.420284	1330.01	0.957115	0	Peripherals	d__Bacteria; p__Proteobacteria; c__Gammaproteobacteria; o__Burkholderiales; f__Burkholderiaceae; g__Burkholderia-Caballeronia-Paraburkholderia
bASV2470	3	0.201966	0	-0.504025	0	Peripherals	d__Bacteria; p__Proteobacteria; c__Gammaproteobacteria; o__Enterobacterales; f__Enterobacteriaceae
bASV2473	102	0.367116	1365.03	-0.213653	0	Peripherals	d__Bacteria; p__RCP2-54; c__RCP2-54; o__RCP2-54; f__RCP2-54; g__RCP2-54
bASV2476	57	0.363145	43.6544	-0.652039	0	Peripherals	d__Bacteria; p__Proteobacteria; c__Alphaproteobacteria; o__Rhizobiales; f__Rhizobiales_Incertae_Sedis; g__uncultured; s__uncultured_bacterium
bASV2479	165	0.417842	1530.55	0.13196	0	Peripherals	d__Bacteria; p__Actinobacteriota; c__Actinobacteria; o__Propionibacteriales; f__Nocardioidaceae; g__Nocardioides
bASV2485	148	0.398654	80.3975	0.00855298	0	Peripherals	d__Bacteria; p__Proteobacteria; c__Alphaproteobacteria; o__Sphingomonadales; f__Sphingomonadaceae; g__Ellin6055
bASV2486	18	0.341414	36.0055	-0.93515	0	Peripherals	d__Bacteria; p__Actinobacteriota; c__Actinobacteria; o__Pseudonocardiales; f__Pseudonocardiaceae; g__Pseudonocardia
bASV249	528	0.495449	10412.1	2.76707	0.1848	Module hubs	d__Bacteria; p__Actinobacteriota; c__Actinobacteria; o__Propionibacteriales; f__Nocardioidaceae; g__Nocardioides
bASV2490	6	0.334107	0	-1.02226	0.189275	Peripherals	d__Bacteria; p__Proteobacteria; c__Gammaproteobacteria; o__PLTA13; f__PLTA13; g__PLTA13; s__metagenome
bASV2492	93	0.380143	60.6108	-0.390706	0	Peripherals	d__Bacteria; p__Acidobacteriota; c__Acidobacteriae; o__Elev-16S-1166; f__Elev-16S-1166; g__Elev-16S-1166
bASV2493	303	0.444101	1733.42	1.13374	0	Peripherals	d__Bacteria; p__Proteobacteria; c__Gammaproteobacteria; o__Burkholderiales; f__A21b; g__A21b
bASV2497	90	0.398812	329.269	-0.412484	0	Peripherals	d__Bacteria; p__Actinobacteriota; c__Acidimicrobiia; o__Microtrichales; f__Ilumatobacteraceae; g__uncultured
bASV2499	140	0.386861	103.959	-0.049521	0	Peripherals	d__Bacteria; p__Proteobacteria; c__Alphaproteobacteria; o__Rhodobacterales; f__Rhodobacteraceae; g__Amaricoccus
bASV25	1	0.249628	0	-1.10947	0	Peripherals	d__Bacteria; p__Proteobacteria; c__Gammaproteobacteria; o__Burkholderiales; f__Burkholderiaceae; g__Ralstonia
bASV250	313	0.469245	8847.63	1.20633	0.250117	Peripherals	d__Bacteria; p__Proteobacteria; c__Alphaproteobacteria; o__Rhizobiales; f__Rhizobiaceae; g__Mesorhizobium
bASV2500	23	0.344686	13.3986	-0.914339	0.0272057	Peripherals	d__Bacteria; p__Actinobacteriota; c__Actinobacteria; o__Pseudonocardiales; f__Pseudonocardiaceae; g__Pseudonocardia; s__uncultured_bacterium
bASV2504	156	0.386713	134.035	0.066627	0.444444	Peripherals	d__Bacteria; p__Actinobacteriota; c__Thermoleophilia; o__Solirubrobacterales; f__67-14; g__67-14
bASV251	425	0.484717	5246.23	2.01937	0.359862	Peripherals	d__Bacteria; p__Proteobacteria; c__Alphaproteobacteria; o__Rhizobiales; f__KF-JG30-B3; g__KF-JG30-B3
bASV2512	264	0.405476	476.29	0.850626	0	Peripherals	d__Bacteria; p__Actinobacteriota; c__Actinobacteria; o__Pseudonocardiales; f__Pseudonocardiaceae; g__Pseudonocardia
bASV252	368	0.475224	6993.31	1.60559	0.244898	Peripherals	d__Bacteria; p__Proteobacteria; c__Alphaproteobacteria; o__Rhizobiales; f__Rhizobiaceae
bASV2520	65	0.371999	6.3863	-0.593965	0.0363512	Peripherals	d__Bacteria; p__Actinobacteriota; c__Actinobacteria; o__Propionibacteriales; f__Nocardioidaceae; g__Nocardioides; s__Nocardioides_simplex
bASV2521	102	0.36819	932.471	-0.213653	0.0105538	Peripherals	d__Bacteria; p__Proteobacteria; c__Alphaproteobacteria; o__Micropepsales; f__Micropepsaceae; g__uncultured; s__uncultured_bacterium
bASV2524	20	0.339	712.271	-0.940948	0.137174	Peripherals	d__Bacteria; p__Actinobacteriota; c__Thermoleophilia; o__Solirubrobacterales; f__Solirubrobacteraceae; g__Solirubrobacter
bASV2527	1	0.258172	0	-1.10947	0.5	Peripherals	d__Bacteria; p__Bacteroidota; c__Bacteroidia; o__Chitinophagales; f__Chitinophagaceae; g__Ferruginibacter
bASV2528	61	0.354328	72.5902	-0.5773	0	Peripherals	d__Bacteria; p__Verrucomicrobiota; c__Verrucomicrobiae; o__Pedosphaerales; f__Pedosphaeraceae; g__Pedosphaeraceae; s__uncultured_soil
bASV253	62	0.372687	294.42	-0.568431	0.112182	Peripherals	d__Bacteria; p__Actinobacteriota; c__Thermoleophilia; o__Solirubrobacterales; f__67-14; g__67-14; s__uncultured_Conexibacteraceae
bASV2533	2	0.168465	0	-0.749405	0	Peripherals	d__Bacteria; p__Proteobacteria; c__Gammaproteobacteria
bASV2534	41	0.353954	6.97933	-0.754689	0	Peripherals	d__Bacteria; p__Acidobacteriota; c__Acidobacteriae; o__Bryobacterales; f__Bryobacteraceae; g__Bryobacter
bASV2541	170	0.399921	85.5478	0.168257	0	Peripherals	d__Bacteria; p__Proteobacteria; c__Gammaproteobacteria; o__Burkholderiales; f__Nitrosomonadaceae; g__mle1-7; s__uncultured_beta
bASV2550	95	0.371793	42.3863	-0.376187	0.119808	Peripherals	d__Bacteria; p__Proteobacteria; c__Alphaproteobacteria; o__Dongiales; f__Dongiaceae; g__Dongia
bASV2552	4	0.298592	0	-1.08286	0	Peripherals	d__Bacteria; p__Myxococcota; c__Polyangia; o__Haliangiales; f__Haliangiaceae; g__Haliangium
bASV2553	11	0.308517	26.6698	-0.985965	0	Peripherals	d__Bacteria; p__Bacteroidota; c__Bacteroidia; o__Chitinophagales; f__Chitinophagaceae; g__Aurantisolimonas
bASV2558	47	0.381295	98.6243	-0.724632	0.150791	Peripherals	d__Bacteria; p__Actinobacteriota; c__Acidimicrobiia; o__IMCC26256; f__IMCC26256; g__IMCC26256
bASV2560	171	0.411188	220.926	0.175516	0	Peripherals	d__Bacteria; p__Gemmatimonadota; c__Gemmatimonadetes; o__Gemmatimonadales; f__Gemmatimonadaceae; g__uncultured
bASV2561	7	0.291335	0.171551	-1.05625	0	Peripherals	d__Bacteria; p__Actinobacteriota; c__Actinobacteria; o__Corynebacteriales; f__Nocardiaceae; g__Rhodococcus; s__Rhodococcus_kyotonensis
bASV2563	124	0.386787	760.937	-0.165669	0.429688	Peripherals	d__Bacteria; p__Actinobacteriota; c__Acidimicrobiia; o__Microtrichales; f__Ilumatobacteraceae; g__CL500-29_marine_group; s__metagenome
bASV2568	1	0.236191	0	-0.907266	0.137397	Peripherals	d__Bacteria; p__Verrucomicrobiota; c__Chlamydiae; o__Chlamydiales; f__Parachlamydiaceae; g__Neochlamydia
bASV2569	59	0.373101	814.258	-0.595039	0.485368	Peripherals	d__Bacteria; p__Actinobacteriota; c__Acidimicrobiia; o__Microtrichales; f__Ilumatobacteraceae; g__CL500-29_marine_group; s__metagenome
bASV257	205	0.424447	3184.24	0.42233	0	Peripherals	d__Bacteria; p__Bacteroidota; c__Bacteroidia; o__Chitinophagales; f__Saprospiraceae; g__uncultured
bASV2570	108	0.37428	44.4186	-0.160436	0	Peripherals	d__Bacteria; p__Proteobacteria; c__Alphaproteobacteria; o__Elsterales; f__Elsteraceae; g__uncultured; s__uncultured_bacterium
bASV2576	384	0.452076	2228.93	1.72174	0	Peripherals	d__Bacteria; p__Desulfobacterota; c__uncultured; o__uncultured; f__uncultured; g__uncultured; s__uncultured_bacterium
bASV2577	203	0.378714	41.6219	0.682162	0	Peripherals	d__Bacteria; p__Myxococcota; c__Polyangia; o__Polyangiales; f__Polyangiaceae; g__uncultured; s__metagenome
bASV2580	20	0.317065	56.4743	-0.940948	0	Peripherals	d__Bacteria; p__Acidobacteriota; c__Acidobacteriae; o__Bryobacterales; f__Bryobacteraceae; g__Bryobacter
bASV2582	1	0.270046	0	-1.10947	0	Peripherals	d__Bacteria; p__Desulfobacterota; c__Desulfuromonadia; o__Geobacterales; f__Geobacteraceae; g__Citrifermentans
bASV2585	3	0.303588	8.9931	0	0.12731	Peripherals	d__Bacteria; p__Proteobacteria; c__Alphaproteobacteria; o__uncultured; f__uncultured; g__uncultured; s__Rhodospirillaceae_bacterium
bASV259	46	0.341588	128.513	-0.710342	0	Peripherals	d__Bacteria; p__Proteobacteria; c__Gammaproteobacteria; o__Burkholderiales; f__Burkholderiaceae; g__Burkholderia-Caballeronia-Paraburkholderia
bASV2597	6	0.352344	0	-1.02226	0.0867769	Peripherals	d__Bacteria; p__Bacteroidota; c__Bacteroidia; o__Flavobacteriales; f__NS9_marine_group; g__NS9_marine_group; s__metagenome
bASV26	400	0.491579	21326.6	1.83788	0.329244	Peripherals	d__Bacteria; p__Proteobacteria; c__Alphaproteobacteria; o__Rhizobiales; f__Methyloligellaceae
bASV260	401	0.480668	4837.45	1.84514	0	Peripherals	d__Bacteria; p__Proteobacteria; c__Gammaproteobacteria; o__PLTA13; f__PLTA13; g__PLTA13
bASV2601	1	0.316567	0	-1.05856	0	Peripherals	d__Bacteria; p__Proteobacteria; c__Alphaproteobacteria; o__Caulobacterales; f__Hyphomonadaceae; g__SWB02
bASV2603	1	0.314491	0	-1.05856	0.297207	Peripherals	d__Bacteria; p__Proteobacteria; c__Alphaproteobacteria; o__Rhizobiales; f__Xanthobacteraceae; g__uncultured
bASV2605	292	0.390613	888.287	1.47154	0.0430825	Peripherals	d__Bacteria; p__Acidobacteriota; c__Acidobacteriae; o__Bryobacterales; f__Bryobacteraceae; g__Bryobacter
bASV2608	6	0.328441	0.00821397	-1.02226	0	Peripherals	d__Bacteria; p__Proteobacteria; c__Gammaproteobacteria; o__Burkholderiales; f__Nitrosomonadaceae; g__MND1
bASV261	398	0.477704	13064.2	1.82337	0	Peripherals	d__Bacteria; p__Proteobacteria; c__Alphaproteobacteria; o__Rhizobiales; f__Beijerinckiaceae; g__Microvirga
bASV2614	198	0.378714	32.4077	0.637814	0	Peripherals	d__Bacteria; p__Actinobacteriota; c__Thermoleophilia; o__Gaiellales; f__uncultured; g__uncultured; s__uncultured_bacterium
bASV2617	248	0.423822	504.537	0.734478	0.0313646	Peripherals	d__Bacteria; p__Bacteroidota; c__Bacteroidia; o__Cytophagales; f__Microscillaceae
bASV262	52	0.373309	928.293	-0.688335	0.0145978	Peripherals	d__Bacteria; p__Bacteroidota; c__Bacteroidia; o__Flavobacteriales; f__Flavobacteriaceae; g__Flavobacterium
bASV2621	43	0.350749	126.385	-0.73695	0.132653	Peripherals	d__Bacteria; p__Proteobacteria; c__Alphaproteobacteria; o__Rhizobiales; f__A0839; g__A0839; s__uncultured_bacterium
bASV2625	72	0.381439	9.93679	-0.54315	0.0188662	Peripherals	d__Bacteria; p__Actinobacteriota; c__Acidimicrobiia; o__Microtrichales; f__Ilumatobacteraceae; g__CL500-29_marine_group
bASV2629	2	0.264374	0	-1.1006	0	Peripherals	d__Bacteria; p__Actinobacteriota; c__Thermoleophilia; o__Gaiellales; f__uncultured; g__uncultured; s__uncultured_Conexibacter
bASV263	92	0.396769	6525.76	-0.397965	0.317239	Peripherals	d__Bacteria; p__Actinobacteriota; c__Thermoleophilia; o__Gaiellales
bASV2630	4	0.306498	8.79806	-1.08286	0.0117298	Peripherals	d__Bacteria; p__Proteobacteria; c__Gammaproteobacteria; o__Xanthomonadales; f__Rhodanobacteraceae; g__Rhodanobacter; s__uncultured_Xanthomonadaceae
bASV2632	61	0.351606	217.261	-0.5773	0.345384	Peripherals	d__Bacteria; p__Actinobacteriota; c__Acidimicrobiia; o__IMCC26256; f__IMCC26256; g__IMCC26256; s__metagenome
bASV2633	54	0.34398	61.9403	-0.639386	0.0587695	Peripherals	d__Bacteria; p__Acidobacteriota; c__Acidobacteriae; o__Solibacterales; f__Solibacteraceae; g__Candidatus_Solibacter
bASV2635	1	0.311475	0	-1.05856	0.192334	Peripherals	d__Bacteria; p__Proteobacteria; c__Alphaproteobacteria; o__Rhizobiales; f__Xanthobacteraceae
bASV264	13	0.34398	0.484367	-1.00303	0	Peripherals	d__Bacteria; p__Proteobacteria; c__Gammaproteobacteria; o__Burkholderiales; f__Comamonadaceae; g__Rhizobacter
bASV2642	2	0.312976	0	-1.0513	0.291883	Peripherals	d__Bacteria; p__Myxococcota; c__Myxococcia; o__Myxococcales; f__Myxococcaceae; g__uncultured; s__uncultured_bacterium
bASV2649	180	0.422222	1830.38	0.240849	0	Peripherals	d__Bacteria; p__Chloroflexi; c__Chloroflexia; o__Chloroflexales; f__Chloroflexaceae; g__FFCH7168; s__uncultured_bacterium
bASV2650	125	0.382018	177.217	-0.15841	0.0713306	Peripherals	d__Bacteria; p__Actinobacteriota; c__Coriobacteriia; o__OPB41; f__OPB41; g__OPB41; s__uncultured_soil
bASV266	28	0.352283	64.3685	-0.869992	0.0713306	Peripherals	d__Bacteria; p__Gemmatimonadota; c__Gemmatimonadetes; o__Gemmatimonadales; f__Gemmatimonadaceae; g__uncultured
bASV2661	20	0.357219	0.225137	-0.920631	0	Peripherals	d__Bacteria; p__Proteobacteria; c__Alphaproteobacteria; o__Rhizobiales; f__Xanthobacteraceae; g__uncultured; s__Afipia_sp.
bASV2667	17	0.317265	26.9451	-0.967556	0.171486	Peripherals	d__Bacteria; p__Proteobacteria; c__Gammaproteobacteria; o__Gammaproteobacteria_Incertae_Sedis; f__Unknown_Family; g__Acidibacter; s__uncultured_gamma
bASV2668	178	0.426334	3094.21	0.226331	0	Peripherals	d__Bacteria; p__Proteobacteria; c__Alphaproteobacteria; o__Rhizobiales; f__Beijerinckiaceae; g__Microvirga; s__metagenome
bASV2669	250	0.398181	136.752	1.09903	0.487476	Peripherals	d__Bacteria; p__Chloroflexi; c__Ktedonobacteria; o__Ktedonobacterales; f__Ktedonobacteraceae; g__1921-3; s__uncultured_bacterium
bASV267	109	0.423732	268.565	-0.274558	0.112274	Peripherals	d__Bacteria; p__Dadabacteria; c__Dadabacteriia; o__Dadabacteriales; f__Dadabacteriales; g__Dadabacteriales; s__uncultured_candidate
bASV2671	6	0.297621	1.30012	-1.06512	0.420673	Peripherals	d__Bacteria; p__Proteobacteria; c__Alphaproteobacteria; o__Rhizobiales; f__Rhizobiaceae
bASV2672	117	0.397866	223.231	-0.216484	0	Peripherals	d__Bacteria; p__Actinobacteriota; c__Acidimicrobiia; o__Microtrichales; f__Ilumatobacteraceae; g__uncultured; s__metagenome
bASV2679	233	0.414659	568.508	0.948245	0.187096	Peripherals	d__Bacteria; p__Proteobacteria; c__Alphaproteobacteria; o__Micropepsales; f__Micropepsaceae; g__uncultured; s__uncultured_bacterium
bASV268	1	1	0	0	0	Peripherals	d__Bacteria; p__Proteobacteria; c__Gammaproteobacteria; o__Enterobacterales; f__Enterobacteriaceae; g__Klebsiella
bASV2681	2	0.263475	0	-1.1006	0	Peripherals	d__Bacteria; p__Proteobacteria; c__Gammaproteobacteria; o__Burkholderiales; f__SC-I-84; g__SC-I-84
bASV2686	217	0.425074	114.642	0.509441	0.152778	Peripherals	d__Bacteria; p__Acidobacteriota; c__Acidobacteriae; o__Solibacterales; f__Solibacteraceae; g__Candidatus_Solibacter; s__uncultured_Acidobacteria
bASV269	358	0.462776	2961.06	2.05693	0	Peripherals	d__Bacteria; p__Proteobacteria; c__Alphaproteobacteria; o__Rhizobiales; f__Xanthobacteraceae; g__uncultured
bASV2692	54	0.375326	422.868	-0.639386	0	Peripherals	d__Bacteria; p__Actinobacteriota; c__Thermoleophilia; o__Solirubrobacterales; f__Solirubrobacteraceae; g__Solirubrobacter; s__uncultured_bacterium
bASV2693	74	0.343921	323.115	-0.461997	0.204669	Peripherals	d__Bacteria; p__Actinobacteriota; c__Thermoleophilia; o__Gaiellales; f__Gaiellaceae; g__Gaiella; s__uncultured_actinobacterium
bASV27	34	0.371724	53.0136	-0.819002	0	Peripherals	d__Bacteria; p__Actinobacteriota; c__Actinobacteria; o__Corynebacteriales; f__Mycobacteriaceae; g__Mycobacterium
bASV2701	174	0.392134	92.9735	0.197294	0	Peripherals	d__Bacteria; p__MBNT15; c__MBNT15; o__MBNT15; f__MBNT15; g__MBNT15; s__uncultured_bacterium
bASV2702	1	0.271063	0	-1.05856	0	Peripherals	d__Bacteria; p__Proteobacteria; c__Gammaproteobacteria; o__Burkholderiales; f__SC-I-84; g__SC-I-84
bASV2705	77	0.356271	3.59878	-0.435389	0.0227243	Peripherals	d__Bacteria; p__Proteobacteria; c__Alphaproteobacteria; o__Elsterales; f__uncultured; g__uncultured; s__uncultured_bacterium
bASV271	412	0.48021	13136.7	2.53588	0.332125	Module hubs	d__Bacteria; p__Acidobacteriota; c__Acidobacteriae; o__Acidobacteriales; f__uncultured; g__uncultured
bASV2710	72	0.388953	96.1694	-0.54315	0	Peripherals	d__Bacteria; p__Actinobacteriota; c__Thermoleophilia; o__Solirubrobacterales; f__67-14; g__67-14; s__uncultured_actinobacterium
bASV2714	93	0.379284	1172.82	-0.293478	0.118838	Peripherals	d__Bacteria; p__Proteobacteria; c__Alphaproteobacteria; o__uncultured; f__uncultured; g__uncultured
bASV2716	85	0.374837	5.4799	-0.44878	0	Peripherals	d__Bacteria; p__Chloroflexi; c__JG30-KF-CM66; o__JG30-KF-CM66; f__JG30-KF-CM66; g__JG30-KF-CM66; s__uncultured_bacterium
bASV2718	130	0.403122	79.9956	-0.122114	0	Peripherals	d__Bacteria; p__Proteobacteria; c__Alphaproteobacteria; o__Rhizobiales; f__D05-2; g__D05-2; s__metagenome
bASV272	341	0.436214	3195.19	1.40959	0.00564967	Peripherals	d__Bacteria; p__Proteobacteria; c__Alphaproteobacteria; o__Sphingomonadales; f__Sphingomonadaceae; g__Sphingomonas
bASV273	33	0.355391	404.038	-0.825645	0	Peripherals	d__Bacteria; p__Proteobacteria; c__Alphaproteobacteria; o__Rhizobiales; f__Xanthobacteraceae; g__uncultured
bASV2734	119	0.380718	120.729	-0.201965	0.0834779	Peripherals	d__Bacteria; p__Acidobacteriota; c__Acidobacteriae; o__Subgroup_13; f__Subgroup_13; g__Subgroup_13; s__uncultured_Acidobacteria
bASV274	407	0.486473	7755.59	1.8887	0.112992	Peripherals	d__Bacteria; p__Proteobacteria; c__Gammaproteobacteria; o__Burkholderiales; f__Nitrosomonadaceae; g__mle1-7; s__uncultured_beta
bASV2740	129	0.397395	135.881	-0.129373	0	Peripherals	d__Bacteria; p__Proteobacteria; c__Alphaproteobacteria; o__Reyranellales; f__Reyranellaceae; g__uncultured; s__uncultured_soil
bASV2741	284	0.430342	653.67	0.995811	0	Peripherals	d__Bacteria; p__Myxococcota; c__Polyangia; o__Polyangiales; f__BIrii41; g__BIrii41; s__uncultured_bacterium
bASV2746	3	0.276458	0	-1.09173	0.285236	Peripherals	d__Bacteria; p__Actinobacteriota; c__Acidimicrobiia; o__Microtrichales; f__uncultured; g__uncultured
bASV275	239	0.446563	3052.03	0.669145	0	Peripherals	d__Bacteria; p__Actinobacteriota; c__Acidimicrobiia; o__Microtrichales; f__Ilumatobacteraceae; g__uncultured
bASV2757	82	0.373516	3.94113	-0.470558	0	Peripherals	d__Bacteria; p__Actinobacteriota; c__Actinobacteria; o__Micromonosporales; f__Micromonosporaceae; g__Catellatospora; s__Catellatospora_citrea
bASV2758	1	0.312442	0	-1.05856	0	Peripherals	d__Bacteria; p__Proteobacteria; c__Gammaproteobacteria; o__Xanthomonadales; f__Xanthomonadaceae; g__Thermomonas
bASV2759	160	0.386639	394.543	0.095664	0	Peripherals	d__Bacteria; p__Actinobacteriota; c__Thermoleophilia; o__Gaiellales; f__uncultured; g__uncultured
bASV2765	11	0.357472	0	-0.985965	0.0848437	Peripherals	d__Bacteria; p__Proteobacteria; c__Alphaproteobacteria; o__Rhizobiales; f__Rhizobiaceae
bASV277	415	0.481013	4977.11	1.94677	0.0219753	Peripherals	d__Bacteria; p__Actinobacteriota; c__Thermoleophilia; o__Solirubrobacterales; f__Solirubrobacteraceae; g__Solirubrobacter; s__uncultured_bacterium
bASV2776	258	0.418363	283.919	0.807071	0.114385	Peripherals	d__Bacteria; p__Myxococcota; c__Polyangia; o__Polyangiales; f__BIrii41; g__BIrii41
bASV2777	167	0.376519	81.1529	0.362861	0	Peripherals	d__Bacteria; p__Myxococcota; c__Polyangia; o__Polyangiales; f__Phaselicystidaceae; g__Phaselicystis
bASV2778	158	0.381079	1831.33	0.283036	0	Peripherals	d__Bacteria; p__Acidobacteriota; c__Acidobacteriae; o__Acidobacteriales; f__uncultured; g__uncultured
bASV278	319	0.473771	7178.53	1.24989	0	Peripherals	d__Bacteria; p__Actinobacteriota; c__Acidimicrobiia; o__Microtrichales; f__Ilumatobacteraceae; g__uncultured; s__uncultured_Acidimicrobiaceae
bASV2783	32	0.373863	17.062	-0.83352	0	Peripherals	d__Bacteria; p__MBNT15; c__MBNT15; o__MBNT15; f__MBNT15; g__MBNT15
bASV2789	24	0.345632	1.36302	-0.891594	0	Peripherals	d__Bacteria; p__Firmicutes; c__Clostridia; o__Clostridiales; f__Clostridiaceae; g__Clostridium_sensu_stricto_8
bASV279	433	0.496426	15035.5	2.07744	0.612245	Peripherals	d__Bacteria; p__Desulfobacterota; c__uncultured; o__uncultured; f__uncultured; g__uncultured
bASV2793	76	0.354702	113.697	-0.444259	0	Peripherals	d__Bacteria; p__Actinobacteriota; c__Actinobacteria; o__Propionibacteriales; f__Nocardioidaceae; g__Nocardioides
bASV2794	70	0.375676	9.52713	-0.557669	0	Peripherals	d__Bacteria; p__Proteobacteria; c__Alphaproteobacteria; o__Dongiales; f__Dongiaceae; g__Dongia
bASV2796	34	0.339343	9.08824	-0.816775	0	Peripherals	d__Bacteria; p__Proteobacteria; c__Alphaproteobacteria; o__Rhizobiales; f__A0839; g__A0839; s__uncultured_bacterium
bASV2797	98	0.371518	1073.88	-0.249131	0.007968	Peripherals	d__Bacteria; p__Proteobacteria; c__Alphaproteobacteria; o__Rhizobiales; f__Xanthobacteraceae; g__uncultured; s__uncultured_Methylocystaceae
bASV2798	371	0.467611	4342.87	1.62737	0	Peripherals	d__Bacteria; p__Myxococcota; c__Polyangia; o__Haliangiales; f__Haliangiaceae; g__Haliangium; s__uncultured_bacterium
bASV28	300	0.452584	4806.17	1.5425	0.00754706	Peripherals	d__Bacteria; p__Proteobacteria; c__Alphaproteobacteria; o__Rhizobiales; f__Xanthobacteraceae; g__uncultured
bASV280	214	0.415858	6983.57	0.779726	0.00709211	Peripherals	d__Bacteria; p__Proteobacteria; c__Alphaproteobacteria; o__Rhizobiales; f__Hyphomicrobiaceae; g__Pedomicrobium; s__uncultured_bacterium
bASV2803	197	0.402961	1736.84	0.364256	0.277778	Peripherals	d__Bacteria; p__Bacteroidota; c__Bacteroidia; o__Chitinophagales; f__Chitinophagaceae; g__Puia; s__uncultured_bacterium
bASV2804	16	0.329948	0.0299515	-0.976426	0	Peripherals	d__Bacteria; p__Actinobacteriota; c__Thermoleophilia; o__Gaiellales; f__uncultured; g__uncultured
bASV2806	4	0.7	0.666667	0.330719	0	Peripherals	d__Bacteria; p__Proteobacteria; c__Gammaproteobacteria; o__Burkholderiales; f__Comamonadaceae; g__Hydrogenophaga
bASV2810	5	0.332893	0	-1.02952	0	Peripherals	d__Bacteria; p__Deinococcota; c__Deinococci; o__Deinococcales; f__Trueperaceae; g__Truepera
bASV2814	114	0.37145	178.169	-0.107219	0	Peripherals	d__Bacteria; p__Gemmatimonadota; c__Gemmatimonadetes; o__Gemmatimonadales; f__Gemmatimonadaceae; g__Gemmatimonas; s__uncultured_Gemmatimonadetes
bASV2817	55	0.349592	447.974	-0.630517	0.21491	Peripherals	d__Bacteria; p__Proteobacteria; c__Alphaproteobacteria; o__Rhizobiales; f__Rhizobiaceae
bASV282	332	0.477251	10710.9	1.34426	0	Peripherals	d__Bacteria; p__Acidobacteriota; c__Subgroup_11; o__Subgroup_11; f__Subgroup_11; g__Subgroup_11; s__uncultured_bacterium
bASV2827	1	0.30918	0	-1.10947	0.149628	Peripherals	d__Bacteria; p__Acidobacteriota; c__Thermoanaerobaculia; o__Thermoanaerobaculales; f__Thermoanaerobaculaceae; g__Subgroup_10; s__uncultured_Acidobacteria
bASV283	353	0.455038	3213.53	2.01258	0	Peripherals	d__Bacteria; p__Proteobacteria; c__Alphaproteobacteria; o__Reyranellales; f__Reyranellaceae; g__Reyranella
bASV2831	23	0.313463	16.6446	-0.914339	0	Peripherals	d__Bacteria; p__Proteobacteria; c__Alphaproteobacteria; o__Rhizobiales; f__Rhizobiales_Incertae_Sedis; g__uncultured; s__uncultured_bacterium
bASV2834	203	0.398891	145.711	0.407812	0	Peripherals	d__Bacteria; p__Actinobacteriota; c__Thermoleophilia; o__Solirubrobacterales; f__67-14; g__67-14; s__uncultured_bacterium
bASV2835	2	0.293116	0	-1.0513	0.484429	Peripherals	d__Bacteria; p__Proteobacteria; c__Alphaproteobacteria; o__Rhizobiales; f__A0839; g__A0839; s__uncultured_bacterium
bASV2837	41	0.344156	4.90122	-0.754689	0.0357025	Peripherals	d__Bacteria; p__Bacteroidota; c__Bacteroidia; o__Cytophagales; f__Microscillaceae; g__uncultured
bASV2838	222	0.378429	95.2942	0.850681	0.0111108	Peripherals	d__Bacteria; p__Proteobacteria; c__Alphaproteobacteria; o__Rhizobiales; f__Beijerinckiaceae; g__Methylovirgula; s__uncultured_Alphaproteobacteria
bASV284	89	0.375326	143.201	-0.328956	0.0239009	Peripherals	d__Bacteria; p__Actinobacteriota; c__Actinobacteria; o__Corynebacteriales; f__Mycobacteriaceae; g__Mycobacterium
bASV2840	282	0.435836	525.763	0.981293	0	Peripherals	d__Bacteria; p__Proteobacteria; c__Gammaproteobacteria; o__Burkholderiales; f__Nitrosomonadaceae; g__mle1-7; s__uncultured_beta
bASV285	39	0.363801	290.897	-0.772428	0	Peripherals	d__Bacteria; p__Actinobacteriota; c__Actinobacteria; o__Micromonosporales; f__Micromonosporaceae
bASV2852	3	0.289326	0	-0.987429	0.257404	Peripherals	d__Bacteria; p__Proteobacteria; c__Alphaproteobacteria; o__Rhizobiales; f__Devosiaceae; g__Devosia
bASV2854	6	0.357536	0	-1.02226	0.0632235	Peripherals	d__Bacteria; p__Actinobacteriota; c__Acidimicrobiia; o__Microtrichales; f__Ilumatobacteraceae; g__CL500-29_marine_group; s__metagenome
bASV2855	31	0.354141	4.67468	-0.84078	0	Peripherals	d__Bacteria; p__Proteobacteria; c__Alphaproteobacteria; o__Rhizobiales; f__Rhizobiaceae; g__Mesorhizobium; s__metagenome
bASV286	576	0.505015	13397.9	3.11551	0.1472	Module hubs	d__Bacteria; p__Actinobacteriota; c__Acidimicrobiia; o__Microtrichales; f__Iamiaceae; g__Iamia; s__uncultured_Acidimicrobiales
bASV2862	88	0.401275	1282.88	-0.427002	0	Peripherals	d__Bacteria; p__Desulfobacterota; c__uncultured; o__uncultured; f__uncultured; g__uncultured
bASV2871	128	0.380574	156.326	0.0169529	0.0286678	Peripherals	d__Bacteria; p__Proteobacteria; c__Alphaproteobacteria; o__Caulobacterales; f__Hyphomonadaceae; g__SWB02; s__uncultured_Alphaproteobacteria
bASV2872	15	0.362295	27.3883	-0.956928	0	Peripherals	d__Bacteria; p__Verrucomicrobiota; c__Verrucomicrobiae; o__Pedosphaerales; f__Pedosphaeraceae; g__Ellin517
bASV2879	6	0.344922	4.21252	-1.02226	0	Peripherals	d__Bacteria; p__Bacteroidota; c__Bacteroidia; o__Chitinophagales; f__Chitinophagaceae; g__Flavihumibacter
bASV288	187	0.425074	148.708	0.291664	0	Peripherals	d__Bacteria; p__Proteobacteria; c__Gammaproteobacteria; o__Steroidobacterales; f__Steroidobacteraceae; g__Steroidobacter
bASV2880	2	0.202514	0	-0.667735	0	Peripherals	d__Bacteria; p__Firmicutes; c__Bacilli; o__Paenibacillales; f__Paenibacillaceae; g__Paenibacillus
bASV2887	4	0.301136	2.52408	-1.03678	0.492188	Peripherals	d__Bacteria; p__Bacteroidota; c__Bacteroidia; o__Sphingobacteriales; f__AKYH767; g__AKYH767; s__uncultured_Bacteroidetes
bASV289	10	0.339057	0.135869	-1.02964	0	Peripherals	d__Bacteria; p__Proteobacteria; c__Gammaproteobacteria; o__Burkholderiales; f__Burkholderiaceae; g__Burkholderia-Caballeronia-Paraburkholderia
bASV2895	1	0.226394	0	-0.943539	0	Peripherals	d__Bacteria; p__Firmicutes; c__Bacilli; o__Paenibacillales; f__Paenibacillaceae; g__Paenibacillus; s__Paenibacillus_xylanexedens
bASV2897	3	0.282905	0.230625	-1.09173	0	Peripherals	d__Bacteria; p__Myxococcota; c__Polyangia; o__Polyangiales; f__Polyangiaceae; g__Sorangium
bASV29	104	0.425164	9554.27	-0.310854	0.0203024	Peripherals	d__Bacteria; p__Proteobacteria; c__Alphaproteobacteria; o__Rhizobiales; f__Rhizobiaceae; g__Ensifer
bASV290	252	0.443417	783.172	1.11676	0.144885	Peripherals	d__Bacteria; p__Actinobacteriota; c__Actinobacteria; o__Micrococcales; f__Micrococcaceae
bASV2905	8	0.30918	4054.02	0.37358	0	Peripherals	d__Bacteria; p__Actinobacteriota; c__MB-A2-108; o__MB-A2-108; f__MB-A2-108; g__MB-A2-108; s__uncultured_bacterium
bASV291	274	0.454525	3742.04	0.923219	0	Peripherals	d__Bacteria; p__Proteobacteria; c__Gammaproteobacteria; o__Gammaproteobacteria; f__Gammaproteobacteria; g__Gammaproteobacteria; s__uncultured_bacterium
bASV2911	200	0.395989	563.773	0.386034	0	Peripherals	d__Bacteria; p__Actinobacteriota; c__Actinobacteria; o__Propionibacteriales; f__Propionibacteriaceae; g__uncultured; s__metagenome
bASV2914	1	1	0	0	0.46875	Peripherals	d__Bacteria; p__Proteobacteria; c__Alphaproteobacteria; o__Sphingomonadales; f__Sphingomonadaceae; g__Novosphingobium
bASV2917	212	0.410937	95.2619	0.473145	0	Peripherals	d__Bacteria; p__Acidobacteriota; c__Thermoanaerobaculia; o__Thermoanaerobaculales; f__Thermoanaerobaculaceae; g__Subgroup_10; s__uncultured_soil
bASV2918	142	0.407445	1175.26	-0.0350025	0	Peripherals	d__Bacteria; p__Bacteroidota; c__Bacteroidia; o__Cytophagales; f__Microscillaceae; g__uncultured
bASV2921	22	0.35489	55.1999	-0.906113	0	Peripherals	d__Bacteria; p__Gemmatimonadota; c__S0134_terrestrial_group; o__S0134_terrestrial_group; f__S0134_terrestrial_group; g__S0134_terrestrial_group
bASV2923	8	0.321059	1.12878	-1.00774	0	Peripherals	d__Bacteria; p__Actinobacteriota; c__Acidimicrobiia; o__Microtrichales; f__Ilumatobacteraceae; g__CL500-29_marine_group; s__metagenome
bASV293	229	0.454115	2892.64	0.596553	0	Peripherals	d__Bacteria; p__Proteobacteria; c__Alphaproteobacteria; o__Rhizobiales; f__Beijerinckiaceae; g__Microvirga
bASV2935	73	0.366382	300.767	-0.470867	0.5	Peripherals	d__Bacteria; p__Proteobacteria; c__Alphaproteobacteria; o__Rhizobiales; f__Rhizobiaceae; g__Phyllobacterium
bASV2936	5	0.313707	0	-1.02952	0	Peripherals	d__Bacteria; p__Proteobacteria; c__Gammaproteobacteria; o__Burkholderiales; f__SC-I-84; g__SC-I-84
bASV2939	34	0.349653	2.77775	-0.816775	0.196933	Peripherals	d__Bacteria; p__Chloroflexi; c__Ktedonobacteria; o__Ktedonobacterales; f__JG30-KF-AS9; g__JG30-KF-AS9; s__uncultured_bacterium
bASV294	330	0.471442	5359.33	1.32974	0	Peripherals	d__Bacteria; p__Actinobacteriota; c__Thermoleophilia; o__Gaiellales; f__uncultured; g__uncultured
bASV2944	1	0.292647	0	-1.05856	0.328181	Peripherals	d__Bacteria; p__Proteobacteria; c__Alphaproteobacteria; o__Rhizobiales; f__Rhizobiales_Incertae_Sedis; g__Nordella; s__uncultured_bacterium
bASV2947	338	0.431079	2390.78	1.38781	0.107755	Peripherals	d__Bacteria; p__Actinobacteriota; c__Acidimicrobiia; o__uncultured; f__uncultured; g__uncultured
bASV2949	28	0.34941	1567.78	-0.869992	0	Peripherals	d__Bacteria; p__Bacteroidota; c__Bacteroidia; o__Chitinophagales; f__Chitinophagaceae; g__Puia
bASV295	14	0.323119	1036.64	-0.964187	0	Peripherals	d__Bacteria; p__Bacteroidota; c__Bacteroidia; o__Chitinophagales; f__Chitinophagaceae; g__Niastella
bASV2950	50	0.355579	35.9577	-0.702854	0.236442	Peripherals	d__Bacteria; p__Proteobacteria; c__Alphaproteobacteria; o__Sphingomonadales; f__Sphingomonadaceae; g__Altererythrobacter
bASV2952	286	0.392287	631.239	1.41833	0	Peripherals	d__Bacteria; p__Proteobacteria; c__Alphaproteobacteria; o__Rhizobiales; f__Hyphomicrobiaceae; g__Pedomicrobium; s__uncultured_bacterium
bASV2953	1	0.289243	0	-1.05856	0.00873346	Peripherals	d__Bacteria; p__Actinobacteriota; c__Actinobacteria; o__Propionibacteriales; f__Nocardioidaceae; g__Nocardioides; s__Kribbella_sp.
bASV2955	16	0.332288	44.5179	-0.949669	0.108851	Peripherals	d__Bacteria; p__Bacteroidota; c__Bacteroidia; o__Chitinophagales; f__Chitinophagaceae
bASV2957	207	0.38575	376.922	0.717639	0	Peripherals	d__Bacteria; p__Gemmatimonadota; c__Gemmatimonadetes; o__Gemmatimonadales; f__Gemmatimonadaceae
bASV296	1	0.31162	0	-1.10947	0.416197	Peripherals	d__Bacteria; p__Acidobacteriota; c__Acidobacteriae; o__Acidobacteriales; f__uncultured; g__uncultured
bASV2964	231	0.414403	511.705	0.930506	0	Peripherals	d__Bacteria; p__Acidobacteriota; c__Acidobacteriae
bASV2966	123	0.405885	984.351	-0.172928	0	Peripherals	d__Bacteria; p__Proteobacteria; c__Alphaproteobacteria; o__Rhizobiales; f__Rhizobiales_Incertae_Sedis; g__Nordella; s__uncultured_bacterium
bASV2967	59	0.350688	866.768	-0.595039	0.0525931	Peripherals	d__Bacteria; p__Proteobacteria; c__Alphaproteobacteria; o__Rhizobiales; f__Devosiaceae; g__Devosia
bASV297	216	0.432003	2340.18	0.797465	0	Peripherals	d__Bacteria; p__Proteobacteria; c__Alphaproteobacteria; o__Rhizobiales; f__Hyphomicrobiaceae
bASV2972	302	0.435742	603.218	1.12648	0	Peripherals	d__Bacteria; p__Gemmatimonadota; c__S0134_terrestrial_group; o__S0134_terrestrial_group; f__S0134_terrestrial_group; g__S0134_terrestrial_group; s__uncultured_Gemmatimonadales
bASV2977	1	0.247664	0	-1.10947	0.328371	Peripherals	d__Bacteria; p__MBNT15; c__MBNT15; o__MBNT15; f__MBNT15; g__MBNT15
bASV298	210	0.427329	523.879	0.458627	0	Peripherals	d__Bacteria; p__Proteobacteria; c__Gammaproteobacteria; o__Steroidobacterales; f__Steroidobacteraceae; g__Steroidobacter
bASV2980	119	0.385898	473.747	-0.201965	0	Peripherals	d__Bacteria; p__Acidobacteriota; c__Acidobacteriae; o__Bryobacterales; f__Bryobacteraceae; g__Bryobacter; s__metagenome
bASV2988	85	0.36512	1639.17	-0.364434	0	Peripherals	d__Bacteria; p__Chloroflexi; c__JG30-KF-CM66; o__JG30-KF-CM66; f__JG30-KF-CM66; g__JG30-KF-CM66
bASV299	86	0.402237	70.3278	-0.441521	0	Peripherals	d__Bacteria; p__Proteobacteria; c__Alphaproteobacteria; o__Rhizobiales; f__Rhizobiaceae
bASV2990	200	0.396847	52.2192	0.386034	0.0439964	Peripherals	d__Bacteria; p__Proteobacteria; c__Alphaproteobacteria; o__Rhizobiales; f__Beijerinckiaceae
bASV2991	64	0.34445	120.331	-0.550692	0.0516069	Peripherals	d__Bacteria; p__Proteobacteria; c__Gammaproteobacteria; o__Burkholderiales; f__Nitrosomonadaceae; g__mle1-7; s__uncultured_beta
bASV2992	13	0.32716	0.379387	-1.00303	0.135666	Peripherals	d__Bacteria; p__Proteobacteria; c__Alphaproteobacteria; o__Rhizobiales; f__Rhizobiales_Incertae_Sedis; g__uncultured; s__uncultured_bacterium
bASV3	16	0.252952	18219.4	2.68592	0.363555	Module hubs	d__Bacteria; p__Proteobacteria; c__Gammaproteobacteria; o__Enterobacterales; f__Enterobacteriaceae
bASV300	452	0.489072	13513.6	2.21537	0.197531	Peripherals	d__Bacteria; p__Actinobacteriota; c__Actinobacteria; o__Propionibacteriales; f__Nocardioidaceae; g__Nocardioides; s__Marmoricola_sp.
bASV3004	4	0.294401	0.0344828	-1.08286	0.0729845	Peripherals	d__Bacteria; p__Proteobacteria; c__Gammaproteobacteria; o__Xanthomonadales; f__Rhodanobacteraceae; g__Dokdonella
bASV3006	105	0.404743	1179.13	-0.303595	0	Peripherals	d__Bacteria; p__Proteobacteria; c__Gammaproteobacteria; o__Gammaproteobacteria_Incertae_Sedis; f__Unknown_Family; g__uncultured
bASV3008	88	0.372894	455.401	-0.427002	0	Peripherals	d__Bacteria; p__Proteobacteria; c__Gammaproteobacteria; o__Burkholderiales; f__Rhodocyclaceae
bASV3009	5	0.321674	0	-1.07399	0.241699	Peripherals	d__Bacteria; p__Actinobacteriota; c__Actinobacteria; o__Micromonosporales; f__Micromonosporaceae; g__Micromonospora
bASV3016	110	0.36565	318.829	-0.142697	0	Peripherals	d__Bacteria; p__Proteobacteria; c__Gammaproteobacteria; o__Burkholderiales; f__SC-I-84; g__SC-I-84
bASV302	8	0.327906	2014.09	-1.00774	0.022469	Peripherals	d__Bacteria; p__Actinobacteriota; c__Actinobacteria; o__Micrococcales; f__Intrasporangiaceae; g__Terrabacter
bASV3022	385	0.473771	4958.46	1.729	0.0550018	Peripherals	d__Bacteria; p__Proteobacteria; c__Alphaproteobacteria; o__Rhizobiales; f__Beijerinckiaceae; g__Microvirga
bASV3024	1	0.244269	0	-1.05856	0.246677	Peripherals	d__Bacteria; p__Actinobacteriota; c__Actinobacteria; o__Frankiales; f__Frankiaceae; g__Jatrophihabitans
bASV303	216	0.436971	541.641	0.502182	0	Peripherals	d__Bacteria; p__Proteobacteria; c__Gammaproteobacteria; o__Burkholderiales; f__Nitrosomonadaceae; g__Ellin6067
bASV304	125	0.405558	2543.75	-0.00965547	0	Peripherals	d__Bacteria; p__Actinobacteriota; c__Acidimicrobiia; o__IMCC26256; f__IMCC26256; g__IMCC26256; s__uncultured_Ferrimicrobium
bASV3042	146	0.372411	68.0242	0.176603	0	Peripherals	d__Bacteria; p__Acidobacteriota; c__Acidobacteriae; o__Solibacterales; f__Solibacteraceae; g__Candidatus_Solibacter
bASV3046	95	0.366983	348.146	-0.275739	0	Peripherals	d__Bacteria; p__Proteobacteria; c__Alphaproteobacteria; o__Elsterales; f__uncultured; g__uncultured; s__uncultured_bacterium
bASV305	190	0.390008	249.511	0.566859	0.299431	Peripherals	d__Bacteria; p__Proteobacteria; c__Alphaproteobacteria; o__Rhizobiales; f__Xanthobacteraceae; g__uncultured
bASV3055	2	0.211444	13.0982	-0.724288	0	Peripherals	d__Bacteria; p__Proteobacteria; c__Alphaproteobacteria; o__Elsterales; f__uncultured; g__uncultured
bASV3056	71	0.358938	110.999	-0.488606	0.0831758	Peripherals	d__Bacteria; p__Proteobacteria; c__Alphaproteobacteria; o__uncultured; f__uncultured; g__uncultured
bASV3057	2	0.299079	0	-1.0513	0.51036	Peripherals	d__Bacteria; p__Proteobacteria; c__Alphaproteobacteria
bASV3059	56	0.386342	39.5583	-0.659298	0	Peripherals	d__Bacteria; p__Bacteroidota; c__Bacteroidia; o__Sphingobacteriales; f__AKYH767; g__AKYH767; s__uncultured_bacterium
bASV3063	22	0.336733	0.78213	-0.923209	0.0210502	Peripherals	d__Bacteria; p__Proteobacteria; c__Gammaproteobacteria; o__CCD24; f__CCD24; g__CCD24
bASV3065	8	0.323378	0.0782589	-1.00774	0	Peripherals	d__Bacteria; p__Myxococcota; c__Myxococcia; o__Myxococcales; f__Myxococcaceae; g__KD3-10; s__uncultured_bacterium
bASV3067	47	0.34124	2093.4	-0.724632	0.132653	Peripherals	d__Bacteria; p__Desulfobacterota; c__Desulfuromonadia; o__Geobacterales; f__Geobacteraceae; g__Citrifermentans
bASV307	31	0.380359	1.58078	-0.84078	0.0369262	Peripherals	d__Bacteria; p__Actinobacteriota; c__Actinobacteria; o__Propionibacteriales; f__Nocardioidaceae; g__Nocardioides
bASV3070	63	0.377436	9.73208	-0.608484	0	Peripherals	d__Bacteria; p__Proteobacteria; c__Alphaproteobacteria; o__Sphingomonadales; f__Sphingomonadaceae; g__uncultured
bASV3073	1	1	0	0	0	Peripherals	d__Bacteria; p__Proteobacteria; c__Gammaproteobacteria; o__Xanthomonadales; f__Rhodanobacteraceae; g__Dokdonella; s__uncultured_Dokdonella
bASV3074	4	0.274163	1.70758	-1.08286	0.386757	Peripherals	d__Bacteria; p__Proteobacteria; c__Alphaproteobacteria; o__Rhizobiales; f__Beijerinckiaceae; g__Neo-b11; s__uncultured_bacterium
bASV308	5	0.33076	3.34603	-1.02952	0	Peripherals	d__Bacteria; p__Proteobacteria; c__Alphaproteobacteria; o__Rhizobiales; f__Rhizobiales_Incertae_Sedis; g__Nordella
bASV3089	167	0.415343	137.117	0.146479	0	Peripherals	d__Bacteria; p__Verrucomicrobiota; c__Verrucomicrobiae; o__Pedosphaerales; f__Pedosphaeraceae; g__Pedosphaeraceae; s__uncultured_bacterium
bASV309	56	0.388353	466.855	-0.659298	0.00877176	Peripherals	d__Bacteria; p__Proteobacteria; c__Alphaproteobacteria; o__Rhizobiales; f__Xanthobacteraceae; g__Rhodoplanes; s__uncultured_bacterium
bASV310	398	0.474441	16362.3	2.4117	0	Peripherals	d__Bacteria; p__Proteobacteria; c__Alphaproteobacteria; o__Rhizobiales; f__Xanthobacteraceae; g__uncultured
bASV3106	2	0.583333	0	-0.992157	0.0242388	Peripherals	d__Bacteria; p__Bacteroidota; c__Bacteroidia; o__Flavobacteriales; f__Weeksellaceae; g__Empedobacter; s__Empedobacter_brevis
bASV311	2	0.274387	0	-0.5	0	Peripherals	d__Bacteria; p__Firmicutes; c__Bacilli; o__Bacillales; f__Planococcaceae; g__Lysinibacillus
bASV3110	1	0.289493	0	-1.10947	0	Peripherals	d__Bacteria; p__Actinobacteriota; c__Thermoleophilia; o__Solirubrobacterales; f__Solirubrobacteraceae; g__Conexibacter; s__uncultured_bacterium
bASV3111	212	0.422932	716.835	0.473145	0.0104164	Peripherals	d__Bacteria; p__Planctomycetota; c__OM190; o__OM190; f__OM190; g__OM190; s__planctomycete_A-2
bASV3117	142	0.404418	408.254	0.141125	0	Peripherals	d__Bacteria; p__Gemmatimonadota; c__Gemmatimonadetes; o__Gemmatimonadales; f__Gemmatimonadaceae; g__Gemmatimonas
bASV312	192	0.41035	4096.49	0.584598	0	Peripherals	d__Bacteria; p__Actinobacteriota; c__Thermoleophilia; o__Gaiellales; f__uncultured; g__uncultured
bASV3123	41	0.336846	241.519	-0.754689	0.0686154	Peripherals	d__Bacteria; p__Actinobacteriota; c__Actinobacteria; o__Frankiales; f__Frankiaceae
bASV313	525	0.495937	9631.85	2.74529	0.499671	Module hubs	d__Bacteria; p__Proteobacteria; c__Gammaproteobacteria; o__Burkholderiales; f__TRA3-20; g__TRA3-20; s__uncultured_gamma
bASV3131	69	0.359386	80.4542	-0.564928	0	Peripherals	d__Bacteria; p__Actinobacteriota; c__Actinobacteria; o__Pseudonocardiales; f__Pseudonocardiaceae; g__Lechevalieria
bASV3134	6	0.310132	7.89277	-1.06512	0.5	Peripherals	d__Bacteria; p__Verrucomicrobiota; c__Verrucomicrobiae; o__Pedosphaerales; f__Pedosphaeraceae; g__Pedosphaeraceae; s__uncultured_subdivision
bASV3139	26	0.364855	2.51428	-0.877076	0.490112	Peripherals	d__Bacteria; p__Proteobacteria; c__Gammaproteobacteria; o__Xanthomonadales; f__Rhodanobacteraceae; g__Chiayiivirga; s__uncultured_bacterium
bASV3146	194	0.394979	3558.7	0.342479	0	Peripherals	d__Bacteria; p__Actinobacteriota; c__Actinobacteria; o__Propionibacteriales; f__Propionibacteriaceae
bASV3147	29	0.348262	55.5612	-0.855298	0	Peripherals	d__Bacteria; p__Actinobacteriota; c__Thermoleophilia; o__Gaiellales; f__Gaiellaceae; g__Gaiella
bASV315	75	0.377224	464.987	-0.453128	0	Peripherals	d__Bacteria; p__Proteobacteria; c__Alphaproteobacteria; o__Rhizobiales; f__Xanthobacteraceae; g__uncultured
bASV3150	3	0.296394	0	-1.04404	0.0857166	Peripherals	d__Bacteria; p__Desulfobacterota; c__Desulfuromonadia; o__Geobacterales; f__Geobacteraceae; g__Geobacteraceae; s__uncultured_bacterium
bASV3155	131	0.404499	138.251	-0.114854	0.119174	Peripherals	d__Bacteria; p__Myxococcota; c__Polyangia; o__Polyangiales; f__Sandaracinaceae; g__uncultured; s__uncultured_Polyangiaceae
bASV3157	24	0.345277	0.0331664	-0.891594	0	Peripherals	d__Bacteria; p__Proteobacteria; c__Gammaproteobacteria; o__Burkholderiales
bASV3158	92	0.363341	1871.13	-0.397965	0.23858	Peripherals	d__Bacteria; p__Actinobacteriota; c__Actinobacteria; o__Micrococcales; f__Intrasporangiaceae; g__Intrasporangium
bASV316	9	0.351729	7.66907	-1.00048	0.509075	Peripherals	d__Bacteria; p__Actinobacteriota; c__Actinobacteria; o__Micrococcales; f__Intrasporangiaceae; g__Intrasporangium
bASV3162	255	0.415515	291.644	0.785293	0.30672	Peripherals	d__Bacteria; p__Proteobacteria; c__Gammaproteobacteria; o__Xanthomonadales; f__Xanthomonadaceae; g__Arenimonas
bASV3163	5	0.320854	0	-1.07399	0	Peripherals	d__Bacteria; p__Actinobacteriota; c__Actinobacteria; o__Frankiales; f__Nakamurellaceae; g__Nakamurella
bASV317	139	0.398339	1314.19	0.114517	0	Peripherals	d__Bacteria; p__Acidobacteriota; c__Subgroup_5; o__Subgroup_5; f__Subgroup_5; g__Subgroup_5; s__uncultured_bacterium
bASV3176	134	0.413383	893.46	-0.0930766	0	Peripherals	d__Bacteria; p__Acidobacteriota; c__Thermoanaerobaculia; o__Thermoanaerobaculales; f__Thermoanaerobaculaceae; g__Subgroup_10
bASV3177	66	0.350749	100.741	-0.532953	0.135524	Peripherals	d__Bacteria; p__MBNT15; c__MBNT15; o__MBNT15; f__MBNT15; g__MBNT15; s__uncultured_bacterium
bASV3182	158	0.386787	62.3294	0.0811455	0.221313	Peripherals	d__Bacteria; p__Proteobacteria; c__Alphaproteobacteria; o__Rhizobiales; f__Rhodomicrobiaceae; g__Rhodomicrobium
bASV3185	128	0.364921	3675.78	0.0169529	0.5	Peripherals	d__Bacteria; p__Gemmatimonadota; c__Gemmatimonadetes; o__Gemmatimonadales; f__Gemmatimonadaceae; g__Gemmatimonas
bASV3188	24	0.324839	38.448	-0.90547	0	Peripherals	d__Bacteria; p__Proteobacteria; c__Alphaproteobacteria; o__Tistrellales; f__Geminicoccaceae; g__Candidatus_Alysiosphaera
bASV3189	7	0.202047	2014.83	0.477497	0	Peripherals	d__Bacteria; p__Proteobacteria; c__Gammaproteobacteria; o__Enterobacterales
bASV319	509	0.5	22344	3.39621	0	Module hubs	d__Bacteria; p__Acidobacteriota; c__Acidobacteriae; o__Acidobacteriales; f__uncultured; g__uncultured
bASV3194	120	0.405476	17.5664	-0.194706	0.0194156	Peripherals	d__Bacteria; p__Proteobacteria; c__Alphaproteobacteria; o__Acetobacterales; f__Acetobacteraceae; g__uncultured; s__metagenome
bASV32	279	0.467719	13718.3	0.959515	0	Peripherals	d__Bacteria; p__Proteobacteria; c__Alphaproteobacteria; o__Rhizobiales; f__Methyloligellaceae; g__uncultured
bASV320	145	0.41646	1773.35	-0.0132248	0	Peripherals	d__Bacteria; p__Proteobacteria; c__Alphaproteobacteria; o__Caulobacterales; f__Hyphomonadaceae; g__Hirschia; s__uncultured_bacterium
bASV3204	104	0.365716	334.762	-0.195914	0.333399	Peripherals	d__Bacteria; p__Myxococcota; c__Polyangia; o__Polyangiales; f__Polyangiaceae; g__Pajaroellobacter; s__uncultured_Polyangiaceae
bASV321	365	0.455141	2519.91	2.11901	0	Peripherals	d__Bacteria; p__Proteobacteria; c__Alphaproteobacteria; o__Rhizobiales; f__Xanthobacteraceae; g__uncultured
bASV322	289	0.456275	1442.32	1.03211	0.251545	Peripherals	d__Bacteria; p__RCP2-54; c__RCP2-54; o__RCP2-54; f__RCP2-54; g__RCP2-54
bASV3222	228	0.406787	607.286	0.589293	0	Peripherals	d__Bacteria; p__Actinobacteriota; c__Actinobacteria; o__Micromonosporales; f__Micromonosporaceae
bASV3231	4	0.316866	0	-1.03678	0.205516	Peripherals	d__Bacteria; p__Actinobacteriota; c__Acidimicrobiia
bASV3239	51	0.327054	93.1896	-0.665995	0.323461	Peripherals	d__Bacteria; p__Firmicutes; c__Bacilli; o__Paenibacillales; f__Paenibacillaceae; g__Paenibacillus
bASV324	403	0.476912	6720.74	2.45605	0	Peripherals	d__Bacteria; p__Proteobacteria; c__Gammaproteobacteria; o__Gammaproteobacteria_Incertae_Sedis; f__Unknown_Family; g__Acidibacter; s__uncultured_gamma
bASV3244	6	0.319936	0.0350877	-1.02226	0	Peripherals	d__Bacteria; p__Proteobacteria; c__Alphaproteobacteria; o__Rhizobiales; f__Xanthobacteraceae; g__uncultured; s__uncultured_Alphaproteobacteria
bASV3245	181	0.386564	1229.77	0.487034	0.244946	Peripherals	d__Bacteria
bASV3246	298	0.424895	876.087	1.09744	0	Peripherals	d__Bacteria; p__Verrucomicrobiota; c__Verrucomicrobiae; o__Pedosphaerales; f__Pedosphaeraceae; g__Pedosphaeraceae
bASV325	167	0.413213	5503.98	0.362861	0	Peripherals	d__Bacteria; p__RCP2-54; c__RCP2-54; o__RCP2-54; f__RCP2-54; g__RCP2-54; s__uncultured_bacterium
bASV326	126	0.404987	2541.58	-0.000786024	0	Peripherals	d__Bacteria; p__Entotheonellaeota; c__Entotheonellia; o__Entotheonellales; f__Entotheonellaceae; g__Entotheonellaceae; s__metagenome
bASV3260	35	0.336508	173.864	-0.811743	0.0459516	Peripherals	d__Bacteria; p__Actinobacteriota; c__Acidimicrobiia; o__Microtrichales
bASV3261	14	0.345632	2016.03	-0.994165	0	Peripherals	d__Bacteria; p__Firmicutes; c__Bacilli; o__Paenibacillales; f__Paenibacillaceae; g__Paenibacillus; s__Paenibacillus_alginolyticus
bASV3266	105	0.347661	179.998	-0.187044	0	Peripherals	d__Bacteria; p__Acidobacteriota; c__Acidobacteriae; o__Acidobacteriales; f__uncultured; g__uncultured
bASV327	2	0.280462	51.8756	-0.724288	0	Peripherals	d__Bacteria; p__Proteobacteria; c__Alphaproteobacteria; o__Rhizobiales; f__Rhodomicrobiaceae; g__Rhodomicrobium
bASV3277	4	0.327799	0	-1.08286	0.137174	Peripherals	d__Bacteria; p__Proteobacteria; c__Alphaproteobacteria; o__Azospirillales; f__Inquilinaceae; g__Inquilinus
bASV3278	76	0.379284	353.751	-0.514113	0.174818	Peripherals	d__Bacteria; p__Actinobacteriota; c__Acidimicrobiia; o__Microtrichales; f__uncultured; g__uncultured
bASV328	194	0.424715	348.863	0.342479	0.167452	Peripherals	d__Bacteria; p__Proteobacteria; c__Gammaproteobacteria; o__Xanthomonadales; f__Xanthomonadaceae
bASV3281	1	0.21078	0	-1.10947	0	Peripherals	d__Bacteria; p__Acidobacteriota; c__Acidobacteriae; o__Bryobacterales; f__Bryobacteraceae; g__Bryobacter; s__uncultured_prokaryote
bASV3287	31	0.338715	2.30061	-0.84078	0	Peripherals	d__Bacteria; p__Acidobacteriota; c__Acidobacteriae; o__Solibacterales; f__Solibacteraceae; g__Candidatus_Solibacter
bASV329	177	0.416891	6333.42	0.451556	0.0753556	Peripherals	d__Bacteria; p__Proteobacteria; c__Gammaproteobacteria; o__PLTA13; f__PLTA13; g__PLTA13; s__uncultured_bacterium
bASV3290	9	0.303222	2038.26	-1.03851	0	Peripherals	d__Bacteria; p__Acidobacteriota; c__Acidobacteriae; o__Bryobacterales; f__Bryobacteraceae; g__Bryobacter
bASV3293	1	0.284102	0	-1.05856	0.306279	Peripherals	d__Bacteria; p__Proteobacteria; c__Gammaproteobacteria; o__Burkholderiales
bASV3294	244	0.424	1027.73	0.705441	0	Peripherals	d__Bacteria; p__Planctomycetota; c__Phycisphaerae; o__Phycisphaerales; f__Phycisphaeraceae; g__SM1A02; s__uncultured_bacterium
bASV3297	32	0.32716	26.9242	-0.834514	0.0537224	Peripherals	d__Bacteria; p__Proteobacteria; c__Alphaproteobacteria; o__Rhizobiales; f__Hyphomicrobiaceae; g__Pedomicrobium
bASV33	210	0.45066	3043.62	0.458627	0	Peripherals	d__Bacteria; p__Proteobacteria; c__Alphaproteobacteria; o__Rhizobiales; f__Xanthobacteraceae; g__Pseudolabrys
bASV330	343	0.453399	1900.77	1.42411	0.294677	Peripherals	d__Bacteria; p__Actinobacteriota; c__Thermoleophilia; o__Gaiellales; f__Gaiellaceae; g__Gaiella
bASV3303	408	0.436214	4819.78	1.89596	0	Peripherals	d__Bacteria; p__Actinobacteriota; c__Acidimicrobiia; o__Microtrichales; f__Iamiaceae; g__Iamia
bASV3304	10	0.312781	748.432	-0.993224	0	Peripherals	d__Bacteria; p__Bacteroidota; c__Bacteroidia; o__Chitinophagales; f__Chitinophagaceae
bASV331	69	0.396926	121.003	-0.564928	0.206111	Peripherals	d__Bacteria; p__Actinobacteriota; c__Acidimicrobiia; o__IMCC26256; f__IMCC26256; g__IMCC26256; s__uncultured_Acidimicrobiia
bASV3312	234	0.400796	399.912	0.632849	0	Peripherals	d__Bacteria; p__Actinobacteriota; c__Actinobacteria; o__Micromonosporales; f__Micromonosporaceae
bASV332	249	0.45391	856.73	0.741738	0.0243124	Peripherals	d__Bacteria; p__Proteobacteria; c__Alphaproteobacteria; o__Rhizobiales; f__Xanthobacteraceae; g__Pseudorhodoplanes
bASV3321	116	0.376378	1354.27	-0.0894805	0.15358	Peripherals	d__Bacteria; p__Bacteroidota; c__Bacteroidia; o__Sphingobacteriales; f__AKYH767; g__AKYH767; s__metagenome
bASV3324	57	0.363801	134.778	-0.652039	0	Peripherals	d__Bacteria; p__Actinobacteriota; c__Thermoleophilia; o__Gaiellales; f__Gaiellaceae; g__Gaiella
bASV333	330	0.45804	2787.13	1.80858	0.16815	Peripherals	d__Bacteria; p__Acidobacteriota; c__Acidobacteriae; o__Subgroup_2; f__Subgroup_2; g__Subgroup_2
bASV3330	99	0.367787	846.336	-0.240261	0.0587695	Peripherals	d__Bacteria; p__Verrucomicrobiota; c__Verrucomicrobiae; o__Pedosphaerales; f__Pedosphaeraceae; g__ADurb.Bin063-1; s__uncultured_bacterium
bASV3331	14	0.330218	51.9254	-0.964187	0	Peripherals	d__Bacteria; p__Proteobacteria; c__Alphaproteobacteria; o__Rhizobiales; f__Xanthobacteraceae; g__Variibacter; s__Variibacter_gotjawalensis
bASV3335	3	0.28531	0.0400631	-1.09173	0	Peripherals	d__Bacteria; p__Actinobacteriota; c__Thermoleophilia; o__Solirubrobacterales; f__Solirubrobacteraceae; g__Conexibacter; s__metagenome
bASV3336	26	0.371655	13.2881	-0.877076	0	Peripherals	d__Bacteria; p__Proteobacteria; c__Alphaproteobacteria; o__uncultured; f__uncultured; g__uncultured; s__uncultured_bacterium
bASV3337	53	0.353706	188.756	-0.648256	0	Peripherals	d__Bacteria; p__Proteobacteria; c__Alphaproteobacteria; o__Rhizobiales; f__Xanthobacteraceae; g__uncultured
bASV3347	73	0.357663	2.49565	-0.470867	0	Peripherals	d__Bacteria; p__Proteobacteria; c__Alphaproteobacteria; o__Rhizobiales; f__Rhizobiaceae; g__Allorhizobium-Neorhizobium-Pararhizobium-Rhizobium
bASV3349	272	0.40728	8649.26	1.29415	0.416827	Peripherals	d__Bacteria; p__Verrucomicrobiota; c__Verrucomicrobiae; o__Pedosphaerales; f__Pedosphaeraceae; g__Pedosphaeraceae; s__uncultured_bacterium
bASV335	181	0.404824	3962.17	0.487034	0.186441	Peripherals	d__Bacteria; p__Proteobacteria; c__Gammaproteobacteria; o__Burkholderiales; f__SC-I-84; g__SC-I-84
bASV3353	115	0.382599	3242.69	-0.09835	0.19193	Peripherals	d__Bacteria; p__Verrucomicrobiota; c__Verrucomicrobiae; o__Pedosphaerales; f__Pedosphaeraceae; g__Pedosphaeraceae
bASV336	263	0.430987	694.948	1.21433	0	Peripherals	d__Bacteria; p__Acidobacteriota; c__Acidobacteriae; o__Subgroup_2; f__Subgroup_2; g__Subgroup_2
bASV3361	32	0.332179	251.034	-0.834514	0	Peripherals	d__Bacteria; p__Proteobacteria; c__Alphaproteobacteria; o__Rhizobiales; f__Rhizobiales_Incertae_Sedis; g__Bauldia; s__uncultured_bacterium
bASV3366	28	0.351668	6.95238	-0.862557	0.170605	Peripherals	d__Bacteria; p__Actinobacteriota; c__Actinobacteria; o__Propionibacteriales; f__Nocardioidaceae; g__Nocardioides
bASV337	1	0.274424	0	-1.05856	0	Peripherals	d__Bacteria; p__Actinobacteriota; c__Actinobacteria; o__Propionibacteriales; f__Nocardioidaceae; g__Marmoricola
bASV3370	39	0.3785	9.66218	-0.782706	0	Peripherals	d__Bacteria; p__NB1-j; c__NB1-j; o__NB1-j; f__NB1-j; g__NB1-j; s__uncultured_Desulfoglaeba
bASV3372	1	0.259972	0	-1.10947	0	Peripherals	d__Bacteria; p__Chloroflexi; c__Chloroflexia; o__Chloroflexales; f__Roseiflexaceae; g__uncultured; s__uncultured_bacterium
bASV338	226	0.436498	4791.11	0.886159	0.151893	Peripherals	d__Bacteria; p__Acidobacteriota; c__Acidobacteriae; o__Acidobacteriales; f__uncultured; g__uncultured
bASV3380	264	0.402961	594.79	1.2232	0.444444	Peripherals	d__Bacteria; p__Actinobacteriota; c__Thermoleophilia; o__Solirubrobacterales; f__Solirubrobacteraceae
bASV3382	157	0.388054	72.2051	0.0738863	0.396694	Peripherals	d__Bacteria; p__Proteobacteria; c__Alphaproteobacteria; o__Elsterales; f__uncultured; g__uncultured
bASV3383	10	0.320242	1.28591	-1.02964	0	Peripherals	d__Bacteria; p__Proteobacteria; c__Alphaproteobacteria; o__Elsterales; f__uncultured; g__uncultured
bASV3384	92	0.362361	284.827	-0.302347	0.5	Peripherals	d__Bacteria; p__Acidobacteriota; c__Subgroup_5; o__Subgroup_5; f__Subgroup_5; g__Subgroup_5; s__uncultured_Acidobacteria
bASV339	413	0.486473	14792.4	1.93226	0	Peripherals	d__Bacteria; p__Proteobacteria; c__Gammaproteobacteria; o__Burkholderiales; f__Nitrosomonadaceae; g__MND1
bASV3399	65	0.335835	564.623	-0.541823	0.00966161	Peripherals	d__Bacteria; p__Acidobacteriota; c__Acidobacteriae; o__Bryobacterales; f__Bryobacteraceae; g__Bryobacter; s__metagenome
bASV34	1	0.258969	0	-1.10947	0	Peripherals	d__Bacteria; p__Proteobacteria; c__Gammaproteobacteria; o__Pseudomonadales; f__Pseudomonadaceae; g__Pseudomonas
bASV3405	121	0.373309	639.043	-0.0451333	0	Peripherals	d__Bacteria; p__Acidobacteriota; c__Acidobacteriae; o__Acidobacteriales; f__uncultured; g__uncultured; s__uncultured_Acidobacteria
bASV3406	5	0.276838	10.7972	0.159676	0	Peripherals	d__Bacteria; p__Firmicutes; c__Clostridia; o__Clostridiales; f__Clostridiaceae; g__Clostridium_sensu_stricto_10
bASV341	93	0.402639	700.883	-0.390706	0.025802	Peripherals	d__Bacteria; p__Actinobacteriota; c__Actinobacteria; o__Micrococcales; f__Micrococcaceae; g__Arthrobacter
bASV3411	4	0.295698	0	-1.08286	0	Peripherals	d__Bacteria; p__Proteobacteria; c__Alphaproteobacteria; o__Micropepsales; f__Micropepsaceae; g__uncultured
bASV342	115	0.406376	194.461	-0.231002	0	Peripherals	d__Bacteria; p__Proteobacteria; c__Gammaproteobacteria; o__Burkholderiales; f__SC-I-84; g__SC-I-84
bASV3422	206	0.396691	131.542	0.42959	0.114329	Peripherals	d__Bacteria; p__Proteobacteria; c__Alphaproteobacteria; o__Rhizobiales; f__Pleomorphomonadaceae; g__Chthonobacter; s__uncultured_bacterium
bASV343	141	0.392746	1234.84	0.132256	0.0893555	Peripherals	d__Bacteria; p__Proteobacteria; c__Alphaproteobacteria; o__Rhizobiales; f__Xanthobacteraceae; g__uncultured; s__uncultured_Pseudolabrys
bASV3437	96	0.372963	146.001	-0.26687	0	Peripherals	d__Bacteria; p__Actinobacteriota; c__MB-A2-108; o__MB-A2-108; f__MB-A2-108; g__MB-A2-108; s__uncultured_bacterium
bASV344	473	0.493506	11817.2	2.36781	0	Peripherals	d__Bacteria; p__Proteobacteria; c__Alphaproteobacteria; o__Rhizobiales; f__KF-JG30-B3; g__KF-JG30-B3; s__uncultured_bacterium
bASV3440	3	0.305568	86.7381	0	0.129547	Peripherals	d__Bacteria; p__Proteobacteria; c__Alphaproteobacteria; o__uncultured; f__uncultured; g__uncultured; s__Rhodospirillaceae_bacterium
bASV3441	145	0.37907	933.787	0.167734	0.292078	Peripherals	d__Bacteria; p__Verrucomicrobiota; c__Verrucomicrobiae; o__Pedosphaerales; f__Pedosphaeraceae; g__ADurb.Bin063-1
bASV3449	274	0.426876	482.663	1.31189	0.449792	Peripherals	d__Bacteria; p__Proteobacteria; c__Alphaproteobacteria; o__Acetobacterales; f__Acetobacteraceae; g__Acidisoma; s__uncultured_bacterium
bASV345	21	0.326154	2285.5	-0.932078	0.197531	Peripherals	d__Bacteria; p__Proteobacteria; c__Alphaproteobacteria; o__Sphingomonadales; f__Sphingomonadaceae; g__Sphingomonas
bASV3450	6	0.331359	0.0463688	-1.02226	0	Peripherals	d__Bacteria; p__Proteobacteria; c__Gammaproteobacteria; o__Burkholderiales; f__Nitrosomonadaceae; g__MND1
bASV3451	41	0.355893	48.0914	-0.768187	0	Peripherals	d__Bacteria; p__Verrucomicrobiota; c__Verrucomicrobiae; o__Pedosphaerales; f__Pedosphaeraceae; g__Pedosphaeraceae; s__uncultured_soil
bASV3454	47	0.340778	666.93	-0.701473	0	Peripherals	d__Bacteria; p__Gemmatimonadota; c__Gemmatimonadetes; o__Gemmatimonadales; f__Gemmatimonadaceae; g__Gemmatimonas
bASV3456	137	0.382163	877.82	0.0967779	0	Peripherals	d__Bacteria; p__Proteobacteria; c__Alphaproteobacteria; o__Rhizobiales; f__Beijerinckiaceae
bASV346	186	0.432932	1723	0.284405	0	Peripherals	d__Bacteria; p__Actinobacteriota; c__Thermoleophilia; o__Gaiellales; f__uncultured; g__uncultured; s__uncultured_Rubrobacterales
bASV3461	1	0.217448	0	-1.05856	0	Peripherals	d__Bacteria; p__Bacteroidota; c__Bacteroidia; o__Chitinophagales; f__Chitinophagaceae; g__uncultured
bASV3464	240	0.400238	279.93	0.676404	0	Peripherals	d__Bacteria; p__Proteobacteria; c__Gammaproteobacteria; o__Cellvibrionales; f__Halieaceae
bASV3466	2	0.286935	0	-1.0513	0	Peripherals	d__Bacteria; p__Actinobacteriota; c__Actinobacteria; o__Kineosporiales; f__Kineosporiaceae; g__uncultured; s__uncultured_bacterium
bASV3468	6	0.282627	0.254699	-1.06512	0	Peripherals	d__Bacteria; p__Actinobacteriota; c__Thermoleophilia; o__Solirubrobacterales; f__Solirubrobacteraceae; g__Conexibacter; s__uncultured_bacterium
bASV3469	1	0.263578	0	-1.05856	0	Peripherals	d__Bacteria; p__Actinobacteriota; c__Acidimicrobiia; o__IMCC26256; f__IMCC26256; g__IMCC26256
bASV347	2	0.75	0	0	0	Peripherals	d__Bacteria; p__Proteobacteria; c__Alphaproteobacteria; o__Rhizobiales; f__Rhizobiaceae; g__Allorhizobium-Neorhizobium-Pararhizobium-Rhizobium
bASV3470	58	0.375326	9.44512	-0.64478	0	Peripherals	d__Bacteria; p__Gemmatimonadota; c__Gemmatimonadetes; o__Gemmatimonadales; f__Gemmatimonadaceae; g__uncultured
bASV3473	62	0.387084	21.3079	-0.615743	0.0263111	Peripherals	d__Bacteria; p__Actinobacteriota; c__Actinobacteria; o__Corynebacteriales; f__Nocardiaceae
bASV3476	3	0.310898	0.0295104	-1.04404	0.48367	Peripherals	d__Bacteria; p__Bacteroidota; c__Bacteroidia; o__Flavobacteriales; f__Flavobacteriaceae; g__Flavobacterium
bASV3477	1	0.243149	0	-1.05856	0.116701	Peripherals	d__Bacteria; p__Bacteroidota; c__Bacteroidia; o__Chitinophagales; f__Chitinophagaceae
bASV348	109	0.402719	1013.98	-0.151567	0.0467958	Peripherals	d__Bacteria; p__Proteobacteria; c__Gammaproteobacteria; o__Burkholderiales; f__TRA3-20; g__TRA3-20
bASV3481	57	0.367116	53.8589	-0.652039	0	Peripherals	d__Bacteria; p__Verrucomicrobiota; c__Verrucomicrobiae; o__Pedosphaerales; f__Pedosphaeraceae; g__Pedosphaeraceae; s__uncultured_subdivision
bASV3483	1	0.290411	0	-1.10947	0	Peripherals	d__Bacteria; p__Actinobacteriota; c__MB-A2-108; o__MB-A2-108; f__MB-A2-108; g__MB-A2-108; s__uncultured_bacterium
bASV3484	90	0.3785	6.91932	-0.412484	0.0917405	Peripherals	d__Bacteria; p__Verrucomicrobiota; c__Verrucomicrobiae; o__Pedosphaerales; f__Pedosphaeraceae; g__Pedosphaeraceae
bASV3488	161	0.386713	1018.03	0.309645	0.0984989	Peripherals	d__Bacteria; p__Actinobacteriota; c__Acidimicrobiia; o__Microtrichales; f__uncultured; g__uncultured; s__uncultured_bacterium
bASV349	73	0.349531	1.4108	-0.470867	0.337804	Peripherals	d__Bacteria; p__Chloroflexi; c__AD3; o__AD3; f__AD3; g__AD3; s__uncultured_Thermomicrobia
bASV3495	145	0.386268	43.8638	-0.0132248	0.567474	Peripherals	d__Bacteria; p__Proteobacteria; c__Gammaproteobacteria; o__PLTA13; f__PLTA13; g__PLTA13; s__metagenome
bASV3497	44	0.368797	44.5631	-0.746409	0.401235	Peripherals	d__Bacteria; p__Actinobacteriota; c__Actinobacteria; o__Propionibacteriales; f__Nocardioidaceae; g__Nocardioides; s__uncultured_organism
bASV35	204	0.424447	6521.14	0.691031	0.00980368	Peripherals	d__Bacteria; p__Proteobacteria; c__Alphaproteobacteria; o__Rhizobiales; f__Xanthobacteraceae; g__Pseudolabrys
bASV350	156	0.420284	175.601	0.066627	0	Peripherals	d__Bacteria; p__Proteobacteria; c__Alphaproteobacteria; o__Rhizobiales; f__Xanthobacteraceae; g__uncultured; s__Afipia_sp.
bASV3506	194	0.409183	20627	0.602337	0.444444	Peripherals	d__Bacteria; p__Proteobacteria; c__Alphaproteobacteria; o__Rhizobiales; f__uncultured; g__uncultured; s__metagenome
bASV351	101	0.35665	91.5832	-0.222522	0	Peripherals	d__Bacteria; p__Proteobacteria; c__Alphaproteobacteria; o__Rhizobiales; f__Xanthobacteraceae; g__Bradyrhizobium
bASV3511	19	0.330164	1016.58	-0.927891	0.0644444	Peripherals	d__Bacteria; p__Bacteroidota; c__Bacteroidia; o__Chitinophagales; f__Chitinophagaceae; g__Dinghuibacter; s__uncultured_bacterium
bASV3518	5	0.28015	1.10841	-1.07399	0	Peripherals	d__Bacteria; p__Proteobacteria; c__Alphaproteobacteria; o__Rhizobiales; f__Xanthobacteraceae; g__uncultured; s__uncultured_Bradyrhizobiaceae
bASV352	1	1	0	0	0	Peripherals	d__Bacteria; p__Bacteroidota; c__Bacteroidia; o__Flavobacteriales; f__Flavobacteriaceae; g__Flavobacterium
bASV3524	14	0.33758	0.250518	-0.994165	0.171361	Peripherals	d__Bacteria; p__Verrucomicrobiota; c__Verrucomicrobiae; o__Pedosphaerales; f__Pedosphaeraceae; g__ADurb.Bin063-1; s__uncultured_bacterium
bASV3525	167	0.420021	597.006	0.146479	0.132653	Peripherals	d__Bacteria; p__Gemmatimonadota; c__AKAU4049; o__AKAU4049; f__AKAU4049; g__AKAU4049
bASV353	198	0.428419	254.722	0.371516	0.163616	Peripherals	d__Bacteria; p__Actinobacteriota; c__Actinobacteria; o__Frankiales; f__Nakamurellaceae; g__Nakamurella
bASV3532	39	0.345218	25.8639	-0.772428	0.253424	Peripherals	d__Bacteria; p__Verrucomicrobiota; c__Verrucomicrobiae; o__Pedosphaerales; f__Pedosphaeraceae
bASV3534	22	0.340894	52.6287	-0.906113	0.35503	Peripherals	d__Bacteria; p__Proteobacteria; c__Alphaproteobacteria; o__Rhizobiales; f__Rhizobiaceae; g__Mesorhizobium
bASV3535	58	0.348986	517.302	-0.603909	0	Peripherals	d__Bacteria; p__Actinobacteriota; c__Actinobacteria; o__Frankiales
bASV3539	5	0.324996	0.340494	-1.07399	0.00668889	Peripherals	d__Bacteria; p__Gemmatimonadota; c__Gemmatimonadetes; o__Gemmatimonadales; f__Gemmatimonadaceae; g__uncultured; s__uncultured_Gemmatimonadales
bASV354	411	0.480554	8853.2	2.52701	0.0131573	Module hubs	d__Bacteria; p__Acidobacteriota; c__Acidobacteriae; o__Acidobacteriales; f__uncultured; g__uncultured
bASV3541	8	0.337297	0.335485	-1.00774	0.270677	Peripherals	d__Bacteria; p__RCP2-54; c__RCP2-54; o__RCP2-54; f__RCP2-54; g__RCP2-54
bASV355	317	0.451367	1877.86	1.69328	0	Peripherals	d__Bacteria; p__Actinobacteriota; c__Thermoleophilia; o__Solirubrobacterales; f__Solirubrobacteraceae; g__Conexibacter
bASV3553	13	0.313609	0.864984	-1.00303	0.0403869	Peripherals	d__Bacteria; p__Proteobacteria; c__Alphaproteobacteria; o__Rhizobiales; f__Beijerinckiaceae; g__Microvirga; s__Microvirga_ossetica
bASV3559	5	0.325258	0.121295	-1.02952	0	Peripherals	d__Bacteria; p__Desulfobacterota; c__uncultured; o__uncultured; f__uncultured; g__uncultured; s__metagenome
bASV356	125	0.40935	257.616	-0.15841	0	Peripherals	d__Bacteria; p__Actinobacteriota; c__Thermoleophilia; o__Gaiellales; f__uncultured; g__uncultured
bASV3567	28	0.349713	0.27687	-0.869992	0	Peripherals	d__Bacteria; p__Proteobacteria; c__Alphaproteobacteria; o__Rhizobiales; f__Hyphomicrobiaceae; g__Hyphomicrobium; s__Hyphomicrobium_denitrificans
bASV3572	1	0.299257	0	-1.05856	0	Peripherals	d__Bacteria; p__Proteobacteria; c__Alphaproteobacteria; o__Rhizobiales; f__Rhizobiales_Incertae_Sedis; g__Bauldia
bASV358	97	0.378785	464.737	-0.258	0	Peripherals	d__Bacteria
bASV3580	27	0.333997	13.1602	-0.878862	0.317119	Peripherals	d__Bacteria; p__Bacteroidota; c__Bacteroidia; o__Cytophagales; f__Microscillaceae; g__uncultured
bASV3583	2	0.306685	0	-1.0513	0.0162591	Peripherals	d__Bacteria; p__Actinobacteriota; c__Actinobacteria; o__Frankiales
bASV3588	74	0.377295	900.988	-0.528632	0.203081	Peripherals	d__Bacteria; p__NB1-j; c__NB1-j; o__NB1-j; f__NB1-j; g__NB1-j
bASV359	186	0.434145	2117.82	0.284405	0	Peripherals	d__Bacteria; p__Proteobacteria; c__Gammaproteobacteria; o__Burkholderiales; f__SC-I-84; g__SC-I-84; s__metagenome
bASV3598	105	0.360222	2004.46	-0.187044	0	Peripherals	d__Bacteria; p__Proteobacteria; c__Gammaproteobacteria; o__Burkholderiales; f__Nitrosomonadaceae; g__mle1-7
bASV3599	9	0.297401	42.7395	-1.00048	0	Peripherals	d__Bacteria; p__Bacteroidota; c__Bacteroidia; o__Chitinophagales; f__Chitinophagaceae
bASV36	1	0.201481	0	-0.994786	0	Peripherals	d__Bacteria; p__Proteobacteria; c__Gammaproteobacteria; o__Enterobacterales; f__Enterobacteriaceae
bASV3603	88	0.383546	8.59151	-0.427002	0.160686	Peripherals	d__Bacteria; p__Gemmatimonadota; c__Gemmatimonadetes; o__Gemmatimonadales; f__Gemmatimonadaceae
bASV362	155	0.416977	126.258	0.0593678	0.0248408	Peripherals	d__Bacteria; p__Actinobacteriota; c__Actinobacteria; o__Micrococcales; f__Microbacteriaceae; g__Microbacterium
bASV3621	5	0.319936	13.2048	-0.175354	0.00930212	Peripherals	d__Bacteria; p__Verrucomicrobiota; c__Verrucomicrobiae; o__Pedosphaerales; f__Pedosphaeraceae; g__Pedosphaeraceae; s__uncultured_bacterium
bASV3625	177	0.396926	353.213	0.219071	0	Peripherals	d__Bacteria; p__Bacteroidota; c__Bacteroidia; o__Sphingobacteriales; f__AKYH767; g__AKYH767; s__uncultured_Sphingobacteriales
bASV3629	206	0.41279	648.43	0.42959	0.215147	Peripherals	d__Bacteria; p__Chloroflexi; c__JG30-KF-CM66; o__JG30-KF-CM66; f__JG30-KF-CM66; g__JG30-KF-CM66; s__uncultured_soil
bASV363	6	0.875	9.16667	1.65359	0	Peripherals	d__Bacteria; p__Proteobacteria; c__Gammaproteobacteria; o__Xanthomonadales; f__Xanthomonadaceae
bASV3634	3	0.267038	2018.35	-1.09173	0	Peripherals	d__Bacteria; p__Gemmatimonadota; c__Gemmatimonadetes; o__Gemmatimonadales; f__Gemmatimonadaceae; g__uncultured
bASV364	70	0.363932	4646.18	-0.497475	0	Peripherals	d__Bacteria; p__Actinobacteriota; c__Thermoleophilia; o__Gaiellales; f__uncultured; g__uncultured
bASV3644	14	0.351545	0.0822931	-0.964187	0	Peripherals	d__Bacteria; p__Actinobacteriota; c__Actinobacteria; o__Pseudonocardiales; f__Pseudonocardiaceae; g__Actinophytocola; s__uncultured_bacterium
bASV365	369	0.467285	16609.3	2.15449	0	Peripherals	d__Bacteria; p__Acidobacteriota; c__Acidobacteriae; o__Solibacterales; f__Solibacteraceae; g__Candidatus_Solibacter
bASV3652	5	0.327746	0.0708621	-1.02952	0	Peripherals	d__Bacteria; p__Proteobacteria; c__Gammaproteobacteria; o__Xanthomonadales; f__Rhodanobacteraceae
bASV3657	1	0.256888	0	-1.10947	0.0735764	Peripherals	d__Bacteria; p__Firmicutes; c__Bacilli; o__Paenibacillales; f__Paenibacillaceae; g__Paenibacillus
bASV366	254	0.449754	27855.2	0.778034	0	Peripherals	d__Bacteria; p__Actinobacteriota; c__Actinobacteria; o__Micrococcales; f__Microbacteriaceae; g__Agromyces
bASV3666	9	0.290872	90.4641	-1.03851	0	Peripherals	d__Bacteria; p__Actinobacteriota; c__Actinobacteria; o__Corynebacteriales; f__Mycobacteriaceae; g__Mycobacterium
bASV367	2	0.271795	22.3133	-1.1006	0	Peripherals	d__Bacteria; p__Proteobacteria; c__Alphaproteobacteria; o__Sphingomonadales; f__Sphingomonadaceae; g__Sphingomonas
bASV3673	195	0.41845	225.922	0.349738	0	Peripherals	d__Bacteria; p__Proteobacteria; c__Gammaproteobacteria; o__EPR3968-O8a-Bc78; f__EPR3968-O8a-Bc78; g__EPR3968-O8a-Bc78
bASV368	9	0.323119	0.635688	-1.03851	0.1472	Peripherals	d__Bacteria; p__Proteobacteria; c__Gammaproteobacteria; o__Burkholderiales; f__Burkholderiaceae; g__Burkholderia-Caballeronia-Paraburkholderia
bASV369	187	0.440797	1518.11	0.291664	0.13875	Peripherals	d__Bacteria; p__Proteobacteria; c__Alphaproteobacteria; o__Rhizobiales; f__Devosiaceae; g__Devosia
bASV3696	13	0.315922	0.277025	-1.00303	0.262091	Peripherals	d__Bacteria; p__Verrucomicrobiota; c__Verrucomicrobiae; o__Pedosphaerales; f__Pedosphaeraceae; g__Pedosphaeraceae
bASV37	109	0.416977	880.965	-0.274558	0.316345	Peripherals	d__Bacteria; p__Proteobacteria; c__Alphaproteobacteria; o__Rhizobiales; f__Rhizobiaceae; g__Allorhizobium-Neorhizobium-Pararhizobium-Rhizobium
bASV370	120	0.413807	967.08	-0.0540027	0	Peripherals	d__Bacteria; p__Proteobacteria; c__Alphaproteobacteria; o__Rhizobiales; f__Hyphomicrobiaceae; g__Hyphomicrobium
bASV3702	131	0.375466	502.879	0.0435612	0	Peripherals	d__Bacteria; p__Proteobacteria; c__Alphaproteobacteria; o__Rhizobiales; f__Beijerinckiaceae; g__Roseiarcus; s__uncultured_bacterium
bASV371	306	0.438398	1253.57	1.59572	0	Peripherals	d__Bacteria; p__Chloroflexi; c__TK10; o__TK10; f__TK10; g__TK10
bASV3710	244	0.417496	237.374	1.04581	0	Peripherals	d__Bacteria; p__Chloroflexi; c__Ktedonobacteria; o__Ktedonobacterales; f__JG30-KF-AS9; g__JG30-KF-AS9; s__uncultured_bacterium
bASV3718	5	0.345218	0	-1.02952	0	Peripherals	d__Bacteria; p__Planctomycetota; c__OM190; o__OM190; f__OM190; g__OM190; s__planctomycete_A-2
bASV3723	62	0.371176	59.4225	-0.615743	0.172336	Peripherals	d__Bacteria; p__Actinobacteriota; c__Acidimicrobiia; o__Microtrichales; f__Microtrichaceae; g__IMCC26207
bASV373	169	0.410518	220.826	0.160997	0.632812	Connectors	d__Bacteria; p__Proteobacteria; c__Alphaproteobacteria; o__Dongiales; f__Dongiaceae; g__Dongia
bASV3730	42	0.354952	10.6733	-0.760928	0.0231182	Peripherals	d__Bacteria; p__Actinobacteriota; c__Actinobacteria; o__Micrococcales; f__Microbacteriaceae; g__Agromyces
bASV3736	13	0.319277	58.972	-1.00303	0	Peripherals	d__Bacteria; p__Acidobacteriota; c__Acidobacteriae; o__Bryobacterales; f__Bryobacteraceae; g__Bryobacter; s__metagenome
bASV3738	26	0.357726	17.3987	-0.877076	0	Peripherals	d__Bacteria; p__Actinobacteriota; c__Actinobacteria; o__Corynebacteriales; f__Nocardiaceae; g__Rhodococcus; s__Rhodococcus_maanshanensis
bASV374	340	0.458457	1844.34	1.89728	0.0529716	Peripherals	d__Bacteria; p__Actinobacteriota; c__Actinobacteria; o__Frankiales; f__Acidothermaceae; g__Acidothermus; s__uncultured_bacterium
bASV3740	1	1	0	0	0	Peripherals	d__Bacteria; p__Actinobacteriota; c__Thermoleophilia; o__Gaiellales; f__uncultured; g__uncultured
bASV3743	142	0.380072	1243.25	0.141125	0	Peripherals	d__Bacteria; p__Acidobacteriota; c__Acidobacteriae; o__Bryobacterales; f__Bryobacteraceae; g__Bryobacter
bASV3748	28	0.371244	249.98	-0.862557	0	Peripherals	d__Bacteria; p__NB1-j; c__NB1-j; o__NB1-j; f__NB1-j; g__NB1-j
bASV375	112	0.408354	89.7173	-0.25278	0	Peripherals	d__Bacteria; p__Proteobacteria; c__Gammaproteobacteria; o__Gammaproteobacteria_Incertae_Sedis; f__Unknown_Family; g__Acidibacter; s__metagenome
bASV3750	14	0.34049	5.22943	-0.994165	0	Peripherals	d__Bacteria; p__Actinobacteriota; c__Acidimicrobiia; o__Microtrichales; f__Iamiaceae; g__Iamia; s__uncultured_Acidimicrobiales
bASV3751	21	0.356839	982.605	-0.932078	0	Peripherals	d__Bacteria; p__Actinobacteriota; c__Acidimicrobiia; o__uncultured; f__uncultured; g__uncultured
bASV3754	14	0.315773	8.79537	-0.994165	0	Peripherals	d__Bacteria; p__Chloroflexi; c__TK10; o__TK10; f__TK10; g__TK10
bASV3757	1	0.168099	0	-0.994786	0.127066	Peripherals	d__Bacteria; p__Proteobacteria; c__Gammaproteobacteria; o__Enterobacterales; f__Enterobacteriaceae
bASV3762	5	0.307904	0	-1.07399	0.0124219	Peripherals	d__Bacteria; p__Acidobacteriota; c__Acidobacteriae; o__Bryobacterales; f__Bryobacteraceae; g__Bryobacter
bASV3763	2	0.333997	0	-1.0513	0	Peripherals	d__Bacteria; p__RCP2-54; c__RCP2-54; o__RCP2-54; f__RCP2-54; g__RCP2-54; s__uncultured_prokaryote
bASV3764	10	0.32395	1.12844	-1.02964	0	Peripherals	d__Bacteria; p__Actinobacteriota; c__Acidimicrobiia; o__IMCC26256; f__IMCC26256; g__IMCC26256
bASV377	299	0.44128	2048.26	1.53363	0	Peripherals	d__Bacteria; p__Proteobacteria; c__Alphaproteobacteria; o__Rhizobiales; f__Xanthobacteraceae; g__uncultured
bASV3770	18	0.356839	3.06217	-0.93515	0	Peripherals	d__Bacteria; p__Bacteroidota; c__Bacteroidia; o__Flavobacteriales; f__NS9_marine_group; g__NS9_marine_group
bASV3775	90	0.376238	89.4283	-0.412484	0	Peripherals	d__Bacteria; p__Proteobacteria; c__Alphaproteobacteria; o__Dongiales; f__Dongiaceae; g__Dongia; s__uncultured_Rhodospirillales
bASV378	80	0.37193	278.841	-0.408781	0	Peripherals	d__Bacteria; p__Actinobacteriota; c__Thermoleophilia; o__Gaiellales; f__uncultured; g__uncultured
bASV3785	4	0.303862	598.509	-0.358332	0	Peripherals	d__Bacteria; p__Planctomycetota; c__Phycisphaerae; o__Phycisphaerales; f__Phycisphaeraceae; g__SM1A02; s__uncultured_bacterium
bASV3788	58	0.357536	110.863	-0.603909	0	Peripherals	d__Bacteria; p__Actinobacteriota; c__Thermoleophilia; o__Gaiellales; f__uncultured; g__uncultured
bASV379	84	0.400238	30.979	-0.456039	0	Peripherals	d__Bacteria; p__Proteobacteria; c__Alphaproteobacteria; o__Rhizobiales; f__Rhizobiaceae; g__Mesorhizobium
bASV3790	260	0.426243	783.335	0.821589	0	Peripherals	d__Bacteria; p__Myxococcota; c__Polyangia; o__mle1-27; f__mle1-27; g__mle1-27; s__Myxococcales_bacterium
bASV3795	1	0.279567	0	-1.05856	0.00793638	Peripherals	d__Bacteria; p__Proteobacteria; c__Alphaproteobacteria; o__Reyranellales; f__Reyranellaceae; g__uncultured
bASV38	88	0.412282	2225.89	-0.337825	0.0281633	Peripherals	d__Bacteria; p__Proteobacteria; c__Alphaproteobacteria; o__Rhizobiales; f__Xanthobacteraceae; g__Bradyrhizobium
bASV380	15	0.33011	12473.5	2.91771	0.220969	Module hubs	d__Bacteria; p__Firmicutes; c__Bacilli; o__Paenibacillales; f__Paenibacillaceae; g__Paenibacillus
bASV381	1	1	0	0	0	Peripherals	d__Bacteria; p__Firmicutes; c__Bacilli; o__Bacillales; f__Bacillaceae; g__Bacillus
bASV3813	2	0.322912	0	-1.0513	0	Peripherals	d__Bacteria; p__Bacteroidota; c__Bacteroidia; o__Cytophagales; f__Microscillaceae; g__uncultured
bASV382	497	0.494476	8132.63	2.54203	0.286866	Module hubs	d__Bacteria; p__Actinobacteriota; c__Thermoleophilia; o__Gaiellales; f__Gaiellaceae; g__Gaiella; s__uncultured_Acidimicrobiia
bASV383	445	0.4911	11996.3	2.16455	0.496591	Peripherals	d__Bacteria; p__Proteobacteria; c__Alphaproteobacteria; o__Rhizobiales; f__Rhizobiales_Incertae_Sedis; g__Bauldia; s__metagenome
bASV3835	17	0.333941	506.944	-0.942409	0.0253581	Peripherals	d__Bacteria; p__Actinobacteriota; c__Thermoleophilia; o__Solirubrobacterales; f__67-14; g__67-14; s__metagenome
bASV3838	300	0.418711	1741.99	1.11196	0	Peripherals	d__Bacteria; p__Actinobacteriota; c__MB-A2-108; o__MB-A2-108; f__MB-A2-108; g__MB-A2-108; s__uncultured_bacterium
bASV384	296	0.449855	3226.18	1.08292	0.0396438	Peripherals	d__Bacteria; p__Proteobacteria; c__Gammaproteobacteria; o__Burkholderiales; f__TRA3-20; g__TRA3-20
bASV385	122	0.412705	445.253	-0.180188	0	Peripherals	d__Bacteria; p__Proteobacteria; c__Alphaproteobacteria; o__Rhizobiales; f__Xanthobacteraceae; g__uncultured; s__uncultured_Hyphomicrobiaceae
bASV386	274	0.448053	4320.06	0.923219	0	Peripherals	d__Bacteria; p__Proteobacteria; c__Alphaproteobacteria; o__Rhizobiales; f__Xanthobacteraceae; g__uncultured
bASV3868	105	0.371039	33.7901	-0.303595	0	Peripherals	d__Bacteria; p__Proteobacteria; c__Alphaproteobacteria; o__Rhizobiales; f__Pleomorphomonadaceae; g__Chthonobacter; s__uncultured_bacterium
bASV387	3	0.168128	1.5	-0.504025	0	Peripherals	d__Bacteria; p__Proteobacteria; c__Gammaproteobacteria; o__Enterobacterales; f__Erwiniaceae; g__Pantoea
bASV3873	233	0.422932	252.02	0.62559	0	Peripherals	d__Bacteria; p__Acidobacteriota; c__Acidobacteriae; o__Bryobacterales; f__Bryobacteraceae; g__Bryobacter
bASV388	98	0.397004	1483.13	-0.249131	0	Peripherals	d__Bacteria; p__Actinobacteriota; c__Thermoleophilia; o__Gaiellales; f__uncultured; g__uncultured
bASV3881	206	0.407362	2975.29	0.70877	0.139694	Peripherals	d__Bacteria; p__Actinobacteriota; c__Acidimicrobiia; o__Microtrichales
bASV3884	340	0.444493	3738.55	1.40233	0	Peripherals	d__Bacteria; p__NB1-j; c__NB1-j; o__NB1-j; f__NB1-j; g__NB1-j; s__uncultured_proteobacterium
bASV3886	193	0.380287	86.3293	0.593467	0	Peripherals	d__Bacteria; p__Proteobacteria; c__Alphaproteobacteria; o__Rhizobiales; f__Xanthobacteraceae; g__uncultured
bASV389	290	0.456586	1675.96	1.03937	0	Peripherals	d__Bacteria; p__Actinobacteriota; c__Thermoleophilia; o__Gaiellales; f__Gaiellaceae; g__Gaiella
bASV39	3	0.306172	0.199742	-1.09173	0	Peripherals	d__Bacteria; p__Proteobacteria; c__Gammaproteobacteria; o__Burkholderiales; f__Burkholderiaceae; g__Cupriavidus
bASV390	9	0.338431	1978.85	1.26289	0	Peripherals	d__Bacteria; p__Firmicutes; c__Bacilli; o__Paenibacillales; f__Paenibacillaceae; g__Paenibacillus
bASV3908	26	0.349228	19.56	-0.877076	0.197531	Peripherals	d__Bacteria; p__Planctomycetota; c__OM190; o__OM190; f__OM190; g__OM190; s__metagenome
bASV392	450	0.486121	7067.35	2.20085	0.486111	Peripherals	d__Bacteria; p__Proteobacteria; c__Gammaproteobacteria; o__Burkholderiales; f__Sutterellaceae; g__uncultured; s__uncultured_bacterium
bASV3921	1	0.254711	0	-1.05856	0.022469	Peripherals	d__Bacteria; p__Proteobacteria; c__Gammaproteobacteria; o__Cellvibrionales; f__Halieaceae; g__OM60(NOR5)_clade
bASV3926	75	0.381729	21.9772	-0.521373	0	Peripherals	d__Bacteria; p__Actinobacteriota; c__Thermoleophilia; o__Solirubrobacterales; f__Solirubrobacteraceae; g__Solirubrobacter
bASV393	493	0.498762	8711.07	2.513	0.0223852	Module hubs	d__Bacteria; p__Verrucomicrobiota; c__Verrucomicrobiae; o__Pedosphaerales; f__Pedosphaeraceae; g__ADurb.Bin063-1; s__uncultured_bacterium
bASV3931	84	0.364789	1075.57	-0.373303	0	Peripherals	d__Bacteria; p__Proteobacteria; c__Alphaproteobacteria; o__Rhizobiales; f__Xanthobacteraceae; g__uncultured
bASV394	1	0.28608	0	-1.05856	0.456498	Peripherals	d__Bacteria; p__Actinobacteriota; c__Actinobacteria; o__Corynebacteriales; f__Mycobacteriaceae; g__Mycobacterium
bASV3944	33	0.346942	36.3292	-0.825645	0	Peripherals	d__Bacteria; p__Verrucomicrobiota; c__Verrucomicrobiae; o__Pedosphaerales; f__Pedosphaeraceae; g__Pedosphaeraceae
bASV395	53	0.370085	233.683	-0.648256	0.00854685	Peripherals	d__Bacteria; p__Proteobacteria; c__Gammaproteobacteria; o__Burkholderiales; f__Burkholderiaceae; g__Burkholderia-Caballeronia-Paraburkholderia
bASV397	124	0.417756	1688.65	-0.165669	0.150497	Peripherals	d__Bacteria; p__Actinobacteriota; c__Actinobacteria; o__Micrococcales; f__Cellulomonadaceae; g__Cellulomonas
bASV3971	1	0.291715	0	-1.05856	0.426664	Peripherals	d__Bacteria; p__Proteobacteria; c__Alphaproteobacteria; o__Reyranellales; f__Reyranellaceae; g__Reyranella
bASV3977	5	0.310659	4.57835	-1.02952	0.221919	Peripherals	d__Bacteria; p__Actinobacteriota; c__Acidimicrobiia; o__Microtrichales; f__Microtrichaceae; g__uncultured
bASV3985	2	0.226445	0	-0.667735	0	Peripherals	d__Bacteria; p__Firmicutes; c__Bacilli; o__Paenibacillales; f__Paenibacillaceae; g__Paenibacillus
bASV399	155	0.416632	3137.82	0.0593678	0	Peripherals	d__Bacteria; p__Actinobacteriota; c__Thermoleophilia; o__Gaiellales; f__uncultured; g__uncultured
bASV3992	1	0.299213	0	-1.10947	0.152778	Peripherals	d__Bacteria; p__Actinobacteriota; c__Actinobacteria; o__Pseudonocardiales; f__Pseudonocardiaceae; g__Lechevalieria
bASV4	4	0.7	1	0.330719	0	Peripherals	d__Bacteria; p__Proteobacteria; c__Gammaproteobacteria; o__Pseudomonadales; f__Pseudomonadaceae; g__Pseudomonas
bASV40	45	0.378287	50.0497	-0.73915	0	Peripherals	d__Bacteria; p__Proteobacteria; c__Alphaproteobacteria; o__Rhizobiales; f__Rhizobiaceae; g__Allorhizobium-Neorhizobium-Pararhizobium-Rhizobium
bASV400	2	0.313073	0	-1.0513	0	Peripherals	d__Bacteria; p__Proteobacteria; c__Gammaproteobacteria; o__Burkholderiales; f__Comamonadaceae
bASV4002	52	0.354702	488.538	-0.688335	0.444444	Peripherals	d__Bacteria; p__Firmicutes; c__Clostridia; o__Clostridiales; f__Clostridiaceae; g__Clostridium_sensu_stricto_8
bASV401	215	0.426876	17751.5	0.788595	0.103979	Peripherals	d__Bacteria; p__Proteobacteria; c__Alphaproteobacteria; o__uncultured; f__uncultured; g__uncultured; s__uncultured_soil
bASV4013	40	0.373032	6.39524	-0.775446	0	Peripherals	d__Bacteria; p__Actinobacteriota; c__Thermoleophilia; o__Solirubrobacterales; f__67-14; g__67-14; s__uncultured_bacterium
bASV402	85	0.391296	1827.31	-0.364434	0.215972	Peripherals	d__Bacteria; p__Actinobacteriota; c__Thermoleophilia; o__Gaiellales
bASV4022	1	0.267641	0	-1.10947	0.117188	Peripherals	d__Bacteria; p__Myxococcota; c__Polyangia; o__Haliangiales; f__Haliangiaceae; g__Haliangium
bASV4025	88	0.363866	492.792	-0.337825	0.190661	Peripherals	d__Bacteria; p__Actinobacteriota; c__Actinobacteria
bASV4026	1	0.236191	0	-0.907266	0.5	Peripherals	d__Bacteria; p__Actinobacteriota; c__MB-A2-108; o__MB-A2-108; f__MB-A2-108; g__MB-A2-108
bASV4029	64	0.349896	2304.16	-0.550692	0	Peripherals	d__Bacteria; p__Actinobacteriota; c__Acidimicrobiia; o__IMCC26256; f__IMCC26256; g__IMCC26256; s__uncultured_actinobacterium
bASV403	130	0.406212	4703.62	0.0346918	0.385832	Peripherals	d__Bacteria; p__Proteobacteria; c__Alphaproteobacteria; o__Rhizobiales; f__A0839; g__A0839; s__uncultured_sludge
bASV4050	8	0.341645	1.1455	-1.00774	0.0196702	Peripherals	d__Bacteria; p__Proteobacteria; c__Alphaproteobacteria; o__Rhizobiales; f__Rhizobiales_Incertae_Sedis; g__uncultured
bASV4054	125	0.389857	49.0525	-0.15841	0	Peripherals	d__Bacteria; p__Actinobacteriota; c__Actinobacteria; o__Propionibacteriales; f__Nocardioidaceae; g__Mumia
bASV4060	11	0.344274	24.4853	-0.985965	0	Peripherals	d__Bacteria; p__Bdellovibrionota; c__Bdellovibrionia; o__Bdellovibrionales; f__Bdellovibrionaceae; g__OM27_clade; s__uncultured_bacterium
bASV407	293	0.463521	3442.61	1.06114	0.639053	Connectors	d__Bacteria; p__Proteobacteria; c__Alphaproteobacteria; o__Rhizobiales; f__Xanthobacteraceae; g__uncultured
bASV4072	21	0.347661	290.139	-0.913372	0.272487	Peripherals	d__Bacteria; p__Proteobacteria; c__Alphaproteobacteria; o__Rhizobiales; f__Pleomorphomonadaceae; g__Chthonobacter; s__uncultured_bacterium
bASV4084	57	0.360157	42.6071	-0.612778	0	Peripherals	d__Bacteria; p__Chloroflexi; c__Ktedonobacteria; o__Ktedonobacterales; f__JG30-KF-AS9; g__JG30-KF-AS9; s__uncultured_bacterium
bASV409	366	0.463308	5020	2.12788	0	Peripherals	d__Bacteria; p__Proteobacteria; c__Gammaproteobacteria; o__Gammaproteobacteria_Incertae_Sedis; f__Unknown_Family; g__Acidibacter
bASV41	206	0.441183	1093.82	0.42959	0	Peripherals	d__Bacteria; p__Proteobacteria; c__Alphaproteobacteria; o__Rhizobiales; f__Rhizobiales_Incertae_Sedis; g__Nordella
bASV410	28	0.365716	643.658	-0.862557	0.193352	Peripherals	d__Bacteria; p__Actinobacteriota; c__Actinobacteria; o__Pseudonocardiales; f__Pseudonocardiaceae; g__Pseudonocardia
bASV4109	166	0.364129	13.3233	0.353992	0	Peripherals	d__Bacteria; p__Myxococcota; c__Myxococcia; o__Myxococcales; f__Myxococcaceae; g__KD3-10; s__uncultured_bacterium
bASV412	112	0.406869	476.774	-0.25278	0	Peripherals	d__Bacteria; p__Proteobacteria; c__Gammaproteobacteria; o__Xanthomonadales; f__Xanthomonadaceae; g__Lysobacter
bASV4122	52	0.34445	69.2194	-0.657125	0	Peripherals	d__Bacteria; p__Proteobacteria; c__Alphaproteobacteria; o__Rhizobiales
bASV413	137	0.419496	627.171	-0.0712988	0.155623	Peripherals	d__Bacteria; p__Acidobacteriota; c__Subgroup_22; o__Subgroup_22; f__Subgroup_22; g__Subgroup_22
bASV4133	1	0.201905	0	-0.994786	0	Peripherals	d__Bacteria; p__Proteobacteria; c__Gammaproteobacteria; o__Enterobacterales
bASV4138	206	0.39897	77.2877	0.42959	0	Peripherals	d__Bacteria; p__Chloroflexi; c__JG30-KF-CM66; o__JG30-KF-CM66; f__JG30-KF-CM66; g__JG30-KF-CM66; s__uncultured_bacterium
bASV414	222	0.437826	3401.76	0.545738	0	Peripherals	d__Bacteria; p__Actinobacteriota; c__Thermoleophilia; o__Solirubrobacterales; f__67-14; g__67-14; s__uncultured_bacterium
bASV415	357	0.461609	4232.29	2.04806	0	Peripherals	d__Bacteria; p__Acidobacteriota; c__Acidobacteriae; o__Acidobacteriales; f__Acidobacteriaceae_(Subgroup_1); g__Occallatibacter
bASV416	16	0.354827	5.07719	-0.949669	0	Peripherals	d__Bacteria; p__Firmicutes; c__Bacilli; o__Bacillales; f__Bacillaceae; g__Bacillus
bASV4162	102	0.35583	0.445485	-0.213653	0	Peripherals	d__Bacteria; p__Firmicutes; c__Clostridia; o__Clostridiales; f__Caloramatoraceae; g__Fonticella; s__uncultured_bacterium
bASV4167	220	0.420811	627.855	0.531219	0.01739	Peripherals	d__Bacteria; p__Acidobacteriota; c__Acidobacteriae; o__Subgroup_2; f__Subgroup_2; g__Subgroup_2; s__uncultured_bacterium
bASV417	153	0.429516	1457.37	0.0448493	0.0323799	Peripherals	d__Bacteria; p__Chloroflexi; c__TK10; o__TK10; f__TK10; g__TK10; s__uncultured_bacterium
bASV4171	142	0.386713	118.009	-0.0350025	0.0176977	Peripherals	d__Bacteria; p__Acidobacteriota; c__Acidobacteriae; o__Solibacterales; f__Solibacteraceae; g__Candidatus_Solibacter
bASV4174	2	0.285755	0	-1.0513	0	Peripherals	d__Bacteria; p__Proteobacteria; c__Gammaproteobacteria; o__Burkholderiales; f__Comamonadaceae; g__Ramlibacter
bASV4176	29	0.363538	17.6967	-0.855298	0	Peripherals	d__Bacteria; p__Gemmatimonadota; c__Gemmatimonadetes; o__Gemmatimonadales; f__Gemmatimonadaceae
bASV4179	64	0.380646	2.63649	-0.601224	0.101746	Peripherals	d__Bacteria; p__Actinobacteriota; c__Acidimicrobiia; o__IMCC26256; f__IMCC26256; g__IMCC26256; s__uncultured_actinobacterium
bASV4180	4	0.306872	9.71393	-1.03678	0	Peripherals	d__Bacteria; p__Actinobacteriota; c__Acidimicrobiia; o__Microtrichales
bASV4186	276	0.403446	603.379	0.937737	0	Peripherals	d__Bacteria; p__Proteobacteria; c__Alphaproteobacteria; o__Azospirillales; f__uncultured; g__uncultured
bASV4189	42	0.364789	1.80786	-0.760928	0	Peripherals	d__Bacteria; p__Actinobacteriota; c__Actinobacteria; o__Micromonosporales; f__Micromonosporaceae; g__Actinoplanes
bASV419	1	0.258969	0	-1.10947	0.249586	Peripherals	d__Bacteria; p__Proteobacteria; c__Gammaproteobacteria; o__Pseudomonadales; f__Pseudomonadaceae; g__Pseudomonas
bASV4198	4	0.299435	0.0569217	-1.03678	0	Peripherals	d__Bacteria; p__Proteobacteria; c__Gammaproteobacteria; o__R7C24; f__R7C24; g__R7C24; s__uncultured_bacterium
bASV420	57	0.352838	145.549	-0.612778	0.0540123	Peripherals	d__Bacteria; p__Nitrospirota; c__Nitrospiria; o__Nitrospirales; f__Nitrospiraceae; g__Nitrospira
bASV422	389	0.468046	6586.34	2.33188	0.496924	Peripherals	d__Bacteria; p__Proteobacteria; c__Alphaproteobacteria; o__Rhizobiales; f__Xanthobacteraceae; g__Rhodoplanes
bASV4226	14	0.32286	0.765439	-0.994165	0.104938	Peripherals	d__Bacteria; p__Actinobacteriota; c__Thermoleophilia; o__Gaiellales; f__Gaiellaceae; g__Gaiella; s__uncultured_Rubrobacteria
bASV424	10	0.308612	0.403377	-1.02964	0	Peripherals	d__Bacteria; p__Actinobacteriota; c__Thermoleophilia; o__Gaiellales; f__Gaiellaceae; g__Gaiella; s__uncultured_Rubrobacteria
bASV4247	6	0.290369	0	-1.06512	0.260963	Peripherals	d__Bacteria; p__Proteobacteria; c__Alphaproteobacteria; o__Rhizobiales; f__Xanthobacteraceae; g__Pseudorhodoplanes; s__uncultured_bacterium
bASV425	35	0.34153	21.7289	-0.807906	0	Peripherals	d__Bacteria; p__Actinobacteriota; c__Actinobacteria; o__Streptomycetales; f__Streptomycetaceae; g__Streptomyces
bASV426	17	0.357219	40.64	-0.942409	0	Peripherals	d__Bacteria; p__Nitrospirota; c__Nitrospiria; o__Nitrospirales; f__Nitrospiraceae; g__Nitrospira; s__uncultured_organism
bASV427	444	0.488006	9098.33	2.15729	0	Peripherals	d__Bacteria; p__Bacteroidota; c__Bacteroidia; o__Cytophagales; f__Microscillaceae; g__uncultured
bASV4274	5	0.324734	0	-1.02952	0.231415	Peripherals	d__Bacteria; p__Nitrospirota; c__Nitrospiria; o__Nitrospirales; f__Nitrospiraceae; g__Nitrospira
bASV4294	22	0.358491	2.8554	-0.906113	0	Peripherals	d__Bacteria; p__Myxococcota; c__Myxococcia; o__Myxococcales; f__Myxococcaceae; g__P3OB-42; s__metagenome
bASV430	81	0.360867	5.65969	-0.399911	0	Peripherals	d__Bacteria; p__Proteobacteria; c__Alphaproteobacteria; o__Reyranellales; f__Reyranellaceae; g__Reyranella
bASV4310	157	0.407775	2173.05	0.0738863	0	Peripherals	d__Bacteria; p__Actinobacteriota; c__Acidimicrobiia; o__Microtrichales; f__Ilumatobacteraceae; g__CL500-29_marine_group
bASV4313	16	0.341298	78.8179	1.8374	0	Peripherals	d__Bacteria; p__Acidobacteriota; c__Blastocatellia
bASV4318	3	0.264965	23.1439	-1.09173	0	Peripherals	d__Bacteria; p__Acidobacteriota; c__Acidobacteriae; o__Bryobacterales; f__Bryobacteraceae; g__Bryobacter; s__metagenome
bASV432	262	0.445575	1254.64	0.836108	0.0210502	Peripherals	d__Bacteria; p__Proteobacteria; c__Alphaproteobacteria; o__Rhizobiales; f__Xanthobacteraceae; g__Rhodoplanes
bASV4323	12	0.317365	4.45538	-1.0119	0.5	Peripherals	d__Bacteria; p__Planctomycetota; c__OM190; o__OM190; f__OM190; g__OM190; s__planctomycete_A-2
bASV433	67	0.390537	331.587	-0.579447	0	Peripherals	d__Bacteria; p__Proteobacteria; c__Alphaproteobacteria; o__Rhizobiales; f__Methyloligellaceae; g__uncultured
bASV4332	40	0.325732	279.236	-0.763559	0.422716	Peripherals	d__Bacteria; p__Proteobacteria; c__Alphaproteobacteria; o__Rhizobiales; f__Rhizobiales_Incertae_Sedis; g__Bauldia
bASV434	295	0.461186	2766.32	1.07566	0.106914	Peripherals	d__Bacteria; p__Proteobacteria; c__Gammaproteobacteria; o__Burkholderiales; f__Nitrosomonadaceae; g__MND1
bASV435	93	0.383912	2249.6	-0.293478	0.236608	Peripherals	d__Bacteria; p__Actinobacteriota; c__Actinobacteria; o__Propionibacteriales; f__Nocardioidaceae; g__Nocardioides; s__uncultured_bacterium
bASV436	5	0.316418	0.493797	-1.02952	0	Peripherals	d__Bacteria; p__Firmicutes; c__Bacilli; o__Bacillales; f__Bacillaceae; g__Bacillus; s__Bacillus_litoralis
bASV437	521	0.499009	18669.1	2.71625	0.192841	Module hubs	d__Bacteria; p__Actinobacteriota; c__Thermoleophilia; o__Gaiellales; f__Gaiellaceae; g__Gaiella
bASV4377	319	0.433211	2582.54	1.24989	0	Peripherals	d__Bacteria; p__Actinobacteriota; c__Thermoleophilia; o__Gaiellales; f__uncultured; g__uncultured; s__bacterium_Ellin6517
bASV4383	93	0.372825	96.394	-0.293478	0.175776	Peripherals	d__Bacteria; p__Verrucomicrobiota; c__Verrucomicrobiae; o__Pedosphaerales; f__Pedosphaeraceae; g__Pedosphaeraceae; s__uncultured_Verrucomicrobia
bASV4385	9	0.338829	0.00819672	-1.00048	0.401743	Peripherals	d__Bacteria; p__Verrucomicrobiota; c__Verrucomicrobiae; o__Pedosphaerales; f__Pedosphaeraceae
bASV4386	4	0.319429	0	-1.08286	0	Peripherals	d__Bacteria; p__Verrucomicrobiota; c__Verrucomicrobiae; o__Pedosphaerales; f__Pedosphaeraceae; g__ADurb.Bin063-1
bASV439	331	0.459817	1844.3	1.337	0	Peripherals	d__Bacteria; p__Proteobacteria; c__Gammaproteobacteria; o__PLTA13; f__PLTA13; g__PLTA13
bASV44	3	0.583333	0.666667	-0.330719	0.1298	Peripherals	d__Bacteria; p__Proteobacteria; c__Gammaproteobacteria; o__Pseudomonadales; f__Pseudomonadaceae; g__Pseudomonas
bASV440	4	0.294444	3.07438	-1.08286	0.140525	Peripherals	d__Bacteria; p__Firmicutes; c__Bacilli; o__Bacillales; f__Bacillaceae; g__Bacillus
bASV4402	11	0.319835	0.890731	-0.985965	0	Peripherals	d__Bacteria; p__Acidobacteriota; c__Subgroup_22; o__Subgroup_22; f__Subgroup_22; g__Subgroup_22; s__uncultured_proteobacterium
bASV441	411	0.476461	9937.86	2.52701	0	Module hubs	d__Bacteria; p__Proteobacteria; c__Alphaproteobacteria; o__Rhizobiales; f__Xanthobacteraceae; g__uncultured
bASV4411	22	0.361905	0.0364408	-0.906113	0	Peripherals	d__Bacteria; p__Planctomycetota; c__Phycisphaerae; o__Phycisphaerales; f__Phycisphaeraceae; g__SM1A02
bASV442	100	0.404174	149.69	-0.339891	0	Peripherals	d__Bacteria; p__Proteobacteria; c__Alphaproteobacteria; o__Rhizobiales; f__Xanthobacteraceae; g__Rhodoplanes
bASV4446	4	0.298769	0.304167	-1.03678	0.0475907	Peripherals	d__Bacteria; p__Desulfobacterota; c__Desulfuromonadia; o__Geobacterales; f__Geobacteraceae; g__Citrifermentans
bASV4458	46	0.370425	0.113119	-0.731891	0	Peripherals	d__Bacteria; p__Proteobacteria; c__Alphaproteobacteria; o__uncultured; f__uncultured; g__uncultured; s__uncultured_Acetobacteraceae
bASV4459	16	0.324786	2.27972	-0.976426	0.0605469	Peripherals	d__Bacteria; p__Verrucomicrobiota; c__Verrucomicrobiae; o__Pedosphaerales; f__Pedosphaeraceae
bASV4466	12	0.344686	21.8364	-0.978706	0	Peripherals	d__Bacteria; p__Verrucomicrobiota; c__Verrucomicrobiae; o__Pedosphaerales; f__Pedosphaeraceae; g__Pedosphaeraceae; s__uncultured_bacterium
bASV447	8	0.307528	2262.72	0.987087	0	Peripherals	d__Bacteria; p__Firmicutes; c__Clostridia; o__Clostridiales; f__Clostridiaceae; g__Clostridium_sensu_stricto_13
bASV4472	239	0.398733	880.345	0.669145	0	Peripherals	d__Bacteria; p__Proteobacteria; c__Alphaproteobacteria; o__Acetobacterales; f__Acetobacteraceae; g__Roseomonas
bASV448	347	0.455038	2054.68	1.95936	0	Peripherals	d__Bacteria; p__Acidobacteriota; c__Acidobacteriae; o__Acidobacteriales; f__uncultured; g__uncultured; s__uncultured_forest
bASV4487	14	0.304322	0.622927	-0.994165	0	Peripherals	d__Bacteria; p__Acidobacteriota; c__Thermoanaerobaculia; o__Thermoanaerobaculales; f__Thermoanaerobaculaceae; g__Subgroup_10; s__uncultured_Acidobacteria
bASV449	134	0.418189	1609.57	-0.0930766	0.0155029	Peripherals	d__Bacteria; p__Actinobacteriota; c__Actinobacteria; o__Corynebacteriales; f__Nocardiaceae; g__Rhodococcus
bASV4499	12	0.341819	0.0260443	-0.978706	0	Peripherals	d__Bacteria; p__MBNT15; c__MBNT15; o__MBNT15; f__MBNT15; g__MBNT15
bASV45	152	0.424984	2686.38	0.03759	0.215599	Peripherals	d__Bacteria; p__Proteobacteria; c__Alphaproteobacteria; o__Reyranellales; f__Reyranellaceae; g__Reyranella
bASV450	183	0.403931	4350.16	0.504773	0.124444	Peripherals	d__Bacteria; p__Proteobacteria; c__Alphaproteobacteria; o__Rhizobiales; f__Rhizobiaceae
bASV4500	33	0.332453	57.0034	-0.825645	0.375	Peripherals	d__Bacteria; p__Gemmatimonadota; c__Gemmatimonadetes; o__Gemmatimonadales; f__Gemmatimonadaceae; g__Gemmatimonas; s__uncultured_bacterium
bASV451	99	0.389179	725.042	-0.240261	0	Peripherals	d__Bacteria; p__Proteobacteria; c__Gammaproteobacteria; o__Burkholderiales; f__Sutterellaceae; g__uncultured; s__uncultured_bacterium
bASV4513	8	0.300418	2.86381	-1.04738	0	Peripherals	d__Bacteria; p__Actinobacteriota; c__Actinobacteria; o__Pseudonocardiales; f__Pseudonocardiaceae; g__Pseudonocardia
bASV4518	10	0.308187	5.08646	-1.02964	0.0497895	Peripherals	d__Bacteria; p__Myxococcota; c__Polyangia; o__Haliangiales; f__Haliangiaceae; g__Haliangium
bASV452	204	0.436687	3236.84	0.415071	0.345679	Peripherals	d__Bacteria; p__Acidobacteriota; c__Subgroup_5; o__Subgroup_5; f__Subgroup_5; g__Subgroup_5; s__uncultured_bacterium
bASV4520	5	0.28101	15.7899	-1.07399	0	Peripherals	d__Bacteria; p__Proteobacteria; c__Alphaproteobacteria; o__Rhizobiales; f__Rhizobiaceae; g__Mesorhizobium; s__uncultured_Mesorhizobium
bASV4522	24	0.313414	341.289	-0.90547	0	Peripherals	d__Bacteria; p__Proteobacteria; c__Alphaproteobacteria; o__Rhizobiales; f__Amb-16S-1323; g__Amb-16S-1323
bASV453	231	0.441086	6993.68	0.930506	0	Peripherals	d__Bacteria; p__Acidobacteriota; c__Acidobacteriae; o__Acidobacteriales; f__uncultured; g__uncultured; s__uncultured_Acidobacteria
bASV4534	5	0.324368	0.639029	-1.02952	0.214803	Peripherals	d__Bacteria; p__Proteobacteria; c__Alphaproteobacteria; o__uncultured; f__uncultured; g__uncultured
bASV4537	9	0.346763	5.13741	-1.00048	0	Peripherals	d__Bacteria; p__Proteobacteria; c__Alphaproteobacteria; o__Rhizobiales; f__Beijerinckiaceae; g__Microvirga; s__uncultured_bacterium
bASV454	94	0.397788	2847.39	-0.383447	0.32	Peripherals	d__Bacteria; p__Proteobacteria; c__Alphaproteobacteria; o__Rhizobiales; f__Labraceae; g__Labrys
bASV4556	113	0.382163	162.454	-0.245521	0.310418	Peripherals	d__Bacteria; p__Proteobacteria; c__Alphaproteobacteria; o__Rhizobiales; f__Rhizobiaceae; g__Mesorhizobium
bASV456	81	0.39031	1216.6	-0.477817	0	Peripherals	d__Bacteria; p__Proteobacteria; c__Gammaproteobacteria; o__Steroidobacterales; f__Steroidobacteraceae; g__uncultured
bASV4567	27	0.363604	172.295	-0.869817	0	Peripherals	d__Bacteria; p__Bacteroidota; c__Bacteroidia; o__Chitinophagales; f__Chitinophagaceae
bASV457	19	0.370425	0.418138	-0.927891	0	Peripherals	d__Bacteria; p__Proteobacteria; c__Alphaproteobacteria; o__Sphingomonadales; f__Sphingomonadaceae; g__Sphingomonas
bASV4579	33	0.369813	1.7131	-0.826261	0	Peripherals	d__Bacteria; p__NB1-j; c__NB1-j; o__NB1-j; f__NB1-j; g__NB1-j; s__uncultured_Desulfuromonadaceae
bASV458	228	0.393821	544.106	0.903898	0.276877	Peripherals	d__Bacteria; p__Acidobacteriota; c__Acidobacteriae; o__Subgroup_2; f__Subgroup_2; g__Subgroup_2
bASV4583	25	0.322137	10.603	-0.896601	0	Peripherals	d__Bacteria; p__Chloroflexi; c__Chloroflexia; o__Chloroflexales; f__Chloroflexaceae; g__FFCH7168; s__uncultured_bacterium
bASV459	128	0.398654	1724.58	0.0169529	0	Peripherals	d__Bacteria; p__Desulfobacterota; c__uncultured; o__uncultured; f__uncultured; g__uncultured; s__uncultured_soil
bASV46	106	0.397866	1328.91	-0.178175	0	Peripherals	d__Bacteria; p__Proteobacteria; c__Alphaproteobacteria; o__Rhizobiales; f__Xanthobacteraceae; g__uncultured
bASV460	289	0.449554	2804.68	1.03211	0	Peripherals	d__Bacteria; p__Proteobacteria; c__Alphaproteobacteria; o__Rhizobiales; f__Methyloligellaceae; g__uncultured
bASV4608	17	0.355579	0.00787402	-0.942409	0	Peripherals	d__Bacteria; p__Actinobacteriota; c__Actinobacteria; o__Micromonosporales; f__Micromonosporaceae
bASV4622	12	0.339686	0.0700328	-1.0119	0	Peripherals	d__Bacteria; p__Myxococcota; c__Polyangia; o__mle1-27; f__mle1-27; g__mle1-27; s__uncultured_Polyangiaceae
bASV4624	2	0.306545	0	-1.0513	0	Peripherals	d__Bacteria; p__Actinobacteriota; c__Thermoleophilia; o__Solirubrobacterales; f__Solirubrobacteraceae; g__uncultured; s__Phytoplasma_sp.
bASV463	573	0.506539	15605.5	3.09374	0.0231628	Module hubs	d__Bacteria; p__Actinobacteriota; c__Acidimicrobiia; o__Microtrichales; f__Ilumatobacteraceae; g__uncultured
bASV4631	7	0.28231	0.0885063	-1.05625	0.334688	Peripherals	d__Bacteria; p__Proteobacteria; c__Alphaproteobacteria; o__Rhizobiales; f__Hyphomicrobiaceae; g__Hyphomicrobium; s__metagenome
bASV4637	7	0.322343	2.07484	-1.015	0.191327	Peripherals	d__Bacteria; p__Proteobacteria; c__Alphaproteobacteria; o__Rhizobiales; f__Rhizobiales_Incertae_Sedis; g__uncultured; s__metagenome
bASV464	165	0.400318	4921.12	0.345123	0.151017	Peripherals	d__Bacteria; p__Proteobacteria; c__Alphaproteobacteria; o__Azospirillales; f__uncultured; g__uncultured; s__uncultured_bacterium
bASV4641	134	0.378074	811.672	0.0701696	0	Peripherals	d__Bacteria; p__Actinobacteriota; c__Thermoleophilia; o__Gaiellales; f__uncultured; g__uncultured
bASV465	261	0.443906	8418	1.19659	0	Peripherals	d__Bacteria; p__Acidobacteriota; c__Acidobacteriae; o__Acidobacteriales; f__Acidobacteriaceae_(Subgroup_1); g__Edaphobacter
bASV4661	214	0.410937	446.712	0.487664	0	Peripherals	d__Bacteria; p__Actinobacteriota; c__Acidimicrobiia; o__Microtrichales
bASV467	361	0.46642	4082.09	1.55477	0	Peripherals	d__Bacteria; p__Proteobacteria; c__Alphaproteobacteria; o__Rhizobiales; f__Xanthobacteraceae
bASV4670	56	0.380646	14.6382	-0.659298	0	Peripherals	d__Bacteria
bASV468	56	0.364657	1001.86	-0.621648	0	Peripherals	d__Bacteria; p__Chloroflexi; c__TK10; o__TK10; f__TK10; g__TK10; s__uncultured_bacterium
bASV469	70	0.388353	233.42	-0.557669	0	Peripherals	d__Bacteria; p__Actinobacteriota; c__Actinobacteria; o__Micrococcales; f__Intrasporangiaceae
bASV47	485	0.50262	14249.4	2.45492	0	Peripherals	d__Bacteria; p__Actinobacteriota; c__Thermoleophilia; o__Gaiellales; f__Gaiellaceae; g__Gaiella
bASV471	134	0.395134	895.994	0.0701696	0	Peripherals	d__Bacteria; p__Actinobacteriota; c__Acidimicrobiia
bASV4711	2	0.301813	0	-1.0513	0.103394	Peripherals	d__Bacteria; p__Acidobacteriota; c__Blastocatellia
bASV472	78	0.381873	561.908	-0.42652	0.50033	Peripherals	d__Bacteria; p__Nitrospirota; c__Nitrospiria; o__Nitrospirales; f__Nitrospiraceae; g__Nitrospira
bASV473	275	0.447456	8279.23	1.32076	0	Peripherals	d__Bacteria; p__Proteobacteria; c__Alphaproteobacteria; o__Rhizobiales; f__KF-JG30-B3; g__KF-JG30-B3
bASV4731	51	0.368123	134.371	-0.695595	0.277778	Peripherals	d__Bacteria; p__Proteobacteria; c__Gammaproteobacteria; o__Cellvibrionales; f__Halieaceae; g__OM60(NOR5)_clade
bASV474	287	0.427419	810.307	1.4272	0	Peripherals	d__Bacteria; p__Actinobacteriota; c__Actinobacteria; o__Frankiales; f__Acidothermaceae; g__Acidothermus
bASV4745	10	0.297973	8.86311	-1.02964	0	Peripherals	d__Bacteria; p__Acidobacteriota; c__Acidobacteriae; o__Bryobacterales; f__Bryobacteraceae; g__Bryobacter
bASV475	181	0.409266	7860.72	0.487034	0	Peripherals	d__Bacteria; p__Chloroflexi; c__TK10; o__TK10; f__TK10; g__TK10; s__uncultured_bacterium
bASV477	2	0.24597	0	-1.1006	0.188366	Peripherals	d__Bacteria; p__Proteobacteria; c__Gammaproteobacteria; o__Xanthomonadales; f__Rhodanobacteraceae
bASV478	37	0.376449	1.82281	-0.797224	0.0384468	Peripherals	d__Bacteria; p__NB1-j; c__NB1-j; o__NB1-j; f__NB1-j; g__NB1-j
bASV4780	16	0.312442	31.6735	-0.976426	0.197531	Peripherals	d__Bacteria; p__Acidobacteriota; c__Acidobacteriae
bASV479	535	0.510132	16970.8	2.81788	0	Module hubs	d__Bacteria; p__Proteobacteria; c__Alphaproteobacteria; o__Rhizobiales; f__Rhizobiales_Incertae_Sedis; g__Nordella; s__uncultured_Alphaproteobacteria
bASV4795	46	0.332618	51.7452	-0.710342	0.0976369	Peripherals	d__Bacteria; p__Verrucomicrobiota; c__Verrucomicrobiae; o__Pedosphaerales; f__Pedosphaeraceae; g__ADurb.Bin063-1
bASV48	81	0.364723	1137.8	-0.399911	0	Peripherals	d__Bacteria; p__Firmicutes; c__Bacilli; o__Bacillales; f__Bacillaceae; g__Bacillus
bASV480	2	0.286486	0	-1.1006	0.0709097	Peripherals	d__Bacteria; p__Firmicutes; c__Bacilli; o__Bacillales; f__Bacillaceae; g__Bacillus; s__Bacillus_litoralis
bASV481	180	0.404824	743.551	0.240849	0	Peripherals	d__Bacteria; p__Proteobacteria; c__Gammaproteobacteria; o__Burkholderiales; f__Comamonadaceae; g__Ramlibacter; s__Ramlibacter_sp.
bASV4815	1	0.268176	0	-1.10947	0.0688776	Peripherals	d__Bacteria; p__Proteobacteria; c__Alphaproteobacteria; o__Rhizobiales; f__Rhizobiales_Incertae_Sedis; g__Bauldia; s__uncultured_bacterium
bASV4817	214	0.375887	253.734	0.779726	0	Peripherals	d__Bacteria; p__Actinobacteriota; c__Thermoleophilia; o__Gaiellales; f__uncultured; g__uncultured; s__uncultured_Solirubrobacter
bASV482	327	0.472548	51241.6	1.30796	0	Peripherals	d__Bacteria; p__Proteobacteria; c__Alphaproteobacteria; o__Rhizobiales; f__Rhizobiaceae
bASV4823	78	0.362035	31.693	-0.42652	0.343827	Peripherals	d__Bacteria; p__Chloroflexi; c__Dehalococcoidia; o__S085; f__S085; g__S085; s__metagenome
bASV483	1	0.268176	0	-1.10947	0	Peripherals	d__Bacteria; p__Acidobacteriota; c__Acidobacteriae; o__Acidobacteriales; f__uncultured; g__uncultured
bASV4834	82	0.347781	0.233472	-0.391042	0.0377219	Peripherals	d__Bacteria; p__Planctomycetota; c__Pla4_lineage; o__Pla4_lineage; f__Pla4_lineage; g__Pla4_lineage; s__uncultured_Planctomycetaceae
bASV4847	201	0.403284	2636.56	0.393293	0	Peripherals	d__Bacteria; p__Chloroflexi; c__JG30-KF-CM66; o__JG30-KF-CM66; f__JG30-KF-CM66; g__JG30-KF-CM66; s__uncultured_Anaerolineales
bASV486	219	0.434333	10696.2	0.824073	0	Peripherals	d__Bacteria; p__Actinobacteriota; c__Acidimicrobiia; o__Microtrichales; f__Ilumatobacteraceae; g__CL500-29_marine_group; s__metagenome
bASV4862	31	0.36846	0.105731	-0.84078	0	Peripherals	d__Bacteria; p__Chloroflexi; c__TK10; o__TK10; f__TK10; g__TK10; s__uncultured_bacterium
bASV487	5	0.202006	2	-0.0132638	0	Peripherals	d__Bacteria; p__Proteobacteria; c__Gammaproteobacteria; o__Enterobacterales; f__Enterobacteriaceae
bASV4871	30	0.363538	7.48869	-0.848039	0.12745	Peripherals	d__Bacteria; p__Proteobacteria; c__Gammaproteobacteria; o__CCM19a; f__CCM19a; g__CCM19a; s__uncultured_bacterium
bASV488	153	0.408602	641.947	0.238689	0	Peripherals	d__Bacteria; p__Actinobacteriota; c__Acidimicrobiia; o__Microtrichales; f__uncultured; g__uncultured
bASV489	6	0.348021	0.123434	-1.02226	0.328943	Peripherals	d__Bacteria; p__Proteobacteria; c__Alphaproteobacteria; o__Sphingomonadales; f__Sphingomonadaceae; g__Novosphingobium
bASV4894	4	0.327373	0.650807	-1.03678	0.127604	Peripherals	d__Bacteria; p__Actinobacteriota; c__Thermoleophilia; o__Solirubrobacterales; f__67-14; g__67-14; s__uncultured_actinobacterium
bASV49	101	0.403931	2943.31	-0.332632	0	Peripherals	d__Bacteria; p__Actinobacteriota; c__Actinobacteria; o__Streptomycetales; f__Streptomycetaceae; g__Streptomyces
bASV490	14	0.325153	4.52283	-0.994165	0.106245	Peripherals	d__Bacteria; p__Actinobacteriota; c__Acidimicrobiia; o__Microtrichales; f__uncultured; g__uncultured
bASV4911	176	0.375116	45.2015	0.442687	0	Peripherals	d__Bacteria; p__Actinobacteriota; c__Acidimicrobiia; o__IMCC26256; f__IMCC26256; g__IMCC26256
bASV492	256	0.440797	1468.27	1.15224	0	Peripherals	d__Bacteria; p__Chloroflexi; c__AD3; o__AD3; f__AD3; g__AD3; s__uncultured_bacterium
bASV493	286	0.445772	1084.02	1.41833	0.188084	Peripherals	d__Bacteria; p__Proteobacteria; c__Gammaproteobacteria; o__Burkholderiales; f__Sutterellaceae; g__uncultured; s__uncultured_bacterium
bASV494	242	0.44099	8111.4	1.02807	0	Peripherals	d__Bacteria; p__Desulfobacterota; c__uncultured; o__uncultured; f__uncultured; g__uncultured
bASV4941	3	0.328173	0	-1.04404	0	Peripherals	d__Bacteria; p__Proteobacteria; c__Alphaproteobacteria; o__Rhizobiales; f__Beijerinckiaceae; g__Microvirga; s__uncultured_bacterium
bASV495	223	0.43993	4169.61	0.552997	0.345679	Peripherals	d__Bacteria; p__Actinobacteriota; c__MB-A2-108; o__MB-A2-108; f__MB-A2-108; g__MB-A2-108; s__uncultured_bacterium
bASV496	171	0.426695	1334.08	0.175516	0.455	Peripherals	d__Bacteria; p__Proteobacteria; c__Alphaproteobacteria; o__Rhizobiales; f__Xanthobacteraceae; g__uncultured
bASV497	14	0.329624	1642.4	1.47145	0.530185	Peripherals	d__Bacteria; p__Actinobacteriota; c__Thermoleophilia; o__Gaiellales; f__uncultured; g__uncultured
bASV498	302	0.45473	1888.38	1.12648	0	Peripherals	d__Bacteria; p__Actinobacteriota; c__Actinobacteria; o__Micrococcales; f__Microbacteriaceae; g__Agromyces
bASV499	51	0.384498	42.803	-0.695595	0	Peripherals	d__Bacteria
bASV5	15	0.252952	15890.2	2.44054	0.0675862	Peripherals	d__Bacteria; p__Proteobacteria; c__Gammaproteobacteria; o__Enterobacterales
bASV50	234	0.444297	2275.43	0.957115	0	Peripherals	d__Bacteria; p__Acidobacteriota; c__Acidobacteriae; o__Subgroup_2; f__Subgroup_2; g__Subgroup_2
bASV500	1	1	0	0	0	Peripherals	d__Bacteria; p__Firmicutes; c__Bacilli; o__Bacillales; f__Bacillaceae; g__Bacillus
bASV501	29	0.379928	0.471199	-0.855298	0.191979	Peripherals	d__Bacteria; p__Actinobacteriota; c__Actinobacteria; o__Streptomycetales; f__Streptomycetaceae; g__Streptomyces
bASV502	60	0.37779	1044.7	-0.58617	0	Peripherals	d__Bacteria; p__Myxococcota; c__Polyangia; o__Haliangiales; f__Haliangiaceae; g__Haliangium; s__uncultured_Myxococcales
bASV503	13	0.348262	2038.09	-0.971446	0	Peripherals	d__Bacteria; p__Proteobacteria; c__Alphaproteobacteria; o__Rhizobiales; f__Rhizobiaceae; g__Allorhizobium-Neorhizobium-Pararhizobium-Rhizobium
bASV504	35	0.35665	2037.63	-0.807906	0	Peripherals	d__Bacteria; p__Actinobacteriota; c__Thermoleophilia; o__Gaiellales; f__uncultured; g__uncultured
bASV506	193	0.427782	271.591	0.335219	0	Peripherals	d__Bacteria; p__Proteobacteria; c__Alphaproteobacteria; o__Rhizobiales; f__Xanthobacteraceae; g__uncultured; s__Bradyrhizobium_sp.
bASV507	341	0.453093	2412.55	1.90615	0.0783007	Peripherals	d__Bacteria; p__Acidobacteriota; c__Acidobacteriae; o__Solibacterales; f__Solibacteraceae; g__Candidatus_Solibacter
bASV508	262	0.433865	1592.36	1.20546	0	Peripherals	d__Bacteria; p__Actinobacteriota; c__Thermoleophilia; o__Solirubrobacterales; f__Solirubrobacteraceae; g__Conexibacter
bASV5085	11	0.334385	0.0376952	-0.985965	0.007968	Peripherals	d__Bacteria; p__Chloroflexi; c__TK10; o__TK10; f__TK10; g__TK10
bASV509	63	0.357219	8.85402	-0.608484	0.289425	Peripherals	d__Bacteria; p__Actinobacteriota; c__Actinobacteria; o__Micrococcales; f__Micrococcaceae; g__Pseudarthrobacter
bASV5092	44	0.369949	160.673	-0.746409	0.568047	Peripherals	d__Bacteria; p__Chloroflexi; c__TK10; o__TK10; f__TK10; g__TK10
bASV51	4	0.202128	289.957	-0.258644	0	Peripherals	d__Bacteria; p__Proteobacteria; c__Gammaproteobacteria; o__Pseudomonadales; f__Pseudomonadaceae; g__Pseudomonas; s__Pseudomonas_nitroreducens
bASV510	214	0.394052	5050.94	0.779726	0	Peripherals	d__Bacteria; p__Actinobacteriota; c__Thermoleophilia; o__Gaiellales; f__Gaiellaceae; g__Gaiella; s__uncultured_Rubrobacteria
bASV5109	10	0.329085	0.53479	-0.993224	0.468301	Peripherals	d__Bacteria; p__NB1-j; c__NB1-j; o__NB1-j; f__NB1-j; g__NB1-j; s__metagenome
bASV512	286	0.448652	6922.14	1.01033	0	Peripherals	d__Bacteria; p__Proteobacteria; c__Gammaproteobacteria; o__Burkholderiales; f__SC-I-84; g__SC-I-84
bASV513	1	0.249381	0	-1.05856	0.14302	Peripherals	d__Bacteria; p__Firmicutes; c__Bacilli; o__Bacillales; f__Bacillaceae; g__Bacillus; s__Bacillus_nealsonii
bASV5136	1	0.310132	0	-1.05856	0	Peripherals	d__Bacteria; p__Planctomycetota; c__OM190; o__OM190; f__OM190; g__OM190; s__metagenome
bASV5137	18	0.35081	3.673	-0.93515	0.223273	Peripherals	d__Bacteria; p__Chloroflexi; c__TK10; o__TK10; f__TK10; g__TK10; s__uncultured_bacterium
bASV514	273	0.457	3744.6	0.91596	0.225694	Peripherals	d__Bacteria; p__Actinobacteriota; c__Acidimicrobiia; o__Microtrichales; f__Ilumatobacteraceae; g__CL500-29_marine_group; s__uncultured_Acidimicrobiaceae
bASV5145	25	0.339057	10.7908	-0.884335	0	Peripherals	d__Bacteria; p__Proteobacteria; c__Alphaproteobacteria; o__Acetobacterales; f__Acetobacteraceae; g__Roseomonas
bASV5149	6	0.313658	0	-1.02226	0	Peripherals	d__Bacteria; p__Proteobacteria; c__Alphaproteobacteria; o__Acetobacterales; f__Acetobacteraceae; g__Roseomonas
bASV515	173	0.427782	2326.48	0.190034	0.00673393	Peripherals	d__Bacteria; p__Actinobacteriota; c__Thermoleophilia; o__Gaiellales; f__Gaiellaceae; g__Gaiella; s__actinobacterium_WWH12
bASV516	19	0.32626	76.3086	-0.949817	0.0333238	Peripherals	d__Bacteria; p__Gemmatimonadota; c__Gemmatimonadetes; o__Gemmatimonadales; f__Gemmatimonadaceae
bASV5163	2	0.24564	0	-0.5	0	Peripherals	d__Bacteria; p__Firmicutes; c__Bacilli; o__Bacillales; f__Bacillaceae; g__Bacillus
bASV5170	83	0.366248	283.389	-0.382172	0	Peripherals	d__Bacteria; p__Actinobacteriota; c__Acidimicrobiia; o__Microtrichales; f__Microtrichaceae; g__uncultured
bASV5175	17	0.355078	0.616406	-0.942409	0	Peripherals	d__Bacteria; p__Actinobacteriota; c__Acidimicrobiia; o__Microtrichales; f__uncultured; g__uncultured
bASV5185	69	0.353147	197.853	-0.506345	0	Peripherals	d__Bacteria; p__Proteobacteria; c__Alphaproteobacteria; o__Rhizobiales; f__Rhizobiales_Incertae_Sedis; g__Bauldia; s__uncultured_bacterium
bASV5188	15	0.321622	7.63974	-0.985295	0	Peripherals	d__Bacteria; p__Chloroflexi; c__JG30-KF-CM66; o__JG30-KF-CM66; f__JG30-KF-CM66; g__JG30-KF-CM66
bASV519	10	0.30529	826.007	-1.02964	0	Peripherals	d__Bacteria; p__Firmicutes; c__Bacilli; o__Paenibacillales; f__Paenibacillaceae; g__Paenibacillus
bASV5191	195	0.396067	177.357	0.349738	0.125689	Peripherals	d__Bacteria; p__Actinobacteriota; c__Acidimicrobiia; o__Microtrichales; f__uncultured; g__uncultured
bASV52	1	0.14428	0	-0.994786	0	Peripherals	d__Bacteria; p__Proteobacteria; c__Alphaproteobacteria; o__Rhizobiales; f__Rhizobiaceae; g__Ochrobactrum
bASV520	221	0.440411	1427.7	0.538478	0	Peripherals	d__Bacteria; p__Actinobacteriota; c__Acidimicrobiia; o__IMCC26256; f__IMCC26256; g__IMCC26256
bASV521	74	0.387979	4264.71	-0.528632	0	Peripherals	d__Bacteria; p__Proteobacteria; c__Gammaproteobacteria; o__PLTA13; f__PLTA13; g__PLTA13; s__uncultured_gamma
bASV5214	89	0.373378	1929.23	-0.419743	0	Peripherals	d__Bacteria; p__Firmicutes; c__Clostridia; o__Clostridia; f__Gracilibacteraceae; g__Lutispora; s__uncultured_bacterium
bASV522	73	0.398654	33.2176	-0.535891	0	Peripherals	d__Bacteria; p__Proteobacteria; c__Alphaproteobacteria; o__Sphingomonadales; f__Sphingomonadaceae; g__Novosphingobium
bASV523	7	0.292988	3228.29	0.190602	0.182706	Peripherals	d__Bacteria; p__Proteobacteria; c__Gammaproteobacteria; o__Burkholderiales; f__SC-I-84; g__SC-I-84; s__uncultured_beta
bASV524	171	0.39897	5277.7	0.398339	0.293367	Peripherals	d__Bacteria; p__Proteobacteria; c__Alphaproteobacteria; o__Rhizobiales; f__Xanthobacteraceae; g__Pseudolabrys
bASV525	59	0.364064	215.16	-0.595039	0.118338	Peripherals	d__Bacteria; p__Firmicutes; c__Bacilli; o__Bacillales; f__Bacillaceae; g__Fictibacillus; s__Fictibacillus_barbaricus
bASV526	252	0.409516	200.171	1.11676	0.419067	Peripherals	d__Bacteria; p__Actinobacteriota; c__Thermoleophilia; o__Solirubrobacterales; f__Solirubrobacteraceae; g__uncultured
bASV527	3	0.201966	0	-0.504025	0	Peripherals	d__Bacteria; p__Proteobacteria; c__Gammaproteobacteria; o__Enterobacterales; f__Enterobacteriaceae
bASV528	29	0.365053	11.1452	-0.855298	0	Peripherals	d__Bacteria; p__Firmicutes; c__Bacilli; o__Bacillales; f__Bacillaceae; g__Bacillus
bASV5281	26	0.359771	0.483401	-0.877076	0	Peripherals	d__Bacteria; p__Acidobacteriota; c__Subgroup_22; o__Subgroup_22; f__Subgroup_22; g__Subgroup_22; s__uncultured_bacterium
bASV529	31	0.343862	33.1933	-0.843384	0.360576	Peripherals	d__Bacteria; p__Proteobacteria; c__Alphaproteobacteria; o__Rhizobiales; f__Xanthobacteraceae; g__Rhodoplanes
bASV530	138	0.411524	419.138	-0.0640396	0	Peripherals	d__Bacteria; p__Proteobacteria; c__Alphaproteobacteria; o__Sphingomonadales; f__Sphingomonadaceae; g__Sphingomonas
bASV531	55	0.383765	48.522	-0.666558	0	Peripherals	d__Bacteria; p__Gemmatimonadota; c__Gemmatimonadetes; o__Gemmatimonadales; f__Gemmatimonadaceae
bASV533	1	1	0	0	0.144043	Peripherals	d__Bacteria; p__Proteobacteria; c__Gammaproteobacteria; o__Pseudomonadales; f__Moraxellaceae; g__Acinetobacter
bASV534	78	0.3916	63.9821	-0.499595	0.099723	Peripherals	d__Bacteria; p__Actinobacteriota; c__Actinobacteria; o__Micrococcales; f__Micrococcaceae; g__Arthrobacter; s__Arthrobacter_globiformis
bASV535	2	0.168128	0.666667	-0.749405	0	Peripherals	d__Bacteria; p__Proteobacteria; c__Gammaproteobacteria; o__Enterobacterales; f__Erwiniaceae; g__Pantoea; s__Pantoea_rwandensis
bASV5359	4	0.201986	0	-0.258644	0	Peripherals	d__Bacteria; p__Proteobacteria; c__Gammaproteobacteria; o__Enterobacterales; f__Enterobacteriaceae; g__Escherichia-Shigella
bASV536	14	0.333554	0.0509143	-0.994165	0.0803184	Peripherals	d__Bacteria; p__Proteobacteria; c__Gammaproteobacteria; o__Burkholderiales; f__Burkholderiaceae; g__Burkholderia-Caballeronia-Paraburkholderia
bASV538	212	0.410937	120.086	0.761987	0.28197	Peripherals	d__Bacteria; p__Proteobacteria; c__Gammaproteobacteria; o__Burkholderiales; f__Burkholderiaceae; g__Burkholderia-Caballeronia-Paraburkholderia
bASV5383	120	0.414916	1761.56	-0.194706	0.0890075	Peripherals	d__Bacteria; p__Proteobacteria; c__Gammaproteobacteria; o__Nitrosococcales; f__Nitrosococcaceae; g__3PJM14; s__uncultured_bacterium
bASV54	18	0.34941	4054.64	-0.958687	0	Peripherals	d__Bacteria; p__Proteobacteria; c__Gammaproteobacteria; o__Pseudomonadales; f__Pseudomonadaceae; g__Pseudomonas
bASV540	24	0.363079	10.5124	-0.891594	0.311221	Peripherals	d__Bacteria; p__Verrucomicrobiota; c__Verrucomicrobiae; o__Pedosphaerales; f__Pedosphaeraceae; g__ADurb.Bin063-1; s__uncultured_bacterium
bASV5414	27	0.358108	64.071	-0.869817	0	Peripherals	d__Bacteria; p__Bacteroidota; c__Bacteroidia; o__Cytophagales; f__Microscillaceae; g__uncultured
bASV542	226	0.401836	87.0194	0.886159	0	Peripherals	d__Bacteria; p__Acidobacteriota; c__Acidobacteriae; o__Acidobacteriales; f__uncultured; g__uncultured
bASV5420	62	0.377366	54.5123	-0.615743	0	Peripherals	d__Bacteria; p__Actinobacteriota; c__Acidimicrobiia; o__Microtrichales; f__uncultured; g__uncultured
bASV5426	170	0.39122	363.104	0.168257	0	Peripherals	d__Bacteria; p__Bacteroidota; c__Bacteroidia; o__Bacteroidales; f__SB-5; g__SB-5; s__uncultured_bacterium
bASV543	1	0.666667	0	-0.57735	0	Peripherals	d__Bacteria; p__Proteobacteria; c__Alphaproteobacteria; o__Rhizobiales; f__Rhizobiaceae; g__Shinella
bASV544	240	0.442151	11995.6	0.676404	0	Peripherals	d__Bacteria; p__Proteobacteria; c__Alphaproteobacteria; o__Rhizobiales; f__Hyphomicrobiaceae; g__Hyphomicrobium; s__Hyphomicrobium_zavarzinii
bASV545	1	0.235225	0	-0.943539	0	Peripherals	d__Bacteria; p__Firmicutes; c__Bacilli; o__Bacillales
bASV546	264	0.439642	810.116	1.2232	0.38351	Peripherals	d__Bacteria; p__Proteobacteria; c__Alphaproteobacteria; o__Rhizobiales; f__Xanthobacteraceae; g__uncultured
bASV5460	231	0.401675	192.148	0.611071	0	Peripherals	d__Bacteria; p__Proteobacteria; c__Alphaproteobacteria; o__Elsterales; f__uncultured; g__uncultured
bASV5486	1	0.307763	0	-1.05856	0.133304	Peripherals	d__Bacteria; p__NB1-j; c__NB1-j; o__NB1-j; f__NB1-j; g__NB1-j; s__uncultured_bacterium
bASV549	144	0.391981	47.2631	0.158864	0	Peripherals	d__Bacteria; p__Actinobacteriota; c__Actinobacteria; o__Frankiales; f__Acidothermaceae; g__Acidothermus
bASV5491	26	0.324472	216.893	-0.887731	0.264514	Peripherals	d__Bacteria; p__Myxococcota; c__Polyangia; o__Polyangiales; f__Polyangiaceae; g__Minicystis
bASV55	204	0.411356	6152.45	0.691031	0	Peripherals	d__Bacteria; p__Proteobacteria; c__Alphaproteobacteria; o__Rhizobiales; f__Xanthobacteraceae; g__Bradyrhizobium
bASV550	450	0.491579	13255	2.20085	0.0347717	Peripherals	d__Bacteria; p__Acidobacteriota; c__Subgroup_5; o__Subgroup_5; f__Subgroup_5; g__Subgroup_5; s__uncultured_bacterium
bASV551	171	0.418276	2435	0.398339	0	Peripherals	d__Bacteria; p__Acidobacteriota; c__Acidobacteriae; o__Acidobacteriales; f__Acidobacteriaceae_(Subgroup_1); g__Terracidiphilus; s__uncultured_bacterium
bASV552	105	0.357346	19.7912	-0.187044	0.0557033	Peripherals	d__Bacteria; p__Proteobacteria; c__Gammaproteobacteria; o__Gammaproteobacteria_Incertae_Sedis; f__Unknown_Family; g__Acidibacter
bASV553	322	0.443417	1888.76	1.73763	0	Peripherals	d__Bacteria; p__Proteobacteria; c__Alphaproteobacteria; o__Rhizobiales; f__Hyphomicrobiaceae; g__Pedomicrobium
bASV554	181	0.424715	4244.22	0.248108	0.338331	Peripherals	d__Bacteria; p__Proteobacteria; c__Alphaproteobacteria; o__Sphingomonadales; f__Sphingomonadaceae; g__Sphingomonas
bASV5547	41	0.342984	296.6	-0.754689	0	Peripherals	d__Bacteria; p__Proteobacteria; c__Alphaproteobacteria
bASV555	289	0.44099	871.127	1.44493	0.0611012	Peripherals	d__Bacteria; p__Acidobacteriota; c__Acidobacteriae; o__Acidobacteriales; f__Acidobacteriaceae_(Subgroup_1); g__Occallatibacter
bASV556	7	0.351668	0.65463	-1.015	0	Peripherals	d__Bacteria; p__Actinobacteriota; c__Actinobacteria; o__Micrococcales; f__Micrococcaceae; g__Arthrobacter
bASV5569	195	0.396769	87.0883	0.349738	0	Peripherals	d__Bacteria; p__Proteobacteria; c__Gammaproteobacteria; o__Xanthomonadales; f__Rhodanobacteraceae; g__uncultured; s__uncultured_bacterium
bASV557	314	0.452584	4571.2	1.66667	0	Peripherals	d__Bacteria; p__Acidobacteriota; c__Acidobacteriae; o__Acidobacteriales; f__uncultured; g__uncultured; s__uncultured_Acidobacteriaceae
bASV558	5	0.253876	1486.3	0.159676	0.228532	Peripherals	d__Bacteria; p__Firmicutes; c__Bacilli; o__Paenibacillales; f__Paenibacillaceae; g__Paenibacillus
bASV5586	82	0.383473	17.0859	-0.470558	0.0670332	Peripherals	d__Bacteria; p__Actinobacteriota; c__Acidimicrobiia; o__Microtrichales
bASV559	156	0.415772	244.768	0.066627	0.203342	Peripherals	d__Bacteria; p__Actinobacteriota; c__Acidimicrobiia; o__IMCC26256; f__IMCC26256; g__IMCC26256
bASV56	1	0.666667	0	-0.57735	0	Peripherals	d__Bacteria; p__Proteobacteria; c__Alphaproteobacteria; o__Rhizobiales; f__Rhizobiaceae; g__Allorhizobium-Neorhizobium-Pararhizobium-Rhizobium
bASV560	251	0.438207	5410.61	0.756256	0.165289	Peripherals	d__Bacteria; p__Actinobacteriota; c__Actinobacteria; o__Micrococcales; f__Cellulomonadaceae; g__Cellulomonas
bASV561	79	0.391144	1177.65	-0.492336	0.287335	Peripherals	d__Bacteria; p__Proteobacteria; c__Alphaproteobacteria; o__Rhizobiales; f__Rhizobiales_Incertae_Sedis; g__Bauldia; s__metagenome
bASV562	2	0.75	0	0	0.0267808	Peripherals	d__Bacteria; p__Proteobacteria; c__Alphaproteobacteria; o__Rhizobiales; f__Rhizobiaceae; g__Allorhizobium-Neorhizobium-Pararhizobium-Rhizobium; s__Rhizobium_etli
bASV563	134	0.420372	1642.42	-0.0930766	0.23858	Peripherals	d__Bacteria; p__Chloroflexi; c__TK10; o__TK10; f__TK10; g__TK10; s__uncultured_Chloroflexi
bASV564	78	0.39084	104.557	-0.499595	0.0683396	Peripherals	d__Bacteria; p__Actinobacteriota; c__Thermoleophilia; o__Gaiellales; f__Gaiellaceae; g__Gaiella; s__uncultured_bacterium
bASV565	270	0.451165	3292.86	0.894182	0.5	Peripherals	d__Bacteria; p__Proteobacteria; c__Alphaproteobacteria; o__Rhodobacterales; f__Rhodobacteraceae; g__Amaricoccus
bASV567	29	0.375676	10.036	-0.855298	0.40526	Peripherals	d__Bacteria; p__Chloroflexi; c__Dehalococcoidia; o__S085; f__S085; g__S085; s__uncultured_bacterium
bASV568	1	1	0	0	0	Peripherals	d__Bacteria; p__Bacteroidota; c__Bacteroidia; o__Flavobacteriales; f__Flavobacteriaceae; g__Flavobacterium
bASV569	385	0.476574	10818.1	1.729	0	Peripherals	d__Bacteria; p__Bacteroidota; c__Bacteroidia; o__Cytophagales; f__Microscillaceae
bASV57	7	0.168592	6036.67	0.477497	0.380415	Peripherals	d__Bacteria; p__Proteobacteria; c__Gammaproteobacteria; o__Burkholderiales; f__Comamonadaceae; g__Delftia
bASV570	225	0.437921	3011.57	0.87729	0	Peripherals	d__Bacteria; p__Actinobacteriota; c__Actinobacteria; o__Frankiales; f__Frankiaceae; g__Jatrophihabitans; s__uncultured_bacterium
bASV5703	2	0.243826	477.365	-0.724288	0	Peripherals	d__Bacteria; p__Bacteroidota; c__Kryptonia; o__Kryptoniales; f__BSV26; g__BSV26; s__uncultured_bacterium
bASV571	16	0.335835	7.35563	-0.976426	0	Peripherals	d__Bacteria; p__Proteobacteria; c__Alphaproteobacteria; o__Micropepsales; f__Micropepsaceae; g__uncultured
bASV572	76	0.392899	65.6909	-0.514113	0	Peripherals	d__Bacteria; p__Proteobacteria; c__Alphaproteobacteria; o__Rhizobiales; f__Xanthobacteraceae; g__uncultured
bASV573	28	0.349107	1.67442	-0.869992	0.489796	Peripherals	d__Bacteria; p__Proteobacteria; c__Gammaproteobacteria; o__Burkholderiales; f__Nitrosomonadaceae; g__Ellin6067
bASV574	490	0.497284	22426.2	2.49122	0	Peripherals	d__Bacteria; p__Actinobacteriota; c__Actinobacteria; o__Frankiales; f__Sporichthyaceae; g__uncultured; s__uncultured_bacterium
bASV575	454	0.484135	7390.52	2.22988	0.438569	Peripherals	d__Bacteria; p__Proteobacteria; c__Gammaproteobacteria; o__Xanthomonadales; f__Xanthomonadaceae; g__Arenimonas
bASV5759	23	0.36158	3.28327	-0.898854	0.0895975	Peripherals	d__Bacteria; p__Bacteroidota; c__Bacteroidia; o__Sphingobacteriales; f__AKYH767; g__AKYH767; s__uncultured_bacterium
bASV576	239	0.43452	2416.09	0.669145	0	Peripherals	d__Bacteria; p__Proteobacteria; c__Gammaproteobacteria; o__Steroidobacterales; f__Steroidobacteraceae; g__uncultured
bASV577	162	0.420108	397.275	0.110183	0	Peripherals	d__Bacteria; p__Proteobacteria; c__Gammaproteobacteria; o__Burkholderiales; f__SC-I-84; g__SC-I-84
bASV5771	46	0.3621	4.47407	-0.710342	0.135634	Peripherals	d__Bacteria; p__Proteobacteria; c__Alphaproteobacteria; o__Sphingomonadales; f__Sphingomonadaceae; g__Plot4-2H12; s__uncultured_Sphingomonadaceae
bASV578	250	0.443808	19947.6	1.09903	0	Peripherals	d__Bacteria; p__Proteobacteria; c__Alphaproteobacteria; o__Rhizobiales; f__Xanthobacteraceae; g__uncultured; s__uncultured_Methylocystaceae
bASV5795	16	0.326365	0.0347644	-0.949669	0	Peripherals	d__Bacteria; p__Myxococcota; c__Myxococcia; o__Myxococcales; f__Myxococcaceae; g__KD3-10
bASV58	13	0.316617	12.8991	-1.00303	0	Peripherals	d__Bacteria; p__Firmicutes; c__Bacilli; o__Bacillales; f__Bacillaceae; g__Bacillus
bASV580	415	0.467719	2527.22	1.94677	0	Peripherals	d__Bacteria; p__Proteobacteria; c__Alphaproteobacteria; o__Rhizobiales; f__Rhizobiaceae
bASV5803	14	0.343452	18.2472	-0.964187	0	Peripherals	d__Bacteria; p__Bacteroidota; c__Bacteroidia; o__Sphingobacteriales; f__KD3-93; g__KD3-93
bASV582	550	0.502244	11861.8	2.92677	0.105675	Module hubs	d__Bacteria; p__Actinobacteriota; c__Thermoleophilia; o__Gaiellales; f__uncultured; g__uncultured
bASV5828	1	0.268605	0	-1.10947	0.162202	Peripherals	d__Bacteria; p__Acidobacteriota; c__Acidobacteriae; o__Bryobacterales; f__Bryobacteraceae; g__Bryobacter
bASV584	404	0.475112	2940.07	1.86692	0.269259	Peripherals	d__Bacteria; p__Myxococcota; c__bacteriap25; o__bacteriap25; f__bacteriap25; g__bacteriap25; s__uncultured_Syntrophobacterales
bASV585	222	0.421957	3431.96	0.545738	0.387188	Peripherals	d__Bacteria; p__Proteobacteria; c__Gammaproteobacteria; o__Burkholderiales; f__Rhodocyclaceae; g__Azovibrio; s__uncultured_bacterium
bASV586	240	0.415172	11527.9	1.01033	0	Peripherals	d__Bacteria; p__Proteobacteria; c__Gammaproteobacteria; o__Burkholderiales; f__Nitrosomonadaceae; g__mle1-7
bASV587	207	0.420108	394.512	0.717639	0.0475907	Peripherals	d__Bacteria; p__Proteobacteria; c__Alphaproteobacteria; o__Rhizobiales; f__Xanthobacteraceae; g__uncultured; s__uncultured_Pseudolabrys
bASV588	72	0.364459	213.389	-0.479736	0	Peripherals	d__Bacteria; p__Acidobacteriota; c__Acidobacteriae; o__Acidobacteriales; f__Acidobacteriaceae_(Subgroup_1)
bASV589	9	0.325943	1.24423	-1.03851	0	Peripherals	d__Bacteria; p__Proteobacteria; c__Alphaproteobacteria; o__Rhizobiales; f__Beijerinckiaceae; g__Bosea
bASV59	447	0.488124	13286.7	2.84631	0.0227243	Module hubs	d__Bacteria; p__Actinobacteriota; c__Actinobacteria; o__Frankiales; f__Acidothermaceae; g__Acidothermus
bASV590	141	0.420284	474.058	-0.0422618	0	Peripherals	d__Bacteria; p__Actinobacteriota; c__Actinobacteria; o__Propionibacteriales; f__Nocardioidaceae; g__Nocardioides
bASV591	1	0.168395	0	-0.994786	0	Peripherals	d__Bacteria; p__Proteobacteria; c__Gammaproteobacteria; o__Burkholderiales; f__Alcaligenaceae
bASV592	191	0.41483	266.166	0.320701	0.178864	Peripherals	d__Bacteria; p__Actinobacteriota; c__Thermoleophilia; o__Gaiellales; f__uncultured; g__uncultured
bASV5927	17	0.319581	1.66814	-0.967556	0.5	Peripherals	d__Bacteria; p__Verrucomicrobiota; c__Verrucomicrobiae; o__Pedosphaerales; f__Pedosphaeraceae; g__Pedosphaeraceae
bASV593	188	0.41035	2987.1	0.54912	0	Peripherals	d__Bacteria; p__Proteobacteria; c__Alphaproteobacteria; o__uncultured; f__uncultured; g__uncultured; s__uncultured_bacterium
bASV5936	302	0.424089	585.514	1.12648	0.444444	Peripherals	d__Bacteria; p__Proteobacteria; c__Gammaproteobacteria; o__Tenderiales; f__Tenderiaceae; g__Candidatus_Tenderia; s__uncultured_Chromatiaceae
bASV594	74	0.378358	112.503	-0.528632	0.385633	Peripherals	d__Bacteria; p__Actinobacteriota; c__Actinobacteria; o__Propionibacteriales; f__Nocardioidaceae; g__Nocardioides
bASV595	247	0.423198	2058.37	0.727219	0	Peripherals	d__Bacteria; p__Nitrospirota; c__Nitrospiria; o__Nitrospirales; f__Nitrospiraceae; g__Nitrospira
bASV5969	26	0.338601	1.06592	-0.877076	0.466392	Peripherals	d__Bacteria; p__Bacteroidota; c__Bacteroidia; o__Sphingobacteriales; f__env.OPS_17; g__env.OPS_17; s__uncultured_bacterium
bASV597	59	0.368392	215.772	-0.595039	0	Peripherals	d__Bacteria; p__Proteobacteria; c__Alphaproteobacteria; o__Rhizobiales; f__Rhizobiales_Incertae_Sedis; g__Nordella; s__Nordella_oligomobilis
bASV598	300	0.446365	1702.89	1.5425	0.00904959	Peripherals	d__Bacteria; p__Actinobacteriota; c__Actinobacteria; o__Frankiales; f__Acidothermaceae; g__Acidothermus
bASV6	49	0.369745	1409.5	-0.683734	0	Peripherals	d__Bacteria; p__Proteobacteria; c__Alphaproteobacteria; o__Rhizobiales; f__Xanthobacteraceae; g__Bradyrhizobium
bASV60	428	0.494597	8300.66	2.04114	0	Peripherals	d__Bacteria; p__Proteobacteria; c__Alphaproteobacteria; o__Rhizobiales; f__Xanthobacteraceae; g__uncultured; s__uncultured_Caulobacterales
bASV600	73	0.371793	5151.17	-0.535891	0	Peripherals	d__Bacteria; p__Bacteroidota; c__Bacteroidia; o__Chitinophagales; f__Chitinophagaceae; g__Terrimonas
bASV601	181	0.393667	2136.48	0.487034	0.401606	Peripherals	d__Bacteria; p__Proteobacteria; c__Alphaproteobacteria; o__Rhizobiales; f__Xanthobacteraceae; g__uncultured
bASV602	178	0.372205	149.184	0.460425	0.330105	Peripherals	d__Bacteria; p__Proteobacteria; c__Alphaproteobacteria; o__Rhizobiales; f__Xanthobacteraceae; g__uncultured
bASV6028	7	0.300552	1.11001	-1.05625	0	Peripherals	d__Bacteria; p__Acidobacteriota; c__Acidobacteriae
bASV603	150	0.411777	9063.31	0.0230715	0	Peripherals	d__Bacteria; p__Proteobacteria; c__Gammaproteobacteria; o__Gammaproteobacteria_Incertae_Sedis; f__Unknown_Family; g__Acidibacter
bASV604	415	0.475785	3415.02	1.94677	0	Peripherals	d__Bacteria; p__Actinobacteriota; c__Actinobacteria; o__Propionibacteriales; f__Propionibacteriaceae; g__Microlunatus
bASV605	142	0.378856	345.665	0.141125	0	Peripherals	d__Bacteria; p__Proteobacteria; c__Gammaproteobacteria; o__Gammaproteobacteria_Incertae_Sedis; f__Unknown_Family; g__Acidibacter
bASV6059	6	0.32369	0.108601	-1.02226	0	Peripherals	d__Bacteria; p__Bacteroidota; c__Bacteroidia; o__Sphingobacteriales; f__AKYH767; g__AKYH767; s__uncultured_Bacteroidetes
bASV606	217	0.435554	3441.73	0.509441	0	Peripherals	d__Bacteria; p__Actinobacteriota; c__Thermoleophilia; o__Solirubrobacterales; f__Solirubrobacteraceae; g__Solirubrobacter; s__uncultured_bacterium
bASV608	227	0.426966	1086.32	0.582034	0.172042	Peripherals	d__Bacteria; p__Actinobacteriota; c__Thermoleophilia; o__Gaiellales; f__uncultured; g__uncultured; s__uncultured_Rubrobacterales
bASV609	145	0.38783	4310.53	0.167734	0.0867567	Peripherals	d__Bacteria; p__Actinobacteriota; c__Thermoleophilia; o__Gaiellales
bASV61	269	0.45391	3282.28	0.886923	0	Peripherals	d__Bacteria; p__Actinobacteriota; c__Actinobacteria; o__Propionibacteriales; f__Nocardioidaceae; g__Nocardioides
bASV612	314	0.396847	814.721	1.66667	0	Peripherals	d__Bacteria; p__Actinobacteriota; c__Actinobacteria; o__Frankiales; f__Acidothermaceae; g__Acidothermus
bASV614	23	0.367921	173.276	-0.898854	0	Peripherals	d__Bacteria; p__Firmicutes; c__Bacilli; o__Bacillales; f__Bacillaceae; g__Fictibacillus
bASV617	23	0.333886	16.9338	-0.914339	0.50252	Peripherals	d__Bacteria; p__Chloroflexi; c__Dehalococcoidia; o__S085; f__S085; g__S085; s__uncultured_bacterium
bASV618	175	0.41845	1525.02	0.433817	0	Peripherals	d__Bacteria; p__Acidobacteriota; c__Acidobacteriae; o__Acidobacteriales; f__uncultured; g__uncultured
bASV619	319	0.460027	1696.68	1.71102	0	Peripherals	d__Bacteria; p__Proteobacteria; c__Alphaproteobacteria; o__Rhizobiales; f__Xanthobacteraceae; g__Rhodoplanes
bASV6195	5	0.295265	0.294538	-1.07399	0	Peripherals	d__Bacteria; p__NB1-j; c__NB1-j; o__NB1-j; f__NB1-j; g__NB1-j
bASV62	396	0.476461	6074.52	2.39397	0	Peripherals	d__Bacteria; p__Proteobacteria; c__Alphaproteobacteria; o__Rhizobiales; f__Xanthobacteraceae; g__uncultured
bASV620	270	0.444297	5988.38	1.27641	0	Peripherals	d__Bacteria; p__Proteobacteria; c__Alphaproteobacteria; o__uncultured; f__uncultured; g__uncultured; s__uncultured_Rhodospirillaceae
bASV621	225	0.424179	4084.16	0.87729	0	Peripherals	d__Bacteria; p__Acidobacteriota; c__Acidobacteriae; o__Acidobacteriales; f__Acidobacteriaceae_(Subgroup_1); g__Edaphobacter
bASV622	490	0.495084	11941.8	2.49122	0.214044	Peripherals	d__Bacteria; p__Proteobacteria; c__Alphaproteobacteria; o__Rhizobiales; f__Beijerinckiaceae; g__Microvirga
bASV6223	1	0.291715	0	-1.05856	0.5	Peripherals	d__Bacteria; p__Gemmatimonadota; c__Gemmatimonadetes; o__Gemmatimonadales; f__Gemmatimonadaceae; g__uncultured; s__uncultured_soil
bASV6226	170	0.394747	330.993	0.168257	0	Peripherals	d__Bacteria
bASV623	28	0.330164	2.24447	-0.869992	0	Peripherals	d__Bacteria; p__Actinobacteriota; c__Thermoleophilia; o__Gaiellales; f__Gaiellaceae; g__Gaiella
bASV624	240	0.397945	10279.4	1.01033	0	Peripherals	d__Bacteria; p__Proteobacteria; c__Alphaproteobacteria; o__Rhizobiales; f__Xanthobacteraceae; g__uncultured
bASV625	280	0.419671	3949.43	0.966774	0.015872	Peripherals	d__Bacteria; p__Actinobacteriota; c__Thermoleophilia; o__Solirubrobacterales; f__67-14; g__67-14; s__uncultured_bacterium
bASV626	228	0.405967	113.955	0.903898	0	Peripherals	d__Bacteria; p__Acidobacteriota; c__Acidobacteriae; o__Acidobacteriales; f__uncultured; g__uncultured
bASV627	82	0.356523	1.26497	-0.391042	0	Peripherals	d__Bacteria; p__Acidobacteriota; c__Acidobacteriae; o__Solibacterales; f__Solibacteraceae; g__Candidatus_Solibacter
bASV628	175	0.4028	6638.16	0.433817	0	Peripherals	d__Bacteria; p__Proteobacteria; c__Alphaproteobacteria; o__Rhizobiales; f__Hyphomicrobiaceae; g__Hyphomicrobium
bASV63	340	0.462563	2532.1	1.89728	0	Peripherals	d__Bacteria; p__Proteobacteria; c__Alphaproteobacteria; o__Rhizobiales; f__Xanthobacteraceae; g__uncultured
bASV630	58	0.387382	20.0012	-0.64478	0	Peripherals	d__Bacteria; p__Actinobacteriota; c__Actinobacteria; o__Propionibacteriales; f__Nocardioidaceae; g__Kribbella
bASV6308	1	0.284705	0	-1.10947	0.0662726	Peripherals	d__Bacteria; p__Actinobacteriota; c__Thermoleophilia; o__Gaiellales; f__uncultured; g__uncultured; s__metagenome
bASV631	469	0.496793	14325.3	2.33877	0.122756	Peripherals	d__Bacteria; p__Actinobacteriota; c__Thermoleophilia; o__Solirubrobacterales; f__Solirubrobacteraceae; g__Solirubrobacter; s__uncultured_Solirubrobacter
bASV6312	5	0.3072	5.64109	-0.175354	0	Peripherals	d__Bacteria; p__Verrucomicrobiota; c__Verrucomicrobiae; o__Pedosphaerales; f__Pedosphaeraceae; g__Pedosphaeraceae; s__uncultured_bacterium
bASV632	278	0.439163	1109.69	0.952256	0.0102825	Peripherals	d__Bacteria; p__Proteobacteria; c__Alphaproteobacteria; o__Rhizobiales; f__Xanthobacteraceae; g__uncultured
bASV633	42	0.38701	4.00027	-0.760928	0.453686	Peripherals	d__Bacteria; p__NB1-j; c__NB1-j; o__NB1-j; f__NB1-j; g__NB1-j
bASV634	285	0.446464	1231.69	1.00307	0	Peripherals	d__Bacteria; p__Proteobacteria; c__Alphaproteobacteria; o__Rhizobiales; f__Rhodomicrobiaceae; g__Rhodomicrobium; s__uncultured_Alphaproteobacteria
bASV6348	192	0.385528	1918.32	0.584598	0.0359161	Peripherals	d__Bacteria; p__Proteobacteria; c__Alphaproteobacteria; o__Rhizobiales
bASV635	234	0.376097	951.738	0.957115	0.0182633	Peripherals	d__Bacteria; p__Actinobacteriota; c__Actinobacteria; o__Frankiales; f__Acidothermaceae; g__Acidothermus; s__uncultured_soil
bASV637	293	0.454628	3324.38	1.06114	0	Peripherals	d__Bacteria; p__Actinobacteriota; c__Actinobacteria; o__Propionibacteriales; f__Nocardioidaceae; g__Aeromicrobium; s__uncultured_Nocardioidaceae
bASV6382	4	0.32255	0	-1.03678	0.0388197	Peripherals	d__Bacteria; p__Patescibacteria; c__Saccharimonadia; o__Saccharimonadales; f__Saccharimonadales; g__Saccharimonadales; s__uncultured_bacterium
bASV6388	25	0.347062	0.788984	-0.896601	0	Peripherals	d__Bacteria; p__Chloroflexi; c__Ktedonobacteria; o__Ktedonobacterales; f__JG30-KF-AS9; g__JG30-KF-AS9; s__uncultured_Ktedonobacterales
bASV6397	22	0.360673	0.56866	-0.906113	0	Peripherals	d__Bacteria; p__NB1-j; c__NB1-j; o__NB1-j; f__NB1-j; g__NB1-j
bASV64	459	0.488598	13242.9	2.95274	0	Module hubs	d__Bacteria; p__Proteobacteria; c__Alphaproteobacteria; o__Rhizobiales; f__Xanthobacteraceae
bASV640	116	0.411861	3060.11	-0.223743	0.046848	Peripherals	d__Bacteria; p__Proteobacteria; c__Alphaproteobacteria; o__Rhizobiales; f__Xanthobacteraceae; g__Xanthobacteraceae; s__uncultured_bacterium
bASV641	2	0.168465	0	-0.749405	0.277778	Peripherals	d__Bacteria; p__Proteobacteria; c__Gammaproteobacteria
bASV642	306	0.429791	963.931	1.59572	0.00554012	Peripherals	d__Bacteria; p__Acidobacteriota; c__Subgroup_5; o__Subgroup_5; f__Subgroup_5; g__Subgroup_5; s__uncultured_Truepera
bASV6426	3	0.270372	0.5	-0.391931	0	Peripherals	d__Bacteria; p__Firmicutes; c__Clostridia; o__Clostridiales; f__Clostridiaceae; g__Clostridium_sensu_stricto_3; s__uncultured_bacterium
bASV643	112	0.376308	2.4437	-0.124958	0.0464853	Peripherals	d__Bacteria; p__Proteobacteria; c__Gammaproteobacteria; o__Burkholderiales; f__Burkholderiaceae; g__Burkholderia-Caballeronia-Paraburkholderia
bASV644	17	0.337466	673.86	-0.967556	0.21875	Peripherals	d__Bacteria; p__Actinobacteriota; c__MB-A2-108; o__MB-A2-108; f__MB-A2-108; g__MB-A2-108
bASV646	17	0.377083	0.917933	-0.942409	0	Peripherals	d__Bacteria; p__Chloroflexi; c__Ktedonobacteria; o__C0119; f__C0119; g__C0119; s__uncultured_bacterium
bASV6469	5	0.311572	0	-1.02952	0	Peripherals	d__Bacteria; p__Actinobacteriota; c__Acidimicrobiia; o__Microtrichales
bASV649	13	0.324211	799.457	-0.971446	0.119851	Peripherals	d__Bacteria; p__Bacteroidota; c__Bacteroidia; o__Chitinophagales; f__Chitinophagaceae; g__Terrimonas
bASV65	27	0.35779	35.7325	-0.878862	0	Peripherals	d__Bacteria; p__Proteobacteria; c__Alphaproteobacteria; o__Rhizobiales; f__Xanthobacteraceae; g__uncultured
bASV650	275	0.426424	446.537	1.32076	0.410227	Peripherals	d__Bacteria; p__Chloroflexi; c__AD3; o__AD3; f__AD3; g__AD3; s__uncultured_bacterium
bASV651	288	0.423911	417.739	1.02485	0	Peripherals	d__Bacteria; p__Acidobacteriota; c__Thermoanaerobaculia; o__Thermoanaerobaculales; f__Thermoanaerobaculaceae; g__Subgroup_10
bASV652	29	0.374419	0.567939	-0.855298	0.414243	Peripherals	d__Bacteria; p__Actinobacteriota; c__Actinobacteria; o__Corynebacteriales; f__Nocardiaceae; g__Nocardia
bASV653	296	0.4407	4698.94	1.08292	0	Peripherals	d__Bacteria; p__Actinobacteriota; c__Actinobacteria; o__PeM15; f__PeM15; g__PeM15; s__uncultured_soil
bASV654	55	0.363276	402.836	-0.630517	0.1298	Peripherals	d__Bacteria; p__Firmicutes; c__Bacilli; o__Bacillales; f__Bacillaceae; g__Bacillus
bASV6545	108	0.370153	100.212	-0.160436	0	Peripherals	d__Bacteria; p__Verrucomicrobiota; c__Verrucomicrobiae; o__Pedosphaerales; f__Pedosphaeraceae; g__Pedosphaeraceae
bASV655	101	0.366582	184.163	-0.222522	0.42	Peripherals	d__Bacteria; p__Actinobacteriota; c__Acidimicrobiia
bASV6550	3	0.270699	0.0909091	-1.09173	0.493827	Peripherals	d__Bacteria; p__Gemmatimonadota; c__Gemmatimonadetes; o__Gemmatimonadales; f__Gemmatimonadaceae; g__uncultured; s__metagenome
bASV6555	18	0.331468	11.991	-0.958687	0	Peripherals	d__Bacteria; p__Actinobacteriota; c__Acidimicrobiia; o__Microtrichales
bASV656	344	0.456275	6266.34	1.93275	0	Peripherals	d__Bacteria; p__Proteobacteria; c__Alphaproteobacteria; o__Rhizobiales; f__Xanthobacteraceae
bASV657	308	0.461821	4346.81	1.17003	0	Peripherals	d__Bacteria; p__Actinobacteriota; c__Acidimicrobiia; o__Microtrichales; f__Microtrichaceae; g__uncultured
bASV658	21	0.325732	5.70582	-0.932078	0	Peripherals	d__Bacteria; p__Acidobacteriota; c__Subgroup_5; o__Subgroup_5; f__Subgroup_5; g__Subgroup_5; s__uncultured_Truepera
bASV659	190	0.391981	3529.4	0.566859	0.230845	Peripherals	d__Bacteria; p__Acidobacteriota; c__Acidobacteriae; o__Acidobacteriales; f__uncultured; g__uncultured
bASV66	6	0.326683	0	-1.02226	0	Peripherals	d__Bacteria; p__Proteobacteria; c__Alphaproteobacteria; o__Rhizobiales; f__Rhizobiaceae; g__Allorhizobium-Neorhizobium-Pararhizobium-Rhizobium
bASV6605	104	0.381873	23.6452	-0.310854	0.188366	Peripherals	d__Bacteria
bASV662	287	0.438876	1093.5	1.4272	0.0812489	Peripherals	d__Bacteria; p__Verrucomicrobiota; c__Verrucomicrobiae; o__Pedosphaerales; f__Pedosphaeraceae; g__ADurb.Bin063-1
bASV663	70	0.389932	233.577	-0.557669	0.404997	Peripherals	d__Bacteria; p__Proteobacteria; c__Gammaproteobacteria; o__Cellvibrionales; f__Halieaceae; g__OM60(NOR5)_clade; s__metagenome
bASV664	241	0.438876	10884	1.0192	0.479424	Peripherals	d__Bacteria; p__Proteobacteria; c__Gammaproteobacteria; o__JG36-TzT-191; f__JG36-TzT-191; g__JG36-TzT-191; s__uncultured_bacterium
bASV6642	1	0.291757	0	-1.05856	0	Peripherals	d__Bacteria; p__Proteobacteria; c__Alphaproteobacteria; o__Rhizobiales; f__A0839; g__A0839; s__metagenome
bASV665	287	0.455347	6777.78	1.01759	0.495027	Peripherals	d__Bacteria; p__Desulfobacterota; c__uncultured; o__uncultured; f__uncultured; g__uncultured; s__uncultured_bacterium
bASV67	9	0.335443	71209	0.968258	0.251045	Peripherals	d__Bacteria; p__Proteobacteria; c__Gammaproteobacteria; o__Enterobacterales
bASV671	125	0.375816	76.8617	-0.00965547	0	Peripherals	d__Bacteria; p__Chloroflexi; c__AD3; o__AD3; f__AD3; g__AD3; s__uncultured_bacterium
bASV672	332	0.460553	1920.64	1.82632	0	Peripherals	d__Bacteria; p__Acidobacteriota; c__Acidobacteriae; o__Acidobacteriales; f__Acidobacteriaceae_(Subgroup_1)
bASV674	5	0.293672	0	-1.07399	0.238253	Peripherals	d__Bacteria; p__Firmicutes; c__Bacilli; o__Bacillales; f__Bacillaceae; g__Bacillus
bASV675	58	0.388728	164.579	-0.64478	0	Peripherals	d__Bacteria; p__Proteobacteria; c__Alphaproteobacteria; o__Rhizobiales; f__Rhizobiaceae
bASV676	56	0.354017	405.558	-0.621648	0	Peripherals	d__Bacteria; p__Proteobacteria; c__Gammaproteobacteria; o__Xanthomonadales; f__Rhodanobacteraceae
bASV679	147	0.399445	1737.68	0.185472	0	Peripherals	d__Bacteria; p__Myxococcota; c__bacteriap25; o__bacteriap25; f__bacteriap25; g__bacteriap25
bASV68	27	0.377295	0.276305	-0.869817	0	Peripherals	d__Bacteria; p__Proteobacteria; c__Gammaproteobacteria; o__Pseudomonadales; f__Pseudomonadaceae; g__Pseudomonas
bASV680	227	0.442346	2241.21	0.895029	0.00833319	Peripherals	d__Bacteria; p__Proteobacteria; c__Alphaproteobacteria; o__Rhizobiales; f__Rhizobiales_Incertae_Sedis; g__uncultured; s__uncultured_bacterium
bASV682	346	0.440219	6906.73	1.95049	0.266824	Peripherals	d__Bacteria; p__Acidobacteriota; c__Subgroup_5; o__Subgroup_5; f__Subgroup_5; g__Subgroup_5; s__uncultured_bacterium
bASV6827	205	0.406787	355.98	0.699901	0	Peripherals	d__Bacteria; p__Myxococcota; c__Polyangia; o__mle1-27; f__mle1-27; g__mle1-27; s__uncultured_Sorangiineae
bASV683	67	0.390386	142.795	-0.579447	0	Peripherals	d__Bacteria; p__Actinobacteriota; c__Thermoleophilia; o__Solirubrobacterales; f__67-14; g__67-14
bASV685	284	0.444297	1228.04	1.40059	0	Peripherals	d__Bacteria; p__Chloroflexi; c__AD3; o__AD3; f__AD3; g__AD3; s__uncultured_bacterium
bASV686	285	0.438493	3031.38	1.40946	0.0256367	Peripherals	d__Bacteria; p__Actinobacteriota; c__Thermoleophilia; o__Gaiellales; f__uncultured; g__uncultured
bASV687	174	0.415944	633.937	0.197294	0	Peripherals	d__Bacteria; p__Proteobacteria; c__Alphaproteobacteria; o__Rhizobiales; f__Hyphomicrobiaceae; g__Pedomicrobium
bASV688	205	0.428511	7441.84	0.699901	0.00915312	Peripherals	d__Bacteria; p__Proteobacteria; c__Alphaproteobacteria; o__Rhizobiales; f__Rhizobiales_Incertae_Sedis; g__uncultured; s__uncultured_bacterium
bASV689	338	0.465127	3224.56	1.87954	0	Peripherals	d__Bacteria; p__Proteobacteria; c__Alphaproteobacteria; o__Rhizobiales; f__Xanthobacteraceae; g__uncultured
bASV69	1	0.14428	0	-0.994786	0	Peripherals	d__Bacteria; p__Proteobacteria; c__Gammaproteobacteria; o__Burkholderiales; f__Comamonadaceae
bASV690	235	0.450761	5874.17	0.640108	0.0864028	Peripherals	d__Bacteria; p__Proteobacteria; c__Alphaproteobacteria; o__Rhizobiales; f__Rhizobiaceae
bASV692	6	0.305105	8.64828	-1.02226	0	Peripherals	d__Bacteria; p__Proteobacteria; c__Gammaproteobacteria; o__Burkholderiales; f__Nitrosomonadaceae; g__Ellin6067
bASV6923	121	0.378785	29.6021	-0.187447	0.112734	Peripherals	d__Bacteria; p__Proteobacteria; c__Alphaproteobacteria
bASV6924	9	0.331686	1.28578	-1.00048	0.2408	Peripherals	d__Bacteria; p__Bdellovibrionota; c__Oligoflexia; o__0319-6G20; f__0319-6G20; g__0319-6G20
bASV694	221	0.422222	2661.13	0.841812	0	Peripherals	d__Bacteria; p__Acidobacteriota; c__Acidobacteriae; o__Subgroup_2; f__Subgroup_2; g__Subgroup_2; s__uncultured_Acidobacteria
bASV695	58	0.378216	7.93699	-0.64478	0.0768	Peripherals	d__Bacteria; p__Actinobacteriota; c__Actinobacteria; o__Micrococcales; f__Microbacteriaceae; g__Microbacterium
bASV696	489	0.485184	12083.6	2.48396	0	Peripherals	d__Bacteria; p__Actinobacteriota; c__Acidimicrobiia; o__Microtrichales; f__Ilumatobacteraceae; g__Ilumatobacteraceae; s__uncultured_bacterium
bASV697	109	0.402961	2086.06	-0.274558	0.0266618	Peripherals	d__Bacteria; p__Proteobacteria; c__Alphaproteobacteria; o__Rhizobiales; f__Amb-16S-1323; g__Amb-16S-1323; s__uncultured_bacterium
bASV698	48	0.360029	134.555	-0.692603	0	Peripherals	d__Bacteria; p__Acidobacteriota; c__Acidobacteriae; o__Solibacterales; f__Solibacteraceae; g__Candidatus_Solibacter
bASV699	186	0.438017	345.434	0.284405	0	Peripherals	d__Bacteria; p__Proteobacteria; c__Alphaproteobacteria; o__Reyranellales; f__Reyranellaceae; g__uncultured; s__uncultured_Rhodospirillales
bASV7	13	0.325521	4152.86	1.5	0.411607	Peripherals	d__Bacteria; p__Firmicutes; c__Bacilli; o__Bacillales; f__Bacillaceae; g__Bacillus
bASV70	490	0.495815	20310.8	3.22769	0	Module hubs	d__Bacteria; p__Proteobacteria; c__Alphaproteobacteria; o__Rhizobiales; f__Xanthobacteraceae; g__uncultured
bASV700	200	0.410937	332.12	0.386034	0	Peripherals	d__Bacteria; p__Proteobacteria; c__Gammaproteobacteria; o__Gammaproteobacteria_Incertae_Sedis; f__Unknown_Family; g__Acidibacter
bASV7002	26	0.352406	1.81777	-0.877076	0	Peripherals	d__Bacteria; p__Proteobacteria; c__Alphaproteobacteria; o__Kiloniellales; f__Fodinicurvataceae; g__uncultured; s__uncultured_Alphaproteobacteria
bASV702	46	0.375746	135.521	-0.731891	0	Peripherals	d__Bacteria; p__Acidobacteriota; c__Subgroup_5; o__Subgroup_5; f__Subgroup_5; g__Subgroup_5; s__uncultured_bacterium
bASV705	113	0.406294	31.6613	-0.245521	0	Peripherals	d__Bacteria; p__Proteobacteria; c__Alphaproteobacteria; o__Sphingomonadales; f__Sphingomonadaceae; g__Sphingomonas
bASV706	48	0.381006	2066.64	-0.717372	0	Peripherals	d__Bacteria; p__Desulfobacterota; c__uncultured; o__uncultured; f__uncultured; g__uncultured; s__delta_proteobacterium
bASV7078	7	0.306405	3.73503	-1.015	0	Peripherals	d__Bacteria; p__Verrucomicrobiota; c__Verrucomicrobiae; o__Pedosphaerales; f__Pedosphaeraceae; g__Pedosphaeraceae
bASV7079	70	0.371587	6.01812	-0.557669	0.0285654	Peripherals	d__Bacteria; p__Planctomycetota; c__Phycisphaerae; o__Phycisphaerales; f__Phycisphaeraceae; g__SM1A02; s__uncultured_prokaryote
bASV708	67	0.391296	2040.01	-0.579447	0	Peripherals	d__Bacteria; p__Bacteroidota; c__Bacteroidia; o__Sphingobacteriales; f__AKYH767; g__AKYH767; s__metagenome
bASV710	187	0.418885	2288.43	0.291664	0.438437	Peripherals	d__Bacteria; p__Actinobacteriota; c__Thermoleophilia; o__Gaiellales; f__Gaiellaceae; g__Gaiella
bASV711	294	0.436876	2432.25	1.48928	0	Peripherals	d__Bacteria; p__Verrucomicrobiota; c__Verrucomicrobiae; o__Pedosphaerales; f__Pedosphaeraceae; g__ADurb.Bin063-1
bASV712	61	0.375116	1.97731	-0.623002	0	Peripherals	d__Bacteria; p__Acidobacteriota; c__Acidobacteriae; o__Solibacterales; f__Solibacteraceae; g__Candidatus_Solibacter
bASV715	147	0.421427	599.923	0.00129373	0.444444	Peripherals	d__Bacteria; p__Myxococcota; c__Polyangia; o__Haliangiales; f__Haliangiaceae; g__Haliangium
bASV716	92	0.385824	3439.65	-0.302347	0	Peripherals	d__Bacteria; p__Bacteroidota; c__Bacteroidia; o__Cytophagales; f__Microscillaceae; g__Ohtaekwangia; s__uncultured_bacterium
bASV718	372	0.476236	2853.55	1.63463	0.113611	Peripherals	d__Bacteria; p__Actinobacteriota; c__Thermoleophilia; o__Solirubrobacterales; f__67-14; g__67-14; s__uncultured_Rubrobacteria
bASV72	136	0.407775	2285.33	0.0879085	0.332362	Peripherals	d__Bacteria; p__Actinobacteriota; c__Actinobacteria; o__Corynebacteriales; f__Mycobacteriaceae; g__Mycobacterium
bASV720	24	0.34504	3623.3	-0.891594	0	Peripherals	d__Bacteria; p__Chloroflexi; c__Chloroflexia; o__Chloroflexales; f__Roseiflexaceae; g__uncultured
bASV721	349	0.463415	6085.28	1.9771	0.229814	Peripherals	d__Bacteria; p__Acidobacteriota; c__Acidobacteriae; o__Subgroup_2; f__Subgroup_2; g__Subgroup_2; s__uncultured_Holophaga
bASV722	185	0.39826	6567.59	0.522512	0	Peripherals	d__Bacteria; p__Proteobacteria; c__Alphaproteobacteria; o__Rhizobiales; f__Xanthobacteraceae; g__uncultured
bASV723	1	0.260375	0	-1.10947	0	Peripherals	d__Bacteria; p__Actinobacteriota; c__Thermoleophilia; o__Gaiellales; f__uncultured; g__uncultured
bASV725	18	0.327267	2580.79	-0.958687	0	Peripherals	d__Bacteria; p__Firmicutes; c__Bacilli; o__Paenibacillales; f__Paenibacillaceae; g__Paenibacillus
bASV727	281	0.441183	816.958	0.974034	0.0493511	Peripherals	d__Bacteria; p__Actinobacteriota; c__Actinobacteria; o__Pseudonocardiales; f__Pseudonocardiaceae; g__Pseudonocardia; s__uncultured_bacterium
bASV73	66	0.38963	1092.27	-0.532953	0.056404	Peripherals	d__Bacteria; p__Proteobacteria; c__Alphaproteobacteria; o__Rhizobiales; f__Methyloligellaceae
bASV732	1	0.263302	0	-1.10947	0	Peripherals	d__Bacteria; p__RCP2-54; c__RCP2-54; o__RCP2-54; f__RCP2-54; g__RCP2-54; s__uncultured_bacterium
bASV733	45	0.35913	84.8953	-0.719212	0.157903	Peripherals	d__Bacteria; p__Nitrospirota; c__Nitrospiria; o__Nitrospirales; f__Nitrospiraceae; g__Nitrospira; s__uncultured_soil
bASV734	10	0.325837	1.0688	-1.02964	0.0352	Peripherals	d__Bacteria; p__Proteobacteria; c__Alphaproteobacteria; o__Rhizobiales; f__Devosiaceae; g__Devosia
bASV735	91	0.394747	105.764	-0.405224	0.219075	Peripherals	d__Bacteria; p__Proteobacteria; c__Alphaproteobacteria; o__Rhizobiales; f__Rhizobiaceae; g__Mesorhizobium
bASV736	51	0.380503	253.871	-0.695595	0	Peripherals	d__Bacteria; p__Actinobacteriota; c__Actinobacteria; o__Micrococcales; f__Intrasporangiaceae; g__uncultured; s__uncultured_bacterium
bASV737	46	0.382671	19.9311	-0.731891	0	Peripherals	d__Bacteria; p__Proteobacteria; c__Alphaproteobacteria; o__Rhizobiales; f__KF-JG30-B3; g__KF-JG30-B3
bASV738	54	0.380934	215.03	-0.673817	0.110727	Peripherals	d__Bacteria; p__Proteobacteria; c__Alphaproteobacteria; o__Rhizobiales; f__Rhizobiales_Incertae_Sedis; g__uncultured; s__uncultured_bacterium
bASV739	85	0.401916	492.869	-0.44878	0.209864	Peripherals	d__Bacteria; p__Chloroflexi; c__Dehalococcoidia; o__S085; f__S085; g__S085; s__uncultured_bacterium
bASV740	44	0.378287	1854.68	-0.746409	0.297521	Peripherals	d__Bacteria; p__Gemmatimonadota; c__Gemmatimonadetes; o__Gemmatimonadales; f__Gemmatimonadaceae; g__uncultured
bASV741	5	0.26183	80.4618	-0.175354	0.099723	Peripherals	d__Bacteria; p__Chloroflexi; c__Chloroflexia; o__Chloroflexales; f__Roseiflexaceae; g__uncultured; s__uncultured_bacterium
bASV742	316	0.455656	11662.5	1.68441	0.0317378	Peripherals	d__Bacteria; p__Actinobacteriota; c__Thermoleophilia; o__Gaiellales; f__uncultured; g__uncultured
bASV744	189	0.393744	9629.03	0.557989	0	Peripherals	d__Bacteria; p__Proteobacteria; c__Alphaproteobacteria; o__Rhizobiales; f__Hyphomicrobiaceae; g__Pedomicrobium
bASV745	20	0.337749	41.6551	-0.920631	0	Peripherals	d__Bacteria; p__Actinobacteriota; c__Thermoleophilia; o__Solirubrobacterales; f__Solirubrobacteraceae; g__Solirubrobacter; s__metagenome
bASV746	150	0.423198	7982.1	0.0230715	0.134048	Peripherals	d__Bacteria; p__Actinobacteriota; c__Thermoleophilia; o__Solirubrobacterales; f__67-14; g__67-14; s__uncultured_actinobacterium
bASV749	97	0.399445	1546.88	-0.361669	0	Peripherals	d__Bacteria; p__Proteobacteria; c__Alphaproteobacteria; o__Rhizobiales; f__Xanthobacteraceae; g__Pseudorhodoplanes
bASV75	1	1	0	0	0	Peripherals	d__Bacteria; p__Actinobacteriota; c__Actinobacteria; o__Corynebacteriales; f__Nocardiaceae; g__Rhodococcus
bASV750	253	0.427147	922.319	1.12563	0	Peripherals	d__Bacteria; p__Acidobacteriota; c__Acidobacteriae; o__Acidobacteriales; f__uncultured; g__uncultured
bASV751	177	0.41483	504.374	0.219071	0	Peripherals	d__Bacteria; p__Actinobacteriota; c__Actinobacteria; o__Frankiales; f__Nakamurellaceae; g__Nakamurella
bASV752	123	0.369473	656.366	-0.0273944	0	Peripherals	d__Bacteria; p__Proteobacteria; c__Alphaproteobacteria; o__Reyranellales; f__Reyranellaceae; g__Reyranella
bASV753	169	0.401275	1884.22	0.3806	0	Peripherals	d__Bacteria; p__Proteobacteria; c__Alphaproteobacteria; o__Acetobacterales; f__Acetobacteraceae; g__uncultured; s__uncultured_bacterium
bASV754	273	0.399445	1588.63	1.30302	0.105305	Peripherals	d__Bacteria; p__Proteobacteria; c__Alphaproteobacteria; o__Rhizobiales; f__Xanthobacteraceae; g__uncultured; s__uncultured_forest
bASV756	78	0.387904	485.41	-0.42652	0	Peripherals	d__Bacteria; p__Myxococcota; c__bacteriap25; o__bacteriap25; f__bacteriap25; g__bacteriap25; s__metagenome
bASV7563	24	0.333941	6.91404	-0.90547	0.422778	Peripherals	d__Bacteria; p__Bacteroidota; c__Bacteroidia; o__Sphingobacteriales; f__AKYH767; g__AKYH767; s__uncultured_bacterium
bASV757	37	0.375256	443.867	-0.797224	0.0765067	Peripherals	d__Bacteria; p__Proteobacteria; c__Alphaproteobacteria; o__Rhizobiales; f__Xanthobacteraceae; g__uncultured
bASV758	104	0.403042	432.741	-0.310854	0.145669	Peripherals	d__Bacteria; p__Bacteroidota; c__Bacteroidia; o__Sphingobacteriales; f__AKYH767; g__AKYH767
bASV759	39	0.365053	111.899	-0.772428	0.21875	Peripherals	d__Bacteria; p__Proteobacteria; c__Gammaproteobacteria; o__Burkholderiales; f__Nitrosomonadaceae; g__MND1
bASV76	1	0.287755	0	-1.05856	0.173391	Peripherals	d__Bacteria; p__Actinobacteriota; c__Actinobacteria; o__Streptomycetales; f__Streptomycetaceae; g__Streptomyces
bASV761	4	0.278754	100.836	-1.03678	0.014814	Peripherals	d__Bacteria; p__Bacteroidota; c__Bacteroidia; o__Chitinophagales; f__Chitinophagaceae
bASV762	173	0.38963	525.368	0.416078	0	Peripherals	d__Bacteria; p__Proteobacteria; c__Gammaproteobacteria; o__Burkholderiales; f__Nitrosomonadaceae; g__mle1-7
bASV764	70	0.370289	380.796	-0.497475	0	Peripherals	d__Bacteria; p__Actinobacteriota; c__Actinobacteria; o__Propionibacteriales; f__Propionibacteriaceae
bASV765	24	0.357282	5.68646	-0.891594	0	Peripherals	d__Bacteria; p__Proteobacteria; c__Alphaproteobacteria; o__Sphingomonadales; f__Sphingomonadaceae; g__Novosphingobium
bASV767	69	0.376449	93.6277	-0.506345	0	Peripherals	d__Bacteria; p__Myxococcota; c__Myxococcia; o__Myxococcales; f__Myxococcaceae; g__P3OB-42; s__uncultured_Cystobacterineae
bASV7678	167	0.393744	291.863	0.146479	0.23541	Peripherals	d__Bacteria; p__Planctomycetota; c__Phycisphaerae; o__mle1-8; f__mle1-8; g__mle1-8; s__uncultured_bacterium
bASV768	125	0.410853	41.8911	-0.15841	0	Peripherals	d__Bacteria; p__Proteobacteria; c__Gammaproteobacteria; o__Steroidobacterales; f__Steroidobacteraceae; g__Steroidobacter
bASV769	266	0.445477	4413.44	0.865145	0.170519	Peripherals	d__Bacteria; p__Chloroflexi; c__Chloroflexia; o__Chloroflexales; f__Roseiflexaceae; g__uncultured; s__uncultured_bacterium
bASV77	398	0.478498	4840.06	1.82337	0	Peripherals	d__Bacteria; p__Proteobacteria; c__Gammaproteobacteria; o__Steroidobacterales; f__Steroidobacteraceae; g__Steroidobacter
bASV770	50	0.374349	1176.27	-0.674864	0	Peripherals	d__Bacteria; p__Proteobacteria; c__Gammaproteobacteria; o__Burkholderiales; f__Burkholderiaceae; g__Burkholderia-Caballeronia-Paraburkholderia
bASV772	2	0.309513	0.144257	-1.1006	0	Peripherals	d__Bacteria; p__Proteobacteria; c__Gammaproteobacteria; o__Burkholderiales; f__Nitrosomonadaceae; g__mle1-7
bASV773	54	0.356334	717.937	-0.639386	0.0246875	Peripherals	d__Bacteria; p__Proteobacteria; c__Gammaproteobacteria; o__Burkholderiales; f__Nitrosomonadaceae; g__mle1-7
bASV774	419	0.480324	6805.38	2.59796	0.426616	Module hubs	d__Bacteria; p__RCP2-54; c__RCP2-54; o__RCP2-54; f__RCP2-54; g__RCP2-54
bASV7747	6	0.297313	1.06828	-1.06512	0	Peripherals	d__Bacteria; p__Acidobacteriota; c__Subgroup_22; o__Subgroup_22; f__Subgroup_22; g__Subgroup_22; s__uncultured_bacterium
bASV775	489	0.486709	7691.94	2.48396	0	Peripherals	d__Bacteria; p__Actinobacteriota; c__Thermoleophilia; o__Solirubrobacterales; f__Solirubrobacteraceae; g__Solirubrobacter
bASV776	106	0.388054	18.0797	-0.296336	0	Peripherals	d__Bacteria; p__Actinobacteriota; c__Actinobacteria; o__Micrococcales; f__Micrococcaceae; g__Arthrobacter; s__Arthrobacter_crystallopoietes
bASV7778	6	0.348684	0.0657762	-1.02226	0	Peripherals	d__Bacteria; p__Chloroflexi
bASV778	380	0.458665	9633.19	1.6927	0	Peripherals	d__Bacteria; p__Actinobacteriota; c__Thermoleophilia; o__Gaiellales; f__Gaiellaceae; g__Gaiella
bASV78	3	0.299792	0.46875	-1.09173	0	Peripherals	d__Bacteria; p__Proteobacteria; c__Alphaproteobacteria; o__Sphingomonadales; f__Sphingomonadaceae; g__Sphingomonas
bASV780	1	0.307904	0	-1.05856	0	Peripherals	d__Bacteria; p__Proteobacteria; c__Gammaproteobacteria; o__Burkholderiales; f__Nitrosomonadaceae; g__MND1
bASV782	344	0.461609	8505.3	1.93275	0	Peripherals	d__Bacteria; p__Acidobacteriota; c__Acidobacteriae; o__Acidobacteriales; f__uncultured; g__uncultured
bASV783	330	0.457935	6505.35	1.32974	0	Peripherals	d__Bacteria; p__Proteobacteria; c__Gammaproteobacteria; o__Burkholderiales; f__SC-I-84; g__SC-I-84
bASV7839	3	0.297182	0	-1.09173	0.509857	Peripherals	d__Bacteria; p__Myxococcota; c__Polyangia; o__Haliangiales; f__Haliangiaceae; g__Haliangium
bASV784	80	0.388353	81.1515	-0.485076	0.111226	Peripherals	d__Bacteria; p__Proteobacteria; c__Alphaproteobacteria; o__Rhizobiales; f__uncultured; g__uncultured
bASV787	7	0.31607	4.26107	-1.015	0.359862	Peripherals	d__Bacteria; p__Actinobacteriota; c__Thermoleophilia; o__Gaiellales; f__uncultured; g__uncultured; s__uncultured_Rubrobacterales
bASV788	356	0.459503	6592.32	2.03919	0.345384	Peripherals	d__Bacteria; p__Proteobacteria; c__Gammaproteobacteria; o__Burkholderiales; f__Comamonadaceae; g__uncultured
bASV789	91	0.354141	12.0539	-0.311217	0.0139853	Peripherals	d__Bacteria; p__Actinobacteriota; c__Actinobacteria; o__Streptomycetales; f__Streptomycetaceae; g__Kitasatospora
bASV79	501	0.497407	16035.6	2.57107	0.0421745	Module hubs	d__Bacteria; p__Proteobacteria; c__Alphaproteobacteria; o__Rhizobiales; f__Rhizobiales_Incertae_Sedis; g__Nordella; s__uncultured_bacterium
bASV790	2	0.168465	0	-0.749405	0.243227	Peripherals	d__Bacteria; p__Proteobacteria; c__Gammaproteobacteria
bASV791	256	0.428328	521.398	1.15224	0	Peripherals	d__Bacteria; p__Acidobacteriota; c__Acidobacteriae; o__Acidobacteriales; f__uncultured; g__uncultured
bASV792	239	0.4091	858.245	0.669145	0	Peripherals	d__Bacteria; p__Actinobacteriota; c__Actinobacteria; o__Micrococcales; f__Microbacteriaceae; g__Microbacterium
bASV794	316	0.447158	1832.78	1.68441	0	Peripherals	d__Bacteria; p__Acidobacteriota; c__Acidobacteriae; o__Bryobacterales; f__Bryobacteraceae; g__Bryobacter
bASV795	255	0.43256	334.662	1.14337	0	Peripherals	d__Bacteria; p__Actinobacteriota; c__Thermoleophilia; o__Gaiellales; f__uncultured; g__uncultured
bASV797	241	0.448153	2458.47	0.683664	0	Peripherals	d__Bacteria; p__Proteobacteria; c__Alphaproteobacteria; o__Rhizobiales; f__Xanthobacteraceae
bASV798	50	0.354702	214.652	-0.674864	0	Peripherals	d__Bacteria; p__Nitrospirota; c__Nitrospiria; o__Nitrospirales; f__Nitrospiraceae; g__Nitrospira
bASV8	16	0.362752	1768.38	-0.949669	0.136104	Peripherals	d__Bacteria; p__Firmicutes; c__Bacilli; o__Bacillales; f__Bacillaceae; g__Bacillus
bASV80	133	0.413977	1562.2	-0.100336	0.0222194	Peripherals	d__Bacteria; p__Nitrospirota; c__Nitrospiria; o__Nitrospirales; f__Nitrospiraceae; g__Nitrospira; s__uncultured_soil
bASV800	378	0.469027	4383.41	1.67818	0.0496715	Peripherals	d__Bacteria; p__Actinobacteriota; c__Thermoleophilia; o__Gaiellales; f__uncultured; g__uncultured
bASV802	167	0.389781	5689.95	0.362861	0	Peripherals	d__Bacteria; p__Actinobacteriota; c__Thermoleophilia; o__Gaiellales; f__uncultured; g__uncultured
bASV803	141	0.396457	5071.25	0.132256	0.312175	Peripherals	d__Bacteria; p__Proteobacteria; c__Gammaproteobacteria; o__Burkholderiales; f__SC-I-84; g__SC-I-84
bASV804	76	0.365916	275.089	-0.444259	0	Peripherals	d__Bacteria; p__Proteobacteria; c__Gammaproteobacteria; o__Burkholderiales; f__Nitrosomonadaceae; g__mle1-7
bASV807	23	0.372618	7.51286	-0.898854	0.249445	Peripherals	d__Bacteria; p__Proteobacteria; c__Alphaproteobacteria; o__Rhizobiales; f__Methyloligellaceae; g__Methyloligellaceae; s__uncultured_bacterium
bASV808	1	0.281639	0	-1.05856	0	Peripherals	d__Bacteria; p__Myxococcota; c__Myxococcia; o__Myxococcales; f__Anaeromyxobacteraceae; g__Anaeromyxobacter
bASV809	249	0.436592	1032.07	1.09016	0	Peripherals	d__Bacteria; p__Proteobacteria; c__Alphaproteobacteria; o__Rhizobiales; f__Xanthobacteraceae; g__uncultured; s__uncultured_forest
bASV810	275	0.448952	806.774	0.930478	0.00921639	Peripherals	d__Bacteria; p__Proteobacteria; c__Gammaproteobacteria; o__Burkholderiales; f__A21b; g__A21b
bASV811	3	0.319632	47.6693	-1.09173	0.246251	Peripherals	d__Bacteria; p__Bacteroidota; c__Bacteroidia; o__Flavobacteriales; f__Flavobacteriaceae; g__Flavobacterium
bASV812	1	0.305707	0	-1.10947	0	Peripherals	d__Bacteria; p__Bdellovibrionota; c__Oligoflexia; o__0319-6G20; f__0319-6G20; g__0319-6G20
bASV813	56	0.377578	1.38859	-0.659298	0.0170927	Peripherals	d__Bacteria; p__Proteobacteria; c__Gammaproteobacteria; o__Xanthomonadales; f__Xanthomonadaceae
bASV816	376	0.449353	4245.73	1.66366	0.0256367	Peripherals	d__Bacteria; p__Gemmatimonadota; c__Gemmatimonadetes; o__Gemmatimonadales; f__Gemmatimonadaceae; g__uncultured
bASV819	2	0.321931	0	-1.1006	0.241305	Peripherals	d__Bacteria; p__Bacteroidota; c__Bacteroidia; o__Chitinophagales; f__Saprospiraceae; g__uncultured
bASV82	73	0.39031	605.635	-0.470867	0.5	Peripherals	d__Bacteria; p__Proteobacteria; c__Alphaproteobacteria; o__Rhizobiales; f__Methyloligellaceae; g__Methyloligellaceae; s__uncultured_bacterium
bASV820	214	0.395212	4713.39	0.779726	0	Peripherals	d__Bacteria; p__Proteobacteria; c__Alphaproteobacteria; o__Rhizobiales; f__Xanthobacteraceae; g__uncultured
bASV821	85	0.391829	690.734	-0.364434	0.00858353	Peripherals	d__Bacteria; p__Actinobacteriota; c__Rubrobacteria; o__Rubrobacterales; f__Rubrobacteriaceae; g__Rubrobacter; s__metagenome
bASV822	215	0.432746	3664.74	0.494923	0.493827	Peripherals	d__Bacteria; p__Proteobacteria; c__Gammaproteobacteria; o__Burkholderiales; f__TRA3-20; g__TRA3-20
bASV824	406	0.479981	9641.7	1.88144	0	Peripherals	d__Bacteria; p__Proteobacteria; c__Alphaproteobacteria; o__Rhizobiales; f__Hyphomicrobiaceae; g__Pedomicrobium; s__uncultured_bacterium
bASV825	166	0.401755	8222.03	0.353992	0	Peripherals	d__Bacteria; p__Proteobacteria; c__Gammaproteobacteria; o__Burkholderiales; f__Nitrosomonadaceae; g__mle1-7
bASV826	313	0.456482	7751.77	1.6578	0	Peripherals	d__Bacteria; p__Actinobacteriota; c__Actinobacteria; o__Streptomycetales; f__Streptomycetaceae; g__Streptacidiphilus
bASV827	161	0.401916	10145.2	0.309645	0	Peripherals	d__Bacteria; p__Proteobacteria; c__Gammaproteobacteria; o__Gammaproteobacteria_Incertae_Sedis; f__Unknown_Family; g__Acidibacter; s__uncultured_proteobacterium
bASV828	191	0.423911	327.671	0.320701	0.00896843	Peripherals	d__Bacteria; p__Proteobacteria; c__Alphaproteobacteria; o__Rhizobiales; f__Xanthobacteraceae; g__uncultured; s__uncultured_Hyphomicrobiaceae
bASV829	296	0.463948	2992.55	1.08292	0	Peripherals	d__Bacteria; p__Actinobacteriota; c__Thermoleophilia; o__Solirubrobacterales; f__Solirubrobacteraceae; g__Solirubrobacter; s__uncultured_bacterium
bASV83	18	0.323482	11.8702	-0.958687	0	Peripherals	d__Bacteria; p__Firmicutes; c__Bacilli; o__Bacillales; f__Bacillaceae; g__Bacillus
bASV830	70	0.385528	129.987	-0.557669	0	Peripherals	d__Bacteria; p__Proteobacteria; c__Gammaproteobacteria; o__Burkholderiales; f__Nitrosomonadaceae; g__Ellin6067
bASV831	133	0.389104	1344.04	0.0613001	0	Peripherals	d__Bacteria; p__Actinobacteriota; c__Thermoleophilia; o__Gaiellales; f__uncultured; g__uncultured
bASV832	45	0.388054	975.529	-0.73915	0.293137	Peripherals	d__Bacteria; p__Actinobacteriota; c__Acidimicrobiia; o__Microtrichales; f__Ilumatobacteraceae; g__Ilumatobacteraceae; s__uncultured_bacterium
bASV833	219	0.436876	4516.08	0.824073	0	Peripherals	d__Bacteria; p__Gemmatimonadota; c__Gemmatimonadetes; o__Gemmatimonadales; f__Gemmatimonadaceae; g__Gemmatimonas
bASV834	251	0.433025	1837.96	0.756256	0	Peripherals	d__Bacteria; p__Proteobacteria; c__Gammaproteobacteria; o__Burkholderiales; f__Comamonadaceae
bASV835	25	0.365318	13.0368	-0.884335	0.0213498	Peripherals	d__Bacteria; p__Entotheonellaeota; c__Entotheonellia; o__Entotheonellales; f__Entotheonellaceae; g__Entotheonellaceae; s__uncultured_bacterium
bASV8350	84	0.377719	11.4558	-0.456039	0	Peripherals	d__Bacteria; p__Proteobacteria; c__Gammaproteobacteria; o__Nitrosococcales; f__Nitrosococcaceae
bASV836	187	0.431633	121.667	0.291664	0.514692	Peripherals	d__Bacteria; p__Proteobacteria; c__Gammaproteobacteria; o__Xanthomonadales; f__Xanthomonadaceae; g__Lysobacter
bASV837	1	1	0	0	0	Peripherals	d__Bacteria; p__Actinobacteriota; c__Actinobacteria; o__Corynebacteriales; f__Nocardiaceae; g__Rhodococcus
bASV838	363	0.460027	4217.08	2.10127	0.46195	Peripherals	d__Bacteria; p__Acidobacteriota; c__Acidobacteriae; o__Acidobacteriales; f__Acidobacteriaceae_(Subgroup_1); g__Acidipila
bASV839	8	0.296831	0.245857	-1.04738	0.0135129	Peripherals	d__Bacteria; p__Nitrospirota; c__Nitrospiria; o__Nitrospirales; f__Nitrospiraceae; g__Nitrospira
bASV84	4	0.201966	0.333333	-0.258644	0	Peripherals	d__Bacteria; p__Proteobacteria; c__Gammaproteobacteria; o__Enterobacterales
bASV843	104	0.399603	2450.84	-0.310854	0.152778	Peripherals	d__Bacteria; p__Actinobacteriota; c__Thermoleophilia; o__Gaiellales; f__uncultured; g__uncultured; s__uncultured_Rubrobacterales
bASV844	51	0.392746	13.6108	-0.695595	0	Peripherals	d__Bacteria; p__Proteobacteria; c__Alphaproteobacteria; o__Rhizobiales; f__Beijerinckiaceae; g__Bosea
bASV845	322	0.464805	36737.5	1.73763	0	Peripherals	d__Bacteria; p__Proteobacteria; c__Alphaproteobacteria; o__Rhizobiales; f__KF-JG30-B3; g__KF-JG30-B3
bASV846	309	0.465234	3105.82	1.17729	0.131211	Peripherals	d__Bacteria; p__Myxococcota; c__Polyangia; o__Nannocystales; f__Nannocystaceae; g__Pseudenhygromyxa; s__uncultured_bacterium
bASV847	67	0.384939	233.336	-0.579447	0	Peripherals	d__Bacteria; p__Chloroflexi; c__Dehalococcoidia; o__S085; f__S085; g__S085; s__metagenome
bASV848	117	0.400956	576.871	-0.0806111	0	Peripherals	d__Bacteria; p__Proteobacteria; c__Alphaproteobacteria; o__Caulobacterales; f__Hyphomonadaceae; g__SWB02; s__uncultured_bacterium
bASV85	6	0.315081	4.20075	-1.02226	0.231799	Peripherals	d__Bacteria; p__Proteobacteria; c__Gammaproteobacteria; o__Burkholderiales; f__Comamonadaceae
bASV850	223	0.402881	485.521	0.859551	0	Peripherals	d__Bacteria; p__Verrucomicrobiota; c__Verrucomicrobiae; o__Pedosphaerales; f__Pedosphaeraceae; g__ADurb.Bin063-1; s__uncultured_bacterium
bASV852	228	0.395833	246.107	0.903898	0.00439558	Peripherals	d__Bacteria; p__Actinobacteriota; c__Actinobacteria; o__Frankiales; f__Acidothermaceae; g__Acidothermus
bASV853	4	0.295959	3.17786	-1.08286	0	Peripherals	d__Bacteria; p__Proteobacteria; c__Alphaproteobacteria; o__Rhizobiales; f__Xanthobacteraceae; g__uncultured
bASV854	19	0.347421	6.14628	-0.927891	0	Peripherals	d__Bacteria; p__Acidobacteriota; c__Subgroup_5; o__Subgroup_5; f__Subgroup_5; g__Subgroup_5; s__uncultured_Truepera
bASV855	207	0.409683	1203.63	0.717639	0	Peripherals	d__Bacteria; p__Proteobacteria; c__Gammaproteobacteria; o__Burkholderiales; f__Comamonadaceae; g__uncultured
bASV856	483	0.489429	13200.7	2.4404	0	Peripherals	d__Bacteria; p__Proteobacteria; c__Gammaproteobacteria; o__Steroidobacterales; f__Steroidobacteraceae; g__uncultured; s__uncultured_gamma
bASV857	162	0.408188	5574.16	0.318514	0.258453	Peripherals	d__Bacteria; p__Actinobacteriota; c__Thermoleophilia; o__Gaiellales; f__Gaiellaceae; g__Gaiella; s__metagenome
bASV859	271	0.404093	1269.12	0.901441	0.5	Peripherals	d__Bacteria; p__Proteobacteria; c__Gammaproteobacteria; o__Burkholderiales; f__Nitrosomonadaceae; g__Ellin6067
bASV86	1	1	0	0	0.268662	Peripherals	d__Bacteria; p__Proteobacteria; c__Gammaproteobacteria; o__Enterobacterales
bASV860	114	0.362165	6.44648	-0.107219	0.21673	Peripherals	d__Bacteria; p__Verrucomicrobiota; c__Verrucomicrobiae; o__Pedosphaerales; f__Pedosphaeraceae; g__ADurb.Bin063-1; s__uncultured_bacterium
bASV8617	7	0.30423	1.17109	-1.05625	0.217248	Peripherals	d__Bacteria; p__Verrucomicrobiota; c__Verrucomicrobiae; o__Pedosphaerales; f__Pedosphaeraceae
bASV862	283	0.435648	1610.9	1.39172	0	Peripherals	d__Bacteria; p__Actinobacteriota; c__Actinobacteria; o__Frankiales; f__Acidothermaceae; g__Acidothermus; s__bacterium_Ellin334
bASV863	45	0.354203	323.708	-0.719212	0.0321458	Peripherals	d__Bacteria; p__Entotheonellaeota; c__Entotheonellia; o__Entotheonellales; f__Entotheonellaceae; g__Entotheonellaceae
bASV864	21	0.339229	26.2025	-0.932078	0	Peripherals	d__Bacteria; p__Myxococcota; c__Polyangia; o__Polyangiales; f__Phaselicystidaceae; g__Phaselicystis; s__uncultured_Polyangiaceae
bASV8653	5	0.319835	0.298279	-1.02952	0	Peripherals	d__Bacteria; p__Planctomycetota; c__Phycisphaerae; o__Phycisphaerales; f__Phycisphaeraceae; g__SM1A02; s__metagenome
bASV866	3	0.248335	588.472	-0.391931	0.102788	Peripherals	d__Bacteria; p__Firmicutes; c__Bacilli; o__Paenibacillales; f__Paenibacillaceae; g__Paenibacillus
bASV868	283	0.440797	571.721	1.39172	0	Peripherals	d__Bacteria; p__Proteobacteria; c__Alphaproteobacteria; o__Micropepsales; f__Micropepsaceae; g__uncultured; s__uncultured_bacterium
bASV869	164	0.364393	151.389	0.336253	0	Peripherals	d__Bacteria; p__Proteobacteria; c__Alphaproteobacteria; o__Reyranellales; f__Reyranellaceae; g__Reyranella
bASV871	250	0.398181	197.852	1.09903	0	Peripherals	d__Bacteria; p__Actinobacteriota; c__Actinobacteria; o__Frankiales; f__Acidothermaceae; g__Acidothermus
bASV8720	56	0.373239	12.0631	-0.659298	0.0186899	Peripherals	d__Bacteria; p__Actinobacteriota; c__Thermoleophilia; o__Gaiellales
bASV873	486	0.486239	6653.25	2.46218	0.49881	Peripherals	d__Bacteria; p__Actinobacteriota; c__Acidimicrobiia; o__Microtrichales; f__uncultured; g__uncultured
bASV874	91	0.375957	139.014	-0.405224	0.277778	Peripherals	d__Bacteria; p__Actinobacteriota; c__Actinobacteria; o__Frankiales; f__Geodermatophilaceae; g__Blastococcus
bASV875	225	0.381584	234.173	0.87729	0	Peripherals	d__Bacteria; p__Verrucomicrobiota; c__Verrucomicrobiae; o__Pedosphaerales; f__Pedosphaeraceae; g__Ellin516
bASV876	369	0.469245	5676.74	2.15449	0.380429	Peripherals	d__Bacteria; p__Proteobacteria; c__Alphaproteobacteria; o__Rhizobiales; f__Rhizobiales_Incertae_Sedis; g__Bauldia; s__uncultured_bacterium
bASV88	347	0.463521	2750.58	1.95936	0	Peripherals	d__Bacteria; p__Acidobacteriota; c__Acidobacteriae; o__Subgroup_2; f__Subgroup_2; g__Subgroup_2; s__uncultured_Acidobacteria
bASV880	520	0.499504	10136.1	2.709	0.265928	Module hubs	d__Bacteria; p__Acidobacteriota; c__Acidobacteriae; o__Bryobacterales; f__Bryobacteraceae; g__Bryobacter; s__uncultured_bacterium
bASV881	101	0.368392	368.564	-0.222522	0	Peripherals	d__Bacteria; p__Actinobacteriota; c__Thermoleophilia; o__Gaiellales; f__Gaiellaceae; g__Gaiella
bASV882	237	0.426334	737.832	0.983723	0	Peripherals	d__Bacteria; p__Actinobacteriota; c__Actinobacteria; o__Frankiales; f__Sporichthyaceae; g__uncultured; s__uncultured_bacterium
bASV883	4	0.334997	0.92966	-1.08286	0	Peripherals	d__Bacteria; p__Acidobacteriota; c__Thermoanaerobaculia; o__Thermoanaerobaculales; f__Thermoanaerobaculaceae; g__Subgroup_10
bASV884	180	0.419671	854.432	0.240849	0.0300682	Peripherals	d__Bacteria; p__Proteobacteria; c__Alphaproteobacteria; o__Rhizobiales; f__Rhizobiaceae; g__Mesorhizobium
bASV886	261	0.418624	2240.18	1.19659	0.0562907	Peripherals	d__Bacteria; p__Actinobacteriota; c__Actinobacteria; o__Frankiales; f__Acidothermaceae; g__Acidothermus; s__bacterium_Ellin5129
bASV887	372	0.472659	5423.61	1.63463	0.356505	Peripherals	d__Bacteria; p__Verrucomicrobiota; c__Verrucomicrobiae; o__Pedosphaerales; f__Pedosphaeraceae; g__Pedosphaeraceae; s__uncultured_soil
bASV888	126	0.39826	4040.87	-0.000786024	0	Peripherals	d__Bacteria; p__Chloroflexi; c__Chloroflexia; o__Chloroflexales; f__Roseiflexaceae; g__uncultured; s__uncultured_bacterium
bASV889	116	0.401836	975.238	-0.223743	0	Peripherals	d__Bacteria; p__Actinobacteriota; c__Thermoleophilia; o__Gaiellales; f__Gaiellaceae; g__Gaiella
bASV89	27	0.338431	4871.18	-0.878862	0	Peripherals	d__Bacteria; p__Proteobacteria; c__Gammaproteobacteria; o__Burkholderiales; f__Burkholderiaceae; g__Burkholderia-Caballeronia-Paraburkholderia
bASV890	325	0.451064	1321.45	1.76423	0	Peripherals	d__Bacteria; p__Proteobacteria; c__Gammaproteobacteria; o__Gammaproteobacteria_Incertae_Sedis; f__Unknown_Family; g__Acidibacter
bASV891	247	0.435365	837.308	1.07242	0	Peripherals	d__Bacteria; p__Actinobacteriota; c__Actinobacteria; o__Frankiales; f__Acidothermaceae; g__Acidothermus; s__bacterium_Ellin334
bASV894	251	0.403931	162.553	1.1079	0	Peripherals	d__Bacteria; p__Actinobacteriota; c__Thermoleophilia; o__Solirubrobacterales; f__Solirubrobacteraceae; g__Conexibacter
bASV895	51	0.359579	2343.14	-0.695595	0.221348	Peripherals	d__Bacteria; p__Actinobacteriota; c__Thermoleophilia; o__Gaiellales; f__Gaiellaceae; g__Gaiella
bASV896	460	0.494233	18188.3	2.27344	0.429183	Peripherals	d__Bacteria; p__Proteobacteria; c__Alphaproteobacteria; o__Azospirillales; f__uncultured; g__uncultured
bASV898	31	0.363866	152.428	-0.843384	0.444444	Peripherals	d__Bacteria; p__Actinobacteriota; c__Actinobacteria; o__Micrococcales; f__Intrasporangiaceae
bASV899	1	0.6	0	-1.22474	0.165289	Peripherals	d__Bacteria; p__Proteobacteria; c__Gammaproteobacteria; o__Xanthomonadales; f__Rhodanobacteraceae
bASV9	4	0.7	1	0.330719	0.32	Peripherals	d__Bacteria; p__Proteobacteria; c__Gammaproteobacteria; o__Pseudomonadales; f__Pseudomonadaceae; g__Pseudomonas
bASV90	76	0.380503	2135.83	-0.444259	0	Peripherals	d__Bacteria; p__Firmicutes; c__Bacilli; o__Bacillales; f__Bacillaceae; g__Bacillus
bASV900	286	0.451873	2904.06	1.01033	0	Peripherals	d__Bacteria; p__NB1-j; c__NB1-j; o__NB1-j; f__NB1-j; g__NB1-j; s__uncultured_Desulfoglaeba
bASV901	165	0.386713	1673.87	0.345123	0.107755	Peripherals	d__Bacteria; p__Proteobacteria; c__Gammaproteobacteria; o__Burkholderiales; f__Comamonadaceae
bASV903	151	0.370629	1970.82	0.22095	0	Peripherals	d__Bacteria; p__Proteobacteria; c__Gammaproteobacteria; o__Burkholderiales; f__A21b; g__A21b
bASV904	187	0.389179	258.936	0.54025	0.123933	Peripherals	d__Bacteria; p__Verrucomicrobiota; c__Verrucomicrobiae; o__Pedosphaerales; f__Pedosphaeraceae; g__ADurb.Bin063-1
bASV906	196	0.418972	4960.18	0.620076	0	Peripherals	d__Bacteria; p__Proteobacteria; c__Alphaproteobacteria; o__Rhizobiales; f__Beijerinckiaceae; g__FFCH5858; s__uncultured_bacterium
bASV908	334	0.459607	1817.77	1.84406	0.346276	Peripherals	d__Bacteria; p__Actinobacteriota; c__Acidimicrobiia; o__IMCC26256; f__IMCC26256; g__IMCC26256
bASV91	29	0.369473	0.359999	-0.855298	0	Peripherals	d__Bacteria; p__Proteobacteria; c__Gammaproteobacteria; o__Burkholderiales; f__Burkholderiaceae; g__Cupriavidus
bASV910	20	0.36158	8.6067	-0.920631	0	Peripherals	d__Bacteria; p__Bacteroidota; c__Bacteroidia; o__Sphingobacteriales; f__AKYH767; g__AKYH767; s__uncultured_bacterium
bASV912	122	0.38289	5219.16	-0.0362638	0	Peripherals	d__Bacteria; p__Actinobacteriota; c__Actinobacteria; o__Propionibacteriales; f__Nocardioidaceae; g__Marmoricola
bASV913	243	0.409266	114.871	1.03694	0	Peripherals	d__Bacteria; p__Actinobacteriota; c__Thermoleophilia; o__Solirubrobacterales; f__Solirubrobacteraceae; g__uncultured; s__uncultured_Conexibacteraceae
bASV914	129	0.419671	2539.33	-0.129373	0	Peripherals	d__Bacteria; p__Gemmatimonadota; c__Gemmatimonadetes; o__Gemmatimonadales; f__Gemmatimonadaceae; g__Gemmatimonas
bASV916	67	0.36927	4185.19	-0.524084	0	Peripherals	d__Bacteria; p__Actinobacteriota; c__Thermoleophilia; o__Gaiellales; f__uncultured; g__uncultured
bASV918	292	0.440604	2519.35	1.47154	0	Peripherals	d__Bacteria; p__Actinobacteriota; c__Actinobacteria; o__Catenulisporales; f__Catenulisporaceae; g__Catenulispora
bASV919	98	0.393744	114.767	-0.35441	0.32	Peripherals	d__Bacteria; p__Actinobacteriota; c__Thermoleophilia; o__Gaiellales; f__Gaiellaceae; g__Gaiella
bASV92	195	0.447257	1374.15	0.349738	0	Peripherals	d__Bacteria; p__Actinobacteriota; c__Thermoleophilia; o__Gaiellales
bASV920	1	0.244269	0	-1.05856	0.0798611	Peripherals	d__Bacteria; p__Actinobacteriota; c__Actinobacteria; o__Propionibacteriales; f__Nocardioidaceae; g__Kribbella
bASV922	9	0.34153	17.6777	-1.00048	0	Peripherals	d__Bacteria; p__Actinobacteriota; c__Thermoleophilia; o__Gaiellales; f__Gaiellaceae; g__Gaiella; s__uncultured_Acidimicrobiia
bASV923	18	0.320038	1.93023	-0.93515	0	Peripherals	d__Bacteria; p__Proteobacteria; c__Alphaproteobacteria; o__Dongiales; f__Dongiaceae; g__Dongia
bASV924	390	0.467069	3536.61	1.76529	0.0318008	Peripherals	d__Bacteria; p__Proteobacteria; c__Gammaproteobacteria; o__Gammaproteobacteria; f__Gammaproteobacteria; g__Gammaproteobacteria; s__uncultured_bacterium
bASV926	2	0.247117	37.3988	-0.667735	0.0180165	Peripherals	d__Bacteria; p__Firmicutes; c__Bacilli; o__Paenibacillales; f__Paenibacillaceae; g__Paenibacillus
bASV927	243	0.411104	349.434	0.698182	0.0728568	Peripherals	d__Bacteria; p__Actinobacteriota; c__Actinobacteria; o__Propionibacteriales; f__Nocardioidaceae; g__Nocardioides
bASV928	346	0.456689	6487.91	1.95049	0.421475	Peripherals	d__Bacteria; p__Proteobacteria; c__Gammaproteobacteria; o__JG36-TzT-191; f__JG36-TzT-191; g__JG36-TzT-191; s__uncultured_proteobacterium
bASV93	203	0.43878	5321	0.407812	0	Peripherals	d__Bacteria; p__Actinobacteriota; c__Actinobacteria; o__Propionibacteriales; f__Propionibacteriaceae; g__Microlunatus
bASV930	40	0.385972	1120.71	-0.775446	0.203672	Peripherals	d__Bacteria; p__Actinobacteriota; c__Actinobacteria; o__Frankiales; f__Sporichthyaceae; g__uncultured; s__uncultured_bacterium
[truncated: 901 more rows]

## Sheet: Table S6C
ASVID	Degree	Closeness	Betweenness	Zi	Pi	Roles	Taxonomy
bASV1000	2	0.257385	0	-0.724524	0	Peripherals	d__Bacteria; p__Acidobacteriota; c__Acidobacteriae; o__Acidobacteriales; f__uncultured; g__uncultured
bASV1001	37	0.346592	154.626	0.0378716	0	Peripherals	d__Bacteria; p__Proteobacteria; c__Alphaproteobacteria; o__Rhizobiales; f__Xanthobacteraceae; g__uncultured
bASV1003	6	0.303167	5.2154	-0.637393	0	Peripherals	d__Bacteria; p__Chloroflexi; c__AD3; o__AD3; f__AD3; g__AD3; s__uncultured_bacterium
bASV1006	1	0.284953	0	-0.711645	0.132653	Peripherals	d__Bacteria; p__Proteobacteria; c__Alphaproteobacteria; o__Rhizobiales; f__Xanthobacteraceae; g__Rhodoplanes; s__uncultured_bacterium
bASV1007	4	0.320852	17.6426	-0.530152	0	Peripherals	d__Bacteria; p__Actinobacteriota; c__Thermoleophilia; o__Solirubrobacterales; f__67-14; g__67-14
bASV1008	1	0.275342	0	-0.616811	0	Peripherals	d__Bacteria; p__Proteobacteria; c__Alphaproteobacteria; o__Rhodobacterales; f__Rhodobacteraceae; g__Amaricoccus; s__uncultured_bacterium
bASV1009	3	0.273304	3.16343	-0.702741	0	Peripherals	d__Bacteria; p__Proteobacteria; c__Alphaproteobacteria; o__uncultured; f__uncultured; g__uncultured
bASV1011	56	0.401501	1071.96	0.451743	0.375	Peripherals	d__Bacteria; p__Proteobacteria; c__Alphaproteobacteria; o__Rhizobiales; f__Xanthobacteraceae; g__Xanthobacteraceae; s__Rhizobiales_bacterium
bASV1014	4	0.279308	7.05866	-0.680958	0	Peripherals	d__Bacteria; p__Proteobacteria; c__Gammaproteobacteria; o__Burkholderiales; f__Nitrosomonadaceae; g__MND1
bASV1015	8	0.315886	1.69309	-0.414606	0	Peripherals	d__Bacteria; p__Proteobacteria; c__Alphaproteobacteria; o__Rhizobiales; f__Rhizobiaceae; g__Allorhizobium-Neorhizobium-Pararhizobium-Rhizobium
bASV1018	31	0.363232	265.809	0.249779	0.204142	Peripherals	d__Bacteria; p__Chloroflexi; c__Chloroflexia; o__Chloroflexales; f__Roseiflexaceae
bASV102	1	0.29804	0	-0.746306	0	Peripherals	d__Bacteria; p__Proteobacteria; c__Gammaproteobacteria; o__Burkholderiales; f__Burkholderiaceae; g__Burkholderia-Caballeronia-Paraburkholderia
bASV1021	44	0.373915	612.902	0.625301	0	Peripherals	d__Bacteria; p__Proteobacteria; c__Gammaproteobacteria; o__Pseudomonadales; f__Pseudomonadaceae; g__Pseudomonas; s__Pseudomonas_oryzae
bASV1022	23	0.355571	355.906	0.0186885	0	Peripherals	d__Bacteria; p__Proteobacteria; c__Alphaproteobacteria; o__Rhizobiales; f__Xanthobacteraceae; g__uncultured
bASV1023	5	0.315244	7.41558	-0.501265	0	Peripherals	d__Bacteria; p__Proteobacteria; c__Alphaproteobacteria; o__Rhizobiales; f__Rhizobiaceae; g__Mesorhizobium; s__Mesorhizobium_tamadayense
bASV1024	3	0.266632	0.916864	-0.702741	0	Peripherals	d__Bacteria; p__Acidobacteriota; c__Acidobacteriae; o__Acidobacteriales; f__uncultured; g__uncultured; s__uncultured_Acidobacteria
bASV1027	41	0.367448	187.41	0.125003	0	Peripherals	d__Bacteria; p__Acidobacteriota; c__Acidobacteriae; o__Acidobacteriales; f__uncultured; g__uncultured
bASV1030	28	0.316015	59.282	0.0684172	0	Peripherals	d__Bacteria; p__Proteobacteria; c__Gammaproteobacteria; o__Burkholderiales; f__Comamonadaceae; g__Ramlibacter
bASV1031	79	0.395562	5662.38	1.63632	0	Peripherals	d__Bacteria; p__Proteobacteria; c__Gammaproteobacteria; o__Burkholderiales; f__SC-I-84; g__SC-I-84
bASV1033	20	0.309087	331.407	-0.332435	0.166528	Peripherals	d__Bacteria; p__Acidobacteriota; c__Acidobacteriae; o__Acidobacteriales; f__uncultured; g__uncultured
bASV1034	1	0.267598	0	-0.746306	0	Peripherals	d__Bacteria; p__Acidobacteriota; c__Acidobacteriae; o__Acidobacteriales; f__uncultured; g__uncultured
bASV1035	11	0.337761	35.7318	-0.528479	0	Peripherals	d__Bacteria; p__Acidobacteriota; c__Acidobacteriae; o__Solibacterales; f__Solibacteraceae; g__Candidatus_Solibacter
bASV1038	2	0.296218	0	-0.587924	0	Peripherals	d__Bacteria; p__Proteobacteria; c__Alphaproteobacteria; o__Rhizobiales; f__Xanthobacteraceae; g__uncultured
bASV1040	12	0.344897	54.143	-0.299061	0.327168	Peripherals	d__Bacteria; p__Acidobacteriota; c__Acidobacteriae; o__Solibacterales; f__Solibacteraceae; g__Candidatus_Solibacter
bASV1045	32	0.314541	81.5167	0.183982	0	Peripherals	d__Bacteria; p__Proteobacteria; c__Alphaproteobacteria; o__Rhizobiales; f__Rhizobiaceae; g__Allorhizobium-Neorhizobium-Pararhizobium-Rhizobium; s__Rhizobium_tibeticum
bASV1048	18	0.333836	112.287	-0.125743	0	Peripherals	d__Bacteria; p__Proteobacteria; c__Gammaproteobacteria; o__Burkholderiales; f__Nitrosomonadaceae; g__Ellin6067; s__uncultured_bacterium
bASV1050	9	0.325703	3.28344	-0.480516	0.325413	Peripherals	d__Bacteria; p__Proteobacteria; c__Alphaproteobacteria; o__Rhizobiales; f__Beijerinckiaceae; g__uncultured; s__uncultured_forest
bASV1052	11	0.354839	26.1339	-0.528479	0.145429	Peripherals	d__Bacteria; p__Actinobacteriota; c__Thermoleophilia; o__Gaiellales; f__uncultured; g__uncultured
bASV106	21	0.301458	940.799	-0.0390841	0.348188	Peripherals	d__Bacteria; p__Proteobacteria; c__Gammaproteobacteria; o__Burkholderiales; f__SC-I-84; g__SC-I-84
bASV1060	4	0.316401	5.42978	-0.530152	0	Peripherals	d__Bacteria; p__Actinobacteriota; c__MB-A2-108; o__MB-A2-108; f__MB-A2-108; g__MB-A2-108; s__uncultured_bacterium
bASV1061	3	0.29571	1.56319	-0.653863	0	Peripherals	d__Bacteria; p__Proteobacteria; c__Alphaproteobacteria; o__Rhizobiales; f__Xanthobacteraceae; g__Rhodoplanes
bASV1066	40	0.343066	364.486	0.415112	0	Peripherals	d__Bacteria; p__Actinobacteriota; c__Thermoleophilia; o__Gaiellales; f__uncultured; g__uncultured
bASV1071	18	0.362637	345.624	-0.125743	0	Peripherals	d__Bacteria; p__Acidobacteriota; c__Acidobacteriae; o__Bryobacterales; f__Bryobacteraceae; g__Bryobacter
bASV1072	19	0.331127	10.0443	-0.354217	0.42	Peripherals	d__Bacteria; p__Proteobacteria; c__Alphaproteobacteria; o__Rhizobiales; f__Xanthobacteraceae; g__Bradyrhizobium
bASV1075	1	0.267598	0	-0.746306	0.156735	Peripherals	d__Bacteria; p__Proteobacteria; c__Gammaproteobacteria; o__Xanthomonadales; f__Rhodanobacteraceae; g__Rhodanobacter; s__uncultured_Xanthomonadaceae
bASV1080	7	0.309766	2.74929	-0.61561	0	Peripherals	d__Bacteria; p__Actinobacteriota; c__Actinobacteria; o__Streptomycetales; f__Streptomycetaceae; g__Streptacidiphilus; s__Streptacidiphilus_sp.
bASV1082	40	0.345742	215.364	0.10322	0.572246	Peripherals	d__Bacteria; p__Acidobacteriota; c__Acidobacteriae; o__Bryobacterales; f__Bryobacteraceae; g__Bryobacter
bASV1083	26	0.3347	55.7174	0.105347	0	Peripherals	d__Bacteria; p__Chloroflexi; c__Chloroflexia; o__Chloroflexales; f__Roseiflexaceae; g__uncultured; s__uncultured_bacterium
bASV1087	3	0.301165	0.303243	-0.653863	0	Peripherals	d__Bacteria; p__Proteobacteria; c__Alphaproteobacteria; o__uncultured; f__uncultured; g__uncultured
bASV109	20	0.3	454.561	-0.0679705	0	Peripherals	d__Bacteria; p__Proteobacteria; c__Alphaproteobacteria; o__Rhizobiales; f__Hyphomicrobiaceae; g__Pedomicrobium
bASV1094	16	0.332405	777.499	-0.419565	0.162628	Peripherals	d__Bacteria; p__Proteobacteria; c__Alphaproteobacteria; o__Rhizobiales; f__Xanthobacteraceae; g__Xanthobacteraceae; s__Rhizobiales_bacterium
bASV110	19	0.299594	625.575	-0.0968568	0.389838	Peripherals	d__Bacteria; p__Proteobacteria; c__Gammaproteobacteria; o__Gammaproteobacteria_Incertae_Sedis; f__Unknown_Family; g__Acidibacter
bASV1100	1	0.291596	0	-0.746306	0.242436	Peripherals	d__Bacteria; p__Acidobacteriota; c__Acidobacteriae; o__Solibacterales; f__Solibacteraceae; g__Candidatus_Solibacter
bASV1101	30	0.332191	56.9603	-0.114607	0	Peripherals	d__Bacteria; p__Verrucomicrobiota; c__Verrucomicrobiae; o__Pedosphaerales; f__Pedosphaeraceae; g__Ellin516; s__uncultured_bacterium
bASV1102	63	0.395059	1890.35	1.17414	0	Peripherals	d__Bacteria; p__Actinobacteriota; c__Acidimicrobiia; o__Microtrichales; f__Ilumatobacteraceae
bASV1104	1	0.275342	0	-0.616811	0.375	Peripherals	d__Bacteria; p__Gemmatimonadota; c__Gemmatimonadetes; o__Gemmatimonadales; f__Gemmatimonadaceae; g__Gemmatimonas
bASV1105	6	0.333764	1.08997	-0.472379	0.0798611	Peripherals	d__Bacteria; p__Bacteroidota; c__Bacteroidia; o__Flavobacteriales; f__Flavobacteriaceae; g__Flavobacterium; s__Flavobacterium_cauense
bASV1107	2	0.252606	1.76629	-0.587924	0	Peripherals	d__Bacteria; p__Desulfobacterota; c__Desulfuromonadia; o__Geobacterales; f__Geobacteraceae
bASV1109	22	0.330845	18.8433	-0.288869	0	Peripherals	d__Bacteria; p__Verrucomicrobiota; c__Verrucomicrobiae; o__Pedosphaerales; f__Pedosphaeraceae; g__Pedosphaera; s__uncultured_bacterium
bASV111	9	0.297583	125.973	-0.38572	0	Peripherals	d__Bacteria; p__Proteobacteria; c__Alphaproteobacteria; o__Rhizobiales; f__Methyloligellaceae
bASV1113	15	0.302575	18.6125	-0.307169	0.152778	Peripherals	d__Bacteria; p__Acidobacteriota; c__Acidobacteriae; o__Solibacterales; f__Solibacteraceae; g__Candidatus_Solibacter
bASV1115	8	0.324477	6.25928	-0.593827	0.0469769	Peripherals	d__Bacteria; p__Proteobacteria; c__Gammaproteobacteria; o__Burkholderiales; f__Nitrosomonadaceae; g__mle1-7; s__uncultured_Rhodocyclaceae
bASV1117	29	0.328602	43.7705	-0.13639	0	Peripherals	d__Bacteria; p__Proteobacteria; c__Alphaproteobacteria; o__Rhizobiales; f__Beijerinckiaceae; g__Roseiarcus; s__uncultured_bacterium
bASV112	4	0.291104	180.563	-0.530152	0	Peripherals	d__Bacteria; p__Actinobacteriota; c__MB-A2-108; o__MB-A2-108; f__MB-A2-108; g__MB-A2-108
bASV1123	25	0.329299	19.018	-0.223521	0.267562	Peripherals	d__Bacteria; p__Acidobacteriota; c__Acidobacteriae; o__Bryobacterales; f__Bryobacteraceae; g__Bryobacter; s__uncultured_Acidobacteria
bASV113	49	0.389894	6917.05	0.769733	0	Peripherals	d__Bacteria; p__Actinobacteriota; c__Actinobacteria; o__Micrococcales; f__Microbacteriaceae; g__Agromyces
bASV1133	7	0.322654	12.7736	-0.443493	0	Peripherals	d__Bacteria; p__Proteobacteria; c__Alphaproteobacteria; o__Rhodobacterales; f__Rhodobacteraceae; g__Amaricoccus
bASV114	25	0.348148	3367.12	0.0764612	0	Peripherals	d__Bacteria; p__Proteobacteria; c__Alphaproteobacteria; o__Dongiales; f__Dongiaceae; g__Dongia
bASV1142	25	0.350508	28.6304	0.0764612	0	Peripherals	d__Bacteria; p__Actinobacteriota; c__Actinobacteria; o__Micrococcales; f__Intrasporangiaceae; g__Intrasporangium
bASV1147	40	0.363658	679.365	0.10322	0	Peripherals	d__Bacteria; p__Acidobacteriota; c__Acidobacteriae; o__Subgroup_2; f__Subgroup_2; g__Subgroup_2
bASV115	44	0.38515	4939.29	0.625301	0	Peripherals	d__Bacteria; p__Actinobacteriota; c__MB-A2-108; o__MB-A2-108; f__MB-A2-108; g__MB-A2-108
bASV1151	47	0.368321	493.368	0.71196	0.0644444	Peripherals	d__Bacteria; p__Actinobacteriota; c__Actinobacteria; o__Micrococcales; f__Microbacteriaceae; g__Agromyces
bASV1158	6	0.334267	1.66879	-0.472379	0	Peripherals	d__Bacteria; p__Actinobacteriota; c__Actinobacteria; o__Pseudonocardiales; f__Pseudonocardiaceae; g__Pseudonocardia
bASV1159	7	0.3	0.891389	-0.538298	0	Peripherals	d__Bacteria; p__Proteobacteria; c__Alphaproteobacteria; o__Rhizobiales; f__Rhizobiaceae; g__Allorhizobium-Neorhizobium-Pararhizobium-Rhizobium
bASV116	27	0.369462	879.333	0.039526	0	Peripherals	d__Bacteria; p__Proteobacteria; c__Alphaproteobacteria; o__Rhizobiales; f__Xanthobacteraceae; g__uncultured
bASV1161	31	0.374728	177.818	0.249779	0	Peripherals	d__Bacteria; p__Proteobacteria; c__Gammaproteobacteria; o__Cellvibrionales; f__Spongiibacteraceae; g__BD1-7_clade; s__uncultured_soil
bASV1164	1	0.303701	0	-0.746306	0	Peripherals	d__Bacteria; p__Acidobacteriota; c__Acidobacteriae; o__Acidobacteriales; f__uncultured; g__uncultured
bASV1165	2	0.290395	0	-0.682754	0.0644444	Peripherals	d__Bacteria; p__Proteobacteria; c__Alphaproteobacteria; o__Rhizobiales; f__Xanthobacteraceae; g__uncultured
bASV1167	7	0.343446	80.9671	-0.443493	0.173828	Peripherals	d__Bacteria; p__Actinobacteriota; c__Thermoleophilia; o__Gaiellales; f__Gaiellaceae; g__Gaiella; s__uncultured_bacterium
bASV1169	2	0.305255	1.80293	-0.587924	0	Peripherals	d__Bacteria; p__Proteobacteria; c__Gammaproteobacteria; o__Burkholderiales; f__TRA3-20; g__TRA3-20; s__uncultured_beta
bASV117	1	0.251255	0	-0.711645	0.244521	Peripherals	d__Bacteria; p__Proteobacteria; c__Alphaproteobacteria; o__Rhizobiales; f__Methyloligellaceae; g__uncultured; s__uncultured_Rhodobium
bASV1172	1	0.30382	0	-0.616811	0.0866813	Peripherals	d__Bacteria; p__Actinobacteriota; c__Actinobacteria; o__Micrococcales; f__Intrasporangiaceae; g__uncultured; s__uncultured_bacterium
bASV1175	6	0.332904	1.44746	-0.637393	0	Peripherals	d__Bacteria; p__Proteobacteria; c__Alphaproteobacteria; o__Rhizobiales; f__Hyphomicrobiaceae; g__Hyphomicrobium
bASV1177	47	0.359111	1552.19	0.255699	0	Peripherals	d__Bacteria; p__Proteobacteria; c__Alphaproteobacteria; o__uncultured; f__uncultured; g__uncultured
bASV1178	2	0.301399	0	-0.724524	0.425078	Peripherals	d__Bacteria; p__Proteobacteria; c__Alphaproteobacteria; o__Rhizobiales; f__Beijerinckiaceae; g__Roseiarcus; s__uncultured_bacterium
bASV1179	1	0.313841	0	-0.746306	0	Peripherals	d__Bacteria; p__Acidobacteriota; c__Acidobacteriae; o__Acidobacteriales; f__uncultured; g__uncultured
bASV118	45	0.324409	7782.6	0.654188	0.137174	Peripherals	d__Bacteria; p__Actinobacteriota; c__Acidimicrobiia; o__Microtrichales; f__Ilumatobacteraceae; g__Ilumatobacter
bASV1182	5	0.312828	2.73779	-0.659175	0	Peripherals	d__Bacteria; p__Proteobacteria; c__Alphaproteobacteria; o__Micropepsales; f__Micropepsaceae; g__uncultured; s__uncultured_Alphaproteobacteria
bASV1183	37	0.345511	228.366	0.0378716	0	Peripherals	d__Bacteria; p__Proteobacteria; c__Gammaproteobacteria; o__Burkholderiales; f__A21b; g__A21b
bASV1184	24	0.306401	62.2639	-0.0471476	0	Peripherals	d__Bacteria; p__Desulfobacterota; c__uncultured; o__uncultured; f__uncultured; g__uncultured
bASV1185	6	0.307677	5.59515	-0.637393	0.10108	Peripherals	d__Bacteria; p__Proteobacteria; c__Alphaproteobacteria; o__Rhizobiales; f__Xanthobacteraceae; g__Bradyrhizobium
bASV119	14	0.332191	2022.17	-0.241288	0	Peripherals	d__Bacteria; p__Proteobacteria; c__Gammaproteobacteria; o__Burkholderiales; f__Sutterellaceae; g__uncultured
bASV1190	11	0.354514	37.5809	-0.422733	0	Peripherals	d__Bacteria; p__Proteobacteria; c__Alphaproteobacteria; o__Rhizobiales; f__Rhizobiaceae; g__Allorhizobium-Neorhizobium-Pararhizobium-Rhizobium; s__Rhizobium_taeanense
bASV1193	24	0.329229	47.6847	-0.245304	0	Peripherals	d__Bacteria; p__Acidobacteriota; c__Acidobacteriae; o__Subgroup_2; f__Subgroup_2; g__Subgroup_2; s__uncultured_Holophaga
bASV1194	39	0.313904	175.625	0.386221	0	Peripherals	d__Bacteria; p__Actinobacteriota; c__Thermoleophilia; o__Gaiellales; f__uncultured; g__uncultured
bASV1195	1	0.265947	0	-0.711645	0	Peripherals	d__Bacteria; p__Proteobacteria; c__Gammaproteobacteria
bASV1197	51	0.394857	2384.52	0.34283	0	Peripherals	d__Bacteria; p__Proteobacteria; c__Alphaproteobacteria; o__Acetobacterales; f__Acetobacteraceae; g__uncultured
bASV1198	1	0.263149	0	-0.711645	0.440089	Peripherals	d__Bacteria; p__Proteobacteria; c__Gammaproteobacteria; o__Burkholderiales; f__Nitrosomonadaceae; g__mle1-7
bASV120	27	0.349403	467.836	-0.179956	0	Peripherals	d__Bacteria; p__Acidobacteriota; c__Acidobacteriae; o__Subgroup_2; f__Subgroup_2; g__Subgroup_2; s__uncultured_Acidobacteria
bASV1203	22	0.333333	14.316	-0.288869	0.216176	Peripherals	d__Bacteria; p__Acidobacteriota; c__Acidobacteriae; o__Solibacterales; f__Solibacteraceae; g__Candidatus_Solibacter
bASV1207	2	0.277609	5.64807	-0.587924	0.48	Peripherals	d__Bacteria; p__Gemmatimonadota; c__Gemmatimonadetes; o__Gemmatimonadales; f__Gemmatimonadaceae; g__uncultured
bASV121	4	0.325977	0.443209	-0.624972	0.235537	Peripherals	d__Bacteria; p__Actinobacteriota; c__Acidimicrobiia; o__IMCC26256; f__IMCC26256; g__IMCC26256
bASV1212	39	0.373825	693.692	0.386221	0.222725	Peripherals	d__Bacteria; p__Gemmatimonadota; c__Gemmatimonadetes; o__Gemmatimonadales; f__Gemmatimonadaceae; g__Gemmatimonas
bASV1215	18	0.340655	26.1421	-0.125743	0.244898	Peripherals	d__Bacteria; p__Gemmatimonadota; c__Gemmatimonadetes; o__Gemmatimonadales; f__Gemmatimonadaceae; g__uncultured
bASV1216	18	0.345357	24.313	-0.125743	0.277778	Peripherals	d__Bacteria; p__Proteobacteria; c__Gammaproteobacteria; o__Xanthomonadales; f__Xanthomonadaceae; g__Lysobacter; s__Lysobacter_yangpyeongensis
bASV122	18	0.350746	471.192	-0.125743	0.117122	Peripherals	d__Bacteria; p__Actinobacteriota; c__Actinobacteria; o__Propionibacteriales; f__Nocardioidaceae; g__Nocardioides
bASV1221	84	0.349482	2327.81	1.68633	0	Peripherals	d__Bacteria; p__Proteobacteria; c__Alphaproteobacteria; o__Rhizobiales; f__Xanthobacteraceae
bASV1224	5	0.33269	0.867282	-0.501265	0.231111	Peripherals	d__Bacteria; p__Chloroflexi; c__TK10; o__TK10; f__TK10; g__TK10
bASV1226	56	0.361623	3393.94	0.451743	0.0739645	Peripherals	d__Bacteria; p__Acidobacteriota; c__Acidobacteriae; o__Acidobacteriales; f__Koribacteraceae; g__Candidatus_Koribacter; s__uncultured_bacterium
bASV1228	31	0.353062	482.573	-0.0928247	0	Peripherals	d__Bacteria; p__Proteobacteria; c__Alphaproteobacteria; o__Micropepsales; f__Micropepsaceae; g__uncultured
bASV1232	10	0.331694	1.97673	-0.356834	0.226562	Peripherals	d__Bacteria; p__Acidobacteriota; c__Subgroup_5; o__Subgroup_5; f__Subgroup_5; g__Subgroup_5; s__uncultured_bacterium
bASV1233	1	0.267552	0	-0.746306	0	Peripherals	d__Bacteria; p__Proteobacteria; c__Alphaproteobacteria; o__Rhizobiales; f__Xanthobacteraceae; g__uncultured
bASV1235	11	0.333477	8.38261	-0.327947	0.209751	Peripherals	d__Bacteria; p__Actinobacteriota; c__Thermoleophilia; o__Gaiellales; f__Gaiellaceae; g__Gaiella
bASV1237	22	0.330845	9.23472	-0.288869	0	Peripherals	d__Bacteria; p__Gemmatimonadota; c__Gemmatimonadetes; o__Gemmatimonadales; f__Gemmatimonadaceae; g__uncultured; s__uncultured_Gemmatimonadetes
bASV124	35	0.374366	7488.98	0.365324	0	Peripherals	d__Bacteria; p__Actinobacteriota; c__Thermoleophilia; o__Gaiellales; f__uncultured; g__uncultured; s__uncultured_prokaryote
bASV1240	5	0.326458	2.41794	-0.501265	0.335	Peripherals	d__Bacteria; p__Myxococcota; c__bacteriap25; o__bacteriap25; f__bacteriap25; g__bacteriap25; s__uncultured_soil
bASV1241	10	0.317698	1.39469	-0.550262	0.223608	Peripherals	d__Bacteria; p__Verrucomicrobiota; c__Verrucomicrobiae; o__Pedosphaerales; f__Pedosphaeraceae; g__ADurb.Bin063-1; s__uncultured_bacterium
bASV1243	51	0.39236	1370.42	0.34283	0	Peripherals	d__Bacteria; p__Planctomycetota; c__vadinHA49; o__vadinHA49; f__vadinHA49; g__vadinHA49; s__uncultured_Planctomycetaceae
bASV1244	1	0.254889	0	-0.616811	0	Peripherals	d__Bacteria; p__Proteobacteria; c__Gammaproteobacteria; o__Steroidobacterales; f__Steroidobacteraceae; g__uncultured
bASV1249	6	0.325635	14.4854	-0.472379	0	Peripherals	d__Bacteria; p__Acidobacteriota; c__Acidobacteriae; o__Acidobacteriae; f__Acidobacteriae; g__Paludibaculum; s__metagenome
bASV125	22	0.30376	970.248	-0.0101978	0	Peripherals	d__Bacteria; p__Actinobacteriota; c__Thermoleophilia; o__Solirubrobacterales; f__Solirubrobacteraceae; g__Solirubrobacter; s__metagenome
bASV1259	1	0.303701	0	-0.616811	0	Peripherals	d__Bacteria; p__Proteobacteria; c__Gammaproteobacteria; o__Xanthomonadales; f__Rhodanobacteraceae; g__Ahniella; s__uncultured_Xanthomonadaceae
bASV126	35	0.334845	452.775	-0.0056938	0	Peripherals	d__Bacteria; p__Chloroflexi; c__TK10; o__TK10; f__TK10; g__TK10
bASV1260	2	0.290286	0.148131	-0.724524	0.0806648	Peripherals	d__Bacteria; p__Proteobacteria; c__Gammaproteobacteria; o__Xanthomonadales; f__Rhodanobacteraceae
bASV1262	20	0.358281	68.4688	-0.162712	0.211457	Peripherals	d__Bacteria; p__Proteobacteria; c__Alphaproteobacteria; o__Rhizobiales; f__Rhizobiales_Incertae_Sedis; g__Bauldia; s__uncultured_bacterium
bASV1264	21	0.320852	7.71407	-0.310652	0.5	Peripherals	d__Bacteria; p__Acidobacteriota; c__Acidobacteriae; o__Acidobacteriales; f__uncultured; g__uncultured
bASV1265	1	0.267598	0	-0.746306	0	Peripherals	d__Bacteria; p__Acidobacteriota; c__Acidobacteriae; o__Subgroup_2; f__Subgroup_2; g__Subgroup_2; s__uncultured_Acidobacteria
bASV127	38	0.364684	458.881	0.357329	0	Peripherals	d__Bacteria; p__Actinobacteriota; c__Acidimicrobiia; o__IMCC26256; f__IMCC26256; g__IMCC26256; s__uncultured_Ferrimicrobium
bASV1270	28	0.322856	72.1617	-0.158173	0	Peripherals	d__Bacteria; p__Acidobacteriota; c__Acidobacteriae; o__Acidobacteriales; f__Koribacteraceae; g__Candidatus_Koribacter; s__uncultured_bacterium
bASV1277	8	0.302162	17.67	-0.509407	0.0363512	Peripherals	d__Bacteria; p__Acidobacteriota; c__Acidobacteriae; o__Acidobacteriales; f__uncultured; g__uncultured
bASV128	17	0.299305	324.609	-0.154629	0	Peripherals	d__Bacteria; p__Desulfobacterota; c__uncultured; o__uncultured; f__uncultured; g__uncultured; s__metagenome
bASV1288	6	0.311884	0.737358	-0.472379	0	Peripherals	d__Bacteria; p__Proteobacteria; c__Alphaproteobacteria; o__Sphingomonadales; f__Sphingomonadaceae; g__Sphingomonas; s__Sphingomonas_soli
bASV1289	14	0.322654	1646.96	-0.241288	0.297521	Peripherals	d__Bacteria; p__Actinobacteriota; c__Actinobacteria; o__Micrococcales; f__Micrococcaceae; g__Pseudarthrobacter; s__Pseudarthrobacter_defluvii
bASV129	55	0.402126	3783.75	0.943051	0	Peripherals	d__Bacteria; p__Proteobacteria; c__Alphaproteobacteria; o__Sphingomonadales; f__Sphingomonadaceae; g__Sphingomonas
bASV1294	2	0.303939	7.793	-0.587924	0	Peripherals	d__Bacteria; p__Actinobacteriota; c__Thermoleophilia; o__Gaiellales; f__uncultured; g__uncultured
bASV1300	1	0.30382	0	-0.616811	0.277778	Peripherals	d__Bacteria; p__Chloroflexi; c__Chloroflexia; o__Chloroflexales; f__Roseiflexaceae; g__uncultured; s__uncultured_Chloroflexi
bASV1301	28	0.348853	140.779	0.16312	0	Peripherals	d__Bacteria; p__Proteobacteria; c__Gammaproteobacteria; o__Burkholderiales; f__Nitrosomonadaceae; g__Ellin6067
bASV1305	45	0.39526	657.499	0.212133	0	Peripherals	d__Bacteria; p__Acidobacteriota; c__Subgroup_5; o__Subgroup_5; f__Subgroup_5; g__Subgroup_5
bASV1307	2	0.269177	0.722161	-0.724524	0	Peripherals	d__Bacteria; p__Acidobacteriota; c__Acidobacteriae; o__Acidobacteriales; f__Acidobacteriaceae_(Subgroup_1); g__Occallatibacter
bASV1308	2	0.267691	0.23871	-0.724524	0	Peripherals	d__Bacteria; p__Acidobacteriota; c__Acidobacteriae; o__Acidobacteriales; f__Acidobacteriaceae_(Subgroup_1); g__uncultured
bASV131	21	0.347914	1179.04	-0.0390841	0.30437	Peripherals	d__Bacteria; p__Actinobacteriota; c__Thermoleophilia; o__Solirubrobacterales; f__67-14; g__67-14
bASV1312	29	0.344437	36.4977	-0.13639	0	Peripherals	d__Bacteria; p__RCP2-54; c__RCP2-54; o__RCP2-54; f__RCP2-54; g__RCP2-54; s__uncultured_bacterium
bASV1316	5	0.314604	0.335125	-0.659175	0	Peripherals	d__Bacteria; p__Acidobacteriota; c__Acidobacteriae; o__Acidobacteriales; f__Acidobacteriaceae_(Subgroup_1); g__Edaphobacter
bASV1318	80	0.402962	5231.86	1.66521	0	Peripherals	d__Bacteria; p__Actinobacteriota; c__Actinobacteria; o__Micrococcales; f__Microbacteriaceae; g__Agromyces
bASV1319	29	0.349482	369.406	0.192006	0.444444	Peripherals	d__Bacteria; p__Bacteroidota; c__Bacteroidia; o__Cytophagales; f__Hymenobacteraceae; g__Adhaeribacter
bASV132	34	0.334845	437.688	-0.0274765	0	Peripherals	d__Bacteria; p__Proteobacteria; c__Alphaproteobacteria; o__Rhizobiales; f__Xanthobacteraceae; g__uncultured; s__uncultured_Pseudolabrys
bASV1322	3	0.297411	0.361116	-0.653863	0.0907029	Peripherals	d__Bacteria; p__Acidobacteriota; c__Subgroup_11; o__Subgroup_11; f__Subgroup_11; g__Subgroup_11; s__uncultured_bacterium
bASV1329	47	0.365199	276.714	0.71196	0.4864	Peripherals	d__Bacteria; p__Actinobacteriota; c__MB-A2-108; o__MB-A2-108; f__MB-A2-108; g__MB-A2-108; s__uncultured_bacterium
bASV133	34	0.384577	4344.4	0.336438	0	Peripherals	d__Bacteria; p__Proteobacteria; c__Alphaproteobacteria; o__Rhizobiales; f__Xanthobacteraceae; g__Pseudorhodoplanes
bASV1331	4	0.320587	0.293994	-0.530152	0	Peripherals	d__Bacteria; p__Gemmatimonadota; c__Gemmatimonadetes; o__Gemmatimonadales; f__Gemmatimonadaceae
bASV1335	1	0.236902	0	-0.746306	0	Peripherals	d__Bacteria; p__Acidobacteriota; c__Acidobacteriae; o__Bryobacterales; f__Bryobacteraceae; g__Bryobacter
bASV1336	9	0.332618	1620.06	-0.38572	0	Peripherals	d__Bacteria; p__Actinobacteriota; c__Thermoleophilia; o__Gaiellales; f__Gaiellaceae; g__Gaiella
bASV134	6	0.290558	27.5566	-0.472379	0	Peripherals	d__Bacteria; p__Actinobacteriota; c__Thermoleophilia; o__Gaiellales; f__Gaiellaceae; g__Gaiella
bASV1342	13	0.333262	6.10127	-0.270175	0	Peripherals	d__Bacteria; p__Actinobacteriota; c__Actinobacteria; o__Pseudonocardiales; f__Pseudonocardiaceae
bASV1344	2	0.288881	0.32413	-0.682754	0	Peripherals	d__Bacteria; p__MBNT15; c__MBNT15; o__MBNT15; f__MBNT15; g__MBNT15; s__uncultured_bacterium
[truncated: 1,411 more rows]

## Sheet: Table S6D
KO	Degree	Closeness	Betweenness	HubScore	z	module	pvalue	roles	label	role_7	Clade	Description
[truncated: 6,171 more rows]

[truncated: 3 more sheets: Table S6E, Table S6F, Table S6G]
