# Supplementary material for: A quantitative microbiome atlas reveals hidden diversity, eukaryotic keystones, and evolutionary trade-offs in plant rhizospheres
Source: Research Square preprint supplement (doi:10.21203/rs.3.rs-7503976/v1), 2025-09-12
Supplement: Supplementary file 6 [file 918cf13d4f57e2eff961def8.xlsx]

## Sheet: Table S8A
Supplementary Information Table 8. Hierarchical host phylogeny filters rhizosphere communities and drives Fabales symbiotic specialization. (A) Phylogenetic filtering across plant lineages. PERMANOVA analysis confirms progressive refinement of microbiome selection through plant evolutionary history: Host lineage effects significantly increase from Class (R²= 0.01) to Genus (R²= 0.47; all P< 0.001…
Group	Clade	TreeLevel	ExplainedVariance	Pvalue
Amplicon (16S)	Bacteria	Class	0.00999105	0.000999001
Amplicon (16S)	Bacteria	Order	0.0707745	0.000999001
Amplicon (16S)	Bacteria	Family	0.175522	0.000999001
Amplicon (16S)	Bacteria	Genus	0.463699	0.000999001
Amplicon (ITS)	Fungi	Class	0.00818258	0.000999001
Amplicon (ITS)	Fungi	Order	0.0675997	0.000999001
Amplicon (ITS)	Fungi	Family	0.165873	0.000999001
Amplicon (ITS)	Fungi	Genus	0.447733	0.000999001
Amplicon (18S)	Protists	Class	0.00858159	0.000999001
Amplicon (18S)	Protists	Order	0.0735608	0.000999001
Amplicon (18S)	Protists	Family	0.17455	0.000999001
Amplicon (18S)	Protists	Genus	0.461326	0.000999001
Metagenome	Bacteria	Class	0.00785079	0.330669
Metagenome	Bacteria	Order	0.104394	0.000999001
Metagenome	Bacteria	Family	0.250967	0.000999001
Metagenome	Bacteria	Genus	0.639954	0.000999001
Metagenome	Fungi	Class	0.0117959	0.017982
Metagenome	Fungi	Order	0.0893459	0.000999001
Metagenome	Fungi	Family	0.225651	0.002997
Metagenome	Fungi	Genus	0.621347	0.001998
Metagenome	Protists	Class	0.00905368	0.0719281
Metagenome	Protists	Order	0.0955787	0.000999001
Metagenome	Protists	Family	0.226899	0.000999001
Metagenome	Protists	Genus	0.609102	0.000999001

## Sheet: Table S8B
Comparison	Method	Taxa	Clade	mean.group1.	variance.group1.	std.err.group1.	mean.group2.	variance.group2.	std.err.group2.	pvalue	qvalue	Group
Arecales - Asparagales	metastat	bASV925|uncultured_actinobacterium	Bacteria	0.000822252574637996	1.98045207109655e-07	6.23156429405272e-05	0.000447371500490724	2.34990222149302e-07	6.9251128650539e-05	0.000999000999000999	0.129522243521237	Arecales
Arecales - Asparagales	metastat	bASV1303|Sporichthya	Bacteria	0.000381297678734816	1.48297425187794e-07	5.39239524769935e-05	0.000793481799928839	4.90660038060724e-07	0.000100067328157119	0.000999000999000999	0.129522243521237	Asparagales
Arecales - Asparagales	metastat	bASV361|Mesorhizobium	Bacteria	0.000366727754886819	1.72903313232363e-07	5.82259481998518e-05	0.00073688680835263	3.37039727277412e-07	8.29358895844957e-05	0.000999000999000999	0.129522243521237	Asparagales
Arecales - Asparagales	metastat	bASV973|Candidatus_Solibacter	Bacteria	0.000696565595995053	2.72939465933364e-07	7.31556849054639e-05	0.000353956268738899	2.51439176000391e-07	7.1633872959027e-05	0.000999000999000999	0.129522243521237	Arecales
Arecales - Asparagales	metastat	bASV1749|uncultured_Planctomycetaceae	Bacteria	0.000765072062186183	2.09811575523862e-07	6.41401002591374e-05	0.000393739638752363	2.13836051927431e-07	6.60605862806522e-05	0.000999000999000999	0.129522243521237	Arecales
Arecales - Asparagales	metastat	bASV440|Bacillus	Bacteria	0.000805220375979492	8.99973363499685e-07	0.000132840267009704	0.000339736220745664	3.01236949621997e-07	7.84072244721653e-05	0.000999000999000999	0.129522243521237	Arecales
Arecales - Asparagales	metastat	bASV1138|Microtrichales	Bacteria	0.000650100686496483	2.73376241335809e-07	7.32141957380185e-05	0.000291878966393678	2.47750663210739e-07	7.11065115435474e-05	0.000999000999000999	0.129522243521237	Arecales
Arecales - Asparagales	metastat	bASV723|Gaiellales	Bacteria	0.000656564388156885	2.14337201144983e-07	6.48281591480823e-05	0.000245308690037284	2.12489774114848e-07	6.58523044573524e-05	0.000999000999000999	0.129522243521237	Arecales
Arecales - Asparagales	metastat	bASV854|uncultured_Truepera	Bacteria	0.000702833378987509	3.83087096346414e-07	8.66689776855995e-05	0.000312543583671957	1.76593679454968e-07	6.00329296464709e-05	0.000999000999000999	0.129522243521237	Arecales
Arecales - Asparagales	metastat	bASV674|Bacillus	Bacteria	0.000481889303750935	2.50497781785443e-07	7.00836729308565e-05	0.000116463495884093	1.03354364801692e-07	4.59268195181741e-05	0.000999000999000999	0.129522243521237	Arecales
Arecales - Asparagales	metastat	bASV2806|Hydrogenophaga	Bacteria	0.000111626005953514	1.12951358779455e-07	4.7060944795949e-05	0.000570207976934446	7.09121390938406e-07	0.000120299065337982	0.000999000999000999	0.129522243521237	Asparagales
Arecales - Asparagales	metastat	bASV2943|Micromonosporaceae	Bacteria	0.000487376104155242	1.96069050844155e-07	6.20039611075183e-05	0.000167034282163018	1.20533874966024e-07	4.95971269259279e-05	0.000999000999000999	0.129522243521237	Arecales
Arecales - Asparagales	metastat	bASV3854|uncultured_bacterium	Bacteria	0.000414741382166565	1.90315459016289e-07	6.10874427929837e-05	0.000147843116248219	1.03251661889631e-07	4.59039951775199e-05	0.000999000999000999	0.129522243521237	Arecales
Arecales - Asparagales	metastat	bASV4407|uncultured_bacterium	Bacteria	0.000362321064820012	2.07191139102841e-07	6.37383036717928e-05	7.23495400944159e-05	6.48885558432499e-08	3.63903317063609e-05	0.000999000999000999	0.129522243521237	Arecales
Arecales - Asparagales	metastat	bASV3683|Xanthobacteraceae	Bacteria	0.000439761047365181	2.20947973725047e-07	6.58203100136656e-05	0.000139056518713958	8.93162723908085e-08	4.2694040207038e-05	0.000999000999000999	0.129522243521237	Arecales
Arecales - Asparagales	metastat	bASV3352|uncultured_bacterium	Bacteria	0.0004625193940774	2.41195869582207e-07	6.87701299702255e-05	0.000181414518053753	1.39641963394939e-07	5.33838551216734e-05	0.000999000999000999	0.129522243521237	Arecales
Arecales - Asparagales	metastat	bASV1218|Sphingomonas	Bacteria	0.000232802934945691	1.28699279209903e-07	5.02346024033787e-05	0.000570515486270024	5.10286749751387e-07	0.000102049082803564	0.000999000999000999	0.129522243521237	Asparagales
Arecales - Asparagales	metastat	bASV2250|Terribacillus_goriensis	Bacteria	0.000453948121925446	2.67342255589035e-07	7.24016920489411e-05	0.000141541140669532	9.80601102919757e-08	4.47350728249387e-05	0.000999000999000999	0.129522243521237	Arecales
Arecales - Asparagales	metastat	bASV2655|Novosphingobium	Bacteria	0.000189701710953212	1.27487833058724e-07	4.99976142683229e-05	0.000579172370336236	4.59630020186109e-07	9.68514558155636e-05	0.000999000999000999	0.129522243521237	Asparagales
Arecales - Asparagales	metastat	bASV1154|Tumebacillus	Bacteria	0.000594055433307008	2.90654590512451e-07	7.54924474228462e-05	0.000252416514931957	2.04508812204924e-07	6.46037864886565e-05	0.001998001998002	0.164061508460234	Arecales
Arecales - Asparagales	metastat	bASV3518|uncultured_Bradyrhizobiaceae	Bacteria	0.000550984557574151	1.7953022144196e-07	5.93312769155578e-05	0.000289834139094254	1.72044290562378e-07	5.92546029491446e-05	0.001998001998002	0.164061508460234	Arecales
Arecales - Asparagales	metastat	bASV2718|metagenome	Bacteria	0.000203897737599008	1.03229918065574e-07	4.49901771557021e-05	0.000541540269260698	3.64075602369314e-07	8.61981109657725e-05	0.001998001998002	0.164061508460234	Asparagales
Arecales - Asparagales	metastat	bASV2837|Microscillaceae	Bacteria	0.000439155393344395	2.11830362503661e-07	6.44479365044346e-05	0.000175794489785973	1.33693844877921e-07	5.22345270279641e-05	0.001998001998002	0.164061508460234	Arecales
Arecales - Asparagales	metastat	bASV899|Rhodanobacteraceae	Bacteria	0.000178299720938455	1.30487256921561e-07	5.05823453897568e-05	0.000578693555214613	4.98883099130688e-07	0.00010090236735261	0.001998001998002	0.164061508460234	Asparagales
Arecales - Asparagales	metastat	bASV1375|uncultured_Conexibacteraceae	Bacteria	0.000456131090579915	2.51198282794534e-07	7.01815967713974e-05	0.000173101718015681	1.26300236218893e-07	5.07696350312063e-05	0.001998001998002	0.164061508460234	Arecales
Arecales - Asparagales	metastat	bASV3696|Pedosphaeraceae	Bacteria	0.000358825852139147	2.14463640141021e-07	6.48472776184924e-05	9.41671229146464e-05	6.50672622573297e-08	3.6440407672995e-05	0.001998001998002	0.164061508460234	Arecales
Arecales - Asparagales	metastat	bASV895|Gaiella	Bacteria	0.000500042464868479	2.49559548145508e-07	6.99523014163318e-05	0.000206883044820736	1.64303058128838e-07	5.79061623256317e-05	0.001998001998002	0.164061508460234	Arecales
Arecales - Asparagales	metastat	bASV1885|uncultured_bacterium	Bacteria	0.000438397543493795	2.35546178273229e-07	6.79599331603655e-05	0.000180007836343631	1.17594981295036e-07	4.89887494987341e-05	0.001998001998002	0.164061508460234	Arecales
Arecales - Asparagales	metastat	bASV5163|Bacillus	Bacteria	0.000160346370414704	1.06102104053687e-07	4.56117683588061e-05	0.000473231796482513	4.02911661004934e-07	9.06790326331527e-05	0.001998001998002	0.164061508460234	Asparagales
Arecales - Asparagales	metastat	bASV1825|Nocardioides	Bacteria	0.000444295977279274	2.24240061560298e-07	6.63088527435267e-05	0.00017949258678563	1.54384443403815e-07	5.61311226202405e-05	0.001998001998002	0.164061508460234	Arecales
Arecales - Asparagales	metastat	bASV71|Comamonadaceae	Bacteria	0.00090646508716814	3.05093004168997e-07	7.73447850085546e-05	0.00134610584640025	8.49782126928203e-07	0.000131690897127667	0.002997002997003	0.184569197017763	Asparagales
Arecales - Asparagales	metastat	bASV801|Bacillus	Bacteria	0.000725626704048852	2.00762231612492e-07	6.27416476141883e-05	0.000435915241405867	1.90489564802473e-07	6.23501574883815e-05	0.002997002997003	0.184569197017763	Arecales
Arecales - Asparagales	metastat	bASV1016|Pedosphaeraceae	Bacteria	0.000698430588083375	2.74706562448321e-07	7.33921193675533e-05	0.000403763012176985	1.96369890462321e-07	6.33052034586836e-05	0.002997002997003	0.184569197017763	Arecales
Arecales - Asparagales	metastat	bASV2430|NB1-j	Bacteria	0.000521993383841869	2.20013792973077e-07	6.56810165926851e-05	0.000264312676275428	1.91957767955964e-07	6.25899789781803e-05	0.002997002997003	0.184569197017763	Arecales
Arecales - Asparagales	metastat	bASV807|uncultured_bacterium	Bacteria	0.000356798782945308	1.53449443255675e-07	5.48526445384029e-05	0.000138681886343482	1.05417041682764e-07	4.63828437852557e-05	0.002997002997003	0.184569197017763	Arecales
Arecales - Asparagales	metastat	bASV3638|Sandaracinaceae	Bacteria	0.000536836230319473	2.28613426110638e-07	6.69523427390544e-05	0.000238556686178186	1.35423538726207e-07	5.25713390383957e-05	0.002997002997003	0.184569197017763	Arecales
Arecales - Asparagales	metastat	bASV3106|Empedobacter_brevis	Bacteria	7.95787388416623e-05	5.78966183250493e-08	3.36931418881511e-05	0.000286132563388213	2.03192797843603e-07	6.43955883017353e-05	0.002997002997003	0.184569197017763	Asparagales
Arecales - Asparagales	metastat	bASV1467|uncultured_Chloroflexi	Bacteria	0.000559174203496536	3.4095301668105e-07	8.17640096145968e-05	0.000262978259065614	2.23566720403204e-07	6.75469179954026e-05	0.002997002997003	0.184569197017763	Arecales
Arecales - Asparagales	metastat	bASV4117|uncultured_actinobacterium	Bacteria	0.000185490903306762	1.14199296009583e-07	4.73202058590286e-05	2.95200139128817e-05	2.09128953700241e-08	2.06589879486319e-05	0.002997002997003	0.184569197017763	Arecales
Arecales - Asparagales	metastat	bASV5803|KD3-93	Bacteria	0.000309192515156208	1.78622736012663e-07	5.91811337208369e-05	9.14650432971704e-05	6.41011115105215e-08	3.61688533021758e-05	0.002997002997003	0.184569197017763	Arecales
Arecales - Asparagales	metastat	bASV40|Allorhizobium-Neorhizobium-Pararhizobium-Rhizobium	Bacteria	0.000821012213593757	3.12732571651876e-07	7.83071593716713e-05	0.00121275847065858	3.87468703824643e-07	8.89242630998416e-05	0.003996003996004	0.19687381015228	Asparagales
Arecales - Asparagales	metastat	bASV11|Acinetobacter	Bacteria	0.000514799590074445	3.22866554054721e-07	7.9565801360704e-05	0.000981802936024375	1.1288738076403e-06	0.000151783533271074	0.003996003996004	0.19687381015228	Asparagales
Arecales - Asparagales	metastat	bASV241|Comamonadaceae	Bacteria	0.000397778864940588	2.14366598274541e-07	6.48326047049949e-05	0.000843707047605262	9.66755201615649e-07	0.000140462443351083	0.003996003996004	0.19687381015228	Asparagales
Arecales - Asparagales	metastat	bASV2635|Xanthobacteraceae	Bacteria	0.00021901931418445	1.17013293322671e-07	4.78996691057937e-05	0.000493231757912163	2.88103111327186e-07	7.66789106156828e-05	0.003996003996004	0.19687381015228	Asparagales
Arecales - Asparagales	metastat	bASV1500|uncultured_Methylocystaceae	Bacteria	0.000585592900310542	2.45562906223777e-07	6.93899052136855e-05	0.000282174127969839	2.31182472742702e-07	6.86877692737961e-05	0.003996003996004	0.19687381015228	Arecales
Arecales - Asparagales	metastat	bASV1335|Bryobacter	Bacteria	0.000650535302372566	9.12101570902622e-07	0.00013373236155659	0.000265235289079894	2.58922769344952e-07	7.26920776281499e-05	0.003996003996004	0.19687381015228	Arecales
Arecales - Asparagales	metastat	bASV2327|metagenome	Bacteria	0.000375553915552411	1.99169157270374e-07	6.24922202640996e-05	0.000145002650365729	1.15011306829117e-07	4.84475956795054e-05	0.003996003996004	0.19687381015228	Arecales
Arecales - Asparagales	metastat	bASV1079|Alcaligenaceae	Bacteria	4.43279262127469e-05	2.37839565199755e-08	2.15951867004426e-05	0.000336257856516207	5.49729663677425e-07	0.000105919652228048	0.003996003996004	0.19687381015228	Asparagales
Arecales - Asparagales	metastat	bASV2242|Micromonospora	Bacteria	0.000285754335789445	1.4283472744487e-07	5.29214600166281e-05	8.79087445335181e-05	7.09035476791462e-08	3.80396001178434e-05	0.003996003996004	0.19687381015228	Arecales
Arecales - Asparagales	metastat	bASV4491|Paenibacillus	Bacteria	0.000311294365795802	1.66658411319696e-07	5.71647792496455e-05	8.86070035770751e-05	5.80485966779689e-08	3.44189662588215e-05	0.003996003996004	0.19687381015228	Arecales
Arecales - Asparagales	metastat	fASV124|Rhodotorula	Fungi	0.00196853654527071	3.24596212817042e-06	0.000252282215462437	0.000749784146912725	1.9813770217915e-06	0.000201087706612928	0.000999000999000999	0.0643968139561948	Arecales
Arecales - Asparagales	metastat	fASV23|Talaromyces	Fungi	0.000725516223028318	1.4060602274186e-06	0.000166041586299207	0.00183768332668545	4.97795448942655e-06	0.00031873328653826	0.000999000999000999	0.0643968139561948	Asparagales
Arecales - Asparagales	metastat	fASV359|Chaetosphaeriaceae	Fungi	0.00187680291934019	2.09024289364483e-06	0.000202447906329874	0.000683115196108259	1.77818693009869e-06	0.000190498108089523	0.000999000999000999	0.0643968139561948	Arecales
Arecales - Asparagales	metastat	fASV383|Helotiales	Fungi	0.000285716121100851	4.62062764084746e-07	9.51843169736491e-05	0.00106359044276864	2.08860738419143e-06	0.000206457357567374	0.000999000999000999	0.0643968139561948	Asparagales
Arecales - Asparagales	metastat	fASV2342|Talaromyces	Fungi	0.00145782691427357	2.59113503630421e-06	0.000225403126285547	0.000383360030052967	6.93770896410886e-07	0.000118989872353369	0.000999000999000999	0.0643968139561948	Arecales
Arecales - Asparagales	metastat	fASV2535|Leotiomycetes	Fungi	0.00112822302548765	1.7877251939212e-06	0.000187225626384118	0.000243639074843879	7.16386909931565e-07	0.000120913775141675	0.000999000999000999	0.0643968139561948	Arecales
Arecales - Asparagales	metastat	fASV329|Exophiala	Fungi	0.000130744659091778	3.00273180685449e-07	7.67314109423571e-05	0.000886055158516261	2.21848887942059e-06	0.000212779893912657	0.000999000999000999	0.0643968139561948	Asparagales
Arecales - Asparagales	metastat	fASV2338|Westerdykella	Fungi	0.00142649419838635	2.15518923479905e-06	0.000205568996804091	0.000456015829812146	8.9089737022414e-07	0.000134839085521098	0.000999000999000999	0.0643968139561948	Arecales
Arecales - Asparagales	metastat	fASV614|Eurotiomycetes	Fungi	0.00101479799408395	1.86340282263161e-06	0.000191147352185895	0.000200139414742011	4.82232444451529e-07	9.92042260097546e-05	0.000999000999000999	0.0643968139561948	Arecales
Arecales - Asparagales	metastat	fASV3322|Pleosporales	Fungi	0.000720571264770602	1.11887372722529e-06	0.000148117185140108	0.000120285349182057	2.34612392581035e-07	6.91954334610158e-05	0.000999000999000999	0.0643968139561948	Arecales
Arecales - Asparagales	metastat	fASV1392|Pleosporales	Fungi	0.00110767173883312	2.12305644795421e-06	0.000204030776607412	0.000360862913147665	7.69021849624656e-07	0.000125276986959807	0.000999000999000999	0.0643968139561948	Arecales
Arecales - Asparagales	metastat	fASV2841|Gyrodontaceae	Fungi	0.000847459003458274	1.31341581391857e-06	0.000160478195569695	0.00016241566497147	2.3740739763301e-07	6.96063857076771e-05	0.000999000999000999	0.0643968139561948	Arecales
Arecales - Asparagales	metastat	fASV3001|Hypocreales	Fungi	0.000861790876513968	1.13910429763333e-06	0.000149450253880571	0.000198412417871725	4.61674450200057e-07	9.70666140086447e-05	0.000999000999000999	0.0643968139561948	Arecales
Arecales - Asparagales	metastat	fASV1532|Ascomycota	Fungi	0.000897096972744795	1.92591368214558e-06	0.000194327078338052	0.000197227668129705	3.67678933753576e-07	8.66236209659736e-05	0.000999000999000999	0.0643968139561948	Arecales
Arecales - Asparagales	metastat	fASV237|Cladosporium	Fungi	0.0023297983618552	1.22708449437487e-06	0.000155114410297239	0.001412529080531	1.8771373217198e-06	0.000195726658718369	0.001998001998002	0.0949005679354449	Arecales
Arecales - Asparagales	metastat	fASV356|Chaetosphaeriaceae	Fungi	0.00218993394388808	1.73261739088988e-06	0.000184317362224639	0.0012617298533061	2.27486166424674e-06	0.000215466350621004	0.001998001998002	0.0949005679354449	Arecales
Arecales - Asparagales	metastat	fASV1424|Sordariomycetes	Fungi	0.00142805806956992	1.93064259921281e-06	0.000194565508863896	0.000658642851497519	1.18935762869634e-06	0.000155796677330655	0.001998001998002	0.0949005679354449	Arecales
Arecales - Asparagales	metastat	fASV2372|Pestalotiopsis	Fungi	0.000893176263686604	1.45136868829295e-06	0.000168695612196558	0.000248203773972312	6.16441759469906e-07	0.000112162578745384	0.001998001998002	0.0949005679354449	Arecales
Arecales - Asparagales	metastat	fASV2110|Xylaria	Fungi	0.00014527846196495	2.60292180476411e-07	7.14406624033925e-05	0.00103805212936825	2.0078904214354e-06	0.000202428643080711	0.001998001998002	0.0949005679354449	Asparagales
Arecales - Asparagales	metastat	fASV84|Talaromyces	Fungi	0.00101938633141785	2.29914974217494e-06	0.000212323732761145	0.00192863187535589	2.62625198776287e-06	0.000231510214336429	0.002997002997003	0.100172821709636	Asparagales
Arecales - Asparagales	metastat	fASV31|Chaetomellaceae	Fungi	0.001441338655259	2.0634831726709e-06	0.000201147842061743	0.00244746615489599	2.9525908007115e-06	0.000245472921350933	0.002997002997003	0.100172821709636	Asparagales
Arecales - Asparagales	metastat	fASV518|Pestalotiopsis	Fungi	0.00225391161345489	2.35348505707154e-06	0.000214817983011042	0.00124388042533797	1.92002432754363e-06	0.000197949917781923	0.002997002997003	0.100172821709636	Arecales
Arecales - Asparagales	metastat	fASV377|Fusarium	Fungi	0.00182533718417194	1.95937892847311e-06	0.000196008149514104	0.00103903518050056	1.74882327171675e-06	0.00018891868846507	0.002997002997003	0.100172821709636	Arecales
Arecales - Asparagales	metastat	fASV1362|Lecanicillium	Fungi	0.000201069554568859	3.18943578347498e-07	7.90809436834975e-05	0.000763249964398881	1.16796646283635e-06	0.000154389281564383	0.002997002997003	0.100172821709636	Asparagales
Arecales - Asparagales	metastat	fASV1733|Hypocreales_fam_Incertae_sedis	Fungi	0.000742054623201663	1.20170020881385e-06	0.000153501626025357	0.000191738250842074	3.49318843841006e-07	8.4433145131253e-05	0.002997002997003	0.100172821709636	Arecales
Arecales - Asparagales	metastat	fASV676|Stachybotryaceae	Fungi	0.000229484864827101	4.09102537978903e-07	8.95634880503389e-05	0.000856575530557447	1.74690253971733e-06	0.000188814915298366	0.002997002997003	0.100172821709636	Asparagales
Arecales - Asparagales	metastat	fASV751|Volutella	Fungi	0.000134188862763472	2.94374632829286e-07	7.59740194020538e-05	0.000640041836124576	1.40640161594391e-06	0.000169416863962162	0.002997002997003	0.100172821709636	Asparagales
Arecales - Asparagales	metastat	fASV788|Exophiala	Fungi	0.00218636869760885	1.56253041754594e-06	0.000175036714218561	0.00135657341465238	2.51473988009821e-06	0.00022654187701796	0.003996003996004	0.112694424423341	Arecales
Arecales - Asparagales	metastat	fASV737|Hypocreales	Fungi	0.000358431873900632	5.58491877516411e-07	0.000104646171108994	0.000954905100099204	1.61748540321125e-06	0.000181686285084991	0.003996003996004	0.112694424423341	Asparagales
Arecales - Asparagales	metastat	fASV523|Clavicipitaceae	Fungi	0.00021325797311915	4.33509058033537e-07	9.21964077852317e-05	0.000843405767809944	1.82339214719569e-06	0.000192904340637132	0.003996003996004	0.112694424423341	Asparagales
Arecales - Asparagales	metastat	fASV726|Sordariomycetes	Fungi	0.00121821592727786	2.1748077554786e-06	0.000206502516505513	0.00049410667884034	1.03742429858245e-06	0.000145505754047276	0.003996003996004	0.112694424423341	Arecales
Arecales - Asparagales	metastat	fASV3834|Nectriaceae	Fungi	0.000148426275112639	2.09039862634459e-07	6.40220339880716e-05	0.000637505536930808	1.24354741302711e-06	0.000159306367208616	0.003996003996004	0.112694424423341	Asparagales
Arecales - Asparagales	metastat	fASV171|Volutella	Fungi	0.000623706903884289	1.26312452883784e-06	0.000157375816516615	0.00141830137463018	2.20705008070531e-06	0.000212230625456697	0.004995004995005	0.121831810187396	Asparagales
Arecales - Asparagales	metastat	fASV429|Pleosporales	Fungi	0.000315848476914232	4.93117679091207e-07	9.8330941721452e-05	0.000919093236579931	1.85895047881456e-06	0.00019477619175291	0.004995004995005	0.121831810187396	Asparagales
Arecales - Asparagales	metastat	fASV103|Clavicipitaceae	Fungi	0.0012200907029293	2.18269252114173e-06	0.000206876515272775	0.00045973285783959	1.01923286675506e-06	0.0001442243764074	0.004995004995005	0.121831810187396	Arecales
Arecales - Asparagales	metastat	fASV446|Dictyosporiaceae	Fungi	0.00142465055797162	2.41730945481484e-06	0.000217711333201128	0.000611455701801125	1.63221828014918e-06	0.00018251185480922	0.004995004995005	0.121831810187396	Arecales
Arecales - Asparagales	metastat	fASV1776|Sympoventuriaceae	Fungi	0.0002358122906618	4.39579022223345e-07	9.28396279300129e-05	0.000788722312667855	1.44845348791468e-06	0.00017193101891039	0.004995004995005	0.121831810187396	Asparagales
Arecales - Asparagales	metastat	fASV301|Trichocomaceae	Fungi	0.00130571338587174	2.28625855242921e-06	0.000211727653052782	0.000552502948845216	1.19504782863012e-06	0.000156168918791586	0.00599400599400599	0.142350851903167	Arecales
Arecales - Asparagales	metastat	fASV247|Clavicipitaceae	Fungi	0.00176480973560758	3.15986814948096e-06	0.000248914039398003	0.000927675853136553	2.10863425885736e-06	0.000207444817292645	0.00699300699300699	0.150259232564455	Arecales
Arecales - Asparagales	metastat	fASV61|Didymellaceae	Fungi	0.000299525530452987	5.88379787748877e-07	0.000107409769496593	0.000924965983174423	1.72873221888097e-06	0.000187830373914651	0.00699300699300699	0.150259232564455	Asparagales
Arecales - Asparagales	metastat	fASV1256|Tremellales	Fungi	0.00140421629689807	2.70688902111656e-06	0.00023038284509922	0.000613010463190708	1.27928747130151e-06	0.00016157941569885	0.00699300699300699	0.150259232564455	Arecales
Arecales - Asparagales	metastat	fASV2189|Xylaria	Fungi	0.000933700015655712	1.31719360903276e-06	0.00016070882261814	0.000343950692107448	7.63964300928265e-07	0.000124864359135061	0.00699300699300699	0.150259232564455	Arecales
Arecales - Asparagales	metastat	fASV969|Hypocreales	Fungi	0.000252366261324797	4.71873028195155e-07	9.61894605325971e-05	0.000801179825488548	1.52775192645694e-06	0.000176574660537743	0.00799200799200799	0.160276514735418	Asparagales
Arecales - Asparagales	metastat	fASV1765|Sordariomycetes	Fungi	0.00125173804751221	2.03677261157298e-06	0.0001998417320631	0.000500102974454818	1.12735564808899e-06	0.00015168143632055	0.00799200799200799	0.160276514735418	Arecales
Arecales - Asparagales	metastat	fASV1068|Pseudohyphozyma	Fungi	0.000281101838652596	4.42448387943832e-07	9.31421418431741e-05	0.000849510791402081	1.58152661230909e-06	0.00017965537373658	0.00799200799200799	0.160276514735418	Asparagales
Arecales - Asparagales	metastat	fASV815|Plectosphaerellaceae	Fungi	0.00107042199816856	1.5460056486104e-06	0.000174108690901008	0.000458003674347559	1.02644726610515e-06	0.00014473390546068	0.00899100899100899	0.176391273010447	Arecales
Arecales - Asparagales	metastat	fASV145|Chaetothyriales	Fungi	0.000348525768904905	5.9171655017424e-07	0.000107713904847676	0.000876666745147053	1.47993616890094e-06	0.000173789467336666	0.00999000999000999	0.183990897017699	Asparagales
Arecales - Asparagales	metastat	fASV1630|Hypocreales	Fungi	0.000146129915350504	2.64470780540257e-07	7.20118155528711e-05	0.000571628859906301	1.10864325144878e-06	0.000150417327720401	0.00999000999000999	0.183990897017699	Asparagales
Arecales - Asparagales	metastat	fASV6129|Hypoxylon	Fungi	0.000778120189452968	1.4274778923797e-06	0.000167301412413883	0.00027656148603031	4.91259164947717e-07	0.000100128403781499	0.00999000999000999	0.183990897017699	Arecales
Arecales - Asparagales	metastat	fASV166|Periconiaceae	Fungi	0.00222323375128626	1.96169514188119e-06	0.000196123967492811	0.00147697112876104	2.30613448721772e-06	0.000216942317510651	0.010989010989011	0.194453124495176	Arecales
Arecales - Asparagales	metastat	fASV182|Ustilaginaceae	Fungi	0.00122927808495182	2.28926670636143e-06	0.000211866898022497	0.000512539068921796	1.26883906033672e-06	0.000160918223644028	0.010989010989011	0.194453124495176	Arecales
Arecales - Asparagales	metastat	pASV553|Chrysophyceae_Clade-F	Protist	0.00167829847751287	2.34962229475398e-06	0.000214641620817895	0.000651406751233718	1.5935761810645e-06	0.000180338467551622	0.000999000999000999	0.147774506942083	Arecales
Arecales - Asparagales	metastat	pASV627|Protist	Protist	0.00140693009581835	5.42110968987399e-06	0.000326031085065369	0.000311192758469472	6.75721011974433e-07	0.000117431787579735	0.000999000999000999	0.147774506942083	Arecales
Arecales - Asparagales	metastat	pASV1216|Naegleria_sp.	Protist	0.00171379293468585	3.89625353564289e-06	0.000276400304178307	0.000625574733308646	1.28864045732524e-06	0.000162169000870611	0.000999000999000999	0.147774506942083	Arecales
Arecales - Asparagales	metastat	pASV1473|Protist	Protist	0.00134319512150993	1.66341833955088e-06	0.00018059913032334	0.000462774281724186	1.12026683022625e-06	0.000151203797478649	0.000999000999000999	0.147774506942083	Arecales
Arecales - Asparagales	metastat	pASV895|Agitata_tremulans	Protist	0.000936581438477178	1.63462847091011e-06	0.000179029435136506	0.000256087659797304	6.1500122315857e-07	0.000112031448132134	0.000999000999000999	0.147774506942083	Arecales
Arecales - Asparagales	metastat	pASV885|Opisthokonta	Protist	0.00211987651717824	1.45576405861861e-06	0.000168950860625944	0.00116427459910475	2.04631230661659e-06	0.000204356246895554	0.001998001998002	0.147774506942083	Arecales
Arecales - Asparagales	metastat	pASV190|Glissomonadida	Protist	0.00148570044371562	2.11154159860403e-06	0.000203476722116355	0.000654183674049051	1.24366355905682e-06	0.000159313806559078	0.001998001998002	0.147774506942083	Arecales
Arecales - Asparagales	metastat	pASV594|Hypotrichia	Protist	0.00124576062936665	2.46203317550513e-06	0.000219716090225596	0.000395531993118525	9.96373402987884e-07	0.00014259786492576	0.001998001998002	0.147774506942083	Arecales
Arecales - Asparagales	metastat	pASV27|LKM74-lineage_X_sp.	Protist	0.00338388840717155	1.05045258199619e-06	0.000143516930885891	0.00403989268048768	1.57852221694741e-06	0.000179484648706723	0.002997002997003	0.147774506942083	Asparagales
Arecales - Asparagales	metastat	pASV77|Watanabea-Clade_XX_sp.	Protist	0.00262186539646529	2.14503602737935e-06	0.0002050842020942	0.00355999382345217	2.10541552906661e-06	0.000207286429508789	0.002997002997003	0.147774506942083	Asparagales
Arecales - Asparagales	metastat	pASV365|Sandonidae_Clade_N/F-A_sp.	Protist	0.00204257980096494	2.06112980599036e-06	0.00020103310653069	0.00101635881152382	2.15487807373129e-06	0.00020970718525014	0.002997002997003	0.147774506942083	Arecales
Arecales - Asparagales	metastat	pASV61|Amoebogregarina_sp.	Protist	0.000731281698948852	2.056543991216e-06	0.000200809342373874	0.00205015166105548	3.73173012191933e-06	0.000275966950177354	0.002997002997003	0.147774506942083	Asparagales
Arecales - Asparagales	metastat	pASV441|Cyrtolophosidida	Protist	0.000617702086792512	1.26423045862478e-06	0.000157444696709843	0.00134914469985521	1.90267278114268e-06	0.000197053436300954	0.002997002997003	0.147774506942083	Asparagales
Arecales - Asparagales	metastat	pASV673|Ripidomyxa_sp.	Protist	0.000764670822174354	1.44854882730641e-06	0.000168531653354729	0.00165933685475477	2.70452922196971e-06	0.000234935041911055	0.002997002997003	0.147774506942083	Asparagales
Arecales - Asparagales	metastat	pASV892|Dictyochloris_fragrans	Protist	0.00117767486567542	1.83115752803487e-06	0.000189486278050183	0.000382350557967243	9.89114400659324e-07	0.000142077472446271	0.002997002997003	0.147774506942083	Arecales
Arecales - Asparagales	metastat	pASV803|Colpodida	Protist	0.000173416231564638	3.82754019550693e-07	8.66312921264816e-05	0.00085086738801097	1.78448627953571e-06	0.000190835236100316	0.002997002997003	0.147774506942083	Asparagales
Arecales - Asparagales	metastat	pASV954|Chlamydomonadales_X	Protist	0.00101225321224579	1.83879073484963e-06	0.00018988080548378	0.000383782587120158	8.05339745155231e-07	0.000128201033549531	0.003996003996004	0.185442518515555	Arecales
Arecales - Fabales	metastat	bASV6|Bradyrhizobium	Bacteria	0.00134554972729668	9.06802286904145e-07	0.000133343305036738	0.00211455850334801	2.050573014388e-06	0.000133533028462364	0.000999000999000999	0.0219150291443114	Fabales
Arecales - Fabales	metastat	bASV45|Reyranella	Bacteria	0.00103664688020654	2.38011215446049e-07	6.83146146689968e-05	0.00176186100755633	1.4019757207375e-06	0.000110413283728926	0.000999000999000999	0.0219150291443114	Fabales
Arecales - Fabales	metastat	bASV5|Enterobacterales	Bacteria	0.00110040979163227	3.19138106251319e-07	7.91050562637842e-05	0.00171875896171604	2.24457643891419e-06	0.000139707036295808	0.000999000999000999	0.0219150291443114	Fabales
Arecales - Fabales	metastat	bASV49|Streptomyces	Bacteria	0.00102019999271273	2.38385817976107e-07	6.83683532419913e-05	0.0016737615234499	1.5387795377146e-06	0.00011567493951717	0.000999000999000999	0.0219150291443114	Fabales
Arecales - Fabales	metastat	bASV76|Streptomyces	Bacteria	0.000952519744334249	2.52497244469474e-07	7.03628194584793e-05	0.00151190287547542	1.59432133635859e-06	0.000117744060548388	0.000999000999000999	0.0219150291443114	Fabales
Arecales - Fabales	metastat	bASV32|Methyloligellaceae	Bacteria	0.000968631460202682	2.81874621230622e-07	7.43434822796401e-05	0.00141045594902381	1.00484593372195e-06	9.34761505840764e-05	0.000999000999000999	0.0219150291443114	Fabales
Arecales - Fabales	metastat	bASV8|Bacillus	Bacteria	0.00110426580143694	3.09313609630281e-07	7.78779348586534e-05	0.00179729217739595	1.85983284261365e-06	0.000127170985295343	0.000999000999000999	0.0219150291443114	Fabales
Arecales - Fabales	metastat	bASV23|Sphingomonas	Bacteria	0.00102564379708335	3.01452442051597e-07	7.68819367412797e-05	0.00150967281296005	1.6523999621735e-06	0.000119869492879748	0.000999000999000999	0.0219150291443114	Fabales
Arecales - Fabales	metastat	bASV184|Devosia	Bacteria	0.000922855000183965	2.5485534741418e-07	7.06906194256907e-05	0.0013907637620183	1.18175529388028e-06	0.000101371263138344	0.000999000999000999	0.0219150291443114	Fabales
Arecales - Fabales	metastat	bASV79|uncultured_bacterium	Bacteria	0.000932265347806206	2.74645606142123e-07	7.33839762044211e-05	0.00146916635824745	1.22469232486744e-06	0.000103196407287794	0.000999000999000999	0.0219150291443114	Fabales
Arecales - Fabales	metastat	bASV40|Allorhizobium-Neorhizobium-Pararhizobium-Rhizobium	Bacteria	0.000821012213593757	3.12732571651876e-07	7.83071593716713e-05	0.00164358799992168	2.29573727684379e-06	0.000141290243265839	0.000999000999000999	0.0219150291443114	Fabales
Arecales - Fabales	metastat	bASV25|Ralstonia	Bacteria	0.000900525161605312	1.82286950053432e-07	5.97850643774539e-05	0.00134190142968432	1.13213553159164e-06	9.92202438842449e-05	0.000999000999000999	0.0219150291443114	Fabales
Arecales - Fabales	metastat	bASV165|Microbacterium	Bacteria	0.000905648803171416	1.58739515987207e-07	5.57901382787399e-05	0.00147930239821543	1.31865978245827e-06	0.000107082243177779	0.000999000999000999	0.0219150291443114	Fabales
Arecales - Fabales	metastat	bASV454|Labrys	Bacteria	0.000810084311091726	1.37834391215633e-07	5.19868745153538e-05	0.0011977341395826	7.30309018585573e-07	7.96901073226278e-05	0.000999000999000999	0.0219150291443114	Fabales
Arecales - Fabales	metastat	bASV350|Afipia_sp.	Bacteria	0.00077321660464726	2.43633864347294e-07	6.91168184673237e-05	0.00143629394547051	1.18032315130402e-06	0.000101309819743975	0.000999000999000999	0.0219150291443114	Fabales
Arecales - Fabales	metastat	bASV71|Comamonadaceae	Bacteria	0.00090646508716814	3.05093004168997e-07	7.73447850085546e-05	0.00153846700645576	1.65311050873703e-06	0.000119895262579543	0.000999000999000999	0.0219150291443114	Fabales
Arecales - Fabales	metastat	bASV125|metagenome	Bacteria	0.000769976853534053	2.2664629084049e-07	6.66636701542975e-05	0.00113532392462186	8.54938529070878e-07	8.62220857952138e-05	0.000999000999000999	0.0219150291443114	Fabales
Arecales - Fabales	metastat	bASV230|Dongia	Bacteria	0.00080278159371705	2.74015966364337e-07	7.32998095875783e-05	0.00139832220515797	1.36774538198398e-06	0.000109057040598984	0.000999000999000999	0.0219150291443114	Fabales
Arecales - Fabales	metastat	bASV173|Sphingomonas	Bacteria	0.000868064335586917	2.08459024095275e-07	6.39330262462632e-05	0.00132346956295571	1.11834634787649e-06	9.86141513734208e-05	0.000999000999000999	0.0219150291443114	Fabales
Arecales - Fabales	metastat	bASV144|Microbacterium	Bacteria	0.000819943637033277	2.69650590976806e-07	7.27135921939034e-05	0.00118724286371583	1.09291995806264e-06	9.74866750342855e-05	0.000999000999000999	0.0219150291443114	Fabales
Arecales - Fabales	metastat	bASV276|Pelomonas	Bacteria	0.000695982277054446	2.76399496217585e-07	7.36179187769573e-05	0.00131567617831811	1.9746591040518e-06	0.000131037966753477	0.000999000999000999	0.0219150291443114	Fabales
Arecales - Fabales	metastat	bASV172|Pararhizobium_giardinii	Bacteria	0.000705681108058185	2.32655774717435e-07	6.75416755465541e-05	0.0012178712533525	1.50246698372036e-06	0.000114301926025857	0.000999000999000999	0.0219150291443114	Fabales
Arecales - Fabales	metastat	bASV369|Devosia	Bacteria	0.000805449711516911	2.16938366234373e-07	6.52203454113511e-05	0.00127780980066619	1.62778199921997e-06	0.000118973215810004	0.000999000999000999	0.0219150291443114	Fabales
Arecales - Fabales	metastat	bASV302|Terrabacter	Bacteria	0.00065071433763227	1.77307049133463e-07	5.89627747527073e-05	0.00119116147069896	1.77338862641769e-06	0.000124180395652863	0.000999000999000999	0.0219150291443114	Fabales
Arecales - Fabales	metastat	bASV243|Shinella	Bacteria	0.000645117764387723	2.99592869107034e-07	7.66444386925162e-05	0.00124520659220536	1.74656139875969e-06	0.000123237536586858	0.000999000999000999	0.0219150291443114	Fabales
Arecales - Fabales	metastat	bASV444|Caulobacteraceae	Bacteria	0.00047295756788913	1.69058711499504e-07	5.75749658798745e-05	0.00121238475862972	1.66388547214803e-06	0.000120285366204815	0.000999000999000999	0.0219150291443114	Fabales
Arecales - Fabales	metastat	bASV925|uncultured_actinobacterium	Bacteria	0.000822252574637996	1.98045207109655e-07	6.23156429405272e-05	0.000526295336221788	3.56950388863473e-07	5.57128030608743e-05	0.000999000999000999	0.0219150291443114	Arecales
Arecales - Fabales	metastat	bASV779|Phenylobacterium	Bacteria	0.000518532916832534	1.95322162849277e-07	6.18857522405438e-05	0.000906377557176588	9.95048970097754e-07	9.3019351427434e-05	0.000999000999000999	0.0219150291443114	Fabales
Arecales - Fabales	metastat	bASV1303|Sporichthya	Bacteria	0.000381297678734816	1.48297425187794e-07	5.39239524769935e-05	0.000827398311184842	9.80461576853083e-07	9.23350033421818e-05	0.000999000999000999	0.0219150291443114	Fabales
Arecales - Fabales	metastat	bASV140|Allorhizobium-Neorhizobium-Pararhizobium-Rhizobium	Bacteria	0.000632869400978722	2.86624973000947e-07	7.49673096077382e-05	0.00115499907277655	2.05067717799675e-06	0.000133536419979125	0.000999000999000999	0.0219150291443114	Fabales
Arecales - Fabales	metastat	bASV2278|metagenome	Bacteria	0.000556758682026459	1.83159931358996e-07	5.99280502195555e-05	0.000263126421448368	1.88959279539154e-07	4.05354680484349e-05	0.000999000999000999	0.0219150291443114	Arecales
Arecales - Fabales	metastat	bASV1749|uncultured_Planctomycetaceae	Bacteria	0.000765072062186183	2.09811575523862e-07	6.41401002591374e-05	0.000472394862828807	4.27281499547782e-07	6.09548300007103e-05	0.000999000999000999	0.0219150291443114	Arecales
Arecales - Fabales	metastat	bASV1068|Devosia	Bacteria	0.000243328324934361	1.70096121359615e-07	5.77513468749846e-05	0.000604091020963384	5.58713407677394e-07	6.97020620789966e-05	0.000999000999000999	0.0219150291443114	Fabales
Arecales - Fabales	metastat	bASV703|Novosphingobium	Bacteria	0.000378337994175158	2.49639300441024e-07	6.99634779291428e-05	0.000876803096241633	1.29060225087536e-06	0.000105936907017722	0.000999000999000999	0.0219150291443114	Fabales
Arecales - Fabales	metastat	bASV885|Phenylobacterium	Bacteria	0.000246411429818958	1.39951850861151e-07	5.23846727435988e-05	0.000683133730324732	1.35051580739657e-06	0.00010836796443826	0.000999000999000999	0.0219150291443114	Fabales
Arecales - Fabales	metastat	bASV1138|Microtrichales	Bacteria	0.000650100686496483	2.73376241335809e-07	7.32141957380185e-05	0.000329645691526874	2.77242367429642e-07	4.90999307030098e-05	0.000999000999000999	0.0219150291443114	Arecales
Arecales - Fabales	metastat	bASV1654|Microtrichales	Bacteria	0.000490383022388291	2.21967906444656e-07	6.59720538642817e-05	0.000211986185453447	1.46298033574618e-07	3.56673073513032e-05	0.000999000999000999	0.0219150291443114	Arecales
Arecales - Fabales	metastat	bASV854|uncultured_Truepera	Bacteria	0.000702833378987509	3.83087096346414e-07	8.66689776855995e-05	0.000310246339500939	2.50903497251926e-07	4.67094159813747e-05	0.000999000999000999	0.0219150291443114	Arecales
Arecales - Fabales	metastat	bASV1588|Flavobacterium_cauense	Bacteria	0.000440649209098169	1.82767011237596e-07	5.98637359927668e-05	0.000186812171813573	1.43062558309451e-07	3.52706995418171e-05	0.000999000999000999	0.0219150291443114	Arecales
Arecales - Fabales	metastat	bASV2635|Xanthobacteraceae	Bacteria	0.00021901931418445	1.17013293322671e-07	4.78996691057937e-05	0.000623249519633414	8.83485154452073e-07	8.76497552987518e-05	0.000999000999000999	0.0219150291443114	Fabales
Arecales - Fabales	metastat	bASV1516|uncultured_Chloroflexaceae	Bacteria	0.000471589084627524	1.98384922521352e-07	6.23690663838665e-05	0.000181955157879728	1.68655497532804e-07	3.82958162697117e-05	0.000999000999000999	0.0219150291443114	Arecales
Arecales - Fabales	metastat	bASV500|Bacillus	Bacteria	0.000695243981910825	2.68918916924446e-07	7.2614874094052e-05	0.00028864093371241	2.66705877432044e-07	4.8157881420255e-05	0.000999000999000999	0.0219150291443114	Arecales
Arecales - Fabales	metastat	bASV1528|Gaiellales	Bacteria	0.000584953541665865	2.69591848254576e-07	7.270567152333e-05	0.000200867935993007	2.07230244448467e-07	4.24499955905633e-05	0.000999000999000999	0.0219150291443114	Arecales
Arecales - Fabales	metastat	bASV2294|Desulfobacterota	Bacteria	0.000413409026156698	1.9217132045987e-07	6.1384567336231e-05	0.000122016442135068	1.08618657982162e-07	3.07328825431346e-05	0.000999000999000999	0.0219150291443114	Arecales
Arecales - Fabales	metastat	bASV1987|Xanthobacteraceae	Bacteria	0.000316434173536281	1.58817521570385e-07	5.58038444051995e-05	0.000100674514809669	9.01214738661926e-08	2.79940170418753e-05	0.000999000999000999	0.0219150291443114	Arecales
Arecales - Fabales	metastat	bASV3638|Sandaracinaceae	Bacteria	0.000536836230319473	2.28613426110638e-07	6.69523427390544e-05	0.000174277534745764	1.46635831831418e-07	3.5708461039905e-05	0.000999000999000999	0.0219150291443114	Arecales
Arecales - Fabales	metastat	bASV3769|uncultured_bacterium	Bacteria	0.000465015961394888	2.21462574618323e-07	6.58969151318078e-05	0.000152219361709974	1.63142736017177e-07	3.76647379800509e-05	0.000999000999000999	0.0219150291443114	Arecales
Arecales - Fabales	metastat	bASV1375|uncultured_Conexibacteraceae	Bacteria	0.000456131090579915	2.51198282794534e-07	7.01815967713974e-05	0.000185564660295213	1.40294080329331e-07	3.49277615172069e-05	0.000999000999000999	0.0219150291443114	Arecales
Arecales - Fabales	metastat	bASV3588|NB1-j	Bacteria	0.0004081113367881	2.17006375885783e-07	6.52305678202529e-05	0.000160813284511928	1.05813889063996e-07	3.03334926190429e-05	0.000999000999000999	0.0219150291443114	Arecales
Arecales - Fabales	metastat	bASV3835|metagenome	Bacteria	0.000378916243685377	1.75932150278492e-07	5.8733721195414e-05	0.000144907512347548	1.06905024460315e-07	3.0489488489487e-05	0.000999000999000999	0.0219150291443114	Arecales
Arecales - Fabales	metastat	bASV1846|mle1-7	Bacteria	0.000330501819283276	1.42459562311777e-07	5.28519134110707e-05	9.0052110557605e-05	6.02702706762059e-08	2.28929969691143e-05	0.000999000999000999	0.0219150291443114	Arecales
Arecales - Fabales	metastat	bASV2943|Micromonosporaceae	Bacteria	0.000487376104155242	1.96069050844155e-07	6.20039611075183e-05	0.000139460939198921	9.97456418816776e-08	2.94508642940536e-05	0.000999000999000999	0.0219150291443114	Arecales
Arecales - Fabales	metastat	bASV3854|uncultured_bacterium	Bacteria	0.000414741382166565	1.90315459016289e-07	6.10874427929837e-05	0.000171009062138492	1.76251976802867e-07	3.91487660756035e-05	0.000999000999000999	0.0219150291443114	Arecales
Arecales - Fabales	metastat	bASV2630|uncultured_Xanthomonadaceae	Bacteria	0.000354643347371143	1.81832798225019e-07	5.9710543330339e-05	8.17806271388722e-05	7.01127413394417e-08	2.46916182468326e-05	0.000999000999000999	0.0219150291443114	Arecales
Arecales - Fabales	metastat	bASV4131|Hamadaea	Bacteria	0.000395900607602551	1.50582960349338e-07	5.43378971406999e-05	0.000132388707483926	8.98855772399767e-08	2.79573552957041e-05	0.000999000999000999	0.0219150291443114	Arecales
Arecales - Fabales	metastat	bASV3146|Propionibacteriaceae	Bacteria	0.000398390160036014	1.72546717778616e-07	5.81658746693566e-05	0.000152062949495324	1.10835964916074e-07	3.10449834799474e-05	0.000999000999000999	0.0219150291443114	Arecales
Arecales - Fabales	metastat	bASV1367|Bradyrhizobium	Bacteria	0.000380286525279995	2.26806874715187e-07	6.66872823097959e-05	0.000103510265924203	1.0680644515852e-07	3.04754277579596e-05	0.000999000999000999	0.0219150291443114	Arecales
Arecales - Fabales	metastat	bASV4826|uncultured_bacterium	Bacteria	0.000360419326623746	1.70667677852051e-07	5.78482934573057e-05	0.000106836638221448	9.48352801645797e-08	2.871680013732e-05	0.000999000999000999	0.0219150291443114	Arecales
Arecales - Fabales	metastat	bASV3627|uncultured_bacterium	Bacteria	0.000423617641276752	1.87661939425058e-07	6.06600846609991e-05	0.000195388647991687	1.79443520966368e-07	3.95016258296517e-05	0.000999000999000999	0.0219150291443114	Arecales
Arecales - Fabales	metastat	bASV1984|Xanthobacteraceae	Bacteria	0.000340426889979568	1.67424647830252e-07	5.72960402817309e-05	0.000114299658712498	9.11857316031174e-08	2.81588246424544e-05	0.000999000999000999	0.0219150291443114	Arecales
Arecales - Fabales	metastat	bASV3352|uncultured_bacterium	Bacteria	0.0004625193940774	2.41195869582207e-07	6.87701299702255e-05	0.000142193117818986	1.40084317841646e-07	3.49016404051562e-05	0.000999000999000999	0.0219150291443114	Arecales
Arecales - Fabales	metastat	bASV4745|Bryobacter	Bacteria	0.000404305851884569	1.99646103647563e-07	6.25669999543334e-05	0.000113691224631058	1.04469445776853e-07	3.0140171918504e-05	0.000999000999000999	0.0219150291443114	Arecales
Arecales - Fabales	metastat	bASV5331|uncultured_soil	Bacteria	0.000292718632024737	1.1229613483349e-07	4.69242474285427e-05	0.000109430999772062	7.43801795553342e-08	2.54319517545623e-05	0.000999000999000999	0.0219150291443114	Arecales
Arecales - Fabales	metastat	bASV4491|Paenibacillus	Bacteria	0.000311294365795802	1.66658411319696e-07	5.71647792496455e-05	5.83353275341153e-05	3.67115026378349e-08	1.78670215122808e-05	0.000999000999000999	0.0219150291443114	Arecales
Arecales - Fabales	metastat	bASV4174|Ramlibacter	Bacteria	0.000350128133815669	1.28444172225959e-07	5.0184790334335e-05	0.000126005897747007	9.32988341287573e-08	2.84832268153607e-05	0.000999000999000999	0.0219150291443114	Arecales
Arecales - Fabales	metastat	bASV3251|Xanthobacteraceae	Bacteria	2.10878306080786e-05	1.11839903886949e-08	1.48085762040142e-05	0.000194152410522813	1.66306421613405e-07	3.80281842406169e-05	0.000999000999000999	0.0219150291443114	Fabales
Arecales - Fabales	metastat	bASV1|Pseudomonas	Bacteria	0.00145266889080067	1.73098395269254e-06	0.000184230458441325	0.00224054977794783	2.68058076668144e-06	0.000152674156199217	0.001998001998002	0.0286414242282089	Fabales
Arecales - Fabales	metastat	bASV18|Comamonas_testosteroni	Bacteria	0.00103310981430021	3.41992697478521e-07	8.1888577752001e-05	0.00162727766953637	1.93522078951558e-06	0.000129722807807081	0.001998001998002	0.0286414242282089	Fabales
Arecales - Fabales	metastat	bASV110|Acidibacter	Bacteria	0.0010038533076536	2.26234774385533e-07	6.66031228122509e-05	0.00141187664870324	9.87526184444392e-07	9.2667061098105e-05	0.001998001998002	0.0286414242282089	Fabales
Arecales - Fabales	metastat	bASV95|Xanthobacteraceae	Bacteria	0.000939495774518803	2.82895156362455e-07	7.44779420381916e-05	0.00133858927231269	1.2140026082484e-06	0.000102745045717793	0.001998001998002	0.0286414242282089	Fabales
Arecales - Fabales	metastat	bASV207|uncultured_bacterium	Bacteria	0.000836678976253362	2.62796904359787e-07	7.17835669052666e-05	0.00117730569213268	7.72919622462408e-07	8.19819504240128e-05	0.001998001998002	0.0286414242282089	Fabales
Arecales - Fabales	metastat	bASV502|uncultured_Myxococcales	Bacteria	0.00098142245249133	1.91270211742778e-07	6.12404793309288e-05	0.00070693527681821	4.77558798884929e-07	6.44413315170864e-05	0.001998001998002	0.0286414242282089	Arecales
Arecales - Fabales	metastat	bASV113|Agromyces	Bacteria	0.000819249770245804	2.39915140156594e-07	6.85873051988705e-05	0.00119767123226224	9.08419638237299e-07	8.88780130407035e-05	0.001998001998002	0.0286414242282089	Fabales
Arecales - Fabales	metastat	bASV114|Dongia	Bacteria	0.000781872757125031	3.51095617278208e-07	8.29712467651824e-05	0.00125954795043208	1.28784921413837e-06	0.000105823857511407	0.001998001998002	0.0286414242282089	Fabales
Arecales - Fabales	metastat	bASV56|Allorhizobium-Neorhizobium-Pararhizobium-Rhizobium	Bacteria	0.000691678845011022	4.5997656231043e-07	9.49691964828421e-05	0.00119414711839366	1.71843250832765e-06	0.000122241119827831	0.001998001998002	0.0286414242282089	Fabales
Arecales - Fabales	metastat	bASV531|Gemmatimonadaceae	Bacteria	0.000500476733945911	3.05019587129428e-07	7.73354783926762e-05	0.00105385357905567	1.11754868230826e-06	9.85789766064117e-05	0.001998001998002	0.0286414242282089	Fabales
Arecales - Fabales	metastat	bASV366|Agromyces	Bacteria	0.000699767394608167	1.77148162877911e-07	5.89363503261184e-05	0.00111154825136945	1.00821046124599e-06	9.36325129914581e-05	0.001998001998002	0.0286414242282089	Fabales
Arecales - Fabales	metastat	bASV489|Novosphingobium	Bacteria	0.000448576032593667	2.19009427778749e-07	6.55309278544541e-05	0.000821277047160828	9.42197351206657e-07	9.05153050333217e-05	0.001998001998002	0.0286414242282089	Fabales
Arecales - Fabales	metastat	bASV631|uncultured_Solirubrobacter	Bacteria	0.000305506340819739	1.84396564094061e-07	6.0130016662272e-05	0.000681822183902084	7.3281504220848e-07	7.9826716798678e-05	0.001998001998002	0.0286414242282089	Fabales
Arecales - Fabales	metastat	bASV545|Bacillales	Bacteria	0.000504953703649716	1.86718158818469e-07	6.05073579739654e-05	0.00026652348634442	2.27172799048614e-07	4.44456481998068e-05	0.001998001998002	0.0286414242282089	Arecales
Arecales - Fabales	metastat	bASV2490|metagenome	Bacteria	0.000196760888808203	9.88413529950003e-08	4.4023468116449e-05	0.00052507283989456	5.50756819628385e-07	6.92039719662029e-05	0.001998001998002	0.0286414242282089	Fabales
Arecales - Fabales	metastat	bASV1500|uncultured_Methylocystaceae	Bacteria	0.000585592900310542	2.45562906223777e-07	6.93899052136855e-05	0.000262522526622274	2.7150395063467e-07	4.85891337498658e-05	0.001998001998002	0.0286414242282089	Arecales
Arecales - Fabales	metastat	bASV1538|SC-I-84	Bacteria	0.000468621375957112	2.50873576179964e-07	7.01362226600413e-05	0.00016370624358556	1.25565858374441e-07	3.30435626006483e-05	0.001998001998002	0.0286414242282089	Arecales
Arecales - Fabales	metastat	bASV1780|Microtrichales	Bacteria	0.000403981204100872	1.98367197704518e-07	6.23662801212885e-05	0.000136331408822281	1.29795188918768e-07	3.35954433917003e-05	0.001998001998002	0.0286414242282089	Arecales
Arecales - Fabales	metastat	bASV2905|uncultured_bacterium	Bacteria	0.000421181329623049	1.69431943714264e-07	5.76384851881925e-05	0.000200844926216782	1.657331206275e-07	3.79625811908768e-05	0.001998001998002	0.0286414242282089	Arecales
Arecales - Fabales	metastat	bASV1019|Comamonas_koreensis	Bacteria	0.00017107024228004	1.12648564284052e-07	4.69978231210623e-05	0.00051026179253899	1.05926829646948e-06	9.59741041372725e-05	0.001998001998002	0.0286414242282089	Fabales
Arecales - Fabales	metastat	bASV3074|uncultured_bacterium	Bacteria	0.000402554329394518	1.51732594417352e-07	5.45449256131508e-05	0.000152568059390714	1.35808426763918e-07	3.43648489219053e-05	0.001998001998002	0.0286414242282089	Arecales
Arecales - Fabales	metastat	bASV3621|uncultured_bacterium	Bacteria	0.000483810202635334	2.57756557505786e-07	7.10918430424495e-05	0.000197682102325246	1.50747946015842e-07	3.62056860794763e-05	0.001998001998002	0.0286414242282089	Arecales
Arecales - Fabales	metastat	bASV1928|Micromonosporaceae	Bacteria	0.000490977012262909	2.0423357766437e-07	6.3281750562096e-05	0.000206896200004152	2.371314690414e-07	4.54093908159209e-05	0.001998001998002	0.0286414242282089	Arecales
Arecales - Fabales	metastat	bASV2149|ADurb.Bin063-1	Bacteria	0.000318434272462702	1.32106604389265e-07	5.08952411946353e-05	0.000102020917235468	7.2427214860145e-08	2.50958536086957e-05	0.001998001998002	0.0286414242282089	Arecales
Arecales - Fabales	metastat	bASV1885|uncultured_bacterium	Bacteria	0.000438397543493795	2.35546178273229e-07	6.79599331603655e-05	0.000203124467288438	1.38495813875938e-07	3.47031904154094e-05	0.001998001998002	0.0286414242282089	Arecales
Arecales - Fabales	metastat	bASV3008|Rhodocyclaceae	Bacteria	0.000473251396337748	2.44126876990144e-07	6.91867148346463e-05	0.000157712757386566	1.41952248003188e-07	3.51335647770158e-05	0.001998001998002	0.0286414242282089	Arecales
Arecales - Fabales	metastat	bASV1672|uncultured_prokaryote	Bacteria	0.000353846787286943	1.54615023960011e-07	5.50605769718299e-05	0.000134112452828773	1.23377182583111e-07	3.27543136997266e-05	0.001998001998002	0.0286414242282089	Arecales
Arecales - Fabales	metastat	bASV1656|Clostridium_sensu_stricto_1	Bacteria	0.000446616038986139	2.69585854951567e-07	7.27048633580525e-05	0.00016040188879289	1.73546590925237e-07	3.88471464930725e-05	0.001998001998002	0.0286414242282089	Arecales
Arecales - Fabales	metastat	bASV1981|KF-JG30-B3	Bacteria	0.000304099669606352	1.77221043569147e-07	5.89484726089188e-05	7.35986220114648e-05	4.77979035999512e-08	2.03871024019453e-05	0.001998001998002	0.0286414242282089	Arecales
Arecales - Fabales	metastat	bASV1930|Sphingomonas	Bacteria	0.000296150199802509	1.50515525657047e-07	5.43257288658408e-05	0.000103536777209063	7.66013270672488e-08	2.58088840564048e-05	0.001998001998002	0.0286414242282089	Arecales
Arecales - Fabales	metastat	bASV3330|uncultured_bacterium	Bacteria	0.000324148349422661	2.02971010208383e-07	6.30858441298533e-05	9.32953853234355e-05	7.38406413349228e-08	2.53395448528018e-05	0.001998001998002	0.0286414242282089	Arecales
Arecales - Fabales	metastat	bASV5315|uncultured_bacterium	Bacteria	0.000343435754716451	2.10366631951101e-07	6.4224885524303e-05	0.000125626301076488	8.54007305201096e-08	2.72509641664465e-05	0.001998001998002	0.0286414242282089	Arecales
Arecales - Fabales	metastat	bASV2347|Xanthobacteraceae	Bacteria	0.000337223355094899	2.19468387731427e-07	6.55995557928868e-05	9.19882554500749e-05	1.00822292314619e-07	2.96093834002756e-05	0.001998001998002	0.0286414242282089	Arecales
Arecales - Fabales	metastat	bASV1079|Alcaligenaceae	Bacteria	4.43279262127469e-05	2.37839565199755e-08	2.15951867004426e-05	0.00032946324926453	6.44783324960881e-07	7.48786452962323e-05	0.001998001998002	0.0286414242282089	Fabales
Arecales - Fabales	metastat	bASV2765|Rhizobiaceae	Bacteria	8.35096987569597e-05	5.48451059575171e-08	3.27932040895842e-05	0.000374672093258507	5.59183061820131e-07	6.97313516800841e-05	0.001998001998002	0.0286414242282089	Fabales
Arecales - Fabales	metastat	bASV7|Bacillus	Bacteria	0.00127570176467223	8.61187729751679e-07	0.000129946273192807	0.00188200490495318	1.73745046134285e-06	0.000122915681998849	0.002997002997003	0.0349933529884972	Fabales
Arecales - Fabales	metastat	bASV80|uncultured_soil	Bacteria	0.000973499529509548	2.35249058510766e-07	6.79170570436176e-05	0.00138630563679282	1.32810609448904e-06	0.000107465104325687	0.002997002997003	0.0349933529884972	Fabales
Arecales - Fabales	metastat	bASV61|Nocardioides	Bacteria	0.000958341336513352	2.54126842141808e-07	7.05895123774241e-05	0.00134594224488485	1.17532257468442e-06	0.000101094986530508	0.002997002997003	0.0349933529884972	Fabales
Arecales - Fabales	metastat	bASV94|uncultured_bacterium	Bacteria	0.000931338745745892	2.41695871530019e-07	6.88413737216416e-05	0.00130960516492668	1.18201975218136e-06	0.000101382605153271	0.002997002997003	0.0349933529884972	Fabales
Arecales - Fabales	metastat	bASV26|Methyloligellaceae	Bacteria	0.000858725905397116	3.24709878599992e-07	7.97926084590905e-05	0.00120685803348052	8.70672409349243e-07	8.7011863726298e-05	0.002997002997003	0.0349933529884972	Fabales
Arecales - Fabales	metastat	bASV572|Xanthobacteraceae	Bacteria	0.00060143846272158	1.95469295998555e-07	6.19090566402793e-05	0.000894879434366239	6.94856510904146e-07	7.77317858382353e-05	0.002997002997003	0.0349933529884972	Fabales
Arecales - Fabales	metastat	bASV639|Bosea	Bacteria	0.000591178361626038	3.32570657286946e-07	8.07526673252109e-05	0.00100850202080986	1.31536842259747e-06	0.00010694852165157	0.002997002997003	0.0349933529884972	Fabales
Arecales - Fabales	metastat	bASV1438|Terriglobus_albidus	Bacteria	0.000551149107972106	2.04705949630194e-07	6.33548904948279e-05	0.000910991897181505	9.6703100190335e-07	9.17004102168696e-05	0.002997002997003	0.0349933529884972	Fabales
Arecales - Fabales	metastat	bASV1324|Methylobacterium-Methylorubrum	Bacteria	0.000470351924623128	2.17818162168373e-07	6.53524625109308e-05	0.000921257982299952	1.59732773005617e-06	0.000117855022584167	0.002997002997003	0.0349933529884972	Fabales
Arecales - Fabales	metastat	bASV272|Sphingomonas	Bacteria	0.0006218640625194	1.74384920226563e-07	5.84748848763737e-05	0.000383830512852185	2.4717993482931e-07	4.63615221670533e-05	0.002997002997003	0.0349933529884972	Arecales
Arecales - Fabales	metastat	bASV1180|Microtrichales	Bacteria	0.000483518367976262	2.49921803870261e-07	7.00030536967343e-05	0.00018327756363463	1.71340796545996e-07	3.85994814727501e-05	0.002997002997003	0.0349933529884972	Arecales
Arecales - Fabales	metastat	bASV1716|uncultured_bacterium	Bacteria	0.000450199376506605	2.25223942509838e-07	6.6454162664855e-05	0.000204439704088169	1.65420251145046e-07	3.79267315554434e-05	0.002997002997003	0.0349933529884972	Arecales
Arecales - Fabales	metastat	bASV3518|uncultured_Bradyrhizobiaceae	Bacteria	0.000550984557574151	1.7953022144196e-07	5.93312769155578e-05	0.000277440736625905	2.29417151328542e-07	4.46646588555535e-05	0.002997002997003	0.0349933529884972	Arecales
Arecales - Fabales	metastat	bASV1696|uncultured_Acidobacteria	Bacteria	0.000453776058438357	2.1994434634337e-07	6.56706497761889e-05	0.00017912148373128	1.96108298579775e-07	4.12951516871849e-05	0.002997002997003	0.0349933529884972	Arecales
Arecales - Fabales	metastat	bASV1626|MND1	Bacteria	0.000589208441474062	2.43777345593057e-07	6.91371676654825e-05	0.000334511046140737	3.01455106423437e-07	5.11991088936921e-05	0.002997002997003	0.0349933529884972	Arecales
Arecales - Fabales	metastat	bASV2327|metagenome	Bacteria	0.000375553915552411	1.99169157270374e-07	6.24922202640996e-05	0.000119975753525118	1.06175606018431e-07	3.03852947869641e-05	0.002997002997003	0.0349933529884972	Arecales
Arecales - Fabales	metastat	bASV1120|Comamonadaceae	Bacteria	0.000215457911502769	1.49944533887233e-07	5.42225866198734e-05	0.000576794887180203	1.00241789323767e-06	9.33631476145779e-05	0.002997002997003	0.0349933529884972	Fabales
Arecales - Fabales	metastat	bASV2334|S085	Bacteria	0.000448991282820606	1.92218922161913e-07	6.13921694824593e-05	0.000201587727660651	2.1676702892089e-07	4.3415788444627e-05	0.002997002997003	0.0349933529884972	Arecales
Arecales - Fabales	metastat	bASV3089|uncultured_bacterium	Bacteria	0.000136437341961335	1.22805139856994e-07	4.90708051570849e-05	0.000371177907591926	3.51662914962046e-07	5.52986291961592e-05	0.002997002997003	0.0349933529884972	Fabales
Arecales - Fabales	metastat	bASV2285|uncultured_bacterium	Bacteria	0.000401603894643302	2.13292598665105e-07	6.46699916264324e-05	0.0001717062538185	1.69800701942923e-07	3.84256144125496e-05	0.002997002997003	0.0349933529884972	Arecales
Arecales - Fabales	metastat	bASV3335|metagenome	Bacteria	0.000273677435941209	1.4495244403931e-07	5.33123323920884e-05	8.24232083362879e-05	6.38406218144658e-08	2.35613208854028e-05	0.002997002997003	0.0349933529884972	Arecales
Arecales - Fabales	metastat	bASV1359|uncultured_actinobacterium	Bacteria	0.000340127337283681	2.08713910972784e-07	6.39721003791288e-05	8.11451420689692e-05	7.61186148063279e-08	2.57274366837409e-05	0.002997002997003	0.0349933529884972	Arecales
Arecales - Fabales	metastat	bASV5185|uncultured_bacterium	Bacteria	0.000290090850660325	1.48203529972937e-07	5.3906878671435e-05	5.66372190686321e-05	3.54881086175873e-08	1.75667939262856e-05	0.002997002997003	0.0349933529884972	Arecales
Arecales - Fabales	metastat	bASV29|Ensifer	Bacteria	0.00118895646212894	9.99749371933747e-07	0.000140010459828707	0.0017677693503168	1.7138418624998e-06	0.00012207773227493	0.003996003996004	0.0416227891661741	Fabales
Arecales - Fabales	metastat	bASV108|Variovorax	Bacteria	0.000925562705087491	2.7018659282528e-07	7.2785825061666e-05	0.0012670667945509	9.67207209542709e-07	9.17087644354913e-05	0.003996003996004	0.0416227891661741	Fabales
Arecales - Fabales	metastat	bASV320|uncultured_bacterium	Bacteria	0.000818335280917564	2.47619819061577e-07	6.96799151107035e-05	0.00115940860925887	8.33610186307587e-07	8.51397922757721e-05	0.003996003996004	0.0416227891661741	Fabales
Arecales - Fabales	metastat	bASV405|Actinospica	Bacteria	0.000521420335042983	2.66625266777594e-07	7.23045393277891e-05	0.000903649979803709	1.29479589140942e-06	0.00010610888138091	0.003996003996004	0.0416227891661741	Fabales
Arecales - Fabales	metastat	bASV1279|Pajaroellobacter	Bacteria	0.000542960095216694	1.62748302677865e-07	5.64902043699795e-05	0.000325742949300402	2.49585399225936e-07	4.65865626479993e-05	0.003996003996004	0.0416227891661741	Arecales
Arecales - Fabales	metastat	bASV1205|uncultured_bacterium	Bacteria	0.000508285413975034	2.17188131148766e-07	6.52578792701583e-05	0.000254393542275408	2.52125084737462e-07	4.68229862481594e-05	0.003996003996004	0.0416227891661741	Arecales
Arecales - Fabales	metastat	bASV197|Rhizobium_rhizogenes	Bacteria	0.000317595789943947	2.5022529340952e-07	7.00455444846241e-05	0.000746357237584241	1.6664078947576e-06	0.00012037650697987	0.003996003996004	0.0416227891661741	Fabales
Arecales - Fabales	metastat	bASV1023|Mesorhizobium_tamadayense	Bacteria	0.000351327422850821	2.11939687637668e-07	6.44645650707286e-05	0.000730358757845564	1.02800227773861e-06	9.45470794959066e-05	0.003996003996004	0.0416227891661741	Fabales
Arecales - Fabales	metastat	bASV1994|metagenome	Bacteria	0.000285001669770454	1.78015794633718e-07	5.90805025125187e-05	7.47648839036218e-05	9.73750659649845e-08	2.90987921406258e-05	0.003996003996004	0.0416227891661741	Arecales
Arecales - Fabales	metastat	bASV2568|Neochlamydia	Bacteria	0.000406144080401282	2.23688713835981e-07	6.62272845017083e-05	0.000156622221658509	1.43113497903436e-07	3.52769783167481e-05	0.003996003996004	0.0416227891661741	Arecales
Arecales - Fabales	metastat	bASV4518|Haliangium	Bacteria	0.00037164424284366	2.30093851264127e-07	6.71687735665455e-05	0.000135450912961829	1.09049853731775e-07	3.07938240182606e-05	0.003996003996004	0.0416227891661741	Arecales
Arecales - Fabales	metastat	bASV517|Agrobacterium_larrymoorei	Bacteria	0.000250382745462242	2.34864407704056e-07	6.78615094496534e-05	0.00069556434855945	1.88789550814448e-06	0.000128126822638811	0.003996003996004	0.0416227891661741	Fabales
Arecales - Fabales	metastat	bASV5426|uncultured_bacterium	Bacteria	0.000364036321946283	2.01997078269456e-07	6.29343072170601e-05	0.000136718908809047	1.07171845458344e-07	3.05275136711479e-05	0.003996003996004	0.0416227891661741	Arecales
Arecales - Fabales	metastat	bASV3004|Dokdonella	Bacteria	0.000291866539439879	2.01378836300896e-07	6.28379235283193e-05	8.03078813540155e-05	5.19378888961885e-08	2.12516779687769e-05	0.003996003996004	0.0416227891661741	Arecales
Arecales - Fabales	metastat	bASV3702|uncultured_bacterium	Bacteria	0.000251694518168255	1.46989149599226e-07	5.36855677833449e-05	6.86844948462523e-05	5.36162064291701e-08	2.15923107145295e-05	0.003996003996004	0.0416227891661741	Arecales
Arecales - Fabales	metastat	bASV118|Ilumatobacter	Bacteria	0.000932021837975043	2.3815390821728e-07	6.83350896307938e-05	0.00126381472505943	8.6891689905315e-07	8.69240997779172e-05	0.004995004995005	0.0469607767378101	Fabales
Arecales - Fabales	metastat	bASV77|Steroidobacter	Bacteria	0.000834160877610582	3.27996363601406e-07	8.01953941762643e-05	0.00116905230271814	9.30489424130018e-07	8.99511666613573e-05	0.004995004995005	0.0469607767378101	Fabales
Arecales - Fabales	metastat	bASV122|Nocardioides	Bacteria	0.000614078243735892	2.25299233998723e-07	6.64652694208835e-05	0.000925404751410109	8.97807041833929e-07	8.83573299453851e-05	0.004995004995005	0.0469607767378101	Fabales
Arecales - Fabales	metastat	bASV261|Microvirga	Bacteria	0.000751228021811144	3.2330682300442e-07	7.96200318429659e-05	0.00110667312475183	9.5317075811758e-07	9.10408774943183e-05	0.004995004995005	0.0469607767378101	Fabales
Arecales - Fabales	metastat	bASV347|Allorhizobium-Neorhizobium-Pararhizobium-Rhizobium	Bacteria	0.000513083070839007	2.50532238442693e-07	7.0088492865874e-05	0.000917028726543656	1.71378870739423e-06	0.000122075839129126	0.004995004995005	0.0469607767378101	Fabales
Arecales - Fabales	metastat	bASV1969|uncultured_bacterium	Bacteria	0.000623280622605377	2.08502778572472e-07	6.39397355009452e-05	0.000372059280760915	2.8783668336555e-07	5.00292682480922e-05	0.004995004995005	0.0469607767378101	Arecales
Arecales - Fabales	metastat	bASV2032|Gemmatimonas	Bacteria	0.000509168556173859	2.53412994141505e-07	7.04902988933138e-05	0.000235877741884415	2.93568820401132e-07	5.05249676032968e-05	0.004995004995005	0.0469607767378101	Arecales
Arecales - Fabales	metastat	bASV798|Nitrospira	Bacteria	0.000370012064115414	2.41864506951795e-07	6.88653854471191e-05	0.00012571780061831	1.18368445957696e-07	3.20825627781626e-05	0.004995004995005	0.0469607767378101	Arecales
Arecales - Fabales	metastat	bASV610|Gammaproteobacteria	Bacteria	0.000380772135110482	1.66702938975157e-07	5.71724153586697e-05	0.000179210906769722	1.3870633765171e-07	3.47295560947244e-05	0.004995004995005	0.0469607767378101	Arecales
Arecales - Fabales	metastat	bASV1373|Nocardioides	Bacteria	0.000458688297091389	2.30852300336466e-07	6.72793853484995e-05	0.000222027849447417	2.15618619343001e-07	4.33006295107369e-05	0.004995004995005	0.0469607767378101	Arecales
Arecales - Fabales	metastat	bASV2563|metagenome	Bacteria	0.000359598007948962	1.63221664092364e-07	5.65722969846973e-05	0.000157932466580642	1.05947247312501e-07	3.03526013944942e-05	0.004995004995005	0.0469607767378101	Arecales
Arecales - Fabales	metastat	bASV4002|Clostridium_sensu_stricto_8	Bacteria	0.000442275385364989	2.33164747922321e-07	6.76155145096039e-05	0.000196416153546185	1.48148179069799e-07	3.58921305496004e-05	0.004995004995005	0.0469607767378101	Arecales
Arecales - Fabales	metastat	bASV1419|Nakamurella	Bacteria	0.000246429077189184	1.5039163384624e-07	5.43033660615301e-05	6.74976082336495e-05	5.25855317415459e-08	2.13837670536495e-05	0.004995004995005	0.0469607767378101	Arecales
Arecales - Fabales	metastat	bASV2277|metagenome	Bacteria	0.00018614963031064	1.66155154858423e-07	5.70784040851726e-05	0.000463784311217707	6.12067579422632e-07	7.29542786791022e-05	0.004995004995005	0.0469607767378101	Fabales
Arecales - Fabales	metastat	bASV3287|Candidatus_Solibacter	Bacteria	0.000296796709970693	1.39511653224284e-07	5.23022237791173e-05	0.000114949310232982	8.87857667002301e-08	2.77857903472151e-05	0.004995004995005	0.0469607767378101	Arecales
Arecales - Fabales	metastat	bASV27|Mycobacterium	Bacteria	0.00123245254504292	7.80882270883618e-07	0.000123739310957146	0.00171793295128119	1.17792417970069e-06	0.000101206812784116	0.00599400599400599	0.0493088155747006	Fabales
Arecales - Fabales	metastat	bASV3|Enterobacteriaceae	Bacteria	0.00130725870688021	1.09238030305839e-06	0.000146353071811274	0.00192842206603859	2.47266190315464e-06	0.000146633583648217	0.00599400599400599	0.0493088155747006	Fabales
Arecales - Fabales	metastat	bASV19|Stenotrophomonas	Bacteria	0.00112742479786894	7.98803367565969e-07	0.000125151153125908	0.00169931622885232	2.23725133341435e-06	0.000139478885215628	0.00599400599400599	0.0493088155747006	Fabales
Arecales - Fabales	metastat	bASV39|Cupriavidus	Bacteria	0.000918334673372433	2.42404742522579e-07	6.89422524081524e-05	0.00138666968553586	2.24764409301382e-06	0.000139802472237076	0.00599400599400599	0.0493088155747006	Fabales
Arecales - Fabales	metastat	bASV160|Streptomyces	Bacteria	0.000713594471396788	2.24078839458003e-07	6.6285011386215e-05	0.00109459313481411	1.10716980930445e-06	9.81201485892125e-05	0.00599400599400599	0.0493088155747006	Fabales
Arecales - Fabales	metastat	bASV201|Variovorax_soli	Bacteria	0.000825709309938395	2.88984698963906e-07	7.52752724761e-05	0.001250247575395	1.32132871954441e-06	0.00010719055439991	0.00599400599400599	0.0493088155747006	Fabales
Arecales - Fabales	metastat	bASV157|Dongia	Bacteria	0.000702449196823939	3.34890279163622e-07	8.10337958017011e-05	0.00108372732860301	1.33136447186544e-06	0.000107596851087972	0.00599400599400599	0.0493088155747006	Fabales
Arecales - Fabales	metastat	bASV252|Rhizobiaceae	Bacteria	0.000705885413855072	3.36805124409578e-07	8.12651342658501e-05	0.00109102716154585	1.23980091100678e-06	0.000103831004459244	0.00599400599400599	0.0493088155747006	Fabales
Arecales - Fabales	metastat	bASV1503|Paludibaculum	Bacteria	0.000534636088469858	1.51436728682172e-07	5.44917206667128e-05	0.000313498178604023	2.61487843312591e-07	4.76844558860953e-05	0.00599400599400599	0.0493088155747006	Arecales
Arecales - Fabales	metastat	bASV1132|uncultured_bacterium	Bacteria	0.000459176936317934	2.34264315083919e-07	6.77747588916549e-05	0.000234882658426504	2.10507492382398e-07	4.27843421564476e-05	0.00599400599400599	0.0493088155747006	Arecales
Arecales - Fabales	metastat	bASV668|Sphingobium	Bacteria	0.000381436196050152	2.10408909898349e-07	6.42313389239834e-05	0.000710763885662374	1.32179635172406e-06	0.000107209520656235	0.00599400599400599	0.0493088155747006	Fabales
Arecales - Fabales	metastat	bASV1153|Reyranella	Bacteria	0.000248616052049949	1.40234125595892e-07	5.2437474549928e-05	0.000636928801266384	1.21866930527314e-06	0.000102942335283786	0.00599400599400599	0.0493088155747006	Fabales
Arecales - Fabales	metastat	bASV2393|uncultured_delta	Bacteria	0.000566644013546689	1.7329709955e-07	5.82922151244713e-05	0.000334120696790305	2.62695847726605e-07	4.77944737324492e-05	0.00599400599400599	0.0493088155747006	Arecales
Arecales - Fabales	metastat	bASV1354|Intrasporangiaceae	Bacteria	0.000532519163182009	2.4326423815036e-07	6.90643686900567e-05	0.00028445918941354	3.13039217470251e-07	5.21735579763852e-05	0.00599400599400599	0.0493088155747006	Arecales
Arecales - Fabales	metastat	bASV2430|NB1-j	Bacteria	0.000521993383841869	2.20013792973077e-07	6.56810165926851e-05	0.000291308280558074	2.65241097579076e-07	4.80254549876894e-05	0.00599400599400599	0.0493088155747006	Arecales
Arecales - Fabales	metastat	bASV2897|Sorangium	Bacteria	0.00036067632361554	1.39654328075257e-07	5.2328960990434e-05	0.000175502625695788	1.2280996093754e-07	3.26789336393448e-05	0.00599400599400599	0.0493088155747006	Arecales
Arecales - Fabales	metastat	bASV1452|Rhizobacter	Bacteria	0.000300192029082665	1.57373692216565e-07	5.55496054973664e-05	0.000697692786747874	1.38596503312257e-06	0.000109781008618248	0.00599400599400599	0.0493088155747006	Fabales
Arecales - Fabales	metastat	bASV4446|Citrifermentans	Bacteria	0.000370178035857486	1.63654317237591e-07	5.6647225714321e-05	0.000184753054380332	1.26489333742052e-07	3.31648496141757e-05	0.00599400599400599	0.0493088155747006	Arecales
Arecales - Fabales	metastat	bASV4310|CL500-29_marine_group	Bacteria	0.000309004169414074	1.49935273121314e-07	5.4220912165918e-05	0.000153814168324391	9.55095634328406e-08	2.88187082100199e-05	0.00599400599400599	0.0493088155747006	Arecales
Arecales - Fabales	metastat	bASV1467|uncultured_Chloroflexi	Bacteria	0.000559174203496536	3.4095301668105e-07	8.17640096145968e-05	0.000249176791870765	2.75019279833331e-07	4.89026788484098e-05	0.00599400599400599	0.0493088155747006	Arecales
Arecales - Fabales	metastat	bASV3476|Flavobacterium	Bacteria	0.00035279658592119	1.91538049144571e-07	6.12833421285308e-05	0.000137012684349547	1.01990617960369e-07	2.97804455773553e-05	0.00599400599400599	0.0493088155747006	Arecales
Arecales - Fabales	metastat	bASV1737|Chitinophaga	Bacteria	0.000192573794178338	1.20856295676545e-07	4.86798858644451e-05	0.000550110520730311	1.26292346033871e-06	0.000104794766727066	0.00599400599400599	0.0493088155747006	Fabales
Arecales - Fabales	metastat	bASV41|Nordella	Bacteria	0.00114265579691247	6.93304061992301e-07	0.000116594156345705	0.0016763491063039	1.35747549655179e-06	0.000108646834986686	0.00699300699300699	0.0538550184291056	Fabales
Arecales - Fabales	metastat	bASV328|Xanthomonadaceae	Bacteria	0.000612160951293254	2.10294844255864e-07	6.42139262056326e-05	0.000917733162709194	8.95509736804466e-07	8.82442133491146e-05	0.00699300699300699	0.0538550184291056	Fabales
Arecales - Fabales	metastat	bASV1558|Chthoniobacter	Bacteria	0.000472780033152521	1.38435664187995e-07	5.21001419191916e-05	0.000724217527780267	6.73080675682598e-07	7.65040877386185e-05	0.00699300699300699	0.0538550184291056	Fabales
Arecales - Fabales	metastat	bASV2046|uncultured_bacterium	Bacteria	0.000472032815997013	1.52651243636911e-07	5.47097947349414e-05	0.000280648174400258	2.04083644833286e-07	4.21264808624535e-05	0.00699300699300699	0.0538550184291056	Arecales
Arecales - Fabales	metastat	bASV1327|uncultured_bacterium	Bacteria	0.00050557827542895	2.29290819723755e-07	6.70514610277508e-05	0.000278378248706486	2.2072213047675e-07	4.38100773077482e-05	0.00699300699300699	0.0538550184291056	Arecales
Arecales - Fabales	metastat	bASV1198|mle1-7	Bacteria	0.000361040092248774	1.68122012510032e-07	5.741524230739e-05	0.000161025050091466	1.61734273543582e-07	3.75017997879501e-05	0.00699300699300699	0.0538550184291056	Arecales
Arecales - Fabales	metastat	bASV3532|Pedosphaeraceae	Bacteria	0.000482221597664906	1.83792668362637e-07	6.00314735037556e-05	0.000263768481386568	1.9880359947261e-07	4.15779623350609e-05	0.00699300699300699	0.0538550184291056	Arecales
Arecales - Fabales	metastat	bASV2151|Xanthobacteraceae	Bacteria	0.000331422770868745	1.51544661609562e-07	5.45111360469461e-05	0.000136895412024962	1.20492889717712e-07	3.23691868667547e-05	0.00699300699300699	0.0538550184291056	Arecales
Arecales - Fabales	metastat	bASV1506|uncultured_soil	Bacteria	0.000419392978369388	2.79633880377659e-07	7.4047398754494e-05	0.000175819602036514	2.20702990199771e-07	4.38081777356665e-05	0.00699300699300699	0.0538550184291056	Arecales
Arecales - Fabales	metastat	bASV2989|MND1	Bacteria	0.000362247398104095	1.88262846669283e-07	6.07571260517182e-05	0.00015560232341354	1.90851235218146e-07	4.0737893396918e-05	0.00699300699300699	0.0538550184291056	Arecales
Arecales - Fabales	metastat	bASV4005|uncultured_Kofleriaceae	Bacteria	0.000314907886480272	1.78740075309136e-07	5.9200568907762e-05	9.82553966134244e-05	1.02025412179558e-07	2.97855249611879e-05	0.00699300699300699	0.0538550184291056	Arecales
Arecales - Fabales	metastat	bASV2107|Luteimonas	Bacteria	6.63074930161277e-05	4.28353443530261e-08	2.89811785958479e-05	0.000227105692494122	2.47967492681162e-07	4.64353213275488e-05	0.00699300699300699	0.0538550184291056	Fabales
Arecales - Fabales	metastat	bASV81|Bradyrhizobium	Bacteria	0.000914713933784261	2.20659312752247e-07	6.57772999690663e-05	0.00128723511079913	1.79360941797692e-06	0.000124886362884752	0.00799200799200799	0.0567212519029236	Fabales
Arecales - Fabales	metastat	bASV131|67-14	Bacteria	0.000700681241563233	2.45747949237954e-07	6.94160445427416e-05	0.00101181163176911	9.24197430128045e-07	8.96465247090917e-05	0.00799200799200799	0.0567212519029236	Fabales
Arecales - Fabales	metastat	bASV295|Niastella	Bacteria	0.000639907952231394	2.90057600017229e-07	7.5414878650744e-05	0.00106259548636742	1.68149854800439e-06	0.0001209203312284	0.00799200799200799	0.0567212519029236	Fabales
Arecales - Fabales	metastat	bASV412|Lysobacter	Bacteria	0.000649617124436824	3.18425358517899e-07	7.90166721695055e-05	0.00100857172487353	1.25600407247804e-06	0.000104507294210918	0.00799200799200799	0.0567212519029236	Fabales
Arecales - Fabales	metastat	bASV100|Allorhizobium-Neorhizobium-Pararhizobium-Rhizobium	Bacteria	0.00065328492758448	3.34825655665936e-07	8.10259769125075e-05	0.00105260222771457	1.79645418167189e-06	0.000124985361983675	0.00799200799200799	0.0567212519029236	Fabales
Arecales - Fabales	metastat	bASV298|Steroidobacter	Bacteria	0.000548345901736684	3.79308074567929e-07	8.62404384660823e-05	0.000962314120936292	1.36491975299733e-06	0.000108944331735837	0.00799200799200799	0.0567212519029236	Fabales
Arecales - Fabales	metastat	bASV477|Rhodanobacteraceae	Bacteria	0.000442648467110839	2.45629994244505e-07	6.93993832605959e-05	0.000757952939466795	1.01278759890025e-06	9.38448117164136e-05	0.00799200799200799	0.0567212519029236	Fabales
Arecales - Fabales	metastat	bASV637|uncultured_Nocardioidaceae	Bacteria	0.000647374550655514	3.71012579567494e-07	8.52921828898037e-05	0.0010882576125586	1.68949649378933e-06	0.000121207565188967	0.00799200799200799	0.0567212519029236	Fabales
Arecales - Fabales	metastat	bASV2276|Chelatococcus	Bacteria	0.00035415635748141	1.97334443354802e-07	6.22037202334271e-05	0.000659769463626465	8.90673085807196e-07	8.80055870660789e-05	0.00799200799200799	0.0567212519029236	Fabales
Arecales - Fabales	metastat	bASV2711|metagenome	Bacteria	0.000442655298656279	1.94256074965439e-07	6.17166318457282e-05	0.000208974770975078	1.62255055808291e-07	3.75621289168725e-05	0.00799200799200799	0.0567212519029236	Arecales
Arecales - Fabales	metastat	bASV1322|uncultured_bacterium	Bacteria	0.000336413461599102	1.82798653520896e-07	5.9868917845065e-05	0.000135428695966464	1.40976054815279e-07	3.50125511427568e-05	0.00799200799200799	0.0567212519029236	Arecales
Arecales - Fabales	metastat	bASV2027|uncultured_Rhodospirillales	Bacteria	0.000214402640016434	1.65278802669213e-07	5.69276807594621e-05	0.000478406283547973	6.88658431190757e-07	7.7384327769048e-05	0.00799200799200799	0.0567212519029236	Fabales
Arecales - Fabales	metastat	bASV1170|uncultured_Sphingomonadaceae	Bacteria	0.000174416193668466	1.34951667108362e-07	5.14403646932233e-05	0.000415805341490384	5.42340806418937e-07	6.86731899094442e-05	0.00799200799200799	0.0567212519029236	Fabales
Arecales - Fabales	metastat	bASV3188|Candidatus_Alysiosphaera	Bacteria	0.000315127532259996	1.35085442178408e-07	5.14658543148847e-05	0.0001255306010291	1.47791775555881e-07	3.58489312867059e-05	0.00799200799200799	0.0567212519029236	Arecales
Arecales - Fabales	metastat	bASV2702|SC-I-84	Bacteria	0.000269195052021471	1.33990455727905e-07	5.12568418633265e-05	8.88332740988494e-05	1.02682815984654e-07	2.98813328357433e-05	0.00799200799200799	0.0567212519029236	Arecales
Arecales - Fabales	metastat	bASV3553|Microvirga_ossetica	Bacteria	7.72503285056688e-05	3.88560227618755e-08	2.76022245344911e-05	0.000311423939522051	5.25463228015949e-07	6.75961941310918e-05	0.00799200799200799	0.0567212519029236	Fabales
Arecales - Fabales	metastat	bASV11|Acinetobacter	Bacteria	0.000514799590074445	3.22866554054721e-07	7.9565801360704e-05	0.000970349294023157	2.14048446931049e-06	0.000136429133357897	0.00899100899100899	0.0597134280354172	Fabales
Arecales - Fabales	metastat	bASV1719|uncultured_bacterium	Bacteria	0.000482525254232246	2.14277086371756e-07	6.48190673913581e-05	0.000272741313594451	2.23656142873822e-07	4.41002950669239e-05	0.00899100899100899	0.0597134280354172	Arecales
Arecales - Fabales	metastat	bASV1855|Subgroup_5	Bacteria	0.000405323438235074	1.83148581498271e-07	5.99261934118033e-05	0.000214505306696837	1.33139389803882e-07	3.40254878639761e-05	0.00899100899100899	0.0597134280354172	Arecales
Arecales - Fabales	metastat	bASV3506|metagenome	Bacteria	0.000357429961694719	1.6405815417994e-07	5.67170746120412e-05	0.000178265020990808	1.04233151605705e-07	3.0106066354706e-05	0.00899100899100899	0.0597134280354172	Arecales
Arecales - Fabales	metastat	bASV1927|uncultured_bacterium	Bacteria	0.00041789367630169	2.60457427288922e-07	7.14633359018047e-05	0.000185510252934655	1.69525118546296e-07	3.83944197197973e-05	0.00899100899100899	0.0597134280354172	Arecales
Arecales - Fabales	metastat	bASV1570|Solirubrobacter_sp.	Bacteria	0.000327467470390439	1.93904755785979e-07	6.16607982029036e-05	0.00013719802918292	1.12407409953181e-07	3.12642885529691e-05	0.00899100899100899	0.0597134280354172	Arecales
Arecales - Fabales	metastat	bASV1387|Hyphomicrobium	Bacteria	0.000145232099490535	9.62319282749694e-08	4.34384686011278e-05	0.000399918911858574	6.40019858726379e-07	7.46015420476115e-05	0.00899100899100899	0.0597134280354172	Fabales
Arecales - Fabales	metastat	bASV4457|A0839	Bacteria	0.000166011954138285	1.33614492666406e-07	5.11848807077518e-05	0.000390972857094323	4.26756921995078e-07	6.09174010975431e-05	0.00899100899100899	0.0597134280354172	Fabales
Arecales - Fabales	metastat	bASV3185|Gemmatimonas	Bacteria	0.000211799214257972	1.10295733772671e-07	4.65044239457168e-05	6.91199316339062e-05	4.20652728689117e-08	1.91255060447769e-05	0.00899100899100899	0.0597134280354172	Arecales
Arecales - Fabales	metastat	bASV1714|Mesorhizobium	Bacteria	0.00026689204141451	1.5630598408002e-07	5.53608455251118e-05	0.000103787854615363	7.68472949779591e-08	2.58502871866915e-05	0.00899100899100899	0.0597134280354172	Arecales
Arecales - Fabales	metastat	bASV5969|uncultured_bacterium	Bacteria	0.000364369246894444	1.43885379364687e-07	5.31157410597573e-05	0.000171298775180501	1.43835300914426e-07	3.53658273914518e-05	0.00899100899100899	0.0597134280354172	Arecales
Arecales - Fabales	metastat	bASV3757|Enterobacteriaceae	Bacteria	0.000153382564361792	1.07382100569611e-07	4.58860696041605e-05	0.000373519089776341	4.8053299892196e-07	6.46416879166432e-05	0.00899100899100899	0.0597134280354172	Fabales
Arecales - Fabales	metastat	bASV1825|Nocardioides	Bacteria	0.000444295977279274	2.24240061560298e-07	6.63088527435267e-05	0.000208860432450615	2.75327406074081e-07	4.89300659836661e-05	0.00899100899100899	0.0597134280354172	Arecales
Arecales - Fabales	metastat	bASV1765|Lysinimonas	Bacteria	4.08601433345325e-05	2.87655099011124e-08	2.37493074826228e-05	0.000255489377118283	5.1096448230941e-07	6.66571032327851e-05	0.00899100899100899	0.0597134280354172	Fabales
Arecales - Fabales	metastat	bASV128|metagenome	Bacteria	0.00088598657889962	3.04418319833688e-07	7.72592173362224e-05	0.00120376392400385	8.58200116841733e-07	8.63863977236419e-05	0.00999000999000999	0.0628866053706326	Fabales
Arecales - Fabales	metastat	bASV198|Reyranella	Bacteria	0.000990517767908653	2.235658900473e-07	6.62090998495542e-05	0.00129303692595224	1.10658903166212e-06	9.80944102321892e-05	0.00999000999000999	0.0628866053706326	Fabales
Arecales - Fabales	metastat	bASV13|Enterobacteriaceae	Bacteria	0.000851733300254233	3.79934625009101e-07	8.63116361192987e-05	0.00129283744785995	1.98111587692267e-06	0.000131252026963153	0.00999000999000999	0.0628866053706326	Fabales
Arecales - Fabales	metastat	bASV476|Allorhizobium-Neorhizobium-Pararhizobium-Rhizobium	Bacteria	0.000519661070392427	2.41373027196824e-07	6.87953810574496e-05	0.000857165968164906	1.47064907940409e-06	0.000113085157577745	0.00999000999000999	0.0628866053706326	Fabales
Arecales - Fabales	metastat	bASV634|uncultured_Alphaproteobacteria	Bacteria	0.000472118250914559	3.26959503369011e-07	8.00685372308895e-05	0.00076121606564771	7.2633574202625e-07	7.94730329995106e-05	0.00999000999000999	0.0628866053706326	Fabales
Arecales - Fabales	metastat	bASV248|Flavobacterium_johnsoniae	Bacteria	0.000363963073713503	1.86457938891442e-07	6.0465180207118e-05	0.000634071675350682	7.74891356073379e-07	8.20864526276163e-05	0.00999000999000999	0.0628866053706326	Fabales
Arecales - Fabales	metastat	bASV1262|uncultured_bacterium	Bacteria	0.000446892208164151	2.59712230466137e-07	7.13610305125045e-05	0.000206688078702162	2.10601220891096e-07	4.27938659654675e-05	0.00999000999000999	0.0628866053706326	Arecales
Arecales - Fabales	metastat	bASV2583|Clostridium_magnum	Bacteria	0.000552210396009822	2.7429372085697e-07	7.33369501145054e-05	0.000321142103951219	2.8111688952808e-07	4.9441831393553e-05	0.00999000999000999	0.0628866053706326	Arecales
Arecales - Fabales	metastat	bASV1290|Nocardioides	Bacteria	0.000548264972938483	2.27829970864595e-07	6.68375218771487e-05	0.000310926144671444	2.58447345827356e-07	4.74064154370029e-05	0.00999000999000999	0.0628866053706326	Arecales
Arecales - Fabales	metastat	bASV2398|Desulfobacterota	Bacteria	0.000375382514499052	2.17221870635205e-07	6.52629478754689e-05	0.000179775061230827	1.91690255000795e-07	4.08273411161639e-05	0.00999000999000999	0.0628866053706326	Arecales
Arecales - Fabales	metastat	bASV2650|uncultured_soil	Bacteria	0.00034120302557778	1.72813478470067e-07	5.82108201097051e-05	0.000160004644585828	1.48831941693605e-07	3.59748634095488e-05	0.00999000999000999	0.0628866053706326	Arecales
Arecales - Fabales	metastat	bASV3481|uncultured_subdivision	Bacteria	0.000245012870626171	1.24905106818635e-07	4.94885819310056e-05	8.21211858504469e-05	6.76793841948697e-08	2.4259356634157e-05	0.00999000999000999	0.0628866053706326	Arecales
Arecales - Fabales	metastat	bASV562|Rhizobium_etli	Bacteria	0.000460850292778312	1.99780080857625e-07	6.25879899613688e-05	0.000789116129287945	1.21767478245341e-06	0.000102900322492984	0.010989010989011	0.0665703395764437	Fabales
Arecales - Fabales	metastat	bASV980|metagenome	Bacteria	0.0004704505481384	1.96413173593657e-07	6.20583491394577e-05	0.000701538630884106	5.17963282684059e-07	6.71120596098702e-05	0.010989010989011	0.0665703395764437	Fabales
Arecales - Fabales	metastat	bASV646|uncultured_bacterium	Bacteria	0.000407860929383533	2.31116331546068e-07	6.73178488620448e-05	0.00065045742134273	5.22832121555339e-07	6.74267474700823e-05	0.010989010989011	0.0665703395764437	Fabales
Arecales - Fabales	metastat	bASV658|uncultured_Truepera	Bacteria	0.000589387997570291	2.44306404594539e-07	6.92121496466946e-05	0.000345004037681444	3.2934676132495e-07	5.35152770812833e-05	0.010989010989011	0.0665703395764437	Arecales
Arecales - Fabales	metastat	bASV2324|Conexibacter	Bacteria	0.00046757476385526	2.34638052335812e-07	6.78288001090364e-05	0.000236530381645622	1.90640628376442e-07	4.07154097925804e-05	0.010989010989011	0.0665703395764437	Arecales
Arecales - Fabales	metastat	bASV3134|uncultured_subdivision	Bacteria	0.000359541505307716	1.93014055562885e-07	6.15190159606154e-05	0.000169604687654067	1.20878242048297e-07	3.24209060367853e-05	0.010989010989011	0.0665703395764437	Arecales
Arecales - Fabales	metastat	bASV1493|MB-A2-108	Bacteria	0.000485024172592835	2.86805993384825e-07	7.49909789849033e-05	0.000241322437705462	2.32956478071723e-07	4.50078715889954e-05	0.010989010989011	0.0665703395764437	Arecales
Arecales - Fabales	metastat	bASV2012|Burkholderia-Caballeronia-Paraburkholderia	Bacteria	0.00028632527021647	2.24173890162721e-07	6.62990684231599e-05	9.49228287875101e-05	9.86204244568237e-08	2.92842774935665e-05	0.010989010989011	0.0665703395764437	Arecales
Arecales - Fabales	metastat	bASV4795|ADurb.Bin063-1	Bacteria	0.000292487576416328	1.22707092376784e-07	4.9051212208799e-05	0.000123675842315359	9.82523433991513e-08	2.92295775452004e-05	0.010989010989011	0.0665703395764437	Arecales
Arecales - Fabales	metastat	bASV375|metagenome	Bacteria	0.00092817090461744	2.20809128581362e-07	6.5799625808186e-05	0.0012288564457935	8.20464897386753e-07	8.44658355110542e-05	0.011988011988012	0.0677996214152133	Fabales
Arecales - Fabales	metastat	bASV133|Pseudorhodoplanes	Bacteria	0.000858647020692117	2.82663598171002e-07	7.44474545807246e-05	0.0012081489070209	1.34273530962976e-06	0.000108055352547534	0.011988011988012	0.0677996214152133	Fabales
Arecales - Fabales	metastat	bASV69|Comamonadaceae	Bacteria	0.000891468809963743	3.69405798629837e-07	8.5107290836486e-05	0.00131664851598021	2.10180650069551e-06	0.000135190895650992	0.011988011988012	0.0677996214152133	Fabales
Arecales - Fabales	metastat	bASV74|Comamonadaceae	Bacteria	0.000631399053376514	2.77802645431016e-07	7.38045438623246e-05	0.000937102265979642	1.0888801332856e-06	9.73063353442914e-05	0.011988011988012	0.0677996214152133	Fabales
Arecales - Fabales	metastat	bASV759|MND1	Bacteria	0.000629940208182547	2.62816800144257e-07	7.17862841430302e-05	0.000409498269965931	3.09658845596759e-07	5.18910937819282e-05	0.011988011988012	0.0677996214152133	Arecales
Arecales - Fabales	metastat	bASV1813|Chthoniobacter	Bacteria	0.000468225948350466	2.48666786763706e-07	6.98270674474301e-05	0.000804921320967638	1.28379179605655e-06	0.000105657024954476	0.011988011988012	0.0677996214152133	Fabales
Arecales - Fabales	metastat	bASV389|Gaiella	Bacteria	0.000388410035468872	2.74661950928955e-07	7.33861597958863e-05	0.000672738976834228	7.72817472255663e-07	8.19765328167637e-05	0.011988011988012	0.0677996214152133	Fabales
Arecales - Fabales	metastat	bASV361|Mesorhizobium	Bacteria	0.000366727754886819	1.72903313232363e-07	5.82259481998518e-05	0.000663709339752725	9.87420286913224e-07	9.26620923812042e-05	0.011988011988012	0.0677996214152133	Fabales
Arecales - Fabales	metastat	bASV982|Iamia	Bacteria	0.000547528264411494	1.49558778330394e-07	5.41527936980342e-05	0.000357351117208994	2.14183111726815e-07	4.31562491547022e-05	0.011988011988012	0.0677996214152133	Arecales
Arecales - Fabales	metastat	bASV1413|Nocardiaceae	Bacteria	0.000527898392397405	2.1909847206099e-07	6.55442481975658e-05	0.000317291192344587	2.59976097423071e-07	4.75464164445898e-05	0.011988011988012	0.0677996214152133	Arecales
Arecales - Fabales	metastat	bASV853|Xanthobacteraceae	Bacteria	0.000431703975392143	2.0855322514982e-07	6.39474700399185e-05	0.000226066193890804	1.93308052650632e-07	4.09992632649217e-05	0.011988011988012	0.0677996214152133	Arecales
Arecales - Fabales	metastat	bASV1368|Cellulosimicrobium	Bacteria	0.000425003621436479	1.67896149521142e-07	5.73766621821072e-05	0.000685992195114788	8.00999704667908e-07	8.34578625606911e-05	0.011988011988012	0.0677996214152133	Fabales
Arecales - Fabales	metastat	bASV1416|uncultured_Acidobacteriaceae	Bacteria	0.000581572610740887	9.03568897002305e-07	0.000133105361259882	0.00019200184410869	2.45745294680329e-07	4.62267845076413e-05	0.011988011988012	0.0677996214152133	Arecales
Arecales - Fabales	metastat	bASV186|Erwiniaceae	Bacteria	0.000275460967062047	2.26215510108868e-07	6.66002870671649e-05	0.000660208600824076	2.01468828969649e-06	0.000132359467383548	0.011988011988012	0.0677996214152133	Fabales
Arecales - Fabales	metastat	bASV2603|Xanthobacteraceae	Bacteria	0.000404572218975485	1.82089392368301e-07	5.97526588740258e-05	0.000223813228624442	1.81581481246232e-07	3.97362479625486e-05	0.011988011988012	0.0677996214152133	Arecales
Arecales - Fabales	metastat	bASV988|ADurb.Bin063-1	Bacteria	0.000400563831353704	2.09732875171916e-07	6.41280696504768e-05	0.000197626085495452	1.65216918890842e-07	3.79034148846825e-05	0.011988011988012	0.0677996214152133	Arecales
Arecales - Fabales	metastat	bASV2448|SC-I-84	Bacteria	0.000331987767261909	1.92250165036238e-07	6.13971585591868e-05	0.0001512574446331	1.400321792918e-07	3.48951447092073e-05	0.011988011988012	0.0677996214152133	Arecales
Arecales - Fabales	metastat	bASV206|metagenome	Bacteria	0.000896967615553569	2.71990195125261e-07	7.30283580596434e-05	0.00118222404965086	7.52924884049566e-07	8.09146025435387e-05	0.012987012987013	0.0688758058821215	Fabales
Arecales - Fabales	metastat	bASV337|Marmoricola	Bacteria	0.000786869010690511	1.99161564880285e-07	6.24910291413323e-05	0.00106427319238625	9.47829872251662e-07	9.07854552731047e-05	0.012987012987013	0.0688758058821215	Fabales
Arecales - Fabales	metastat	bASV331|uncultured_Acidimicrobiia	Bacteria	0.000606669949980165	1.84232163155589e-07	6.01032058711675e-05	0.000876759714727206	8.10166357408845e-07	8.39340505815932e-05	0.012987012987013	0.0688758058821215	Fabales
Arecales - Fabales	metastat	bASV1013|SWB02	Bacteria	0.000315994266044013	2.03831322664634e-07	6.32194005133498e-05	0.000572304978897895	6.25990498819967e-07	7.37793713846408e-05	0.012987012987013	0.0688758058821215	Fabales
Arecales - Fabales	metastat	bASV719|uncultured_bacterium	Bacteria	0.000550452312037221	2.69904844684302e-07	7.27478649621757e-05	0.000315593485571232	3.09501259104654e-07	5.1877888320191e-05	0.012987012987013	0.0688758058821215	Arecales
Arecales - Fabales	metastat	bASV884|Mesorhizobium	Bacteria	0.000282917594069402	1.94027899200818e-07	6.16803746079801e-05	0.000537115085402764	6.60465830194241e-07	7.57837788192423e-05	0.012987012987013	0.0688758058821215	Fabales
Arecales - Fabales	metastat	bASV923|Dongia	Bacteria	0.000512002095476438	2.50523905983362e-07	7.00873273185257e-05	0.000284788189503524	2.54521089551751e-07	4.70449451659517e-05	0.012987012987013	0.0688758058821215	Arecales
Arecales - Fabales	metastat	bASV1157|Hyphomicrobium	Bacteria	0.000288330087075663	1.95044769137337e-07	6.18417920017443e-05	0.000587901802028586	9.37667077278066e-07	9.02974349521608e-05	0.012987012987013	0.0688758058821215	Fabales
Arecales - Fabales	metastat	bASV2236|TK10	Bacteria	0.000483181035280028	2.07331797908497e-07	6.3759935466991e-05	0.000287243462331412	1.98044715604487e-07	4.14985296339298e-05	0.012987012987013	0.0688758058821215	Arecales
Arecales - Fabales	metastat	bASV1241|uncultured_bacterium	Bacteria	0.000574483249088346	9.27150027454371e-07	0.000134831050960181	0.00022009668243919	2.21326010107977e-07	4.38699669584891e-05	0.012987012987013	0.0688758058821215	Arecales
Arecales - Fabales	metastat	bASV4313|Blastocatellia	Bacteria	0.000497394699670422	3.19762943327024e-07	7.91824578670252e-05	0.000231484615166821	2.78511365930412e-07	4.92121729312198e-05	0.012987012987013	0.0688758058821215	Arecales
Arecales - Fabales	metastat	bASV3887|Candidatus_Solibacter	Bacteria	0.000315036854956741	1.4457934596621e-07	5.32436769634889e-05	0.000148211822648385	1.32893239310477e-07	3.39940198462685e-05	0.012987012987013	0.0688758058821215	Arecales
Arecales - Fabales	metastat	bASV1108|Rhizobiaceae	Bacteria	0.000165720934712153	1.34393554178289e-07	5.13338848031791e-05	0.000433897377163464	8.70854460665972e-07	8.70209600271793e-05	0.012987012987013	0.0688758058821215	Fabales
Arecales - Fabales	metastat	bASV1274|Comamonadaceae	Bacteria	0.000161008108901383	1.06005466252924e-07	4.5590992026703e-05	0.000366141232884916	5.1842255875457e-07	6.71418070209593e-05	0.012987012987013	0.0688758058821215	Fabales
Arecales - Fabales	metastat	bASV2949|Puia	Bacteria	0.000289585174950869	1.80391879093948e-07	5.94734871056741e-05	0.000107067129076389	1.17633957446856e-07	3.19828700681904e-05	0.012987012987013	0.0688758058821215	Arecales
Arecales - Fabales	metastat	bASV2242|Micromonospora	Bacteria	0.000285754335789445	1.4283472744487e-07	5.29214600166281e-05	0.000124569566919081	9.20219112066047e-08	2.82876392127612e-05	0.012987012987013	0.0688758058821215	Arecales
Arecales - Fabales	metastat	bASV2895|Paenibacillus_xylanexedens	Bacteria	0.000242048373728773	1.46664018708109e-07	5.36261603390362e-05	8.5037820407905e-05	9.63220862486955e-08	2.89410324398476e-05	0.012987012987013	0.0688758058821215	Arecales
Arecales - Fabales	metastat	bASV433|Methyloligellaceae	Bacteria	0.000525323082751536	2.24223710809328e-07	6.63064352020413e-05	0.000319576547065013	2.30550476131113e-07	4.4774845046814e-05	0.013986013986014	0.0705557035865634	Arecales
Arecales - Fabales	metastat	bASV439|PLTA13	Bacteria	0.000334577139025326	2.24836703781803e-07	6.63970091137473e-05	0.000570826585805401	5.80682384598833e-07	7.10592150251454e-05	0.013986013986014	0.0705557035865634	Fabales
Arecales - Fabales	metastat	bASV740|Gemmatimonadaceae	Bacteria	0.000419564439985516	2.29273352437752e-07	6.70489070019191e-05	0.000734649069018824	1.036099422124e-06	9.49187030694298e-05	0.013986013986014	0.0705557035865634	Fabales
Arecales - Fabales	metastat	bASV817|uncultured_bacterium	Bacteria	0.000427688605570853	2.32004359490563e-07	6.74470539612388e-05	0.000233308191545061	2.12343383216169e-07	4.29705038588068e-05	0.013986013986014	0.0705557035865634	Arecales
Arecales - Fabales	metastat	bASV2408|R7C24	Bacteria	0.000383208247637273	1.75972653299772e-07	5.87404816319075e-05	0.000206339730715384	1.76997710625439e-07	3.9231499170663e-05	0.013986013986014	0.0705557035865634	Arecales
Arecales - Fabales	metastat	bASV2042|uncultured_bacterium	Bacteria	0.00022743190111048	1.33755333655162e-07	5.12118502017024e-05	0.000430446806762421	4.60734651047162e-07	6.3296036763571e-05	0.013986013986014	0.0705557035865634	Fabales
Arecales - Fabales	metastat	bASV1724|Ferruginibacter	Bacteria	0.000317916375956122	1.9448019921495e-07	6.17522245713368e-05	0.00013066590643249	1.75832855014995e-07	3.91021910889463e-05	0.013986013986014	0.0705557035865634	Arecales
Arecales - Fabales	metastat	bASV2420|Rhizobiaceae	Bacteria	0.000324676233834459	1.40567830547771e-07	5.24998282999566e-05	0.000162031521556864	1.45127588152017e-07	3.55243441517059e-05	0.013986013986014	0.0705557035865634	Arecales
Arecales - Fabales	metastat	bASV1326|Streptomyces	Bacteria	0.00049418706678453	2.48161832966087e-07	6.97561344503313e-05	0.00027021336592709	2.14504749625585e-07	4.31886407796818e-05	0.013986013986014	0.0705557035865634	Arecales
Arecales - Fabales	metastat	bASV1683|Sphingomonas	Bacteria	0.000127783903273183	9.50659828762808e-08	4.31745165569584e-05	0.000310926799433638	3.31287026612907e-07	5.36726816281403e-05	0.013986013986014	0.0705557035865634	Fabales
Arecales - Fabales	metastat	bASV2601|SWB02	Bacteria	0.000123033760358501	7.72952382847469e-08	3.89306165831477e-05	0.000306605452474209	3.63807196990784e-07	5.62453628612895e-05	0.013986013986014	0.0705557035865634	Fabales
Arecales - Fabales	metastat	bASV1750|Rhizobium_soli	Bacteria	0.000169031831218139	1.43721174151573e-07	5.30854239718035e-05	0.000400589187108621	5.54109061683501e-07	6.94142612639006e-05	0.013986013986014	0.0705557035865634	Fabales
Arecales - Fabales	metastat	bASV6555|Microtrichales	Bacteria	0.000240448442169494	1.38775020170739e-07	5.21639609968149e-05	8.74714003379188e-05	8.53399748903343e-08	2.7241269026549e-05	0.013986013986014	0.0705557035865634	Arecales
Arecales - Fabales	metastat	bASV3971|Reyranella	Bacteria	0.000105665786439135	7.41952174739349e-08	3.81419478496239e-05	0.000363112598333519	8.27262633268943e-07	8.48150229345139e-05	0.013986013986014	0.0705557035865634	Fabales
Arecales - Fabales	metastat	bASV38|Bradyrhizobium	Bacteria	0.00107478581961106	9.18162604664984e-07	0.000134175960316162	0.00155529891781281	1.7592115977771e-06	0.000123683030988829	0.014985014985015	0.0730500971477046	Fabales
Arecales - Fabales	metastat	bASV156|uncultured_Alphaproteobacteria	Bacteria	0.000615641156022164	2.80667164420374e-07	7.41840800558504e-05	0.000907897522322573	8.61558730980311e-07	8.65552716592277e-05	0.014985014985015	0.0730500971477046	Fabales
Arecales - Fabales	metastat	bASV116|Xanthobacteraceae	Bacteria	0.00077914148770158	2.99517189551007e-07	7.66347575818413e-05	0.000523459026092576	4.74665866065019e-07	6.42458502171977e-05	0.014985014985015	0.0730500971477046	Arecales
Arecales - Fabales	metastat	bASV1247|uncultured_bacterium	Bacteria	0.000448946041381796	2.14840065387652e-07	6.49041624375407e-05	0.000255997216834853	2.26108882168607e-07	4.43414500526369e-05	0.014985014985015	0.0730500971477046	Arecales
Arecales - Fabales	metastat	bASV3696|Pedosphaeraceae	Bacteria	0.000358825852139147	2.14463640141021e-07	6.48472776184924e-05	0.000170383473810332	1.41769276831097e-07	3.51109145461979e-05	0.014985014985015	0.0730500971477046	Arecales
Arecales - Fabales	metastat	bASV3718|planctomycete_A-2	Bacteria	0.000369458797290408	1.86265143864469e-07	6.04339120265495e-05	0.000197001398927222	1.58705169040762e-07	3.71489562192606e-05	0.014985014985015	0.0730500971477046	Arecales
Arecales - Fabales	metastat	bASV3683|Xanthobacteraceae	Bacteria	0.000439761047365181	2.20947973725047e-07	6.58203100136656e-05	0.000229792439857988	1.90866689230211e-07	4.07395427211975e-05	0.014985014985015	0.0730500971477046	Arecales
Arecales - Fabales	metastat	bASV4783|TRA3-20	Bacteria	0.000215816831845445	1.40117866114739e-07	5.24157337018637e-05	6.56230686188421e-05	5.41237039731785e-08	2.16942597042304e-05	0.014985014985015	0.0730500971477046	Arecales
Arecales - Fabales	metastat	bASV4815|uncultured_bacterium	Bacteria	0.00033468097212991	1.85609649278422e-07	6.03274803701613e-05	0.000149449407424285	1.34595849494398e-07	3.42110901792918e-05	0.014985014985015	0.0730500971477046	Arecales
Arecales - Fabales	metastat	bASV1678|Gaiellales	Bacteria	0.00019392018933542	1.24332047421227e-07	4.93749256482392e-05	5.89688458051222e-05	4.67120427702385e-08	2.01541974849643e-05	0.014985014985015	0.0730500971477046	Arecales
Arecales - Fabales	metastat	bASV143|Terrimonas	Bacteria	0.000731953927375151	3.84681914298577e-07	8.68491947763791e-05	0.00108195403556011	1.53642308037071e-06	0.000115586334395013	0.015984015984016	0.0758762976275174	Fabales
Arecales - Fabales	metastat	bASV756|metagenome	Bacteria	0.000249648111029901	1.90236636725457e-07	6.1074791296178e-05	0.000495037726232961	6.65489766787734e-07	7.60714633570608e-05	0.015984015984016	0.0758762976275174	Fabales
Arecales - Fabales	metastat	bASV550|uncultured_bacterium	Bacteria	0.000351590388641384	2.95475512632527e-07	7.61159477547154e-05	0.000603528667173683	6.4320343638051e-07	7.47868528541649e-05	0.015984015984016	0.0758762976275174	Fabales
Arecales - Fabales	metastat	bASV1492|mle1-7	Bacteria	0.000577910294968497	3.69505351601297e-07	8.51187580535245e-05	0.000314181483670279	3.13929396550298e-07	5.22476874088013e-05	0.015984015984016	0.0758762976275174	Arecales
Arecales - Fabales	metastat	bASV1494|Nocardioides_iriomotensis	Bacteria	0.000440245625914915	2.63426162090276e-07	7.18694571046367e-05	0.000248974567033529	1.92997342341842e-07	4.09663002905348e-05	0.015984015984016	0.0758762976275174	Arecales
Arecales - Fabales	metastat	bASV2519|Lachnospiraceae	Bacteria	0.000245595776110512	1.47012789513996e-07	5.36898846707711e-05	9.48049448405876e-05	1.01349108221014e-07	2.96866399787212e-05	0.015984015984016	0.0758762976275174	Arecales
Arecales - Fabales	metastat	bASV2793|Nocardioides	Bacteria	0.000185238028910908	9.74708447548572e-08	4.37171938075738e-05	6.33452855443352e-05	4.27456096709761e-08	1.92795475481315e-05	0.015984015984016	0.0758762976275174	Arecales
Arecales - Fabales	metastat	bASV3063|CCD24	Bacteria	0.000224954141035814	1.56395294607142e-07	5.53766593797567e-05	8.00490436969818e-05	6.01407358747774e-08	2.28683825543093e-05	0.015984015984016	0.0758762976275174	Arecales
Arecales - Fabales	metastat	bASV16|Bacillus	Bacteria	0.00110036870889761	2.1528092939769e-07	6.49707218220049e-05	0.00141340413879636	1.5775794196138e-06	0.000117124215727087	0.016983016983017	0.0785580277952631	Fabales
Arecales - Fabales	metastat	bASV4|Pseudomonas	Bacteria	0.000877510644187995	8.99157269288138e-07	0.00013278002369304	0.00134444503622066	1.90332825314539e-06	0.000128649447966689	0.016983016983017	0.0785580277952631	Fabales
Arecales - Fabales	metastat	bASV60|uncultured_Caulobacterales	Bacteria	0.000992720667046987	2.53595879923286e-07	7.05157303996061e-05	0.00129465594288798	9.84641900066594e-07	9.25316350165712e-05	0.016983016983017	0.0785580277952631	Fabales
Arecales - Fabales	metastat	bASV67|Enterobacterales	Bacteria	0.000527926732444596	2.78309971608916e-07	7.38719044484538e-05	0.000849446776829315	1.22802391313097e-06	0.000103336676982737	0.016983016983017	0.0785580277952631	Fabales
Arecales - Fabales	metastat	bASV1842|Pseudonocardia	Bacteria	0.000299346090130092	1.30877974493296e-07	5.06580180621606e-05	0.00015924136322659	1.15407974651751e-07	3.16788195118979e-05	0.016983016983017	0.0785580277952631	Arecales
Arecales - Fabales	metastat	bASV1025|uncultured_bacterium	Bacteria	0.000383903017164578	2.86383970196138e-07	7.49357856076131e-05	0.000172950950122392	2.35086594839718e-07	4.52131757287166e-05	0.016983016983017	0.0785580277952631	Arecales
Arecales - Fabales	metastat	bASV2414|Pedosphaeraceae	Bacteria	0.000361448809021848	2.01722781223426e-07	6.28915626411025e-05	0.000186300215946477	1.68615745198624e-07	3.82913028152919e-05	0.016983016983017	0.0785580277952631	Arecales
Arecales - Fabales	metastat	bASV3461|Chitinophagaceae	Bacteria	0.000305051559091815	1.83457729103634e-07	5.99767486162851e-05	0.00012690864551775	1.53748003241104e-07	3.65641786263317e-05	0.016983016983017	0.0785580277952631	Arecales
Arecales - Fabales	metastat	bASV1103|Afipia	Bacteria	0.000371469280339541	1.97682011750776e-07	6.22584763503429e-05	0.000684020995061716	1.45744173025202e-06	0.000112576224621443	0.017982017982018	0.0823894133653225	Fabales
Arecales - Fabales	metastat	bASV2528|uncultured_soil	Bacteria	0.000234457530387731	1.19356046325233e-07	4.8376798507426e-05	9.02862150579206e-05	6.91437382788905e-08	2.45203975921539e-05	0.017982017982018	0.0823894133653225	Arecales
Arecales - Fabales	metastat	bASV2357|Hyphomicrobium	Bacteria	6.17856884703316e-05	4.05841492082374e-08	2.82093536177997e-05	0.000226713408483674	3.54423935788796e-07	5.55152885944823e-05	0.017982017982018	0.0823894133653225	Fabales
Arecales - Fabales	metastat	bASV72|Mycobacterium	Bacteria	0.000905316360825011	2.0200306843668e-07	6.29352403598381e-05	0.00116609854541323	9.61799681308337e-07	9.14520392863807e-05	0.018981018981019	0.0848192794659459	Fabales
Arecales - Fabales	metastat	bASV848|uncultured_bacterium	Bacteria	0.000649245001328849	2.79652376794022e-07	7.40498476510094e-05	0.000399664221083856	5.25261571080887e-07	6.75832221963595e-05	0.018981018981019	0.0848192794659459	Arecales
Arecales - Fabales	metastat	bASV1016|Pedosphaeraceae	Bacteria	0.000698430588083375	2.74706562448321e-07	7.33921193675533e-05	0.00046594313100514	3.86410071425787e-07	5.79662624085385e-05	0.018981018981019	0.0848192794659459	Arecales
Arecales - Fabales	metastat	bASV1796|Myxococcaceae	Bacteria	0.000481636088512478	2.65696316977714e-07	7.21784712046838e-05	0.000277206719891763	2.29261209560868e-07	4.46494763162111e-05	0.018981018981019	0.0848192794659459	Arecales
Arecales - Fabales	metastat	bASV1779|uncultured_Ferrimicrobium	Bacteria	0.00035494896407259	2.15282897771467e-07	6.49710188440708e-05	0.000170464247513747	1.84578373339042e-07	4.00628173420564e-05	0.018981018981019	0.0848192794659459	Arecales
Arecales - Fabales	metastat	bASV1459|uncultured_Chloroflexi	Bacteria	0.000422150571852563	1.66870519382931e-07	5.72011448162777e-05	0.00025183870846853	1.71447650828836e-07	3.86115156092331e-05	0.018981018981019	0.0848192794659459	Arecales
Arecales - Fabales	metastat	bASV1963|Mesorhizobium	Bacteria	0.000330404783097728	1.34559009996841e-07	5.13654744037508e-05	0.000179428341028766	1.45366291156695e-07	3.5553547020099e-05	0.018981018981019	0.0848192794659459	Arecales
Arecales - Fabales	metastat	bASV5306|0319-6G20	Bacteria	0.000360116383628846	1.65303698080999e-07	5.6931968014292e-05	0.000196089276379075	2.27031741119611e-07	4.44318472856352e-05	0.018981018981019	0.0848192794659459	Arecales
Arecales - Fabales	metastat	bASV801|Bacillus	Bacteria	0.000725626704048852	2.00762231612492e-07	6.27416476141883e-05	0.000504843712213068	4.83676000040136e-07	6.48527428966468e-05	0.01998001998002	0.0868703857972703	Arecales
Arecales - Fabales	metastat	bASV1100|Candidatus_Solibacter	Bacteria	0.000466849911076185	2.784582790962e-07	7.3891584478804e-05	0.000246444279435736	2.86526239037975e-07	4.99152533137286e-05	0.01998001998002	0.0868703857972703	Arecales
Arecales - Fabales	metastat	bASV729|Novosphingobium	Bacteria	0.000212540949143731	1.19258508642875e-07	4.83570277235114e-05	0.000470971725500055	1.04711582669765e-06	9.54219839175552e-05	0.01998001998002	0.0868703857972703	Fabales
Arecales - Fabales	metastat	bASV2837|Microscillaceae	Bacteria	0.000439155393344395	2.11830362503661e-07	6.44479365044346e-05	0.000236653921885825	2.65588623870179e-07	4.80569068347443e-05	0.01998001998002	0.0868703857972703	Arecales
Arecales - Fabales	metastat	bASV2778|Acidobacteriales	Bacteria	0.000326028361377058	1.73063866944675e-07	5.82529755100797e-05	0.000164589306983123	1.57407745425777e-07	3.699679720871e-05	0.01998001998002	0.0868703857972703	Arecales
Arecales - Fabales	metastat	bASV1747|A21b	Bacteria	0.000346332749254023	2.17222545181226e-07	6.52630492069497e-05	0.000153476680963237	1.83164099296837e-07	3.99090378013974e-05	0.01998001998002	0.0868703857972703	Arecales
Arecales - Fabales	metastat	bASV7002|uncultured_Alphaproteobacteria	Bacteria	0.00016090964894164	9.10321616545724e-08	4.22486017066611e-05	0.00032005430582324	2.60767459198934e-07	4.76187266048662e-05	0.01998001998002	0.0868703857972703	Fabales
Arecales - Fabales	metastat	bASV7747|uncultured_bacterium	Bacteria	0.00024082016332099	1.06853743451366e-07	4.57730427241063e-05	0.000102012070852071	9.06493463891623e-08	2.80758826396022e-05	0.01998001998002	0.0868703857972703	Arecales
Arecales - Fabales	metastat	bASV6312|uncultured_bacterium	Bacteria	0.000370001391727538	1.72497832835282e-07	5.81576344751971e-05	0.000181765132183555	1.69673708278108e-07	3.84112424980554e-05	0.01998001998002	0.0868703857972703	Arecales
Arecales - Fabales	metastat	bASV53|Lactococcus_lactis	Bacteria	0.00036737858664785	1.72409682930259e-07	5.81427727085694e-05	0.000618777923731891	8.76122177196971e-07	8.72837540138844e-05	0.020979020979021	0.0890739894252656	Fabales
Arecales - Fabales	metastat	bASV772|mle1-7	Bacteria	0.000703158353770903	8.56867920234832e-07	0.000129619951277997	0.000345272339766961	3.92383126744481e-07	5.84125601996903e-05	0.020979020979021	0.0890739894252656	Arecales
Arecales - Fabales	metastat	bASV2718|metagenome	Bacteria	0.000203897737599008	1.03229918065574e-07	4.49901771557021e-05	0.000378869120593849	3.53995346473404e-07	5.54817123394417e-05	0.020979020979021	0.0890739894252656	Fabales
Arecales - Fabales	metastat	bASV2485|Ellin6055	Bacteria	0.000259990573915608	1.54264864579404e-07	5.49981932999879e-05	0.000474289231353051	5.1476036827771e-07	6.69042383968187e-05	0.020979020979021	0.0890739894252656	Fabales
Arecales - Fabales	metastat	bASV2570|uncultured_bacterium	Bacteria	0.000300131207773004	2.02876145741158e-07	6.3071099895146e-05	0.000114161499306808	1.29862681331802e-07	3.36041769313438e-05	0.020979020979021	0.0890739894252656	Arecales
Arecales - Fabales	metastat	bASV1002|Polyangiaceae	Bacteria	0.000417382095257284	2.74677204303831e-07	7.33881975209177e-05	0.000216601881956576	1.93824689910593e-07	4.10540142517034e-05	0.020979020979021	0.0890739894252656	Arecales
Arecales - Fabales	metastat	bASV3625|uncultured_Sphingobacteriales	Bacteria	0.000375688145304153	1.54770779324856e-07	5.50883033250478e-05	0.000213275068523694	1.76217528541289e-07	3.91449400962838e-05	0.020979020979021	0.0890739894252656	Arecales
Arecales - Fabales	metastat	bASV3231|Acidimicrobiia	Bacteria	0.000294919092774431	1.35025588699248e-07	5.14544513402907e-05	0.000148833147542913	1.19189132210678e-07	3.21935899926459e-05	0.020979020979021	0.0890739894252656	Arecales
Arecales - Fabales	metastat	bASV303|Ellin6067	Bacteria	0.000706721649221806	2.52884600763212e-07	7.04167706132025e-05	0.000972421362387867	9.41384566134135e-07	9.04762551667147e-05	0.021978021978022	0.0909160637644003	Fabales
Arecales - Fabales	metastat	bASV42|Roseateles_depolymerans	Bacteria	0.000642040372063705	3.71536726271094e-07	8.53524097401639e-05	0.00102081813947853	1.85339141900338e-06	0.000126950569600016	0.021978021978022	0.0909160637644003	Fabales
Arecales - Fabales	metastat	bASV709|Caulobacteraceae	Bacteria	0.000549836963656164	2.5197450167525e-07	7.02899459626785e-05	0.000773486165081154	6.63927575629703e-07	7.59821246501126e-05	0.021978021978022	0.0909160637644003	Fabales
Arecales - Fabales	metastat	bASV1304|uncultured_Rhodospirillaceae	Bacteria	0.000291881097360339	1.55761908483856e-07	5.52644105036045e-05	0.000516573005761164	6.97684285457702e-07	7.7889793128145e-05	0.021978021978022	0.0909160637644003	Fabales
Arecales - Fabales	metastat	bASV1505|uncultured_proteobacterium	Bacteria	0.000353606120403286	2.46820501319429e-07	6.95673606868191e-05	0.000582935117198028	6.05678984064917e-07	7.25725414635421e-05	0.021978021978022	0.0909160637644003	Fabales
Arecales - Fabales	metastat	bASV147|Xanthobacteraceae	Bacteria	0.000243772715642085	2.07570578697045e-07	6.37966405620303e-05	0.000521179259710234	8.92370936931301e-07	8.80894277292314e-05	0.021978021978022	0.0909160637644003	Fabales
Arecales - Fabales	metastat	bASV2154|Smaragdicoccus	Bacteria	0.000311580229063463	1.5716502022347e-07	5.55127648672384e-05	0.000150620514075118	1.04027755595773e-07	3.00763890634112e-05	0.021978021978022	0.0909160637644003	Arecales
Arecales - Fabales	metastat	bASV1674|uncultured_bacterium	Bacteria	0.000389545317123937	1.85450590702427e-07	6.03016259499231e-05	0.000205710246755153	2.2529207793603e-07	4.42612872301498e-05	0.021978021978022	0.0909160637644003	Arecales
Arecales - Fabales	metastat	bASV2372|uncultured_bacterium	Bacteria	0.000289629001377862	1.3820453800913e-07	5.20566316826186e-05	0.00013565499082591	1.04516509469302e-07	3.01469602576535e-05	0.021978021978022	0.0909160637644003	Arecales
Arecales - Fabales	metastat	bASV66|Allorhizobium-Neorhizobium-Pararhizobium-Rhizobium	Bacteria	0.00104122633271882	8.19776702457602e-07	0.000126783488630676	0.00149643338176965	1.95432035714146e-06	0.000130361382556721	0.022977022977023	0.0939746165001827	Fabales
Arecales - Fabales	metastat	bASV141|Micrococcaceae	Bacteria	0.000584394739810593	2.23260980864974e-07	6.61639349757107e-05	0.000912487261518267	1.72447299195705e-06	0.000122455777002825	0.022977022977023	0.0939746165001827	Fabales
Arecales - Fabales	metastat	bASV1778|uncultured_bacterium	Bacteria	0.000252941917056116	1.86364989219305e-07	6.04501073190803e-05	0.000497309534822422	7.54379359635633e-07	8.09927189231891e-05	0.022977022977023	0.0939746165001827	Fabales
Arecales - Fabales	metastat	bASV4537|uncultured_bacterium	Bacteria	0.000298042659239744	1.28806537760083e-07	5.02555309140457e-05	0.000159654245013687	1.3608649331736e-07	3.44000117944064e-05	0.022977022977023	0.0939746165001827	Arecales
Arecales - Fabales	metastat	bASV245|Allorhizobium-Neorhizobium-Pararhizobium-Rhizobium	Bacteria	0.000411878346108631	2.7982951284231e-07	7.40732960856102e-05	0.000737368024172747	1.58530507038672e-06	0.000117410653186257	0.023976023976024	0.0956292180842678	Fabales
Arecales - Fabales	metastat	bASV2095|mle1-7	Bacteria	0.000380184641685191	2.24565998169242e-07	6.63570257475692e-05	0.000195569852513916	2.23205671088119e-07	4.40558608930426e-05	0.023976023976024	0.0956292180842678	Arecales
Arecales - Fabales	metastat	bASV970|SC-I-84	Bacteria	0.000234326158570753	2.02087912153284e-07	6.29484557510106e-05	0.000472612599399234	7.34998321584053e-07	7.99455424204803e-05	0.023976023976024	0.0956292180842678	Fabales
Arecales - Fabales	metastat	bASV4780|Acidobacteriae	Bacteria	0.000343381757309435	1.76537815513381e-07	5.88347328912099e-05	0.000174117066343032	1.67098577573639e-07	3.81186451665847e-05	0.023976023976024	0.0956292180842678	Arecales
Arecales - Fabales	metastat	bASV1307|Occallatibacter	Bacteria	0.000397663884393012	2.59522667053905e-07	7.13349826253221e-05	0.000201294133742056	2.64221790887965e-07	4.79330865929801e-05	0.023976023976024	0.0956292180842678	Arecales
Arecales - Fabales	metastat	bASV1424|Comamonadaceae	Bacteria	0.000336797772935593	1.71796549895097e-07	5.80392953253625e-05	0.000168757557759014	1.4873381147554e-07	3.5963001697462e-05	0.023976023976024	0.0956292180842678	Arecales
Arecales - Fabales	metastat	bASV5803|KD3-93	Bacteria	0.000309192515156208	1.78622736012663e-07	5.91811337208369e-05	0.000147057873195669	1.36974915540005e-07	3.4512117032819e-05	0.023976023976024	0.0956292180842678	Arecales
Arecales - Fabales	metastat	bASV3868|uncultured_bacterium	Bacteria	0.00021785698437407	1.50128676296033e-07	5.42558709746359e-05	0.000460548769423855	9.63333043420459e-07	9.15249095777831e-05	0.023976023976024	0.0956292180842678	Fabales
Arecales - Fabales	metastat	bASV1454|Novosphingobium	Bacteria	0.000160133193634375	1.11607765883465e-07	4.67802048557127e-05	0.000416378015446787	1.14508248807982e-06	9.97859660813135e-05	0.023976023976024	0.0956292180842678	Fabales
Arecales - Fabales	metastat	bASV22|Sphingobium_yanoikuyae	Bacteria	0.00114805753243653	8.18563617748577e-07	0.000126689648411691	0.0015919869225663	2.27205877500278e-06	0.000140559712670847	0.024975024975025	0.0977291840219291	Fabales
Arecales - Fabales	metastat	bASV109|Pedomicrobium	Bacteria	0.000936137603990647	2.78710967608758e-07	7.39251035407125e-05	0.00119726515459543	8.66474199370779e-07	8.68018332490626e-05	0.024975024975025	0.0977291840219291	Fabales
Arecales - Fabales	metastat	bASV529|Rhodoplanes	Bacteria	0.000649386435635258	1.71094782600873e-07	5.79206324105723e-05	0.000452002518404641	3.90739810552414e-07	5.82901147971461e-05	0.024975024975025	0.0977291840219291	Arecales
Arecales - Fabales	metastat	bASV4294|metagenome	Bacteria	0.000512959024668206	1.567757220651e-07	5.54439696088073e-05	0.000350921373863008	2.12455129186435e-07	4.29818090122903e-05	0.024975024975025	0.0977291840219291	Arecales
Arecales - Fabales	metastat	bASV1744|uncultured_bacterium	Bacteria	0.000427029150607419	2.0774987887527e-07	6.38241884928434e-05	0.000245695521748982	2.2002938353464e-07	4.37412732697362e-05	0.024975024975025	0.0977291840219291	Arecales
Arecales - Fabales	metastat	bASV1864|Reyranella	Bacteria	0.000397921817138066	1.4647758231261e-07	5.35920652439333e-05	0.000244982193363754	1.72571824999701e-07	3.87378957251784e-05	0.024975024975025	0.0977291840219291	Arecales
Arecales - Fabales	metastat	bASV2105|Gammaproteobacteria	Bacteria	0.000460557416780879	1.89412329398871e-07	6.09423271882123e-05	0.000278940785042916	3.21325450655877e-07	5.2859572014247e-05	0.024975024975025	0.0977291840219291	Arecales
Arecales - Fabales	metastat	bASV699|uncultured_Rhodospirillales	Bacteria	0.000643517505203419	2.86084842427852e-07	7.48966402068317e-05	0.000910415007854865	8.83375640236475e-07	8.76443227277394e-05	0.025974025974026	0.0997511671396242	Fabales
Arecales - Fabales	metastat	bASV671|uncultured_bacterium	Bacteria	0.000402773762601501	2.74443975081386e-07	7.33570338369847e-05	0.000192094772454831	2.736867929785e-07	4.87840666235891e-05	0.025974025974026	0.0997511671396242	Arecales
Arecales - Fabales	metastat	bASV2887|uncultured_Bacteroidetes	Bacteria	0.000312078393939181	2.63960830533114e-07	7.19423558098623e-05	0.000132355497844747	9.63943881759071e-08	2.89518923577517e-05	0.025974025974026	0.0997511671396242	Arecales
Arecales - Fabales	metastat	bASV3488|uncultured_bacterium	Bacteria	0.000243129100393116	1.18081033939704e-07	4.81177139001281e-05	0.000111372183303666	9.42342217010163e-08	2.86256530893436e-05	0.025974025974026	0.0997511671396242	Arecales
Arecales - Fabales	metastat	bASV1385|Devosia	Bacteria	8.76517874669973e-05	6.32773533782266e-08	3.52240318416406e-05	0.000243318405426771	3.71801086696192e-07	5.68599413277307e-05	0.025974025974026	0.0997511671396242	Fabales
Arecales - Fabales	metastat	bASV3437|uncultured_bacterium	Bacteria	0.000171887650675645	9.3112429171998e-08	4.27286075754089e-05	4.99396970944501e-05	5.95189626854937e-08	2.27498614779335e-05	0.025974025974026	0.0997511671396242	Arecales
Arecales - Fabales	metastat	bASV3599|Chitinophagaceae	Bacteria	0.000233770266458388	1.32951225817887e-07	5.10576809181819e-05	8.99920589957618e-05	1.1551933154381e-07	3.16940992373646e-05	0.025974025974026	0.0997511671396242	Arecales
Arecales - Fabales	metastat	bASV256|Aquabacterium	Bacteria	0.00102606860516441	7.69983697474337e-07	0.000122872777938485	0.0014715084890022	1.91106432046656e-06	0.000128910630332617	0.026973026973027	0.100911064431945	Fabales
Arecales - Fabales	metastat	bASV569|Microscillaceae	Bacteria	0.000504089186120418	3.28500154936071e-07	8.02569592530792e-05	0.000783202737316267	9.44034774609759e-07	9.06035211240979e-05	0.026973026973027	0.100911064431945	Fabales
Arecales - Fabales	metastat	bASV1246|Allorhizobium-Neorhizobium-Pararhizobium-Rhizobium	Bacteria	0.000346281981237394	1.9452217536077e-07	6.1758888438763e-05	0.000650757220357534	1.42716981819054e-06	0.000111400953012493	0.026973026973027	0.100911064431945	Fabales
Arecales - Fabales	metastat	bASV3883|beta_proteobacterium	Bacteria	0.000295340164858503	1.8942791463533e-07	6.09448343667195e-05	0.000513770701854423	6.84285812389538e-07	7.71382616610132e-05	0.026973026973027	0.100911064431945	Fabales
Arecales - Fabales	metastat	bASV2944|uncultured_bacterium	Bacteria	0.000345920452860637	1.52779299076971e-07	5.47327372869383e-05	0.000188273444874442	1.55740784679797e-07	3.68003762598672e-05	0.026973026973027	0.100911064431945	Arecales
Arecales - Fabales	metastat	bASV4670|Bacteria	Bacteria	0.000343415128275525	2.08887658284029e-07	6.39987221508504e-05	0.000178098707801477	1.41743933391522e-07	3.51077760978244e-05	0.026973026973027	0.100911064431945	Arecales
Arecales - Fabales	metastat	bASV8287|metagenome	Bacteria	0.000157741455441412	8.04128301830901e-08	3.97079609203589e-05	0.000378653619528757	7.53131058346276e-07	8.09256802550972e-05	0.026973026973027	0.100911064431945	Fabales
Arecales - Fabales	metastat	bASV3535|Frankiales	Bacteria	0.000204361185043762	8.77445848885619e-08	4.14786940083517e-05	9.91304869655347e-05	6.50798938938641e-08	2.37889075162398e-05	0.026973026973027	0.100911064431945	Arecales
Arecales - Fabales	metastat	bASV4731|OM60(NOR5)_clade	Bacteria	0.000303943299942077	2.27069793682449e-07	6.67259237158564e-05	0.000127072942829517	1.08843496707426e-07	3.07646743646057e-05	0.026973026973027	0.100911064431945	Arecales
Arecales - Fabales	metastat	bASV4472|Roseomonas	Bacteria	0.00032157834018194	1.82875893210748e-07	5.98815650067843e-05	0.000164012183272535	1.2955152322857e-07	3.35638940618675e-05	0.026973026973027	0.100911064431945	Arecales
Arecales - Fabales	metastat	bASV383|metagenome	Bacteria	0.00070644190273926	3.11129686173147e-07	7.81062230672205e-05	0.000989634636438613	9.62810539019308e-07	9.15000850091935e-05	0.027972027972028	0.103050824067907	Fabales
Arecales - Fabales	metastat	bASV2080|uncultured_Bradyrhizobiaceae	Bacteria	0.000379619258814442	1.76817422194723e-07	5.88813066968449e-05	0.00060505200033008	9.3404115377486e-07	9.01226774421766e-05	0.027972027972028	0.103050824067907	Fabales
Arecales - Fabales	metastat	bASV726|Duganella_sp.	Bacteria	0.00041914238421221	2.84441743303905e-07	7.46812498850299e-05	0.000740506525085632	1.67002432376767e-06	0.000120507056396951	0.027972027972028	0.103050824067907	Fabales
Arecales - Fabales	metastat	bASV1530|TK10	Bacteria	0.000411376643644366	2.28200124840557e-07	6.68917951005624e-05	0.000237638634601285	1.78881546745593e-07	3.94397224994199e-05	0.027972027972028	0.103050824067907	Arecales
Arecales - Fabales	metastat	bASV3572|Bauldia	Bacteria	0.0004243234195883	2.69832806288441e-07	7.27381560048715e-05	0.000225024224393162	2.04358212144908e-07	4.21548091170492e-05	0.027972027972028	0.103050824067907	Arecales
Arecales - Fabales	metastat	bASV2642|uncultured_bacterium	Bacteria	0.00041385283229572	1.6314409320963e-07	5.65588524319944e-05	0.000258955729556813	1.65364201380366e-07	3.79203056055799e-05	0.027972027972028	0.103050824067907	Arecales
Arecales - Fabales	metastat	bASV430|Reyranella	Bacteria	0.000896804040220941	8.12144403624666e-07	0.000126191917613894	0.000571221222626727	4.59934554854337e-07	6.32410540058975e-05	0.028971028971029	0.105126230030606	Arecales
Arecales - Fabales	metastat	bASV1097|Planococcaceae	Bacteria	0.00045073482587968	1.92742101017485e-07	6.14756608967792e-05	0.000288776599652145	2.23162832264019e-07	4.40516329721523e-05	0.028971028971029	0.105126230030606	Arecales
Arecales - Fabales	metastat	bASV723|Gaiellales	Bacteria	0.000656564388156885	2.14337201144983e-07	6.48281591480823e-05	0.000437709616584387	5.06877680331995e-07	6.63899992686166e-05	0.028971028971029	0.105126230030606	Arecales
Arecales - Fabales	metastat	bASV1440|uncultured_bacterium	Bacteria	0.000254498005312584	2.11937803953844e-07	6.4464278595058e-05	0.0004472614275662	4.49227949280146e-07	6.25006399466469e-05	0.028971028971029	0.105126230030606	Fabales
Arecales - Fabales	metastat	bASV2342|Candidatus_Solibacter	Bacteria	0.000392783437530563	2.00976606300138e-07	6.27751365636981e-05	0.000222973960665509	2.00612253840257e-07	4.17666659097853e-05	0.028971028971029	0.105126230030606	Arecales
Arecales - Fabales	metastat	bASV1151|Agromyces	Bacteria	0.000227760220210257	1.89654766741437e-07	6.09813161263249e-05	0.000414473050634008	4.14489323254584e-07	6.00354477356709e-05	0.028971028971029	0.105126230030606	Fabales
Arecales - Fabales	metastat	bASV12|Allorhizobium-Neorhizobium-Pararhizobium-Rhizobium	Bacteria	0.00124256811983558	9.09257655191933e-07	0.000133523711281374	0.00165982764845264	1.98540504971731e-06	0.000131394032348019	0.02997002997003	0.10687625050674	Fabales
Arecales - Fabales	metastat	bASV384|TRA3-20	Bacteria	0.000737247333337297	2.61215056632655e-07	7.15671981814453e-05	0.000975140117103366	6.45768072945025e-07	7.49358028404851e-05	0.02997002997003	0.10687625050674	Fabales
Arecales - Fabales	metastat	bASV1802|Xanthobacteraceae	Bacteria	0.000345795565562681	2.0878587603707e-07	6.39831282965221e-05	0.000596672811835956	9.33323596127222e-07	9.00880533568576e-05	0.02997002997003	0.10687625050674	Fabales
Arecales - Fabales	metastat	bASV1976|Alphaproteobacteria	Bacteria	0.000262226966132323	2.41322922890556e-07	6.87882404009717e-05	0.000481394293585631	4.78339509619474e-07	6.44939841899311e-05	0.02997002997003	0.10687625050674	Fabales
Arecales - Fabales	metastat	bASV981|uncultured_bacterium	Bacteria	0.000422271943866584	3.09524884072261e-07	7.79045273008309e-05	0.000210079166919591	2.51802135294105e-07	4.67929886325519e-05	0.02997002997003	0.10687625050674	Arecales
Arecales - Fabales	metastat	bASV1592|Hyphomicrobium	Bacteria	0.000414102355741268	2.39401081102584e-07	6.8513785803652e-05	0.000220306944187509	2.6705128571185e-07	4.81890557403496e-05	0.02997002997003	0.10687625050674	Arecales
Arecales - Fabales	metastat	bASV1202|Subgroup_10	Bacteria	0.000174106189866658	1.3451262662889e-07	5.13566206337548e-05	0.00034844447032315	3.76911679656931e-07	5.72493918446477e-05	0.02997002997003	0.10687625050674	Fabales
Arecales - Fabales	metastat	bASV104|Pantoea_rwandensis	Bacteria	0.000454897657752947	2.56082156698178e-07	7.0860558555432e-05	0.000783029348259937	1.73907643621762e-06	0.000122973183227876	0.030969030969031	0.107784013531878	Fabales
Arecales - Fabales	metastat	bASV590|Nocardioides	Bacteria	0.000478908081839253	2.5350387114461e-07	7.05029371025803e-05	0.000293532331404801	2.27386752048087e-07	4.44665728920723e-05	0.030969030969031	0.107784013531878	Arecales
Arecales - Fabales	metastat	bASV952|SWB02	Bacteria	0.000363618238998409	3.27255516638825e-07	8.0104774115251e-05	0.000606219018418121	5.79289666268246e-07	7.09739490645042e-05	0.030969030969031	0.107784013531878	Fabales
Arecales - Fabales	metastat	bASV2717|Rhizobiales	Bacteria	0.000491719961332185	2.30565864666791e-07	6.72376331171167e-05	0.000758759958830905	1.11987755753476e-06	9.86816381992797e-05	0.030969030969031	0.107784013531878	Fabales
Arecales - Fabales	metastat	bASV866|Paenibacillus	Bacteria	0.000497677044657893	2.97441057328186e-07	7.63686951222182e-05	0.000282826029983284	4.214261340316e-07	6.05357338977207e-05	0.030969030969031	0.107784013531878	Arecales
Arecales - Fabales	metastat	bASV446|Sphingobium	Bacteria	0.000361126129831322	2.61637557201788e-07	7.1625052742928e-05	0.000614552239651533	8.53309731743112e-07	8.61399130708474e-05	0.030969030969031	0.107784013531878	Fabales
Arecales - Fabales	metastat	bASV683|67-14	Bacteria	0.000337117437142368	2.24001312410844e-07	6.62735437130916e-05	0.000589821319094353	7.91960192683111e-07	8.29856033969597e-05	0.030969030969031	0.107784013531878	Fabales
Arecales - Fabales	metastat	bASV1456|Comamonas	Bacteria	0.000212267995422264	1.17952547736864e-07	4.80915278782448e-05	9.62176459256103e-05	6.4438111317446e-08	2.3671320258076e-05	0.030969030969031	0.107784013531878	Arecales
Arecales - Fabales	metastat	bASV2681|SC-I-84	Bacteria	0.000302203642777631	1.82534061156223e-07	5.98255734477933e-05	0.000138876261059361	1.55547266967923e-07	3.67775057631136e-05	0.030969030969031	0.107784013531878	Arecales
Arecales - Fabales	metastat	bASV4352|0319-6G20	Bacteria	0.000198014196887352	1.04675275830964e-07	4.5304043846465e-05	7.6780534323824e-05	9.99242107868947e-08	2.94772146030728e-05	0.030969030969031	0.107784013531878	Arecales
Arecales - Fabales	metastat	bASV171|Gemmatimonadaceae	Bacteria	0.000791461922761972	3.49302853217499e-07	8.27591418109462e-05	0.00107180626378351	9.57735015469481e-07	9.12585917560634e-05	0.031968031968032	0.109939528628944	Fabales
Arecales - Fabales	metastat	bASV293|Microvirga	Bacteria	0.000641730700939612	1.82524069994779e-07	5.9823936122851e-05	0.000870984032318009	7.80706191246533e-07	8.2393868030942e-05	0.031968031968032	0.109939528628944	Fabales
Arecales - Fabales	metastat	bASV1154|Tumebacillus	Bacteria	0.000594055433307008	2.90654590512451e-07	7.54924474228462e-05	0.000379572806162269	3.92731384657725e-07	5.84384763555898e-05	0.031968031968032	0.109939528628944	Arecales
Arecales - Fabales	metastat	bASV1061|Rhodoplanes	Bacteria	0.00031543620536651	2.01315466642192e-07	6.28280358679417e-05	0.00014641096189647	1.75312677891621e-07	3.90443090427119e-05	0.031968031968032	0.109939528628944	Arecales
Arecales - Fabales	metastat	bASV3087|uncultured_Acidobacteria	Bacteria	0.000247418748221081	1.22700843399002e-07	4.9049963202601e-05	0.000116665751885876	1.30178158312285e-07	3.36449696882643e-05	0.031968031968032	0.109939528628944	Arecales
Arecales - Fabales	metastat	bASV37|Allorhizobium-Neorhizobium-Pararhizobium-Rhizobium	Bacteria	0.00119496510669298	7.43558077341328e-07	0.000120745890795288	0.00158342753969034	1.86098185415751e-06	0.000127210262580177	0.032967032967033	0.11100217087514	Fabales
Arecales - Fabales	metastat	bASV630|Kribbella	Bacteria	0.000497438383323473	2.18016700355654e-07	6.53822396517247e-05	0.000739991725800882	9.10362199113508e-07	8.89729904845826e-05	0.032967032967033	0.11100217087514	Fabales
Arecales - Fabales	metastat	bASV903|A21b	Bacteria	0.000789337605817309	9.20169870940762e-07	0.000134322546465716	0.000436475863405553	4.60930715659696e-07	6.3309503075364e-05	0.032967032967033	0.11100217087514	Arecales
Arecales - Fabales	metastat	bASV738|uncultured_bacterium	Bacteria	0.000370965224270063	2.76887527506603e-07	7.36828827205602e-05	0.000660888637476971	1.27837589349337e-06	0.000105433922991292	0.032967032967033	0.11100217087514	Fabales
Arecales - Fabales	metastat	bASV4060|uncultured_bacterium	Bacteria	0.000452624699265705	1.71247177965918e-07	5.79464218330459e-05	0.000290368274078506	2.72419388828519e-07	4.86709795533516e-05	0.032967032967033	0.11100217087514	Arecales
Arecales - Fabales	metastat	bASV3634|Gemmatimonadaceae	Bacteria	0.00028063494450869	1.52261834645669e-07	5.46399686083633e-05	0.00012759786034859	1.22839974742275e-07	3.26829266347292e-05	0.032967032967033	0.11100217087514	Arecales
Arecales - Fabales	metastat	bASV1610|Streptomyces	Bacteria	0.000255539557566196	1.33230884808347e-07	5.11113518737252e-05	0.000123287684046368	9.94691989320563e-08	2.94100247523004e-05	0.032967032967033	0.11100217087514	Arecales
Arecales - Fabales	metastat	bASV2910|metagenome	Bacteria	0.000131347953483019	8.79886048339206e-08	4.15363306209085e-05	0.000286237660440222	2.86549085093395e-07	4.99172432604724e-05	0.032967032967033	0.11100217087514	Fabales
Arecales - Fabales	metastat	bASV4025|Actinobacteria	Bacteria	0.00020115793590904	1.10624869569581e-07	4.65737596678605e-05	8.19104488581617e-05	8.89407762063539e-08	2.78100351306555e-05	0.032967032967033	0.11100217087514	Arecales
Arecales - Fabales	metastat	bASV916|Gaiellales	Bacteria	0.000447637117697007	2.84811813303138e-07	7.47298157289649e-05	0.00025743271738268	2.12373376923124e-07	4.29735385641306e-05	0.033966033966034	0.113051322758241	Arecales
Arecales - Fabales	metastat	bASV1573|uncultured_bacterium	Bacteria	0.000218596135593918	1.33894547070739e-07	5.12384940830314e-05	0.000392549874283986	3.94992501105714e-07	5.86064621088771e-05	0.033966033966034	0.113051322758241	Fabales
Arecales - Fabales	metastat	bASV2653|Afipia	Bacteria	0.000221999257486807	1.49002526630258e-07	5.40519950531037e-05	0.00045830857618762	8.44244271298594e-07	8.56811212171693e-05	0.033966033966034	0.113051322758241	Fabales
Arecales - Fabales	metastat	bASV2952|uncultured_bacterium	Bacteria	0.000336887338514116	2.24672065989994e-07	6.63726948922129e-05	0.000165268500017152	1.87399794534145e-07	4.03678514505255e-05	0.033966033966034	0.113051322758241	Arecales
Arecales - Fabales	metastat	bASV1225|Mycobacterium	Bacteria	0.000292299014947624	2.1929163057865e-07	6.55731339322669e-05	0.000132989307634432	1.15716047458434e-07	3.1721073431373e-05	0.033966033966034	0.113051322758241	Arecales
Arecales - Fabales	metastat	bASV220|metagenome	Bacteria	0.000643660969828441	2.30391511445255e-07	6.72122058600491e-05	0.000456481908150656	3.4475266008674e-07	5.47526183679426e-05	0.034965034965035	0.115315984791251	Arecales
Arecales - Fabales	metastat	bASV2777|Phaselicystis	Bacteria	0.000385577396959685	2.19738110496184e-07	6.56398537619178e-05	0.000213689138566117	1.97262877512073e-07	4.14165349790419e-05	0.034965034965035	0.115315984791251	Arecales
Arecales - Fabales	metastat	bASV895|Gaiella	Bacteria	0.000500042464868479	2.49559548145508e-07	6.99523014163318e-05	0.0003242812213813	3.25039341581307e-07	5.31641708035474e-05	0.034965034965035	0.115315984791251	Arecales
Arecales - Fabales	metastat	bASV2632|metagenome	Bacteria	0.000217135226188376	9.9157396652379e-08	4.40937941150272e-05	9.83641300805765e-05	1.10094769669954e-07	3.09410055301536e-05	0.034965034965035	0.115315984791251	Arecales
Arecales - Fabales	metastat	bASV229|Rhodoplanes	Bacteria	0.00082565061936243	2.11816465982352e-07	6.44458225090629e-05	0.0010535395333391	8.63629632058885e-07	8.66592342884967e-05	0.035964035964036	0.11622792242608	Fabales
Arecales - Fabales	metastat	bASV2585|Rhodospirillaceae_bacterium	Bacteria	0.00056068783528355	1.87114862520068e-07	6.05716012083427e-05	0.000756589722688953	5.58490807131059e-07	6.96881754757552e-05	0.035964035964036	0.11622792242608	Fabales
Arecales - Fabales	metastat	bASV953|metagenome	Bacteria	0.000375608772673171	2.27998119226597e-07	6.6862181817409e-05	0.000572500307629949	4.25299157845425e-07	6.08132678490637e-05	0.035964035964036	0.11622792242608	Fabales
Arecales - Fabales	metastat	bASV339|MND1	Bacteria	0.000374626128439841	3.54958709850211e-07	8.34264628457021e-05	0.000639328881149474	7.65151374650154e-07	8.15689292215434e-05	0.035964035964036	0.11622792242608	Fabales
Arecales - Fabales	metastat	bASV840|Mycobacterium	Bacteria	0.000336141642147946	1.50770900725572e-07	5.43717957316994e-05	0.00052888830623388	5.54543250547718e-07	6.94414517572471e-05	0.035964035964036	0.11622792242608	Fabales
Arecales - Fabales	metastat	bASV1881|Adhaeribacter	Bacteria	0.000506477238160857	3.70529367909424e-07	8.52366219632982e-05	0.000299033004087355	3.36815514459276e-07	5.41186710897029e-05	0.035964035964036	0.11622792242608	Arecales
Arecales - Fabales	metastat	bASV4407|uncultured_bacterium	Bacteria	0.000362321064820012	2.07191139102841e-07	6.37383036717928e-05	0.000198443548285038	1.6742314672376e-07	3.81556476785786e-05	0.035964035964036	0.11622792242608	Arecales
Arecales - Fabales	metastat	bASV8617|Pedosphaeraceae	Bacteria	0.000227123273697989	1.01352973552837e-07	4.45792912339168e-05	0.000107232199157666	8.96004100587489e-08	2.79129719039528e-05	0.035964035964036	0.11622792242608	Arecales
Arecales - Fabales	metastat	bASV4414|uncultured_bacterium	Bacteria	0.000348523572816427	1.76142474955801e-07	5.87688184221973e-05	0.000186079103698966	2.14909076877187e-07	4.32293254809829e-05	0.035964035964036	0.11622792242608	Arecales
Arecales - Fabales	metastat	bASV1758|metagenome	Bacteria	0.000498122092415706	2.59255862690841e-07	7.12983049451788e-05	0.000324005716384825	2.6765841261419e-07	4.82438022704958e-05	0.036963036963037	0.118137971678606	Arecales
Arecales - Fabales	metastat	bASV1021|Pseudomonas_oryzae	Bacteria	0.000472784374433024	2.19491457316648e-07	6.56030034756969e-05	0.000292577064020686	2.56144784718946e-07	4.71947661725089e-05	0.036963036963037	0.118137971678606	Arecales
Arecales - Fabales	metastat	bASV2669|uncultured_bacterium	Bacteria	0.000296475967720537	2.52927854625187e-07	7.04227924647488e-05	0.000123567838632566	1.4211365097669e-07	3.51535329384996e-05	0.036963036963037	0.118137971678606	Arecales
Arecales - Fabales	metastat	bASV2716|uncultured_bacterium	Bacteria	0.000209709868270486	1.36866077858529e-07	5.18039437249844e-05	0.000391017571746856	4.88818584004071e-07	6.51965979376539e-05	0.036963036963037	0.118137971678606	Fabales
Arecales - Fabales	metastat	bASV3483|uncultured_bacterium	Bacteria	0.00019256483920858	8.38356381168476e-08	4.05442479460011e-05	9.50264340785748e-05	6.2120061576625e-08	2.32416533080672e-05	0.036963036963037	0.118137971678606	Arecales
Arecales - Fabales	metastat	bASV362|Microbacterium	Bacteria	0.000646229412409675	1.94450059414111e-07	6.1747439323601e-05	0.00086080237389048	8.05629664400609e-07	8.36987176879908e-05	0.037962037962038	0.119744865128394	Fabales
Arecales - Fabales	metastat	bASV200|uncultured_bacterium	Bacteria	0.000477984404634276	3.43372427112619e-07	8.20535964384422e-05	0.000726259827649816	9.43187107611458e-07	9.05628346658182e-05	0.037962037962038	0.119744865128394	Fabales
Arecales - Fabales	metastat	bASV351|Bradyrhizobium	Bacteria	0.000382566963214931	2.72432052530316e-07	7.30876525247242e-05	0.000636315573119027	7.52734248315654e-07	8.09043583668075e-05	0.037962037962038	0.119744865128394	Fabales
Arecales - Fabales	metastat	bASV1453|metagenome	Bacteria	0.000512412455901048	2.06827797876313e-07	6.36823917357272e-05	0.000343470576405415	2.51614864618427e-07	4.67755849189303e-05	0.037962037962038	0.119744865128394	Arecales
Arecales - Fabales	metastat	bASV2939|uncultured_bacterium	Bacteria	0.000333479851816777	1.75157419296208e-07	5.86042592469731e-05	0.00017971236356902	1.91577649546698e-07	4.08153476618036e-05	0.037962037962038	0.119744865128394	Arecales
Arecales - Fabales	metastat	bASV1730|Ellin6067	Bacteria	0.000374443983192968	1.71081375551333e-07	5.79183630251783e-05	0.000204046521217915	3.8006432298273e-07	5.748832191299e-05	0.037962037962038	0.119744865128394	Arecales
Arecales - Fabales	metastat	bASV193|uncultured_bacterium	Bacteria	0.000920647348174419	2.33994397257986e-07	6.77357028193485e-05	0.0011582838764188	7.98487254344748e-07	8.3326870990604e-05	0.038961038961039	0.121049967848621	Fabales
Arecales - Fabales	metastat	bASV393|uncultured_bacterium	Bacteria	0.000531811792703187	3.5400876138263e-07	8.33147541699819e-05	0.000777519078996774	7.09338700389138e-07	7.85376509203036e-05	0.038961038961039	0.121049967848621	Fabales
Arecales - Fabales	metastat	bASV3751|Acidimicrobiia	Bacteria	0.000370995761738815	1.24677172775534e-07	4.94434065025772e-05	0.000229986029261907	2.29526711411857e-07	4.46753225736493e-05	0.038961038961039	0.121049967848621	Arecales
Arecales - Fabales	metastat	bASV1746|SC-I-84	Bacteria	0.000378550412960535	2.25685203526504e-07	6.65221772730504e-05	0.000210166085961673	2.41709973785114e-07	4.58456743761174e-05	0.038961038961039	0.121049967848621	Arecales
Arecales - Fabales	metastat	bASV1795|Xanthobacteraceae	Bacteria	0.000208767085394879	1.33698215607958e-07	5.12009144388236e-05	0.000389063185674334	4.14030508944637e-07	6.00022107523611e-05	0.038961038961039	0.121049967848621	Fabales
Arecales - Fabales	metastat	bASV387|Pantoea	Bacteria	0.000157629173097667	1.19147563480093e-07	4.83345294267336e-05	0.000341524747379293	5.29735025215174e-07	6.78704024123197e-05	0.038961038961039	0.121049967848621	Fabales
Arecales - Fabales	metastat	bASV466|Chryseobacterium	Bacteria	9.57930975243731e-05	6.18072736456899e-08	3.48124593556111e-05	0.000251549615135975	4.3662631185023e-07	6.16177777741789e-05	0.038961038961039	0.121049967848621	Fabales
Arecales - Fabales	metastat	bASV288|Steroidobacter	Bacteria	0.000479870726705015	2.25412311378833e-07	6.64819467428731e-05	0.000688939324878707	7.06742734824469e-07	7.83938071436363e-05	0.03996003996004	0.123097184980813	Fabales
Arecales - Fabales	metastat	bASV1000|Acidobacteriales	Bacteria	0.000591421041067705	9.67986286122399e-07	0.000137768368130358	0.000265749955144512	5.19714382608359e-07	6.72254081500607e-05	0.03996003996004	0.123097184980813	Arecales
Arecales - Fabales	metastat	bASV4195|uncultured_bacterium	Bacteria	0.000320620417858135	1.36396104119163e-07	5.17149244812484e-05	0.000184082701677814	1.75987091100516e-07	3.91193370509885e-05	0.03996003996004	0.123097184980813	Arecales
Arecales - Fabales	metastat	bASV6924|0319-6G20	Bacteria	0.000180401537390965	8.49651830849802e-08	4.08164670452801e-05	8.261333479927e-05	5.47111630024816e-08	2.18116767695618e-05	0.03996003996004	0.123097184980813	Arecales
Arecales - Fabales	metastat	bASV498|Agromyces	Bacteria	0.000432317556408997	2.04253605190676e-07	6.32848532493959e-05	0.000640559680810084	6.71459387671082e-07	7.64118922949587e-05	0.040959040959041	0.125374352779084	Fabales
Arecales - Fabales	metastat	bASV1891|Myxococcaceae	Bacteria	0.00037056527963804	1.48270060780499e-07	5.39189771206323e-05	0.000236771653105697	1.5842669399539e-07	3.71163498481043e-05	0.040959040959041	0.125374352779084	Arecales
Arecales - Fabales	metastat	bASV1581|MB-A2-108	Bacteria	0.000252269693211858	1.15178197901165e-07	4.75225844970341e-05	0.00013576993418713	9.19014063735828e-08	2.82691114844119e-05	0.040959040959041	0.125374352779084	Arecales
Arecales - Fabales	metastat	bASV1414|Microtrichales	Bacteria	0.000481957998388884	1.79418048877799e-07	5.93127385844578e-05	0.000651501634737593	4.22124259984327e-07	6.05858542812936e-05	0.041958041958042	0.128161309679391	Fabales
Arecales - Fabales	metastat	bASV540|uncultured_bacterium	Bacteria	0.000690074111920303	2.45781626907229e-07	6.9420800819468e-05	0.000908765156384532	7.2458486248001e-07	7.93771877469137e-05	0.042957042957043	0.129572609815741	Fabales
Arecales - Fabales	metastat	bASV3167|Mesorhizobium	Bacteria	0.000365413067608542	1.46091245528983e-07	5.35213436495991e-05	0.000224647465328959	1.92662332872416e-07	4.09307296987628e-05	0.042957042957043	0.129572609815741	Arecales
Arecales - Fabales	metastat	bASV2135|uncultured_bacterium	Bacteria	0.000305990631477741	1.2511758931765e-07	4.95306578297923e-05	0.000184811519893753	1.27514136331603e-07	3.32989275622586e-05	0.042957042957043	0.129572609815741	Arecales
Arecales - Fabales	metastat	bASV2660|Chlorobi_bacterium	Bacteria	0.000156867712451067	1.24759838578549e-07	4.94597952348918e-05	0.000300433539307453	2.85540998156543e-07	4.98293608363708e-05	0.042957042957043	0.129572609815741	Fabales
Arecales - Fabales	metastat	bASV4823|metagenome	Bacteria	0.00023702635545495	1.4134464126535e-07	5.26446916053514e-05	0.000106955409131015	1.06765590674441e-07	3.04695986295736e-05	0.042957042957043	0.129572609815741	Arecales
Arecales - Fabales	metastat	bASV3534|Mesorhizobium	Bacteria	0.000269376124592991	1.22605049486792e-07	4.90308125383661e-05	0.000143129448032651	9.12129943811466e-08	2.8163033801058e-05	0.042957042957043	0.129572609815741	Arecales
Arecales - Fabales	metastat	bASV3117|Gemmatimonas	Bacteria	0.000367678115356298	2.19764946715517e-07	6.5643861878054e-05	0.000209605264389207	2.17352598611103e-07	4.34743901235921e-05	0.043956043956044	0.131490174865868	Arecales
Arecales - Fabales	metastat	bASV1172|uncultured_bacterium	Bacteria	0.000411179050379213	1.93039031327152e-07	6.15229960716352e-05	0.000253819458450353	1.89370354119209e-07	4.05795358705762e-05	0.043956043956044	0.131490174865868	Arecales
Arecales - Fabales	metastat	bASV1517|uncultured_soil	Bacteria	0.000454994156849965	2.26524490296179e-07	6.6645755097186e-05	0.000280708868788059	2.40042299607707e-07	4.56872448766048e-05	0.043956043956044	0.131490174865868	Arecales
Arecales - Fabales	metastat	bASV1649|uncultured_bacterium	Bacteria	0.000279812668486184	2.01632322886007e-07	6.28774598608211e-05	0.00046702621691096	4.38013193710561e-07	6.1715560275281e-05	0.043956043956044	0.131490174865868	Fabales
Arecales - Fabales	metastat	bASV129|Sphingomonas	Bacteria	0.000739644778297045	3.47361681962672e-07	8.25288638708731e-05	0.000988376117908674	8.94629854062693e-07	8.82008505363058e-05	0.044955044955045	0.132831911344091	Fabales
Arecales - Fabales	metastat	bASV189|Comamonadaceae	Bacteria	0.000647917331645546	4.16998152137849e-07	9.04236382570626e-05	0.000908167567595268	7.96043129678587e-07	8.31992438133794e-05	0.044955044955045	0.132831911344091	Fabales
Arecales - Fabales	metastat	bASV98|Methylophilaceae	Bacteria	0.000408481595715436	3.3575993888062e-07	8.11389438762021e-05	0.000688481367617848	1.27893658146754e-06	0.000105457041798711	0.044955044955045	0.132831911344091	Fabales
Arecales - Fabales	metastat	bASV1536|Hyphomicrobium	Bacteria	0.000321447207361853	1.92140037642804e-07	6.13795708561599e-05	0.000495887835858838	4.36088672784062e-07	6.15798296158213e-05	0.044955044955045	0.132831911344091	Fabales
Arecales - Fabales	metastat	bASV2061|Inquilinus_sp.	Bacteria	0.000383701557523786	2.07321411318932e-07	6.37583383733917e-05	0.00063196042992781	1.12458357567431e-06	9.88887638438223e-05	0.044955044955045	0.132831911344091	Fabales
Arecales - Fabales	metastat	bASV1662|Candidatus_Solibacter	Bacteria	0.000319621284647043	1.96820210141759e-07	6.21226191229986e-05	0.000166907135684136	1.451775393798e-07	3.55304571587716e-05	0.044955044955045	0.132831911344091	Arecales
Arecales - Fabales	metastat	bASV1857|Pseudonocardia	Bacteria	0.00045992862041188	1.95583183022003e-07	6.1927089169284e-05	0.000305860157947449	2.41319343021885e-07	4.58086134886827e-05	0.045954045954046	0.134684268182448	Arecales
Arecales - Fabales	metastat	bASV1044|Gemmatimonadaceae	Bacteria	0.00057680417104736	3.42533598061041e-07	8.19533102444337e-05	0.000363873790841176	3.01379178683624e-07	5.11926607072965e-05	0.045954045954046	0.134684268182448	Arecales
Arecales - Fabales	metastat	bASV4501|uncultured_organism	Bacteria	0.000275101929715818	1.09322642848944e-07	4.62988253882562e-05	0.000160705993984293	1.11427300632798e-07	3.11276894256682e-05	0.045954045954046	0.134684268182448	Arecales
Arecales - Fabales	metastat	bASV2140|uncultured_bacterium	Bacteria	0.000295683786274712	1.75893491085055e-07	5.87272677898428e-05	0.000155092492561937	1.5963820881842e-07	3.72579969610751e-05	0.045954045954046	0.134684268182448	Arecales
Arecales - Fabales	metastat	bASV873|Microtrichales	Bacteria	0.00028688732453663	1.94883036491747e-07	6.18161468359368e-05	0.000458459693041936	3.72540886162392e-07	5.69164823810247e-05	0.046953046953047	0.136506868284446	Fabales
Arecales - Fabales	metastat	bASV2271|mle1-7	Bacteria	0.000383377302024645	1.92945899473742e-07	6.15081533689451e-05	0.000227829107854451	1.90782752660712e-07	4.07305838151043e-05	0.046953046953047	0.136506868284446	Arecales
Arecales - Fabales	metastat	bASV2170|Chitinophagaceae	Bacteria	0.000432966611728876	2.22801689262528e-07	6.60958438464558e-05	0.000267392417244853	2.79032316608692e-07	4.92581766868239e-05	0.046953046953047	0.136506868284446	Arecales
Arecales - Fabales	metastat	bASV2224|Reyranella	Bacteria	0.000370954256881285	2.0793314911786e-07	6.38523341072073e-05	0.00021441776990046	1.8333503532315e-07	3.99276558097539e-05	0.046953046953047	0.136506868284446	Arecales
Arecales - Fabales	metastat	bASV138|Mycobacterium	Bacteria	0.000776507071536855	2.21560767842949e-07	6.59115223707836e-05	0.000992999792164312	8.19394363452916e-07	8.44107124590916e-05	0.047952047952048	0.137751611764243	Fabales
Arecales - Fabales	metastat	bASV368|Burkholderia-Caballeronia-Paraburkholderia	Bacteria	0.000446596389702633	2.91798936960718e-07	7.56409134235136e-05	0.000682877862995433	9.57870872754209e-07	9.12650641647346e-05	0.047952047952048	0.137751611764243	Fabales
Arecales - Fabales	metastat	bASV467|Xanthobacteraceae	Bacteria	0.000670967412763895	2.59343461776046e-07	7.13103492992243e-05	0.000493620952832785	3.2029453576291e-07	5.27747086794349e-05	0.047952047952048	0.137751611764243	Arecales
Arecales - Fabales	metastat	bASV1627|Gaiellales	Bacteria	0.000320943722113473	2.06720479787626e-07	6.36658679429868e-05	0.000169425484613256	1.69955076862723e-07	3.84430778370943e-05	0.047952047952048	0.137751611764243	Arecales
Arecales - Fabales	metastat	bASV3838|uncultured_bacterium	Bacteria	0.000351825293295804	1.96588830781515e-07	6.20860931006316e-05	0.000207376781694631	1.60394323034893e-07	3.73461275607214e-05	0.047952047952048	0.137751611764243	Arecales
Arecales - Fabales	metastat	bASV2936|SC-I-84	Bacteria	0.000220199596472447	1.16657797980129e-07	4.78268523272434e-05	0.000105633474115063	7.14199469755015e-08	2.49207346837583e-05	0.047952047952048	0.137751611764243	Arecales
Arecales - Fabales	metastat	bASV279|Desulfobacterota	Bacteria	0.000821686897691936	3.17872995592521e-07	7.89481084963248e-05	0.00104833648109187	8.83925904442873e-07	8.76716157747005e-05	0.048951048951049	0.138967067162163	Fabales
Arecales - Fabales	metastat	bASV2456|Sandaracinaceae	Bacteria	0.000425193070126988	1.79927811927059e-07	5.93969385767927e-05	0.000274749782165522	2.34925556341704e-07	4.51976871610757e-05	0.048951048951049	0.138967067162163	Arecales
Arecales - Fabales	metastat	bASV891|bacterium_Ellin334	Bacteria	0.000416038321175972	9.91311524176207e-07	0.00013941836631592	0.000133693802543732	1.57156597242224e-07	3.69672707466229e-05	0.048951048951049	0.138967067162163	Arecales
Arecales - Fabales	metastat	bASV1723|Rhodanobacter	Bacteria	0.000361757166554929	2.16039189543041e-07	6.50850408316659e-05	0.000182505345899456	2.80104161696547e-07	4.93526935696388e-05	0.048951048951049	0.138967067162163	Arecales
Arecales - Fabales	metastat	bASV539|Chryseobacterium	Bacteria	0.000152211859572075	9.65820410614206e-08	4.35174161802863e-05	0.000304156275823904	4.24750336878661e-07	6.07740173943538e-05	0.048951048951049	0.138967067162163	Fabales
Arecales - Fabales	metastat	bASV235|Pseudomonas_cichorii	Bacteria	0.000239710513264946	1.6490614983112e-07	5.68634673429017e-05	0.000432660669556732	7.96810075692137e-07	8.32393132293158e-05	0.048951048951049	0.138967067162163	Fabales
Arecales - Fabales	metastat	bASV316|Intrasporangium	Bacteria	0.000855720614264138	1.6854179298708e-07	5.74868771021904e-05	0.00106238922771686	8.55870743986341e-07	8.62690807620749e-05	0.04995004995005	0.140426400342189	Fabales
Arecales - Fabales	metastat	bASV935|Rhizobiaceae	Bacteria	0.000400856600067058	2.05334054823351e-07	6.34520128736099e-05	0.000588120376704829	5.32457416798556e-07	6.80445772556527e-05	0.04995004995005	0.140426400342189	Fabales
Arecales - Fabales	metastat	bASV1664|Rhizobiales	Bacteria	0.000302744470243229	1.48293648545613e-07	5.39232658407628e-05	0.000492756106288668	7.48144117863629e-07	8.06573060850728e-05	0.04995004995005	0.140426400342189	Fabales
Arecales - Fabales	metastat	bASV1523|Comamonadaceae	Bacteria	0.000240299647463354	1.27224385362548e-07	4.99459286771455e-05	0.000121165540323375	8.35423788418617e-08	2.69528378504027e-05	0.04995004995005	0.140426400342189	Arecales
Arecales - Fabales	metastat	bASV2426|uncultured_Chloroflexi	Bacteria	0.000160389771337233	1.15910345213338e-07	4.76733874077372e-05	0.000357290846312752	7.64518348005978e-07	8.15351803507823e-05	0.04995004995005	0.140426400342189	Fabales
Arecales - Fabales	metastat	fASV2|Cladosporium	Fungi	0.00349209763326131	1.09081962723104e-06	0.000146248487656403	0.00475170463439304	6.10330790148125e-06	0.000230374136181942	0.000999000999000999	0.0179499859037863	Fabales
Arecales - Fabales	metastat	fASV6|Cladosporium	Fungi	0.00333241260464176	9.13292723878255e-07	0.000133819656509054	0.00465720145641954	6.49443013634282e-06	0.0002376411276135	0.000999000999000999	0.0179499859037863	Fabales
Arecales - Fabales	metastat	fASV7|Cladosporium	Fungi	0.00343214455580492	1.28866215763797e-06	0.000158958753907678	0.0046568897115071	7.01798157471001e-06	0.000247034262272683	0.000999000999000999	0.0179499859037863	Fabales
Arecales - Fabales	metastat	fASV3|Fusarium_oxysporum	Fungi	0.00346011113557758	1.20635238981763e-06	0.000153798466922778	0.00429513759143447	4.04973548346458e-06	0.000187656844161255	0.000999000999000999	0.0179499859037863	Fabales
Arecales - Fabales	metastat	fASV16|Pleosporales	Fungi	0.00311769829786965	1.51297479707625e-06	0.000172238707878604	0.00422565241617344	5.7439991950556e-06	0.000223490087224109	0.000999000999000999	0.0179499859037863	Fabales
Arecales - Fabales	metastat	fASV401|Pleosporales	Fungi	0.00183032400746215	1.61921978108767e-06	0.000178183634131497	0.00296256031930655	4.97656517994292e-06	0.000208025190363068	0.000999000999000999	0.0179499859037863	Fabales
Arecales - Fabales	metastat	fASV122|Pleosporales	Fungi	0.00149758125247265	2.06161981790004e-06	0.000201057001862756	0.00241903594919807	4.08040087188713e-06	0.000188365991389269	0.000999000999000999	0.0179499859037863	Fabales
Arecales - Fabales	metastat	fASV66|Mortierella	Fungi	0.00210474690888606	2.68448601067001e-06	0.000229427506200483	0.00119360755355199	2.41901676143274e-06	0.000145034231684402	0.000999000999000999	0.0179499859037863	Arecales
Arecales - Fabales	metastat	fASV518|Pestalotiopsis	Fungi	0.00225391161345489	2.35348505707154e-06	0.000214817983011042	0.00113936644896405	2.69439027356843e-06	0.000153066915562199	0.000999000999000999	0.0179499859037863	Arecales
Arecales - Fabales	metastat	fASV221|Helotiales	Fungi	0.00230420273770213	2.21921934610811e-06	0.000208600347136934	0.00123058446176842	2.79890367164879e-06	0.00015600734853508	0.000999000999000999	0.0179499859037863	Arecales
Arecales - Fabales	metastat	fASV290|Didymellaceae	Fungi	0.000962609888368337	1.79935445038431e-06	0.00018783359606699	0.00189006979162658	5.93438871112384e-06	0.000227163773733245	0.000999000999000999	0.0179499859037863	Fabales
Arecales - Fabales	metastat	fASV797|Mycosphaerellaceae	Fungi	0.00101988642020265	1.50456215271554e-06	0.000171759188053207	0.00197423822912496	4.32329774837895e-06	0.000193891447630278	0.000999000999000999	0.0179499859037863	Fabales
Arecales - Fabales	metastat	fASV866|Cercospora	Fungi	0.00108294374133965	1.74364521365398e-06	0.000184903006563854	0.00192949023621847	4.64962361200239e-06	0.000201075880377498	0.000999000999000999	0.0179499859037863	Fabales
Arecales - Fabales	metastat	fASV254|Hypocreales	Fungi	0.00103444560407374	1.94173280022417e-06	0.000195123530516589	0.00193242463378756	4.39408735561475e-06	0.000195472390035563	0.000999000999000999	0.0179499859037863	Fabales
Arecales - Fabales	metastat	fASV1108|Herpotrichiellaceae	Fungi	0.00190153378927514	1.38637584072961e-06	0.000164875225592889	0.0010562383944827	2.29445800648068e-06	0.000141250871685827	0.000999000999000999	0.0179499859037863	Arecales
Arecales - Fabales	metastat	fASV788|Exophiala	Fungi	0.00218636869760885	1.56253041754594e-06	0.000175036714218561	0.000969082082257073	4.95731875736442e-06	0.000207622541235907	0.000999000999000999	0.0179499859037863	Arecales
Arecales - Fabales	metastat	fASV408|Plectosphaerellaceae	Fungi	0.000581258801924522	1.11747609631761e-06	0.000148024646617472	0.0016794697210748	3.33974150346972e-06	0.000170414877475395	0.000999000999000999	0.0179499859037863	Fabales
Arecales - Fabales	metastat	fASV553|Microdochium	Fungi	0.00109673973830606	1.76909863024448e-06	0.000186247707197072	0.000281506427100741	6.72836193332e-07	7.64901922290354e-05	0.000999000999000999	0.0179499859037863	Arecales
Arecales - Fabales	metastat	fASV1424|Sordariomycetes	Fungi	0.00142805806956992	1.93064259921281e-06	0.000194565508863896	0.000368259270528536	7.54873290436219e-07	8.10192296248897e-05	0.000999000999000999	0.0179499859037863	Arecales
Arecales - Fabales	metastat	fASV1873|Pleosporales	Fungi	0.000535493903281554	1.00871646410451e-06	0.000140636958862625	0.00139031531884997	3.52726415933372e-06	0.000175133840976197	0.000999000999000999	0.0179499859037863	Fabales
Arecales - Fabales	metastat	fASV646|Hypocreales	Fungi	0.00142364762639757	2.42205246162946e-06	0.000217924814415047	0.000396171812345767	9.83360593179958e-07	9.24714100672512e-05	0.000999000999000999	0.0179499859037863	Arecales
Arecales - Fabales	metastat	fASV1193|Diaporthe	Fungi	0.000538040884507103	1.12175050626863e-06	0.000148307477781977	0.00144327506142839	3.3059410957777e-06	0.000169550328446535	0.000999000999000999	0.0179499859037863	Fabales
Arecales - Fabales	metastat	fASV1442|Podosphaera	Fungi	0.000305088309680559	5.17349185415998e-07	0.000100717931247735	0.000966759539427658	3.63811864297381e-06	0.000177864595371672	0.000999000999000999	0.0179499859037863	Fabales
Arecales - Fabales	metastat	fASV514|Talaromyces	Fungi	0.0012852683199042	2.2642133695634e-06	0.000210704391457972	0.000360946739081737	1.26282621477557e-06	0.000104790732031929	0.000999000999000999	0.0179499859037863	Arecales
Arecales - Fabales	metastat	fASV614|Eurotiomycetes	Fungi	0.00101479799408395	1.86340282263161e-06	0.000191147352185895	0.000358692853424817	9.34488606353305e-07	9.01442614997377e-05	0.000999000999000999	0.0179499859037863	Arecales
Arecales - Fabales	metastat	fASV2280|Pleosporales	Fungi	0.000752137882510734	1.16844952012253e-06	0.00015136305660353	0.000135197882769362	3.24962446308714e-07	5.3157881849115e-05	0.000999000999000999	0.0179499859037863	Arecales
Arecales - Fabales	metastat	fASV4784|Annulohypoxylon	Fungi	0.000598795439263229	8.43667868636577e-07	0.000128617678521143	0.000110142255146155	3.5522033304813e-07	5.55776255456104e-05	0.000999000999000999	0.0179499859037863	Arecales
Arecales - Fabales	metastat	fASV1765|Sordariomycetes	Fungi	0.00125173804751221	2.03677261157298e-06	0.0001998417320631	0.000376427362885884	1.16336938978727e-06	0.000100579598146779	0.000999000999000999	0.0179499859037863	Arecales
Arecales - Fabales	metastat	fASV6270|Basidiomycota	Fungi	0.000873076128973714	1.08887146461476e-06	0.000146117832158841	0.000268305746823366	7.05405173233413e-07	7.83195890446103e-05	0.000999000999000999	0.0179499859037863	Arecales
Arecales - Fabales	metastat	fASV2926|Pleosporales	Fungi	0.000202193771489121	4.00844639723975e-07	8.86549424347969e-05	0.00084862319988604	1.78112835150194e-06	0.000124451085257446	0.000999000999000999	0.0179499859037863	Fabales
Arecales - Fabales	metastat	fASV10|Pleosporales	Fungi	0.00322976251848582	1.13367488955534e-06	0.000149093659835171	0.00401665808905784	3.32077182391097e-06	0.000169930211350603	0.001998001998002	0.0244772535051631	Fabales
Arecales - Fabales	metastat	fASV98|Ophiocordycipitaceae	Fungi	0.00272920320463501	8.45653853552608e-07	0.000128768971840559	0.00346283091575746	4.42522998185348e-06	0.000196163861890434	0.001998001998002	0.0244772535051631	Fabales
Arecales - Fabales	metastat	fASV370|Lasiodiplodia	Fungi	0.00151245815217466	1.73535385959976e-06	0.000184462858772876	0.00242141685324136	4.53577710582791e-06	0.00019859894272296	0.001998001998002	0.0244772535051631	Fabales
Arecales - Fabales	metastat	fASV413|Corynespora	Fungi	0.000732205428170934	1.28147835003667e-06	0.000158515067016695	0.00177104546541414	4.81556160344084e-06	0.000204632472314568	0.001998001998002	0.0244772535051631	Fabales
Arecales - Fabales	metastat	fASV310|Hannaella	Fungi	0.000804308134159535	1.22657123362568e-06	0.000155081966538994	0.00162516447947796	3.0428642709677e-06	0.000162664345548625	0.001998001998002	0.0244772535051631	Fabales
Arecales - Fabales	metastat	fASV460|Periconiaceae	Fungi	0.00114633765929743	1.60914486768995e-06	0.000177628432833213	0.00198862506802374	4.44243163005766e-06	0.000196544753838333	0.001998001998002	0.0244772535051631	Fabales
Arecales - Fabales	metastat	fASV488|Pleosporales	Fungi	0.00110858380034931	1.56390633861565e-06	0.00017511376350514	0.0004168273291321	8.26828479087387e-07	8.47927642056175e-05	0.001998001998002	0.0244772535051631	Arecales
Arecales - Fabales	metastat	fASV433|Pleosporales	Fungi	0.000780776362855983	1.42550310177718e-06	0.000167185648939486	0.00187060216843277	3.28341130594861e-06	0.000168971603118461	0.001998001998002	0.0244772535051631	Fabales
Arecales - Fabales	metastat	fASV586|Sordariales	Fungi	0.00088873839203257	1.39507187784494e-06	0.000165391506873779	0.000303534239759475	8.63723213745818e-07	8.66639292974187e-05	0.001998001998002	0.0244772535051631	Arecales
Arecales - Fabales	metastat	fASV556|Pleosporales	Fungi	0.000592103545333257	1.13176683449864e-06	0.000148968139408388	0.00140226027859878	3.23236223420638e-06	0.000167652908381427	0.001998001998002	0.0244772535051631	Fabales
Arecales - Fabales	metastat	fASV1333|Nectriaceae	Fungi	0.000388948395981983	6.64567327722568e-07	0.000114152231323478	0.000998118453759592	2.19045805195366e-06	0.000138012540449541	0.001998001998002	0.0244772535051631	Fabales
Arecales - Fabales	metastat	fASV2876|Arthrinium	Fungi	0.000472322257121604	6.78093366833348e-07	0.000115308058561756	0.00123569579658599	2.56524461306602e-06	0.000149353523213302	0.001998001998002	0.0244772535051631	Fabales
Arecales - Fabales	metastat	fASV465|Hypocreales	Fungi	0.00139991164697712	2.52627963456506e-06	0.000222564361018096	0.000409911583935943	1.04446909519192e-06	9.53013114190491e-05	0.001998001998002	0.0244772535051631	Arecales
Arecales - Fabales	metastat	fASV220|Sordariomycetes	Fungi	0.00110136758763423	1.75735666011131e-06	0.000185628590814219	0.000309604317442797	1.32427903471959e-06	0.000107310157334368	0.001998001998002	0.0244772535051631	Arecales
Arecales - Fabales	metastat	fASV751|Volutella	Fungi	0.000134188862763472	2.94374632829286e-07	7.59740194020538e-05	0.000197152709569613	5.4861770788856e-07	6.90694488485926e-05	0.00259360453869637	0.0273813344295045	Fabales
Arecales - Fabales	metastat	fASV48|Pestalotiopsis	Fungi	0.00303424586687998	9.36155031255059e-07	0.000135484246335141	0.00372618717045699	3.56596857975622e-06	0.000176092085093745	0.002997002997003	0.0273813344295045	Fabales
Arecales - Fabales	metastat	fASV9|Nectriaceae	Fungi	0.00309872272307433	1.19833769711057e-06	0.000153286716940521	0.0040391872769112	4.77478683004687e-06	0.000203764289017159	0.002997002997003	0.0273813344295045	Fabales
Arecales - Fabales	metastat	fASV60|Sordariomycetes	Fungi	0.00245649093927932	1.8425202614767e-06	0.000190073270778006	0.00339878924691618	4.71653818902773e-06	0.000202517593203067	0.002997002997003	0.0273813344295045	Fabales
Arecales - Fabales	metastat	fASV112|Hannaella	Fungi	0.00224366431633846	1.97217793035028e-06	0.000196647287032047	0.00320201722109421	6.20682986088878e-06	0.000232319679693619	0.002997002997003	0.0273813344295045	Fabales
Arecales - Fabales	metastat	fASV192|Xylariales	Fungi	0.00166191624172	1.96274514167736e-06	0.000196176448271496	0.00247766609716816	3.16705146518935e-06	0.000165950528646848	0.002997002997003	0.0273813344295045	Fabales
Arecales - Fabales	metastat	fASV55|Pleosporales	Fungi	0.00181196853848705	1.96316262223431e-06	0.000196197310760602	0.00106530015156611	2.27760177369785e-06	0.000140731065563947	0.002997002997003	0.0273813344295045	Arecales
Arecales - Fabales	metastat	fASV134|Fusarium	Fungi	0.00148310194290343	2.56429561705372e-06	0.000224232705501984	0.00240569800683591	4.45412104961956e-06	0.000196803169151302	0.002997002997003	0.0273813344295045	Fabales
Arecales - Fabales	metastat	fASV951|Pleosporales	Fungi	0.00109947322946586	1.42686519359975e-06	0.00016726550419651	0.00184646023170586	3.60157027092398e-06	0.000176968930481768	0.002997002997003	0.0273813344295045	Fabales
Arecales - Fabales	metastat	fASV1450|Nectriaceae	Fungi	0.00139739050209892	2.19831092664895e-06	0.000207615355445222	0.000635959371809022	1.31240380746201e-06	0.000106827931840923	0.002997002997003	0.0273813344295045	Arecales
Arecales - Fabales	metastat	fASV1176|Corynespora	Fungi	0.000717003261139676	1.40809618856796e-06	0.00016616175609209	0.00147682757219307	2.94036885333779e-06	0.000159901297091778	0.002997002997003	0.0273813344295045	Fabales
Arecales - Fabales	metastat	fASV3025|Clavicipitaceae	Fungi	0.000981681852120369	1.71617088620488e-06	0.000183440479538811	0.000345470412641176	8.0205497226214e-07	8.35128197533112e-05	0.002997002997003	0.0273813344295045	Arecales
Arecales - Fabales	metastat	fASV2098|Nectriaceae	Fungi	0.000299817947145307	5.01060344481373e-07	9.91196884422549e-05	0.000934794085269737	2.26907157066355e-06	0.000140467281372584	0.002997002997003	0.0273813344295045	Fabales
Arecales - Fabales	metastat	fASV1313|Hypocreales	Fungi	0.000458572662308807	8.22880457327856e-07	0.000127023269238345	0.001086667809136	2.61254353560575e-06	0.000150724151597654	0.002997002997003	0.0273813344295045	Fabales
Arecales - Fabales	metastat	fASV1380|Fungi	Fungi	0.000255474730007368	5.23268062659506e-07	0.00010129243847081	0.000942341203198031	2.87166260682092e-06	0.00015802208450007	0.002997002997003	0.0273813344295045	Fabales
Arecales - Fabales	metastat	fASV44|Sordariomycetes	Fungi	0.0030749047341824	1.15959836795843e-06	0.000150788669670986	0.0038961650342427	5.36227705452513e-06	0.000215936324240053	0.003996003996004	0.0312173667891935	Fabales
Arecales - Fabales	metastat	fASV31|Chaetomellaceae	Fungi	0.001441338655259	2.0634831726709e-06	0.000201147842061743	0.00230231956064407	4.12619403153685e-06	0.000189420030884594	0.003996003996004	0.0312173667891935	Fabales
Arecales - Fabales	metastat	fASV637|Pleosporales	Fungi	0.00126106707108763	1.89798774955855e-06	0.000192913053134762	0.000552114988693078	1.23483301458557e-06	0.000103622769639209	0.003996003996004	0.0312173667891935	Arecales
Arecales - Fabales	metastat	fASV510|Sordariomycetes	Fungi	0.000619823159821847	9.67039635384701e-07	0.000137700985755845	0.00117857376577703	2.20467368389703e-06	0.0001384596530118	0.003996003996004	0.0312173667891935	Fabales
Arecales - Fabales	metastat	fASV307|Hypocreales	Fungi	0.0010098184730894	1.87969547100854e-06	0.00019198118121666	0.000353112268941695	1.03373657015475e-06	9.48104089935255e-05	0.003996003996004	0.0312173667891935	Arecales
Arecales - Fabales	metastat	fASV145|Chaetothyriales	Fungi	0.000348525768904905	5.9171655017424e-07	0.000107713904847676	0.000929954099684734	2.52711821819658e-06	0.000148239471895296	0.003996003996004	0.0312173667891935	Fabales
Arecales - Fabales	metastat	fASV836|Didymellaceae	Fungi	0.000845786449495318	1.47219943759721e-06	0.000169901900045765	0.0017439262860499	5.76571457044431e-06	0.0002239121444644	0.003996003996004	0.0312173667891935	Fabales
Arecales - Fabales	metastat	fASV1523|Chaetothyriales	Fungi	0.00092102983572873	1.42396800482645e-06	0.000167095605181904	0.000337830975323608	7.74988732569794e-07	8.20916101506643e-05	0.003996003996004	0.0312173667891935	Arecales
Arecales - Fabales	metastat	fASV2342|Talaromyces	Fungi	0.00145782691427357	2.59113503630421e-06	0.000225403126285547	0.000548116411847113	1.34970734698686e-06	0.000108335523379789	0.003996003996004	0.0312173667891935	Arecales
Arecales - Fabales	metastat	fASV2338|Westerdykella	Fungi	0.00142649419838635	2.15518923479905e-06	0.000205568996804091	0.000637090891095604	1.63703337155831e-06	0.000119310824304248	0.003996003996004	0.0312173667891935	Arecales
Arecales - Fabales	metastat	fASV178|Arthrinium	Fungi	0.00120836927332136	1.78633938894891e-06	0.000187153045736397	0.00200461920368823	5.35288044742681e-06	0.000215747042851956	0.004995004995005	0.0354276037574729	Fabales
Arecales - Fabales	metastat	fASV358|Pleosporales	Fungi	0.00118163967009901	1.7560385279525e-06	0.000185558960977552	0.000562813007696344	1.1582919035615e-06	0.000100359870014017	0.004995004995005	0.0354276037574729	Arecales
Arecales - Fabales	metastat	fASV869|Hypocreales	Fungi	0.00114922678259948	1.31751723821353e-06	0.00016072856416182	0.000581787105590098	1.18227174273857e-06	0.000101393411274602	0.004995004995005	0.0354276037574729	Arecales
Arecales - Fabales	metastat	fASV2315|Termitomyces	Fungi	0.000704425171842759	1.12397543402667e-06	0.000148454484608997	0.000216007558872609	5.10708331034354e-07	6.66403932235876e-05	0.004995004995005	0.0354276037574729	Arecales
Arecales - Fabales	metastat	fASV607|Fungi	Fungi	0.000475698511378779	1.07390713781614e-06	0.00014511031218448	0.00116675138719131	3.93571970061903e-06	0.000184996350154808	0.004995004995005	0.0354276037574729	Fabales
Arecales - Fabales	metastat	fASV3198|Pleosporales	Fungi	0.000291304504182112	4.79967928203331e-07	9.70110088965378e-05	0.000781720949312542	1.82685882966654e-06	0.000126038601045958	0.004995004995005	0.0354276037574729	Fabales
Arecales - Fabales	metastat	fASV1392|Pleosporales	Fungi	0.00110767173883312	2.12305644795421e-06	0.000204030776607412	0.000422015787792868	1.14325389277976e-06	9.97062595732328e-05	0.004995004995005	0.0354276037574729	Arecales
Arecales - Fabales	metastat	fASV1809|Diaporthe	Fungi	0.00064846024125071	1.12637294268999e-06	0.000148612731535066	0.00125957757937886	2.70000673954957e-06	0.000153226366772642	0.00599400599400599	0.0419610060088511	Fabales
Arecales - Fabales	metastat	fASV42|Pleosporales	Fungi	0.00292544160102877	8.17757434486168e-07	0.000126627246277129	0.00351491287400737	2.92810925788531e-06	0.000159567602080702	0.00699300699300699	0.0454156269854834	Fabales
Arecales - Fabales	metastat	fASV536|Clavicipitaceae	Fungi	0.00242134602480466	7.36177204465757e-07	0.00012014510870771	0.00296498246188931	2.4689728444641e-06	0.000146524158698477	0.00699300699300699	0.0454156269854834	Fabales
Arecales - Fabales	metastat	fASV239|Nectriaceae	Fungi	0.00246187483108936	1.87035045203445e-06	0.000191503363613241	0.00179881176789602	2.82148426370167e-06	0.000156635391183854	0.00699300699300699	0.0454156269854834	Arecales
Arecales - Fabales	metastat	fASV148|Stachybotryaceae	Fungi	0.00153801797682969	2.14446206499582e-06	0.000205056762346994	0.00230789122653863	4.49399988095338e-06	0.000197682219317715	0.00699300699300699	0.0454156269854834	Fabales
Arecales - Fabales	metastat	fASV59|Hypocreales	Fungi	0.00162157017811906	3.40752674852143e-06	0.000258484525592942	0.000724523270294261	2.41591844225643e-06	0.000144941320728092	0.00699300699300699	0.0454156269854834	Arecales
Arecales - Fabales	metastat	fASV3373|Meira	Fungi	0.000376647407599989	6.04693528086745e-07	0.000108888639650049	0.000915094601744412	1.97114737868387e-06	0.000130921396221379	0.00699300699300699	0.0454156269854834	Fabales
Arecales - Fabales	metastat	fASV11|Fusarium_oxysporum	Fungi	0.00232916940164883	2.92383628525003e-06	0.000239437096624973	0.00308929345643927	3.92539836931117e-06	0.000184753616645454	0.00799200799200799	0.0484044563697608	Fabales
Arecales - Fabales	metastat	fASV70|Fusarium	Fungi	0.00245425027129696	1.88959872449083e-06	0.000192486247254637	0.00311035495715302	3.70388300194954e-06	0.000179464977858695	0.00799200799200799	0.0484044563697608	Fabales
Arecales - Fabales	metastat	fASV43|Didymellaceae	Fungi	0.00188208163584617	1.63915667198744e-06	0.000179277234755879	0.00264626306305711	5.25773398875577e-06	0.000213821013909252	0.00799200799200799	0.0484044563697608	Fabales
Arecales - Fabales	metastat	fASV1363|Psathyrella	Fungi	0.000881968029052191	1.60938165819191e-06	0.000177641501631241	0.000347213730268968	7.74047740362761e-07	8.20417571496243e-05	0.00799200799200799	0.0484044563697608	Arecales
Arecales - Fabales	metastat	fASV1105|Nectriaceae	Fungi	0.00148383112941715	2.24566697147697e-06	0.000209839666686817	0.000753280661462	1.86271975954299e-06	0.000127269647310192	0.00799200799200799	0.0484044563697608	Arecales
Arecales - Fabales	metastat	fASV2330|Rhytidhysteron_rufulum	Fungi	0.000232371384021825	4.19620158858695e-07	9.07074762747332e-05	0.000799159679220677	3.64712964465516e-06	0.000178084729337157	0.00799200799200799	0.0484044563697608	Fabales
Arecales - Fabales	metastat	fASV52|Trichoderma	Fungi	0.00241090608902571	2.6568053122667e-06	0.00022824158650244	0.001575225496904	3.90706959643726e-06	0.000184321779043848	0.00899100899100899	0.052112862301315	Arecales
Arecales - Fabales	metastat	fASV432|Periconia	Fungi	0.00131801138686779	2.27084477586439e-06	0.000211012720361128	0.00207504068412158	3.45830617766408e-06	0.00017341345862378	0.00899100899100899	0.052112862301315	Fabales
Arecales - Fabales	metastat	fASV997|Pleosporales	Fungi	0.00108199824515115	1.41929310478656e-06	0.000166821091485586	0.00171377019183425	3.5539229735179e-06	0.000175794419793662	0.00899100899100899	0.052112862301315	Fabales
Arecales - Fabales	metastat	fASV1482|Lophiostoma	Fungi	0.000563028731054865	1.01882558960411e-06	0.000141339917734441	0.000133531213020895	3.49420922098678e-07	5.51220718120978e-05	0.00899100899100899	0.052112862301315	Arecales
Arecales - Fabales	metastat	fASV312|Sordariomycetes	Fungi	0.00119764183808621	2.26400636120249e-06	0.000210694759289845	0.00054617943996091	1.30453122881477e-06	0.000106507041155881	0.00999000999000999	0.0566841660119567	Arecales
Arecales - Fabales	metastat	fASV3045|Meruliaceae	Fungi	0.0010888725764889	1.26184381230304e-06	0.000157296012458529	0.000582569224287841	1.10914167767968e-06	9.82074856652633e-05	0.00999000999000999	0.0566841660119567	Arecales
Arecales - Fabales	metastat	fASV67|Cladosporium	Fungi	0.00309295163880675	1.15647407890609e-06	0.000150585398799126	0.00370680674410827	3.40648283585309e-06	0.000172109238209294	0.010989010989011	0.0586484687945492	Fabales
Arecales - Fabales	metastat	fASV104|Trichosphaeriaceae	Fungi	0.00257165246192597	1.34022721801725e-06	0.000162107880928602	0.00313556106076184	2.99574742482215e-06	0.000161400054545062	0.010989010989011	0.0586484687945492	Fabales
Arecales - Fabales	metastat	fASV117|Arthrinium	Fungi	0.00105633981777036	1.72888040160564e-06	0.00018411848282494	0.00177082336713346	4.27117403718262e-06	0.000192719080014377	0.010989010989011	0.0586484687945492	Fabales
Arecales - Fabales	metastat	fASV1163|Dothideales	Fungi	0.000529596060319216	9.64899294057736e-07	0.000137548515081523	0.00110419325538441	2.57667783909911e-06	0.000149685985493084	0.010989010989011	0.0586484687945492	Fabales
Arecales - Fabales	metastat	fASV457|Mortierella	Fungi	0.00130854445693881	2.10677199713959e-06	0.000203246783113225	0.000683517122502928	2.54793781521635e-06	0.000148848852873918	0.010989010989011	0.0586484687945492	Arecales
Arecales - Fabales	metastat	fASV2340|Xylariales	Fungi	0.00019575210462392	2.94721047981015e-07	7.60187087371202e-05	0.000539565738016144	1.27852255226821e-06	0.000105439970651684	0.010989010989011	0.0586484687945492	Fabales
Arecales - Fabales	metastat	fASV1586|Dothideomycetes	Fungi	0.000129179080279176	2.01959808615979e-07	6.29285010736163e-05	0.0001853655539554	3.71627278611339e-07	5.68466494451703e-05	0.0116489325309947	0.0615609626177169	Fabales
Arecales - Fabales	metastat	fASV1065|Nectriaceae	Fungi	0.00116891032789637	1.95361433740891e-06	0.000195719604226572	0.000579209320250626	1.24356574095046e-06	0.000103988533688574	0.011988011988012	0.0621345665900295	Arecales
Arecales - Fabales	metastat	fASV752|Periconiaceae	Fungi	0.000290266233846599	5.77579732554844e-07	0.00010641941925792	0.000763667366873077	2.7552229325807e-06	0.0001547852069266	0.011988011988012	0.0621345665900295	Fabales
Arecales - Fabales	metastat	fASV161|Arthrinium	Fungi	0.00170323856781755	1.64305768108215e-06	0.00017949043784035	0.00247406689729458	5.86235392636168e-06	0.000225780846539326	0.012987012987013	0.0630675180403302	Fabales
Arecales - Fabales	metastat	fASV967|Pleosporales	Fungi	0.00138000471384594	1.59675965712565e-06	0.000176943530214633	0.000807027659878755	1.62911417027843e-06	0.000119021889483969	0.012987012987013	0.0630675180403302	Arecales
Arecales - Fabales	metastat	fASV359|Chaetosphaeriaceae	Fungi	0.00187680291934019	2.09024289364483e-06	0.000202447906329874	0.00114044582575005	4.65300683712926e-06	0.000201149021917869	0.012987012987013	0.0630675180403302	Arecales
Arecales - Fabales	metastat	fASV230|Lophiostoma	Fungi	0.00139313178758258	2.25028016566284e-06	0.000210055089210409	0.000751803411970102	1.9161636257689e-06	0.000129082502292102	0.012987012987013	0.0630675180403302	Arecales
Arecales - Fabales	metastat	fASV499|Saccharomycopsis_vini	Fungi	0.000701329520389196	1.06577897852059e-06	0.000144560115626045	0.000260136364017075	6.57141078664893e-07	7.55927923102457e-05	0.012987012987013	0.0630675180403302	Arecales
Arecales - Fabales	metastat	fASV3167|Pleosporales	Fungi	0.000502085365421789	8.72643655591795e-07	0.000130807721154237	0.000166499132219602	3.49454204894065e-07	5.51246969739529e-05	0.012987012987013	0.0630675180403302	Arecales
Arecales - Fabales	metastat	fASV5145|Agaricomycetes	Fungi	0.000477761797724831	7.04484106797494e-07	0.000117530480551959	0.000130429592321583	2.43300123739837e-07	4.59962308228796e-05	0.012987012987013	0.0630675180403302	Arecales
Arecales - Fabales	metastat	fASV415|Ganoderma	Fungi	0.00208928057642939	9.19320141818697e-07	0.000134260512190666	0.0016314810794088	2.15355790297042e-06	0.000136845133127241	0.013986013986014	0.0641070925135224	Arecales
Arecales - Fabales	metastat	fASV945|Phaeosphaeriaceae	Fungi	0.001046922171492	1.74200386046905e-06	0.000184815958295191	0.00167801409593928	2.88146976264513e-06	0.000158291688997274	0.013986013986014	0.0641070925135224	Fabales
Arecales - Fabales	metastat	fASV2751|Annulohypoxylon	Fungi	0.00113264942422482	1.3503036321364e-06	0.000162716138740434	0.000585187544252745	1.91394321838893e-06	0.000129007691661117	0.013986013986014	0.0641070925135224	Arecales
Arecales - Fabales	metastat	fASV1678|Pleosporales	Fungi	0.000578744450301212	1.05959103381424e-06	0.0001441398445284	0.00111015799629119	2.67179148569053e-06	0.000152423651185724	0.013986013986014	0.0641070925135224	Fabales
Arecales - Fabales	metastat	fASV708|Periconia	Fungi	9.96885057084863e-05	1.67600431929944e-07	5.73261107962026e-05	0.000455505193810859	2.04595373781367e-06	0.000133382540341474	0.013986013986014	0.0641070925135224	Fabales
Arecales - Fabales	metastat	fASV2841|Gyrodontaceae	Fungi	0.000847459003458274	1.31341581391857e-06	0.000160478195569695	0.000348787499008256	1.35945228751054e-06	0.000108725913374973	0.013986013986014	0.0641070925135224	Arecales
Arecales - Fabales	metastat	fASV53|Tremellales	Fungi	0.00271487874292381	8.16247336468215e-07	0.000126510275213798	0.00323624270762058	3.4055246527512e-06	0.000172085030871399	0.014985014985015	0.0641070925135224	Fabales
Arecales - Fabales	metastat	fASV275|Plectosphaerella	Fungi	0.000573204558668116	8.28250479486904e-07	0.000127437064781544	0.00101929414093832	1.97205785905786e-06	0.000130951629272792	0.014985014985015	0.0641070925135224	Fabales
Arecales - Fabales	metastat	fASV1985|Cyphellophora	Fungi	0.00070900892868313	1.16366680548097e-06	0.00015105295821632	0.000248814363536612	5.56720810704509e-07	6.95776582522386e-05	0.014985014985015	0.0641070925135224	Arecales
Arecales - Fabales	metastat	fASV815|Plectosphaerellaceae	Fungi	0.00107042199816856	1.5460056486104e-06	0.000174108690901008	0.000560802595801732	1.36332433637691e-06	0.000108880642124137	0.014985014985015	0.0641070925135224	Arecales
Arecales - Fabales	metastat	fASV1209|Didymellaceae	Fungi	0.000315170878584445	5.67248721003651e-07	0.000105463377251291	0.000810533439440755	2.95784011807998e-06	0.000160375649189238	0.014985014985015	0.0641070925135224	Fabales
Arecales - Fabales	metastat	fASV2189|Xylaria	Fungi	0.000933700015655712	1.31719360903276e-06	0.00016070882261814	0.000447751244883332	9.82465939418752e-07	9.24293356132251e-05	0.014985014985015	0.0641070925135224	Arecales
Arecales - Fabales	metastat	fASV2372|Pestalotiopsis	Fungi	0.000893176263686604	1.45136868829295e-06	0.000168695612196558	0.000417273635907151	1.06511603631725e-06	9.62386542750454e-05	0.014985014985015	0.0641070925135224	Arecales
Arecales - Fabales	metastat	fASV1714|Capnodiales	Fungi	0.000748506643954724	1.49680986784447e-06	0.00017131612035938	0.000250138187628439	5.8394864968591e-07	7.1258784336353e-05	0.014985014985015	0.0641070925135224	Arecales
Arecales - Fabales	metastat	fASV5148|Cunninghamella_binariae	Fungi	0.000635344626627815	8.97515770073206e-07	0.000132658766890123	0.000236391338286293	4.93975046820884e-07	6.55395696487765e-05	0.014985014985015	0.0641070925135224	Arecales
Arecales - Fabales	metastat	fASV58|Sordariomycetes	Fungi	0.00154681547615992	1.95277464815171e-06	0.000195677538269897	0.0023520405549155	7.00215289445143e-06	0.000246755518760388	0.015984015984016	0.0667906452233908	Fabales
Arecales - Fabales	metastat	fASV283|Pleosporales	Fungi	0.00109406888633635	1.45858480399373e-06	0.000169114464310693	0.00164440990381869	2.64061066086881e-06	0.000151531619913607	0.015984015984016	0.0667906452233908	Fabales
Arecales - Fabales	metastat	fASV1190|Pleosporales	Fungi	0.000745320021608321	1.27404847228958e-06	0.000158054872097995	0.00131143309286609	2.86348477212173e-06	0.000157796918802831	0.015984015984016	0.0667906452233908	Fabales
Arecales - Fabales	metastat	fASV486|Nectriaceae	Fungi	0.000975445544701724	1.41004414847533e-06	0.000166276650435076	0.00158262552827845	3.4500312303166e-06	0.000173205864704318	0.016983016983017	0.0693522182646288	Fabales
Arecales - Fabales	metastat	fASV725|Pleosporales	Fungi	0.00127532342716138	1.93216189856468e-06	0.000194642049472453	0.000693581854443579	1.94430449411687e-06	0.000130026903373941	0.016983016983017	0.0693522182646288	Arecales
Arecales - Fabales	metastat	fASV1532|Ascomycota	Fungi	0.000897096972744795	1.92591368214558e-06	0.000194327078338052	0.000320642453819756	8.06543076943035e-07	8.37461525108719e-05	0.016983016983017	0.0693522182646288	Arecales
Arecales - Fabales	metastat	fASV101|Didymellaceae	Fungi	0.000774054750843417	1.85105299718743e-06	0.000190512878324791	0.00155881394140028	6.05759444256228e-06	0.00022950976947213	0.017982017982018	0.0717999436151451	Fabales
Arecales - Fabales	metastat	fASV329|Exophiala	Fungi	0.000130744659091778	3.00273180685449e-07	7.67314109423571e-05	0.000513983717136918	2.14469805650447e-06	0.00013656334910008	0.017982017982018	0.0717999436151451	Fabales
Arecales - Fabales	metastat	fASV3363|Polyporaceae	Fungi	0.000404557258686369	6.25471681804271e-07	0.000110743625656799	9.32870897247926e-05	2.02004851480672e-07	4.19113818182948e-05	0.017982017982018	0.0717999436151451	Arecales
Arecales - Fabales	metastat	fASV2110|Xylaria	Fungi	0.00014527846196495	2.60292180476411e-07	7.14406624033925e-05	0.000212430061936808	4.93669668283889e-07	6.55193080260142e-05	0.0185620359058084	0.073570912750961	Fabales
Arecales - Fabales	metastat	fASV62|Cladosporium	Fungi	0.00276870044064859	1.28669891701045e-06	0.000158837623155273	0.0034094546058485	5.64172445370199e-06	0.000221491475028842	0.018981018981019	0.0741412461243347	Fabales
Arecales - Fabales	metastat	fASV72|Hypocreales	Fungi	0.00224424243680861	1.00709855371973e-06	0.00014052412769732	0.0028488050913633	5.53345074492617e-06	0.000219355790895426	0.018981018981019	0.0741412461243347	Fabales
Arecales - Fabales	metastat	fASV1|Tremellales	Fungi	0.00343897497468964	1.61903004663646e-06	0.000178173194361414	0.00408059718894705	4.12653622245406e-06	0.000189427885152935	0.01998001998002	0.0763829187395161	Fabales
Arecales - Fabales	metastat	fASV325|Didymellaceae	Fungi	0.00127376270985214	2.02660329528161e-06	0.000199342217092431	0.00188460442074969	3.47846993736321e-06	0.000173918270094673	0.01998001998002	0.0763829187395161	Fabales
Arecales - Fabales	metastat	fASV435|Tolypocladium	Fungi	0.00103013878543736	2.30592124898915e-06	0.000212636173162146	0.000450262045492555	1.29696399890313e-06	0.000106197682726833	0.01998001998002	0.0763829187395161	Arecales
Arecales - Fabales	metastat	fASV137|Plectosphaerellaceae	Fungi	0.0010447324676417	1.35171274887566e-06	0.000162801018260272	0.00159780851442215	3.36357631477588e-06	0.000171021898287042	0.020979020979021	0.076928511016227	Fabales
Arecales - Fabales	metastat	fASV418|Cladosporium	Fungi	0.00118256630555078	2.08890300958118e-06	0.000202383009516134	0.00184214996621878	4.28990156099632e-06	0.000193141118964219	0.020979020979021	0.076928511016227	Fabales
Arecales - Fabales	metastat	fASV613|Sordariomycetes	Fungi	0.000553962339847968	1.00442880151808e-06	0.000140337743970421	0.0010631377975441	3.32271495077735e-06	0.000169979920828963	0.020979020979021	0.076928511016227	Fabales
Arecales - Fabales	metastat	fASV579|Cyberlindnera	Fungi	0.000946590342476333	1.78887103042553e-06	0.000187285617593459	0.000455838857286684	9.22876439118847e-07	8.95824341825836e-05	0.020979020979021	0.076928511016227	Arecales
Arecales - Fabales	metastat	fASV2406|Basidiomycota	Fungi	0.000483904339377522	7.93164027951277e-07	0.000124708603721563	0.000148433893865708	3.09597486679594e-07	5.18859524156918e-05	0.020979020979021	0.076928511016227	Arecales
Arecales - Fabales	metastat	fASV5146|Fungi	Fungi	0.000423702262669153	7.68415148928681e-07	0.000122747560890162	8.90835136819476e-05	2.3952860271518e-07	4.56383327359207e-05	0.020979020979021	0.076928511016227	Arecales
Arecales - Fabales	metastat	fASV783|Trichomeriaceae	Fungi	0.000693026893959331	1.38559028725905e-06	0.000164828507865234	0.0012409397406895	3.06314269832825e-06	0.000163205463951805	0.021978021978022	0.0789799379766596	Fabales
Arecales - Fabales	metastat	fASV1041|Hannaella	Fungi	0.000674786870971637	1.2615154802717e-06	0.000157275546899021	0.00128473590542501	4.93887878360918e-06	0.000207236029761681	0.021978021978022	0.0789799379766596	Fabales
Arecales - Fabales	metastat	fASV1207|Chaetothyriales	Fungi	0.000809067452594413	2.2934556740095e-06	0.000212060649575129	0.000308814278077927	7.54579378515674e-07	8.10034555632028e-05	0.021978021978022	0.0789799379766596	Arecales
Arecales - Fabales	metastat	fASV664|Trichoderma	Fungi	0.000607526576033887	9.15702347445191e-07	0.000133996074528776	0.00109791027046764	3.26426941305707e-06	0.000168478341094301	0.023976023976024	0.0828460887867059	Fabales
Arecales - Fabales	metastat	fASV411|Exophiala	Fungi	0.000964260321271835	1.51192664233502e-06	0.000172179036000152	0.00152055809538211	3.30269388129225e-06	0.000169467038767509	0.023976023976024	0.0828460887867059	Fabales
Arecales - Fabales	metastat	fASV1621|Pleosporales	Fungi	0.000690282812339634	1.29321292993955e-06	0.000159239179454444	0.00119733719531608	2.60579451768927e-06	0.000150529341865682	0.023976023976024	0.0828460887867059	Fabales
Arecales - Fabales	metastat	fASV498|Sordariales	Fungi	0.00111500019417572	3.04554945734018e-06	0.000244369916369176	0.000523039993625698	1.36101591396197e-06	0.000108788423055827	0.023976023976024	0.0828460887867059	Arecales
Arecales - Fabales	metastat	fASV3162|Pleosporales	Fungi	0.00100819750814073	1.4849555862756e-06	0.000170636385924815	0.000547817019041324	1.19364079517192e-06	0.000101879758418481	0.023976023976024	0.0828460887867059	Arecales
Arecales - Fabales	metastat	fASV1987|Pleosporales	Fungi	0.000490340907231967	1.43460192629424e-06	0.000167718363738683	9.73851207627104e-05	2.17703341216718e-07	4.35094533672774e-05	0.023976023976024	0.0828460887867059	Arecales
Arecales - Fabales	metastat	fASV208|Pleosporales	Fungi	0.000798678272210568	1.82652642317657e-06	0.000189246515401731	0.00147227297900155	5.21755400174211e-06	0.000213002429088866	0.024975024975025	0.0852056292901248	Fabales
Arecales - Fabales	metastat	fASV1091|Strelitziana	Fungi	0.000845271008943958	1.69522293093924e-06	0.000182317484933657	0.00138885172449121	3.20669304798478e-06	0.000166985889744555	0.024975024975025	0.0852056292901248	Fabales
Arecales - Fabales	metastat	fASV156|Pseudocercospora	Fungi	0.00189851282487166	1.57229400112068e-06	0.000175582727338486	0.00247972139921365	4.85602870480322e-06	0.000205490478036103	0.025974025974026	0.0869626646270392	Fabales
Arecales - Fabales	metastat	fASV680|Fusarium	Fungi	0.000455322354965406	1.00988977989287e-06	0.000140718727929357	0.000883026357379264	1.92735660691388e-06	0.000129458961330672	0.025974025974026	0.0869626646270392	Fabales
Arecales - Fabales	metastat	fASV5873|Trechispora	Fungi	0.00058946508011928	8.25020497481046e-07	0.000127188334762384	0.000253812516880471	5.09227549449446e-07	6.65437123054199e-05	0.025974025974026	0.0869626646270392	Arecales
Arecales - Fabales	metastat	fASV65|Helotiales	Fungi	0.00246393674629936	1.83428116138195e-06	0.000189647824353455	0.00302410837252414	3.15363643504597e-06	0.000165598688165513	0.026973026973027	0.0881181126185872	Fabales
Arecales - Fabales	metastat	fASV79|Hannaella	Fungi	0.00228482509179697	1.85222897861293e-06	0.000190573385515712	0.00297818228228213	6.14289333420947e-06	0.00023112002028326	0.026973026973027	0.0881181126185872	Fabales
Arecales - Fabales	metastat	fASV1990|Cyphellophora	Fungi	0.000824773952446228	1.16042869567704e-06	0.0001508426459487	0.000438438975079795	8.33658948339412e-07	8.51422823656359e-05	0.026973026973027	0.0881181126185872	Arecales
Arecales - Fabales	metastat	fASV3003|Xylariales	Fungi	0.000599021043193477	9.24884146405398e-07	0.000134666191981696	0.00023298323529976	6.27719079509829e-07	7.38811666011463e-05	0.026973026973027	0.0881181126185872	Arecales
Arecales - Fabales	metastat	fASV132|Herpotrichiellaceae	Fungi	0.00125587105320051	1.95093671494207e-06	0.000195585431659148	0.00186569617248841	4.34695282560541e-06	0.000194421165997617	0.027972027972028	0.0897499295189314	Fabales
Arecales - Fabales	metastat	fASV2140|Schizoporaceae	Fungi	0.00123068733132899	1.24396728582948e-06	0.000156177832640939	0.000778219394524534	1.87390132933603e-06	0.000127651064108919	0.027972027972028	0.0897499295189314	Arecales
Arecales - Fabales	metastat	fASV998|Xylariales	Fungi	0.000846938979840424	1.23889065012675e-06	0.000155858825646471	0.00138707151226846	3.14346730594964e-06	0.00016533148010166	0.027972027972028	0.0897499295189314	Fabales
Arecales - Fabales	metastat	fASV5|Apiotrichum	Fungi	0.00327557410471201	1.40464081585623e-06	0.000165957756014881	0.00381387848992842	4.04014115497388e-06	0.000187434421110863	0.028971028971029	0.0907935333505469	Fabales
Arecales - Fabales	metastat	fASV57|Apiotrichum	Fungi	0.00195732695934253	1.83748915227127e-06	0.000189813590304126	0.00143910466556893	2.50308881164718e-06	0.000147533012124396	0.028971028971029	0.0907935333505469	Arecales
Arecales - Fabales	metastat	fASV39|Metarhizium_anisopliae	Fungi	0.00250248685015244	2.80014169620626e-06	0.000234317603140053	0.00187139889003099	3.08374946065732e-06	0.000163753512027584	0.028971028971029	0.0907935333505469	Arecales
Arecales - Fabales	metastat	fASV5305|Meripilaceae	Fungi	0.000534813581597251	8.0552789518426e-07	0.000125676826071699	0.000215113775136827	4.42317418000473e-07	6.20180491260038e-05	0.028971028971029	0.0907935333505469	Arecales
Arecales - Fabales	metastat	fASV87|Knufia	Fungi	0.0017301592452742	1.80815993466185e-06	0.00018829263492213	0.00229895326255607	3.8615383847255e-06	0.000183244630616526	0.02997002997003	0.091271114765015	Fabales
Arecales - Fabales	metastat	fASV473|Pleosporales	Fungi	0.00171696395115661	1.61007962082895e-06	0.000177680017570083	0.00228700401814253	3.31285867061185e-06	0.000169727625037802	0.02997002997003	0.091271114765015	Fabales
Arecales - Fabales	metastat	fASV2385|Xylaria	Fungi	0.000975674197267551	1.28439576457559e-06	0.000158695402195378	0.000553299686373548	1.33689079584104e-06	0.000107819930231565	0.02997002997003	0.091271114765015	Arecales
Arecales - Fabales	metastat	fASV1197|Nectriaceae	Fungi	0.000706398948052564	1.46211302504712e-06	0.000169318879171997	0.000249908378328515	5.67251677001535e-07	7.02326368455166e-05	0.02997002997003	0.091271114765015	Arecales
Arecales - Fabales	metastat	fASV5864|Hypoxylon	Fungi	0.00029960276643002	5.88017903938763e-07	0.000107376733151687	0.000654706506558528	1.54644109830862e-06	0.000115962553862598	0.02997002997003	0.091271114765015	Fabales
Arecales - Fabales	metastat	fASV32|Sordariomycetes	Fungi	0.00167014566414674	1.49913264035022e-06	0.000171448994321711	0.00119438941724364	2.23566617793283e-06	0.000139429464103845	0.030969030969031	0.0921496602547317	Arecales
Arecales - Fabales	metastat	fASV996|Mycosphaerellaceae	Fungi	0.00122641174126633	1.70254073946781e-06	0.000182710568261036	0.00177226074356795	3.34218653560764e-06	0.000170477246616607	0.030969030969031	0.0921496602547317	Fabales
Arecales - Fabales	metastat	fASV292|Eurotiomycetes	Fungi	0.00098063282619916	2.16623045074696e-06	0.000206094897747109	0.000487474840637873	1.2307016016909e-06	0.000103449277707395	0.030969030969031	0.0921496602547317	Arecales
Arecales - Fabales	metastat	fASV714|Sordariomycetes	Fungi	0.000552370111597502	1.17874993330382e-06	0.000152028759747197	0.00100269735803873	2.35090477793233e-06	0.000142977796328276	0.030969030969031	0.0921496602547317	Fabales
Arecales - Fabales	metastat	fASV1158|Lophiostomataceae	Fungi	0.00130961697500794	2.33398166247341e-06	0.000213926030026755	0.000769713648701919	1.68035423823228e-06	0.000120879179285055	0.031968031968032	0.0921496602547317	Arecales
Arecales - Fabales	metastat	fASV503|Strelitziana	Fungi	0.000965289700984891	1.66176619663565e-06	0.000180509420569743	0.0015637282300279	3.80909978749982e-06	0.000181996172618615	0.031968031968032	0.0921496602547317	Fabales
Arecales - Fabales	metastat	fASV1681|Coprinellus	Fungi	0.000613266491552325	1.09443981767711e-06	0.00014649096992026	0.000254056915465969	5.33133528559601e-07	6.80877648818437e-05	0.031968031968032	0.0921496602547317	Arecales
Arecales - Fabales	metastat	fASV542|Plectosphaerellaceae	Fungi	0.000271183963250489	4.7797191299701e-07	9.6809081671396e-05	0.000609913770463347	1.76044868108884e-06	0.000123726510501075	0.031968031968032	0.0921496602547317	Fabales
Arecales - Fabales	metastat	fASV2271|Clavicipitaceae	Fungi	0.000514445239530554	7.54728082082418e-07	0.000121649454765541	0.000188659061934924	3.93897799877919e-07	5.85251933769381e-05	0.031968031968032	0.0921496602547317	Arecales
Arecales - Fabales	metastat	fASV1575|Curvularia	Fungi	0.000533312175669473	1.29269495343132e-06	0.000159207285860925	0.00110034026921081	3.88755918072312e-06	0.000183860986729297	0.031968031968032	0.0921496602547317	Fabales
Arecales - Fabales	metastat	fASV196|Clavicipitaceae	Fungi	0.00115350397619201	2.48676192047636e-06	0.000220816751303879	0.000620331564879594	1.50642918223461e-06	0.000114452541227115	0.032967032967033	0.0925546148163981	Arecales
Arecales - Fabales	metastat	fASV2695|Colletotrichum	Fungi	0.000664576498608612	1.05365037549278e-06	0.000143735212401736	0.00111967641020837	2.31993505835235e-06	0.000142032912852968	0.032967032967033	0.0925546148163981	Fabales
Arecales - Fabales	metastat	fASV519|Hannaella	Fungi	0.000668878676991778	1.03449816441649e-06	0.000142422883462092	0.00114201095473931	3.2021602211818e-06	0.000166867826403227	0.032967032967033	0.0925546148163981	Fabales
Arecales - Fabales	metastat	fASV1345|Acremonium	Fungi	0.00121380986403133	1.59815753227656e-06	0.000177020965429243	0.00073205421830902	1.903743206558e-06	0.000128663470933588	0.032967032967033	0.0925546148163981	Arecales
Arecales - Fabales	metastat	fASV327|Apiotrichum	Fungi	0.00118919406219191	2.2503374190318e-06	0.000210057761385459	0.000625503093177901	2.20669577152994e-06	0.000138523134829057	0.032967032967033	0.0925546148163981	Arecales
Arecales - Fabales	metastat	fASV1240|Xylariaceae	Fungi	0.000816475936161537	1.24418074325394e-06	0.000156191231662077	0.00126219265663291	1.99372809704952e-06	0.000131669153795793	0.034965034965035	0.0956725137003838	Fabales
Arecales - Fabales	metastat	fASV253|Clavicipitaceae	Fungi	0.00100223010272249	2.30785854547884e-06	0.000212725476477836	0.000487914119963058	1.17514060468849e-06	0.00010108716018275	0.034965034965035	0.0956725137003838	Arecales
Arecales - Fabales	metastat	fASV206|Xylariales	Fungi	0.000697259346120579	1.31267698896086e-06	0.000160433052982946	0.00123165711753594	3.82282339259534e-06	0.000182323730063608	0.034965034965035	0.0956725137003838	Fabales
Arecales - Fabales	metastat	fASV756|Xylariales	Fungi	0.000789153402827854	1.38582133418415e-06	0.000164842249854047	0.000364079483531305	1.01937362226715e-06	9.41494474465833e-05	0.034965034965035	0.0956725137003838	Arecales
Arecales - Fabales	metastat	fASV4590|Torula	Fungi	0.000217592805846178	3.11165852275313e-07	7.81107625176234e-05	0.000478488926425782	1.06241533086331e-06	9.61165655931384e-05	0.034965034965035	0.0956725137003838	Fabales
Arecales - Fabales	metastat	fASV1695|Mortierella	Fungi	0.000693977537347442	1.13835515496474e-06	0.000149401102114523	0.000334777040992617	7.27802578002595e-07	7.95532404719492e-05	0.035964035964036	0.096929923880446	Arecales
Arecales - Fabales	metastat	fASV367|Pleosporales	Fungi	0.00107722506326713	2.09528563478143e-06	0.000202691963468061	0.000560028238197151	1.48948428612862e-06	0.000113807017668875	0.035964035964036	0.096929923880446	Arecales
Arecales - Fabales	metastat	fASV963|Pleosporales	Fungi	0.000861145712941853	1.3928970831937e-06	0.000165262541168899	0.000434678556830599	1.24440896624044e-06	0.000104023783494572	0.035964035964036	0.096929923880446	Arecales
Arecales - Fabales	metastat	fASV133|Chaetosphaeriaceae	Fungi	0.00114545378838357	2.9095059120108e-06	0.000238849608602617	0.00058685242751217	1.60215904932077e-06	0.000118033121708191	0.036963036963037	0.0986360611544692	Arecales
Arecales - Fabales	metastat	fASV594|Trichocomaceae	Fungi	0.000975451173815454	2.43405677677199e-06	0.000218464192640619	0.000474109950876478	1.35264797915095e-06	0.000108453475465026	0.036963036963037	0.0986360611544692	Arecales
Arecales - Fabales	metastat	fASV270|Nectriaceae	Fungi	0.00115820083031866	2.07893932956266e-06	0.000201899767869937	0.00176389258177842	4.32339552218988e-06	0.000193893640099969	0.037962037962038	0.100308744756453	Fabales
Arecales - Fabales	metastat	fASV2998|Xylaria	Fungi	0.000401941414232031	6.23144093730162e-07	0.000110537376673087	0.000124709950695964	2.65682026972721e-07	4.80653564994058e-05	0.037962037962038	0.100308744756453	Arecales
Arecales - Fabales	metastat	fASV1281|Ganoderma	Fungi	0.000825626321457948	1.15225511490179e-06	0.000150310470517173	0.000449546086500232	1.05177718122181e-06	9.56341389481995e-05	0.038961038961039	0.101456442064879	Arecales
Arecales - Fabales	metastat	fASV229|Helotiales	Fungi	0.000864246919221846	2.53183451469774e-06	0.000222808918164604	0.000347888817621614	1.13709812452388e-06	9.94374666736263e-05	0.038961038961039	0.101456442064879	Arecales
Arecales - Fabales	metastat	fASV306|Lophiostoma	Fungi	0.000614250079364209	1.25278015387959e-06	0.000156730076063074	0.000245001487466872	5.5877589733973e-07	6.97059599061116e-05	0.038961038961039	0.101456442064879	Arecales
Arecales - Fabales	metastat	fASV2491|Diatrypaceae	Fungi	0.000675295218768733	1.05387897171896e-06	0.000143750803695551	0.000343092042537735	6.43347980320023e-07	7.47952556226153e-05	0.040959040959041	0.105638673022283	Arecales
Arecales - Fabales	metastat	fASV1920|Mycosphaerellaceae	Fungi	0.000634665378808441	1.02356080088763e-06	0.000141667990828019	0.00106645612526418	2.33930338653867e-06	0.000142624572141679	0.040959040959041	0.105638673022283	Fabales
Arecales - Fabales	metastat	fASV1147|Ganoderma	Fungi	0.000834023098442252	1.32483874401119e-06	0.000161174533579996	0.000439066535531352	8.73029393759044e-07	8.71295583928371e-05	0.041958041958042	0.107699915422718	Arecales
Arecales - Fabales	metastat	fASV446|Dictyosporiaceae	Fungi	0.00142465055797162	2.41730945481484e-06	0.000217711333201128	0.000865585720747141	2.19480341041051e-06	0.000138149364989666	0.042957042957043	0.109223970829643	Arecales
Arecales - Fabales	metastat	fASV3001|Hypocreales	Fungi	0.000861790876513968	1.13910429763333e-06	0.000149450253880571	0.000481282727906059	1.46336366178398e-06	0.000112804704719339	0.042957042957043	0.109223970829643	Arecales
Arecales - Fabales	metastat	fASV980|Pleosporales	Fungi	0.00105929551991261	1.72578614970287e-06	0.000183953646639095	0.000611334700776403	1.35943901286664e-06	0.000108725382535708	0.043956043956044	0.110650598037039	Arecales
Arecales - Fabales	metastat	fASV222|Didymellaceae	Fungi	0.00104516713696167	1.64880407391497e-06	0.000179804036788364	0.0015613847997361	3.44008022331297e-06	0.000172955893430339	0.043956043956044	0.110650598037039	Fabales
Arecales - Fabales	metastat	fASV315|Helotiales	Fungi	0.000647168033246248	1.51884607852798e-06	0.000172572580838937	0.00110844607250473	2.6696238691372e-06	0.000152361808210565	0.044955044955045	0.110650598037039	Fabales
Arecales - Fabales	metastat	fASV1033|Bionectriaceae	Fungi	0.00051138180612002	9.73758756578753e-07	0.000138178540130241	0.000193973822368006	4.05890096078108e-07	5.94094192559679e-05	0.044955044955045	0.110650598037039	Arecales
Arecales - Fabales	metastat	fASV1597|Chaetothyriales	Fungi	0.000441952177026082	7.50670536076243e-07	0.000121322010035863	0.000789605911965156	1.81274475586466e-06	0.000125550778082352	0.044955044955045	0.110650598037039	Fabales
Arecales - Fabales	metastat	fASV373|Hypocreales	Fungi	0.000692393420993903	1.17591397238341e-06	0.000151845766201762	0.000328608413666839	7.32817882247709e-07	7.98268714835402e-05	0.044955044955045	0.110650598037039	Arecales
Arecales - Fabales	metastat	fASV3073|Nectriaceae	Fungi	0.000310266507103319	5.48290893585461e-07	0.000103686073486313	0.000609614110827385	1.35050111061801e-06	0.000108367374787883	0.044955044955045	0.110650598037039	Fabales
Arecales - Fabales	metastat	fASV595|Talaromyces	Fungi	0.00117516008242448	1.6508169376288e-06	0.000179913755898066	0.00176055048842658	4.88237807579764e-06	0.000206047231305531	0.045954045954046	0.111080630256615	Fabales
Arecales - Fabales	metastat	fASV458|Pleosporales	Fungi	0.00132373287044192	1.85323326129917e-06	0.000190625043171923	0.000864604730924667	1.83796865749405e-06	0.000126421264635829	0.045954045954046	0.111080630256615	Arecales
Arecales - Fabales	metastat	fASV952|Staphylotrichum	Fungi	0.000976337204524355	1.90789267684165e-06	0.000193415770634735	0.000554275936282634	1.61661523164526e-06	0.000118564428702023	0.045954045954046	0.111080630256615	Arecales
Arecales - Fabales	metastat	fASV2889|Thelephoraceae	Fungi	0.000360981723241668	7.6035666027931e-07	0.000122102228166089	7.34209580571834e-05	1.2373753202984e-07	3.28021118129597e-05	0.045954045954046	0.111080630256615	Arecales
Arecales - Fabales	metastat	fASV1312|Sordariomycetes	Fungi	0.00109996068213938	1.68679747164998e-06	0.000181863850801722	0.000653890531548582	1.51363717459775e-06	0.000114726031866384	0.046953046953047	0.111495507155677	Arecales
Arecales - Fabales	metastat	fASV3031|Psathyrella	Fungi	0.000426839593137496	7.80986603822315e-07	0.000123747577026968	0.000144500282346707	4.1173922220357e-07	5.98359512554095e-05	0.046953046953047	0.111495507155677	Arecales
Arecales - Fabales	metastat	fASV1277|Clavicipitaceae	Fungi	0.000618915928114369	1.30001269451762e-06	0.00015965727352846	0.000247211694278063	7.15298414311626e-07	7.88668891956913e-05	0.046953046953047	0.111495507155677	Arecales
Arecales - Fabales	metastat	fASV1024|Chaetothyriales	Fungi	0.000691572849940997	2.04146377145849e-06	0.00020007174063607	0.000275262220032978	6.31484680571829e-07	7.41024367710483e-05	0.046953046953047	0.111495507155677	Arecales
Arecales - Fabales	metastat	fASV64|Cladosporium	Fungi	0.00190522460923162	2.06068008058614e-06	0.000201011173262082	0.00139210695701045	2.70603429071157e-06	0.000153397304287622	0.047952047952048	0.113368332023913	Arecales
Arecales - Fabales	metastat	fASV2008|Paraphoma	Fungi	0.00052924125613592	9.98237580277436e-07	0.000139904559924946	0.000921894032999504	2.16004585382761e-06	0.000137051112452938	0.048951048951049	0.114723822950286	Fabales
Arecales - Fabales	metastat	fASV324|Alternaria	Fungi	0.000520135601221548	1.34827704612449e-06	0.00016259398766858	0.00100134833977086	3.88973461743522e-06	0.000183912422859483	0.048951048951049	0.114723822950286	Fabales
Arecales - Fabales	metastat	fASV130|Hypocreales	Fungi	0.00142860352829534	2.09580443900181e-06	0.000202717055736092	0.00205884253677629	5.21441468364323e-06	0.000212938339383744	0.04995004995005	0.116558350024586	Fabales
Arecales - Fabales	metastat	pASV2|Trinematidae_X_sp.	Protist	0.00367287001181851	1.11524270941214e-06	0.000147876651659822	0.00519869006293387	6.94572291540559e-06	0.000245759212581633	0.000999000999000999	0.0430218935704634	Fabales
Arecales - Fabales	metastat	pASV14|Colpodida	Protist	0.0035597434723624	1.1038339715679e-06	0.000147118331162627	0.00453516349358013	5.67083151508135e-06	0.000222062104808569	0.000999000999000999	0.0430218935704634	Fabales
Arecales - Fabales	metastat	pASV4|Leidyana1_sp.	Protist	0.00322002256888604	1.71387787345746e-06	0.000183317889195697	0.00462712912607151	8.30881321885549e-06	0.000268794623698426	0.000999000999000999	0.0430218935704634	Fabales
Arecales - Fabales	metastat	pASV27|LKM74-lineage_X_sp.	Protist	0.00338388840717155	1.05045258199619e-06	0.000143516930885891	0.00455383252427004	8.61383303288385e-06	0.000273683934380739	0.000999000999000999	0.0430218935704634	Fabales
Arecales - Fabales	metastat	pASV47|Paracercomonas	Protist	0.00326792985732072	1.17391477192001e-06	0.000151716632919116	0.00417776195596817	4.7097543593115e-06	0.000202371899564004	0.000999000999000999	0.0430218935704634	Fabales
Arecales - Fabales	metastat	pASV49|Hartmannella_vermiformis	Protist	0.00328319542193604	1.08798372860624e-06	0.000146058256481436	0.00462989765132808	8.4074071125767e-06	0.000270384703589995	0.000999000999000999	0.0430218935704634	Fabales
Arecales - Fabales	metastat	pASV34|Amoebogregarina_sp.	Protist	0.00200177349797901	2.79048005501894e-06	0.000233913007753844	0.00316836470169787	7.15099674422247e-06	0.00024936435267404	0.000999000999000999	0.0430218935704634	Fabales
Arecales - Fabales	metastat	pASV194|Protist	Protist	0.00298160241276386	2.46139963375116e-06	0.000219687819226942	0.00193737588553181	5.54928801951847e-06	0.000219669475418401	0.000999000999000999	0.0430218935704634	Arecales
Arecales - Fabales	metastat	pASV933|Archaeplastida	Protist	0.00231596718021495	1.32554189377362e-06	0.000161217299087204	0.00115497828600139	3.00490367905206e-06	0.000161646519322713	0.000999000999000999	0.0430218935704634	Arecales
Arecales - Fabales	metastat	pASV1085|Protist	Protist	0.00188369726131841	1.82456602614349e-06	0.000189144929707846	0.00108695906696399	1.8954311808942e-06	0.000128382281755097	0.000999000999000999	0.0430218935704634	Arecales
Arecales - Fabales	metastat	pASV442|Dimastigella_trypaniformis	Protist	0.00176163384611573	2.15857072346879e-06	0.000205730202319559	0.000784004422938119	1.72784987165377e-06	0.000122575615407965	0.000999000999000999	0.0430218935704634	Arecales
Arecales - Fabales	metastat	pASV309|Labyrinthulaceae	Protist	0.00122459364183781	2.068375212085e-06	0.000201386138320265	0.000470740468099681	1.07417273464085e-06	9.6646947572791e-05	0.000999000999000999	0.0430218935704634	Arecales
Arecales - Fabales	metastat	pASV1372|Protist	Protist	0.000552074336264185	1.17091276387406e-06	0.000151522519123238	0.00128517075875363	2.66580409772016e-06	0.000152252767454541	0.000999000999000999	0.0430218935704634	Fabales
Arecales - Fabales	metastat	pASV77|Watanabea-Clade_XX_sp.	Protist	0.00262186539646529	2.14503602737935e-06	0.0002050842020942	0.00359248855260259	5.91635999622271e-06	0.000226818448682655	0.001998001998002	0.0578570292844162	Fabales
Arecales - Fabales	metastat	pASV156|Cryptodifflugia	Protist	0.0023637740928261	2.21875719858297e-06	0.000208578625725336	0.00353270725368127	6.45179379166841e-06	0.000236859778582519	0.001998001998002	0.0578570292844162	Fabales
Arecales - Fabales	metastat	pASV649|Paulinella	Protist	0.0021200337539759	1.20418589506818e-06	0.000153660301114477	0.00140137925224049	2.15051476503399e-06	0.00013674841275715	0.001998001998002	0.0578570292844162	Arecales
Arecales - Fabales	metastat	pASV461|Filosa-Thecofilosea_XXX_sp.	Protist	0.00193603472180366	2.50585188769316e-06	0.000221662695867125	0.00101875826936451	2.58316202441726e-06	0.000149874208832586	0.001998001998002	0.0578570292844162	Arecales
Arecales - Fabales	metastat	pASV1001|Centramoebida	Protist	0.000712706937767062	1.21671726872594e-06	0.000154457765578709	0.00149631960998683	2.49752266180576e-06	0.000147368885330413	0.001998001998002	0.0578570292844162	Fabales
Arecales - Fabales	metastat	pASV1309|Protaspa_obliqua	Protist	0.0011874156111579	1.78348235524463e-06	0.000187003321520497	0.000427637481428081	8.68976659321478e-07	8.69270888544446e-05	0.001998001998002	0.0578570292844162	Arecales
Arecales - Fabales	metastat	pASV12|Euglypha_rotunda	Protist	0.00380738861810225	2.85659928500815e-06	0.000236668017878281	0.00506559221386246	6.89991205759594e-06	0.000244947413302208	0.002997002997003	0.0578570292844162	Fabales
Arecales - Fabales	metastat	pASV22|Cercomonas_sp.	Protist	0.00378402969609233	2.44835783216049e-06	0.000219105034896217	0.00487624558134531	7.66129571996604e-06	0.000258108432218541	0.002997002997003	0.0578570292844162	Fabales
Arecales - Fabales	metastat	pASV5|Sphaeropleales_X	Protist	0.00384333753287858	2.49723843972958e-06	0.000221281403652771	0.00505850209899614	7.21586649013067e-06	0.000250492844471795	0.002997002997003	0.0578570292844162	Fabales
Arecales - Fabales	metastat	pASV15|Protist	Protist	0.00220822315203166	2.95981272130197e-06	0.000240905673563203	0.00334035854905002	6.43355419861924e-06	0.00023652473349147	0.002997002997003	0.0578570292844162	Fabales
Arecales - Fabales	metastat	pASV346|Dinophyceae	Protist	0.00157593710579144	2.28187590994546e-06	0.000211524620082135	0.00253851772760504	5.92595519127795e-06	0.00022700230206222	0.002997002997003	0.0578570292844162	Fabales
Arecales - Fabales	metastat	pASV137|Cercomonas_sp.	Protist	0.00149304958936362	2.18325379579816e-06	0.000206903112487045	0.000710016277223535	1.66136216695954e-06	0.000120194124393743	0.002997002997003	0.0578570292844162	Arecales
Arecales - Fabales	metastat	pASV794|Protist	Protist	0.00134561938304886	2.0204164475451e-06	0.000199037706918549	0.000577895376678794	1.47433704529863e-06	0.000113226861358211	0.002997002997003	0.0578570292844162	Arecales
Arecales - Fabales	metastat	pASV1216|Naegleria_sp.	Protist	0.00171379293468585	3.89625353564289e-06	0.000276400304178307	0.000647596746018558	1.38644081865378e-06	0.000109799850267332	0.002997002997003	0.0578570292844162	Arecales
Arecales - Fabales	metastat	pASV1093|Protist	Protist	0.000564306480973034	1.14217407874707e-06	0.000149651495720929	0.00118706689534505	2.79687676261999e-06	0.000155950849632323	0.002997002997003	0.0578570292844162	Fabales
Arecales - Fabales	metastat	pASV2397|Archaeplastida	Protist	0.000971682491924265	1.53520633429826e-06	0.000173499524455372	0.000383354927205471	7.58948158421893e-07	8.12376095393546e-05	0.002997002997003	0.0578570292844162	Arecales
Arecales - Fabales	metastat	pASV201|Cercozoa	Protist	0.00282951798268754	1.37550319886939e-06	0.000164227436679208	0.00366563733109946	5.5849730753081e-06	0.000220374642968624	0.003996003996004	0.062142735157336	Fabales
Arecales - Fabales	metastat	pASV60|Colpodida	Protist	0.00293819024167539	1.28839971357943e-06	0.000158942566614326	0.00221569904602157	3.2500730786438e-06	0.000168111585060891	0.003996003996004	0.062142735157336	Arecales
Arecales - Fabales	metastat	pASV255|Variosea_XXX_sp.	Protist	0.00251301597089227	1.57191399824834e-06	0.000175561508033249	0.00179991729782239	3.47635073488561e-06	0.000173865283553366	0.003996003996004	0.062142735157336	Arecales
Arecales - Fabales	metastat	pASV259|Cyrtolophosidida	Protist	0.00226291583038922	1.91407990375712e-06	0.000193729136954258	0.00150540158034978	3.42436832883788e-06	0.000172560470279082	0.003996003996004	0.062142735157336	Arecales
Arecales - Fabales	metastat	pASV1020|Protist	Protist	0.00061420537242118	9.89447138889989e-07	0.000139287200747092	0.00126471896676295	2.22969378237351e-06	0.000139243102471385	0.003996003996004	0.062142735157336	Fabales
Arecales - Fabales	metastat	pASV313|Anurofeca_sp.	Protist	0.00186791966500797	2.5344303567035e-06	0.000222923109785727	0.00102173274605416	3.48451349810945e-06	0.000174069289005456	0.003996003996004	0.062142735157336	Arecales
Arecales - Fabales	metastat	pASV2062|Opisthokonta	Protist	0.000779038541589821	1.49846341024762e-06	0.000171410721645559	0.000204241136747015	4.65590788797598e-07	6.36287321479984e-05	0.003996003996004	0.062142735157336	Arecales
Arecales - Fabales	metastat	pASV25|Acanthamoebidae	Protist	0.00355410574422303	2.19110734962848e-06	0.000207274912153887	0.00463177707271277	6.17289362460935e-06	0.00023168369788608	0.004995004995005	0.0652498719152027	Fabales
Arecales - Fabales	metastat	pASV29|Platyophrya	Protist	0.00350363869354251	2.53714561702276e-06	0.000223042492083809	0.00439967466083812	5.85637041816404e-06	0.000225665593651199	0.004995004995005	0.0652498719152027	Fabales
Arecales - Fabales	metastat	pASV48|Thaumatomonas_sp.	Protist	0.00335606447100496	2.1727726831236e-06	0.000206405876717694	0.00428071225056265	5.54182941373373e-06	0.000219521800714619	0.004995004995005	0.0652498719152027	Fabales
Arecales - Fabales	metastat	pASV306|Copromyxa_protea	Protist	0.00198385976677411	1.83602430100896e-06	0.00018973791526833	0.00129325160958449	2.03479668021372e-06	0.000133018360295756	0.004995004995005	0.0652498719152027	Arecales
Arecales - Fabales	metastat	pASV826|Notosolenus_urceolatus	Protist	0.00142938997707102	2.1774153877034e-06	0.000206626279467868	0.000755951727635116	1.56419988017597e-06	0.000116626489651737	0.004995004995005	0.0652498719152027	Arecales
Arecales - Fabales	metastat	pASV16|Rhogostoma-lineage_X_sp.	Protist	0.00382921957670916	2.77280531425269e-06	0.000233171035190938	0.00486154060072245	6.50860988919371e-06	0.000237900415577862	0.00599400599400599	0.0652498719152027	Fabales
Arecales - Fabales	metastat	pASV569|Protist	Protist	0.00249683028121563	1.52747219122965e-06	0.000173061940131705	0.00175411337871868	3.24483817824656e-06	0.000167976141635251	0.00599400599400599	0.0652498719152027	Arecales
Arecales - Fabales	metastat	pASV377|Glissomonadida_XX_sp.	Protist	0.00135742328176934	1.89047672835481e-06	0.000192530961521029	0.000726402329752007	1.6669628938368e-06	0.00012039655107861	0.00599400599400599	0.0652498719152027	Arecales
Arecales - Fabales	metastat	pASV451|Opisthokonta	Protist	0.00155003887815761	2.3476001072933e-06	0.000214549235964172	0.000815770007910928	2.3806311375612e-06	0.000143878908553753	0.00599400599400599	0.0652498719152027	Arecales
Arecales - Fabales	metastat	pASV248|Rhogostoma-lineage	Protist	0.00140700945950754	2.15717953583707e-06	0.000205663895610264	0.000698603319818382	1.99041047493316e-06	0.000131559557514199	0.00599400599400599	0.0652498719152027	Arecales
Arecales - Fabales	metastat	pASV747|Breviata-lineage_X_sp.	Protist	0.00151976511583795	2.29872809855928e-06	0.000212304262726283	0.000709566247373182	2.36215897492556e-06	0.000143319617727092	0.00599400599400599	0.0652498719152027	Arecales
Arecales - Fabales	metastat	pASV238|Chlorellales_X	Protist	0.0014809996467769	2.57335664844607e-06	0.000224628523342301	0.000738839995119723	2.66853492467665e-06	0.000152330730710935	0.00599400599400599	0.0652498719152027	Arecales
Arecales - Fabales	metastat	pASV104|Leidyana1_sp.	Protist	0.000424737193144694	1.23125433968672e-06	0.000155377739572442	0.00114573614898056	5.38403709914431e-06	0.000216374013933288	0.00599400599400599	0.0652498719152027	Fabales
Arecales - Fabales	metastat	pASV917|Metabolomonas_insania	Protist	0.000949449459322577	1.5219403316113e-06	0.00017274827723163	0.000279123351782935	7.19787152878171e-07	7.91139603400041e-05	0.00599400599400599	0.0652498719152027	Arecales
Arecales - Fabales	metastat	pASV1187|Thaumatomonas	Protist	0.000138627015520343	3.31516337425362e-07	8.06245641332328e-05	0.000633238089491967	1.69399140015639e-06	0.000121368694486511	0.00599400599400599	0.0652498719152027	Fabales
Arecales - Fabales	metastat	pASV1|Sandonidae	Protist	0.00414116050464956	2.94449673281267e-06	0.000240281564118329	0.0052080402220521	7.54697699751655e-06	0.00025617550026286	0.00699300699300699	0.0652498719152027	Fabales
Arecales - Fabales	metastat	pASV10|Oxytrichidae	Protist	0.00329554231344964	2.71622372850295e-06	0.000230779740865994	0.00427578193704924	7.61258522382591e-06	0.000257286597495206	0.00699300699300699	0.0652498719152027	Fabales
Arecales - Fabales	metastat	pASV96|Colpodida_X_sp.	Protist	0.00219395854837079	2.01380093510392e-06	0.000198711582060973	0.00304504177235143	5.12889172222381e-06	0.000211184891633185	0.00699300699300699	0.0652498719152027	Fabales
Arecales - Fabales	metastat	pASV57|Leidyana1_sp.	Protist	0.00205979822788705	2.21625269207809e-06	0.000208460871961109	0.00305493527107436	7.3809521271786e-06	0.000253342046273904	0.00699300699300699	0.0652498719152027	Fabales
Arecales - Fabales	metastat	pASV43|Leidyana1_sp.	Protist	0.000919247746862189	2.25636366294132e-06	0.000210338833227617	0.00190153710274936	6.52030486972931e-06	0.000238114055055634	0.00699300699300699	0.0652498719152027	Fabales
Arecales - Fabales	metastat	pASV475|Stenamoeba_sp.	Protist	0.000680706940514351	1.3509052690534e-06	0.000162752384341644	0.00150151726886646	5.68064036393683e-06	0.000222254072470867	0.00699300699300699	0.0652498719152027	Fabales
Arecales - Fabales	metastat	pASV605|Paracercomonas_sp.	Protist	0.000605670876757816	1.24651248856128e-06	0.000156337523788561	0.0012500593057257	2.56746152716919e-06	0.000149418045798246	0.00699300699300699	0.0652498719152027	Fabales
Arecales - Fabales	metastat	pASV1273|Cyrtolophosidida	Protist	0.00041243146752865	7.59439950480697e-07	0.000122028600832715	0.00096052170851076	2.24660543544903e-06	0.000139770166483006	0.00699300699300699	0.0652498719152027	Fabales
Arecales - Fabales	metastat	pASV1847|Opisthokonta	Protist	0.000961213772260769	1.44999450373917e-06	0.000168615731114269	0.000392141496908106	7.75402764077964e-07	8.21135356144937e-05	0.00699300699300699	0.0652498719152027	Arecales
Arecales - Fabales	metastat	pASV897|Opisthokonta	Protist	0.00186048432024077	2.10666234147266e-06	0.00020324149363444	0.00114525328694232	2.51323338410213e-06	0.000147831672316924	0.00799200799200799	0.069910577052003	Arecales
Arecales - Fabales	metastat	pASV1150|Protist	Protist	0.00162681316840851	2.33406085950149e-06	0.000213929659481596	0.000813166817736757	2.39315401337792e-06	0.000144256836576082	0.00799200799200799	0.069910577052003	Arecales
Arecales - Fabales	metastat	pASV734|Cyrtolophosis_mucicola	Protist	0.000833801684667229	1.7454695236424e-06	0.000184999709784743	0.000247891429613488	6.00615641725121e-07	7.22685596276363e-05	0.00799200799200799	0.069910577052003	Arecales
Arecales - Fabales	metastat	pASV1922|Protist	Protist	0.000618982762819562	1.12514628765723e-06	0.000148531787556899	0.000138412751214526	3.25834343731517e-07	5.32291472729415e-05	0.00799200799200799	0.069910577052003	Arecales
Arecales - Fabales	metastat	pASV107|Acanthamoebidae_X_sp.	Protist	0.00289045207532825	1.26494434117161e-06	0.000157489143178351	0.00354590919406815	4.66380887817399e-06	0.000201382372143663	0.00899100899100899	0.0729501673586118	Fabales
Arecales - Fabales	metastat	pASV677|WIM80-lineage_X_sp.	Protist	0.00206160953699101	1.88067993244156e-06	0.000192031448223194	0.00137325630285844	2.89974054270156e-06	0.000158792742762151	0.00899100899100899	0.0729501673586118	Arecales
Arecales - Fabales	metastat	pASV556|Pseudourostyla_sp.	Protist	0.00187077368205771	2.43203057015723e-06	0.000218373244525632	0.00110112017704134	3.41525673999167e-06	0.000172330742166277	0.00899100899100899	0.0729501673586118	Arecales
Arecales - Fabales	metastat	pASV814|Protist	Protist	0.000560906633242596	9.86788684172348e-07	0.000139099955890969	0.00116372613099041	2.99588871940569e-06	0.000161403860721179	0.00899100899100899	0.0729501673586118	Fabales
Arecales - Fabales	metastat	pASV1521|Protist	Protist	0.00143292992230783	2.34002560582475e-06	0.000214202836153426	0.000783865422190492	1.85320309789701e-06	0.000126944119780833	0.00899100899100899	0.0729501673586118	Arecales
Arecales - Fabales	metastat	pASV1473|Protist	Protist	0.00134319512150993	1.66341833955088e-06	0.00018059913032334	0.00079264653024013	1.99979408794705e-06	0.000131869305785066	0.00999000999000999	0.0798978023451462	Arecales
Arecales - Fabales	metastat	pASV1101|Apusomonas_proboscidea	Protist	0.000766189601839217	1.39727774040173e-06	0.000165522212264624	0.00138324117422623	2.88985372628356e-06	0.000158521805557622	0.010989010989011	0.084275764117483	Fabales
Arecales - Fabales	metastat	pASV699|Paracercomonas	Protist	0.00145633741628053	2.2676673780438e-06	0.000210865042707778	0.000762234749607497	1.55482856026089e-06	0.000116276602762958	0.010989010989011	0.084275764117483	Arecales
Arecales - Fabales	metastat	pASV1701|Protist	Protist	0.00147899793150902	1.85062920800314e-06	0.000190491068598367	0.000860352519586999	1.81089096757307e-06	0.000125486564933846	0.010989010989011	0.084275764117483	Arecales
Arecales - Fabales	metastat	pASV39|Dimastigella_trypaniformis	Protist	0.00320907359884406	1.00824583659496e-06	0.00014060414719255	0.00382951713952866	4.90580489677302e-06	0.000206540971759643	0.011988011988012	0.0860437871409267	Fabales
Arecales - Fabales	metastat	pASV87|Cyrtolophosidida	Protist	0.00284002044242602	1.49674480271555e-06	0.000171312396831484	0.00355170054941993	4.82212427788835e-06	0.00020477186198279	0.011988011988012	0.0860437871409267	Fabales
Arecales - Fabales	metastat	pASV1039|Protist	Protist	0.00151556270678775	2.14897226901194e-06	0.000205272285409153	0.000833936604964844	2.15517272559312e-06	0.000136896429451107	0.011988011988012	0.0860437871409267	Arecales
Arecales - Fabales	metastat	pASV243|Uroleptus_sp.	Protist	0.00117024023386929	2.64914880121878e-06	0.000227912470351108	0.000490458508425564	1.94810327122741e-06	0.0001301538645045	0.011988011988012	0.0860437871409267	Arecales
Arecales - Fabales	metastat	pASV963|Cercozoa	Protist	0.00072555004679811	1.57139705524947e-06	0.000175532637893002	0.000241993814692903	5.21310781602889e-07	6.7328576632285e-05	0.011988011988012	0.0860437871409267	Arecales
Arecales - Fabales	metastat	pASV8|Leidyana1_sp.	Protist	0.00153021011460127	3.34632672750624e-06	0.000256152785577175	0.00243522130901566	8.74172536027269e-06	0.000275708184740326	0.012987012987013	0.0908837501676038	Fabales
Arecales - Fabales	metastat	pASV511|Ciliophora	Protist	0.00117654933136482	1.9529351696182e-06	0.000195685580621317	0.00184884994710992	3.74387231753647e-06	0.000180431182052435	0.012987012987013	0.0908837501676038	Fabales
Arecales - Fabales	metastat	pASV3|Leidyana1_sp.	Protist	0.00308879942151455	5.23845044374775e-06	0.000320491364288165	0.0040789344304648	8.03987393758785e-06	0.000264408674750608	0.014985014985015	0.102308161539516	Fabales
Arecales - Fabales	metastat	pASV269|Protist	Protist	0.000165935856365705	5.03713554372538e-07	9.93817707642898e-05	0.000656023640497622	2.92884225707874e-06	0.000159587573262504	0.014985014985015	0.102308161539516	Fabales
Arecales - Fabales	metastat	pASV399|Protist	Protist	0.00224860223390418	1.92851627946554e-06	0.000194458336656989	0.0029275585987429	4.84733338668793e-06	0.000205306417585116	0.015984015984016	0.104481741528268	Fabales
Arecales - Fabales	metastat	pASV61|Amoebogregarina_sp.	Protist	0.000731281698948852	2.056543991216e-06	0.000200809342373874	0.00155740733019576	7.39958536969419e-06	0.000253661626199227	0.015984015984016	0.104481741528268	Fabales
Arecales - Fabales	metastat	pASV221|Petalomonadida	Protist	0.000823310431358783	1.84408170621502e-06	0.000190153792567347	0.00144806491388042	3.46607815591999e-06	0.000173608208479548	0.015984015984016	0.104481741528268	Fabales
Arecales - Fabales	metastat	pASV52|Acanthamoeba	Protist	0.0032165768224597	1.43997824105182e-06	0.000168032340552657	0.00399287406353487	7.95946136040745e-06	0.000263083080949353	0.016983016983017	0.104481741528268	Fabales
Arecales - Fabales	metastat	pASV365|Sandonidae_Clade_N/F-A_sp.	Protist	0.00204257980096494	2.06112980599036e-06	0.00020103310653069	0.00143076122391787	2.71576371960875e-06	0.000153672823531846	0.016983016983017	0.104481741528268	Arecales
Arecales - Fabales	metastat	pASV593|Filosa-Imbricatea	Protist	0.00170597055986146	2.03268451501609e-06	0.000199641075728324	0.00112876625455297	2.05223685375307e-06	0.000133587191971096	0.016983016983017	0.104481741528268	Arecales
Arecales - Fabales	metastat	pASV718|Acanthamoebidae	Protist	0.000283672842203936	7.76273812289458e-07	0.00012337364038939	0.000744708738229191	2.31152588092521e-06	0.000141775262480884	0.016983016983017	0.104481741528268	Fabales
Arecales - Fabales	metastat	pASV1152|Leptomyxidae	Protist	0.000730724492929845	1.29921617889246e-06	0.000159608355160709	0.000305089872474484	7.80228286741588e-07	8.23686457200368e-05	0.016983016983017	0.104481741528268	Arecales
Arecales - Fabales	metastat	pASV1975|Colpodea_X	Protist	0.000381572858647297	6.43740728327521e-07	0.000112349308952518	0.000831892792690178	2.09650488777342e-06	0.000135020284716728	0.016983016983017	0.104481741528268	Fabales
Arecales - Fabales	metastat	pASV226|Paracercomonas_sp.	Protist	0.0022803490577988	2.08304799502307e-06	0.000202099179448571	0.00309674856986483	7.65869148634733e-06	0.000258064560280147	0.017982017982018	0.104865865578004	Fabales
Arecales - Fabales	metastat	pASV274|Opisthokonta	Protist	0.00127025678704116	2.268341142133e-06	0.000210896366248272	0.000645246528003423	1.95369337615717e-06	0.000130340469745742	0.017982017982018	0.104865865578004	Arecales
Arecales - Fabales	metastat	pASV1227|Protacanthamoeba_bohemica	Protist	0.000821254314321919	2.4883852652982e-06	0.000220888813539807	0.00164465838465117	7.0395626735117e-06	0.000247413800070487	0.017982017982018	0.104865865578004	Fabales
Arecales - Fabales	metastat	pASV671|Trebouxiophyceae	Protist	0.00113214650112981	2.09276707627176e-06	0.000202570107751238	0.000566592552900554	1.74253474861667e-06	0.0001230953942068	0.017982017982018	0.104865865578004	Arecales
Arecales - Fabales	metastat	pASV1428|Pseudodendromonadales_XX_sp.	Protist	0.000710606907683898	1.40371010071763e-06	0.000165902765091639	0.000235461457369464	6.71849046484768e-07	7.64340606117893e-05	0.017982017982018	0.104865865578004	Arecales
Arecales - Fabales	metastat	pASV622|Euglyphidae	Protist	0.00144744302759122	2.24350348947109e-06	0.00020973856226129	0.000848390230658924	1.92454484593739e-06	0.000129364495026142	0.018981018981019	0.109550594968087	Arecales
Arecales - Fabales	metastat	pASV222|Paracercomonas_sp.	Protist	0.00234745205848888	2.4023634871227e-06	0.00021703724660567	0.00164555076233851	4.3897736686497e-06	0.000195376418599533	0.01998001998002	0.112986791195156	Arecales
Arecales - Fabales	metastat	pASV892|Dictyochloris_fragrans	Protist	0.00117767486567542	1.83115752803487e-06	0.000189486278050183	0.000659265353977929	1.33369314433914e-06	0.000107690908111621	0.01998001998002	0.112986791195156	Arecales
Arecales - Fabales	metastat	pASV56|Glissomonadida	Protist	0.00319185367802206	3.42847194985487e-06	0.000259277727915902	0.0040363187543802	6.37455631411769e-06	0.000235437729496758	0.020979020979021	0.115146832791534	Fabales
Arecales - Fabales	metastat	pASV525|Hartmannellidae_X_sp.	Protist	0.00172467985410825	2.10857744974688e-06	0.000203333853249747	0.00108538731600709	4.12037260421104e-06	0.000189286362406644	0.020979020979021	0.115146832791534	Arecales
Arecales - Fabales	metastat	pASV147|Anurofeca_sp.	Protist	0.00158104108364357	3.40576220874608e-06	0.000258417590639422	0.000859260790528565	3.27144571024597e-06	0.000168663434099211	0.020979020979021	0.115146832791534	Arecales
Arecales - Fabales	metastat	pASV578|Protist	Protist	0.00203176134814659	1.60790020178856e-06	0.000177559722169839	0.00148591115546334	2.60129915408045e-06	0.000150399443629881	0.021978021978022	0.117183443439548	Arecales
Arecales - Fabales	metastat	pASV466|Acanthamoeba	Protist	0.00190382360784053	2.63498229863644e-06	0.000227302264795375	0.00126951903447051	2.65617488957893e-06	0.000151977540948853	0.021978021978022	0.117183443439548	Arecales
Arecales - Fabales	metastat	pASV173|Glissomonadida	Protist	0.000627905511258341	1.42184842986661e-06	0.000166971198048576	0.000206749719176863	5.49442987346858e-07	6.91213795244567e-05	0.021978021978022	0.117183443439548	Arecales
Arecales - Fabales	metastat	pASV17|Leidyana1_sp.	Protist	0.00208904335256339	5.06481412745101e-06	0.000315135020158681	0.00117988259721348	4.52917668279781e-06	0.000198454390396905	0.022977022977023	0.120220057734285	Arecales
Arecales - Fabales	metastat	pASV329|Paracercomonas_sp.	Protist	0.000970051765798187	1.42839748168187e-06	0.000167355291994212	0.00149805280042899	2.4665711987657e-06	0.000146452877085629	0.022977022977023	0.120220057734285	Fabales
Arecales - Fabales	metastat	pASV885|Opisthokonta	Protist	0.00211987651717824	1.45576405861861e-06	0.000168950860625944	0.00160206227650861	2.91455439147142e-06	0.000159197836763526	0.023976023976024	0.12314523664206	Arecales
Arecales - Fabales	metastat	pASV797|Breviata-lineage_X_sp.	Protist	0.00143470361110456	1.72918962922762e-06	0.000184134947808565	0.000896058738682685	2.14668495655568e-06	0.000136626592247556	0.023976023976024	0.12314523664206	Arecales
Arecales - Fabales	metastat	pASV187|Leptomyxidae	Protist	0.00247823200169764	2.20319683585273e-06	0.000207845947658107	0.00185218134739296	4.21560331544297e-06	0.000191461275808678	0.024975024975025	0.124840316164291	Arecales
Arecales - Fabales	metastat	pASV11|Leidyana1	Protist	0.00180520126028417	2.62947318156115e-06	0.000227064523159541	0.00255800954858223	7.32777913492626e-06	0.000252427848235047	0.024975024975025	0.124840316164291	Fabales
Arecales - Fabales	metastat	pASV328|Colpodida_X_sp.	Protist	0.000339849791047565	9.86082399101408e-07	0.00013905016721309	0.000811982768877087	2.28981228258184e-06	0.000141107799759211	0.024975024975025	0.124840316164291	Fabales
Arecales - Fabales	metastat	pASV627|Protist	Protist	0.00140693009581835	5.42110968987399e-06	0.000326031085065369	0.000534502720815183	2.45256573577878e-06	0.000146036497397019	0.025974025974026	0.128684955989528	Arecales
Arecales - Fabales	metastat	pASV190|Glissomonadida	Protist	0.00148570044371562	2.11154159860403e-06	0.000203476722116355	0.00095094881311992	2.13172529566729e-06	0.000136149703273473	0.026973026973027	0.131310301245501	Arecales
Arecales - Fabales	metastat	pASV982|Opisthokonta	Protist	0.000947083900925675	1.8741569177983e-06	0.000191698134729554	0.000456317421506964	1.42089276690537e-06	0.000111155698357925	0.026973026973027	0.131310301245501	Arecales
Arecales - Fabales	metastat	pASV332|Pseudoperkinsidae_X_sp.	Protist	0.00140713685991564	1.79986634147347e-06	0.000187860312178056	0.00086897998719889	1.88970403394402e-06	0.000128188178046252	0.027972027972028	0.131596380333182	Arecales
Arecales - Fabales	metastat	pASV1211|Protist	Protist	0.00147983547139413	1.45732224913466e-06	0.000169041255501324	0.000993422491870482	2.07891475131505e-06	0.000134452666677357	0.027972027972028	0.131596380333182	Arecales
Arecales - Fabales	metastat	pASV458|Paulinella_sp.	Protist	0.000732257679388708	1.63482178521418e-06	0.000179040021006049	0.000237989413975342	7.51330556289458e-07	8.0828888308115e-05	0.027972027972028	0.131596380333182	Arecales
Arecales - Fabales	metastat	pASV523|Proleptomonas_faecicola	Protist	0.000772554541844618	1.58909402523831e-06	0.000176518289072894	0.000311441461153892	7.44042046349185e-07	8.04358802887058e-05	0.027972027972028	0.131596380333182	Arecales
Arecales - Fabales	metastat	pASV1060|Protist	Protist	0.00179397925429677	3.84490442891396e-06	0.000274572910025519	0.00109602828522575	2.67929969212866e-06	0.000152637669637685	0.028971028971029	0.134043420463345	Arecales
Arecales - Fabales	metastat	pASV596|Operculariidae_X_sp.	Protist	0.000814817782556315	1.91169173996316e-06	0.000193608243016622	0.000310172993887954	8.43834282222051e-07	8.56603140936719e-05	0.028971028971029	0.134043420463345	Arecales
Arecales - Fabales	metastat	pASV535|Kinetoplastea_XXX_sp.	Protist	0.0013480569851319	1.89068212372636e-06	0.000192541420230657	0.000829485724112377	1.7643886038347e-06	0.000123864884444957	0.02997002997003	0.137529004036727	Arecales
Arecales - Fabales	metastat	pASV6|Protist	Protist	0.0022939646985549	4.52960099588026e-06	0.000298019639959473	0.00315536415120528	8.68550958729847e-06	0.000274820250935652	0.030969030969031	0.138702584871174	Fabales
Arecales - Fabales	metastat	pASV182|Leidyana1_sp.	Protist	0.000606501606522896	1.53972162868705e-06	0.00017375448244674	0.00125757202322805	5.86275544587501e-06	0.000225788578404762	0.030969030969031	0.138702584871174	Fabales
Arecales - Fabales	metastat	pASV1665|Ichthyobodonidae_PRO1_sp.	Protist	0.000927833684350745	1.45553187534748e-06	0.000168937386901443	0.000499937696568697	1.1788013448315e-06	0.000101244488624298	0.030969030969031	0.138702584871174	Arecales
Arecales - Fabales	metastat	pASV789|Colpodida	Protist	0.000552196127028982	1.18129537143844e-06	0.000152192819613575	0.00101656309404137	2.71663142184704e-06	0.000153697371249819	0.031968031968032	0.140922108073329	Fabales
Arecales - Fabales	metastat	pASV1242|Hartmannellidae_X_sp.	Protist	0.000102269046894214	1.79435910206843e-07	5.93156908458995e-05	0.000351881842691733	8.92662127477234e-07	8.81037988361867e-05	0.031968031968032	0.140922108073329	Fabales
Arecales - Fabales	metastat	pASV494|Cercomonadidae	Protist	0.00146502342490199	1.8588495455402e-06	0.000190913672388097	0.000941833914849228	2.1893023323665e-06	0.000137976126869091	0.032967032967033	0.143072808850611	Arecales
Arecales - Fabales	metastat	pASV803|Colpodida	Protist	0.000173416231564638	3.82754019550693e-07	8.66312921264816e-05	0.000485396676951269	1.20253529123485e-06	0.000102258635916158	0.032967032967033	0.143072808850611	Fabales
Arecales - Fabales	metastat	pASV1184|Nolandellidae_X_sp.	Protist	0.00155218493288311	1.84576625486756e-06	0.000190240624456191	0.00104483550017072	2.81867086052534e-06	0.000156557278322895	0.033966033966034	0.146274438139575	Arecales
Arecales - Fabales	metastat	pASV192|Eupetalomonads_XX_sp.	Protist	0.000985862214502995	2.28486133104857e-06	0.000211662945669713	0.00160546006940714	5.07718095219275e-06	0.000210117585138143	0.035964035964036	0.151385309706593	Fabales
Arecales - Fabales	metastat	pASV855|Bursariomorphida_X_sp.	Protist	0.000835500321705431	1.60616539153307e-06	0.000177463909146812	0.000399074046058756	9.98797542422219e-07	9.31943990863333e-05	0.035964035964036	0.151385309706593	Arecales
Arecales - Fabales	metastat	pASV1285|Pellita_digitata	Protist	0.000558369078399569	1.08843992856479e-06	0.000146088874948175	0.000974215261257657	2.08200336060212e-06	0.000134552506660835	0.035964035964036	0.151385309706593	Fabales
Arecales - Fabales	metastat	pASV295|Apocyrtolophosis	Protist	0.00160104291131938	2.16799054539851e-06	0.000206178608340501	0.00221948916297509	5.25433698169335e-06	0.0002137519281722	0.036963036963037	0.152158314760242	Fabales
Arecales - Fabales	metastat	pASV189|Halteria_grandinella	Protist	0.000992357672221947	2.22625720857305e-06	0.000208930854899135	0.000479065719122267	1.20034054578286e-06	0.000102165277253932	0.036963036963037	0.152158314760242	Arecales
Arecales - Fabales	metastat	pASV594|Hypotrichia	Protist	0.00124576062936665	2.46203317550513e-06	0.000219716090225596	0.000726545862497261	1.74593370997218e-06	0.000123215389706918	0.036963036963037	0.152158314760242	Arecales
Arecales - Fabales	metastat	pASV163|Protist	Protist	0.00212367521559049	1.93595179589869e-06	0.000194832849220219	0.001568056579216	3.17147781599594e-06	0.000166066456472046	0.037962037962038	0.154695744966134	Arecales
Arecales - Fabales	metastat	pASV1165|Protist	Protist	0.00115179415949437	1.81730248441583e-06	0.000188768064161736	0.000660140158295998	1.47307532739148e-06	0.000113178401972149	0.038961038961039	0.154695744966134	Arecales
Arecales - Fabales	metastat	pASV869|ATCC50593-lineage_X_sp.	Protist	0.000829396485647181	1.82359398921321e-06	0.00018909453954711	0.000371113890643533	8.86089187983194e-07	8.77788321508489e-05	0.038961038961039	0.154695744966134	Arecales
Arecales - Fabales	metastat	pASV1111|Paracercomonas	Protist	0.000482578786773968	9.13970782474005e-07	0.000133869323352232	0.000960641542534986	3.41206602113518e-06	0.000172250222972915	0.038961038961039	0.154695744966134	Fabales
Arecales - Fabales	metastat	pASV444|Dictyochloropsis	Protist	0.000965135305786415	1.82099634323828e-06	0.000188959812266341	0.000486283611161945	1.37277487794949e-06	0.000109257369782247	0.038961038961039	0.154695744966134	Arecales
Arecales - Fabales	metastat	pASV845|Centroheliozoa_X	Protist	0.00132030855031166	2.01770863327135e-06	0.000198904284463331	0.00081684149465832	2.05233343192275e-06	0.000133590335237597	0.03996003996004	0.156443249347139	Arecales
Arecales - Fabales	metastat	pASV1861|Protist	Protist	0.00106635327544922	1.68341627982909e-06	0.000181681485984649	0.000614131387538147	1.61433546829903e-06	0.000118480798969029	0.03996003996004	0.156443249347139	Arecales
Arecales - Fabales	metastat	pASV772|Choanoflagellida_XX_Clade-2_X_sp.	Protist	0.00115055737807641	2.01152216506025e-06	0.000198599121547938	0.000656038192214736	1.76982388691954e-06	0.000124055523576079	0.041958041958042	0.163124679788007	Arecales
Arecales - Fabales	metastat	pASV479|Centramoebida	Protist	0.00148197465378524	2.05661388750324e-06	0.000200812754824149	0.00202672875359909	3.13431862378355e-06	0.000165090716137036	0.042957042957043	0.164720811684171	Fabales
Arecales - Fabales	metastat	pASV1355|Protist	Protist	0.00142260186534161	2.04746432330291e-06	0.00020036556410833	0.000913239602455242	2.382465187183e-06	0.000143934320383291	0.042957042957043	0.164720811684171	Arecales
Arecales - Fabales	metastat	pASV673|Ripidomyxa_sp.	Protist	0.000764670822174354	1.44854882730641e-06	0.000168531653354729	0.00122620381531113	2.5915789026759e-06	0.000150118182506054	0.043956043956044	0.167404919199354	Fabales
Arecales - Fabales	metastat	pASV631|Filamoeba_sp.	Protist	0.00185974413199702	2.85402932237999e-06	0.000236561533775787	0.00121501801541771	4.56175604970943e-06	0.000199166874531175	0.044955044955045	0.167785384924807	Arecales
Arecales - Fabales	metastat	pASV860|Protist	Protist	0.000814121596098379	1.49738789463534e-06	0.000171349195952692	0.000406834506644249	9.79187237513434e-07	9.22749783557363e-05	0.044955044955045	0.167785384924807	Arecales
Arecales - Fabales	metastat	pASV729|Euglyphidae	Protist	0.000687483909123588	1.59604999166818e-06	0.00017690420536507	0.000269888908582649	6.7532431797658e-07	7.66314907444022e-05	0.044955044955045	0.167785384924807	Arecales
Arecales - Fabales	metastat	pASV573|Sandona_sp.	Protist	0.00109635805153812	1.71754007168006e-06	0.000183513640657724	0.000631304754107428	1.76583012212716e-06	0.00012391547336889	0.046953046953047	0.17069075955554	Arecales
Arecales - Fabales	metastat	pASV1122|WIM80-lineage_X_sp.	Protist	0.00133522786133721	2.372253988646e-06	0.000215672863594607	0.000833076946675236	1.89707305284261e-06	0.000128437873760129	0.046953046953047	0.17069075955554	Arecales
Arecales - Fabales	metastat	pASV810|LKM74-lineage_X_sp.	Protist	0.000672961050313583	1.41495244059108e-06	0.000166565799316024	0.00125159076634553	5.74950259374884e-06	0.000223597125939156	0.046953046953047	0.17069075955554	Fabales
Arecales - Fabales	metastat	pASV2664|Opisthokonta	Protist	0.00112086748698914	2.17208632702701e-06	0.000206373273417179	0.000638147294704135	1.30991773002473e-06	0.000106726702173059	0.046953046953047	0.17069075955554	Arecales
Arecales - Fabales	metastat	pASV664|Paracercomonas_sp.	Protist	0.000987456866338431	2.04538223940346e-06	0.000200263661471447	0.00049643827691038	1.23509135893585e-06	0.00010363360873921	0.047952047952048	0.173197816696575	Arecales
Arecales - Fabales	metastat	pASV920|Cyrtolophosidida	Protist	0.00124233908636902	2.02108162438182e-06	0.00019907046857449	0.000770570518218505	1.66767718734689e-06	0.000120422343273739	0.048951048951049	0.17455379748016	Arecales
Arecales - Fabales	metastat	pASV895|Agitata_tremulans	Protist	0.000936581438477178	1.63462847091011e-06	0.000179029435136506	0.000485147972482566	1.64462647162616e-06	0.000119587205642037	0.048951048951049	0.17455379748016	Arecales
Arecales - Fabales	metastat	pASV240|Rhynosporidae_X_sp.	Protist	0.00113579376082701	2.15096388983733e-06	0.000205367384328257	0.000633308322070168	1.63962380851296e-06	0.000119405185544411	0.04995004995005	0.174776442630007	Arecales
Arecales - Fabales	metastat	pASV1180|Sandonidae	Protist	0.00105972874321054	1.5864486906195e-06	0.000176371304556525	0.000651342484015664	1.27994056701796e-06	0.000105498426405654	0.04995004995005	0.174776442630007	Arecales
Arecales - Fabales	metastat	pASV1056|Protist	Protist	0.00101057674030654	1.98205267476645e-06	0.000197138981271074	0.000552939812407989	1.56434842359466e-06	0.000116632027206888	0.04995004995005	0.174776442630007	Arecales
Arecales - Gentianales	metastat	bASV11|Acinetobacter	Bacteria	0.000514799590074445	3.22866554054721e-07	7.9565801360704e-05	0.00128088871755027	7.31087584579579e-06	0.000310154372551964	0.000999000999000999	0.0548285933961043	Gentianales
Arecales - Gentianales	metastat	bASV1303|Sporichthya	Bacteria	0.000381297678734816	1.48297425187794e-07	5.39239524769935e-05	0.000720137699348129	4.47831479454766e-07	7.67627479088007e-05	0.000999000999000999	0.0548285933961043	Gentianales
Arecales - Gentianales	metastat	bASV83|Bacillus	Bacteria	0.000705507673240442	2.70544772803729e-07	7.28340543066207e-05	0.000342504746935982	2.1500093850344e-07	5.31879659053675e-05	0.000999000999000999	0.0548285933961043	Arecales
Arecales - Gentianales	metastat	bASV373|Dongia	Bacteria	0.000754239938650984	2.74873732707563e-07	7.34144470351826e-05	0.00043851981773466	2.66617706116373e-07	5.92294497024709e-05	0.000999000999000999	0.0548285933961043	Arecales
Arecales - Gentianales	metastat	bASV53|Lactococcus_lactis	Bacteria	0.00036737858664785	1.72409682930259e-07	5.81427727085694e-05	0.000784437149959971	1.03430613345886e-06	0.000116658866914272	0.000999000999000999	0.0548285933961043	Gentianales
Arecales - Gentianales	metastat	bASV1749|uncultured_Planctomycetaceae	Bacteria	0.000765072062186183	2.09811575523862e-07	6.41401002591374e-05	0.000446869514933883	3.4320540974162e-07	6.72001536791026e-05	0.000999000999000999	0.0548285933961043	Arecales
Arecales - Gentianales	metastat	bASV497|Gaiellales	Bacteria	0.000618000292672689	2.66252639441519e-07	7.22539963534848e-05	0.000286222038845799	1.73500785007529e-07	4.77797558165437e-05	0.000999000999000999	0.0548285933961043	Arecales
Arecales - Gentianales	metastat	bASV1068|Devosia	Bacteria	0.000243328324934361	1.70096121359615e-07	5.77513468749846e-05	0.000571068337801735	3.37309248631241e-07	6.66204141930473e-05	0.000999000999000999	0.0548285933961043	Gentianales
Arecales - Gentianales	metastat	bASV808|Anaeromyxobacter	Bacteria	0.000635212756606803	2.41767089747867e-07	6.8851515390199e-05	0.000308554555176736	1.89936523393893e-07	4.99916471172794e-05	0.000999000999000999	0.0548285933961043	Arecales
Arecales - Gentianales	metastat	bASV1511|Paenibacillus_curdlanolyticus	Bacteria	0.000619698818803005	2.13753386957278e-07	6.47398090939049e-05	0.000348292392344938	2.22654549303831e-07	5.41263810208924e-05	0.000999000999000999	0.0548285933961043	Arecales
Arecales - Gentianales	metastat	bASV787|uncultured_Rubrobacterales	Bacteria	0.000591428446274098	1.97696645802264e-07	6.22607807504229e-05	0.000282955476810514	1.841450323916e-07	4.92235812646851e-05	0.000999000999000999	0.0548285933961043	Arecales
Arecales - Gentianales	metastat	bASV556|Arthrobacter	Bacteria	0.000613530770951011	2.55962231087207e-07	7.08439642892727e-05	0.000268581122634158	1.53641490051926e-07	4.49621902637629e-05	0.000999000999000999	0.0548285933961043	Arecales
Arecales - Gentianales	metastat	bASV1370|metagenome	Bacteria	0.000187176056280912	1.09140038853208e-07	4.62601422590507e-05	0.000534277696163278	5.1807106572285e-07	8.25634577097209e-05	0.000999000999000999	0.0548285933961043	Gentianales
Arecales - Gentianales	metastat	bASV2346|uncultured_Nannocystineae	Bacteria	0.000534851861020881	2.72149660069145e-07	7.30497627955974e-05	0.000222297191466112	1.31379318708852e-07	4.15773405374744e-05	0.000999000999000999	0.0548285933961043	Arecales
Arecales - Gentianales	metastat	bASV523|uncultured_beta	Bacteria	0.000730422319008172	3.27808559711383e-07	8.01724317821921e-05	0.000367770746131582	2.69259764206951e-07	5.95221944681309e-05	0.000999000999000999	0.0548285933961043	Arecales
Arecales - Gentianales	metastat	bASV503|Allorhizobium-Neorhizobium-Pararhizobium-Rhizobium	Bacteria	0.000483929449743456	2.57420897251972e-07	7.104553873093e-05	0.000225390186116008	1.44090445344231e-07	4.35422428501805e-05	0.000999000999000999	0.0548285933961043	Arecales
Arecales - Gentianales	metastat	bASV2393|uncultured_delta	Bacteria	0.000566644013546689	1.7329709955e-07	5.82922151244713e-05	0.000299286081304651	1.88128516467259e-07	4.97531427818833e-05	0.000999000999000999	0.0548285933961043	Arecales
Arecales - Gentianales	metastat	bASV2011|ADurb.Bin063-1	Bacteria	0.000523521718020066	2.87909587947295e-07	7.51351185410808e-05	0.000179926762866515	1.11984552001358e-07	3.8385947264413e-05	0.000999000999000999	0.0548285933961043	Arecales
Arecales - Gentianales	metastat	bASV3638|Sandaracinaceae	Bacteria	0.000536836230319473	2.28613426110638e-07	6.69523427390544e-05	0.000214595384843208	1.30990748153399e-07	4.15158099487727e-05	0.000999000999000999	0.0548285933961043	Arecales
Arecales - Gentianales	metastat	bASV1387|Hyphomicrobium	Bacteria	0.000145232099490535	9.62319282749694e-08	4.34384686011278e-05	0.000428963421822451	3.78580636042421e-07	7.0578496430945e-05	0.000999000999000999	0.0548285933961043	Gentianales
Arecales - Gentianales	metastat	bASV3621|uncultured_bacterium	Bacteria	0.000483810202635334	2.57756557505786e-07	7.10918430424495e-05	0.000163565182260126	9.73503732608157e-08	3.57900260401987e-05	0.000999000999000999	0.0548285933961043	Arecales
Arecales - Gentianales	metastat	bASV2943|Micromonosporaceae	Bacteria	0.000487376104155242	1.96069050844155e-07	6.20039611075183e-05	0.000198725821657099	1.33947321106715e-07	4.19817192526003e-05	0.000999000999000999	0.0548285933961043	Arecales
Arecales - Gentianales	metastat	bASV1917|Rhizobacter	Bacteria	0.000356143799698626	1.56233846301845e-07	5.53480690811935e-05	0.000125638983557281	8.17303686035422e-08	3.27932856982754e-05	0.000999000999000999	0.0548285933961043	Arecales
Arecales - Gentianales	metastat	bASV1730|Ellin6067	Bacteria	0.000374443983192968	1.71081375551333e-07	5.79183630251783e-05	0.000130537764431098	8.68393134768135e-08	3.38027002730188e-05	0.000999000999000999	0.0548285933961043	Arecales
Arecales - Gentianales	metastat	bASV2486|Pseudonocardia	Bacteria	0.000425706405644422	1.82293043952114e-07	5.97860636839871e-05	0.00014834174754273	9.75375754045945e-08	3.58244211406193e-05	0.000999000999000999	0.0548285933961043	Arecales
Arecales - Gentianales	metastat	bASV4518|Haliangium	Bacteria	0.00037164424284366	2.30093851264127e-07	6.71687735665455e-05	0.000143084341309048	1.07711999440667e-07	3.7646555626446e-05	0.000999000999000999	0.0548285933961043	Arecales
Arecales - Gentianales	metastat	bASV1289|Pseudarthrobacter_defluvii	Bacteria	0.000440263647252295	2.89138265928842e-07	7.52952705241878e-05	0.000120249363305668	8.48675704631095e-08	3.3416740695722e-05	0.000999000999000999	0.0548285933961043	Arecales
Arecales - Gentianales	metastat	bASV1509|Chitinophagaceae	Bacteria	9.60373436963136e-05	7.73626472317789e-08	3.89475885210305e-05	0.00031517366348687	1.86426180730506e-07	4.9527528327623e-05	0.000999000999000999	0.0548285933961043	Gentianales
Arecales - Gentianales	metastat	bASV3683|Xanthobacteraceae	Bacteria	0.000439761047365181	2.20947973725047e-07	6.58203100136656e-05	0.000142048987587285	8.89909615854991e-08	3.42189085897309e-05	0.000999000999000999	0.0548285933961043	Arecales
Arecales - Gentianales	metastat	bASV5331|uncultured_soil	Bacteria	0.000292718632024737	1.1229613483349e-07	4.69242474285427e-05	8.542375633263e-05	5.83548613863198e-08	2.77096936739512e-05	0.000999000999000999	0.0548285933961043	Arecales
Arecales - Gentianales	metastat	bASV6312|uncultured_bacterium	Bacteria	0.000370001391727538	1.72497832835282e-07	5.81576344751971e-05	9.93389187709927e-05	6.98821243628409e-08	3.03232853819168e-05	0.000999000999000999	0.0548285933961043	Arecales
Arecales - Gentianales	metastat	bASV2250|Terribacillus_goriensis	Bacteria	0.000453948121925446	2.67342255589035e-07	7.24016920489411e-05	0.000165523226551542	1.0365969661074e-07	3.69316040330921e-05	0.000999000999000999	0.0548285933961043	Arecales
Arecales - Gentianales	metastat	bASV1576|Lachnospiraceae	Bacteria	8.57169895353958e-05	4.90255514500204e-08	3.10046016350705e-05	0.000308953345523109	2.38445663137752e-07	5.60128818757172e-05	0.000999000999000999	0.0548285933961043	Gentianales
Arecales - Gentianales	metastat	bASV1513|Cupriavidus	Bacteria	9.38360486298729e-05	6.14785170822926e-08	3.47197511405344e-05	0.000358380455444763	3.18614864965104e-07	6.47479795422529e-05	0.000999000999000999	0.0548285933961043	Gentianales
Arecales - Gentianales	metastat	bASV201|Variovorax_soli	Bacteria	0.000825709309938395	2.88984698963906e-07	7.52752724761e-05	0.000544167733423122	3.20211901162506e-07	6.49100492141267e-05	0.001998001998002	0.0716989298256749	Arecales
Arecales - Gentianales	metastat	bASV17|Bacillus_mycoides	Bacteria	0.000426668449617181	2.66334023864383e-07	7.22650383106986e-05	0.00113141568309508	5.8859072188554e-06	0.000278291479597415	0.001998001998002	0.0716989298256749	Gentianales
Arecales - Gentianales	metastat	bASV813|Xanthomonadaceae	Bacteria	0.000619096365715584	2.44959920268738e-07	6.93046585125696e-05	0.000317555835479814	1.93161186171148e-07	5.04142296865034e-05	0.001998001998002	0.0716989298256749	Arecales
Arecales - Gentianales	metastat	bASV719|uncultured_bacterium	Bacteria	0.000550452312037221	2.69904844684302e-07	7.27478649621757e-05	0.000247716005288304	1.74750109259606e-07	4.79514707062207e-05	0.001998001998002	0.0716989298256749	Arecales
Arecales - Gentianales	metastat	bASV645|Bradyrhizobium	Bacteria	0.000522860369627425	2.34818455939544e-07	6.78548704942761e-05	0.000238069091083457	2.64082655886478e-07	5.89471949118869e-05	0.001998001998002	0.0716989298256749	Arecales
Arecales - Gentianales	metastat	bASV1492|mle1-7	Bacteria	0.000577910294968497	3.69505351601297e-07	8.51187580535245e-05	0.000233260427680729	1.6651079176872e-07	4.6807386923872e-05	0.001998001998002	0.0716989298256749	Arecales
Arecales - Gentianales	metastat	bASV1528|Gaiellales	Bacteria	0.000584953541665865	2.69591848254576e-07	7.270567152333e-05	0.00022891510902993	2.34495273475205e-07	5.55469542339969e-05	0.001998001998002	0.0716989298256749	Arecales
Arecales - Gentianales	metastat	bASV1248|Allorhizobium-Neorhizobium-Pararhizobium-Rhizobium	Bacteria	0.000459626006922364	2.17128981314463e-07	6.52489923766332e-05	0.000184210118790907	1.1729708013942e-07	3.92859088403643e-05	0.001998001998002	0.0716989298256749	Arecales
Arecales - Gentianales	metastat	bASV2115|Bacillus	Bacteria	0.000395828525813072	1.68182132954994e-07	5.74255072373807e-05	0.000178701485474227	1.11879394081887e-07	3.83679200706938e-05	0.001998001998002	0.0716989298256749	Arecales
Arecales - Gentianales	metastat	bASV988|ADurb.Bin063-1	Bacteria	0.000400563831353704	2.09732875171916e-07	6.41280696504768e-05	0.000162738166667344	1.28839325744477e-07	4.11734658015517e-05	0.001998001998002	0.0716989298256749	Arecales
Arecales - Gentianales	metastat	bASV1493|MB-A2-108	Bacteria	0.000485024172592835	2.86805993384825e-07	7.49909789849033e-05	0.000190710074568098	1.53238474960634e-07	4.49031816597247e-05	0.001998001998002	0.0716989298256749	Arecales
Arecales - Gentianales	metastat	bASV1928|Micromonosporaceae	Bacteria	0.000490977012262909	2.0423357766437e-07	6.3281750562096e-05	0.000226694616400056	1.39238214395692e-07	4.28028243035944e-05	0.001998001998002	0.0716989298256749	Arecales
Arecales - Gentianales	metastat	bASV3106|Empedobacter_brevis	Bacteria	7.95787388416623e-05	5.78966183250493e-08	3.36931418881511e-05	0.000306499277888848	2.48812557843437e-07	5.72175623852361e-05	0.001998001998002	0.0716989298256749	Gentianales
Arecales - Gentianales	metastat	bASV1522|67-14	Bacteria	0.000329773834742021	2.02452291454449e-07	6.30051805299901e-05	0.000101321864593352	7.11571367584882e-08	3.05986619845258e-05	0.001998001998002	0.0716989298256749	Arecales
Arecales - Gentianales	metastat	bASV5094|Azorhizobium	Bacteria	0.000127481976129721	7.40006865107294e-08	3.80919132251395e-05	0.000333284640771649	1.87891632848124e-07	4.97218093692194e-05	0.001998001998002	0.0716989298256749	Gentianales
Arecales - Gentianales	metastat	bASV4122|Rhizobiales	Bacteria	5.54249530663515e-05	2.91410834855764e-08	2.39038447500571e-05	0.000229869980321753	1.73622049690895e-07	4.7796450222036e-05	0.001998001998002	0.0716989298256749	Gentianales
Arecales - Gentianales	metastat	bASV2427|Lechevalieria	Bacteria	0.000393282465564386	2.49276368076807e-07	6.99126020333577e-05	9.33124996705777e-05	6.79654173234119e-08	2.99045449202458e-05	0.001998001998002	0.0716989298256749	Arecales
Arecales - Gentianales	metastat	bASV3251|Xanthobacteraceae	Bacteria	2.10878306080786e-05	1.11839903886949e-08	1.48085762040142e-05	0.000180220837027796	1.25747641185543e-07	4.06764578856808e-05	0.001998001998002	0.0716989298256749	Gentianales
Arecales - Gentianales	metastat	bASV801|Bacillus	Bacteria	0.000725626704048852	2.00762231612492e-07	6.27416476141883e-05	0.000480484491044084	1.99840637547875e-07	5.12784757281099e-05	0.002997002997003	0.0755745476540897	Arecales
Arecales - Gentianales	metastat	bASV678|Kitasatospora	Bacteria	0.000758466441302863	2.30248508767166e-07	6.71913435086207e-05	0.000464576836748626	3.11496864271e-07	6.40206447244497e-05	0.002997002997003	0.0755745476540897	Arecales
Arecales - Gentianales	metastat	bASV491|Comamonadaceae	Bacteria	0.000728291137754797	1.94835912765138e-07	6.18086726520049e-05	0.000427319950747079	3.11487475270049e-07	6.40196798761757e-05	0.002997002997003	0.0755745476540897	Arecales
Arecales - Gentianales	metastat	bASV973|Candidatus_Solibacter	Bacteria	0.000696565595995053	2.72939465933364e-07	7.31556849054639e-05	0.000408784383520363	2.94159148792386e-07	6.2213464102952e-05	0.002997002997003	0.0755745476540897	Arecales
Arecales - Gentianales	metastat	bASV920|Kribbella	Bacteria	0.000740977712011291	2.34318723123501e-07	6.77826288006557e-05	0.000448397244711142	2.66832394201191e-07	5.92532915143017e-05	0.002997002997003	0.0755745476540897	Arecales
Arecales - Gentianales	metastat	bASV272|Sphingomonas	Bacteria	0.0006218640625194	1.74384920226563e-07	5.84748848763737e-05	0.000374468598623713	2.09017433687039e-07	5.24426295166341e-05	0.002997002997003	0.0755745476540897	Arecales
Arecales - Gentianales	metastat	bASV149|Rhodoplanes	Bacteria	0.000245872590946225	2.10844061630788e-07	6.42977238079094e-05	0.000582455430688632	7.8083575587254e-07	0.000101361504934237	0.002997002997003	0.0755745476540897	Gentianales
Arecales - Gentianales	metastat	bASV1768|TRA3-20	Bacteria	0.000450730996019823	1.36630880039228e-07	5.17594132841001e-05	0.000251341400995281	1.38156212503074e-07	4.26361923881137e-05	0.002997002997003	0.0755745476540897	Arecales
Arecales - Gentianales	metastat	bASV854|uncultured_Truepera	Bacteria	0.000702833378987509	3.83087096346414e-07	8.66689776855995e-05	0.000355553057475055	5.31859049514991e-07	8.36549184947015e-05	0.002997002997003	0.0755745476540897	Arecales
Arecales - Gentianales	metastat	bASV783|SC-I-84	Bacteria	0.000569242841649742	3.62532658904397e-07	8.43118230613558e-05	0.000238136142937234	1.48121000922203e-07	4.41470331783467e-05	0.002997002997003	0.0755745476540897	Arecales
Arecales - Gentianales	metastat	bASV1107|Geobacteraceae	Bacteria	0.00052375738134017	3.39548439435982e-07	8.15954198344516e-05	0.000234109612011526	1.47495425009134e-07	4.4053708997495e-05	0.002997002997003	0.0755745476540897	Arecales
Arecales - Gentianales	metastat	bASV610|Gammaproteobacteria	Bacteria	0.000380772135110482	1.66702938975157e-07	5.71724153586697e-05	0.000168553001948613	1.36819721275878e-07	4.24294648855259e-05	0.002997002997003	0.0755745476540897	Arecales
Arecales - Gentianales	metastat	bASV793|Variovorax	Bacteria	0.000114413615526667	7.44311308362214e-08	3.82025383707042e-05	0.000316999947203971	2.34083267942886e-07	5.54981350970328e-05	0.002997002997003	0.0755745476540897	Gentianales
Arecales - Gentianales	metastat	bASV3074|uncultured_bacterium	Bacteria	0.000402554329394518	1.51732594417352e-07	5.45449256131508e-05	0.000181632029902526	1.16291705252453e-07	3.9117183135799e-05	0.002997002997003	0.0755745476540897	Arecales
Arecales - Gentianales	metastat	bASV2428|MND1	Bacteria	0.000430935061408842	2.00525085894302e-07	6.2704580608597e-05	0.000175434633859875	1.05479207459616e-07	3.72543193291619e-05	0.002997002997003	0.0755745476540897	Arecales
Arecales - Gentianales	metastat	bASV1937|uncultured_bacterium	Bacteria	0.000422910198471238	2.63339866949754e-07	7.18576843694281e-05	0.000186351190079038	1.24089384688328e-07	4.04073639537217e-05	0.002997002997003	0.0755745476540897	Arecales
Arecales - Gentianales	metastat	bASV3008|Rhodocyclaceae	Bacteria	0.000473251396337748	2.44126876990144e-07	6.91867148346463e-05	0.000195663691850354	1.26176068551167e-07	4.07456921441375e-05	0.002997002997003	0.0755745476540897	Arecales
Arecales - Gentianales	metastat	bASV3457|uncultured_soil	Bacteria	0.000309826470661466	1.29099885444296e-07	5.03127250586702e-05	0.000118881997538559	8.35178769718601e-08	3.31499537532146e-05	0.002997002997003	0.0755745476540897	Arecales
Arecales - Gentianales	metastat	bASV1622|uncultured_Desulfuromonadales	Bacteria	0.000392764360588606	2.84301948826582e-07	7.46628958466486e-05	0.000127231253583283	1.18960062603396e-07	3.95634172136791e-05	0.002997002997003	0.0755745476540897	Arecales
Arecales - Gentianales	metastat	bASV2136|Gemmatimonadaceae	Bacteria	9.4124366282145e-05	5.89837306817204e-08	3.40079952196136e-05	0.000265226142792159	1.79281307523271e-07	4.85691730697015e-05	0.002997002997003	0.0755745476540897	Gentianales
Arecales - Gentianales	metastat	bASV2357|Hyphomicrobium	Bacteria	6.17856884703316e-05	4.05841492082374e-08	2.82093536177997e-05	0.000237806423866867	1.74606586095793e-07	4.79317752665996e-05	0.002997002997003	0.0755745476540897	Gentianales
Arecales - Gentianales	metastat	bASV4005|uncultured_Kofleriaceae	Bacteria	0.000314907886480272	1.78740075309136e-07	5.9200568907762e-05	9.95579041873037e-05	9.44380009143096e-08	3.52506067350377e-05	0.002997002997003	0.0755745476540897	Arecales
Arecales - Gentianales	metastat	bASV73|Methyloligellaceae	Bacteria	0.000925313780529613	1.83074677949426e-07	5.99141015758043e-05	0.00130880898267716	1.2708849799424e-06	0.000129314232738379	0.003996003996004	0.0810509641507629	Gentianales
Arecales - Gentianales	metastat	bASV1905|uncultured_bacterium	Bacteria	0.000552639139260868	2.2775265195214e-07	6.68261795524133e-05	0.000297200768653616	1.55815296503015e-07	4.52791482889919e-05	0.003996003996004	0.0810509641507629	Arecales
Arecales - Gentianales	metastat	bASV772|mle1-7	Bacteria	0.000703158353770903	8.56867920234832e-07	0.000129619951277997	0.000316185151673541	3.05212813949901e-07	6.33715873107828e-05	0.003996003996004	0.0810509641507629	Arecales
Arecales - Gentianales	metastat	bASV1267|Nocardioidaceae	Bacteria	0.000496043802641349	1.53903522308828e-07	5.49337430337904e-05	0.00026759304113511	1.60719424295131e-07	4.59861856109114e-05	0.003996003996004	0.0810509641507629	Arecales
Arecales - Gentianales	metastat	bASV903|A21b	Bacteria	0.000789337605817309	9.20169870940762e-07	0.000134322546465716	0.000338215224599692	3.8904181394605e-07	7.15469862127835e-05	0.003996003996004	0.0810509641507629	Arecales
Arecales - Gentianales	metastat	bASV239|Xanthobacteraceae	Bacteria	0.000246861886895321	1.3636623331983e-07	5.17092613769868e-05	0.000544500058615673	7.01417285765488e-07	9.60685943100231e-05	0.003996003996004	0.0810509641507629	Gentianales
Arecales - Gentianales	metastat	bASV4060|uncultured_bacterium	Bacteria	0.000452624699265705	1.71247177965918e-07	5.79464218330459e-05	0.00025189104946159	1.32654402399359e-07	4.17786149022376e-05	0.003996003996004	0.0810509641507629	Arecales
Arecales - Gentianales	metastat	bASV2430|NB1-j	Bacteria	0.000521993383841869	2.20013792973077e-07	6.56810165926851e-05	0.000265620729988325	2.52118863757672e-07	5.75964709899459e-05	0.003996003996004	0.0810509641507629	Arecales
Arecales - Gentianales	metastat	bASV681|Pseudarthrobacter	Bacteria	0.000365456023538764	1.88510572280284e-07	6.0797086533698e-05	0.000144782962229348	1.21390316492087e-07	3.99654977008272e-05	0.003996003996004	0.0810509641507629	Arecales
Arecales - Gentianales	metastat	bASV674|Bacillus	Bacteria	0.000481889303750935	2.50497781785443e-07	7.00836729308565e-05	0.000208295286835904	1.71955680363273e-07	4.75665296361004e-05	0.003996003996004	0.0810509641507629	Arecales
Arecales - Gentianales	metastat	bASV2854|metagenome	Bacteria	0.000201405529504354	1.18733217048121e-07	4.82504123822916e-05	0.000414546290153472	2.31479231000531e-07	5.5188579935256e-05	0.003996003996004	0.0810509641507629	Gentianales
Arecales - Gentianales	metastat	bASV3484|Pedosphaeraceae	Bacteria	0.00036596748156752	1.46850826620199e-07	5.36603016479135e-05	0.000174159465287208	1.02797532180077e-07	3.67776985091862e-05	0.003996003996004	0.0810509641507629	Arecales
Arecales - Gentianales	metastat	bASV1794|Gaiellales	Bacteria	0.000125107820814319	8.07543849585205e-08	3.97922016595233e-05	0.000617986206221339	5.31979614429899e-06	0.000264570061964963	0.003996003996004	0.0810509641507629	Gentianales
Arecales - Gentianales	metastat	bASV4002|Clostridium_sensu_stricto_8	Bacteria	0.000442275385364989	2.33164747922321e-07	6.76155145096039e-05	0.000190836483442305	1.20044606674583e-07	3.97433553987301e-05	0.003996003996004	0.0810509641507629	Arecales
Arecales - Gentianales	metastat	bASV2989|MND1	Bacteria	0.000362247398104095	1.88262846669283e-07	6.07571260517182e-05	0.000148181267070442	1.06470264007905e-07	3.74289263327149e-05	0.003996003996004	0.0810509641507629	Arecales
Arecales - Gentianales	metastat	bASV3352|uncultured_bacterium	Bacteria	0.0004625193940774	2.41195869582207e-07	6.87701299702255e-05	0.000197599647529301	1.30818674493075e-07	4.14885327360838e-05	0.003996003996004	0.0810509641507629	Arecales
Arecales - Gentianales	metastat	bASV5726|Abditibacterium	Bacteria	0.000337745060961544	2.17617556432056e-07	6.53223614884863e-05	0.000117909550323113	7.1531934540028e-08	3.06791405518533e-05	0.003996003996004	0.0810509641507629	Arecales
Arecales - Gentianales	metastat	bASV3468|uncultured_bacterium	Bacteria	7.29741401889111e-05	4.79567475634477e-08	3.06647743118552e-05	0.000297801624167428	3.28395453959297e-07	6.5734259068266e-05	0.003996003996004	0.0810509641507629	Gentianales
Arecales - Gentianales	metastat	bASV229|Rhodoplanes	Bacteria	0.00082565061936243	2.11816465982352e-07	6.44458225090629e-05	0.00118243148963485	7.97463265474574e-07	0.000102435041385323	0.004995004995005	0.0904937949256091	Gentianales
Arecales - Gentianales	metastat	bASV585|uncultured_bacterium	Bacteria	0.000604389668555473	3.27252430752542e-07	8.01043964366577e-05	0.000326623682283557	2.36689237287371e-07	5.5806200995684e-05	0.004995004995005	0.0904937949256091	Arecales
Arecales - Gentianales	metastat	bASV686|Gaiellales	Bacteria	0.000267845207314783	2.02812932895275e-07	6.3061273174724e-05	0.000620585336029323	8.18192968262768e-07	0.00010375787657246	0.004995004995005	0.0904937949256091	Gentianales
Arecales - Gentianales	metastat	bASV1224|TK10	Bacteria	0.000588600665000232	2.33791006026824e-07	6.77062580052611e-05	0.000330490729874774	1.93122113410296e-07	5.04091305182817e-05	0.004995004995005	0.0904937949256091	Arecales
Arecales - Gentianales	metastat	bASV1552|Ramlibacter	Bacteria	0.000439164582190153	1.98588606553807e-07	6.24010756810576e-05	0.000223961342004365	1.29934544241998e-07	4.13480961570876e-05	0.004995004995005	0.0904937949256091	Arecales
Arecales - Gentianales	metastat	bASV2217|Hyphomicrobium	Bacteria	0.000208874960043254	9.47569569760412e-08	4.3104286892951e-05	0.000460259866143603	3.51605301576546e-07	6.80175385254407e-05	0.004995004995005	0.0904937949256091	Gentianales
Arecales - Gentianales	metastat	bASV3167|Mesorhizobium	Bacteria	0.000365413067608542	1.46091245528983e-07	5.35213436495991e-05	0.00017265082125374	1.19600938495795e-07	3.96698444558986e-05	0.004995004995005	0.0904937949256091	Arecales
Arecales - Gentianales	metastat	bASV3750|uncultured_Acidimicrobiales	Bacteria	0.00011166958510835	9.34733679337764e-08	4.28113435429957e-05	0.000335882559556279	3.78912181200223e-07	7.06093945218324e-05	0.004995004995005	0.0904937949256091	Gentianales
Arecales - Gentianales	metastat	bASV3627|uncultured_bacterium	Bacteria	0.000423617641276752	1.87661939425058e-07	6.06600846609991e-05	0.000179498232300752	1.19807336055954e-07	3.97040591945674e-05	0.004995004995005	0.0904937949256091	Arecales
Arecales - Gentianales	metastat	bASV3272|Afipia	Bacteria	3.88337692481739e-05	2.72529415743255e-08	2.31164747186535e-05	0.00019817619520732	1.69012369558621e-07	4.71576819603826e-05	0.004995004995005	0.0904937949256091	Gentianales
Arecales - Gentianales	metastat	bASV1825|Nocardioides	Bacteria	0.000444295977279274	2.24240061560298e-07	6.63088527435267e-05	0.000200611949754018	1.71147020320906e-07	4.74545517090474e-05	0.004995004995005	0.0904937949256091	Arecales
Arecales - Gentianales	metastat	bASV478|NB1-j	Bacteria	0.000578617543822566	2.17095173875128e-07	6.52439124761736e-05	0.00090940287513859	9.51225193863955e-07	0.000111875470823117	0.00599400599400599	0.09642269873108	Gentianales
Arecales - Gentianales	metastat	bASV322|RCP2-54	Bacteria	0.000810777687970081	3.46670143540462e-07	8.24466724307963e-05	0.000495942366365249	5.62625447636996e-07	8.60404928872229e-05	0.00599400599400599	0.09642269873108	Arecales
Arecales - Gentianales	metastat	bASV167|Arthrobacter	Bacteria	0.000307024310580435	2.19776084036857e-07	6.56455252177545e-05	0.000599366816114526	6.31146487135627e-07	9.11293533459897e-05	0.00599400599400599	0.09642269873108	Gentianales
Arecales - Gentianales	metastat	bASV700|Acidibacter	Bacteria	0.000551791144728085	2.81569963168201e-07	7.43032951487666e-05	0.000300614817705319	1.80659590522863e-07	4.87555112300223e-05	0.00599400599400599	0.09642269873108	Arecales
Arecales - Gentianales	metastat	bASV830|Ellin6067	Bacteria	0.000487816830889218	1.59453405788763e-07	5.59154483877857e-05	0.000260441846245655	1.62690435456116e-07	4.62673062153242e-05	0.00599400599400599	0.09642269873108	Arecales
Arecales - Gentianales	metastat	bASV1182|uncultured_Alphaproteobacteria	Bacteria	0.000266313498027022	1.62894937072129e-07	5.65156471604397e-05	0.000593084155742438	6.58627890081939e-07	9.30921932733705e-05	0.00599400599400599	0.09642269873108	Gentianales
Arecales - Gentianales	metastat	bASV654|Bacillus	Bacteria	0.000401748464779507	2.61185762199922e-07	7.15631850527939e-05	0.000164057510092439	1.59406400735122e-07	4.57979545531413e-05	0.00599400599400599	0.09642269873108	Arecales
Arecales - Gentianales	metastat	bASV1021|Pseudomonas_oryzae	Bacteria	0.000472784374433024	2.19491457316648e-07	6.56030034756969e-05	0.000256539870390313	1.58655578259292e-07	4.5689970432783e-05	0.00599400599400599	0.09642269873108	Arecales
Arecales - Gentianales	metastat	bASV859|Ellin6067	Bacteria	0.000439954400863367	2.70076685856849e-07	7.2771019584109e-05	0.000210141551105555	1.33559674894355e-07	4.19209272720294e-05	0.00599400599400599	0.09642269873108	Arecales
Arecales - Gentianales	metastat	bASV2027|uncultured_Rhodospirillales	Bacteria	0.000214402640016434	1.65278802669213e-07	5.69276807594621e-05	0.000491305756119803	4.54677790724916e-07	7.73472850818849e-05	0.00599400599400599	0.09642269873108	Gentianales
Arecales - Gentianales	metastat	bASV1494|Nocardioides_iriomotensis	Bacteria	0.000440245625914915	2.63426162090276e-07	7.18694571046367e-05	0.000203583549788922	1.22709221954996e-07	4.01820236638677e-05	0.00599400599400599	0.09642269873108	Arecales
Arecales - Gentianales	metastat	bASV3854|uncultured_bacterium	Bacteria	0.000414741382166565	1.90315459016289e-07	6.10874427929837e-05	0.000198803412010601	1.90878727026237e-07	5.01154886009669e-05	0.00599400599400599	0.09642269873108	Arecales
Arecales - Gentianales	metastat	bASV4520|uncultured_Mesorhizobium	Bacteria	8.54715814579162e-05	5.18393500112962e-08	3.1881936003931e-05	0.000239973032709956	1.42152789520906e-07	4.32484848412583e-05	0.00599400599400599	0.09642269873108	Gentianales
Arecales - Gentianales	metastat	bASV45|Reyranella	Bacteria	0.00103664688020654	2.38011215446049e-07	6.83146146689968e-05	0.00169706025181319	5.59663271619448e-06	0.000271366733702666	0.00699300699300699	0.105235526034458	Gentianales
Arecales - Gentianales	metastat	bASV511|Brevundimonas	Bacteria	0.000523439050179635	3.65688022942264e-07	8.4677939222827e-05	0.00115016356386378	5.9843813554494e-06	0.000280609800149823	0.00699300699300699	0.105235526034458	Gentianales
Arecales - Gentianales	metastat	bASV885|Phenylobacterium	Bacteria	0.000246411429818958	1.39951850861151e-07	5.23846727435988e-05	0.000509765810141018	4.31031133238729e-07	7.53091115301261e-05	0.00699300699300699	0.105235526034458	Gentianales
Arecales - Gentianales	metastat	bASV1290|Nocardioides	Bacteria	0.000548264972938483	2.27829970864595e-07	6.68375218771487e-05	0.00030092884950362	1.66766526176454e-07	4.68433175283157e-05	0.00699300699300699	0.105235526034458	Arecales
Arecales - Gentianales	metastat	bASV1901|uncultured_beta	Bacteria	0.000389619309632861	1.96151029656111e-07	6.20169220512278e-05	0.000198392958156168	1.40767497179924e-07	4.30372386458769e-05	0.00699300699300699	0.105235526034458	Arecales
Arecales - Gentianales	metastat	bASV3696|Pedosphaeraceae	Bacteria	0.000358825852139147	2.14463640141021e-07	6.48472776184924e-05	0.000151447320013777	1.25948253389187e-07	4.07088916624371e-05	0.00699300699300699	0.105235526034458	Arecales
Arecales - Gentianales	metastat	bASV1002|Polyangiaceae	Bacteria	0.000417382095257284	2.74677204303831e-07	7.33881975209177e-05	0.000166590063098272	1.11487076458347e-07	3.83005902899316e-05	0.00699300699300699	0.105235526034458	Arecales
Arecales - Gentianales	metastat	bASV1486|Steroidobacter	Bacteria	8.79777885103268e-05	7.46599315354056e-08	3.82612104641819e-05	0.000266012541610978	1.64104262444019e-07	4.6467909476385e-05	0.00699300699300699	0.105235526034458	Gentianales
Arecales - Gentianales	metastat	bASV440|Bacillus	Bacteria	0.000805220375979492	8.99973363499685e-07	0.000132840267009704	0.000409744806753295	3.05595400700244e-07	6.34112932723887e-05	0.00799200799200799	0.110469462249929	Arecales
Arecales - Gentianales	metastat	bASV723|Gaiellales	Bacteria	0.000656564388156885	2.14337201144983e-07	6.48281591480823e-05	0.000391647178962479	3.90608923163333e-07	7.16909415076575e-05	0.00799200799200799	0.110469462249929	Arecales
Arecales - Gentianales	metastat	bASV600|Terrimonas	Bacteria	0.000517868309312835	2.34456888324415e-07	6.78026097485489e-05	0.000289680871846257	1.87408429770949e-07	4.96578331355992e-05	0.00799200799200799	0.110469462249929	Arecales
Arecales - Gentianales	metastat	bASV1922|Ellin6067	Bacteria	0.000208324553222401	1.16395334849916e-07	4.77730202901743e-05	0.000440932444249445	3.4970754662033e-07	6.78337311896494e-05	0.00799200799200799	0.110469462249929	Gentianales
Arecales - Gentianales	metastat	bASV1335|Bryobacter	Bacteria	0.000650535302372566	9.12101570902622e-07	0.00013373236155659	0.000256982853124139	2.78396224761819e-07	6.05236170478124e-05	0.00799200799200799	0.110469462249929	Arecales
Arecales - Gentianales	metastat	bASV2897|Sorangium	Bacteria	0.00036067632361554	1.39654328075257e-07	5.2328960990434e-05	0.000171405530175481	1.08528340884506e-07	3.77889466024451e-05	0.00799200799200799	0.110469462249929	Arecales
Arecales - Gentianales	metastat	bASV1788|Chloroflexi	Bacteria	0.000107249447875552	5.55853949178799e-08	3.30137805207485e-05	0.000297251591429223	2.80345356118755e-07	6.07351190479865e-05	0.00799200799200799	0.110469462249929	Gentianales
Arecales - Gentianales	metastat	bASV1578|SC-I-84	Bacteria	7.58832061320067e-05	6.43782268949446e-08	3.55291172759847e-05	0.000272611242006838	3.2770897411313e-07	6.56655174783468e-05	0.00799200799200799	0.110469462249929	Gentianales
Arecales - Gentianales	metastat	bASV5133|Subgroup_13	Bacteria	0.000275236950286391	1.41568412088394e-07	5.26863475429782e-05	0.000105191621748339	7.85697265614474e-08	3.21529499672735e-05	0.00799200799200799	0.110469462249929	Arecales
Arecales - Gentianales	metastat	bASV2106|Acidimicrobiia	Bacteria	8.87203769367456e-05	6.2299308016182e-08	3.49507519109507e-05	0.000245903536627449	1.6228498415169e-07	4.62096173846747e-05	0.00799200799200799	0.110469462249929	Gentianales
Arecales - Gentianales	metastat	bASV3788|Gaiellales	Bacteria	8.04824717976253e-05	5.5779257708702e-08	3.30713007827746e-05	0.000254302849644748	2.59192127630679e-07	5.83988247482997e-05	0.00799200799200799	0.110469462249929	Gentianales
Arecales - Gentianales	metastat	bASV925|uncultured_actinobacterium	Bacteria	0.000822252574637996	1.98045207109655e-07	6.23156429405272e-05	0.000587804260889501	3.05839492021166e-07	6.34366127909093e-05	0.00899100899100899	0.113361821481135	Arecales
Arecales - Gentianales	metastat	bASV780|MND1	Bacteria	0.00054734422896813	1.6141186286062e-07	5.62577860163652e-05	0.000343266490894191	2.04960786367641e-07	5.19312281022296e-05	0.00899100899100899	0.113361821481135	Arecales
Arecales - Gentianales	metastat	bASV1572|Gemmatimonadaceae	Bacteria	0.000553008479176293	2.18704445714049e-07	6.54852843391655e-05	0.000310569901174539	2.07228186526384e-07	5.22176853644514e-05	0.00899100899100899	0.113361821481135	Arecales
Arecales - Gentianales	metastat	bASV1833|Sphingomonadaceae	Bacteria	0.000229246409328796	1.45391466159099e-07	5.33930057399199e-05	0.000444895007096265	3.21300111026976e-07	6.50202509978901e-05	0.00899100899100899	0.113361821481135	Gentianales
Arecales - Gentianales	metastat	bASV1348|metagenome	Bacteria	0.000451322749712002	2.17082735096341e-07	6.52420433277141e-05	0.000226520148685332	1.597972495328e-07	4.58540662165252e-05	0.00899100899100899	0.113361821481135	Arecales
Arecales - Gentianales	metastat	bASV776|Arthrobacter_crystallopoietes	Bacteria	0.000335447834197519	2.13025022735757e-07	6.46294145889693e-05	0.000136606369940943	8.70216523323742e-08	3.38381698857289e-05	0.00899100899100899	0.113361821481135	Arecales
Arecales - Gentianales	metastat	bASV1592|Hyphomicrobium	Bacteria	0.000414102355741268	2.39401081102584e-07	6.8513785803652e-05	0.000199317664994518	1.38963643881105e-07	4.27606010064824e-05	0.00899100899100899	0.113361821481135	Arecales
Arecales - Gentianales	metastat	bASV1845|Chitinophagaceae	Bacteria	0.000134350894291548	8.6947934156981e-08	4.12899679590388e-05	0.000336701872075351	2.9483648913791e-07	6.22850502822043e-05	0.00899100899100899	0.113361821481135	Gentianales
Arecales - Gentianales	metastat	bASV1326|Streptomyces	Bacteria	0.00049418706678453	2.48161832966087e-07	6.97561344503313e-05	0.000243286513279234	2.56940900286765e-07	5.81446585643316e-05	0.00899100899100899	0.113361821481135	Arecales
Arecales - Gentianales	metastat	bASV4131|Hamadaea	Bacteria	0.000395900607602551	1.50582960349338e-07	5.43378971406999e-05	0.000215036139326244	1.33656862634532e-07	4.19361768572403e-05	0.00899100899100899	0.113361821481135	Arecales
Arecales - Gentianales	metastat	bASV3131|Lechevalieria	Bacteria	0.000343811863477162	1.85072097485321e-07	6.02400585704806e-05	0.000154765107830782	9.40047432861797e-08	3.51696533523351e-05	0.00899100899100899	0.113361821481135	Arecales
Arecales - Gentianales	metastat	bASV3208|Sphingomonadaceae	Bacteria	0.000431892986025169	2.37402076185105e-07	6.82271402764045e-05	0.000230190472428909	1.78274203622538e-07	4.84325634832569e-05	0.00899100899100899	0.113361821481135	Arecales
Arecales - Gentianales	metastat	bASV1045|Rhizobium_tibeticum	Bacteria	7.07112600195163e-05	4.86115950338546e-08	3.08734275725191e-05	0.00022994440843597	1.9680380983334e-07	5.08873639875027e-05	0.00899100899100899	0.113361821481135	Gentianales
Arecales - Gentianales	metastat	bASV1626|MND1	Bacteria	0.000589208441474062	2.43777345593057e-07	6.91371676654825e-05	0.000345282465284554	3.0167257137288e-07	6.3002983573136e-05	0.00999000999000999	0.116510760966722	Arecales
Arecales - Gentianales	metastat	bASV1831|Nocardioides	Bacteria	0.000475423484971043	2.29347590904481e-07	6.70597613055876e-05	0.000251187103314091	1.36004954830839e-07	4.23029417340348e-05	0.00999000999000999	0.116510760966722	Arecales
Arecales - Gentianales	metastat	bASV3059|uncultured_bacterium	Bacteria	0.000452902796806555	2.74984997816264e-07	7.34293041113674e-05	0.00022936290838341	1.40115607253552e-07	4.2937470945911e-05	0.00999000999000999	0.116510760966722	Arecales
Arecales - Gentianales	metastat	bASV2999|uncultured_bacterium	Bacteria	0.000422665357314351	2.66265184015357e-07	7.22556984679093e-05	0.000207988817061644	1.19452088929815e-07	3.96451511818837e-05	0.00999000999000999	0.116510760966722	Arecales
Arecales - Gentianales	metastat	bASV2342|Candidatus_Solibacter	Bacteria	0.000392783437530563	2.00976606300138e-07	6.27751365636981e-05	0.000189877229157096	1.75220712229767e-07	4.80159940773257e-05	0.00999000999000999	0.116510760966722	Arecales
Arecales - Gentianales	metastat	bASV1246|Allorhizobium-Neorhizobium-Pararhizobium-Rhizobium	Bacteria	0.000346281981237394	1.9452217536077e-07	6.1758888438763e-05	0.000147033560251821	9.44707838890108e-08	3.52567246084852e-05	0.00999000999000999	0.116510760966722	Arecales
Arecales - Gentianales	metastat	bASV2603|Xanthobacteraceae	Bacteria	0.000404572218975485	1.82089392368301e-07	5.97526588740258e-05	0.00021126693934394	1.36394038387811e-07	4.23634087372536e-05	0.00999000999000999	0.116510760966722	Arecales
Arecales - Gentianales	metastat	bASV2921|S0134_terrestrial_group	Bacteria	0.000141359089006768	7.6722749124069e-08	3.87861783356353e-05	0.000369639052777893	5.24835341488301e-07	8.31007110527801e-05	0.00999000999000999	0.116510760966722	Gentianales
Arecales - Gentianales	metastat	bASV1885|uncultured_bacterium	Bacteria	0.000438397543493795	2.35546178273229e-07	6.79599331603655e-05	0.000222689326664068	1.64788110850868e-07	4.65646283831278e-05	0.00999000999000999	0.116510760966722	Arecales
Arecales - Gentianales	metastat	bASV1549|uncultured_bacterium	Bacteria	0.000392548334979963	2.14498608168718e-07	6.48525640366804e-05	0.00017834376838183	1.84090536183606e-07	4.92162970686816e-05	0.00999000999000999	0.116510760966722	Arecales
Arecales - Gentianales	metastat	bASV1467|uncultured_Chloroflexi	Bacteria	0.000559174203496536	3.4095301668105e-07	8.17640096145968e-05	0.00029107208919983	2.39775405437951e-07	5.61688485304461e-05	0.00999000999000999	0.116510760966722	Arecales
Arecales - Gentianales	metastat	bASV2621|uncultured_bacterium	Bacteria	8.62740954592729e-05	7.77273989939914e-08	3.90392961891094e-05	0.000242862614779248	2.16240512163183e-07	5.33410713886025e-05	0.00999000999000999	0.116510760966722	Gentianales
Arecales - Gentianales	metastat	bASV72|Mycobacterium	Bacteria	0.000905316360825011	2.0200306843668e-07	6.29352403598381e-05	0.00123738018851712	9.49596276017502e-07	0.000111779639659177	0.010989010989011	0.121336650474219	Gentianales
Arecales - Gentianales	metastat	bASV129|Sphingomonas	Bacteria	0.000739644778297045	3.47361681962672e-07	8.25288638708731e-05	0.000485365573705322	2.52547955021335e-07	5.76454630320155e-05	0.010989010989011	0.121336650474219	Arecales
Arecales - Gentianales	metastat	bASV1687|Flavobacterium	Bacteria	0.000422318433829918	1.7706135984919e-07	5.8921909079662e-05	0.000233095797572528	1.46775297790568e-07	4.39460341589198e-05	0.010989010989011	0.121336650474219	Arecales
Arecales - Gentianales	metastat	bASV3162|Arenimonas	Bacteria	0.000409780115533811	2.85573860853652e-07	7.48297231567688e-05	0.000191571714017261	1.11623034515165e-07	3.83239368848952e-05	0.010989010989011	0.121336650474219	Arecales
Arecales - Gentianales	metastat	bASV1846|mle1-7	Bacteria	0.000330501819283276	1.42459562311777e-07	5.28519134110707e-05	0.000161744593126981	1.05512740377559e-07	3.72602406229975e-05	0.010989010989011	0.121336650474219	Arecales
Arecales - Gentianales	metastat	bASV5306|0319-6G20	Bacteria	0.000360116383628846	1.65303698080999e-07	5.6931968014292e-05	0.000189610953805811	1.31785248065023e-07	4.16415228096692e-05	0.010989010989011	0.121336650474219	Arecales
Arecales - Gentianales	metastat	bASV5163|Bacillus	Bacteria	0.000160346370414704	1.06102104053687e-07	4.56117683588061e-05	0.000362159222897066	3.62665951633176e-07	6.9079088125322e-05	0.010989010989011	0.121336650474219	Gentianales
Arecales - Gentianales	metastat	bASV2025|uncultured_bacterium	Bacteria	0.000118381827581007	5.92525410067108e-08	3.40854005337087e-05	0.000295455695541755	2.83382494447619e-07	6.1063221600285e-05	0.010989010989011	0.121336650474219	Gentianales
Arecales - Gentianales	metastat	bASV4472|Roseomonas	Bacteria	0.00032157834018194	1.82875893210748e-07	5.98815650067843e-05	0.000140649151792732	8.58737347238245e-08	3.36142464165952e-05	0.010989010989011	0.121336650474219	Arecales
Arecales - Gentianales	metastat	bASV117|uncultured_Rhodobium	Bacteria	0.000814140484427186	2.10532923982063e-07	6.42502649696319e-05	0.0013458691188929	5.36747740250216e-06	0.000265753085898362	0.011988011988012	0.125674528683205	Gentianales
Arecales - Gentianales	metastat	bASV1186|uncultured_organism	Bacteria	0.000196247157812969	1.07285834149341e-07	4.58654969105299e-05	0.000393346273241053	2.09933609032884e-07	5.25574383829735e-05	0.011988011988012	0.125674528683205	Gentianales
Arecales - Gentianales	metastat	bASV3293|Burkholderiales	Bacteria	0.000434686067275436	1.78696678460564e-07	5.91933817280548e-05	0.000246680259124512	1.64259933540395e-07	4.64899442353419e-05	0.011988011988012	0.125674528683205	Arecales
Arecales - Gentianales	metastat	bASV899|Rhodanobacteraceae	Bacteria	0.000178299720938455	1.30487256921561e-07	5.05823453897568e-05	0.000441117974698732	6.06806428233163e-07	8.93548829574024e-05	0.011988011988012	0.125674528683205	Gentianales
Arecales - Gentianales	metastat	bASV4377|bacterium_Ellin6517	Bacteria	0.000387257827757564	1.85643641777208e-07	6.03330042961249e-05	0.000205654526579979	1.09547640284853e-07	3.7965988984057e-05	0.011988011988012	0.125674528683205	Arecales
Arecales - Gentianales	metastat	bASV4385|Pedosphaeraceae	Bacteria	0.000360868540539921	2.47792751956419e-07	6.97042424168728e-05	0.000152335455205576	9.28321043026119e-08	3.49496073885432e-05	0.011988011988012	0.125674528683205	Arecales
Arecales - Gentianales	metastat	bASV2010|uncultured_bacterium	Bacteria	0.000283365213725502	2.10982319239966e-07	6.43188014533192e-05	8.21613812382089e-05	1.42321043466095e-07	4.32740720150579e-05	0.011988011988012	0.125674528683205	Arecales
Arecales - Gentianales	metastat	bASV4174|Ramlibacter	Bacteria	0.000350128133815669	1.28444172225959e-07	5.0184790334335e-05	0.000182093948193391	1.51433000543097e-07	4.46378704782187e-05	0.011988011988012	0.125674528683205	Arecales
Arecales - Gentianales	metastat	bASV4352|0319-6G20	Bacteria	0.000198014196887352	1.04675275830964e-07	4.5304043846465e-05	6.03192287776984e-05	4.68550000539386e-08	2.48296830145787e-05	0.011988011988012	0.125674528683205	Arecales
Arecales - Gentianales	metastat	bASV156|uncultured_Alphaproteobacteria	Bacteria	0.000615641156022164	2.80667164420374e-07	7.41840800558504e-05	0.00112210623674605	5.2539470657923e-06	0.000262927523178224	0.012987012987013	0.129594857118065	Gentianales
Arecales - Gentianales	metastat	bASV1412|uncultured_soil	Bacteria	0.000615525797864397	2.13985763312487e-07	6.47749896228244e-05	0.00039396371733154	1.88630948241079e-07	4.98195359378912e-05	0.012987012987013	0.129594857118065	Arecales
Arecales - Gentianales	metastat	bASV327|Rhodomicrobium	Bacteria	0.000824851420545677	9.03397071949957e-07	0.000133092704824307	0.000430473453292792	6.07734434689177e-07	8.94231833452289e-05	0.012987012987013	0.129594857118065	Arecales
Arecales - Gentianales	metastat	bASV3872|uncultured_Sphingomonadaceae	Bacteria	0.000167649759523457	1.09664949396199e-07	4.63712532223969e-05	0.000364891699759865	2.52807323127774e-07	5.76750565358898e-05	0.012987012987013	0.129594857118065	Gentianales
Arecales - Gentianales	metastat	bASV2158|Candidatus_Solibacter	Bacteria	0.000193207773062044	1.24370858191537e-07	4.93826313420562e-05	0.000408104704576772	3.37572181994242e-07	6.6646374520797e-05	0.012987012987013	0.129594857118065	Gentianales
Arecales - Gentianales	metastat	bASV2137|NB1-j	Bacteria	0.000362831574694297	1.84327618721411e-07	6.01187743866519e-05	0.000196553890617997	1.2393111197338e-07	4.03815864716275e-05	0.012987012987013	0.129594857118065	Arecales
Arecales - Gentianales	metastat	bASV2285|uncultured_bacterium	Bacteria	0.000401603894643302	2.13292598665105e-07	6.46699916264324e-05	0.000186918298139168	1.4460468103293e-07	4.36198712914874e-05	0.012987012987013	0.129594857118065	Arecales
Arecales - Gentianales	metastat	bASV1079|Alcaligenaceae	Bacteria	4.43279262127469e-05	2.37839565199755e-08	2.15951867004426e-05	0.000156286037420332	1.2627814610442e-07	4.0762170624312e-05	0.012987012987013	0.129594857118065	Gentianales
Arecales - Gentianales	metastat	bASV2988|JG30-KF-CM66	Bacteria	8.26675235709747e-05	7.2216377366075e-08	3.76298737618771e-05	0.000251450375775891	2.38076565946675e-07	5.59695130766312e-05	0.012987012987013	0.129594857118065	Gentianales
Arecales - Gentianales	metastat	bASV101|Enterobacterales	Bacteria	0.000297688376461298	2.08654085655764e-07	6.3962931307794e-05	0.00057630276127683	5.73823267203568e-07	8.68924976474687e-05	0.013986013986014	0.136640892442647	Gentianales
Arecales - Gentianales	metastat	bASV500|Bacillus	Bacteria	0.000695243981910825	2.68918916924446e-07	7.2614874094052e-05	0.000381232239720166	9.68381143793991e-07	0.000112879835024614	0.013986013986014	0.136640892442647	Arecales
Arecales - Gentianales	metastat	bASV1389|Gemmatimonas	Bacteria	0.000220381325346676	1.7386527578738e-07	5.83876960896258e-05	0.000484890596822772	6.43857788549798e-07	9.20424522013303e-05	0.013986013986014	0.136640892442647	Gentianales
Arecales - Gentianales	metastat	bASV2349|uncultured_bacterium	Bacteria	0.000363798166034081	2.08810457364879e-07	6.3986894700626e-05	0.000168458800099787	1.0568093733787e-07	3.72899269130753e-05	0.013986013986014	0.136640892442647	Arecales
Arecales - Gentianales	metastat	bASV299|Rhizobiaceae	Bacteria	0.000704365418063549	2.88033162652469e-07	7.51512413178721e-05	0.000445902232200245	3.40294071962561e-07	6.69145244207471e-05	0.014985014985015	0.142666237918435	Arecales
Arecales - Gentianales	metastat	bASV1908|uncultured_gamma	Bacteria	0.000539434903176445	2.42319216312766e-07	6.89300890946998e-05	0.000331258782123129	1.73969593001369e-07	4.78442639417023e-05	0.014985014985015	0.142666237918435	Arecales
Arecales - Gentianales	metastat	bASV895|Gaiella	Bacteria	0.000500042464868479	2.49559548145508e-07	6.99523014163318e-05	0.000253622710049123	4.4251448435212e-07	7.63056944443411e-05	0.014985014985015	0.142666237918435	Arecales
Arecales - Gentianales	metastat	bASV3366|Nocardioides	Bacteria	0.000145585173013705	8.26386853800979e-08	4.02537747298551e-05	0.000295419817847434	1.60038619081895e-07	4.58886838306477e-05	0.014985014985015	0.142666237918435	Gentianales
Arecales - Gentianales	metastat	bASV4745|Bryobacter	Bacteria	0.000404305851884569	1.99646103647563e-07	6.25669999543334e-05	0.000209765494646506	1.58383691378652e-07	4.56508043652331e-05	0.014985014985015	0.142666237918435	Arecales
Arecales - Gentianales	metastat	bASV370|Hyphomicrobium	Bacteria	0.000548160904057362	2.93442979116801e-07	7.58537006628616e-05	0.0011030975097032	4.85136117378744e-06	0.000252653319105643	0.015984015984016	0.148391814962591	Gentianales
Arecales - Gentianales	metastat	bASV1134|Xanthobacteraceae	Bacteria	0.000323931080010796	1.59220567839973e-07	5.58746088883926e-05	0.000562123829441332	4.95745392996382e-07	8.0764879107944e-05	0.015984015984016	0.148391814962591	Gentianales
Arecales - Gentianales	metastat	bASV2146|uncultured_Rubrobacterales	Bacteria	0.000426598685429071	1.96715098807357e-07	6.21060286940346e-05	0.000230908975505802	1.46393224841922e-07	4.3888798601202e-05	0.015984015984016	0.148391814962591	Arecales
Arecales - Gentianales	metastat	bASV1984|Xanthobacteraceae	Bacteria	0.000340426889979568	1.67424647830252e-07	5.72960402817309e-05	0.000169341494703985	1.3480842937059e-07	4.21164471827484e-05	0.015984015984016	0.148391814962591	Arecales
Arecales - Gentianales	metastat	bASV1435|Rhizobiales	Bacteria	0.000107514489213363	7.92134318891005e-08	3.94107161422513e-05	0.000322091143747532	5.71947364016839e-07	8.67503499171495e-05	0.015984015984016	0.148391814962591	Gentianales
Arecales - Gentianales	metastat	bASV752|Reyranella	Bacteria	0.000408100113022932	2.55883694564795e-07	7.08330949797321e-05	0.000709447955659195	6.75643447515774e-07	9.42870370838413e-05	0.016983016983017	0.152360225879559	Gentianales
Arecales - Gentianales	metastat	bASV363|Xanthomonadaceae	Bacteria	0.000178515529141323	1.86215223786264e-07	6.04258131742542e-05	0.000465984234138375	8.57700366609987e-07	0.00010623338053364	0.016983016983017	0.152360225879559	Gentianales
Arecales - Gentianales	metastat	bASV1517|uncultured_soil	Bacteria	0.000454994156849965	2.26524490296179e-07	6.6645755097186e-05	0.000250895667439734	1.48574027694778e-07	4.42144932916408e-05	0.016983016983017	0.152360225879559	Arecales
Arecales - Gentianales	metastat	bASV1371|uncultured_Chloroflexi	Bacteria	0.000508445240861397	3.06954153895392e-07	7.7580338359082e-05	0.000254736870090927	2.84179594101271e-07	6.11490407573417e-05	0.016983016983017	0.152360225879559	Arecales
Arecales - Gentianales	metastat	bASV372|Pseudomonas	Bacteria	0.000256681697190711	2.53216280318393e-07	7.04629342582483e-05	0.000534812634909197	6.41365853183521e-07	9.18641626750808e-05	0.016983016983017	0.152360225879559	Gentianales
Arecales - Gentianales	metastat	bASV3330|uncultured_bacterium	Bacteria	0.000324148349422661	2.02971010208383e-07	6.30858441298533e-05	0.000134573731269013	1.28012426396914e-07	4.10411260997836e-05	0.016983016983017	0.152360225879559	Arecales
Arecales - Gentianales	metastat	bASV1471|Nocardioides	Bacteria	7.39172269987836e-05	5.28007145094569e-08	3.21762043696333e-05	0.00022250679060379	1.91506811095677e-07	5.01978730802931e-05	0.016983016983017	0.152360225879559	Gentianales
Arecales - Gentianales	metastat	bASV320|uncultured_bacterium	Bacteria	0.000818335280917564	2.47619819061577e-07	6.96799151107035e-05	0.00109497051842553	7.24677087968822e-07	9.76484758800414e-05	0.017982017982018	0.158121747026265	Gentianales
Arecales - Gentianales	metastat	bASV468|uncultured_bacterium	Bacteria	0.000556888232667781	2.54002087898624e-07	7.05721835856838e-05	0.000813981010438588	4.71309153296311e-07	7.87491982662874e-05	0.017982017982018	0.158121747026265	Gentianales
Arecales - Gentianales	metastat	bASV489|Novosphingobium	Bacteria	0.000448576032593667	2.19009427778749e-07	6.55309278544541e-05	0.000751891309746245	1.1180933960457e-06	0.000121292024515743	0.017982017982018	0.158121747026265	Gentianales
Arecales - Gentianales	metastat	bASV3518|uncultured_Bradyrhizobiaceae	Bacteria	0.000550984557574151	1.7953022144196e-07	5.93312769155578e-05	0.000358142970497514	1.92813896496813e-07	5.03688887499559e-05	0.017982017982018	0.158121747026265	Arecales
Arecales - Gentianales	metastat	bASV547|Streptomyces	Bacteria	0.00061025576592076	2.61551990678505e-07	7.16133395776296e-05	0.000397382327746185	2.38642078597619e-07	5.60359469445165e-05	0.018981018981019	0.158121747026265	Arecales
Arecales - Gentianales	metastat	bASV595|Nitrospira	Bacteria	0.000587252707638411	3.6347415226219e-07	8.44212305169957e-05	0.000348584056046782	2.74986827425118e-07	6.01518722009371e-05	0.018981018981019	0.158121747026265	Arecales
Arecales - Gentianales	metastat	bASV3790|Myxococcales_bacterium	Bacteria	0.000507308588828608	1.60248763112579e-07	5.60547287037461e-05	0.000296847651634742	3.64210553859101e-07	6.922603650163e-05	0.018981018981019	0.158121747026265	Arecales
Arecales - Gentianales	metastat	bASV1524|Alphaproteobacteria	Bacteria	0.000491023316865135	2.57160229187113e-07	7.10095587582505e-05	0.000290371189734496	1.65035238147312e-07	4.6599531021374e-05	0.018981018981019	0.158121747026265	Arecales
Arecales - Gentianales	metastat	bASV866|Paenibacillus	Bacteria	0.000497677044657893	2.97441057328186e-07	7.63686951222182e-05	0.000279552595655712	2.65298203553012e-07	5.90827033591375e-05	0.018981018981019	0.158121747026265	Arecales
Arecales - Gentianales	metastat	bASV2041|Pedosphaeraceae	Bacteria	0.00042658579697495	2.39949264278988e-07	6.85921827534458e-05	0.000227457186424867	1.27121361080758e-07	4.08980377023729e-05	0.018981018981019	0.158121747026265	Arecales
Arecales - Gentianales	metastat	bASV513|Bacillus_nealsonii	Bacteria	0.000436059317978489	2.56327660131802e-07	7.08945170771616e-05	0.000228488624127846	2.43836166688532e-07	5.66424806512108e-05	0.018981018981019	0.158121747026265	Arecales
Arecales - Gentianales	metastat	bASV1879|uncultured_Chloroflexi	Bacteria	0.000193316935239085	1.08644201489412e-07	4.61549397202152e-05	0.00037677874973879	3.2276975063506e-07	6.51687839620542e-05	0.018981018981019	0.158121747026265	Gentianales
Arecales - Gentianales	metastat	bASV1050|uncultured_forest	Bacteria	0.000205310519549651	1.69924533114947e-07	5.77222105474933e-05	0.000477318765539407	7.04292016471918e-07	9.62652596565125e-05	0.018981018981019	0.158121747026265	Gentianales
Arecales - Gentianales	metastat	bASV2534|Bryobacter	Bacteria	0.000160509958918347	1.03373592001459e-07	4.50214746148902e-05	0.00036639194623286	4.4571514586576e-07	7.65811528505408e-05	0.018981018981019	0.158121747026265	Gentianales
Arecales - Gentianales	metastat	bASV5803|KD3-93	Bacteria	0.000309192515156208	1.78622736012663e-07	5.91811337208369e-05	0.00014039221201561	8.46940527016987e-08	3.33825617693656e-05	0.018981018981019	0.158121747026265	Arecales
Arecales - Gentianales	metastat	bASV3337|Xanthobacteraceae	Bacteria	0.000240925024310378	1.54138580810224e-07	5.49756774758252e-05	8.49544381399686e-05	6.44773755237754e-08	2.91270753775534e-05	0.018981018981019	0.158121747026265	Arecales
Arecales - Gentianales	metastat	bASV82|uncultured_bacterium	Bacteria	0.000810788993926827	1.77970609741234e-07	5.90730039768397e-05	0.00109119231740827	8.46225926693012e-07	0.000105520385078018	0.01998001998002	0.159330955168166	Gentianales
Arecales - Gentianales	metastat	bASV501|Streptomyces	Bacteria	0.000736636181891269	3.29300685526936e-07	8.03546898867929e-05	0.000499606381589335	3.38319165212696e-07	6.67200716675645e-05	0.01998001998002	0.159330955168166	Arecales
Arecales - Gentianales	metastat	bASV487|Enterobacteriaceae	Bacteria	0.00050180929457168	3.03245624288349e-07	7.71102628260654e-05	0.000809924638118663	9.05662572307649e-07	0.000109163239204055	0.01998001998002	0.159330955168166	Gentianales
Arecales - Gentianales	metastat	bASV1668|Aeromicrobium	Bacteria	0.000411274071161187	1.96235961667035e-07	6.20303470428435e-05	0.000241674924150484	1.36905587214451e-07	4.2442776834855e-05	0.01998001998002	0.159330955168166	Arecales
Arecales - Gentianales	metastat	bASV1346|Streptomyces	Bacteria	0.00037952711240074	2.16108317443915e-07	6.5095452906454e-05	0.000187205310709647	1.23667677077274e-07	4.03386449615323e-05	0.01998001998002	0.159330955168166	Arecales
Arecales - Gentianales	metastat	bASV2205|Microtrichales	Bacteria	0.000157986592747668	9.18693457493431e-08	4.24424283067705e-05	0.000316662653325596	1.87535008652932e-07	4.96746001828706e-05	0.01998001998002	0.159330955168166	Gentianales
Arecales - Gentianales	metastat	bASV3147|Gaiella	Bacteria	0.000343802738826032	1.48057488505893e-07	5.38803118951577e-05	0.000194584621216415	1.12553776980798e-07	3.84833827742226e-05	0.01998001998002	0.159330955168166	Arecales
Arecales - Gentianales	metastat	bASV2734|uncultured_Acidobacteria	Bacteria	0.000452622674005722	3.30143733279105e-07	8.04574827774547e-05	0.000223122813225311	1.95894972711394e-07	5.07697294695676e-05	0.01998001998002	0.159330955168166	Arecales
Arecales - Gentianales	metastat	bASV1010|Bacillus	Bacteria	0.000363108884117486	2.09420264363019e-07	6.40802597793777e-05	0.000172170967420802	1.2590541335828e-07	4.0701967713697e-05	0.01998001998002	0.159330955168166	Arecales
Arecales - Gentianales	metastat	bASV1805|uncultured_bacterium	Bacteria	0.000223421769883938	1.20484386404292e-07	4.86049272101477e-05	0.000404766707480335	2.8217072525023e-07	6.09325258024064e-05	0.01998001998002	0.159330955168166	Gentianales
Arecales - Gentianales	metastat	bASV1430|Subgroup_10	Bacteria	0.000508633645581361	1.97703122446138e-07	6.22618005896824e-05	0.000319738033276222	1.59826012948937e-07	4.58581928840558e-05	0.020979020979021	0.16311506535341	Arecales
Arecales - Gentianales	metastat	bASV3155|uncultured_Polyangiaceae	Bacteria	0.00043214802169602	1.77502440838841e-07	5.8995254185806e-05	0.00025137603294214	1.5244904069504e-07	4.47873690921659e-05	0.020979020979021	0.16311506535341	Arecales
Arecales - Gentianales	metastat	bASV985|Xanthobacteraceae	Bacteria	0.000316716827146372	1.78661324398861e-07	5.9187525911353e-05	0.000145484766504724	1.25792640546849e-07	4.06837353617494e-05	0.020979020979021	0.16311506535341	Arecales
Arecales - Gentianales	metastat	bASV287|Chryseobacterium	Bacteria	0.000207777276107833	1.8655759128331e-07	6.04813358479065e-05	0.000471944516864971	6.92441899289805e-07	9.5451964999335e-05	0.020979020979021	0.16311506535341	Gentianales
Arecales - Gentianales	metastat	bASV2296|uncultured_bacterium	Bacteria	0.00023212981393377	1.16022396674079e-07	4.7696424964495e-05	0.000101270387773811	7.19951429780308e-08	3.07783123785049e-05	0.020979020979021	0.16311506535341	Arecales
Arecales - Gentianales	metastat	bASV2730|Roseiflexaceae	Bacteria	9.27727043291414e-05	7.13887353208862e-08	3.74136221707942e-05	0.000236546108589079	1.59993496536188e-07	4.58822142665594e-05	0.020979020979021	0.16311506535341	Gentianales
Arecales - Gentianales	metastat	bASV219|Nitrospira	Bacteria	0.000626888817566321	3.71987095061474e-07	8.54041252460823e-05	0.00111475014598889	5.1440467405255e-06	0.000260163074884255	0.021978021978022	0.166714584797911	Gentianales
Arecales - Gentianales	metastat	bASV2038|Acidobacteriales	Bacteria	0.000218524499833724	1.31894145054926e-07	5.08542988051092e-05	0.000443729705628594	4.63052662371212e-07	7.80563782729823e-05	0.021978021978022	0.166714584797911	Gentianales
Arecales - Gentianales	metastat	bASV3253|Rhizobiales	Bacteria	0.000196553343316453	9.24589169885792e-08	4.25783975855425e-05	0.000353383103311395	2.50857393974914e-07	5.74521991213604e-05	0.021978021978022	0.166714584797911	Gentianales
Arecales - Gentianales	metastat	bASV2058|uncultured_Micromonospora	Bacteria	0.000441793960771897	2.5444242450924e-07	7.06333288698756e-05	0.000247820817203059	1.63805084463575e-07	4.6425532401161e-05	0.021978021978022	0.166714584797911	Arecales
Arecales - Gentianales	metastat	bASV1776|Conexibacter	Bacteria	0.00015196895458318	9.62511437782461e-08	4.34428052614609e-05	0.000333318238646253	3.31113105811112e-07	6.60056921200851e-05	0.021978021978022	0.166714584797911	Gentianales
Arecales - Gentianales	metastat	bASV1765|Lysinimonas	Bacteria	4.08601433345325e-05	2.87655099011124e-08	2.37493074826228e-05	0.000148197302421381	1.1868739186197e-07	3.95180491511173e-05	0.021978021978022	0.166714584797911	Gentianales
Arecales - Gentianales	metastat	bASV350|Afipia_sp.	Bacteria	0.00077321660464726	2.43633864347294e-07	6.91168184673237e-05	0.00103822063631807	8.05187467444932e-07	0.000102929937044889	0.022977022977023	0.170142698554578	Gentianales
Arecales - Gentianales	metastat	bASV141|Micrococcaceae	Bacteria	0.000584394739810593	2.23260980864974e-07	6.61639349757107e-05	0.000384831537840969	2.62721851700624e-07	5.8795122839782e-05	0.022977022977023	0.170142698554578	Arecales
Arecales - Gentianales	metastat	bASV923|Dongia	Bacteria	0.000512002095476438	2.50523905983362e-07	7.00873273185257e-05	0.000305153585143324	1.98682928918245e-07	5.11297277981582e-05	0.022977022977023	0.170142698554578	Arecales
Arecales - Gentianales	metastat	bASV1385|Devosia	Bacteria	8.76517874669973e-05	6.32773533782266e-08	3.52240318416406e-05	0.000229994211824563	1.88044017318156e-07	4.97419680527944e-05	0.022977022977023	0.170142698554578	Gentianales
Arecales - Gentianales	metastat	bASV2702|SC-I-84	Bacteria	0.000269195052021471	1.33990455727905e-07	5.12568418633265e-05	0.0001268502640211	8.94931310748001e-08	3.43153201697526e-05	0.022977022977023	0.170142698554578	Arecales
Arecales - Gentianales	metastat	bASV7445|Roseococcus	Bacteria	0.000135676970382676	6.35707408047276e-08	3.53055960694362e-05	0.000267279345829932	1.61999390499613e-07	4.61689389917777e-05	0.022977022977023	0.170142698554578	Gentianales
Arecales - Gentianales	metastat	bASV6|Bradyrhizobium	Bacteria	0.00134554972729668	9.06802286904145e-07	0.000133343305036738	0.00201831700734054	6.22878512061502e-06	0.000286282550909867	0.023976023976024	0.17408611755339	Gentianales
Arecales - Gentianales	metastat	bASV1656|Clostridium_sensu_stricto_1	Bacteria	0.000446616038986139	2.69585854951567e-07	7.27048633580525e-05	0.000252235998831964	1.88257247548622e-07	4.97701622128399e-05	0.023976023976024	0.17408611755339	Arecales
Arecales - Gentianales	metastat	bASV1307|Occallatibacter	Bacteria	0.000397663884393012	2.59522667053905e-07	7.13349826253221e-05	0.000189820038704223	2.58765704229779e-07	5.83507660426172e-05	0.023976023976024	0.17408611755339	Arecales
Arecales - Gentianales	metastat	bASV1367|Bradyrhizobium	Bacteria	0.000380286525279995	2.26806874715187e-07	6.66872823097959e-05	0.000187960058007621	2.03014674254587e-07	5.16840953667194e-05	0.023976023976024	0.17408611755339	Arecales
Arecales - Gentianales	metastat	bASV3723|IMCC26207	Bacteria	0.000118863246327209	7.1076233187524e-08	3.7331643831044e-05	0.000251995161269238	1.45936801831088e-07	4.38203272092398e-05	0.023976023976024	0.17408611755339	Gentianales
Arecales - Gentianales	metastat	bASV108|Variovorax	Bacteria	0.000925562705087491	2.7018659282528e-07	7.2785825061666e-05	0.00124568527977155	9.86341738101992e-07	0.000113921818649896	0.024975024975025	0.174547956504452	Gentianales
Arecales - Gentianales	metastat	bASV2717|Rhizobiales	Bacteria	0.000491719961332185	2.30565864666791e-07	6.72376331171167e-05	0.000299708217885196	2.10004326890024e-07	5.25662898395951e-05	0.024975024975025	0.174547956504452	Arecales
Arecales - Gentianales	metastat	bASV912|Marmoricola	Bacteria	0.000202587237496755	9.41771714020383e-08	4.29722143246253e-05	0.000412924434144002	5.67937297739257e-07	8.64457007651607e-05	0.024975024975025	0.174547956504452	Gentianales
Arecales - Gentianales	metastat	bASV3532|Pedosphaeraceae	Bacteria	0.000482221597664906	1.83792668362637e-07	6.00314735037556e-05	0.000317465277007522	1.87566163239342e-07	4.96787261521127e-05	0.024975024975025	0.174547956504452	Arecales
Arecales - Gentianales	metastat	bASV1462|Nocardioides	Bacteria	0.000395559339676796	1.61996704082488e-07	5.63596128659675e-05	0.000236696182135435	1.39934730439313e-07	4.29097477637524e-05	0.024975024975025	0.174547956504452	Arecales
Arecales - Gentianales	metastat	bASV1893|uncultured_Chloroflexi	Bacteria	0.000468906790068657	2.36853489277212e-07	6.81482653063089e-05	0.000267431212057268	1.46737193306295e-07	4.3940329351336e-05	0.024975024975025	0.174547956504452	Arecales
Arecales - Gentianales	metastat	bASV2642|uncultured_bacterium	Bacteria	0.00041385283229572	1.6314409320963e-07	5.65588524319944e-05	0.000238553395280433	1.63606421531545e-07	4.63973713995037e-05	0.024975024975025	0.174547956504452	Arecales
Arecales - Gentianales	metastat	bASV5426|uncultured_bacterium	Bacteria	0.000364036321946283	2.01997078269456e-07	6.29343072170601e-05	0.000192820517103353	1.05706696728834e-07	3.72944712864693e-05	0.024975024975025	0.174547956504452	Arecales
Arecales - Gentianales	metastat	bASV1539|uncultured_Hyphomicrobiaceae	Bacteria	0.000105592860033812	8.06693982924516e-08	3.9771257305938e-05	0.000264986890060584	2.95172511591094e-07	6.23205330266432e-05	0.024975024975025	0.174547956504452	Gentianales
Arecales - Gentianales	metastat	bASV2500|uncultured_bacterium	Bacteria	3.52584866288566e-05	2.13549076679563e-08	2.04627388138502e-05	0.00018088612607234	2.53099745731508e-07	5.77084033071154e-05	0.024975024975025	0.174547956504452	Gentianales
Arecales - Gentianales	metastat	bASV2315|uncultured_bacterium	Bacteria	0.000377968853922995	1.87430208886544e-07	6.06226206545895e-05	0.000215448514569143	1.22700798033526e-07	4.01806444031409e-05	0.025974025974026	0.180180210268239	Arecales
Arecales - Gentianales	metastat	bASV3335|metagenome	Bacteria	0.000273677435941209	1.4495244403931e-07	5.33123323920884e-05	0.000130255341605104	9.65385508495684e-08	3.56404838649239e-05	0.025974025974026	0.180180210268239	Arecales
Arecales - Gentianales	metastat	bASV128|metagenome	Bacteria	0.00088598657889962	3.04418319833688e-07	7.72592173362224e-05	0.00127367929555139	1.5255773624881e-06	0.000141680578586225	0.026973026973027	0.181706313132216	Gentianales
Arecales - Gentianales	metastat	bASV54|Pseudomonas	Bacteria	0.000455044657155099	2.23354435436852e-07	6.61777812717827e-05	0.000738185342331472	9.11598109182866e-07	0.000109520372364836	0.026973026973027	0.181706313132216	Gentianales
Arecales - Gentianales	metastat	bASV436|Bacillus_litoralis	Bacteria	0.000563674434165717	2.55000650103272e-07	7.07107682543683e-05	0.000328961767610183	5.22717766763215e-07	8.2932896682484e-05	0.026973026973027	0.181706313132216	Arecales
Arecales - Gentianales	metastat	bASV1360|Nocardioides	Bacteria	0.000488604244537946	2.27624436211676e-07	6.68073666555166e-05	0.000302890937799495	1.7127937934102e-07	4.7472897994127e-05	0.026973026973027	0.181706313132216	Arecales
Arecales - Gentianales	metastat	bASV928|uncultured_proteobacterium	Bacteria	0.00028652554762543	2.18458063966099e-07	6.5448387683087e-05	0.000563009385829153	6.96587848937184e-07	9.57372946728637e-05	0.026973026973027	0.181706313132216	Gentianales
Arecales - Gentianales	metastat	bASV1796|Myxococcaceae	Bacteria	0.000481636088512478	2.65696316977714e-07	7.21784712046838e-05	0.000273176925781855	2.07176615894373e-07	5.22111875355592e-05	0.026973026973027	0.181706313132216	Arecales
Arecales - Gentianales	metastat	bASV3294|uncultured_bacterium	Bacteria	0.000457208617886146	3.15001411959998e-07	7.85907009367231e-05	0.000257121240810956	1.35803592649139e-07	4.22716143169664e-05	0.026973026973027	0.181706313132216	Arecales
Arecales - Gentianales	metastat	bASV4826|uncultured_bacterium	Bacteria	0.000360419326623746	1.70667677852051e-07	5.78482934573057e-05	0.000199487987703595	1.58351133701714e-07	4.56461120875236e-05	0.026973026973027	0.181706313132216	Arecales
Arecales - Gentianales	metastat	bASV1498|Peredibacter	Bacteria	0.000626243557217677	2.37131341611893e-07	6.81882258843329e-05	0.00042908413973538	2.33113585782936e-07	5.53830662157638e-05	0.027972027972028	0.187085379616815	Arecales
Arecales - Gentianales	metastat	bASV1445|Acidobacteriales	Bacteria	0.000141825444994431	1.08374150980961e-07	4.6097541719357e-05	0.000327185117768763	4.09829021209679e-07	7.34335558255215e-05	0.027972027972028	0.187085379616815	Gentianales
Arecales - Gentianales	metastat	bASV408|Novosphingobium	Bacteria	0.000528612457838303	2.2030504464608e-07	6.57244760935093e-05	0.000816596474368638	1.05056680879886e-06	0.000117572307471596	0.028971028971029	0.187711781557496	Gentianales
Arecales - Gentianales	metastat	bASV1279|Pajaroellobacter	Bacteria	0.000542960095216694	1.62748302677865e-07	5.64902043699795e-05	0.00037586171087057	1.82333519681048e-07	4.89808662536827e-05	0.028971028971029	0.187711781557496	Arecales
Arecales - Gentianales	metastat	bASV480|Bacillus_litoralis	Bacteria	0.000427065013727634	2.35398826351749e-07	6.79386727998053e-05	0.000238464157041842	1.88476230022754e-07	4.97991003436431e-05	0.028971028971029	0.187711781557496	Arecales
Arecales - Gentianales	metastat	bASV528|Bacillus	Bacteria	0.0004665166294782	2.82225102592678e-07	7.43896870609959e-05	0.000260849151996643	1.63762963225152e-07	4.64195630301481e-05	0.028971028971029	0.187711781557496	Arecales
Arecales - Gentianales	metastat	bASV2036|Gaiella	Bacteria	0.000415217904743747	2.11057683117488e-07	6.43302879169692e-05	0.000237041404429545	1.73518853727302e-07	4.77822436915779e-05	0.028971028971029	0.187711781557496	Arecales
Arecales - Gentianales	metastat	bASV159|Comamonadaceae	Bacteria	0.000197742450061474	2.59436570083121e-07	7.13231489087329e-05	0.000443098400603594	6.78308449755181e-07	9.44728065688176e-05	0.028971028971029	0.187711781557496	Gentianales
Arecales - Gentianales	metastat	bASV2476|uncultured_bacterium	Bacteria	0.000358970932981114	2.46191602505398e-07	6.94786753157777e-05	0.00017713449481668	1.43411577882671e-07	4.34395493280561e-05	0.028971028971029	0.187711781557496	Arecales
Arecales - Gentianales	metastat	bASV2681|SC-I-84	Bacteria	0.000302203642777631	1.82534061156223e-07	5.98255734477933e-05	0.000148161919322014	1.16753892575396e-07	3.91948393111086e-05	0.028971028971029	0.187711781557496	Arecales
Arecales - Gentianales	metastat	bASV4274|Nitrospira	Bacteria	0.000260672526023799	1.36052392163648e-07	5.16497237552448e-05	0.000126040845830104	8.19595818825242e-08	3.28392379796768e-05	0.028971028971029	0.187711781557496	Arecales
Arecales - Gentianales	metastat	bASV2339|uncultured_bacterium	Bacteria	0.000271139042696474	1.16823064334233e-07	4.78607179248188e-05	0.000471010345275969	5.72233816191001e-07	8.67720710730282e-05	0.02997002997003	0.191524538575433	Gentianales
Arecales - Gentianales	metastat	bASV1679|uncultured_Holophaga	Bacteria	0.000382279608030609	2.16112660365172e-07	6.50961069835603e-05	0.000202115628901724	1.85500107461083e-07	4.94043610184954e-05	0.02997002997003	0.191524538575433	Arecales
Arecales - Gentianales	metastat	bASV2431|Nocardioides_baekrokdamisoli	Bacteria	0.00035186535668928	2.12687067883241e-07	6.45781283746849e-05	0.000175364320209956	1.75582855823247e-07	4.80655878411614e-05	0.02997002997003	0.191524538575433	Arecales
Arecales - Gentianales	metastat	bASV2199|uncultured_bacterium	Bacteria	0.000182113858907694	1.52643941014259e-07	5.47084860991417e-05	4.75710424009281e-05	3.45612549557409e-08	2.13249467685338e-05	0.02997002997003	0.191524538575433	Arecales
Arecales - Gentianales	metastat	bASV4294|metagenome	Bacteria	0.000512959024668206	1.567757220651e-07	5.54439696088073e-05	0.000351954999067165	1.57607452714884e-07	4.55387996390359e-05	0.030969030969031	0.192631124798313	Arecales
Arecales - Gentianales	metastat	bASV614|Fictibacillus	Bacteria	0.000530051739883884	2.18705843735082e-07	6.54854936391143e-05	0.000337496716046486	1.96427374648228e-07	5.08386734588505e-05	0.030969030969031	0.192631124798313	Arecales
Arecales - Gentianales	metastat	bASV1379|Acidobacteriales	Bacteria	0.000165865102490917	1.08511855345571e-07	4.61268190768499e-05	0.000348534363822626	3.45371606176504e-07	6.74118924164314e-05	0.030969030969031	0.192631124798313	Gentianales
Arecales - Gentianales	metastat	bASV2333|uncultured_bacterium	Bacteria	0.000147286301723402	8.94500996323389e-08	4.18798701311587e-05	0.000305287023535294	2.25552057821907e-07	5.44774286700352e-05	0.030969030969031	0.192631124798313	Gentianales
Arecales - Gentianales	metastat	bASV2183|beta_proteobacterium	Bacteria	0.000352032698304853	1.69042709128805e-07	5.75722409160371e-05	0.000188835942791109	1.27555325260321e-07	4.09677866487678e-05	0.030969030969031	0.192631124798313	Arecales
Arecales - Gentianales	metastat	bASV258|Lactococcus_garvieae	Bacteria	0.000165815387999025	1.2694422688653e-07	4.98909058644076e-05	0.000350171491954957	3.55455071608691e-07	6.83888910270069e-05	0.030969030969031	0.192631124798313	Gentianales
Arecales - Gentianales	metastat	bASV2650|uncultured_soil	Bacteria	0.00034120302557778	1.72813478470067e-07	5.82108201097051e-05	0.000183267690338913	1.18256136790214e-07	3.9446188660899e-05	0.030969030969031	0.192631124798313	Arecales
Arecales - Gentianales	metastat	bASV6223|uncultured_soil	Bacteria	0.000119088925132463	7.53854956249435e-08	3.84466770090486e-05	0.000254834173088479	1.52628167842254e-07	4.48136738769034e-05	0.030969030969031	0.192631124798313	Gentianales
Arecales - Gentianales	metastat	bASV176|Candidatus_Solibacter	Bacteria	0.000890822236281801	2.09911097372827e-07	6.41553105366612e-05	0.00117304576633889	8.75631627076737e-07	0.000107338104964293	0.031968031968032	0.196542114346419	Gentianales
Arecales - Gentianales	metastat	bASV482|Rhizobiaceae	Bacteria	0.000687131102660518	3.3174484287392e-07	8.06523455372818e-05	0.00046274044015498	2.36935018333414e-07	5.58351684039979e-05	0.031968031968032	0.196542114346419	Arecales
Arecales - Gentianales	metastat	bASV659|Acidobacteriales	Bacteria	0.000277333723296173	1.47689789219633e-07	5.38133646968186e-05	0.000485165161392141	4.80445843286224e-07	7.95088412235613e-05	0.031968031968032	0.196542114346419	Gentianales
Arecales - Gentianales	metastat	bASV832|uncultured_bacterium	Bacteria	0.000567662412382327	1.60186596610133e-07	5.60438547837513e-05	0.000393482192886193	2.34616897397346e-07	5.5561357429771e-05	0.032967032967033	0.196542114346419	Arecales
Arecales - Gentianales	metastat	bASV2119|uncultured_bacterium	Bacteria	0.000497959320429875	1.62061972071822e-07	5.63709652826565e-05	0.000340149805179387	1.6358021246471e-07	4.63936549178972e-05	0.032967032967033	0.196542114346419	Arecales
Arecales - Gentianales	metastat	bASV1154|Tumebacillus	Bacteria	0.000594055433307008	2.90654590512451e-07	7.54924474228462e-05	0.000342505113762147	5.02271273991087e-07	8.12947264741958e-05	0.032967032967033	0.196542114346419	Arecales
Arecales - Gentianales	metastat	bASV1033|Acidobacteriales	Bacteria	0.000331923805667256	2.55540967578394e-07	7.0785642664452e-05	0.00060759585772537	7.76832917073299e-07	0.000101101363744336	0.032967032967033	0.196542114346419	Gentianales
Arecales - Gentianales	metastat	bASV1531|Kitasatospora	Bacteria	0.000462110753244996	2.27776557091823e-07	6.6829686530766e-05	0.000273846738509792	2.33400154136515e-07	5.54170971784971e-05	0.032967032967033	0.196542114346419	Arecales
Arecales - Gentianales	metastat	bASV1048|uncultured_bacterium	Bacteria	0.000457395338843291	3.51153806974725e-07	8.29781222022425e-05	0.000255060254534504	1.53890774393631e-07	4.49986512069252e-05	0.032967032967033	0.196542114346419	Arecales
Arecales - Gentianales	metastat	bASV3020|SC-I-84	Bacteria	0.00031887105159024	1.90641909117075e-07	6.11398123104284e-05	0.000163443839527447	1.10054485120967e-07	3.80537163827535e-05	0.032967032967033	0.196542114346419	Arecales
Arecales - Gentianales	metastat	bASV2614|uncultured_bacterium	Bacteria	0.000113433903219306	9.58680417639899e-08	4.33562628092426e-05	0.000277977528404847	3.04591150512548e-07	6.33070161689662e-05	0.032967032967033	0.196542114346419	Gentianales
Arecales - Gentianales	metastat	bASV1756|uncultured_bacterium	Bacteria	0.000147164837356386	8.61733140768943e-08	4.11056300892851e-05	0.000295006110486319	2.52812300125918e-07	5.76756242552759e-05	0.032967032967033	0.196542114346419	Gentianales
Arecales - Gentianales	metastat	bASV3553|Microvirga_ossetica	Bacteria	7.72503285056688e-05	3.88560227618755e-08	2.76022245344911e-05	0.000226151446711097	3.06855682376485e-07	6.35419134753718e-05	0.032967032967033	0.196542114346419	Gentianales
Arecales - Gentianales	metastat	fASV212|Myrmecridium	Fungi	0.00215323433242612	1.95176327032497e-06	0.000195626859213114	0.00101518543951605	1.7703708667577e-06	0.000152624878410991	0.000999000999000999	0.029439347251637	Arecales
Arecales - Gentianales	metastat	fASV129|Pleosporales	Fungi	0.00205199007543814	1.98385928266487e-06	0.000197228805251362	0.00120942142316931	2.12656101515337e-06	0.00016727541955966	0.000999000999000999	0.029439347251637	Arecales
Arecales - Gentianales	metastat	fASV84|Talaromyces	Fungi	0.00101938633141785	2.29914974217494e-06	0.000212323732761145	0.00255641042139866	3.60198867155642e-06	0.000217702980649409	0.000999000999000999	0.029439347251637	Gentianales
Arecales - Gentianales	metastat	fASV166|Periconiaceae	Fungi	0.00222323375128626	1.96169514188119e-06	0.000196123967492811	0.00136689416706535	2.23596755079687e-06	0.00017152441712007	0.000999000999000999	0.029439347251637	Arecales
Arecales - Gentianales	metastat	fASV788|Exophiala	Fungi	0.00218636869760885	1.56253041754594e-06	0.000175036714218561	0.0010769806960072	1.85064970456196e-06	0.000156046960904063	0.000999000999000999	0.029439347251637	Arecales
Arecales - Gentianales	metastat	fASV130|Hypocreales	Fungi	0.00142860352829534	2.09580443900181e-06	0.000202717055736092	0.000553639033552711	1.37225130846206e-06	0.000134372386557795	0.000999000999000999	0.029439347251637	Arecales
Arecales - Gentianales	metastat	fASV143|Nectriaceae	Fungi	0.00178763057718495	1.99253024418836e-06	0.000197659354633879	0.00073905759216172	2.63063081539539e-06	0.000186047207343904	0.000999000999000999	0.029439347251637	Arecales
Arecales - Gentianales	metastat	fASV61|Didymellaceae	Fungi	0.000299525530452987	5.88379787748877e-07	0.000107409769496593	0.0010251883478555	1.91980724827853e-06	0.000158935904338433	0.000999000999000999	0.029439347251637	Gentianales
Arecales - Gentianales	metastat	fASV542|Plectosphaerellaceae	Fungi	0.000271183963250489	4.7797191299701e-07	9.6809081671396e-05	0.00107746527012281	1.76525042296965e-06	0.000152404000110235	0.000999000999000999	0.029439347251637	Gentianales
Arecales - Gentianales	metastat	fASV14|Didymellaceae	Fungi	0.0003083279530666	7.60659931155507e-07	0.000122126576185908	0.00113394937453448	2.67455354668981e-06	0.000187593960551485	0.000999000999000999	0.029439347251637	Gentianales
Arecales - Gentianales	metastat	fASV1609|Pleosporales	Fungi	0.000959393613593677	1.21428854899796e-06	0.000154303530070173	0.000356769860071945	5.93586380943129e-07	8.83761682676543e-05	0.000999000999000999	0.029439347251637	Arecales
Arecales - Gentianales	metastat	fASV523|Clavicipitaceae	Fungi	0.00021325797311915	4.33509058033537e-07	9.21964077852317e-05	0.00089618896677449	1.75255520657436e-06	0.000151854986512166	0.000999000999000999	0.029439347251637	Gentianales
Arecales - Gentianales	metastat	fASV1362|Lecanicillium	Fungi	0.000201069554568859	3.18943578347498e-07	7.90809436834975e-05	0.000938904090057303	1.49037329320997e-06	0.000140036334251713	0.000999000999000999	0.029439347251637	Gentianales
Arecales - Gentianales	metastat	fASV475|Hypocreales	Fungi	0.000275943931208632	5.00130269519768e-07	9.90276520621217e-05	0.000938006862075984	1.75220944277205e-06	0.000151840005943412	0.000999000999000999	0.029439347251637	Gentianales
Arecales - Gentianales	metastat	fASV224|Clavicipitaceae	Fungi	0.00132989422794681	2.16126324242197e-06	0.000205858472343804	0.000458100308680928	1.29130290146113e-06	0.0001303488690047	0.000999000999000999	0.029439347251637	Arecales
Arecales - Gentianales	metastat	fASV1424|Sordariomycetes	Fungi	0.00142805806956992	1.93064259921281e-06	0.000194565508863896	0.000538138246630029	1.13110438635236e-06	0.000121995706694968	0.000999000999000999	0.029439347251637	Arecales
Arecales - Gentianales	metastat	fASV1630|Hypocreales	Fungi	0.000146129915350504	2.64470780540257e-07	7.20118155528711e-05	0.000825240171252618	1.64351634466066e-06	0.00014705514292715	0.000999000999000999	0.029439347251637	Gentianales
Arecales - Gentianales	metastat	fASV1103|Sordariomycetes	Fungi	0.00016613180114888	3.37151938972418e-07	8.13069636180844e-05	0.000915472554899361	1.63074973918826e-06	0.000146482877533082	0.000999000999000999	0.029439347251637	Gentianales
Arecales - Gentianales	metastat	fASV3013|Nectriaceae	Fungi	0.000280348658093127	4.38391211872678e-07	9.27141095796673e-05	0.000799595019497654	1.10035447560402e-06	0.000120326008673149	0.000999000999000999	0.029439347251637	Gentianales
Arecales - Gentianales	metastat	fASV1428|Dictyosporiaceae	Fungi	0.00112000874575694	1.91735196045163e-06	0.000193894653045007	0.000224090243516886	4.48385378538058e-07	7.68102051314984e-05	0.000999000999000999	0.029439347251637	Arecales
Arecales - Gentianales	metastat	fASV1069|Pestalotiopsis	Fungi	0.000321839224042497	5.76410596671622e-07	0.000106311657696551	0.000891379284306694	1.69743476712685e-06	0.000149447877162947	0.000999000999000999	0.029439347251637	Gentianales
Arecales - Gentianales	metastat	fASV708|Periconia	Fungi	9.96885057084863e-05	1.67600431929944e-07	5.73261107962026e-05	0.000790377765803667	1.77190283652611e-06	0.000152690900209942	0.000999000999000999	0.029439347251637	Gentianales
Arecales - Gentianales	metastat	fASV1392|Pleosporales	Fungi	0.00110767173883312	2.12305644795421e-06	0.000204030776607412	0.000341317025842632	6.29947268114521e-07	9.10427363583285e-05	0.000999000999000999	0.029439347251637	Arecales
Arecales - Gentianales	metastat	fASV751|Volutella	Fungi	0.000134188862763472	2.94374632829286e-07	7.59740194020538e-05	0.000642297361388907	1.27662588872559e-06	0.000129605976182346	0.000999000999000999	0.029439347251637	Gentianales
Arecales - Gentianales	metastat	fASV1472|Blastobotrys	Fungi	0.000108183489557302	1.97400412997459e-07	6.22141168327858e-05	0.000586179082686529	1.20685945951403e-06	0.000126014799648485	0.000999000999000999	0.029439347251637	Gentianales
Arecales - Gentianales	metastat	fASV963|Pleosporales	Fungi	0.000861145712941853	1.3928970831937e-06	0.000165262541168899	0.000161318615093349	3.47028637112819e-07	6.75734139865691e-05	0.000999000999000999	0.029439347251637	Arecales
Arecales - Gentianales	metastat	fASV1586|Dothideomycetes	Fungi	0.000129179080279176	2.01959808615979e-07	6.29285010736163e-05	0.000664214672858449	1.43564648173582e-06	0.000137441206652145	0.000999000999000999	0.029439347251637	Gentianales
Arecales - Gentianales	metastat	fASV1532|Ascomycota	Fungi	0.000897096972744795	1.92591368214558e-06	0.000194327078338052	0.000167675347988072	2.46263844610385e-07	5.69237537841057e-05	0.000999000999000999	0.029439347251637	Arecales
Arecales - Gentianales	metastat	fASV249|Hypocreales	Fungi	0.00269926984584511	1.09996676392401e-06	0.000146860395489104	0.00190629970916742	2.3756963071513e-06	0.000176802607266413	0.001998001998002	0.0499576801845962	Arecales
Arecales - Gentianales	metastat	fASV684|Hypocreales_fam_Incertae_sedis	Fungi	0.00137073348768992	2.40795333186917e-06	0.000217289602174427	0.000596609743983444	1.36777978188129e-06	0.000134153279472307	0.001998001998002	0.0499576801845962	Arecales
Arecales - Gentianales	metastat	fASV646|Hypocreales	Fungi	0.00142364762639757	2.42205246162946e-06	0.000217924814415047	0.000631723855895347	1.51496505232504e-06	0.000141186935261331	0.001998001998002	0.0499576801845962	Arecales
Arecales - Gentianales	metastat	fASV2342|Talaromyces	Fungi	0.00145782691427357	2.59113503630421e-06	0.000225403126285547	0.000439623810733597	9.32554645545453e-07	0.000110772089726791	0.001998001998002	0.0499576801845962	Arecales
Arecales - Gentianales	metastat	fASV405|Plectosphaerella	Fungi	8.61760438474259e-05	1.8578372638955e-07	6.035576330808e-05	0.000563312132763197	1.36571892339999e-06	0.000134052175790661	0.001998001998002	0.0499576801845962	Gentianales
Arecales - Gentianales	metastat	fASV664|Trichoderma	Fungi	0.000607526576033887	9.15702347445191e-07	0.000133996074528776	0.00129751687773826	1.63367915329957e-06	0.000146614386514042	0.002997002997003	0.0562023902076707	Gentianales
Arecales - Gentianales	metastat	fASV359|Chaetosphaeriaceae	Fungi	0.00187680291934019	2.09024289364483e-06	0.000202447906329874	0.00101817638685472	3.16199279166313e-06	0.000203973450015822	0.002997002997003	0.0562023902076707	Arecales
Arecales - Gentianales	metastat	fASV851|Herpotrichiellaceae	Fungi	0.00037162760828386	6.93272996235029e-07	0.000116591544125083	0.000987762828515934	1.63218776278219e-06	0.000146547448880729	0.002997002997003	0.0562023902076707	Gentianales
Arecales - Gentianales	metastat	fASV1105|Nectriaceae	Fungi	0.00148383112941715	2.24566697147697e-06	0.000209839666686817	0.000587314878976314	1.52336125921474e-06	0.000141577636281055	0.002997002997003	0.0562023902076707	Arecales
Arecales - Gentianales	metastat	fASV465|Hypocreales	Fungi	0.00139991164697712	2.52627963456506e-06	0.000222564361018096	0.000601251507799201	1.44377194751877e-06	0.0001378296024425	0.002997002997003	0.0562023902076707	Arecales
Arecales - Gentianales	metastat	fASV726|Sordariomycetes	Fungi	0.00121821592727786	2.1748077554786e-06	0.000206502516505513	0.000414352640888037	1.23207600084679e-06	0.000127324492250829	0.002997002997003	0.0562023902076707	Arecales
Arecales - Gentianales	metastat	fASV3373|Meira	Fungi	0.000376647407599989	6.04693528086745e-07	0.000108888639650049	0.00100015224182177	1.98993416954801e-06	0.000161812682865584	0.002997002997003	0.0562023902076707	Gentianales
Arecales - Gentianales	metastat	fASV2338|Westerdykella	Fungi	0.00142649419838635	2.15518923479905e-06	0.000205568996804091	0.000578996042532653	1.37477171860504e-06	0.000134495730640763	0.002997002997003	0.0562023902076707	Arecales
Arecales - Gentianales	metastat	fASV759|Exophiala	Fungi	0.00021738066165857	4.4784854194053e-07	9.37088254094471e-05	0.000738349641243013	1.36634458714301e-06	0.000134082878295037	0.002997002997003	0.0562023902076707	Gentianales
Arecales - Gentianales	metastat	fASV676|Stachybotryaceae	Fungi	0.000229484864827101	4.09102537978903e-07	8.95634880503389e-05	0.000667217266975144	1.36227319627211e-06	0.000133882961273531	0.002997002997003	0.0562023902076707	Gentianales
Arecales - Gentianales	metastat	fASV327|Apiotrichum	Fungi	0.00118919406219191	2.2503374190318e-06	0.000210057761385459	0.000361206079804587	1.06051529570809e-06	0.000118127679346282	0.002997002997003	0.0562023902076707	Arecales
Arecales - Gentianales	metastat	fASV197|Xylaria	Fungi	0.000972685644240915	1.22201213268112e-06	0.000154793482451406	0.00165992031473719	1.98970374103766e-06	0.000161803313878531	0.003996003996004	0.0578457349505851	Gentianales
Arecales - Gentianales	metastat	fASV356|Chaetosphaeriaceae	Fungi	0.00218993394388808	1.73261739088988e-06	0.000184317362224639	0.00136079867220096	3.13793913392414e-06	0.000203196143700591	0.003996003996004	0.0578457349505851	Arecales
Arecales - Gentianales	metastat	fASV124|Rhodotorula	Fungi	0.00196853654527071	3.24596212817042e-06	0.000252282215462437	0.00107545009371243	2.14860621139626e-06	0.000168140222316009	0.003996003996004	0.0578457349505851	Arecales
Arecales - Gentianales	metastat	fASV737|Hypocreales	Fungi	0.000358431873900632	5.58491877516411e-07	0.000104646171108994	0.000902546494198936	1.55725592313566e-06	0.00014314401669278	0.003996003996004	0.0578457349505851	Gentianales
Arecales - Gentianales	metastat	fASV384|Mucor	Fungi	0.00029592073699812	5.45445801676582e-07	0.000103416709090691	0.000830005302608129	1.4402847745331e-06	0.000137663050432507	0.003996003996004	0.0578457349505851	Gentianales
Arecales - Gentianales	metastat	fASV671|Pseudeurotiaceae	Fungi	0.000304946146381508	6.01438103807583e-07	0.000108595137995341	0.000886928454600005	1.69189614674493e-06	0.000149203858544404	0.003996003996004	0.0578457349505851	Gentianales
Arecales - Gentianales	metastat	fASV607|Fungi	Fungi	0.000475698511378779	1.07390713781614e-06	0.00014511031218448	0.00118483813472611	2.37134436329521e-06	0.000176640594193527	0.003996003996004	0.0578457349505851	Gentianales
Arecales - Gentianales	metastat	fASV2189|Xylaria	Fungi	0.000933700015655712	1.31719360903276e-06	0.00016070882261814	0.000351547403303763	6.277567572977e-07	9.08843074070792e-05	0.003996003996004	0.0578457349505851	Arecales
Arecales - Gentianales	metastat	fASV1036|Hypocreales	Fungi	0.000272709615589269	4.83628401195097e-07	9.73802332475891e-05	0.00073751548327304	1.4433673876361e-06	0.000137810290447073	0.003996003996004	0.0578457349505851	Gentianales
Arecales - Gentianales	metastat	fASV205|Hypocreales	Fungi	0.000341796467039298	6.74209800631975e-07	0.000114977389135393	0.000922409738599187	1.86623291357701e-06	0.000156702572510079	0.003996003996004	0.0578457349505851	Gentianales
Arecales - Gentianales	metastat	fASV1452|Diaporthe	Fungi	0.000640935584753482	9.66977466984088e-07	0.000137696559470032	0.000144936989405982	3.17373760830828e-07	6.46217497228893e-05	0.003996003996004	0.0578457349505851	Arecales
Arecales - Gentianales	metastat	fASV1765|Sordariomycetes	Fungi	0.00125173804751221	2.03677261157298e-06	0.0001998417320631	0.00047361690901523	1.06360361706132e-06	0.000118299553824253	0.003996003996004	0.0578457349505851	Arecales
Arecales - Gentianales	metastat	fASV5998|Pleosporales	Fungi	0.000126264496792525	1.91375261337363e-07	6.12572942975298e-05	0.000539597563798287	8.69853347012118e-07	0.000106983357474306	0.003996003996004	0.0578457349505851	Gentianales
Arecales - Gentianales	metastat	fASV29|Fungi	Fungi	0.00240635045652011	1.60961904639006e-06	0.000177654602451932	0.00162778380144646	2.12917892330842e-06	0.000167378350298941	0.004995004995005	0.064398572112956	Arecales
Arecales - Gentianales	metastat	fASV41|Pleosporales	Fungi	0.00256574071631929	1.44532402246383e-06	0.000168343953603855	0.0018998481593478	2.29575640996259e-06	0.000173802535032485	0.004995004995005	0.064398572112956	Arecales
Arecales - Gentianales	metastat	fASV257|Hypocreales	Fungi	0.00206420571254565	1.59811750739914e-06	0.000177018748724487	0.00138180537182311	1.95038915701111e-06	0.000160196801540575	0.004995004995005	0.064398572112956	Arecales
Arecales - Gentianales	metastat	fASV221|Helotiales	Fungi	0.00230420273770213	2.21921934610811e-06	0.000208600347136934	0.00153527631860379	2.43066151151779e-06	0.000178836205253423	0.004995004995005	0.064398572112956	Arecales
Arecales - Gentianales	metastat	fASV377|Fusarium	Fungi	0.00182533718417194	1.95937892847311e-06	0.000196008149514104	0.00103328957234808	2.28961526608636e-06	0.000173569918646726	0.004995004995005	0.064398572112956	Arecales
Arecales - Gentianales	metastat	fASV220|Sordariomycetes	Fungi	0.00110136758763423	1.75735666011131e-06	0.000185628590814219	0.000386232528531088	9.3406275566828e-07	0.000110861622830842	0.004995004995005	0.064398572112956	Arecales
Arecales - Gentianales	metastat	fASV2363|Coprinellus	Fungi	0.00023629296316735	3.67070242359853e-07	8.48378201779497e-05	0.000702727156116389	1.25400573854347e-06	0.000128452619697501	0.004995004995005	0.064398572112956	Gentianales
Arecales - Gentianales	metastat	fASV239|Nectriaceae	Fungi	0.00246187483108936	1.87035045203445e-06	0.000191503363613241	0.00168092616021789	2.51498355061793e-06	0.000181911761092899	0.00599400599400599	0.0668352748415544	Arecales
Arecales - Gentianales	metastat	fASV275|Plectosphaerella	Fungi	0.000573204558668116	8.28250479486904e-07	0.000127437064781544	0.00115118190567437	1.73745980796867e-06	0.000151199580894742	0.00599400599400599	0.0668352748415544	Gentianales
Arecales - Gentianales	metastat	fASV645|Chaetomiaceae	Fungi	0.00138709593477361	1.45260716989971e-06	0.000168767572499711	0.000705932283729848	1.51821184659189e-06	0.000141338146534058	0.00599400599400599	0.0668352748415544	Arecales
Arecales - Gentianales	metastat	fASV318|Hypocreales	Fungi	0.000319080181399118	8.82686413673162e-07	0.000131558263665531	0.00093036754865249	1.84989708848436e-06	0.000156015227347422	0.00599400599400599	0.0668352748415544	Gentianales
Arecales - Gentianales	metastat	fASV3798|Annulohypoxylon	Fungi	0.000197977798184518	3.71072827057002e-07	8.52991077645682e-05	0.000635253380599953	1.01923909713181e-06	0.000115806047992902	0.00599400599400599	0.0668352748415544	Gentianales
Arecales - Gentianales	metastat	fASV952|Staphylotrichum	Fungi	0.000976337204524355	1.90789267684165e-06	0.000193415770634735	0.00033366979947537	9.36306709995769e-07	0.000110994707673489	0.00599400599400599	0.0668352748415544	Arecales
Arecales - Gentianales	metastat	fASV329|Exophiala	Fungi	0.000130744659091778	3.00273180685449e-07	7.67314109423571e-05	0.00059322411070732	1.76615069802879e-06	0.000152442858061842	0.00599400599400599	0.0668352748415544	Gentianales
Arecales - Gentianales	metastat	fASV614|Eurotiomycetes	Fungi	0.00101479799408395	1.86340282263161e-06	0.000191147352185895	0.000380928748447243	8.68356513204254e-07	0.000106891269965291	0.00599400599400599	0.0668352748415544	Arecales
Arecales - Gentianales	metastat	fASV211|Chaetothyriales	Fungi	0.000278251039018524	4.34349644434207e-07	9.22857502260688e-05	0.000740100860622279	1.44240128495549e-06	0.000137764161797363	0.00599400599400599	0.0668352748415544	Gentianales
Arecales - Gentianales	metastat	fASV3315|Xylaria	Fungi	0.000268552249301533	4.70627869687411e-07	9.60624663687707e-05	0.000724347794484022	1.45352597854324e-06	0.00013829440271731	0.00599400599400599	0.0668352748415544	Gentianales
Arecales - Gentianales	metastat	fASV167|Xylariales	Fungi	0.00143935907096137	1.8630958123772e-06	0.000191131605023263	0.00216448722248147	2.2549666800439e-06	0.000172251601476166	0.00699300699300699	0.0686918102538198	Gentianales
Arecales - Gentianales	metastat	fASV170|Sordariales	Fungi	0.00211515649263485	2.05343093515641e-06	0.000200657299069168	0.00146014173223029	1.93529560247452e-06	0.000159575736946546	0.00699300699300699	0.0686918102538198	Arecales
Arecales - Gentianales	metastat	fASV1140|Mycosphaerellaceae	Fungi	0.0012328774748699	1.43742641500388e-06	0.000167883387107667	0.00196294116935237	2.59000937764325e-06	0.000184605175329577	0.00699300699300699	0.0686918102538198	Gentianales
Arecales - Gentianales	metastat	fASV145|Chaetothyriales	Fungi	0.000348525768904905	5.9171655017424e-07	0.000107713904847676	0.000906298136988028	2.46768516629155e-06	0.000180193067740496	0.00699300699300699	0.0686918102538198	Gentianales
Arecales - Gentianales	metastat	fASV347|Pleosporales	Fungi	0.00115093757814126	1.99155962531705e-06	0.000197611205987178	0.000496224808634991	1.10780449493582e-06	0.000120732658934383	0.00699300699300699	0.0686918102538198	Arecales
Arecales - Gentianales	metastat	fASV932|Cladophialophora	Fungi	0.000500797737973631	1.10893161572157e-06	0.000147457645346083	0.00119150620272288	2.75981163817144e-06	0.000190560518021367	0.00699300699300699	0.0686918102538198	Gentianales
Arecales - Gentianales	metastat	fASV832|Hypocreales	Fungi	0.00141712902020078	2.52265240681957e-06	0.000222404524870194	0.000692807935871923	1.68120330490234e-06	0.000148731624468827	0.00699300699300699	0.0686918102538198	Arecales
Arecales - Gentianales	metastat	fASV1166|Nectriaceae	Fungi	0.000294704072843325	4.90390271951523e-07	9.80586331154031e-05	0.000768757065862502	1.29771455617307e-06	0.000130672076315459	0.00699300699300699	0.0686918102538198	Gentianales
Arecales - Gentianales	metastat	fASV1776|Sympoventuriaceae	Fungi	0.0002358122906618	4.39579022223345e-07	9.28396279300129e-05	0.000685964703629812	1.49799274814156e-06	0.000140393842089315	0.00699300699300699	0.0686918102538198	Gentianales
Arecales - Gentianales	metastat	fASV703|Pleosporales	Fungi	0.000869357768910339	1.501602478402e-06	0.000171590168281926	0.0002908046506219	7.5680665257257e-07	9.97896902024037e-05	0.00699300699300699	0.0686918102538198	Arecales
Arecales - Gentianales	metastat	fASV400|Sordariales	Fungi	0.00223353727994932	2.65206345920393e-06	0.00022803781330761	0.00141257471119913	2.9912640560862e-06	0.000198390366651412	0.00799200799200799	0.0766792300507756	Arecales
Arecales - Gentianales	metastat	fASV429|Pleosporales	Fungi	0.000315848476914232	4.93117679091207e-07	9.8330941721452e-05	0.00081231501215821	1.49367217390347e-06	0.000140191230951055	0.00799200799200799	0.0766792300507756	Gentianales
Arecales - Gentianales	metastat	fASV70|Fusarium	Fungi	0.00245425027129696	1.88959872449083e-06	0.000192486247254637	0.00170871963742398	2.9556411845824e-06	0.000197205516116083	0.00899100899100899	0.0833563540158712	Arecales
Arecales - Gentianales	metastat	fASV426|Fusarium	Fungi	0.00137668732045098	2.04555154889679e-06	0.000200271949858029	0.000713404223024278	1.57267448415286e-06	0.000143850913510484	0.00899100899100899	0.0833563540158712	Arecales
Arecales - Gentianales	metastat	fASV2094|Agaricales	Fungi	0.000460633047714763	7.19344864604931e-07	0.000118763636129766	0.000976570381290959	1.86683946342648e-06	0.000156728035623332	0.00899100899100899	0.0833563540158712	Gentianales
Arecales - Gentianales	metastat	fASV72|Hypocreales	Fungi	0.00224424243680861	1.00709855371973e-06	0.00014052412769732	0.00279762822422122	1.79341490645281e-06	0.000153614988066235	0.00999000999000999	0.084112420718963	Gentianales
Arecales - Gentianales	metastat	fASV524|Hypocreales_fam_Incertae_sedis	Fungi	0.00162500328488469	1.85300626665224e-06	0.0001906133683897	0.000931071881426712	1.83308824611775e-06	0.000155304804129685	0.00999000999000999	0.084112420718963	Arecales
Arecales - Gentianales	metastat	fASV127|Hypocreales	Fungi	0.000637138153053512	9.76571542543094e-07	0.000138377966521018	0.00119659765222915	2.13951165738815e-06	0.000167783995590044	0.00999000999000999	0.084112420718963	Gentianales
Arecales - Gentianales	metastat	fASV1659|Meira	Fungi	0.000456350562101028	7.97903075883119e-07	0.000125080607412378	0.000976446093765591	1.86472925153524e-06	0.000156639430554414	0.00999000999000999	0.084112420718963	Gentianales
Arecales - Gentianales	metastat	fASV367|Pleosporales	Fungi	0.00107722506326713	2.09528563478143e-06	0.000202691963468061	0.0004119753691439	1.24706990557196e-06	0.000128096895149725	0.00999000999000999	0.084112420718963	Arecales
Arecales - Gentianales	metastat	fASV265|Clavicipitaceae	Fungi	0.000187559612236179	3.43190133781882e-07	8.20318127889946e-05	0.000602562852727055	1.17960092194035e-06	0.000124583565378316	0.00999000999000999	0.084112420718963	Gentianales
Arecales - Gentianales	metastat	fASV2110|Xylaria	Fungi	0.00014527846196495	2.60292180476411e-07	7.14406624033925e-05	0.000532325239804054	1.06790225424901e-06	0.000118538371216433	0.00999000999000999	0.084112420718963	Gentianales
Arecales - Gentianales	metastat	fASV28|Ciboria	Fungi	0.00088786689106814	1.41527725862768e-06	0.000166584916732865	0.000380405300564832	1.00278556326136e-06	0.000114867518842438	0.00999000999000999	0.084112420718963	Arecales
Arecales - Gentianales	metastat	fASV1068|Pseudohyphozyma	Fungi	0.000281101838652596	4.42448387943832e-07	9.31421418431741e-05	0.000696205777266921	1.15923140792364e-06	0.000123503217938241	0.00999000999000999	0.084112420718963	Gentianales
Arecales - Gentianales	metastat	fASV225|Herpotrichiellaceae	Fungi	0.000870508454333627	1.69063814978472e-06	0.000182070776465741	0.00164482142340765	3.88865928750217e-06	0.000226200286410953	0.010989010989011	0.08977543518321	Gentianales
Arecales - Gentianales	metastat	fASV575|Pleosporales	Fungi	0.000500393551727661	7.89687580531207e-07	0.000124435003943803	0.001022799108405	1.63210534241001e-06	0.000146543748740329	0.010989010989011	0.08977543518321	Gentianales
Arecales - Gentianales	metastat	fASV999|Cyphellophora	Fungi	0.000419264158382031	6.61733208438362e-07	0.00011390856398784	0.000890284474928776	1.36941132879391e-06	0.000134233267544634	0.010989010989011	0.08977543518321	Gentianales
Arecales - Gentianales	metastat	fASV2154|Pleosporales	Fungi	0.000351996357826379	5.45718482719331e-07	0.000103442556069837	0.000788590327701049	1.14592569364594e-06	0.000122792384345431	0.011988011988012	0.096035152199515	Gentianales
Arecales - Gentianales	metastat	fASV1607|Dothideomycetes	Fungi	0.000350250345859183	6.22781849908985e-07	0.000110505243412902	0.000847695274615871	1.70026290656456e-06	0.000149572324811556	0.011988011988012	0.096035152199515	Gentianales
Arecales - Gentianales	metastat	fASV841|Pleosporales	Fungi	0.00072551453643639	1.08502762753701e-06	0.00014585969806747	0.0012352251145685	1.58386974636672e-06	0.000144362015085555	0.012987012987013	0.100148807472859	Gentianales
Arecales - Gentianales	metastat	fASV206|Xylariales	Fungi	0.000697259346120579	1.31267698896086e-06	0.000160433052982946	0.00133205700831801	3.12474889190937e-06	0.00020276862922752	0.012987012987013	0.100148807472859	Gentianales
Arecales - Gentianales	metastat	fASV1882|Diaporthe	Fungi	0.000866207170752185	1.25618113237526e-06	0.000156942672959247	0.00040542021055354	7.94598425627219e-07	0.00010225087991046	0.012987012987013	0.100148807472859	Arecales
Arecales - Gentianales	metastat	fASV3451|Crepidotus	Fungi	0.000733849601313982	9.66004463391921e-07	0.000137627264697359	0.000335892374059632	6.63828564542916e-07	9.34590090658182e-05	0.012987012987013	0.100148807472859	Arecales
Arecales - Gentianales	metastat	fASV39|Metarhizium_anisopliae	Fungi	0.00250248685015244	2.80014169620626e-06	0.000234317603140053	0.00174981638448026	2.59190269640875e-06	0.000184672636975497	0.013986013986014	0.10212587719152	Arecales
Arecales - Gentianales	metastat	fASV76|Clavicipitaceae	Fungi	0.000922445768792442	1.44661214985678e-06	0.000168418954143644	0.00153831455702826	2.12433654726952e-06	0.000167187908278676	0.013986013986014	0.10212587719152	Gentianales
Arecales - Gentianales	metastat	fASV23|Talaromyces	Fungi	0.000725516223028318	1.4060602274186e-06	0.000166041586299207	0.0014012106685208	3.53466654429588e-06	0.00021565892126152	0.013986013986014	0.10212587719152	Gentianales
Arecales - Gentianales	metastat	fASV2473|Xylaria	Fungi	0.000348134300636356	6.02641729898152e-07	0.000108703746521483	0.000786081937302178	1.3551821878369e-06	0.000133534057741092	0.013986013986014	0.10212587719152	Gentianales
Arecales - Gentianales	metastat	fASV758|Hypocreales	Fungi	0.000205865181235375	3.2642659008405e-07	8.00032585223693e-05	0.000619123394721474	1.41644530525105e-06	0.000136519003171674	0.013986013986014	0.10212587719152	Gentianales
Arecales - Gentianales	metastat	fASV3834|Nectriaceae	Fungi	0.000148426275112639	2.09039862634459e-07	6.40220339880716e-05	0.000452583276029782	8.21620281389592e-07	0.000103974964179743	0.013986013986014	0.10212587719152	Gentianales
Arecales - Gentianales	metastat	fASV119|Nectriaceae	Fungi	0.00170177776642333	3.16188469348386e-06	0.000248993451897673	0.0009716652101754	2.17946739200674e-06	0.00016934344547813	0.014985014985015	0.108460753032347	Arecales
Arecales - Gentianales	metastat	fASV96|Bionectriaceae	Fungi	0.002298321887014	1.99678947349547e-06	0.00019787050001054	0.00159719244220376	2.84326546306767e-06	0.000193420235942217	0.015984015984016	0.112725021954986	Arecales
Arecales - Gentianales	metastat	fASV56|Mortierella	Fungi	0.000751561820102054	1.70032368685679e-06	0.00018259156643845	0.00143625378957303	2.81887741343878e-06	0.000192588920455174	0.015984015984016	0.112725021954986	Gentianales
Arecales - Gentianales	metastat	fASV3349|Fungi	Fungi	0.000751022300639238	1.39142438553474e-06	0.000165175152758871	0.000264832201417523	7.30502776658884e-07	9.8040188903574e-05	0.015984015984016	0.112725021954986	Arecales
Arecales - Gentianales	metastat	fASV1911|Psathyrellaceae	Fungi	0.000507666859699642	7.30530057534563e-07	0.000119683410609773	0.000945115973960407	1.4573196650486e-06	0.000138474758532519	0.016983016983017	0.116776077431494	Gentianales
Arecales - Gentianales	metastat	fASV838|Ascomycota	Fungi	0.00104902550301009	1.8267918314044e-06	0.000189260264383721	0.00049620461378164	1.27785657034163e-06	0.000129668431938299	0.016983016983017	0.116776077431494	Arecales
Arecales - Gentianales	metastat	fASV3001|Hypocreales	Fungi	0.000861790876513968	1.13910429763333e-06	0.000149450253880571	0.000440964701558353	8.6400343977932e-07	0.000106623010241157	0.016983016983017	0.116776077431494	Arecales
Arecales - Gentianales	metastat	fASV328|Sordariomycetes	Fungi	0.00181773085650192	2.92493083717454e-06	0.000239481909635442	0.0011320605714812	2.4805212971857e-06	0.000180661114025306	0.017982017982018	0.11965670173246	Arecales
Arecales - Gentianales	metastat	fASV1342|Coprinopsis	Fungi	0.000741226332327155	8.94916448196299e-07	0.000132466529120311	0.00123496212967513	1.55217280754052e-06	0.000142910204026888	0.017982017982018	0.11965670173246	Gentianales
Arecales - Gentianales	metastat	fASV3390|Bionectriaceae	Fungi	0.000286890696714308	4.64461168464417e-07	9.54310312979819e-05	0.000652702075831541	1.14178109196753e-06	0.000122570124502773	0.017982017982018	0.11965670173246	Gentianales
Arecales - Gentianales	metastat	fASV1751|Hypocreales	Fungi	0.00105143981198039	1.69315892556757e-06	0.000182206461518169	0.000504455813298167	1.34207004611152e-06	0.000132886479358151	0.017982017982018	0.11965670173246	Arecales
Arecales - Gentianales	metastat	fASV2374|Pleosporales	Fungi	0.000141163347394348	2.42246979533529e-07	6.89198140970159e-05	0.000431600949606528	7.44252629202609e-07	9.89585658377581e-05	0.018981018981019	0.125293861902967	Gentianales
Arecales - Gentianales	metastat	fASV27|Pleosporales	Fungi	0.00220428823152999	2.35191680518357e-06	0.000214746398777519	0.00148741361810955	3.3123985203325e-06	0.000208768271193222	0.01998001998002	0.130841543340609	Arecales
Arecales - Gentianales	metastat	fASV810|Nectriaceae	Fungi	0.00145433484326273	1.64906550120717e-06	0.000179818290701277	0.000898610706108397	1.46755562857467e-06	0.000138960219060153	0.020979020979021	0.135237001437208	Arecales
Arecales - Gentianales	metastat	fASV3580|Thelephoraceae	Fungi	0.000305042443905224	4.63185338315347e-07	9.52998712337202e-05	0.000683118676042562	1.22947366240482e-06	0.000127189956488877	0.020979020979021	0.135237001437208	Gentianales
Arecales - Gentianales	metastat	fASV12|Lophiostoma	Fungi	0.00307367172592128	1.12767307335662e-06	0.000148698475891593	0.00247639402910615	3.16783244045125e-06	0.000204161714813065	0.021978021978022	0.136350660954951	Arecales
Arecales - Gentianales	metastat	fASV294|Chaetomium	Fungi	0.00174511423655709	2.56817633095986e-06	0.00022440231426229	0.00111133898830765	2.1109183242215e-06	0.000166659056484121	0.021978021978022	0.136350660954951	Arecales
Arecales - Gentianales	metastat	fASV238|Hypocreales	Fungi	0.00128332244267647	1.73591990791168e-06	0.00018449294093046	0.000755583401995413	1.46259647509716e-06	0.000138725233688053	0.021978021978022	0.136350660954951	Arecales
Arecales - Gentianales	metastat	fASV1187|Candida	Fungi	0.00082070441422464	1.47150898242965e-06	0.000169862053745215	0.00136366787449932	2.6338813068167e-06	0.000186162114793613	0.021978021978022	0.136350660954951	Gentianales
Arecales - Gentianales	metastat	fASV2262|Xylaria	Fungi	0.000290946005636958	6.26281709746606e-07	0.000110815312680348	0.000689367950782015	1.12880561315696e-06	0.000121871676103498	0.021978021978022	0.136350660954951	Gentianales
Arecales - Gentianales	metastat	fASV151|Sordariomycetes	Fungi	0.00160146514161371	1.79029071541491e-06	0.000187359919721213	0.00223497751581577	2.55540610652199e-06	0.000183367839490735	0.022977022977023	0.13838642065733	Gentianales
Arecales - Gentianales	metastat	fASV103|Clavicipitaceae	Fungi	0.0012200907029293	2.18269252114173e-06	0.000206876515272775	0.000621021568107649	1.7606761541443e-06	0.000152206410843626	0.022977022977023	0.13838642065733	Arecales
Arecales - Gentianales	metastat	fASV189|Schizoparmaceae	Fungi	0.00046877292888969	9.02815504251228e-07	0.000133049858283426	0.00105625027431796	3.29213958784427e-06	0.000208128869107209	0.022977022977023	0.13838642065733	Gentianales
Arecales - Gentianales	metastat	fASV457|Mortierella	Fungi	0.00130854445693881	2.10677199713959e-06	0.000203246783113225	0.000705996504614475	1.92425214000478e-06	0.00015911978854098	0.022977022977023	0.13838642065733	Arecales
Arecales - Gentianales	metastat	fASV20|Sordariomycetes	Fungi	0.00106504645065727	1.63445884999686e-06	0.000179020146198791	0.00164426014516674	2.76793447560659e-06	0.000190840746352837	0.023976023976024	0.139240155919905	Gentianales
Arecales - Gentianales	metastat	fASV748|Hypocreales	Fungi	0.000562104516565235	8.4156462545627e-07	0.000128457258128177	0.0010290902491207	1.37886416691919e-06	0.000134695766691928	0.023976023976024	0.139240155919905	Gentianales
Arecales - Gentianales	metastat	fASV446|Dictyosporiaceae	Fungi	0.00142465055797162	2.41730945481484e-06	0.000217711333201128	0.000820577880192741	1.86958620386054e-06	0.000156843292721905	0.023976023976024	0.139240155919905	Arecales
Arecales - Gentianales	metastat	fASV484|Pseudeurotiaceae	Fungi	0.000141962195893555	2.48712374572382e-07	6.98334678138603e-05	0.00047666132565956	1.19010889263943e-06	0.00012513723480535	0.023976023976024	0.139240155919905	Gentianales
Arecales - Gentianales	metastat	fASV518|Pestalotiopsis	Fungi	0.00225391161345489	2.35348505707154e-06	0.000214817983011042	0.0015989855913261	2.73490913418305e-06	0.000189698831051772	0.024975024975025	0.139240155919905	Arecales
Arecales - Gentianales	metastat	fASV163|Helotiales	Fungi	0.00106118726158364	1.72976020551406e-06	0.000184165324572205	0.00174527791519187	3.55888770315867e-06	0.000216396556761894	0.024975024975025	0.139240155919905	Gentianales
Arecales - Gentianales	metastat	fASV86|Helotiales	Fungi	0.000626251079847607	1.2266860569388e-06	0.000155089225232167	0.00115189196869012	2.30058552814976e-06	0.000173985235616407	0.024975024975025	0.139240155919905	Gentianales
Arecales - Gentianales	metastat	fASV1850|Ramichloridium	Fungi	0.00102630054568836	2.13273262772687e-06	0.000204495199988102	0.000485056696119772	9.40385798349536e-07	0.000111236223177095	0.024975024975025	0.139240155919905	Arecales
Arecales - Gentianales	metastat	fASV1390|Hypocreales	Fungi	0.000396991094490231	6.8658867595066e-07	0.000116028113221995	0.000819432578427588	1.31765579177714e-06	0.000131672230206653	0.024975024975025	0.139240155919905	Gentianales
Arecales - Gentianales	metastat	fASV186|Sordariales	Fungi	0.000201162629154798	3.98522758141602e-07	8.83978038656318e-05	0.000560324811114985	1.17137176081376e-06	0.000124148243348413	0.024975024975025	0.139240155919905	Gentianales
Arecales - Gentianales	metastat	fASV4502|Pleosporales	Fungi	0.000554305140910895	8.73595158600627e-07	0.000130879016023603	0.000199674611146255	3.65007276854718e-07	6.93017122951212e-05	0.024975024975025	0.139240155919905	Arecales
Arecales - Gentianales	metastat	fASV191|Herpotrichiellaceae	Fungi	0.00129537998692416	1.94064014028089e-06	0.00019506862242936	0.00196782013396176	3.27098755096264e-06	0.000207459176420537	0.025974025974026	0.140998978942051	Gentianales
Arecales - Gentianales	metastat	fASV232|Sordariomycetes	Fungi	0.00052080381751522	8.36734693274899e-07	0.000128088104885791	0.000982136370751748	1.73845408062506e-06	0.000151242837178156	0.025974025974026	0.140998978942051	Gentianales
Arecales - Gentianales	metastat	fASV579|Cyberlindnera	Fungi	0.000946590342476333	1.78887103042553e-06	0.000187285617593459	0.000486532935384849	7.53506001541363e-07	9.95718466829858e-05	0.025974025974026	0.140998978942051	Arecales
Arecales - Gentianales	metastat	fASV2209|Nectriaceae	Fungi	0.000311989651174705	5.43055179740653e-07	0.000103189828855505	0.000678891767651036	1.14133462641953e-06	0.000122546158136195	0.025974025974026	0.140998978942051	Gentianales
Arecales - Gentianales	metastat	fASV1480|Xylariaceae	Fungi	0.000649061847671574	8.87179985639667e-07	0.000131892706367466	0.00109869375057382	1.53788667677698e-06	0.000142251014092074	0.026973026973027	0.144520431962582	Gentianales
Arecales - Gentianales	metastat	fASV80|Fusarium_oxysporum	Fungi	0.00164528055803673	4.12515434526275e-06	0.000284403550116516	0.000907335518689499	2.20201555376766e-06	0.000170217181463458	0.026973026973027	0.144520431962582	Arecales
Arecales - Gentianales	metastat	fASV1414|Sporocadaceae	Fungi	0.000831008857569809	1.34552548774572e-06	0.000162427992356295	0.00143195896233068	2.78218457420271e-06	0.000191331366393033	0.028971028971029	0.15323557672006	Gentianales
Arecales - Gentianales	metastat	fASV815|Plectosphaerellaceae	Fungi	0.00107042199816856	1.5460056486104e-06	0.000174108690901008	0.000588811484216578	1.10572876102682e-06	0.000120619495294458	0.028971028971029	0.15323557672006	Arecales
Arecales - Gentianales	metastat	fASV43|Didymellaceae	Fungi	0.00188208163584617	1.63915667198744e-06	0.000179277234755879	0.0013693170662326	2.0545924716202e-06	0.000164420532381716	0.02997002997003	0.153596594356367	Arecales
Arecales - Gentianales	metastat	fASV944|Hypocreales	Fungi	0.000402862578466325	6.14298605389355e-07	0.000109750037329875	0.000775795455908097	1.33479729940908e-06	0.000132525930898997	0.02997002997003	0.153596594356367	Gentianales
Arecales - Gentianales	metastat	fASV2141|Diaporthe	Fungi	0.000999612845882262	1.36116150358793e-06	0.000163369033928778	0.000548212895071462	9.04823561299502e-07	0.000109112662761906	0.02997002997003	0.153596594356367	Arecales
Arecales - Gentianales	metastat	fASV793|Nectriaceae	Fungi	0.00074641434795265	1.88285621386756e-06	0.000192142523381788	0.00028637230103787	5.62844997534324e-07	8.60572787782346e-05	0.02997002997003	0.153596594356367	Arecales
Arecales - Gentianales	metastat	fASV4445|Hypoxylon	Fungi	0.00041691624314919	5.87561247164189e-07	0.000107335030478988	0.000764838424125616	1.02970736754271e-06	0.000116399231749517	0.02997002997003	0.153596594356367	Gentianales
Arecales - Gentianales	metastat	fASV1450|Nectriaceae	Fungi	0.00139739050209892	2.19831092664895e-06	0.000207615355445222	0.000846467003937918	1.24007869456933e-06	0.000127737327858946	0.032967032967033	0.167913313953782	Arecales
Arecales - Gentianales	metastat	fASV2532|Penicillium	Fungi	0.000377834861286916	8.64682674087063e-07	0.000130209685649729	0.000797908555857341	1.23353067129287e-06	0.000127399633938005	0.033966033966034	0.170891820631454	Gentianales
Arecales - Gentianales	metastat	fASV1333|Nectriaceae	Fungi	0.000388948395981983	6.64567327722568e-07	0.000114152231323478	0.000794353370804331	1.55966503113751e-06	0.000143254697320684	0.033966033966034	0.170891820631454	Gentianales
Arecales - Gentianales	metastat	fASV171|Volutella	Fungi	0.000623706903884289	1.26312452883784e-06	0.000157375816516615	0.00114008382125669	2.10161037019894e-06	0.000166291214527207	0.034965034965035	0.171729525634549	Gentianales
Arecales - Gentianales	metastat	fASV383|Helotiales	Fungi	0.000285716121100851	4.62062764084746e-07	9.51843169736491e-05	0.00065990668169898	1.76328571567409e-06	0.000152319164381298	0.034965034965035	0.171729525634549	Gentianales
Arecales - Gentianales	metastat	fASV1972|Nectriaceae	Fungi	0.000681931402768393	1.1739718141551e-06	0.000151720318940845	0.00029793908045738	7.47675042073124e-07	9.91858331666482e-05	0.034965034965035	0.171729525634549	Arecales
Arecales - Gentianales	metastat	fASV1203|Hypocreales	Fungi	0.00028083015802614	5.14260916623735e-07	0.000100416868029127	0.000639849715864413	1.22898838070256e-06	0.000127164852636592	0.034965034965035	0.171729525634549	Gentianales
Arecales - Gentianales	metastat	fASV141|Hypocreales	Fungi	0.00113836848155662	1.49275719235304e-06	0.000171084040371004	0.00163741191821739	2.00062306181443e-06	0.000162246687656337	0.035964035964036	0.175590899583729	Gentianales
Arecales - Gentianales	metastat	fASV138|Curvularia	Fungi	0.00193384083210242	2.9007493301099e-06	0.000238489911411976	0.00130369115127791	2.67498994535122e-06	0.000187609264491502	0.036963036963037	0.178357682764304	Arecales
Arecales - Gentianales	metastat	fASV3975|Zasmidium	Fungi	0.000328270348938562	5.41056064280429e-07	0.000102999720566957	0.000675493220662104	1.31215836447315e-06	0.000131397266477673	0.036963036963037	0.178357682764304	Gentianales
Arecales - Gentianales	metastat	fASV842|Hypocreales	Fungi	0.000318934843251017	5.04226632091909e-07	9.943237253372e-05	0.000709415193307363	2.00262929393788e-06	0.000162328018057731	0.037962037962038	0.181060494079432	Gentianales
Arecales - Gentianales	metastat	fASV3740|Fusarium	Fungi	0.000209005449299102	3.39037399416092e-07	8.15339938026684e-05	0.00048019307149746	7.91792375358532e-07	0.000102070175508822	0.037962037962038	0.181060494079432	Gentianales
Arecales - Gentianales	metastat	fASV1870|Ganoderma	Fungi	0.000472472625146183	7.61494566414502e-07	0.000122193559601673	0.000874416136750382	1.51299598933425e-06	0.00014109515216663	0.038961038961039	0.183701526850215	Gentianales
Arecales - Gentianales	metastat	fASV1856|Hypocreales	Fungi	0.000637338187235953	1.06163181286377e-06	0.000144278584884079	0.000271455492069427	6.02644441942533e-07	8.90479204182939e-05	0.038961038961039	0.183701526850215	Arecales
Arecales - Gentianales	metastat	fASV1421|Pleosporales	Fungi	0.000893735640700827	1.86437632560139e-06	0.000191197276500487	0.000444979799177528	7.5977001039403e-07	9.99848679599772e-05	0.03996003996004	0.186282875264596	Arecales
Arecales - Gentianales	metastat	fASV1446|Plectosphaerella	Fungi	0.000197671190002352	3.11217699684143e-07	7.81172697740005e-05	0.000501322801985458	9.78160696913234e-07	0.000113448382472825	0.03996003996004	0.186282875264596	Gentianales
Arecales - Gentianales	metastat	fASV199|Clavicipitaceae	Fungi	0.00166935705014982	2.05996558119966e-06	0.000200976321949395	0.00114431692104094	1.9718686006879e-06	0.0001610765019571	0.040959040959041	0.186720279805963	Arecales
Arecales - Gentianales	metastat	fASV1912|Periconiaceae	Fungi	0.000757977026057595	1.36829485519639e-06	0.000163796553340428	0.000380448421823675	7.71971831130173e-07	0.000100784542931037	0.040959040959041	0.186720279805963	Arecales
Arecales - Gentianales	metastat	fASV2038|Cyphellophora	Fungi	0.000258260820575599	4.36414610838828e-07	9.25048605865329e-05	0.000568637847462373	9.82712952264875e-07	0.000113712064366243	0.040959040959041	0.186720279805963	Gentianales
Arecales - Gentianales	metastat	fASV5250|Chaetothyriales	Fungi	0.000241924972797068	4.62637523407332e-07	9.52434984047681e-05	0.000573541973803106	1.02283561543806e-06	0.000116010186453721	0.040959040959041	0.186720279805963	Gentianales
Arecales - Gentianales	metastat	fASV743|Gongronella	Fungi	0.000750175939362346	1.40672853601988e-06	0.000166081041877085	0.000353434838880257	7.77996753579677e-07	0.00010117706948319	0.041958041958042	0.18918400201052	Arecales
Arecales - Gentianales	metastat	fASV2516|Fungi	Fungi	0.000287356583993231	4.91923747240477e-07	9.82118306080377e-05	0.000570112997637774	8.99827636983287e-07	0.000108811016577953	0.041958041958042	0.18918400201052	Gentianales
Arecales - Gentianales	metastat	fASV69|Mortierella	Fungi	0.000674316307676709	1.07620398420143e-06	0.000145265408497379	0.00113666665818659	2.33799236330474e-06	0.000175394006202904	0.042957042957043	0.191594454545789	Gentianales
Arecales - Gentianales	metastat	fASV1597|Chaetothyriales	Fungi	0.000441952177026082	7.50670536076243e-07	0.000121322010035863	0.000824620100103555	1.60879641565809e-06	0.000145493552744574	0.042957042957043	0.191594454545789	Gentianales
Arecales - Gentianales	metastat	fASV608|Meripilaceae	Fungi	0.00147940179946555	1.35681153146178e-06	0.000163107779323125	0.00191461926720823	1.4414589780581e-06	0.000137719154443979	0.043956043956044	0.191900930232893	Gentianales
Arecales - Gentianales	metastat	fASV967|Pleosporales	Fungi	0.00138000471384594	1.59675965712565e-06	0.000176943530214633	0.00090251511398764	1.32339481451293e-06	0.000131958666500703	0.043956043956044	0.191900930232893	Arecales
Arecales - Gentianales	metastat	fASV2280|Pleosporales	Fungi	0.000752137882510734	1.16844952012253e-06	0.00015136305660353	0.000373598716752104	7.22384848054797e-07	9.74939166830152e-05	0.043956043956044	0.191900930232893	Arecales
Arecales - Gentianales	metastat	fASV1775|Tetraplosphaeria	Fungi	0.000993484831509707	2.07002992822662e-06	0.000201466677448383	0.000526115849491329	1.21233154672475e-06	0.000126300161828706	0.043956043956044	0.191900930232893	Arecales
Arecales - Gentianales	metastat	fASV580|Sympoventuriaceae	Fungi	0.000661259041883088	1.02069427676162e-06	0.000141469478227057	0.00104326137845285	1.72968586527673e-06	0.000150860944392891	0.045954045954046	0.199567785579519	Gentianales
Arecales - Gentianales	metastat	pASV2|Trinematidae_X_sp.	Protist	0.00367287001181851	1.11524270941214e-06	0.000147876651659822	0.00453329436619052	1.72352134198627e-06	0.000150591873600657	0.000999000999000999	0.042617610830142	Gentianales
Arecales - Gentianales	metastat	pASV4|Leidyana1_sp.	Protist	0.00322002256888604	1.71387787345746e-06	0.000183317889195697	0.00421722350848719	1.62780280986098e-06	0.000146350463014254	0.000999000999000999	0.042617610830142	Gentianales
Arecales - Gentianales	metastat	pASV90|Tracheleuglypha_dentata	Protist	0.00138043824706936	2.29433154195043e-06	0.000212101138562291	0.00245570891292038	3.79733295632228e-06	0.000223528314358673	0.000999000999000999	0.042617610830142	Gentianales
Arecales - Gentianales	metastat	pASV38|Leidyana1_sp.	Protist	0.00108773206906256	2.31998306530244e-06	0.000213283529663071	0.00247978504353861	4.03784532858002e-06	0.000230498468101429	0.000999000999000999	0.042617610830142	Gentianales
Arecales - Gentianales	metastat	pASV569|Protist	Protist	0.00249683028121563	1.52747219122965e-06	0.000173061940131705	0.00146767779724284	2.69397755097908e-06	0.000188273930853951	0.000999000999000999	0.042617610830142	Arecales
Arecales - Gentianales	metastat	pASV61|Amoebogregarina_sp.	Protist	0.000731281698948852	2.056543991216e-06	0.000200809342373874	0.00214042963468726	3.96052831131846e-06	0.000228280999258833	0.000999000999000999	0.042617610830142	Gentianales
Arecales - Gentianales	metastat	pASV657|Endostelium_zonatum	Protist	0.000650591990767609	1.21988110763457e-06	0.000154658454035333	0.00161815566421522	3.15968686172392e-06	0.000203899061125711	0.000999000999000999	0.042617610830142	Gentianales
Arecales - Gentianales	metastat	pASV889|Protist	Protist	0.00149349270771879	2.30684132221285e-06	0.000212678590338772	0.000608984072565786	1.35870829133768e-06	0.000133707668723585	0.000999000999000999	0.042617610830142	Arecales
Arecales - Gentianales	metastat	pASV113|Amoebogregarina_sp.	Protist	0.000322517813983373	7.55954970140313e-07	0.000121748291459632	0.00139724821503874	3.874756745776e-06	0.000225795574340574	0.000999000999000999	0.042617610830142	Gentianales
Arecales - Gentianales	metastat	pASV1062|Rhynchobodo_sp.	Protist	0.00135865203011191	2.06909919063544e-06	0.00020142138010996	0.000551351209118521	1.54686239658164e-06	0.000142665526973409	0.000999000999000999	0.042617610830142	Arecales
Arecales - Gentianales	metastat	pASV1528|Kinetoplastea_XXX_sp.	Protist	0.00127448639327616	1.7153313071091e-06	0.000183395602995867	0.00043947426029175	1.01452076971248e-06	0.000115537688639754	0.000999000999000999	0.042617610830142	Arecales
Arecales - Gentianales	metastat	pASV1242|Hartmannellidae_X_sp.	Protist	0.000102269046894214	1.79435910206843e-07	5.93156908458995e-05	0.00064045989213788	1.56526476525066e-06	0.000143511633732099	0.000999000999000999	0.042617610830142	Gentianales
Arecales - Gentianales	metastat	pASV552|Thaumatomonadida	Protist	0.000195384087419992	3.69758644970964e-07	8.51479272163133e-05	0.000782026245422304	2.03158443736817e-06	0.00016349732161689	0.000999000999000999	0.042617610830142	Gentianales
Arecales - Gentianales	metastat	pASV115|Allapsidae	Protist	0.00290278914120415	3.39978093780184e-06	0.000258190571728419	0.00182372239533005	3.6703025954242e-06	0.000219757719325056	0.001998001998002	0.0461690783993205	Arecales
Arecales - Gentianales	metastat	pASV441|Cyrtolophosidida	Protist	0.000617702086792512	1.26423045862478e-06	0.000157444696709843	0.00140457150818758	2.3513938797209e-06	0.000175895972535537	0.001998001998002	0.0461690783993205	Gentianales
Arecales - Gentianales	metastat	pASV885|Opisthokonta	Protist	0.00211987651717824	1.45576405861861e-06	0.000168950860625944	0.0011241445181922	2.34858027627275e-06	0.000175790705261173	0.001998001998002	0.0461690783993205	Arecales
Arecales - Gentianales	metastat	pASV1085|Protist	Protist	0.00188369726131841	1.82456602614349e-06	0.000189144929707846	0.00101714772838523	2.02303152672373e-06	0.000163152799172873	0.001998001998002	0.0461690783993205	Arecales
Arecales - Gentianales	metastat	pASV521|Eupetalomonads_XX_sp.	Protist	0.000704547966086923	1.1809278805296e-06	0.000152169144828495	0.00152893210143274	2.24447165907169e-06	0.000171850289001476	0.001998001998002	0.0461690783993205	Gentianales
Arecales - Gentianales	metastat	pASV631|Filamoeba_sp.	Protist	0.00185974413199702	2.85402932237999e-06	0.000236561533775787	0.000909163384513748	2.08364342222816e-06	0.00016557886585791	0.001998001998002	0.0461690783993205	Arecales
Arecales - Gentianales	metastat	pASV1117|Kinetoplastea_XXX_sp.	Protist	0.000600876885731708	1.1743304578053e-06	0.000151743492143641	0.00153577950580438	3.46612198981723e-06	0.000213557646285655	0.001998001998002	0.0461690783993205	Gentianales
Arecales - Gentianales	metastat	pASV244|Cercomonas	Protist	0.000275894162954483	7.72224154387921e-07	0.00012305141236913	0.000932275349498869	2.32398362135416e-06	0.000174867755346499	0.001998001998002	0.0461690783993205	Gentianales
Arecales - Gentianales	metastat	pASV1216|Naegleria_sp.	Protist	0.00171379293468585	3.89625353564289e-06	0.000276400304178307	0.000749349843241125	1.81595690157906e-06	0.00015457739083585	0.001998001998002	0.0461690783993205	Arecales
Arecales - Gentianales	metastat	pASV238|Chlorellales_X	Protist	0.0014809996467769	2.57335664844607e-06	0.000224628523342301	0.000353638718396695	1.15834024907292e-06	0.000123455737277572	0.001998001998002	0.0461690783993205	Arecales
Arecales - Gentianales	metastat	pASV269|Protist	Protist	0.000165935856365705	5.03713554372538e-07	9.93817707642898e-05	0.000800394813230837	2.28049195669778e-06	0.000173223766020845	0.001998001998002	0.0461690783993205	Gentianales
Arecales - Gentianales	metastat	pASV85|Cercozoa	Protist	0.00169426925688814	2.58269401419309e-06	0.000225035684063273	0.0027034889895773	4.3811686649185e-06	0.00024009780531556	0.002997002997003	0.0554028940791846	Gentianales
Arecales - Gentianales	metastat	pASV166|Pseudodifflugiidae_X_sp.	Protist	0.0024212836045937	2.33697710383471e-06	0.000214063262769087	0.00153008700539978	2.93992972173476e-06	0.000196680669645747	0.002997002997003	0.0554028940791846	Arecales
Arecales - Gentianales	metastat	pASV185|Trebouxiophyceae	Protist	0.00233207998962947	2.60074189750932e-06	0.000225820590661811	0.00125997175856764	3.02921482827182e-06	0.000199644909390853	0.002997002997003	0.0554028940791846	Arecales
Arecales - Gentianales	metastat	pASV1111|Paracercomonas	Protist	0.000482578786773968	9.13970782474005e-07	0.000133869323352232	0.00117964183515417	2.91462375712423e-06	0.000195832358392937	0.002997002997003	0.0554028940791846	Gentianales
Arecales - Gentianales	metastat	pASV582|Colpodella_sp.	Protist	0.00036819177549255	6.80820065835287e-07	0.000115539660098141	0.000989497888147441	2.11195044259753e-06	0.000166699794880274	0.002997002997003	0.0554028940791846	Gentianales
Arecales - Gentianales	metastat	pASV1473|Protist	Protist	0.00134319512150993	1.66341833955088e-06	0.00018059913032334	0.000625318296745504	1.66949872411283e-06	0.000148212983490546	0.002997002997003	0.0554028940791846	Arecales
Arecales - Gentianales	metastat	pASV92|Amoebozoa	Protist	0.00270749905482052	2.13242369434408e-06	0.000204480388548301	0.00175797343982367	3.228796410325e-06	0.000206116868047596	0.003996003996004	0.0598950206261455	Arecales
Arecales - Gentianales	metastat	pASV119|Proleptomonas_faecicola	Protist	0.00145572419583615	2.19434720158989e-06	0.00020742809770484	0.00234472084617617	3.41141892383447e-06	0.000211865738388927	0.003996003996004	0.0598950206261455	Gentianales
Arecales - Gentianales	metastat	pASV361|Protist	Protist	0.00228890004931965	2.22106308716843e-06	0.000208686982371076	0.00143135702047412	2.91755444482046e-06	0.000195930789499643	0.003996003996004	0.0598950206261455	Arecales
Arecales - Gentianales	metastat	pASV335|Cercomonadidae	Protist	0.000752858777572935	1.52205015014887e-06	0.000172754509611629	0.00152770894468052	3.09071876313228e-06	0.000201661479084324	0.003996003996004	0.0598950206261455	Gentianales
Arecales - Gentianales	metastat	pASV442|Dimastigella_trypaniformis	Protist	0.00176163384611573	2.15857072346879e-06	0.000205730202319559	0.000950647654913679	2.01571183688172e-06	0.000162857373703177	0.003996003996004	0.0598950206261455	Arecales
Arecales - Gentianales	metastat	pASV1725|Bicoecaceae_X_sp.	Protist	0.00133192766157476	1.89647967490149e-06	0.00019283639692356	0.000627283884308909	1.47796132248127e-06	0.000139451997139993	0.003996003996004	0.0598950206261455	Arecales
Arecales - Gentianales	metastat	pASV1329|Eupetalomonads_XX_sp.	Protist	0.000215544146769722	4.49332871297101e-07	9.38639891375064e-05	0.000772841053542932	1.83563926488293e-06	0.000155412831587819	0.003996003996004	0.0598950206261455	Gentianales
Arecales - Gentianales	metastat	pASV194|Protist	Protist	0.00298160241276386	2.46139963375116e-06	0.000219687819226942	0.00219023300108195	2.68997522807111e-06	0.000188134023758789	0.004995004995005	0.0659558262847435	Arecales
Arecales - Gentianales	metastat	pASV357|Stenamoeba	Protist	0.00249186166531606	1.62391314279982e-06	0.000178441682833763	0.00175879063247518	2.76786797853078e-06	0.000190838453952509	0.004995004995005	0.0659558262847435	Arecales
Arecales - Gentianales	metastat	pASV222|Paracercomonas_sp.	Protist	0.00234745205848888	2.4023634871227e-06	0.00021703724660567	0.00149038898896186	3.57591673199442e-06	0.000216913660121476	0.004995004995005	0.0659558262847435	Arecales
Arecales - Gentianales	metastat	pASV762|ATCC50593-lineage_X_sp.	Protist	0.00141411679624351	1.91521112347385e-06	0.000193786375382277	0.000724173152122565	1.47226391156913e-06	0.000139182950009252	0.004995004995005	0.0659558262847435	Arecales
Arecales - Gentianales	metastat	pASV533|Protogastrostyla_pulchra	Protist	0.000270887604441598	6.00342303835955e-07	0.000108496164550981	0.000897927533293245	2.70315717258583e-06	0.000188594426041768	0.004995004995005	0.0659558262847435	Gentianales
Arecales - Gentianales	metastat	pASV186|Flamella	Protist	0.0022882826396046	2.21718930360478e-06	0.000208504916178689	0.00145697864430252	2.57076697662596e-06	0.000183918137418239	0.00599400599400599	0.0692536175989807	Arecales
Arecales - Gentianales	metastat	pASV461|Filosa-Thecofilosea_XXX_sp.	Protist	0.00193603472180366	2.50585188769316e-06	0.000221662695867125	0.00110484721025561	2.46590328153198e-06	0.000180127998405665	0.00599400599400599	0.0692536175989807	Arecales
Arecales - Gentianales	metastat	pASV313|Anurofeca_sp.	Protist	0.00186791966500797	2.5344303567035e-06	0.000222923109785727	0.00100563703541399	2.51515506296842e-06	0.00018191796383363	0.00599400599400599	0.0692536175989807	Arecales
Arecales - Gentianales	metastat	pASV480|Chilodonellidae_X_sp.	Protist	0.00145647941790347	2.61155013968403e-06	0.000226289340190829	0.000634094900960311	1.57479170550076e-06	0.000143947710969751	0.00599400599400599	0.0692536175989807	Arecales
Arecales - Gentianales	metastat	pASV633|Centramoebida	Protist	0.000500386876622684	1.05426929137259e-06	0.00014377742134862	0.00117123088721142	2.40134249605286e-06	0.000177754358006124	0.00599400599400599	0.0692536175989807	Gentianales
Arecales - Gentianales	metastat	pASV892|Dictyochloris_fragrans	Protist	0.00117767486567542	1.83115752803487e-06	0.000189486278050183	0.000570494113349806	1.40904298228825e-06	0.000136161812710594	0.00599400599400599	0.0692536175989807	Arecales
Arecales - Gentianales	metastat	pASV179|Glissomonadida_XX_sp.	Protist	0.00110558346262034	2.23133790422159e-06	0.000209169126814136	0.00201799680514568	4.02249644788049e-06	0.000230059959229182	0.00699300699300699	0.0705127742825985	Gentianales
Arecales - Gentianales	metastat	pASV307|Metabolomonas_insania	Protist	0.00206675225849863	2.4031601092265e-06	0.000217073228324963	0.00127638431771246	2.88538665511605e-06	0.000194847668405619	0.00699300699300699	0.0705127742825985	Arecales
Arecales - Gentianales	metastat	pASV20|Leidyana1_sp.	Protist	0.00119525132349695	1.90480047580164e-06	0.000193258968581763	0.0020021854208233	3.85281076589788e-06	0.000225155232003736	0.00699300699300699	0.0705127742825985	Gentianales
Arecales - Gentianales	metastat	pASV723|Protist	Protist	0.00114769648315032	1.7997028955938e-06	0.000187851782186028	0.000474779191595585	1.07612957287951e-06	0.000118994116002227	0.00699300699300699	0.0705127742825985	Arecales
Arecales - Gentianales	metastat	pASV2336|Variosea_XXX_sp.	Protist	0.000430101569523159	9.54951726707289e-07	0.000136837654397199	0.000995382389985366	1.89752740431238e-06	0.000158010967487119	0.00699300699300699	0.0705127742825985	Gentianales
Arecales - Gentianales	metastat	pASV954|Chlamydomonadales_X	Protist	0.00101225321224579	1.83879073484963e-06	0.00018988080548378	0.000386787742365867	1.05158896098131e-06	0.000117629489733728	0.00699300699300699	0.0705127742825985	Arecales
Arecales - Gentianales	metastat	pASV1982|Stenamoeba	Protist	0.000855335075125558	1.23496527734212e-06	0.000155611713691742	0.000329506842067865	7.69288368342703e-07	0.00010060922111283	0.00699300699300699	0.0705127742825985	Arecales
Arecales - Gentianales	metastat	pASV1701|Protist	Protist	0.00147899793150902	1.85062920800314e-06	0.000190491068598367	0.000762527959216658	1.86618313220122e-06	0.000156700482491835	0.00799200799200799	0.0791469915416922	Arecales
Arecales - Gentianales	metastat	pASV56|Glissomonadida	Protist	0.00319185367802206	3.42847194985487e-06	0.000259277727915902	0.00398233921977632	1.40640353385747e-06	0.000136034222370767	0.00899100899100899	0.0831043411187768	Gentianales
Arecales - Gentianales	metastat	pASV156|Cryptodifflugia	Protist	0.0023637740928261	2.21875719858297e-06	0.000208578625725336	0.00308561456962801	2.61386516243951e-06	0.000185453397552263	0.00899100899100899	0.0831043411187768	Gentianales
Arecales - Gentianales	metastat	pASV200|Protist	Protist	0.00217066805988072	2.27907141644448e-06	0.000211394595087587	0.00288202787244897	2.50102693738731e-06	0.000181406309637093	0.00899100899100899	0.0831043411187768	Gentianales
Arecales - Gentianales	metastat	pASV1632|Protist	Protist	0.00167480336195825	2.00111039028951e-06	0.00019808447347818	0.000981133652022163	2.09076267456221e-06	0.000165861493999084	0.00899100899100899	0.0831043411187768	Arecales
Arecales - Gentianales	metastat	pASV933|Archaeplastida	Protist	0.00231596718021495	1.32554189377362e-06	0.000161217299087204	0.00167658741862996	3.09609474714142e-06	0.000201836787474872	0.00999000999000999	0.0879411017129914	Arecales
Arecales - Gentianales	metastat	pASV553|Chrysophyceae_Clade-F	Protist	0.00167829847751287	2.34962229475398e-06	0.000214641620817895	0.000963549417998959	2.73041207756621e-06	0.000189542804413195	0.00999000999000999	0.0879411017129914	Arecales
Arecales - Gentianales	metastat	pASV1087|Alveolata	Protist	0.000226715449194918	4.09606822701424e-07	8.96186717569442e-05	0.00066139415522048	1.57637994778778e-06	0.000144020281274063	0.00999000999000999	0.0879411017129914	Gentianales
Arecales - Gentianales	metastat	pASV805|Protist	Protist	0.000435410856753049	9.24637319805923e-07	0.000134648221397857	0.00101813955447923	2.57227795419763e-06	0.000183972178753289	0.010989010989011	0.0937587438263123	Gentianales
Arecales - Gentianales	metastat	pASV988|Centroheliozoa_X	Protist	0.00110387238534954	1.86311208107868e-06	0.000191132439509664	0.000471126852395515	1.59523115034132e-06	0.000144878858213069	0.010989010989011	0.0937587438263123	Arecales
Arecales - Gentianales	metastat	pASV128|Chlorosarcinopsis	Protist	0.00272840142636609	2.27653970222551e-06	0.00021127714826022	0.00187215114354999	4.13781038423761e-06	0.000233334252686593	0.011988011988012	0.0960316830705866	Arecales
Arecales - Gentianales	metastat	pASV43|Leidyana1_sp.	Protist	0.000919247746862189	2.25636366294132e-06	0.000210338833227617	0.00171276754568226	4.00317824277181e-06	0.000229506858135455	0.011988011988012	0.0960316830705866	Gentianales
Arecales - Gentianales	metastat	pASV1847|Opisthokonta	Protist	0.000961213772260769	1.44999450373917e-06	0.000168615731114269	0.000410829356731872	9.63856295069008e-07	0.000112615805604545	0.011988011988012	0.0960316830705866	Arecales
Arecales - Gentianales	metastat	pASV251|Limnofilidae_X_sp.	Protist	0.00237114385818981	1.74473194626279e-06	0.000184960618291782	0.00173105271235144	2.93434082705871e-06	0.000196493632783499	0.012987012987013	0.0960316830705866	Arecales
Arecales - Gentianales	metastat	pASV231|Cryptodifflugia	Protist	0.000996834369401738	1.89464128004067e-06	0.000192742909131323	0.00174106426771083	3.21593343136011e-06	0.000205705890947556	0.012987012987013	0.0960316830705866	Gentianales
Arecales - Gentianales	metastat	pASV753|Stenamoeba_sp.	Protist	0.0020273917835339	1.98036325288458e-06	0.000197054946695953	0.0013551008035808	3.11906445117264e-06	0.000202584110250424	0.012987012987013	0.0960316830705866	Arecales
Arecales - Gentianales	metastat	pASV394|ATCC50593-lineage_X_sp.	Protist	0.00175863888809444	2.81265103662749e-06	0.000234840414592611	0.000948477452224354	2.66981708121014e-06	0.000187427778413943	0.012987012987013	0.0960316830705866	Arecales
Arecales - Gentianales	metastat	pASV190|Glissomonadida	Protist	0.00148570044371562	2.11154159860403e-06	0.000203476722116355	0.000836346209811851	2.04376085609699e-06	0.000163986554972664	0.012987012987013	0.0960316830705866	Arecales
Arecales - Gentianales	metastat	pASV2479|Protist	Protist	0.000908415748666691	1.68154560405065e-06	0.000181580512259344	0.000344926821236644	7.46996306061396e-07	9.91408027199989e-05	0.012987012987013	0.0960316830705866	Arecales
Arecales - Gentianales	metastat	pASV853|Colpodellidae2_sp.	Protist	0.000216227252823254	4.59416353600588e-07	9.49113470354834e-05	0.000637561510540958	1.38757110499017e-06	0.000135120370556568	0.012987012987013	0.0960316830705866	Gentianales
Arecales - Gentianales	metastat	pASV325|Protist	Protist	0.00159660822672546	1.92545722293586e-06	0.000194304048323294	0.00228371672676042	2.91815663410974e-06	0.00019595100871706	0.013986013986014	0.096955064638573	Gentianales
Arecales - Gentianales	metastat	pASV180|Chlorophyceae_XX	Protist	0.000385213261595748	7.70473119611433e-07	0.000122911822339482	0.00100685369443557	2.42525053504261e-06	0.00017863703773451	0.013986013986014	0.096955064638573	Gentianales
Arecales - Gentianales	metastat	pASV1355|Protist	Protist	0.00142260186534161	2.04746432330291e-06	0.00020036556410833	0.000779958963164881	1.84405950811731e-06	0.000155768870112999	0.013986013986014	0.096955064638573	Arecales
Arecales - Gentianales	metastat	pASV1150|Protist	Protist	0.00162681316840851	2.33406085950149e-06	0.000213929659481596	0.000917519112270578	2.20049656564947e-06	0.000170158461968832	0.013986013986014	0.096955064638573	Arecales
Arecales - Gentianales	metastat	pASV1861|Protist	Protist	0.00106635327544922	1.68341627982909e-06	0.000181681485984649	0.00050928925047927	1.10846211054689e-06	0.000120768488316919	0.013986013986014	0.096955064638573	Arecales
Arecales - Gentianales	metastat	pASV14|Colpodida	Protist	0.0035597434723624	1.1038339715679e-06	0.000147118331162627	0.00408725221244225	1.23014574387986e-06	0.000127224715401315	0.014985014985015	0.0989337394271153	Gentianales
Arecales - Gentianales	metastat	pASV99|Parabodo_sp.	Protist	0.00154347413262187	1.77290367986454e-06	0.000186447894201694	0.000892835652802079	2.1616145896977e-06	0.000168648442722915	0.014985014985015	0.0989337394271153	Arecales
Arecales - Gentianales	metastat	pASV363|Thaumatomonadida	Protist	0.000944194649927584	1.68466575418293e-06	0.00018174889778682	0.00158637820642766	2.54143323624167e-06	0.000182865827871639	0.014985014985015	0.0989337394271153	Gentianales
Arecales - Gentianales	metastat	pASV813|Trebouxiophyceae	Protist	0.000869518004867629	1.53194887472798e-06	0.000173315357744086	0.000353420134791499	7.68264874267371e-07	0.000100542271436562	0.014985014985015	0.0989337394271153	Arecales
Arecales - Gentianales	metastat	pASV746|Chilodonellidae_X_sp.	Protist	0.00116556814387953	2.01239343062517e-06	0.000198642127249334	0.000581677741157709	1.62892173155055e-06	0.000146400753680767	0.015984015984016	0.103075151775227	Arecales
Arecales - Gentianales	metastat	pASV1187|Thaumatomonas	Protist	0.000138627015520343	3.31516337425362e-07	8.06245641332328e-05	0.000530982368519197	1.2368314200442e-06	0.000127569971514305	0.015984015984016	0.103075151775227	Gentianales
Arecales - Gentianales	metastat	pASV420|Euglyphidae	Protist	0.00162141554510516	2.35791390688661e-06	0.00021502001306247	0.000915848599833506	1.89804046311879e-06	0.000158032327768669	0.016983016983017	0.108258528660476	Arecales
Arecales - Gentianales	metastat	pASV365|Sandonidae_Clade_N/F-A_sp.	Protist	0.00204257980096494	2.06112980599036e-06	0.00020103310653069	0.00140571045155935	2.29129134463414e-06	0.000173633436653582	0.017982017982018	0.108396966676665	Arecales
Arecales - Gentianales	metastat	pASV747|Breviata-lineage_X_sp.	Protist	0.00151976511583795	2.29872809855928e-06	0.000212304262726283	0.000840886810151624	2.04630440265642e-06	0.000164088567333894	0.017982017982018	0.108396966676665	Arecales
Arecales - Gentianales	metastat	pASV1999|Protist	Protist	0.00122290550345362	2.13711641499074e-06	0.000204705259901134	0.00062606543187548	1.70965613427327e-06	0.000149984917411599	0.017982017982018	0.108396966676665	Arecales
Arecales - Gentianales	metastat	pASV182|Leidyana1_sp.	Protist	0.000606501606522896	1.53972162868705e-06	0.00017375448244674	0.00125348867008017	3.26229605132996e-06	0.000207183368164086	0.017982017982018	0.108396966676665	Gentianales
Arecales - Gentianales	metastat	pASV2334|Petalomonas	Protist	0.000205453917276294	4.17964124986789e-07	9.05283104876091e-05	0.0006013596951587	1.38721138064673e-06	0.000135102854611955	0.017982017982018	0.108396966676665	Gentianales
Arecales - Gentianales	metastat	pASV150|Dictyochloropsis	Protist	0.00214215585798352	2.46934918429932e-06	0.000220042294700017	0.00288345532538784	3.0621286143512e-06	0.000200726595094684	0.020979020979021	0.123772422942859	Gentianales
Arecales - Gentianales	metastat	pASV975|Filamoeba_sp.	Protist	0.00148580678741092	2.58741144903377e-06	0.000225241110422124	0.000799702760471266	2.08569149673506e-06	0.000165660222043696	0.020979020979021	0.123772422942859	Arecales
Arecales - Gentianales	metastat	pASV457|Peregrinia_clavideferens	Protist	0.000963662022889229	1.74833021635732e-06	0.000185151247995949	0.00164667415026173	3.4677904864578e-06	0.00021360904051616	0.021978021978022	0.124373843851231	Gentianales
Arecales - Gentianales	metastat	pASV642|ATCC50593-lineage_X_sp.	Protist	0.00174617321742137	2.23883679067987e-06	0.000209520310713702	0.00107221032598194	2.60167164429717e-06	0.000185020327627775	0.021978021978022	0.124373843851231	Arecales
Arecales - Gentianales	metastat	pASV611|Cercozoa	Protist	0.000624220065452889	1.46144821560532e-06	0.000169280380921152	0.00128525651258132	3.41183627460709e-06	0.000211878697750905	0.021978021978022	0.124373843851231	Gentianales
Arecales - Gentianales	metastat	pASV1044|Colpodida	Protist	0.00104680832920487	1.83644983358976e-06	0.000189759901629575	0.000482725047233303	1.08944467840074e-06	0.00011972801844184	0.021978021978022	0.124373843851231	Arecales
Arecales - Gentianales	metastat	pASV152|Protist	Protist	0.00107246219966479	2.28227936768958e-06	0.000211543319055579	0.00181594342204224	3.80790566863408e-06	0.000223839277062163	0.022977022977023	0.126165006318935	Gentianales
Arecales - Gentianales	metastat	pASV319|Chlamydomonas	Protist	0.00137813322380209	2.26868683427367e-06	0.000210912435797403	0.000779610133040236	1.90331861661158e-06	0.000158251906806986	0.022977022977023	0.126165006318935	Arecales
Arecales - Gentianales	metastat	pASV797|Breviata-lineage_X_sp.	Protist	0.00143470361110456	1.72918962922762e-06	0.000184134947808565	0.000828013713467257	1.90295357939365e-06	0.000158236730523474	0.022977022977023	0.126165006318935	Arecales
Arecales - Gentianales	metastat	pASV1122|WIM80-lineage_X_sp.	Protist	0.00133522786133721	2.372253988646e-06	0.000215672863594607	0.00067697242917637	1.64641778468861e-06	0.000147184890202077	0.023976023976024	0.130359750774552	Arecales
Arecales - Gentianales	metastat	pASV744|Naegleria	Protist	0.00175918951802598	2.62078652267111e-06	0.000226689150672825	0.00110924222060945	2.51781388281692e-06	0.000182014092962783	0.024975024975025	0.130667203016945	Arecales
Arecales - Gentianales	metastat	pASV1184|Nolandellidae_X_sp.	Protist	0.00155218493288311	1.84576625486756e-06	0.000190240624456191	0.000967484120296685	1.80564706673334e-06	0.000154137970779315	0.024975024975025	0.130667203016945	Arecales
Arecales - Gentianales	metastat	pASV1309|Protaspa_obliqua	Protist	0.0011874156111579	1.78348235524463e-06	0.000187003321520497	0.000658578949860583	1.27127688828125e-06	0.000129334169798182	0.024975024975025	0.130667203016945	Arecales
Arecales - Gentianales	metastat	pASV460|Opisthokonta	Protist	0.000249405315166394	5.19846296037106e-07	0.000100960708338336	0.000669748382123747	1.59551939003663e-06	0.000144891946583281	0.024975024975025	0.130667203016945	Gentianales
Arecales - Gentianales	metastat	pASV256|Chlorophyta	Protist	0.00148005084549829	2.14782865154731e-06	0.000205217658317313	0.00214892495807225	3.06022533275599e-06	0.0002006642040809	0.026973026973027	0.137236526618164	Gentianales
Arecales - Gentianales	metastat	pASV355|Neobodo_sp.	Protist	0.00122885421487818	2.47706766849592e-06	0.000220385921247782	0.00063858726748606	1.64796127035882e-06	0.000147253865571583	0.026973026973027	0.137236526618164	Arecales
Arecales - Gentianales	metastat	pASV178|Cercomonas_sp.	Protist	0.000391095756235386	1.17767621632273e-06	0.000151959502881959	0.000926573378142117	2.99880263532694e-06	0.000198640200896487	0.026973026973027	0.137236526618164	Gentianales
Arecales - Gentianales	metastat	pASV632|Stenophora_robusta	Protist	0.000385803501263185	1.04453322198207e-06	0.000143111996591047	0.000887141979177182	1.96344945789046e-06	0.000160732265858577	0.027972027972028	0.141025548565197	Gentianales
Arecales - Gentianales	metastat	pASV547|Dimastigella_trypaniformis	Protist	0.00197676966224778	3.82489828488861e-06	0.000273857637443346	0.00127313395337577	2.42873847893051e-06	0.0001787654475817	0.02997002997003	0.147087329413764	Arecales
Arecales - Gentianales	metastat	pASV1020|Protist	Protist	0.00061420537242118	9.89447138889989e-07	0.000139287200747092	0.00105626787674	1.75668745421052e-06	0.000152033906113186	0.02997002997003	0.147087329413764	Gentianales
Arecales - Gentianales	metastat	pASV1033|Pterocystis	Protist	0.00155268971834012	1.85685065712986e-06	0.00019081099657596	0.000991291568156074	2.20254719049142e-06	0.000170237728149237	0.02997002997003	0.147087329413764	Arecales
Arecales - Gentianales	metastat	pASV504|Paracercomonas	Protist	0.00171415849984809	1.75108825381541e-06	0.00018529723095692	0.00116631991393344	2.08747511864473e-06	0.000165731040776628	0.031968031968032	0.15109880203414	Arecales
Arecales - Gentianales	metastat	pASV971|Paracercomonas_sp.	Protist	0.00144349679641014	1.79494360758452e-06	0.00018760323210898	0.000871305644068046	1.74811758682803e-06	0.000151662609746456	0.031968031968032	0.15109880203414	Arecales
Arecales - Gentianales	metastat	pASV501|Chrysophyceae_X	Protist	0.000549277256565455	1.32568139965612e-06	0.000161225782474249	0.00103367658534297	2.48308907949251e-06	0.000180754598088581	0.031968031968032	0.15109880203414	Gentianales
Arecales - Gentianales	metastat	pASV1054|Notosolenus_urceolatus	Protist	0.000358695782815342	7.27027465725774e-07	0.000119396149453937	0.000818125435640122	2.05643990949745e-06	0.000164494437175877	0.031968031968032	0.15109880203414	Gentianales
Arecales - Gentianales	metastat	pASV270|Euglyphida	Protist	0.000924489532793747	1.84420315989305e-06	0.000190160054355305	0.0015506052658129	3.39817505295723e-06	0.00021145408400921	0.032967032967033	0.15109880203414	Gentianales
Arecales - Gentianales	metastat	pASV51|Protist	Protist	0.00056362603294009	1.21859161086364e-06	0.000154576690203242	0.00110518023292849	2.76114666019292e-06	0.000190606603001579	0.032967032967033	0.15109880203414	Gentianales
Arecales - Gentianales	metastat	pASV1349|Cercozoa	Protist	0.00098823707352474	1.58517694962417e-06	0.000176300598334274	0.000509019999861019	1.14072591555318e-06	0.00012251347485251	0.032967032967033	0.15109880203414	Arecales
Arecales - Gentianales	metastat	pASV899|Acanthamoeba	Protist	0.000188521039980625	4.56789016718179e-07	9.4639565651111e-05	0.000569694461050355	1.4750044897561e-06	0.000139312432369047	0.032967032967033	0.15109880203414	Gentianales
Arecales - Gentianales	metastat	pASV154|ATCC50593-lineage_X_sp.	Protist	0.00230354213375424	1.67084907347047e-06	0.000181002062249679	0.00282428183853452	1.98763939662444e-06	0.000161719355537872	0.033966033966034	0.153146211275795	Gentianales
Arecales - Gentianales	metastat	pASV1166|Cercozoa	Protist	0.000891014703262416	1.53588955259238e-06	0.00017353812671393	0.000435607343046494	1.08448833995395e-06	0.000119455361622853	0.033966033966034	0.153146211275795	Arecales
Arecales - Gentianales	metastat	pASV124|Viridiraptor_invadens	Protist	0.00256273193758736	1.6646573849909e-06	0.000180666380054991	0.00311662730348367	3.00338310168787e-06	0.000198791847686014	0.036963036963037	0.16531508717176	Gentianales
Arecales - Gentianales	metastat	pASV52|Acanthamoeba	Protist	0.0032165768224597	1.43997824105182e-06	0.000168032340552657	0.00255610167874907	4.65566776355071e-06	0.000247505123911626	0.037962037962038	0.167088093254684	Arecales
Arecales - Gentianales	metastat	pASV536|Filosa-Sarcomonadea	Protist	0.000910519357849517	1.56325781922754e-06	0.000175077451724946	0.00146290714955127	2.89014703525362e-06	0.000195008334344621	0.037962037962038	0.167088093254684	Gentianales
Arecales - Gentianales	metastat	pASV1555|Protist	Protist	0.00145657250656315	2.39293698385067e-06	0.000216611017763824	0.000843045193577407	2.07867869122231e-06	0.000165381484486081	0.038961038961039	0.167887557815711	Arecales
Arecales - Gentianales	metastat	pASV973|Paracercomonas_sp.	Protist	0.000326798247421142	6.10901592608357e-07	0.00010944616302166	0.000702871561368591	1.59950939001443e-06	0.000145073002948172	0.038961038961039	0.167887557815711	Gentianales
Arecales - Gentianales	metastat	pASV494|Cercomonadidae	Protist	0.00146502342490199	1.8588495455402e-06	0.000190913672388097	0.000926204545326257	1.84486624411669e-06	0.000155802939136721	0.03996003996004	0.167887557815711	Arecales
Arecales - Gentianales	metastat	pASV843|Eupetalomonads_XX_sp.	Protist	0.00042425081439137	9.42102407285541e-07	0.0001359139294601	0.000847918608182314	1.81320843635612e-06	0.000154460369485276	0.03996003996004	0.167887557815711	Gentianales
Arecales - Gentianales	metastat	pASV758|Limnofilidae_X_sp.	Protist	0.000278192074612149	6.36995872405119e-07	0.000111759183717484	0.000699164739769959	2.1762175194565e-06	0.000169217141701071	0.03996003996004	0.167887557815711	Gentianales
Arecales - Gentianales	metastat	pASV946|Cercomonadidae	Protist	0.000740926663134953	1.51886567939548e-06	0.000172573694368947	0.000319485632251675	9.12121398009677e-07	0.000109551802094866	0.03996003996004	0.167887557815711	Arecales
Arecales - Gentianales	metastat	pASV1737|Protist	Protist	0.00131406328551822	2.03690730201867e-06	0.000199848339655628	0.000785905354914665	1.68717110178561e-06	0.000148995368251288	0.040959040959041	0.169516317704968	Arecales
Arecales - Gentianales	metastat	pASV1241|Penardia_sp.	Protist	0.000450613430685212	8.05116682384504e-07	0.000125644743683858	0.000867595294798913	2.01772085917414e-06	0.000162938511940376	0.040959040959041	0.169516317704968	Gentianales
Arecales - Gentianales	metastat	pASV557|Colpodida	Protist	0.000665403776834387	1.56310682455657e-06	0.000175068996177729	0.00120357553623461	2.58664402144141e-06	0.000184485201996822	0.041958041958042	0.17167093940029	Gentianales
Arecales - Gentianales	metastat	pASV844|Protist	Protist	0.00133654068348515	1.66754268557209e-06	0.000180822884069949	0.000816368522433066	1.84834924571822e-06	0.000155949943289768	0.042957042957043	0.17167093940029	Arecales
Arecales - Gentianales	metastat	pASV541|Vorticellides_astyliformis	Protist	0.000347678398742718	7.89962442287904e-07	0.000124456657727516	0.000766696899002326	2.01970595310726e-06	0.000163018644118882	0.042957042957043	0.17167093940029	Gentianales
Arecales - Gentianales	metastat	pASV77|Watanabea-Clade_XX_sp.	Protist	0.00262186539646529	2.14503602737935e-06	0.0002050842020942	0.00319926352263786	2.79294882255747e-06	0.000191701138787954	0.043956043956044	0.17167093940029	Gentianales
Arecales - Gentianales	metastat	pASV400|Cyrtolophosidida	Protist	0.00113848032365665	1.90922902672522e-06	0.000193483496115617	0.0016894011906537	2.96574644494643e-06	0.000197542348722417	0.043956043956044	0.17167093940029	Gentianales
Arecales - Gentianales	metastat	pASV525|Hartmannellidae_X_sp.	Protist	0.00172467985410825	2.10857744974688e-06	0.000203333853249747	0.00115023698929399	2.76486255910384e-06	0.000190734817258214	0.043956043956044	0.17167093940029	Arecales
Arecales - Gentianales	metastat	pASV1199|Protist	Protist	0.000840733687435434	1.36947013087567e-06	0.000163866883498058	0.00138538077512027	3.24577436046447e-06	0.00020665806873803	0.043956043956044	0.17167093940029	Gentianales
Arecales - Gentianales	metastat	pASV804|Glissomonadida	Protist	0.000965341656816178	1.89553542253502e-06	0.000192788384572767	0.00046661832462011	1.57630647463127e-06	0.00014401692492968	0.043956043956044	0.17167093940029	Arecales
Arecales - Gentianales	metastat	pASV413|Limnofilidae_X_sp.	Protist	0.00219165564135083	2.00537061370985e-06	0.000198295215337343	0.00160467698163929	2.68451445229072e-06	0.000187942966303005	0.045954045954046	0.176981467197395	Arecales
Arecales - Gentianales	metastat	pASV874|Protist	Protist	0.000372400962210037	7.45506966556245e-07	0.000120904026640826	0.000785851537547582	2.11967563022999e-06	0.000167004397603224	0.045954045954046	0.176981467197395	Gentianales
Arecales - Gentianales	metastat	pASV196|Eupetalomonads_XX_sp.	Protist	0.00152968774973379	2.4391224836369e-06	0.000218691405985018	0.00220513442065095	3.68847669043587e-06	0.000220301130346739	0.046953046953047	0.178351782309704	Gentianales
Arecales - Gentianales	metastat	pASV542|Opisthokonta	Protist	0.00144499770495834	1.92278198417844e-06	0.000194169017953201	0.000900876637503959	2.24571557250088e-06	0.000171897903163051	0.046953046953047	0.178351782309704	Arecales
Arecales - Gentianales	metastat	pASV48|Thaumatomonas_sp.	Protist	0.00335606447100496	2.1727726831236e-06	0.000206405876717694	0.0038431861018642	1.37489991828022e-06	0.000134502001466238	0.047952047952048	0.178479121865829	Gentianales
Arecales - Gentianales	metastat	pASV255|Variosea_XXX_sp.	Protist	0.00251301597089227	1.57191399824834e-06	0.000175561508033249	0.00199110852553301	2.61974425649705e-06	0.00018566184089477	0.047952047952048	0.178479121865829	Arecales
Arecales - Gentianales	metastat	pASV708|Protist	Protist	0.000726969867632985	1.70712644793118e-06	0.000182956463691485	0.00124929549266107	2.84547584707763e-06	0.000193495404782837	0.047952047952048	0.178479121865829	Gentianales
Arecales - Gentianales	metastat	pASV132|Gregarinidae	Protist	0.000797098261513313	1.89585680105379e-06	0.00019280472703168	0.00136241569960445	3.24638697478117e-06	0.000206677570358339	0.048951048951049	0.178601434860529	Gentianales
Arecales - Gentianales	metastat	pASV872|Penardia_sp.	Protist	0.00106693501189191	2.58036699795243e-06	0.000224934282252396	0.000531763020354117	1.35039763399613e-06	0.000133298124221617	0.048951048951049	0.178601434860529	Arecales
Arecales - Gentianales	metastat	pASV718|Acanthamoebidae	Protist	0.000283672842203936	7.76273812289458e-07	0.00012337364038939	0.000694112232984493	1.8057090785178e-06	0.000154140617555845	0.048951048951049	0.178601434860529	Gentianales
Arecales - Gentianales	metastat	pASV618|Protist	Protist	0.000553853323180224	1.13470483251022e-06	0.00014916137021007	0.00103626117808547	2.2076202151972e-06	0.000170433665719216	0.04995004995005	0.17871901315866	Gentianales
Arecales - Gentianales	metastat	pASV1518|Mesofila_sp.	Protist	0.00111469103542397	1.93810781041663e-06	0.000194941308936146	0.000641268948585017	1.41010222252457e-06	0.000136212982538983	0.04995004995005	0.17871901315866	Arecales
Arecales - Gentianales	metastat	pASV3906|Protist	Protist	0.000793290618323144	1.2914671039077e-06	0.000159131657410922	0.000406855468280738	7.82742123331317e-07	0.000101485163767349	0.04995004995005	0.17871901315866	Arecales
Arecales - Lamiales	metastat	bASV11|Acinetobacter	Bacteria	0.000514799590074445	3.22866554054721e-07	7.9565801360704e-05	0.00108649321224668	9.08832141751139e-07	0.000119165860106247	0.000999000999000999	0.0388348288227952	Lamiales
Arecales - Lamiales	metastat	bASV291|uncultured_bacterium	Bacteria	0.000681851892427484	1.77394061208343e-07	5.89772407429661e-05	0.00106528664552529	4.25351880847844e-07	8.15237581214677e-05	0.000999000999000999	0.0388348288227952	Lamiales
Arecales - Lamiales	metastat	bASV150|Mesorhizobium_plurifarium	Bacteria	0.00104335879280924	8.50725884046321e-07	0.000129154557361259	0.000555774514216232	7.57122418758361e-07	0.00010876597718542	0.000999000999000999	0.0388348288227952	Arecales
Arecales - Lamiales	metastat	bASV397|Cellulomonas	Bacteria	0.000633772986797925	1.7493021901065e-07	5.85662385195299e-05	0.00104451249504268	4.70714939232943e-07	8.57608356157677e-05	0.000999000999000999	0.0388348288227952	Lamiales
Arecales - Lamiales	metastat	bASV167|Arthrobacter	Bacteria	0.000307024310580435	2.19776084036857e-07	6.56455252177545e-05	0.000664151340055119	5.45396210645633e-07	9.23136814959625e-05	0.000999000999000999	0.0388348288227952	Lamiales
Arecales - Lamiales	metastat	bASV1749|uncultured_Planctomycetaceae	Bacteria	0.000765072062186183	2.09811575523862e-07	6.41401002591374e-05	0.000464365678292749	2.70037204274873e-07	6.49563801084611e-05	0.000999000999000999	0.0388348288227952	Arecales
Arecales - Lamiales	metastat	bASV312|Gaiellales	Bacteria	0.000408797661802411	2.67887925805345e-07	7.24755436513296e-05	0.000826895020349727	5.33693968337574e-07	9.13179514404183e-05	0.000999000999000999	0.0388348288227952	Lamiales
Arecales - Lamiales	metastat	bASV659|Acidobacteriales	Bacteria	0.000277333723296173	1.47689789219633e-07	5.38133646968186e-05	0.00067820773835111	5.55823397131601e-07	9.31919555550868e-05	0.000999000999000999	0.0388348288227952	Lamiales
Arecales - Lamiales	metastat	bASV1370|metagenome	Bacteria	0.000187176056280912	1.09140038853208e-07	4.62601422590507e-05	0.000570576531411012	4.56969338926201e-07	8.44993841440391e-05	0.000999000999000999	0.0388348288227952	Lamiales
Arecales - Lamiales	metastat	bASV523|uncultured_beta	Bacteria	0.000730422319008172	3.27808559711383e-07	8.01724317821921e-05	0.000267465137161858	2.30571217989984e-07	6.00222898687937e-05	0.000999000999000999	0.0388348288227952	Arecales
[truncated: 27,229 more rows]

## Sheet: Table S8C
Comparison	Method	Fungi	Clade	mean.group1.	variance.group1.	std.err.group1.	mean.group2.	variance.group2.	std.err.group2.	pvalue	qvalue	Group
[truncated: 97,065 more rows]

## Sheet: Table S8D
GroupComparison	ID	Description	K_num	Exist_K_num	Significant_K_num	Significant_up_num	Significant_down_num	Z_score	BG_Mean	BG_Sd	ReporterScore	p.value	p.adjust
[truncated: 685 more rows]
