# Supplementary material for: A quantitative microbiome atlas reveals hidden diversity, eukaryotic keystones, and evolutionary trade-offs in plant rhizospheres
Source: Research Square preprint supplement (doi:10.21203/rs.3.rs-7503976/v1), 2025-09-12
Supplement: Supplementary file 7 [file a944baa2c1abdd61e244b93a.xlsx]

## Sheet: Table S2A
Supplementary Information Table 2: Comprehensive profiles of core bacterial (A), fungal (B), and protistan ASVs (C) revealing taxonomic gaps and core taxa dynamics. These tables catalog core Amplicon Sequence Variants (ASVs) identified via QIIME2 from rhizosphere microbiomes, detailing: Taxonomic identity (Domain to Genus; 18S/ITS/16S classification); Quantitative abundance across 1,549 samples (…
FeatureID	ASVID	Taxonomy	Fasta	CA_RS01	CA_RS02	CA_RS03	CA_RS04	CA_RS05	CA_RS06	CA_RS07	CA_RS08	CA_RS09	CA_RS10	CA_RS11	CA_RS12	CB_RS01	CB_RS02	CB_RS03	CB_RS04	CB_RS05	CB_RS06	CB_RS07	CB_RS08	CB_RS09	CB_RS10	CB_RS11	CB_RS12	CB_RS13	CB_RS14	CB_RS15	CB_RS16	CB_RS17	CB_RS18	CB_RS19	CB_RS20	CB_RS21	CB_RS22	CB_RS23	CB_RS24	CC_RS01	CC_RS02	CC_RS03	CC_RS04	CC_RS05	CC_RS06	CC_RS07	CC_RS08	CC_RS09	CC_RS10
a91b69f242cda15c0d363b682c7e9c3e	bASV1	d__Bacteria; p__Proteobacteria; c__Gammaproteobacteria; o__Pseudomonadales; f__Pseudomonadaceae; g__Pseudomonas	GTAGTCCACGCCGTAAACGATGTCAACTAGCCGTTGGAATCCTTGAGATTTTAGTGGCGCAGCTAACGCATTAAGTTGACCGCCTGGGGAGTACGGCCGCAAGGTTAAAACTCAAATGAATTGACGGGGGCCCGCACAAGCGGTGGAGCATGTGGTTTAATTCGAAGCAACGCGAAGAACCTTACCAGGCCTTGACATGCAGAGAACTTTCCAGAGATGGATTGGTGCCTTCGGGAACTCTGACACAGGTGCTGCATGGCTGTCGTCAGCTCGTGTCGTGAGATGTTGGGTTAAGTCCCGTAACGA	41062	3405	40261	3927	1511	2129	1276	9146	1402	1935	915	22709	8227	1992	1626	326	4702	6492	1016	12835	2133	2936	1855	726	34979	6428	535	1199	1768	3231	450	1020	8009	911	30111	855	1213	494	95	416	317	4290	6127	498	37343	806
594e41ffc17fb0cb66d4f509e6171500	bASV2	d__Bacteria; p__Proteobacteria; c__Gammaproteobacteria; o__Enterobacterales; f__Enterobacteriaceae	GTAGTCCACGCCGTAAACGATGTCGACTTGGAGGTTGTGCCCTTGAGGCGTGGCTTCCGGAGCTAACGCGTTAAGTCGACCGCCTGGGGAGTACGGCCGCAAGGTTAAAACTCAAATGAATTGACGGGGGCCCGCACAAGCGGTGGAGCATGTGGTTTAATTCGATGCAACGCGAAGAACCTTACCTACTCTTGACATCCAGAGAACTTTCCAGAGATGGATTGGTGCCTTCGGGAACTCTGAGACAGGTGCTGCATGGCTGTCGTCAGCTCGTGTTGTGAAATGTTGGGTTAAGTCCCGCAACGA	8173	24425	61676	102	421	65	0	71	56	47	0	8971	287	78	643	112	0	1379	0	420	266	118	1283	150	99	383	147	534	911	342	64	137	0	0	247	376	331	152	27	54	0	102	47	60	3559	0
27004065c83927751dd986fde8dc5b7b	bASV3	d__Bacteria; p__Proteobacteria; c__Gammaproteobacteria; o__Enterobacterales; f__Enterobacteriaceae	GTAGTCCACGCCGTAAACGATGTCGACTTGGAGGTTGTGCCCTTGAGGCGTGGCTTCCGGAGCTAACGCGTTAAGTCGACCGCCTGGGGAGTACGGCCGCAAGGTTAAAACTCAAATGAATTGACGGGGGCCCGCACAAGCGGTGGAGCATGTGGTTTAATTCGATGCAACGCGAAGAACCTTACCTACTCTTGACATCCAGAGAACTTAGCAGAGATGCTTTGGTGCCTTCGGGAACTCTGAGACAGGTGCTGCATGGCTGTCGTCAGCTCGTGTTGTGAAATGTTGGGTTAAGTCCCGCAACGA	17228	34491	122716	149	0	174	0	268	134	110	64	14242	598	125	785	326	767	216	127	870	516	307	1682	280	240	0	127	511	999	1293	134	172	0	0	304	388	236	63	49	59	55	129	63	82	61541	57
b20e2ff32dd38b8025f8fe97aa471f45	bASV4	d__Bacteria; p__Proteobacteria; c__Gammaproteobacteria; o__Pseudomonadales; f__Pseudomonadaceae; g__Pseudomonas	GTAGTCCACGCCGTAAACGATGTCAACTAGCCGTTGGGTTCCTTGAGAACTTAGTGGCGCAGCTAACGCATTAAGTTGACCGCCTGGGGAGTACGGCCGCAAGGTTAAAACTCAAATGAATTGACGGGGGCCCGCACAAGCGGTGGAGCATGTGGTTTAATTCGAAGCAACGCGAAGAACCTTACCTGGCCTTGACATGCTGAGAACTTTCCAGAGATGGATTGGTGCCTTCGGGAACTCAGACACAGGTGCTGCATGGCTGTCGTCAGCTCGTGTCGTGAGATGTTGGGTTAAGTCCCGTAACGA	979	128	287	794	913	947	257	757	386	150	103	192	2980	497	268	0	485	2243	395	1879	575	597	529	338	3384	12792	2986	404	20091	11466	11038	1552	21570	128	289	10366	808	542	172	855	165	131	152	345	598	241
d22412ad64524477d2432ae89ebf9d97	bASV5	d__Bacteria; p__Proteobacteria; c__Gammaproteobacteria; o__Enterobacterales	GTAGTCCACGCCGTAAACGATGTCGACTTGGAGGTTGTTCCCTTGAGGAGTGGCTTCCGGAGCTAACGCGTTAAGTCGACCGCCTGGGGAGTACGGCCGCAAGGTTAAAACTCAAATGAATTGACGGGGGCCCGCACAAGCGGTGGAGCATGTGGTTTAATTCGATGCAACGCGAAGAACCTTACCTACTCTTGACATCCAGAGAACTTAGCAGAGATGCTTTGGTGCCTTCGGGAACTCTGAGACAGGTGCTGCATGGCTGTCGTCAGCTCGTGTTGTGAAATGTTGGGTTAAGTCCCGCAACGA	9610	4570	36272	247	5933	166	740	412	305	124	96	9044	399	105	570	0	4245	321	74	1005	718	959	3623	471	1101	773	102	203	808	737	147	175	210	155	106	192	70	19	64	0	0	0	0	0	8131	99
655c4d075b5deb919eb3f84b85f0bd37	bASV6	d__Bacteria; p__Proteobacteria; c__Alphaproteobacteria; o__Rhizobiales; f__Xanthobacteraceae; g__Bradyrhizobium	GTAGTCCACGCCGTAAACGATGAATGCCAGCCGTTAGTGGGTTTACTCACTAGTGGCGCAGCTAACGCTTTAAGCATTCCGCCTGGGGAGTACGGTCGCAAGATTAAAACTCAAAGGAATTGACGGGGGCCCGCACAAGCGGTGGAGCATGTGGTTTAATTCGACGCAACGCGCAGAACCTTACCAGCCCTTGACATCCCGGTCGCGGACTCCAGAGACGGAGTTCTTCAGTTCGGCTGGACCGGAGACAGGTGCTGCATGGCTGTCGTCAGCTCGTGTCGTGAGATGTTGGGTTAAGTCCCGCAA	5025	1836	3672	17016	24476	14577	4067	19205	12782	11830	3130	1856	21632	5359	7524	117	16463	23478	5928	5943	10790	12090	19714	5806	9172	4687	2794	2268	17206	3794	2588	2730	3494	3739	5571	9051	8752	3324	1098	3817	2476	4233	5459	7321	12526	5772
0f937287ee1b12755bc21ec245b1f6d7	bASV7	d__Bacteria; p__Firmicutes; c__Bacilli; o__Bacillales; f__Bacillaceae; g__Bacillus	GTAGTCCACGCCGTAAACGATGAGTGCTAAGTGTTAGAGGGTTTCCGCCCTTTAGTGCTGAAGTTAACGCATTAAGCACTCCGCCTGGGGAGTACGGCCGCAAGGCTGAAACTCAAAGGAATTGACGGGGGCCCGCACAAGCGGTGGAGCATGTGGTTTAATTCGAAGCAACGCGAAGAACCTTACCAGGTCTTGACATCCTCTGAAAACCCTAGAGATAGGGCTTCTCCTTCGGGAGCAGAGTGACAGGTGGTGCATGGTTGTCGTCAGCTCGTGTCGTGAGATGTTGGGTTAAGTCCCGCAACG	37731	6184	38486	3748	12869	562	8637	2355	3560	9729	7225	23735	6705	616	20653	0	4429	3952	18010	9092	5430	4116	1016	8278	10949	1032	262	254	5663	189	131	200	475	1785	4873	748	1889	1184	151	425	295	309	364	571	47709	590
49c87ddfdb4c162c52838c414dc2fb34	bASV8	d__Bacteria; p__Firmicutes; c__Bacilli; o__Bacillales; f__Bacillaceae; g__Bacillus	GTAGTCCACGCCGTAAACGATGAGTGCTAAGTGTTAGAGGGTTTCCGCCCTTTAGTGCTGCAGCTAACGCATTAAGCACTCCGCCTGGGGAGTACGGTCGCAAGACTGAAACTCAAAGGAATTGACGGGGGCCCGCACAAGCGGTGGAGCATGTGGTTTAATTCGAAGCAACGCGAAGAACCTTACCAGGTCTTGACATCCTCTGACAACTCTAGAGATAGAGCGTTCCCCTTCGGGGGACAGAGTGACAGGTGGTGCATGGTTGTCGTCAGCTCGTGTCGTGAGATGTTGGGTTAAGTCCCGCAA	7412	536	16819	194	579	418	0	227	106	801	80	3766	3575	805	1553	0	0	430	0	45	146	194	3188	1467	136	0	1179	862	20817	656	434	531	0	0	850	1238	1481	536	221	579	363	330	590	648	2520	319
8fb5092f3a1890f54a558ac3bb2aa62d	bASV9	d__Bacteria; p__Proteobacteria; c__Gammaproteobacteria; o__Pseudomonadales; f__Pseudomonadaceae; g__Pseudomonas	GTAGTCCACGCCGTAAACGATGTCGACTAGCCGTTGGGATCCTTGAGATCTTAGTGGCGCAGCTAACGCATTAAGTCGACCGCCTGGGGAGTACGGCCGCAAGGTTAAAACTCAAATGAATTGACGGGGGCCCGCACAAGCGGTGGAGCATGTGGTTTAATTCGAAGCAACGCGAAGAACCTTACCAGGCCTTGACATGCAGAGAACTTTCCAGAGATGGATTGGTGCCTTCGGGAACTCTGACACAGGTGCTGCATGGCTGTCGTCAGCTCGTGTCGTGAGATGTTGGGTTAAGTCCCGTAACGA	888	133	549	844	738	1425	570	1193	502	260	183	294	6744	1030	332	0	1620	4318	1115	1428	1395	1854	910	609	6537	1205	355	168	2303	2073	1255	710	874	461	244	756	294	161	54	270	70	91	79	122	176	81
222450cbe1e33d87d9fe845a57e15b1e	bASV10	d__Bacteria; p__Proteobacteria; c__Gammaproteobacteria; o__Pseudomonadales; f__Pseudomonadaceae; g__Pseudomonas	GTAGTCCACGCCGTAAACGATGTCAACTAGCCGTTGGAATCCTTGAGATTTTAGTGGCGCAGCTAACGCATTAAGTTGACCGCCTGGGGAGTACGGCCGCAAGGTTAAAACTCAAATGAATTGACGGGGGCCCGCACAAGCGGTGGAGCATGTGGTTTAATTCGAAGCAACGCGAAGAACCTTACCAGGCCTTGACATGCAGAGAACTTTCCAGAGATGGATTGGTGCCTTCGGGAGCTCTGACACAGGTGCTGCATGGCTGTCGTCAGCTCGTGTCGTGAGATGTTGGGTTAAGTCCCGTAACGA	2592	0	2397	1005	0	382	157	1961	117	225	0	1142	1491	0	0	0	0	735	223	1566	301	401	217	0	503	0	0	294	307	0	0	108	2254	0	1364	0	93	0	0	0	86	1629	1858	67	714	0
2469c70f2fb0f1d1da6cc90dbc0f4121	bASV11	d__Bacteria; p__Proteobacteria; c__Gammaproteobacteria; o__Pseudomonadales; f__Moraxellaceae; g__Acinetobacter	GTAGTCCATGCCGTAAACGATGTCTACTAGCCGTTGGGGCCTTTGAGGCTTTAGTGGCGCAGCTAACGCGATAAGTAGACCGCCTGGGGAGTACGGTCGCAAGACTAAAACTCAAATGAATTGACGGGGGCCCGCACAAGCGGTGGAGCATGTGGTTTAATTCGATGCAACGCGAAGAACCTTACCTGGTCTTGACATAGTAAGAACTTTCCAGAGATGGATTGGTGCCTTCGGGAACTTACATACAGGTGCTGCATGGCTGTCGTCAGCTCGTGTCGTGAGATGTTGGGTTAAGTCCCGCAACGA	100	0	62	278	0	43	54	358	274	0	45	0	0	71	298	0	735	32	0	344	112	929	3870	0	4175	423	1820	0	3068	235	0	69	82	31	135	469	29	15	0	532	105	104	638	389	38	1039
0aea64e207a9bdfb61483f4def68e499	bASV12	d__Bacteria; p__Proteobacteria; c__Alphaproteobacteria; o__Rhizobiales; f__Rhizobiaceae; g__Allorhizobium-Neorhizobium-Pararhizobium-Rhizobium	GTAGTCCACGCCGTAAACGATGAATGTTAGCCGTCGGGCAGTATACTGTTCGGTGGCGCAGCTAACGCATTAAACATTCCGCCTGGGGAGTACGGTCGCAAGATTAAAACTCAAAGGAATTGACGGGGGCCCGCACAAGCGGTGGAGCATGTGGTTTAATTCGAAGCAACGCGCAGAACCTTACCAGCTCTTGACATTCGGGGTATGGGCATTGGAGACGATGTCCTTCAGTTAGGCTGGCCCCAGAACAGGTGCTGCATGGCTGTCGTCAGCTCGTGTCGTGAGATGTTGGGTTAAGTCCCGCAA	605	8245	3703	272	0	136	32	209	73	80	0	829	336	87	385	0	0	193	0	91	96	155	115	122	162	0	0	0	230	165	0	74	243	78	259	0	109	456	0	33	44	43	120	63	1610	0
21b5c2f4fa1a2e682f78ea6cf1447b44	bASV13	d__Bacteria; p__Proteobacteria; c__Gammaproteobacteria; o__Enterobacterales; f__Enterobacteriaceae	GTAGTCCACGCCGTAAACGATGTCGACTTGGAGGTTGTTCCCTTGAGGAGTGGCTTCCGGAGCTAACGCGTTAAGTCGACCGCCTGGGGAGTACGGCCGCAAGGTTAAAACTCAAATGAATTGACGGGGGCCCGCACAAGCGGTGGAGCATGTGGTTTAATTCGATGCAACGCGAAGAACCTTACCTACTCTTGACATCCAGAGAACTTTCCAGAGATGGATTGGTGCCTTCGGGAACTCTGAGACAGGTGCTGCATGGCTGTCGTCAGCTCGTGTTGTGAAATGTTGGGTTAAGTCCCGCAACGA	1457	1571	9641	131	0	83	339	106	68	65	0	2051	181	0	670	0	2934	742	50	558	531	728	944	105	546	624	0	0	238	188	75	98	0	81	0	0	60	0	0	0	0	49	0	0	3102	38
0afc3bbe6d15d90f828602bd3bc00f68	bASV14	d__Bacteria; p__Proteobacteria; c__Gammaproteobacteria; o__Pseudomonadales; f__Moraxellaceae; g__Acinetobacter	GTAGTCCATGCCGTAAACGATGTCTACTAGCCGTTGGGGCCTTTGAGGCTTTAGTGGCGCAGCTAACGCGATAAGTAGACCGCCTGGGGAGTACGGTCGCAAGACTAAAACTCAAATGAATTGACGGGGGCCCGCACAAGCGGTGGAGCATGTGGTTTAATTCGATGCAACGCGAAGAACCTTACCTGGTCTTGACATACAGAGAACTTTCCAGAGATGGATTGGTGCCTTCGGGAACTCTGATACAGGTGCTGCATGGCTGTCGTCAGCTCGTGTCGTGAGATGTTGGGTTAAGTCCCGCAACGA	0	0	0	41	0	0	0	0	0	0	0	40	0	52	66	0	187	0	0	0	35	193	135	36	238	0	109	0	222	0	0	0	0	0	0	0	0	0	0	0	0	0	0	0	0	55
1007d8d222bea47f94c3b2314ea3e381	bASV15	d__Bacteria; p__Proteobacteria; c__Alphaproteobacteria; o__Rhizobiales; f__Xanthobacteraceae	GTAGTCCACGCTGTAAACGATGGATGCTAGCCGTTGGCGAGCTTGCTCGTCAGTGGCGCAGCTAACGCTTTAAGCATCCCGCCTGGGGAGTACGGTCGCAAGATTAAAACTCAAAGGAATTGACGGGGGCCCGCACAAGCGGTGGAGCATGTGGTTCAATTCGAAGCAACGCGCAGAACCTTACCAGCCCTTGACATCCCGGTCGCGGAGAGCAGAGACGCACTCCTTCAGTTCGGCTGGACCGGAGACAGGTGCTGCATGGCTGTCGTCAGCTCGTGTCGTGAGATGTTGGGTTAAGTCCCGCAA	80	0	0	831	21077	17826	1932	900	495	354	0	66	12537	3506	200	0	0	4328	2812	289	1301	5605	8333	2032	1642	0	1502	982	4543	511	551	234	575	743	126	3562	407	66	0	53	45	740	689	1218	0	642
14c3a2740b8bfff1bf2fead33fbf6ce2	bASV16	d__Bacteria; p__Firmicutes; c__Bacilli; o__Bacillales; f__Bacillaceae; g__Bacillus	GTAGTCCACGCTGTAAACGATGAGTGCTAAGTGTTAGAGGGTTTCCGCCCTTTAGTGCTGAAGTTAACGCATTAAGCACTCCGCCTGGGGAGTACGGTCGCAAGACTGAAACTCAAAGGAATTGACGGGGGCCCGCACAAGTGGTGGAGCATGTGGTTTAATTCGAAGCAACGCGAAGAACCTTACCAGGTCTTGACATCCTCTGACAACCCTAGAGATAGGGCTTTCCCTTCGGGGACAGAGTGACAGGTGGTGCATGGTTGTCGTCAGCTCGTGTCGTGAGATGTTGGGTTAAGTCCCGCAACG	2946	81	4389	9430	1715	9444	3310	7499	4027	1278	1392	1419	10168	451	1931	0	1273	14160	4218	2753	8091	2170	441	850	14913	1257	363	230	3247	0	24	74	1845	4618	205	198	206	27	52	141	80	338	509	540	33322	1124
7832edb2ff9b6a67e3466386066fdbd4	bASV17	d__Bacteria; p__Firmicutes; c__Bacilli; o__Bacillales; f__Bacillaceae; g__Bacillus; s__Bacillus_mycoides	GTAGTCCACGCCGTAAACGATGAGTGCTAAGTGTTAGAGGGTTTCCGCCCTTTAGTGCTGAAGTTAACGCATTAAGCACTCCGCCTGGGGAGTACGGCCGCAAGGCTGAAACTCAAAGGAATTGACGGGGGCCCGCACAAGCGGTGGAGCATGTGGTTTAATTCGAAGCAACGCGAAGAACCTTACCAGGTCTTGACATCCTCTGAAAACTCTAGAGATAGAGCTTCTCCTTCGGGAGCAGAGTGACAGGTGGTGCATGGTTGTCGTCAGCTCGTGTCGTGAGATGTTGGGTTAAGTCCCGCAACG	203	0	113	3789	656	767	10295	1929	3571	7437	5790	166	8199	294	4160	0	4060	2930	20705	3164	6607	3729	0	0	14240	846	0	0	0	0	0	0	289	1261	1749	0	55	0	0	0	0	0	0	0	3783	418
c392ceb6309d70d6305c9262d8a0d466	bASV18	d__Bacteria; p__Proteobacteria; c__Gammaproteobacteria; o__Burkholderiales; f__Comamonadaceae; g__Comamonas; s__Comamonas_testosteroni	GTAGTCCACGCCCTAAACGATGTCAACTGGTTGTTGGGTCTTAACTGACTCAGTAACGAAGCTAACGCGTGAAGTTGACCGCCTGGGGAGTACGGCCGCAAGGTTGAAACTCAAAGGAATTGACGGGGACCCGCACAAGCGGTGGATGATGTGGTTTAATTCGATGCAACGCGAAAAACCTTACCCACCTTTGACATGGCAGGAACTTACCAGAGATGGTTTGGTGCTCGAAAGAGAACCTGCACACAGGTGCTGCATGGCTGTCGTCAGCTCGTGTCGTGAGATGTTGGGTTAAGTCCCGCAACG	930	632	1053	122	0	115	0	471	51	51	22	168	47	37	218	0	121	305	0	831	27	167	43	0	1487	192	0	39	89	0	0	14	50	20	117	0	616	25	0	81	39	207	107	78	143	47
30edf8a331accc647f746969515f0509	bASV19	d__Bacteria; p__Proteobacteria; c__Gammaproteobacteria; o__Xanthomonadales; f__Xanthomonadaceae; g__Stenotrophomonas	GTAGTCCACGCCCTAAACGATGCGAACTGGATGTTGGGTGCAATTTGGCACGCAGTATCGAAGCTAACGCGTTAAGTTCGCCGCCTGGGGAGTACGGTCGCAAGACTGAAACTCAAAGGAATTGACGGGGGCCCGCACAAGCGGTGGAGTATGTGGTTTAATTCGATGCAACGCGAAGAACCTTACCTGGCCTTGACATGTCGAGAACTTTCCAGAGATGGATTGGTGCCTTCGGGAACTCGAACACAGGTGCTGCATGGCTGTCGTCAGCTCGTGTCGTGAGATGTTGGGTTAAGTCCCGCAACG	490	1652	464	142	369	248	123	288	131	120	52	1578	434	181	663	142	431	364	137	2370	141	289	494	144	200	207	106	135	303	172	66	77	164	61	785	153	159	43	0	35	0	0	0	20	162	37
683bba9beb1ad7b6d6085eb735241ca4	bASV20	d__Bacteria; p__Proteobacteria; c__Gammaproteobacteria; o__Enterobacterales; f__Enterobacteriaceae; g__Enterobacter	GTAGTCCACGCCGTAAACGATGTCGATTTGGAGGTTGTTCCCTTGAGGAGTGGCTTCCGGAGCTAACGCGTTAAATCGACCGCCTGGGGAGTACGGCCGCAAGGTTAAAACTCAAATGAATTGACGGGGGCCCGCACAAGCGGTGGAGCATGTGGTTTAATTCGATGCAACGCGAAGAACCTTACCTACTCTTGACATCCAGAGAACTTTCCAGAGATGGATTGGTGCCTTCGGGAACTCTGAGACAGGTGCTGCATGGCTGTCGTCAGCTCGTGTTGTGAAATGTTGGGTTAAGTCCCGCAACGA	1914	0	1228	0	6172	0	0	51	0	0	0	597	147	52	146	0	0	238	0	816	0	66	117	0	38	0	45	312	129	0	0	0	0	0	0	0	0	0	0	0	0	0	0	0	0	0
5a0a27dbc8c5416c2f20d477a38d562d	bASV21	d__Bacteria; p__Firmicutes; c__Bacilli; o__Bacillales; f__Bacillaceae; g__Bacillus	GTAGTCCACGCCGTAAACGATGAGTGCTAAGTGTTAGAGGGTTTCCGCCCTTTAGTGCTGCAGCTAACGCATTAAGCACTCCGCCTGGGGAGTACGGCCGCAAGGCTGAAACTCAAAGGAATTGACGGGGGCCCGCACAAGCGGTGGAGCATGTGGTTTAATTCGAAGCAACGCGAAGAACCTTACCAGGTCTTGACATCCTCTGACACTCCTAGAGATAGGACGTTCCCCTTCGGGGGACAGAGTGACAGGTGGTGCATGGTTGTCGTCAGCTCGTGTCGTGAGATGTTGGGTTAAGTCCCGCAA	1884	245	6557	11280	380	3132	1088	9299	8529	1766	868	762	4860	357	6073	0	1604	15348	1487	4901	8473	7497	0	351	14304	3348	0	0	803	0	0	62	2274	5852	232	0	196	101	64	354	144	494	489	429	13838	664
84bf4074788ef3449d068c5697eafc07	bASV22	d__Bacteria; p__Proteobacteria; c__Alphaproteobacteria; o__Sphingomonadales; f__Sphingomonadaceae; g__Sphingobium; s__Sphingobium_yanoikuyae	GTAGTCCACGCCGTAAACGATGATAACTAGCTGTCAGGGCACATGGTGTTTTGGTGGCGCAGCTAACGCATTAAGTTATCCGCCTGGGGAGTACGGTCGCAAGATTAAAACTCAAAGGAATTGACGGGGGCCTGCACAAGCGGTGGAGCATGTGGTTTAATTCGAAGCAACGCGCAGAACCTTACCAACGTTTGACATCCCTATCGCGGATCGTGGAGACACTTTCCTTCAGTTCGGCTGGATAGGTGACAGGTGCTGCATGGCTGTCGTCAGCTCGTGTCGTGAGATGTTGGGTTAAGTCCCGCA	2182	455	2057	4582	531	2063	648	4879	282	275	2169	2045	97	52	239	0	0	353	27	86	29	130	519	77	356	211	419	40	1085	302	474	858	1220	0	924	1463	33	379	0	113	442	108	158	153	175	117
c4c8e63bc7dfae18aff9954821f5e194	bASV23	d__Bacteria; p__Proteobacteria; c__Alphaproteobacteria; o__Sphingomonadales; f__Sphingomonadaceae; g__Sphingomonas	GTAGTCCACGCCGTAAACGATGATGACTAGCTGTCGGGGCTCATGGAGTTTCGGTGGCGCAGCTAACGCGTTAAGTCATCCGCCTGGGGAGTACGGCCGCAAGGTTAAAACTCAAAGAAATTGACGGGGGCCTGCACAAGCGGTGGAGCATGTGGTTTAATTCGAAGCAACGCGCAGAACCTTACCAGCGTTTGACATGGTAGGACGGTTTCCAGAGATGGATTCCTTCCCTTACGGGACCTACACACAGGTGCTGCATGGCTGTCGTCAGCTCGTGTCGTGAGATGTTGGGTTAAGTCCCGCAAC	5398	1306	4730	427	2633	1009	0	720	257	771	744	1542	590	1064	1949	30	0	2187	129	227	744	419	1283	142	702	1239	413	418	3280	6968	1441	3252	899	934	3198	3675	579	80	1435	3940	2231	1131	2504	3041	3305	838
faa22a6d33747be7dc54eafbfce9db65	bASV24	d__Bacteria; p__Proteobacteria; c__Gammaproteobacteria; o__Enterobacterales	GTAGTCCACGCTGTAAACGATGTCGATTTGGAGGTTGTGCCCTTGAGGCGTGGCTTCCGGAGCTAACGCGTTAAATCGACCGCCTGGGGAGTACGGCCGCAAGGTTAAAACTCAAATGAATTGACGGGGGCCCGCACAAGCGGTGGAGCATGTGGTTTAATTCGATGCAACGCGAAGAACCTTACCTACTCTTGACATCCAGAGAACTTTCCAGAGATGGATTGGTGCCTTCGGGAACTCTGAGACAGGTGCTGCATGGCTGTCGTCAGCTCGTGTTGTGAAATGTTGGGTTAAGTCCCGCAACGA	0	281	281	0	0	73	51	70	25	20	52	245	0	0	55	0	0	0	76	317	71	145	66	0	34	0	0	0	0	0	0	0	0	0	0	0	35	0	0	0	0	0	0	0	0	0
87d74187b8b9e5438b008aa98adcdfd0	bASV25	d__Bacteria; p__Proteobacteria; c__Gammaproteobacteria; o__Burkholderiales; f__Burkholderiaceae; g__Ralstonia	GTAGTCCACGCCCTAAACGATGTCAACTAGTTGTTGGGGATTCATTTCCTTAGTAACGTAGCTAACGCGTGAAGTTGACCGCCTGGGGAGTACGGTCGCAAGATTAAAACTCAAAGGAATTGACGGGGACCCGCACAAGCGGTGGATGATGTGGATTAATTCGATGCAACGCGAAAAACCTTACCTACCCTTGACATGCCACTAACGAAGCAGAGATGCATTAGGTGCTCGAAAGAGAAAGTGGACACAGGTGCTGCATGGCTGTCGTCAGCTCGTGTCGTGAGATGTTGGGTTAAGTCCCGCAAC	74	0	65	62	177	120	27	117	46	0	0	37	304	50	82	0	0	162	48	34	56	71	280	177	62	0	41	53	193	0	164	121	0	36	52	107	4183	1443	82	195	102	75	133	147	178	90
598466156fea3b9ccd6bb9cd2ccf79b3	bASV26	d__Bacteria; p__Proteobacteria; c__Alphaproteobacteria; o__Rhizobiales; f__Methyloligellaceae	GTAGTCCACGCCGTAAACTATGGGTGCTAGCCGTCGGTCGGCATGCCGGTCGGTGGCGCAGCCAACGCATTAAGCACCCCGCCTGGGGAGTACGGTCGCAAGATTAAAACTCAAAGGAATTGACGGGGGCCCGCACAAGCGGTGGAGCATGTGGTTTAATTCGAGGCAACGCGAAGAACCTTACCAGCCCTTGACTTCCCGATCGGGGCTCCAGAGACGGAGCTCTTCAATTGGTCGGTGACAGGTGCTGCATGGCTGTCGTCAGCTCGTGTCGTGAGATGTTGGGTTAAGTCCCGCAACGAGCGC	3813	665	3815	13680	1292	5012	2435	19631	8160	7294	4957	1566	3603	4225	2725	92	6141	24811	3149	3865	10092	5207	665	117	6733	3408	920	815	5584	1331	545	942	4198	5647	1416	1980	0	0	250	767	986	1063	1795	2242	3544	3090
08a33b20ec09574c80165bf7c80a3100	bASV27	d__Bacteria; p__Actinobacteriota; c__Actinobacteria; o__Corynebacteriales; f__Mycobacteriaceae; g__Mycobacterium	GTAGTCCACGCCGTAAACGGTGGGTACTAGGTGTGGGTTTCCTTCCTTGGGATCCGTGCCGTAGCTAACGCATTAAGTACCCCGCCTGGGGAGTACGGCCGCAAGGCTAAAACTCAAAGGAATTGACGGGGGCCCGCACAAGCGGCGGAGCATGTGGATTAATTCGATGCAACGCGAAGAACCTTACCTGGGTTTGACATGCACAGGACGCCGGCAGAGATGTCGGTTCCCTTGTGGCCTGTGTGCAGGTGGTGCATGGCTGTCGTCAGCTCGTGTCGTGAGATGTTGGGTTAAGTCCCGCAACGA	2636	553	3182	2127	2377	1654	363	3486	1246	1168	1232	899	766	717	988	0	2456	3262	470	1167	1632	1336	4955	867	1296	2275	1019	914	4770	1628	721	881	639	958	2045	3908	1169	373	1205	2925	3167	2894	3157	5252	1546	647
1d6d77ca7bc08da9c6c1d3526d7c0c26	bASV28	d__Bacteria; p__Proteobacteria; c__Alphaproteobacteria; o__Rhizobiales; f__Xanthobacteraceae; g__uncultured	GTAGTCCACGCCATAAACGATGGATGCTAGCCGTTGGTGGGTTTACCCTTCAGTGGCGCAGCTAACGCATTAAGCATCCCGCCTGGGGAGTACGGTCGCAAGATTAAAACTCAAAGGAATTGACGGGGGCCCGCACAAGCGGTGGAGCATGTGGTTCAATTCGAAGCAACGCGAAGAACCTTACCAGCCTTTGACATCCCGGTCGCGAGCACCAGAGATGGAGCTCTTCAGTTCGGCTGGACCGGAGACAGGTGCTGCATGGCTGTCGTCAGCTCGTGTCGTGAGATGTTGGGTTAAGTCCCGCAA	0	0	0	1011	1686	1618	702	1288	688	190	0	0	1787	118	102	0	0	5795	875	519	487	808	944	139	502	0	0	0	90	0	95	47	644	681	0	626	335	292	0	0	0	0	108	111	580	497
f429e5c0bbb1b63efec4340c92c00502	bASV29	d__Bacteria; p__Proteobacteria; c__Alphaproteobacteria; o__Rhizobiales; f__Rhizobiaceae; g__Ensifer	GTAGTCCACGCCGTAAACGATGAATGTTAGCCGTCGGGCAGTTTACTGTTCGGTGGCGCAGCTAACGCATTAAACATTCCGCCTGGGGAGTACGGTCGCAAGATTAAAACTCAAAGGAATTGACGGGGGCCCGCACAAGCGGTGGAGCATGTGGTTTAATTCGAAGCAACGCGCAGAACCTTACCAGCCCTTGACATCCCGATCGCGGATTACGGAGACGTTTTCCTTCAGTTCGGCTGGATCGGAGACAGGTGCTGCATGGCTGTCGTCAGCTCGTGTCGTGAGATGTTGGGTTAAGTCCCGCAA	4024	3366	6585	175	497	493	92	247	100	608	373	2992	326	346	2113	88	0	400	119	155	192	248	631	278	251	523	78	158	554	903	428	466	202	216	1368	413	771	68	416	897	574	136	242	146	3665	189
2cbbebec77e79fb10f461f716036a36d	bASV30	d__Bacteria; p__Proteobacteria; c__Gammaproteobacteria; o__Pseudomonadales; f__Moraxellaceae; g__Acinetobacter	GTAGTCCATGCCGTAAACGATGTCTACTAGCCGTTGGGGCCTTTGAGGCTTTAGTGGCGCAGCTAACGCGATAAGTAGACCGCCTGGGGAGTACGGTCGCAAGACTAAAACTCAAATGAATTGACGGGGGCCCGCACAAGCGGTGGAGCATGTGGTTTAATTCGATGCAACGCGAAGAACCTTACCTGGCCTTGACATAGTAAGAACTTTCCAGAGATGGATTGGTGCCTTCGGGAACTTACATACAGGTGCTGCATGGCTGTCGTCAGCTCGTGTCGTGAGATGTTGGGTTAAGTCCCGCAACGA	377	55	82	0	0	0	0	0	0	28	0	293	0	0	0	0	0	0	0	0	0	600	0	52	0	0	0	0	147	0	0	0	0	0	0	0	0	0	0	0	0	0	0	0	0	0
eb4737fd50d62fdcc1d7f4ad41c42db0	bASV32	d__Bacteria; p__Proteobacteria; c__Alphaproteobacteria; o__Rhizobiales; f__Methyloligellaceae; g__uncultured	GTAGTCCACGCCGTAAACTATGGGTGCTAGCCGTCGGGGAGCATGCTCTTCGGTGGCGCAGCAAACGCATTAAGCACCCCGCCTGGGGAGTACGGTCGCAAGATTAAAACTCAAAGGAATTGACGGGGGCCCGCACAAGCGGTGGAGCATGTGGTTTAATTCGAGGCAACGCGAAGAACCTTACCAGCCCTTGACTTCCCGATCGGGGGACCAGAGATGGACCTCTTCAATTGGTCGGTGACAGGTGCTGCATGGCTGTCGTCAGCTCGTGTCGTGAGATGTTGGGTTAAGTCCCGCAACGAGCGC	2486	526	2379	7496	0	5336	2976	11001	4788	2313	1279	1280	7039	3906	1449	0	4002	15451	4364	3056	4679	4426	504	133	3571	2157	633	525	2997	563	256	459	2134	2778	594	708	0	13	933	2456	3273	1522	3020	3553	568	1920
eabc38444f35d77f447ec8f5a242460c	bASV33	d__Bacteria; p__Proteobacteria; c__Alphaproteobacteria; o__Rhizobiales; f__Xanthobacteraceae; g__Pseudolabrys	GTAGTCCACGCCGTAAACGATGGATGCTAGCCGTTGGCGAGCTTGCTCGTCAGTGGCGCAGCTAACGCTTTAAGCATCCCGCCTGGGGAGTACGGTCGCAAGATTAAAACTCAAAGGAATTGACGGGGGCCCGCACAAGCGGTGGAGCATGTGGTTCAATTCGAAGCAACGCGCAGAACCTTACCAGCCCTTGACATGTCCTCTATGGATTCCAGAGACGGAGTCCTTCACTTCGGGTGGGAGGAACACAGGTGCTGCATGGCTGTCGTCAGCTCGTGTCGTGAGATGTTGGGTTAAGTCCCGCAA	2760	377	2243	3588	0	2686	686	4834	1994	1195	544	1324	3609	1544	666	0	1587	8335	801	1042	3589	2828	331	111	3372	2258	702	686	6173	6130	2244	6228	1371	1888	1181	602	0	16	372	924	836	1335	2437	3149	521	889
43a69ba85ef551fc0be25499aae3c249	bASV34	d__Bacteria; p__Proteobacteria; c__Gammaproteobacteria; o__Pseudomonadales; f__Pseudomonadaceae; g__Pseudomonas	GTAGTCCACGCCGTAAACGATGTCAACTAGCCGTTGGGAGCCTTGAGCTCTTAGTGGCGCAGCTAACGCATTAAGTTGACCGCCTGGGGAGTACGGCCGCAAGGTTAAAACTCAAATGAATTGACGGGGGCCCGCACAAGCGGTGGAGCATGTGGTTTAATTCGAAGCAACGCGAAGAACCTTACCAGGCCTTGACATCCAATGAACTTTCCAGAGATGGATTGGTGCCTTCGGGAACATTGAGACAGGTGCTGCATGGCTGTCGTCAGCTCGTGTCGTGAGATGTTGGGTTAAGTCCCGTAACGA	40	0	0	42	0	304	70	106	60	393	160	629	156	138	1466	0	1968	145	117	139	695	656	41	31	1146	446	0	0	140	0	17	0	117	0	120	0	184	0	0	0	0	0	0	5	103	177
71332c3f08dd47c402e5ea4a5cb0e2d7	bASV35	d__Bacteria; p__Proteobacteria; c__Alphaproteobacteria; o__Rhizobiales; f__Xanthobacteraceae; g__Pseudolabrys	GTAGTCCACGCTGTAAACGATGGATGCTAGCCGTTGGCGAGCTTGCTCGTCAGTGGCGCAGCTAACGCTTTAAGCATCCCGCCTGGGGAGTACGGTCGCAAGATTAAAACTCAAAGGAATTGACGGGGGCCCGCACAAGCGGTGGAGCATGTGGTTCAATTCGAAGCAACGCGCAGAACCTTACCAGCCCTTGACATGTCCTCTATGGATTCCAGAGACGGAGTCCTTCACTTCGGGTGGGAGGAACACAGGTGCTGCATGGCTGTCGTCAGCTCGTGTCGTGAGATGTTGGGTTAAGTCCCGCAA	270	261	2040	12105	1060	7633	1063	16875	6540	3246	1335	115	10801	3726	2622	0	3612	32270	1541	2416	8919	7384	415	91	8073	3554	716	736	7763	0	553	580	4872	7883	518	565	60	0	0	0	0	680	1071	1625	2651	2305
8425e78d58de68696718eb6d1bce4138	bASV36	d__Bacteria; p__Proteobacteria; c__Gammaproteobacteria; o__Enterobacterales; f__Enterobacteriaceae	GTAGTCCACGCTGTAAACGATGTCGACTTGGAGGTTGTTCCCTTGAGGAGTGGCTTCCGGAGCTAACGCGTTAAGTCGACCGCCTGGGGAGTACGGCCGCAAGGTTAAAACTCAAATGAATTGACGGGGGCCCGCACAAGCGGTGGAGCATGTGGTTTAATTCGATGCAACGCGAAGAACCTTACCTACTCTTGACATCCAGAGAACTTAGCAGAGATGCTTTGGTGCCTTCGGGAACTCTGAGACAGGTGCTGCATGGCTGTCGTCAGCTCGTGTTGTGAAATGTTGGGTTAAGTCCCGCAACGA	3130	3552	19385	0	0	0	0	0	0	0	0	3349	0	0	2023	0	0	0	0	271	0	0	0	0	0	0	0	0	255	0	0	0	0	0	0	0	0	0	0	144	0	0	0	0	485	0
074d76e66413bb13f340065bf05bf32c	bASV37	d__Bacteria; p__Proteobacteria; c__Alphaproteobacteria; o__Rhizobiales; f__Rhizobiaceae; g__Allorhizobium-Neorhizobium-Pararhizobium-Rhizobium	GTAGTCCACGCCGTAAACGATGAATGTTAGCCGTCGGGCAGTATACTGTTCGGTGGCGCAGCTAACGCATTAAACATTCCGCCTGGGGAGTACGGTCGCAAGATTAAAACTCAAAGGAATTGACGGGGGCCCGCACAAGCGGTGGAGCATGTGGTTTAATTCGAAGCAACGCGCAGAACCTTACCAGCCCTTGACATGTCCGGCTACTTGCAGAGATGCAAGGTTCCCTTCGGGGACCGGAACACAGGTGCTGCATGGCTGTCGTCAGCTCGTGTCGTGAGATGTTGGGTTAAGTCCCGCAACGAG	968	550	2324	161	749	615	45	417	124	953	149	860	1048	778	428	0	0	1950	128	201	420	623	2295	198	408	0	214	202	2287	990	834	727	299	278	488	1582	1012	40	0	135	49	627	1564	944	638	241
5a3eb05607a1c0d7722854b1d986c43b	bASV38	d__Bacteria; p__Proteobacteria; c__Alphaproteobacteria; o__Rhizobiales; f__Xanthobacteraceae; g__Bradyrhizobium	GTAGTCCACGCCGTAAACGATGAATGCCAGCCGTTAGTGGGTTTACTCACTAGTGGCGCAGCTAACGCTTTAAGCATTCCGCCTGGGGAGTACGGTCGCAAGATTAAAACTCAAAGGAATTGACGGGGGCCCGCACAAGCGGTGGAGCATGTGGTTTAATTCGACGCAACGCGCAGAACCTTACCAGCCCTTGACATGTCCAGGACCGGTCGCAGAGATGTGACCTTCTCTTCGGAGCCTGGAACACAGGTGCTGCATGGCTGTCGTCAGCTCGTGTCGTGAGATGTTGGGTTAAGTCCCGCAACG	0	0	113	908	3366	943	954	1720	717	916	192	0	1607	539	314	0	2708	857	1256	1127	658	1125	2482	793	616	812	218	230	1455	548	235	190	438	266	538	1337	4710	2598	0	0	0	1013	1147	1509	347	200
eae0667baccbe70ad263a652b5ed6628	bASV39	d__Bacteria; p__Proteobacteria; c__Gammaproteobacteria; o__Burkholderiales; f__Burkholderiaceae; g__Cupriavidus	GTAGTCCACGCCCTAAACGATGTCAACTAGTTGTTGGGGATTCATTTCTTCAGTAACGTAGCTAACGCGTGAAGTTGACCGCCTGGGGAGTACGGTCGCAAGATTAAAACTCAAAGGAATTGACGGGGACCCGCACAAGCGGTGGATGATGTGGATTAATTCGATGCAACGCGAAAAACCTTACCTACCCTTGACATGCCACTAACGAAGCAGAGATGCATTAGGTGCCCGAAAGGGAAAGTGGACACAGGTGCTGCATGGCTGTCGTCAGCTCGTGTCGTGAGATGTTGGGTTAAGTCCCGCAAC	1568	245	1055	294	1248	1714	286	451	237	169	336	379	1351	602	557	0	0	1034	184	371	1394	428	2321	790	2197	1438	407	291	1289	972	677	447	170	144	269	804	3162	159	63	178	102	460	625	793	323	406
5492ea5971344061bd1f767c2c24b6cd	bASV40	d__Bacteria; p__Proteobacteria; c__Alphaproteobacteria; o__Rhizobiales; f__Rhizobiaceae; g__Allorhizobium-Neorhizobium-Pararhizobium-Rhizobium	GTAGTCCACGCCGTAAACGATGAATGTTAGCCGTCGGGCAGTATACTGTTCGGTGGCGCAGCTAACGCATTAAACATTCCGCCTGGGGAGTACGGTCGCAAGATTAAAACTCAAAGGAATTGACGGGGGCCCGCACAAGCGGTGGAGCATGTGGTTTAATTCGAAGCAACGCGCAGAACCTTACCAGCCCTTGACATGCCCGGCTACTTGCAGAGATGCAAGGTTCCCTTCGGGGACCGGGACACAGGTGCTGCATGGCTGTCGTCAGCTCGTGTCGTGAGATGTTGGGTTAAGTCCCGCAACGAG	164	563	346	618	1827	923	114	966	368	11225	300	87	515	241	795	0	2055	2080	79	1061	3480	889	302	64	1647	523	535	187	1110	0	135	137	430	201	477	301	809	435	93	99	71	529	542	590	2406	703
8153c0a9287bc41e8a3e1e3095e61a94	bASV41	d__Bacteria; p__Proteobacteria; c__Alphaproteobacteria; o__Rhizobiales; f__Rhizobiales_Incertae_Sedis; g__Nordella	GTAGTCCACGCCGTAAACTATGGGTGCTAGCTGTCAGCGGGCTTGCTCGTTGGTGGCGCAGCTAACGCATTAAGCACCCCGCCTGGGGAGTACGGTCGCAAGATTAAAACTTAAAGGAATTGACGGGGGCCCGCACAAGCGGTGGAGCATGTGGTTTAATTCGAAGCAACGCGCAGAACCTTACCAACCCTTGACATCCCGGTCGCGGACACCAGAGATGGAGTCCTTCAGTTCGGCTGGACCGGAGACAGGTGCTGCATGGCTGTCGTCAGCTCGTGTCGTGAGATGTTGGGTTAAGTCCCGCAA	875	402	1356	1822	1758	1879	191	2120	1397	844	800	640	2639	872	472	0	510	4831	346	625	1301	271	2708	142	930	803	347	260	839	1707	919	1759	929	1214	1441	1284	2170	1007	634	1605	1166	497	1088	1828	1984	1130
c95900447d0227492e9f3b075b723b5e	bASV42	d__Bacteria; p__Proteobacteria; c__Gammaproteobacteria; o__Burkholderiales; f__Comamonadaceae; g__Roseateles; s__Roseateles_depolymerans	GTAGTCCACGCCCTAAACGATGTCAACTGGTTGTTGGGAGGGTTTCTTCTCAGTAACGTAGCTAACGCGTGAAGTTGACCGCCTGGGGAGTACGGCCGCAAGGTTGAAACTCAAAGGAATTGACGGGGACCCGCACAAGCGGTGGATGATGTGGTTTAATTCGATGCAACGCGAAAAACCTTACCTACCCTTGACATGCCAGGAATCTTGCAGAGATGTGAGAGTGCTCGAAAGAGAACCTGGACACAGGTGCTGCATGGCCGTCGTCAGCTCGTGTCGTGAGATGTTGGGTTAAGTCCCGCAACG	95	302	0	201	0	64	0	61	30	0	0	114	17	0	680	0	0	29	0	82	0	75	70	64	174	0	58	34	81	0	0	0	236	0	96	0	245	34	0	0	0	102	0	45	0	0
3a3a7661bb267b167b7ab18e4fb37e22	bASV43	d__Bacteria; p__Proteobacteria; c__Gammaproteobacteria; o__Aeromonadales; f__Aeromonadaceae; g__Aeromonas	GTAGTCCACGCCGTAAACGATGTCGATTTGGAGGCTGTGTCCTTGAGACGTGGCTTCCGGAGCTAACGCGTTAAATCGACCGCCTGGGGAGTACGGCCGCAAGGTTAAAACTCAAATGAATTGACGGGGGCCCGCACAAGCGGTGGAGCATGTGGTTTAATTCGATGCAACGCGAAGAACCTTACCTGGCCTTGACATGTCTGGAATCCTGTAGAGATACGGGAGTGCCTTCGGGAATCAGAACACAGGTGCTGCATGGCTGTCGTCAGCTCGTGTCGTGAGATGTTGGGTTAAGTCCCGCAACGA	222	756	865	0	0	0	0	25	0	8	0	100	96	17	203	0	0	52	0	0	18	78	216	23	239	0	261	1569	2363	226	0	1189	63	0	79046	0	13	0	0	40	7	31	90	39	434	110
d9a1eab27dd6d5029e87b8284f88783d	bASV44	d__Bacteria; p__Proteobacteria; c__Gammaproteobacteria; o__Pseudomonadales; f__Pseudomonadaceae; g__Pseudomonas	GTAGTCCACGCCGTAAACGATGTCAACTAGCCGTTGGGTTCCTTGAGAACTTAGTGGCGCAGCTAACGCATTAAGTTGACCGCCTGGGGAGTACGGCCGCAAGGTTAAAACTCAAATGAATTGACGGGGGCCCGCACAAGCGGTGGAGCATGTGGTTTAATTCGAAGCAACGCGAAGAACCTTACCTGGCCTTGACATGCTGAGAACTTTCCAGAGATGGATTGGTGCCTTCGGGAGCTCAGACACAGGTGCTGCATGGCTGTCGTCAGCTCGTGTCGTGAGATGTTGGGTTAAGTCCCGTAACGA	0	0	0	0	0	87	0	0	0	0	0	0	308	0	0	0	0	692	0	170	0	95	0	0	148	0	0	0	573	0	778	69	1713	0	0	0	0	0	0	0	0	0	0	0	0	0
c50970695028048b10ecb2e7d043ac64	bASV45	d__Bacteria; p__Proteobacteria; c__Alphaproteobacteria; o__Reyranellales; f__Reyranellaceae; g__Reyranella	GTAGTCCACGCCGTAAACGATGGGTGCTAGACGTTGGCGAGCTTGCTCGTCAGTGTCGCAGCTAACGCGTTAAGCACCCCGCCTGGGGAGTACGGCCGCAAGGTTGAAACTCAAAGGAATTGACGGGGGCCCGCACAAGCGGTGGAGCATGTGGTTCAATTCGACGCAACGCGCAGAACCTTACCAGCCCTTGACATGGGACTCGCCGGGAGCAGAGACGCTCCCTTCGGTTCGGCCGGAGTCCGCACAGGTGCTGCATGGCTGTCGTCAGCTCGTGTCGTGAGATGTTGGGTTAAGTCCCGCAAC	1246	335	1048	1788	1859	1236	289	2423	1215	2317	815	460	2022	597	1119	0	2340	4405	484	626	2168	1603	1293	218	1832	2017	362	298	2355	1172	605	774	838	744	1348	982	808	227	496	1275	656	753	1146	1495	3253	820
b9549b4a3e45e09646232af9c6ec9c18	bASV46	d__Bacteria; p__Proteobacteria; c__Alphaproteobacteria; o__Rhizobiales; f__Xanthobacteraceae; g__uncultured	GTAGTCCACGCCGTAAACGATGGATGCTAGCCGTTGGTGGGTTTACCCTTCAGTGGCGCAGCTAACGCATTAAGCATCCCGCCTGGGGAGTACGGTCGCAAGATTAAAACTCAAAGGAATTGACGGGGGCCCGCACAAGCGGTGGAGCATGTGGTTCAATTCGAAGCAACGCGAAGAACCTTACCAGCCTTTGACATCCCGGTCGCGAGCACCAGAGATGGAGCTCTTCAGTTCGGCTGGACCGGAGACAGGTGCTGCATGGCTGTCGTCAGCTCGTGTCGTGAGATGTTGGGTTAAGTCCCGCAA	153	0	313	5083	0	1969	1234	8104	2827	1676	1104	95	3252	1148	1077	0	3768	12739	1947	1895	3547	3378	1740	212	2749	2221	997	646	5665	341	295	260	1572	1712	198	2548	0	0	113	258	254	576	780	1728	1601	850
2186581162544a7f65ef34ed4de73070	bASV47	d__Bacteria; p__Actinobacteriota; c__Thermoleophilia; o__Gaiellales; f__Gaiellaceae; g__Gaiella	GTAGTCCACGCCGTAAACGATGGGTGCTAGGTGTGGGAGGTGTCGACTCCTTCCGTGCCGTAGCTAACGCATTAAGCACCCCGCCTGGGGAGTACGGCCGCAAGGCTAAAACTCAAAGGAATTGACGGGGCCCCGCACAAGCAGCGGAGCATGTGGTTTAATTCGATGCAACGCGAAGAACCTTACCAGGGCTTGACATGCACTGGAAATCCGTAGAAATACGGCCCTCCTTCGGGACCAGTGCACAGGTGGTGCATGGCTGTCGTCAGCTCGTGTCGTGAGATGTTGGGTTAAGTCCCGCAACGA	2550	402	1882	610	582	846	271	910	308	1017	757	1003	1010	1132	1845	0	0	3517	269	272	765	851	1422	75	895	1034	993	792	4287	1787	1012	1381	955	1170	1720	3110	35	0	1509	3508	2847	1937	3306	5688	1608	713
f31b065dce77e593ebcc5bc4789310b9	bASV48	d__Bacteria; p__Firmicutes; c__Bacilli; o__Bacillales; f__Bacillaceae; g__Bacillus	GTAGTCCACGCCGTAAACGATGAGTGCTAAGTGTTAGGGGGTTTCCGCCCCTTAGTGCTGCAGCTAACGCATTAAGCACTCCGCCTGGGGAGTACGGCCGCAAGGCTGAAACTCAAAGGAATTGACGGGGGCCCGCACAAGCGGTGGAGCATGTGGTTTAATTCGAAGCAACGCGAAGAACCTTACCAGGTCTTGACATCCTCTGACACTCCTAGAGATAGGACGTTCCCCTTCGGGGGACAGAGTGACAGGTGGTGCATGGTTGTCGTCAGCTCGTGTCGTGAGATGTTGGGTTAAGTCCCGCAA	247	0	439	7079	0	1779	871	5674	5828	809	279	110	2797	102	1519	0	894	8633	1199	3126	5399	2559	0	70	8629	1507	0	0	85	0	0	0	1254	3175	0	0	50	0	0	0	53	91	104	131	13884	352
43069c9e7098f84f60c41ea9639cc46c	bASV49	d__Bacteria; p__Actinobacteriota; c__Actinobacteria; o__Streptomycetales; f__Streptomycetaceae; g__Streptomyces	GTAGTCCACGCCGTAAACGGTGGGAACTAGGTGTTGGCGACATTCCACGTCGTCGGTGCCGCAGCTAACGCATTAAGTTCCCCGCCTGGGGAGTACGGCCGCAAGGCTAAAACTCAAAGGAATTGACGGGGGCCCGCACAAGCAGCGGAGCATGTGGCTTAATTCGACGCAACGCGAAGAACCTTACCAAGGCTTGACATACACCGGAAACGGCCAGAGATGGTCGCCCCCTTGTGGTCGGTGTACAGGTGGTGCATGGCTGTCGTCAGCTCGTGTCGTGAGATGTTGGGTTAAGTCCCGCAACGA	1115	1178	698	911	0	665	553	1065	609	1300	404	342	1153	1760	497	0	1679	543	292	442	1254	2011	152	40	2935	1683	103	84	999	438	205	277	241	190	536	726	1189	202	544	1174	1197	378	992	786	1495	287
1a7e2286d5117548afcd579a340dc3c1	bASV50	d__Bacteria; p__Acidobacteriota; c__Acidobacteriae; o__Subgroup_2; f__Subgroup_2; g__Subgroup_2	GTAGTCCTAGCCCTAAACGATCAGGACTTGGGGTGCCACCCGTTCGGGTGTCGTCCCGGAGCTAACGCGTTAAGTCCTGCACCTGGGGAGTACGGTCGCAAGACTGAAACTCAAAGGAATTGACGGGGGCCCGCACAAGCGGTGGAACATGTGGTTCAATTCGACGCTACGCGAGGAACCTTACCTGGGCTCGAAATGCTAGTGACCAGCTGTAGAAATACGGCCTTCCCGCAAGGGACACTAGTATAGGCGCTGCATGGCTGTCGTCAGCTCGTGCCGTGAGGTGTTGGGTTAAGTCCCGCAACG	11	0	0	2504	3902	3804	347	3510	1402	192	642	0	4285	188	21	0	266	963	400	1836	342	473	8203	3099	618	699	639	436	1247	145	1185	179	155	0	20	1498	1626	801	0	0	0	168	127	252	33	271
0c372e3b45ab04d9fdfe6e677772797b	bASV51	d__Bacteria; p__Proteobacteria; c__Gammaproteobacteria; o__Pseudomonadales; f__Pseudomonadaceae; g__Pseudomonas; s__Pseudomonas_nitroreducens	GTAGTCCACGCCGTAAACGATGTCGACTAGCCGTTGGGATCCTTGAGATCTTAGTGGCGCAGCTAACGCGATAAGTCGACCGCCTGGGGAGTACGGCCGCAAGGTTAAAACTCAAATGAATTGACGGGGGCCCGCACAAGCGGTGGAGCATGTGGTTTAATTCGAAGCAACGCGAAGAACCTTACCTGGCCTTGACATGTCCGGAATCTTGCAGAGATGCGAGAGTGCCTTCGGGAATCGGAACACAGGTGCTGCATGGCTGTCGTCAGCTCGTGTCGTGAGATGTTGGGTTAAGTCCCGTAACGA	246	119	240	0	0	0	0	61	41	0	0	150	105	0	0	0	0	55	11	54	68	79	63	0	0	0	0	0	92	0	56	29	0	0	0	0	406	76	15	68	14	43	0	62	1025	0
73bff6135500b695fbe1a85534ee69d2	bASV52	d__Bacteria; p__Proteobacteria; c__Alphaproteobacteria; o__Rhizobiales; f__Rhizobiaceae; g__Ochrobactrum	GTAGTCCACGCCGTAAACGATGAATGTTAGCCGTTGGGGAGTTTACTCTTCGGTGGCGCAGCTAACGCATTAAACATTCCGCCTGGGGAGTACGGTCGCAAGATTAAAACTCAAAGGAATTGACGGGGGCCCGCACAAGCGGTGGAGCATGTGGTTTAATTCGAAGCAACGCGCAGAACCTTACCAGCCCTTGACATACCGGTCGCGGACACAGAGATGTGTCTTTCAGTTCGGCTGGACCGGATACAGGTGCTGCATGGCTGTCGTCAGCTCGTGTCGTGAGATGTTGGGTTAAGTCCCGCAACG	214	40	84	129	0	211	68	182	73	51	33	130	636	174	50	0	161	437	156	524	145	217	91	58	142	184	33	25	188	135	39	56	111	41	42	0	131	69	32	102	36	36	50	101	44	45
a94f60ca5ba976307ff06db36c610589	bASV53	d__Bacteria; p__Firmicutes; c__Bacilli; o__Lactobacillales; f__Streptococcaceae; g__Lactococcus; s__Lactococcus_lactis	GTAGTCCACGCCGTAAACGATGAGTGCTAGATGTAGGGAGCTATAAGTTCTCTGTATCGCAGCTAACGCAATAAGCACTCCGCCTGGGGAGTACGACCGCAAGGTTGAAACTCAAAGGAATTGACGGGGGCCCGCACAAGCGGTGGAGCATGTGGTTTAATTCGAAGCAACGCGAAGAACCTTACCAGGTCTTGACATACTCGTGCTATTCCTAGAGATAGGAAGTTCCTTCGGGACACGGGATACAGGTGGTGCATGGTTGTCGTCAGCTCGTGTCGTGAGATGTTGGGTTAAGTCCCGCAACGA	119	0	23	35	2324	68	31	25	324	34	0	131	7	0	19	0	39	11	73	14	0	99	0	108	34	0	105	30	41	0	0	0	0	0	0	0	28	0	0	0	0	0	0	0	176	0
bdc1e2ff0e43d960b41126c9f3225dc4	bASV54	d__Bacteria; p__Proteobacteria; c__Gammaproteobacteria; o__Pseudomonadales; f__Pseudomonadaceae; g__Pseudomonas	GTAGTCCACGCCGTAAACGATGTCAACTAGCCGTTGGGGACCTTGAGTCTTTAGTGGCGCAGCTAACGCATTAAGTTGACCGCCTGGGGAGTACGGCCGCAAGGTTAAAACTCAAATGAATTGACGGGGGCCCGCACAAGCGGTGGAGCATGTGGTTTAATTCGAAGCAACGCGAAGAACCTTACCAGGCCTTGACATCCAATGAACTTTCCAGAGATGGATTGGTGCCTTCGGGAACATTGAGACAGGTGCTGCATGGCTGTCGTCAGCTCGTGTCGTGAGATGTTGGGTTAAGTCCCGTAACGA	42	0	0	25	287	186	0	169	122	1254	140	0	180	85	1665	0	1614	290	0	239	384	427	0	0	493	303	0	0	90	0	0	0	209	97	117	0	390	0	0	0	0	0	0	0	229	170
1cbb942cf0b76018392433c055f32eb7	bASV55	d__Bacteria; p__Proteobacteria; c__Alphaproteobacteria; o__Rhizobiales; f__Xanthobacteraceae; g__Bradyrhizobium	GTAGTCCACGCCGTAAACGATGAATGCCAGCCGTTAGTGGGTTTACTCACTAGTGGCGCAGCTAACGCTTTAAGCATTCCGCCTGGGGAGTACGGTCGCAAGATTAAAACTCAAAGGAATTGACGGGGGCCCGCACAAGCGGTGGAGCATGTGGTTTAATTCGACGCAACGCGCAGAACCTTACCAGCCCTTGACATCCCGGTCGCGGACTCCAGAGATGGAGTTCTTCAGTTCGGCTGGACCGGAGACAGGTGCTGCATGGCTGTCGTCAGCTCGTGTCGTGAGATGTTGGGTTAAGTCCCGCAA	149	0	110	3984	2023	2919	1222	4160	2849	1380	722	136	3756	857	1046	0	3532	3333	1757	1278	2949	2022	1035	0	2067	1896	242	0	500	0	0	87	681	544	0	0	163	0	0	0	163	124	234	413	1368	1257
c391e3502f809137f39324ba930400bb	bASV56	d__Bacteria; p__Proteobacteria; c__Alphaproteobacteria; o__Rhizobiales; f__Rhizobiaceae; g__Allorhizobium-Neorhizobium-Pararhizobium-Rhizobium	GTAGTCCACGCCGTAAACGATGAATGTTAGCCGTCGGGCAGTATACTGTTCGGTGGCGCAGCTAACGCATTAAACATTCCGCCTGGGGAGTACGGTCGCAAGATTAAAACTCAAAGGAATTGACGGGGGCCCGCACAAGCGGTGGAGCATGTGGTTTAATTCGAAGCAACGCGCAGAACCTTACCAGCTCTTGACATTCGGGGTATGGGCAGTGGAGACATTGTCCTTCAGTTAGGCTGGCCCCAGAACAGGTGCTGCATGGCTGTCGTCAGCTCGTGTCGTGAGATGTTGGGTTAAGTCCCGCAA	1857	1028	745	88	361	416	0	585	77	53	193	388	64	194	440	0	0	239	0	117	79	178	165	55	0	164	72	57	90	0	0	85	979	0	56	130	0	0	0	0	0	16	67	351	151	38
8cf164734ed76fa99afa1ea83b9b3dd8	bASV57	d__Bacteria; p__Proteobacteria; c__Gammaproteobacteria; o__Burkholderiales; f__Comamonadaceae; g__Delftia	GTAGTCCACGCCCTAAACGATGTCAACTGGTTGTTGGGAATTAGTTTTCTCAGTAACGAAGCTAACGCGTGAAGTTGACCGCCTGGGGAGTACGGCCGCAAGGTTGAAACTCAAAGGAATTGACGGGGACCCGCACAAGCGGTGGATGATGTGGTTTAATTCGATGCAACGCGAAAAACCTTACCCACCTTTGACATGGCAGGAAGTTTCCAGAGATGGATTCGTGCTCGAAAGAGAACCTGCACACAGGTGCTGCATGGCTGTCGTCAGCTCGTGTCGTGAGATGTTGGGTTAAGTCCCGCAACG	19	29	0	31	237	30	0	43	37	0	0	0	83	35	0	0	0	44	0	63	21	39	26	42	52	0	0	17	33	0	13	0	0	0	0	0	16	0	0	0	0	0	0	0	0	0
4e0abf0955a610c0b526bfe83f48878e	bASV58	d__Bacteria; p__Firmicutes; c__Bacilli; o__Bacillales; f__Bacillaceae; g__Bacillus	GTAGTCCACGCCGTAAACGATGAGTGCTAAGTGTTAGAGGGTTTCCGCCCTTTAGTGCTGCAGCTAACGCATTAAGCACTCCGCCTGGGGAGTACGGCCGCAAGGCTGAAACTCAAAGGAATTGACGGGGGCCCGCACAAGCGGTGGAGCATGTGGTTTAATTCGAAGCAACGCGAAGAACCTTACCAGGTCTTGACATCCTCTGACACTCCTAGAGATAGGACTTTCCCCTTCGGGGGACAGAGTGACAGGTGGTGCATGGTTGTCGTCAGCTCGTGTCGTGAGATGTTGGGTTAAGTCCCGCAA	1295	0	2756	295	0	928	255	321	280	160	0	525	1798	0	3659	0	0	1231	227	150	563	1693	110	193	956	0	0	0	514	0	0	0	165	510	0	0	149	0	84	0	123	365	264	283	24874	417
314feed217e3bea480de10fb7af4e5b5	bASV59	d__Bacteria; p__Actinobacteriota; c__Actinobacteria; o__Frankiales; f__Acidothermaceae; g__Acidothermus	GTAGTCCACGCCGTAAACGTTGGGCGCTAGGTGTGGGATCCTTCCACGGATTCCGTGCCGCAGCTAACGCATTAAGCGCCCCGCCTGGGGAGTACGGCCGCAAGGCTAAAACTCAAAGGAATTGACGGGGGCCCGCACAAGCGGCGGAGCATGTTGCTTAATTCGACGCAACGCGAAGAACCTTACCAAGGTTTGACATGCAGGGAAAAGCCGTAGAGATACGGTGTCCGTAAGGGTCCTGCACAGGTGGTGCATGGCTGTCGTCAGCTCGTGTCGTGAGATGTTGGGTTAAGTCCCGCAACGAGC	0	0	0	813	4060	1013	691	1000	327	133	180	0	770	281	0	0	1121	210	685	291	313	1191	1589	614	236	0	0	0	116	0	218	0	0	60	0	690	314	0	0	0	0	58	64	77	0	94
3ca2a56e41cffc8e324d0e58150e4f2e	bASV60	d__Bacteria; p__Proteobacteria; c__Alphaproteobacteria; o__Rhizobiales; f__Xanthobacteraceae; g__uncultured; s__uncultured_Caulobacterales	GTAGTCCACGCCGTAAACGATGGATGCTAGCCGTTGGCAGGCTTGCCTGTCAGTGGCGCAGCTAACGCATTAAGCATCCCGCCTGGGGAGTACGGTCGCAAGATTAAAACTCAAAGGAATTGACGGGGGCCCGCACAAGCGGTGGAGCATGTGGTTCAATTCGAAGCAACGCGCAGAACCTTACCAACCTTTGACATCCCGATCGCGGGCACCAGAGATGGAGCCTTTCAGTTCGGCTGGATCGGAGACAGGTGCTGCATGGCTGTCGTCAGCTCGTGTCGTGAGATGTTGGGTTAAGTCCCGCAA	1187	224	740	416	1246	518	193	706	237	1066	525	614	1258	600	920	0	1014	4387	279	724	745	731	1286	90	641	1105	201	163	1757	3453	1403	3492	760	1186	981	1392	112	28	1619	3306	3048	677	1799	2479	1090	661
b8af9947ade0d665a01f39096abef384	bASV61	d__Bacteria; p__Actinobacteriota; c__Actinobacteria; o__Propionibacteriales; f__Nocardioidaceae; g__Nocardioides	GTAGTCCACACCGTAAACGTTGGGCGCTAGGTGTGGGGTCCATTCCACGGATTCCGTGCCGCAGCTAACGCATTAAGCGCCCCGCCTGGGGAGTACGGCCGCAAGGCTAAAACTCAAAGGAATTGACGGGGGCCCGCACAAGCGGCGGAGCATGCGGATTAATTCGATGCAACGCGAAGAACCTTACCTGGGTTTGACATACACCCTGCCGCTCCAGAGATGGGGCTTCTTTTGGGGGTGTACAGGTGGTGCATGGCTGTCGTCAGCTCGTGTCGTGAGATGTTGGGTTAAGTCCCGCAACGAGCG	3755	873	3332	335	651	208	181	1463	356	857	314	1146	192	874	731	0	0	374	151	296	382	467	586	190	382	1119	240	375	845	1297	182	280	105	0	461	1129	321	36	697	2067	1878	631	707	1360	196	609
dcc241e9128c1edfd515c1ec8394dea3	bASV62	d__Bacteria; p__Proteobacteria; c__Alphaproteobacteria; o__Rhizobiales; f__Xanthobacteraceae; g__uncultured	GTAGTCCACGCCGTAAACGATGGATGCTAGCCGTTGTCGGGTTTACTCGTCAGTGGCGCAGCTAACGCATTAAGCATCCCGCCTGGGGAGTACGGTCGCAAGATTAAAACTCAAAGGAATTGACGGGGGCCCGCACAAGCGGTGGAGCATGTGGTTCAATTCGAAGCAACGCGAAGAACCTTACCAGCCTTTGACATCCCGGTCGCGGGCACCAGAGATGGAGCCCTTCAGTTCGGCTGGACCGGAGACAGGTGCTGCATGGCTGTCGTCAGCTCGTGTCGTGAGATGTTGGGTTAAGTCCCGCAA	0	0	0	0	2432	316	0	0	0	0	0	0	436	0	0	0	0	0	0	0	0	0	1338	438	0	0	0	0	67	0	136	0	0	0	0	601	133	125	0	0	0	0	15	0	0	0
0e26ee36d67905bc9f6783460b97b644	bASV63	d__Bacteria; p__Proteobacteria; c__Alphaproteobacteria; o__Rhizobiales; f__Xanthobacteraceae; g__uncultured	GTAGTCCACGCCGTAAACGATGGATGCTAGCCGTTGTCGGGTTTACCCGTCAGTGGCGCAGCTAACGCATTAAGCATCCCGCCTGGGGAGTACGGTCGCAAGATTAAAACTCAAAGGAATTGACGGGGGCCCGCACAAGCGGTGGAGCATGTGGTTCAATTCGAAGCAACGCGAAGAACCTTACCAGCCTTTGACATCCCGGTCGCGGGCACCAGAGATGGAGCCCTTCAGTTCGGCTGGACCGGAGACAGGTGCTGCATGGCTGTCGTCAGCTCGTGTCGTGAGATGTTGGGTTAAGTCCCGCAA	0	0	0	0	0	919	0	0	0	0	0	0	120	0	0	0	0	0	0	0	0	0	265	200	0	0	0	0	0	0	0	0	0	0	0	0	87	0	0	0	0	0	0	0	0	0
27d178ff8451e9799070e6473ae35a35	bASV64	d__Bacteria; p__Proteobacteria; c__Alphaproteobacteria; o__Rhizobiales; f__Xanthobacteraceae	GTAGTCCACGCCGTAAACGATGAATGCCAGCCGTTAGTGGGTTTACTCACTAGTGGCGCAGCTAACGCTTTAAGCATTCCGCCTGGGGAGTACGGTCGCAAGATTAAAACTCAAAGGAATTGACGGGGGCCCGCACAAGCGGTGGAGCATGTGGTTTAATTCGACGCAACGCGCAGAACCTTACCAGCCCTTGACATGTCCGGGACCGGTCGCAGAGACGTGACCTTCTCTTCGGAGCCCGGAACACAGGTGCTGCATGGCTGTCGTCAGCTCGTGTCGTGAGATGTTGGGTTAAGTCCCGCAACG	0	0	0	551	2123	794	280	696	194	50	399	0	427	265	0	0	1590	197	269	534	424	984	1529	584	369	0	0	0	59	0	202	0	0	0	0	660	457	384	0	0	0	0	0	0	0	0
a47c89155b5ebc9bf513533eff013bcc	bASV65	d__Bacteria; p__Proteobacteria; c__Alphaproteobacteria; o__Rhizobiales; f__Xanthobacteraceae; g__uncultured	GTAGTCCACGCCGTAAACGATGGATGCTAGCCGTTGGTGGGTTTACCCTTCAGTGGCGCAGCTAACGCATTAAGCATCCCGCCTGGGGAGTACGGTCGCAAGATTAAAACTCAAAGGAATTGACGGGGGCCCGCACAAGCGGTGGAGCATGTGGTTCAATTCGAAGCAACGCGCAGAACCTTACCAGCCTTTGACATCCCGGTCGCGAGCACCAGAGATGGAGCTCTTCAGTTCGGCTGGACCGGAGACAGGTGCTGCATGGCTGTCGTCAGCTCGTGTCGTGAGATGTTGGGTTAAGTCCCGCAA	225	0	284	4437	1441	2461	616	6757	2574	1424	1052	118	2140	586	870	0	2357	8883	679	1473	3599	2017	909	363	3493	3882	80	0	391	852	224	596	1760	2258	144	0	209	90	277	511	721	299	500	650	1939	853
1187bf22225ae2a49f565860ff339872	bASV66	d__Bacteria; p__Proteobacteria; c__Alphaproteobacteria; o__Rhizobiales; f__Rhizobiaceae; g__Allorhizobium-Neorhizobium-Pararhizobium-Rhizobium	GTAGTCCACGCCGTAAACGATGAATGTTAGCCGTCGGGCAGTATACTGTTCGGTGGCGCAGCTAACGCATTAAACATTCCGCCTGGGGAGTACGGTCGCAAGATTAAAACTCAAAGGAATTGACGGGGGCCCGCACAAGCGGTGGAGCATGTGGTTTAATTCGAAGCAACGCGCAGAACCTTACCAGCCCTTGACATCCTGTGTTACCCAGAGAGATTTGGGGTCCACTTCGGTGGCGCAGAGACAGGTGCTGCATGGCTGTCGTCAGCTCGTGTCGTGAGATGTTGGGTTAAGTCCCGCAACGAG	241	975	661	278	0	219	287	634	245	289	50	296	293	64	522	0	243	1381	698	198	125	332	265	66	324	0	36	32	128	0	58	0	84	77	690	0	0	0	53	152	91	51	36	44	100	41
64fbf64c1eba8ce7b66ba760a2515a3e	bASV67	d__Bacteria; p__Proteobacteria; c__Gammaproteobacteria; o__Enterobacterales	GTAGTCCACGCCGTAAACGATGTCGACTTGGAGGTTGTTCCCTTGAGGAGTGGCTTCCGGAGCTAACGCGTTAAGTCGACCGCCTGGGGAGTACGGCCGCAAGGTTAAAACTCAAATGAATTGACGGGGGCCCGCACAAGCGGTGGAGCATGTGGTTTAATTCGATGCAACGCGAAGAACCTTACCTACTCTTGACATCCACGGAACTTTTCAGAGATGAATTGGTGCCTTCGGGAACCGTGAGACAGGTGCTGCATGGCTGTCGTCAGCTCGTGTTGTGAAATGTTGGGTTAAGTCCCGCAACGA	2516	411	11692	0	0	0	0	44	0	26	0	1671	24	0	19	0	0	40	0	671	104	77	886	47	83	0	44	86	287	674	17	122	0	0	45	0	0	0	0	0	0	0	0	0	87	0
832c75868d05150a05a6ca5f39d22bcf	bASV68	d__Bacteria; p__Proteobacteria; c__Gammaproteobacteria; o__Pseudomonadales; f__Pseudomonadaceae; g__Pseudomonas	GTAGTCCACGCCGTAAACGATGTCGACTAGCCGTTGGGATCCTTGAGATCTTAGTGGCGCAGCTAACGCGATAAGTCGACCGCCTGGGGAGTACGGCCGCAAGGTTAAAACTCAAATGAATTGACGGGGGCCCGCACAAGCGGTGGAGCATGTGGTTTAATTCGAAGCAACGCGAAGAACCTTACCTGGCCTTGACATGCTGAGAACTTTCCAGAGATGGATTGGTGCCTTCGGGAACTCAGACACAGGTGCTGCATGGCTGTCGTCAGCTCGTGTCGTGAGATGTTGGGTTAAGTCCCGTAACGA	2566	846	6925	58	0	137	0	0	49	298	89	2891	0	102	1634	83	0	566	0	80	630	134	0	42	1084	0	46	0	40	0	187	111	199	143	88	0	0	0	27	156	49	0	110	69	8227	288
e8a3f0e68e05d5ec4932b8d1b012d659	bASV69	d__Bacteria; p__Proteobacteria; c__Gammaproteobacteria; o__Burkholderiales; f__Comamonadaceae	GTAGTCCACGCCCTAAACGATGTCAACTGGTTGTTGGGTCTTCACTGACTCAGTAACGAAGCTAACGCGTGAAGTTGACCGCCTGGGGAGTACGGCCGCAAGGTTGAAACTCAAAGGAATTGACGGGGACCCGCACAAGCGGTGGATGATGTGGTTTAATTCGATGCAACGCGAAAAACCTTACCCACCTTTGACATGTACGGAATCCTTTAGAGATAGAGGAGTGCTCGAAAGAGAGCCGTAACACAGGTGCTGCATGGCTGTCGTCAGCTCGTGTCGTGAGATGTTGGGTTAAGTCCCGCAACG	130	262	115	297	0	206	80	242	87	161	0	119	495	185	116	0	0	244	133	139	161	242	98	153	358	0	36	0	140	182	56	76	122	64	81	141	80	27	0	79	94	0	0	18	0	0
4b013e029e326e07fb0d2b71f920824c	bASV70	d__Bacteria; p__Proteobacteria; c__Alphaproteobacteria; o__Rhizobiales; f__Xanthobacteraceae; g__uncultured	GTAGTCCACGCCGTAAACGATGGAGGCTAGCCGTTGGCGAGCATGCTCGTCAGTGGCGCAGCTAACGCATTAAGCCTCCCGCCTGGGGAGTACGGTCGCAAGATTAAAACTCAAAGGAATTGACGGGGGCCCGCACAAGCGGTGGAGCATGTGGTTCAATTCGAAGCAACGCGAAGAACCTTACCAGCCCTTGACATCCCGGTCGCGGGAACGAGAGATCGATCCCTTCAGTTCGGCTGGACCGGAGACAGGTGCTGCATGGCTGTCGTCAGCTCGTGTCGTGAGATGTTGGGTTAAGTCCCGCAA	0	0	0	0	1974	457	331	0	0	0	0	0	1101	54	0	0	0	146	340	0	0	261	567	308	0	0	0	0	0	0	0	0	0	0	0	0	61	20	0	0	0	0	0	0	0	57
09c37e859ef312ed056e8862edde110b	bASV71	d__Bacteria; p__Proteobacteria; c__Gammaproteobacteria; o__Burkholderiales; f__Comamonadaceae	GTAGTCCACGCCCTAAACGATGTCAACTGGTTGTTGGACGGCTTGCTGTTCAGTAACGAAGCTAACGCGTGAAGTTGACCGCCTGGGGAGTACGGCCGCAAGGTTGAAACTCAAAGGAATTGACGGGGACCCGCACAAGCGGTGGATGATGTGGTTTAATTCGATGCAACGCGAAAAACCTTACCTACCCTTGACATGCCAGGAACTTGCCAGAGATGGCTTGGTGCTCGAAAGAGAGCCTGGACACAGGTGCTGCATGGCCGTCGTCAGCTCGTGTCGTGAGATGTTGGGTTAAGTCCCGCAACG	199	125	193	271	454	214	120	362	220	97	83	114	196	239	231	0	362	141	73	137	147	126	440	152	149	0	0	0	134	1058	131	307	71	0	363	0	812	214	255	381	339	69	181	178	485	103
b2655992581caf875b32e8cbb0cb3516	bASV72	d__Bacteria; p__Actinobacteriota; c__Actinobacteria; o__Corynebacteriales; f__Mycobacteriaceae; g__Mycobacterium	GTAGTCCACGCCGTAAACGGTGGGTACTAGGTGTGGGTTTCCTTCCTTGGGATCCGTGCCGTAGCTAACGCATTAAGTACCCCGCCTGGGGAGTACGGCCGCAAGGCTAAAACTCAAAGGAATTGACGGGGGCCCGCACAAGCGGCGGAGCATGTGGATTAATTCGATGCAACGCGAAGAACCTTACCTGGGTTTGACATGCACAGGACGTGCCTAGAGATAGGTATTCCCTTGTGGCCTGTGTGCAGGTGGTGCATGGCTGTCGTCAGCTCGTGTCGTGAGATGTTGGGTTAAGTCCCGCAACGA	487	91	619	943	1391	1935	429	1660	587	1162	889	153	1453	1105	516	0	0	4108	646	510	1359	1533	785	161	928	1897	365	304	1297	0	114	119	710	1041	234	761	140	0	77	179	180	467	362	685	412	605
9580b10cc6d3118edcdf45764c1913d7	bASV73	d__Bacteria; p__Proteobacteria; c__Alphaproteobacteria; o__Rhizobiales; f__Methyloligellaceae	GTAGTCCACGCCGTAAACTATGGGTGCTAGCCGTCGGTCGGCATGCCGGTCGGTGGCGCAGCAAACGCATTAAGCACCCCGCCTGGGGAGTACGGTCGCAAGATTAAAACTCAAAGGAATTGACGGGGGCCCGCACAAGCGGTGGAGCATGTGGTTTAATTCGAGGCAACGCGAAGAACCTTACCAGCCCTTGACTTCCCGATCGGGGCTCCGGAGACGGAGCTCTTCAATTGGTCGGTGACAGGTGCTGCATGGCTGTCGTCAGCTCGTGTCGTGAGATGTTGGGTTAAGTCCCGCAACGAGCGC	691	149	589	524	468	1420	330	873	337	380	581	521	2298	793	210	0	0	1335	428	239	931	548	95	0	639	699	0	0	507	0	90	163	251	319	130	0	85	27	232	497	831	185	372	301	512	751
6d2af41a2d78137b75ce2e0772f81ed6	bASV74	d__Bacteria; p__Proteobacteria; c__Gammaproteobacteria; o__Burkholderiales; f__Comamonadaceae	GTAGTCCACGCCCTAAACGATGTCAACTGGTTGTTGGGTCTTCACTGACTCAGTAACGAAGCTAACGCGTGAAGTTGACCGCCTGGGGAGTACGGCCGCAAGGTTGAAACTCAAAGGAATTGACGGGGACCCGCACAAGCGGTGGATGATGTGGTTTAATTCGATGCAACGCGAAAAACCTTACCCACCTTTGACATGTACGGAATTTGCCAGAGATGGCTTAGTGCTCGAAAGAGAGCCGTAACACAGGTGCTGCATGGCTGTCGTCAGCTCGTGTCGTGAGATGTTGGGTTAAGTCCCGCAACG	185	9943	177	153	0	153	128	382	84	3697	0	74	119	90	363	0	0	527	0	133	269	383	380	176	456	0	0	0	0	0	0	0	262	124	0	0	1013	77	0	0	0	0	0	0	152	33
a9fa89d8641a7043b5c93f07cba5ffa3	bASV75	d__Bacteria; p__Actinobacteriota; c__Actinobacteria; o__Corynebacteriales; f__Nocardiaceae; g__Rhodococcus	GTAGTCCACGCCGTAAACGGTGGGCGCTAGGTGTGGGTTCCTTCCACGGAATCCGTGCCGTAGCTAACGCATTAAGCGCCCCGCCTGGGGAGTACGGCCGCAAGGCTAAAACTCAAAGGAATTGACGGGGGCCCGCACAAGCGGCGGAGCATGTGGATTAATTCGATGCAACGCGAAGAACCTTACCTGGGTTTGACATATACCGGAAAGCTGCAGAGATGTGGCCCCCCTTGTGGTCGGTATACAGGTGGTGCATGGCTGTCGTCAGCTCGTGTCGTGAGATGTTGGGTTAAGTCCCGCAACGAG	55	0	0	0	0	33	0	48	20	0	0	0	55	57	0	0	0	47	0	0	20	58	0	0	0	0	0	0	73	0	0	0	88	0	0	0	35	0	0	0	0	0	0	0	31	0
57ff974872e6b2b6cd17ee332d21cc7a	bASV76	d__Bacteria; p__Actinobacteriota; c__Actinobacteria; o__Streptomycetales; f__Streptomycetaceae; g__Streptomyces	GTAGTCCACGCCGTAAACGGTGGGAACTAGGTGTTGGCGACATTCCACGTCGTCGGTGCCGCAGCTAACGCATTAAGTTCCCCGCCTGGGGAGTACGGCCGCAAGGCTAAAACTCAAAGGAATTGACGGGGGCCCGCACAAGCAGCGGAGCATGTGGCTTAATTCGACGCAACGCGAAGAACCTTACCAAGGCTTGACATACACCGGAAAGCATTAGAGATAGTGCCCCCCTTGTGGTCGGTGTACAGGTGGTGCATGGCTGTCGTCAGCTCGTGTCGTGAGATGTTGGGTTAAGTCCCGCAACGA	859	194	312	441	822	473	170	696	163	3761	171	417	630	246	0	0	400	329	118	165	978	1642	820	198	854	278	276	259	3315	0	286	190	143	196	367	1331	4293	431	515	914	645	436	851	758	771	136
6798b1bfa4e499f4d4aa1ca71fa87ce4	bASV77	d__Bacteria; p__Proteobacteria; c__Gammaproteobacteria; o__Steroidobacterales; f__Steroidobacteraceae; g__Steroidobacter	GTAGTCCACGCCATAAACGATGAGAACTGGATGTCGGGAGGGTCTGCCTCTCGGTGTCGTAGCTAACGCGTTAAGTTCTCCGCCTGGGGAGTACGGCCGCAAGGTTGAAACTCAAAGGAATTGACGGGGACCCGCACAAGCGGTGGAGCATGTGGTTTAATTCGATGCAACGCGAAGAACCTTACCTGGTCTTGACATCCCAGGAACCCTGCAGAGATGTGGGGGTGCCTTCGGGAACCTGGAGACAGGTGCTGCATGGCTGTCGTCAGCTCGTGTCGTGAGATGTTGGGTTAAGTCCCGCAACGA	762	351	583	625	767	380	93	994	433	447	321	312	226	151	1094	0	0	1200	106	235	489	454	415	61	479	0	183	312	1596	1348	653	1159	304	413	448	1370	48	0	324	1353	1063	356	724	1308	2638	199
17a1113cd00e994065876153d596f87a	bASV78	d__Bacteria; p__Proteobacteria; c__Alphaproteobacteria; o__Sphingomonadales; f__Sphingomonadaceae; g__Sphingomonas	GTAGTCCACGCCGTAAACGATGATGACTAGCTGTCGGGGCGCTTAGCGTTCCGGTGGCGCAGCTAACGCGTTAAGTCATCCGCCTGGGGAGTACGGCCGCAAGGTTAAAACTCAAAGAAATTGACGGGGGCCTGCACAAGCGGTGGAGCATGTGGTTTAATTCGAAGCAACGCGCAGAACCTTACCAGCGTTTGACATGCCAGGACGGTTTCCAGAGATGGATTCCTTCCCTTACGGGACCTGGACACAGGTGCTGCATGGCTGTCGTCAGCTCGTGTCGTGAGATGTTGGGTTAAGTCCCGCAAC	439	95	272	1067	1075	908	151	1709	764	208	226	218	2101	357	109	0	346	2841	257	304	685	364	2071	550	611	600	585	400	1136	771	357	279	537	567	329	3650	2569	1273	764	1204	928	1607	1600	2325	92	131
1889ea34da1dbd9a16b8928a18014db8	bASV79	d__Bacteria; p__Proteobacteria; c__Alphaproteobacteria; o__Rhizobiales; f__Rhizobiales_Incertae_Sedis; g__Nordella; s__uncultured_bacterium	GTAGTCCACGCCGTAAACTATGGATGCTAGCCGTCAGCGAGCTTGCTCGTTGGTGGCGCAGCTAACGCATTAAGCATCCCGCCTGGGGAGTACGGTCGCAAGATTAAAACTCAAAGGAATTGACGGGGGCCCGCACAAGCGGTGGAGCATGTGGTTTAATTCGAAGCAACGCGCAGAACCTTACCAACCCTTGACATGTCGGTCGCGGACACCAGAGATGGAGTCCTTCAGTTCGGCTGGACCGAACACAGGTGCTGCATGGCTGTCGTCAGCTCGTGTCGTGAGATGTTGGGTTAAGTCCCGCAA	3420	614	1686	313	574	693	40	395	223	675	419	1133	586	1079	930	0	337	1007	52	237	655	438	140	42	585	556	127	179	1073	1053	415	909	328	255	801	297	69	0	301	867	464	196	369	488	1568	542
e01323ac6aed9c3c34eec3e69cc3b17a	bASV80	d__Bacteria; p__Nitrospirota; c__Nitrospiria; o__Nitrospirales; f__Nitrospiraceae; g__Nitrospira; s__uncultured_soil	GTAGTCCACGCCTTAAACGATGGATACTAAGTGTCGGCGGGTTACCGCCGGTGCCGCAGCTAACGCAGTAAGTATCCCGCCTGGGAAGTACGGCCGCAAGGTTGAAACTCAAAGGAATTGACGGGGGCCCGCACAAGCGGTGGAGCATGTGGTTTAATTCGACGCAACGCGAAGAACCTTACCTAGGCTGGACATGCACGTAGTAGAAGGATGAAAGTCTAACGAGGTAGCAATACCAGCGTGCTCAGGTGCTGCATGGCTGTCGTCAGCTCGTGCCGTGAGGTGTTGGGTTAAGTCCCGCAACGA	2116	369	874	4155	0	1270	814	7134	2992	1344	961	618	3999	380	937	0	1523	9223	1104	735	1986	2287	558	39	2115	1423	53	136	639	413	251	360	1543	2487	290	326	39	0	64	195	148	144	223	427	184	671
1730343f99a85783e07c924afdd94371	bASV81	d__Bacteria; p__Proteobacteria; c__Alphaproteobacteria; o__Rhizobiales; f__Xanthobacteraceae; g__Bradyrhizobium	GTAGTCCACGCCGTAAACGATGAATGCCAGCCGTTAGTGGGTTTACTCACTAGTGGCGCAGCTAACGCTTTAAGCATTCCGCCTGGGGAGTACGGTCGCAAGATTAAAACTCAAAGGAATTGACGGGGGCCCGCACAAGCGGTGGAGCATGTGGTTTAATTCGACGCAACGCGCAGAACCTTACCAGCCCTTGACATGTCCAGGACCGGTCGCAGAGATGTGACCCTCTCTTCGGAGCCTGGAACACAGGTGCTGCATGGCTGTCGTCAGCTCGTGTCGTGAGATGTTGGGTTAAGTCCCGCAACG	180	83	99	175	1980	215	0	323	139	846	0	127	601	0	231	0	0	319	0	85	258	311	1194	1090	231	0	227	191	1710	0	291	171	0	0	666	910	6575	4385	87	179	91	1098	1531	1600	104	288
c71e369d205e556f1f1b43a9458a1ba5	bASV82	d__Bacteria; p__Proteobacteria; c__Alphaproteobacteria; o__Rhizobiales; f__Methyloligellaceae; g__Methyloligellaceae; s__uncultured_bacterium	GTAGTCCACGCCGTAAACTATGGGTGCTAGCCGTCGGTCGGCATGCCGGTCGGTGGCGCAGCCAACGCATTAAGCACCCCGCCTGGGGAGTACGGTCGCAAGATTAAAACTCAAAGGAATTGACGGGGGCCCGCACAAGCGGTGGAGCATGTGGTTTAATTCGAGGCAACGCGAAGAACCTTACCAGCCCTTGACTTCCCGGTCGGGGCTCCGGAGACGGAGCTCTTCAATTGGCCGGTGACAGGTGCTGCATGGCTGTCGTCAGCTCGTGTCGTGAGATGTTGGGTTAAGTCCCGCAACGAGCGC	564	205	673	2368	843	2122	204	4085	1286	472	1120	300	1731	834	531	0	0	4711	210	978	3053	531	54	0	2420	2914	0	0	124	887	338	977	824	1249	338	0	0	0	102	344	412	64	104	68	467	765
dee39a9e764dc12a295e59f6395d2371	bASV83	d__Bacteria; p__Firmicutes; c__Bacilli; o__Bacillales; f__Bacillaceae; g__Bacillus	GTAGTCCACGCCGTAAACGATGAGTGCTAAGTGTTAGAGGGTTTCCGCCCTTTAGTGCTGCAGCTAACGCATTAAGCACTCCGCCTGGGGAGTACGGCCGCAAGGCTGAAACTCAAAGGAATTGACGGGGGCCCGCACAAGCGGTGGAGCATGTGGTTTAATTCGAAGCAACGCGAAGAACCTTACCAGGTCTTGACATCCTCTGACAACCCTAGAGATAGGGCTTTCCCCTTCGGGGGACAGAGTGACAGGTGGTGCATGGTTGTCGTCAGCTCGTGTCGTGAGATGTTGGGTTAAGTCCCGCAA	1694	61	566	4309	0	225	314	2964	4693	1164	666	354	588	0	551	0	944	840	498	1703	3767	838	0	0	5988	1349	0	0	103	0	0	0	242	347	193	0	124	0	0	0	39	63	76	95	15599	169
0dff7a29891c69c8a7d3702bca915f18	bASV84	d__Bacteria; p__Proteobacteria; c__Gammaproteobacteria; o__Enterobacterales	GTAGTCCACGCTGTAAACGATGTCGATTTGGAGGTTGTGCCCTTGAGGCGTGGCTTCCGGAGCTAACGCGTTAAATCGACCGCCTGGGGAGTACGGCCGCAAGGTTAAAACTCAAATGAATTGACGGGGGCCCGCACAAGCGGTGGAGCATGTGGTTTAATTCGATGCAACGCGAAGAACCTTACCTACTCTTGACATCCAGAGAACTTAGCAGAGATGCTTTGGTGCCTTCGGGAACTCTGAGACAGGTGCTGCATGGCTGTCGTCAGCTCGTGTTGTGAAATGTTGGGTTAAGTCCCGCAACGA	201	461	4746	0	0	0	61	0	0	0	0	916	46	0	37	0	0	0	0	0	54	69	0	0	0	0	0	0	0	0	29	0	0	0	0	0	60	0	0	0	0	0	0	0	53	0
3658a7e08007f6da6004dff989f69058	bASV85	d__Bacteria; p__Proteobacteria; c__Gammaproteobacteria; o__Burkholderiales; f__Comamonadaceae	GTAGTCCACGCCCTAAACGATGTCAACTGGTTGTTGGGTCTTCACTGACTCAGTAACGAAGCTAACGCGTGAAGTTGACCGCCTGGGGAGTACGGCCGCAAGGTTGAAACTCAAAGGAATTGACGGGGACCCGCACAAGCGGTGGATGATGTGGTTTAATTCGATGCAACGCGAAAAACCTTACCCACCTTTGACATGTACGGAATTTGCCAGAGATGGCTTAGTGCTCGAAAGAGAACCGTAACACAGGTGCTGCATGGCTGTCGTCAGCTCGTGTCGTGAGATGTTGGGTTAAGTCCCGCAACG	261	1249	120	328	1310	440	0	552	210	544	473	82	224	499	975	96	1073	835	160	1005	645	947	1995	256	1031	1123	332	259	1140	505	253	231	281	248	503	411	1110	100	60	0	127	71	54	135	544	151
3dd4c9a456e1b59d5797b08bff0549ce	bASV86	d__Bacteria; p__Proteobacteria; c__Gammaproteobacteria; o__Enterobacterales	GTAGTCCACGCCGTAAACGATGTCGACTTGGAGGTTGTGCCCTTGAGGCGTGGCTTCCGGAGCTAACGCGTTAAGTCGACCGCCTGGGGAGTACGGCCGCAAGGTTAAAACTCAAATGAATTGACGGGGGCCCGCACAAGCGGTGGAGCATGTGGTTTAATTCGATGCAACGCGAAGAACCTTACCTGGCCTTGACATCCAGAGAACTTAGCAGAGATGCTTTGGTGCCTTCGGGAACTCTGAGACAGGTGCTGCATGGCTGTCGTCAGCTCGTGTTGTGAAATGTTGGGTTAAGTCCCGCAACGA	163	0	17938	0	0	0	0	0	0	0	0	134	0	0	0	0	0	0	0	0	0	0	710	75	0	0	0	0	105	0	0	0	0	0	0	0	0	0	0	0	0	0	0	0	0	0
ac27ee63cd1c4af74b79080a8f871c4e	bASV87	d__Bacteria; p__Proteobacteria; c__Alphaproteobacteria; o__Rhizobiales; f__Rhizobiaceae; g__Allorhizobium-Neorhizobium-Pararhizobium-Rhizobium	GTAGTCCACGCCGTAAACGATGAATGTTAGCCGTCGGGCAGTATACTGTTCGGTGGCGCAGCTAACGCATTAAACATTCCGCCTGGGGAGTACGGTCGCAAGATTAAAACTCAAAGGAATTGACGGGGGCCCGCACAAGCGGTGGAGCATGTGGTTTAATTCGAAGCAACGCGCAGAACCTTACCAGCTCTTGACATTCGGGGTTTGGGCAGTGGAGACATTGTCCTTCAGTTAGGCTGGCCCCAGAACAGGTGCTGCATGGCTGTCGTCAGCTCGTGTCGTGAGATGTTGGGTTAAGTCCCGCAA	157	181	174	98	0	121	94	201	430	0	0	0	107	0	589	0	0	85	62	0	0	0	56	68	115	0	0	0	105	0	43	0	184	0	0	0	0	0	0	0	0	0	149	0	0	0
5546c7b5fac1d4434cd66b0bd3b556b2	bASV88	d__Bacteria; p__Acidobacteriota; c__Acidobacteriae; o__Subgroup_2; f__Subgroup_2; g__Subgroup_2; s__uncultured_Acidobacteria	GTAGTCCTAGCCCTAAACGATCAGGACTTGGGGTGCCACCCGTTCGGGTGTCGTCCCGGAGCTAACGCGTTAAGTCCTGCACCTGGGGAGTACGGTCGCAAGACTGAAACTCAAAGGAATTGACGGGGGCCCGCACAAGCGGTGGAACATGTGGTTCAATTCGACGCTACGCGAGGAACCTTACCTGGGCTCGAAATGCTTCTGACCAGCTGTAGAAATACGGCCTTCCCGCAAGGGACAGGAGTATAGGCGCTGCATGGCTGTCGTCAGCTCGTGCCGTGAGGTGTTGGGTTAAGTCCCGCAACG	0	0	0	965	0	569	315	759	562	0	92	0	1297	120	0	0	0	465	346	174	181	181	202	288	300	0	0	0	0	0	348	0	42	45	0	0	489	280	0	0	0	0	0	0	0	99
7f46fa849f9743c244435e37af5eb4fb	bASV89	d__Bacteria; p__Proteobacteria; c__Gammaproteobacteria; o__Burkholderiales; f__Burkholderiaceae; g__Burkholderia-Caballeronia-Paraburkholderia	GTAGTCCACGCCCTAAACGATGTCAACTAGTTGTCGGGTCTTCATTGACTTGGTAACGTAGCTAACGCGTGAAGTTGACCGCCTGGGGAGTACGGTCGCAAGATTAAAACTCAAAGGAATTGACGGGGACCCGCACAAGCGGTGGATGATGTGGATTAATTCGATGCAACGCGAAAAACCTTACCTACCCTTGACATGTACGGAATCCTGCTGAGAGGTGGGAGTGCCCGAAAGGGAGCCGTAACACAGGTGCTGCATGGCTGTCGTCAGCTCGTGTCGTGAGATGTTGGGTTAAGTCCCGCAACG	0	0	0	0	1277	243	99	0	42	0	0	0	87	0	0	0	0	0	0	0	0	0	2094	877	0	0	0	0	96	0	172	0	0	0	0	576	1760	397	0	0	0	52	24	52	0	0
d1843f6267132fdc3f7d3cd007f9ede6	bASV90	d__Bacteria; p__Firmicutes; c__Bacilli; o__Bacillales; f__Bacillaceae; g__Bacillus	GTAGTCCACGCCGTAAACGATGAGTGCTAAGTGTTAGAGGGTTTCCGCCCTTTAGTGCTGCAGCTAACGCATTAAGCACTCCGCCTGGGGAGTACGGCCGCAAGGCTGAAACTCAAAGGAATTGACGGGGGCCCGCACAAGCGGTGGAGCATGTGGTTTAATTCGAAGCAACGCGAAGAACCTTACCAGGTCTTGACATCCTCTGACACTCCTAGAGATAGGATTTTCCCCTTCGGGGGACAGAGTGACAGGTGGTGCATGGTTGTCGTCAGCTCGTGTCGTGAGATGTTGGGTTAAGTCCCGCAA	864	0	2485	1360	0	923	213	1044	1056	333	224	355	2050	261	3241	0	0	3459	316	627	1711	1015	0	58	2568	0	59	139	468	0	0	0	423	1451	0	0	0	0	0	0	0	138	124	127	11590	245
d89d0d2ba06be4e7c3f678b2c28e1f1e	bASV91	d__Bacteria; p__Proteobacteria; c__Gammaproteobacteria; o__Burkholderiales; f__Burkholderiaceae; g__Cupriavidus	GTAGTCCACGCCCTAAACGATGTCAACTAGTTGTTGGGGATTCATTTCTTCAGTAACGTAGCTAACGCGTGAAGTTGACCGCCTGGGGAGTACGGTCGCAAGATTAAAACTCAAAGGAATTGACGGGGACCCGCACAAGCGGTGGATGATGTGGATTAATTCGATGCAACGCGAAAAACCTTACCTACCCTTGACATGCCACTAACGAAGCAGAGATGCATCAGGTGCCCGAAAGGGAAAGTGGACACAGGTGCTGCATGGCTGTCGTCAGCTCGTGTCGTGAGATGTTGGGTTAAGTCCCGCAAC	867	170	280	257	0	722	234	539	214	491	608	223	555	303	164	0	663	780	201	425	2370	1067	1296	304	3240	0	209	148	985	0	270	259	199	152	538	0	2591	91	77	229	115	134	221	334	734	178
b509cf3b204a66b9bbac02f3d54b793a	bASV92	d__Bacteria; p__Actinobacteriota; c__Thermoleophilia; o__Gaiellales	GTAGTCCACGCCGTAAACGATGGGTGCTAGGTGTGGGAGGTGTCGACTCCTTCCGTGCCGTAGCTAACGCATTAAGCACCCCGCCTGGGGAGTACGGCCGCAAGGCTAAAACTCAAAGGAATTGACGGGGCCCCGCACAAGCAGCGGAGCATGTGGTTTAATTCGATGCAACGCGAAGAACCTTACCAGGGCTTGACATGCACTGGAAAACCGTAGAAATACGGTCCTCCTTCGGGACTAGTGCACAGGTGGTGCATGGCTGTCGTCAGCTCGTGTCGTGAGATGTTGGGTTAAGTCCCGCAACGA	1313	179	971	1555	0	783	259	2303	1025	679	301	526	1220	657	757	0	1097	3151	329	428	800	774	607	79	829	979	455	304	1365	1107	420	823	722	941	663	889	0	0	958	1730	1666	883	2313	3444	2318	527
56b3fb4807511002706784565a7a3ab9	bASV93	d__Bacteria; p__Actinobacteriota; c__Actinobacteria; o__Propionibacteriales; f__Propionibacteriaceae; g__Microlunatus	GTAGTCCACGCCGTAAACGGTGGGCACTAGGTGTGGGGAACATTCCACGTTCTCCGTGCCGAAGCTAACGCATTAAGTGCCCCGCCTGGGGAGTACGGCCGCAAGGCTAAAACTCAAAGGAATTGACGGGGGCCCGCACAAGCGGCGGAGCATGCGGATTAATTCGATGCAACGCGAAGAACCTTACCTGGGTTTGACATATACCGGAAAGCTGCAGAGATGTAGCCCCCGCAAGGTCGGTATACAGGTGGTGCATGGCTGTCGTCAGCTCGTGTCGTGAGATGTTGGGTTAAGTCCCGCAACGAG	68	98	171	7357	0	1979	600	10864	4032	3161	3169	0	941	1118	2399	0	3531	3555	283	1929	3347	2437	55	55	2941	5882	213	203	1483	346	120	118	1747	1950	224	933	0	0	159	510	321	428	415	738	2174	892
cf788707e15845082273d691567ba047	bASV94	d__Bacteria; p__Proteobacteria; c__Alphaproteobacteria; o__Rhizobiales; f__Hyphomicrobiaceae; g__uncultured; s__uncultured_bacterium	GTAGTCCACGCCGTAAACGATGGATGCTAGCCGTCGGCAAGCTTGCTTGTCGGTGGCGCAGCTAACGCATTAAGCATCCCGCCTGGGGAGTACGGCCGCAAGGTTAAAACTCAAAGGAATTGACGGGGGCCCGCACAAGCGGTGGAGCATGTGGTTTAATTCGACGCAACGCGAAGAACCTTACCAGCTCTTGACATGTCAGGTCGGTTTCCAGAGATGGATTCCTCCCAGCAATGGGCCTGAACACAGGTGCTGCATGGCTGTCGTCAGCTCGTGTCGTGAGATGTTGGGTTAAGTCCCGCAACG	709	294	814	438	475	470	324	562	209	710	804	663	227	364	664	0	1081	2010	187	463	765	778	93	66	709	844	0	0	321	1035	248	661	643	527	380	184	115	86	435	857	1202	226	672	570	914	365
2562c9bdf1326226b91be1c8a8bbf60d	bASV95	d__Bacteria; p__Proteobacteria; c__Alphaproteobacteria; o__Rhizobiales; f__Xanthobacteraceae; g__uncultured	GTAGTCCACGCCGTAAACGATGGATGCTAGCCGTTGGCAGGCTTGCCTGTCAGTGGCGCAGCTAACGCATTAAGCATCCCGCCTGGGGAGTACGGTCGCAAGATTAAAACTCAAAGGAATTGACGGGGGCCCGCACAAGCGGTGGAGCATGTGGTTCAATTCGAAGCAACGCGCAGAACCTTACCAACCTTTGACATGTCCCGTATGAGCACCAGAGATGGAGTTCTTCAGTTCGGCTGGCGGGAACACAGGTGCTGCATGGCTGTCGTCAGCTCGTGTCGTGAGATGTTGGGTTAAGTCCCGCAA	953	297	875	344	798	601	100	685	200	783	292	437	186	390	697	0	1339	1200	227	347	460	420	300	62	392	0	102	131	494	1402	406	923	296	256	744	848	164	66	695	1798	1242	414	844	1010	642	330
6a828476b35a0d5773dea1ed94833576	bASV96	d__Bacteria; p__Firmicutes; c__Bacilli; o__Bacillales; f__Bacillaceae; g__Bacillus	GTAGTCCACGCTGTAAACGATGAGTGCTAAGTGTTAGAGGGTTTCCGCCCTTTAGTGCTGAAGTTAACGCATTAAGCACTCCGCCTGGGGAGTACGGTCGCAAGACTGAAACTCAAAGGAATTGACGGGGGCCCGCACAAGTGGTGGAGCATGTGGTTTAATTCGAAGCAACGCGAAGAACCTTACCAGGTCTTGACATCCTCTGACAACCCTAGAGATAGGGCGTTCCCTTCGGGGACAGAGTGACAGGTGGTGCATGGTTGTCGTCAGCTCGTGTCGTGAGATGTTGGGTTAAGTCCCGCAACG	1297	0	699	3039	0	1644	3097	1910	1775	496	625	654	3103	83	319	0	1725	4629	6063	1769	9899	2272	0	0	14767	1507	0	0	137	0	0	0	746	1572	179	0	0	0	0	0	0	0	0	0	2173	287
35913bb8a5648755a94af5c8f21b385a	bASV98	d__Bacteria; p__Proteobacteria; c__Gammaproteobacteria; o__Burkholderiales; f__Methylophilaceae	GTAGTCCACGCCCTAAACGATGTCTACTAGTTGTTGGTGGAGTAAAATCCATGAGTAACGCAGCTAACGCGTGAAGTAGACCGCCTGGGGAGTACGGTCGCAAGATTAAAACTCAAAGGAATTGACGGGGGCCCGCACAAGCGGTGGATTATGTGGATTAATTCGATGCAACGCGAAAAACCTTACCTGGCCTTGACATGCCACTAACGAAGCAGAGATGCATTAGGTGCTCGAAAGAGAAAGTGGACACAGGTGCTGCATGGCTGTCGTCAGCTCGTGTCGTGAGATGTTGGGTTAAGTCCCGCA	0	154	0	0	0	0	0	60	0	0	0	0	0	43	175	0	0	20	0	0	0	0	0	0	126	0	0	0	95	0	0	0	52	0	0	0	0	930	0	75	667	558	404	0	0	0
baac04f036bc79c78a2999124bed56b9	bASV99	d__Bacteria; p__Proteobacteria; c__Alphaproteobacteria; o__Rhizobiales; f__Xanthobacteraceae; g__Rhodoplanes	GTAGTCCACGCCGTAAACGATGGATGCTAGCCGTTGGCGGGTTTACTCGTCAGTGGCGCAGCTAACGCATTAAGCATCCCGCCTGGGGAGTACGGTCGCAAGATTAAAACTCAAAGGAATTGACGGGGGCCCGCACAAGCGGTGGAGCATGTGGTTCAATTCGAAGCAACGCGCAGAACCTTACCAGCCCTTGACATGCCACGACGGTTTCCAGAGATGGATTCTTCCCCGCAAGGGGCGTGGACACAGGTGCTGCATGGCTGTCGTCAGCTCGTGTCGTGAGATGTTGGGTTAAGTCCCGCAACG	0	0	23	7683	0	4991	1207	6521	6142	1025	300	0	1577	182	212	0	0	7504	2169	1106	2715	1201	1089	145	2048	1660	179	135	1105	336	296	242	1009	1431	42	939	26	0	50	92	115	265	366	550	856	371
537dfbf4b337a7debf38928f07182db6	bASV100	d__Bacteria; p__Proteobacteria; c__Alphaproteobacteria; o__Rhizobiales; f__Rhizobiaceae; g__Allorhizobium-Neorhizobium-Pararhizobium-Rhizobium	GTAGTCCACGCCGTAAACGATGAATGTTAGCCGTCGGGCAGTATACTGTTCGGTGGCGCAGCTAACGCATTAAACATTCCGCCTGGGGAGTACGGTCGCAAGATTAAAACTCAAAGGAATTGACGGGGGCCCGCACAAGCGGTGGAGCATGTGGTTTAATTCGAAGCAACGCGCAGAACCTTACCAGCCCTTGACATCCTGTGTTACCTCTAGAGATAGGGGGTCCACTTCGGTGGCGCAGAGACAGGTGCTGCATGGCTGTCGTCAGCTCGTGTCGTGAGATGTTGGGTTAAGTCCCGCAACGAG	0	161	38	0	364	69	0	0	0	898	0	0	0	0	0	0	0	0	0	0	0	0	1032	1154	0	0	0	0	36	0	33	0	0	0	559	0	459	88	31	56	25	0	38	0	0	0
874a68f66399ca3bf1db9368f09fe098	bASV101	d__Bacteria; p__Proteobacteria; c__Gammaproteobacteria; o__Enterobacterales	GTAGTCCACGCCGTAAACGATGTCGACTTGGAGGTTGTTCCCTTGAGGAGTGGCTTCCGGAGCTAACGCGTTAAGTCGACCGCCTGGGGAGTACGGCCGCAAGGTTAAAACTCAAATGAATTGACGGGGGCCCGCACAAGCGGTGGAGCATGTGGTTTAATTCGATGCAACGCGAAGAACCTTACCTACTCTTGACATCCACGGAATTTAGCAGAGATGCTTTAGTGCCTTCGGGAACCGTGAGACAGGTGCTGCATGGCTGTCGTCAGCTCGTGTTGTGAAATGTTGGGTTAAGTCCCGCAACGA	134	0	474	0	0	0	0	143	0	68	0	180	0	0	0	0	0	105	182	222	212	652	69	0	145	0	0	0	0	0	0	0	57	0	698	0	0	0	0	0	0	0	0	0	73	0
25015981c57615985b456bbc751425d0	bASV102	d__Bacteria; p__Proteobacteria; c__Gammaproteobacteria; o__Burkholderiales; f__Burkholderiaceae; g__Burkholderia-Caballeronia-Paraburkholderia	GTAGTCCACGCCCTAAACGATGTCAACTAGTTGTCGGGTCTTCATTGACTTGGTAACGAAGCTAACGCGTGAAGTTGACCGCCTGGGGAGTACGGTCGCAAGATTAAAACTCAAAGGAATTGACGGGGACCCGCACAAGCGGTGGATGATGTGGATTAATTCGATGCAACGCGAAAAACCTTACCTACCCTTGACATGTACGGAACCTTGCTGAGAGGTGAGGGTGCCCGAAAGGGAGCCGTAACACAGGTGCTGCATGGCTGTCGTCAGCTCGTGTCGTGAGATGTTGGGTTAAGTCCCGCAACG	0	0	0	0	0	828	0	120	55	348	81	0	215	174	0	0	2758	43	215	367	203	462	424	135	333	0	49	0	110	0	84	48	0	0	0	0	2613	265	0	0	0	0	17	0	0	0
63da74844f7181950b06681600131717	bASV103	d__Bacteria; p__Proteobacteria; c__Gammaproteobacteria; o__Enterobacterales; f__Erwiniaceae; g__Pantoea	GTAGTCCACGCCGTAAACGATGTCGACTTGGAGGTTGTTCCCTTGAGGAGTGGCTTCCGGAGCTAACGCGTTAAGTCGACCGCCTGGGGAGTACGGCCGCAAGGTTAAAACTCAAATGAATTGACGGGGGCCCGCACAAGCGGTGGAGCATGTGGTTTAATTCGATGCAACGCGAAGAACCTTACCTACTCTTGACATCCACGGAATTTGGCAGAGATGCCTTAGTGCCTTCGGGAACCGTGAGACAGGTGCTGCATGGCTGTCGTCAGCTCGTGTTGTGAAATGTTGGGTTAAGTCCCGCAACGA	93	0	90	0	0	72	39	0	49	0	0	451	0	0	0	0	0	0	0	0	68	0	99	0	255	0	0	0	0	0	0	0	0	0	0	0	0	0	0	0	0	0	0	0	0	30
49a25b53ea19118a09dd5053cb16ae84	bASV104	d__Bacteria; p__Proteobacteria; c__Gammaproteobacteria; o__Enterobacterales; f__Erwiniaceae; g__Pantoea; s__Pantoea_rwandensis	GTAGTCCACGCCGTAAACGATGTCGACTTGGAGGTTGTGCCCTTGAGGCGTGGCTTCCGGAGCTAACGCGTTAAGTCGACCGCCTGGGGAGTACGGCCGCAAGGTTAAAACTCAAATGAATTGACGGGGGCCCGCACAAGCGGTGGAGCATGTGGTTTAATTCGATGCAACGCGAAGAACCTTACCTACTCTTGACATCCAGCGAATTCGGTAGAGATACCTTAGTGCCTTCGGGAACGCTGAGACAGGTGCTGCATGGCTGTCGTCAGCTCGTGTTGTGAAATGTTGGGTTAAGTCCCGCAACGA	46	0	199	0	0	15	0	0	46	23	0	68	38	58	0	0	0	0	0	42	0	31	0	0	52	0	0	0	13	0	0	0	0	0	0	0	29	0	0	0	0	0	21	0	185	0
558bd13a7b4755e799c83a6f9f3295b3	bASV105	d__Bacteria; p__Proteobacteria; c__Gammaproteobacteria; o__Xanthomonadales; f__Rhodanobacteraceae; g__Dyella	GTAGTCCACGCCCTAAACGATGCGAACTGGATGTTGGTCTCAACTCGGAGATCAGTGTCGAAGCTAACGCGTTAAGTTCGCCGCCTGGGGAGTACGGTCGCAAGACTGAAACTCAAAGGAATTGACGGGGGCCCGCACAAGCGGTGGAGTATGTGGTTTAATTCGATGCAACGCGAAGAACCTTACCTGGCCTTGACATGTCTGGAATCCTGCAGAGATGCGGGAGTGCCTTCGGGAATCAGAACACAGGTGCTGCATGGCTGTCGTCAGCTCGTGTCGTGAGATGTTGGGTTAAGTCCCGCAACG	0	0	0	41	623	0	25	0	13	142	0	0	106	0	60	0	442	15	73	61	81	0	173	1181	83	0	28	0	126	0	39	0	0	0	197	0	1953	301	13	0	11	0	0	0	0	0
efb64bd407cc969888363f90113d85cc	bASV106	d__Bacteria; p__Proteobacteria; c__Gammaproteobacteria; o__Burkholderiales; f__SC-I-84; g__SC-I-84	GTAGTCCACGCCCTAAACGATGTCAACTGGGTGTTGGGGAAGCGATTCCTCAGTACCGTAGCTAACGCGTGAAGTTGACCGCCTGGGGAGTACGGCCGCAAGGTTAAAACTCAAAGGAATTGACGGGGACCCGCACAAGCGGTGGATGATGTGGATTAATTCGATGCAACGCGAACAACCTTACCTACCCTTGACATGTCCGGAACCCCACTGAGAGGTGGGGGTGCCCGAAAGGGAATCGGAACACAGGTGCTGCATGGCTGTCGTCAGCTCGTGTCGTGAGATGTTGGGTTAAGTCCCGCAACG	1103	134	872	501	0	644	90	851	272	522	439	412	1852	847	731	0	808	3665	154	267	476	771	961	56	606	1603	578	502	3062	2541	1000	2018	727	702	1805	1054	0	0	205	496	405	105	122	375	348	711
b754fb653c9af33be64061c01a2cf39e	bASV107	d__Bacteria; p__Proteobacteria; c__Gammaproteobacteria; o__Pseudomonadales; f__Pseudomonadaceae; g__Pseudomonas	GTAGTCCACGCCGTAAACGATGTCAACTAGCCGTTGGGATCCTTGAGATCTTAGTGGCGCAGCTAACGCATTAAGTTGACCGCCTGGGGAGTACGGCCGCAAGGTTAAAACTCAAATGAATTGACGGGGGCCCGCACAAGCGGTGGAGCATGTGGTTTAATTCGAAGCAACGCGAAGAACCTTACCTGGCCTTGACATGCTGAGAACTTTCCAGAGATGGATTGGTGCCTTCGGGAACTCAGACACAGGTGCTGCATGGCTGTCGTCAGCTCGTGTCGTGAGATGTTGGGTTAAGTCCCGTAACGA	128	0	219	0	0	0	0	145	0	0	0	0	0	99	0	0	0	0	0	83	0	0	711	85	0	0	0	0	789	0	0	0	0	0	0	0	81	90	0	139	84	0	42	0	0	0
1b2504ab5a6cbad598df29927ec806af	bASV108	d__Bacteria; p__Proteobacteria; c__Gammaproteobacteria; o__Burkholderiales; f__Comamonadaceae; g__Variovorax	GTAGTCCACGCCCTAAACGATGTCAACTGGTTGTTGGGAATTCACTTTCTCAGTAACGAAGCTAACGCGTGAAGTTGACCGCCTGGGGAGTACGGCCGCAAGGTTGAAACTCAAAGGAATTGACGGGGACCCGCACAAGCGGTGGATGATGTGGTTTAATTCGATGCAACGCGAAAAACCTTACCCACCTTTGACATGTACGGAATTTGCCAGAGATGGCTTAGTGCTCGAAAGAGAACCGTAACACAGGTGCTGCATGGCTGTCGTCAGCTCGTGTCGTGAGATGTTGGGTTAAGTCCCGCAACG	227	460	228	166	1185	365	85	401	90	547	277	69	262	236	1046	0	693	715	133	202	717	792	384	1006	1212	540	104	132	319	248	243	171	490	182	116	548	855	110	0	0	0	83	181	199	202	63
4356fbd4cf3e7d76ac9e6e6fab81edf0	bASV109	d__Bacteria; p__Proteobacteria; c__Alphaproteobacteria; o__Rhizobiales; f__Hyphomicrobiaceae; g__Pedomicrobium	GTAGTCCACGCCGTAAACGATGGATGCTAGCCGTCAGCAAGCATGCTTGTTGGTGGCGCAGCTAACGCATTAAGCATCCCGCCTGGGGAGTACGGCCGCAAGGTTAAAACTCAAAGGAATTGACGGGGGCCCGCACAAGCGGTGGAGCATGTGGTTTAATTCGACGCAACGCGAAGAACCTTACCAGCCCTTGACATGCCCGGACGGTTTCCAGAGATGGATTCCTCCTAGCAATAGGTCGGGACACAGGTGCTGCATGGCTGTCGTCAGCTCGTGTCGTGAGATGTTGGGTTAAGTCCCGCAACG	271	222	535	860	938	741	0	951	529	440	663	159	704	601	614	0	0	963	0	399	801	362	587	80	663	766	160	160	1325	1389	590	1228	426	221	327	743	142	68	425	741	985	205	612	1028	1119	791
3e1c4e20e03ecd733daf02644e1c8441	bASV110	d__Bacteria; p__Proteobacteria; c__Gammaproteobacteria; o__Gammaproteobacteria_Incertae_Sedis; f__Unknown_Family; g__Acidibacter	GTAGTCCACGCCATAAACGATGAGGACTAGACGTTGGAGGGGTAAGCCTTTCAGTGTCGTAGCTAACGCGCTAAGTCCTCCGCCTGGGGAGTACGGCCGCAAGGTTGAAACTCAAAGGAATTGACGGGGACCCGCACAAGCGGTGGAGCATGTGGTTTAATTCGATGCAACGCGAAGAACCTTACCTGGTCTTGACATCCATGGAACCCTGCAGAGATGCGGGGGTGCCGTAAGGAACCATGAGACAGGTGCTGCATGGCTGTCGTCAGCTCGTGTCGTGAGATGTTGGGTTAAGTCCCGCAACGA	417	339	331	387	536	471	118	417	285	458	420	104	338	576	195	0	813	720	138	432	498	915	279	73	619	0	120	104	674	1127	543	980	315	227	388	585	55	0	163	765	404	123	140	181	1255	169
126ff443685d7cb1782b5921bab5831d	bASV111	d__Bacteria; p__Proteobacteria; c__Alphaproteobacteria; o__Rhizobiales; f__Methyloligellaceae	GTAGTCCACGCCGTAAACTATGGGTGCTAGCCGTCGGTCGGCATGCCGGTCGGTGGCGCAGCCAACGCATTAAGCACCCCGCCTGGGGAGTACGGTCGCAAGATTAAAACTCAAAGGAATTGACGGGGGCCCGCACAAGCGGTGGAGCATGTGGTTTAATTCGAGGCAACGCGAAGAACCTTACCAGCCCTTGACTTCCCGATCGGGGCTCCGGAGACGGAGCTCTTCAATTGGTCGGTGACAGGTGCTGCATGGCTGTCGTCAGCTCGTGTCGTGAGATGTTGGGTTAAGTCCCGCAACGAGCGC	1120	264	1008	2598	0	1893	472	3746	1707	2298	1941	425	509	848	468	0	0	5086	562	1243	3073	1734	239	0	2014	1827	264	232	996	0	119	200	898	1086	394	0	0	0	152	589	599	197	323	404	219	949
1b3a18e6dc737a25be2bee01c147ceee	bASV112	d__Bacteria; p__Actinobacteriota; c__MB-A2-108; o__MB-A2-108; f__MB-A2-108; g__MB-A2-108	GTAGTCCTAGCCGTAAACGTTGGGTGCTAGGTGTGGGCGGATATCGACCCCGTCCGTGCCGAAGCTAACGCATTAAGCACCCCGCCTGGGGAGTACGGCCGCAAGGCTAAAACTCAAAGGAATTGACGGGGGCCCGCACAAGCGGCGGAGCATGCGGCTTAATTCGATGCAACGCGAAGAACCTTACCTGGGCTTGACATGCAGGGCAAAGCCGGTGAAAGCCGGCGCTCTACGGAGCCTGCACAGGTGGTGCATGGCTGTCGTCAGCTCGTGCCGTGAGGTGTTGCCTTAAGTGGCGCAACGAGC	407	0	352	4037	0	1193	353	7617	2975	1464	943	155	1560	553	1023	0	1064	5641	517	1530	4102	1310	204	20	3645	3054	454	410	1611	514	332	284	1143	1640	178	1739	0	0	246	385	756	805	1927	2504	786	1230
404007c7b07e031d0ead4589b8f37a77	bASV113	d__Bacteria; p__Actinobacteriota; c__Actinobacteria; o__Micrococcales; f__Microbacteriaceae; g__Agromyces	GTAGTCCACGCCGTAAACGTTGGGCGCTAGATGTGGGGACCTTTCCACGGTTTCCGTGTCGTAGCTAACGCATTAAGCGCCCCGCCTGGGGAGTACGGCCGCAAGGCTAAAACTCAAAGGAATTGACGGGGGCCCGCACAAGCGGCGGAGCATGCGGATTAATTCGATGCAACGCGAAGAACCTTACCAAGGCTTGACATATACGAGAACGCTGCAGAAATGTAGAACTCTTTGGACACTCGTATACAGGTGGTGCATGGTTGTCGTCAGCTCGTGTCGTGAGATGTTGGGTTAAGTCCCGCAACG	1517	931	1126	61	409	192	63	133	53	183	141	547	63	340	756	0	0	256	0	101	96	122	286	108	65	0	103	160	466	573	253	375	146	93	547	570	0	0	422	726	887	832	1145	1010	1008	129
54f216771f316181ce4f42975ab939e4	bASV114	d__Bacteria; p__Proteobacteria; c__Alphaproteobacteria; o__Dongiales; f__Dongiaceae; g__Dongia	GTAGTCCACGCCGTAAACGATGAATGCTAGACGTTGGCGAGCATGCTCGTCAGTGTCGGAGCTAACGCATTAAGCATTCCGCCTGGGGAGTACGGTCGCAAGATTAAAACTCAAAGGAATTGACGGGGGCCCGCACAAGCGGTGGAGCATGTGGTTTAATTCGAAGCAACGCGCAGAACCTTACCAACCCTTGACATGGGACGTATGGGCTCGAGAGATCGGGTCCTTCAGTTCGGCTGGCGTCCACACAGGTGCTGCATGGCTGTCGTCAGCTCGTGTCGTGAGATGTTGGGTTAAGTCCCGCAA	316	46	157	842	0	301	86	1060	653	780	658	236	369	239	843	80	506	720	100	261	1196	812	0	89	984	614	39	42	996	1632	1049	1585	542	470	659	672	0	0	859	2401	982	399	782	1482	5318	875
0be43c63fc807e3dfad454f24f65c210	bASV115	d__Bacteria; p__Actinobacteriota; c__MB-A2-108; o__MB-A2-108; f__MB-A2-108; g__MB-A2-108	GTAGTCCTAGCCGTAAACGTTGGGTGCTAGGTGTGGGCGGATATCGACCCCGTCCGTGCCGAAGCTAACGCATTAAGCACCCCGCCTGGGGAGTACGGCCGCAAGGCTAAAACTCAAAGGAATTGACGGGGGCCCGCACAAGCGGCGGAGCATGCGGCTTAATTCGATGCAACGCGAAGAACCTTACCTGGGCTTGACATGCAGGGTGAAACCCGTGAAAGCGGGCGCTCTTCGGAGCCTGCACAGGTGGTGCATGGCTGTCGTCAGCTCGTGCCGTGAGGTGTTGCCTTAAGTGGCGCAACGAGC	2119	346	802	620	0	591	0	1024	444	512	387	639	120	249	708	0	0	1742	0	221	411	86	30	0	417	872	416	618	3112	2138	983	1457	579	1004	1280	2301	0	0	1135	2250	3917	1004	1764	3123	189	611
56b6546848785bdb74e6f1d2b10c92d9	bASV116	d__Bacteria; p__Proteobacteria; c__Alphaproteobacteria; o__Rhizobiales; f__Xanthobacteraceae; g__uncultured	GTAGTCCACGCCGTAAACGATGGATGCTAGCCGTTGGTGGGTTTACCCTTCAGTGGCGCAGCTAACGCATTAAGCATCCCGCCTGGGGAGTACGGTCGCAAGATTAAAACTCAAAGGAATTGACGGGGGCCCGCACAAGCGGTGGAGCATGTGGTTCAATTCGAAGCAACGCGCAGAACCTTACCAGCCTTTGACATCCCGGTCGCGGGCACCAGAGATGGAGCCCTTCAGTTCGGCTGGACCGGAGACAGGTGCTGCATGGCTGTCGTCAGCTCGTGTCGTGAGATGTTGGGTTAAGTCCCGCAA	34	0	49	943	836	1871	404	1111	645	462	300	0	3445	807	408	0	0	1737	693	186	380	670	344	111	355	0	504	554	3440	0	0	72	549	443	0	374	0	0	0	0	0	181	172	348	127	1070
7e1bf8409f643b006b4f95a1cb7664c0	bASV117	d__Bacteria; p__Proteobacteria; c__Alphaproteobacteria; o__Rhizobiales; f__Methyloligellaceae; g__uncultured; s__uncultured_Rhodobium	GTAGTCCACGCCGTAAACTATGGGTGCTAGCCGTCGGTCGGCATGCCGGTCGGTGGCGCAGCAAACGCATTAAGCACCCCGCCTGGGGAGTACGGTCGCAAGATTAAAACTCAAAGGAATTGACGGGGGCCCGCACAAGCGGTGGAGCATGTGGTTTAATTCGAGGCAACGCGAAGAACCTTACCAGCCCTTGACTTCCCGATCGGGGGACCAGAGATGGACCTCTTCAATTGGTCGGTGACAGGTGCTGCATGGCTGTCGTCAGCTCGTGTCGTGAGATGTTGGGTTAAGTCCCGCAACGAGCGC	0	0	0	0	0	0	0	0	0	0	0	0	0	0	0	0	0	0	0	0	0	0	0	0	0	0	0	0	0	0	0	0	0	0	0	0	0	0	0	0	0	0	0	0	0	0
7428e6470e1a21ba866f400499b0547a	bASV118	d__Bacteria; p__Actinobacteriota; c__Acidimicrobiia; o__Microtrichales; f__Ilumatobacteraceae; g__Ilumatobacter	GTAGTCCACGCCGTAAACGTTGGGCACTAGGTGTGGGTCTCAACCAACGAGATCCGCGCCGTCGCTAACGCATTAAGTGCCCCGCCTGGGGAGTACGGTCGCAAGACTAAAACTCAAAGGAATTGACGGGGGCCCGCACAAGCAGCGGAGCGTGTTGCTTAATTCGATGCAACGCGAAGAACCTTACCTGGGTTTGACATGTCCGGAAAAGCTCTAGAGATAGGGTGTCCTTCGGGGCCGGACACAGGTGGTGCATGGCTGTCGTCAGCTCGTGTCGTGAGATGTTGGGTTAAGTCCCGCAACGAG	526	364	465	311	528	429	88	609	215	697	385	268	447	485	935	0	395	1365	100	205	427	362	560	42	424	489	285	288	1381	614	230	393	486	440	654	628	65	17	381	949	1084	1040	1447	2636	408	527
1c733c4c93855e608da77b2bb0f78e0e	bASV119	d__Bacteria; p__Proteobacteria; c__Gammaproteobacteria; o__Burkholderiales; f__Sutterellaceae; g__uncultured	GTAGTCCACGCCCTAAACGATGTCTACTAGTTGTCGGAGGGTAACTCCTTCGGTAACGCAGCTAACGCGTGAAGTAGACCGCCTGGGGAGTACGGTCGCAAGATTAAAACTCAAAGGAATTGACGGGGACCCGCACAAGCGGTGGATGATGTGGATTAATTCGATGCAACGCGAAAAACCTTACCTACCCTTGACATGCCACTAACGAAGCAGAGATGCATTAGGTGCCCGAAAGGGAAAGTGGACACAGGTGCTGCATGGCTGTCGTCAGCTCGTGTCGTGAGATGTTGGGTTAAGTCCCGCAAC	1686	367	1026	228	274	700	0	498	127	273	318	570	2671	1304	1192	0	0	991	0	103	73	355	1172	65	97	372	425	302	2586	1108	377	740	234	219	1446	822	0	0	108	389	264	167	129	384	846	720
379f4311a85703caab8db9def0afca77	bASV120	d__Bacteria; p__Acidobacteriota; c__Acidobacteriae; o__Subgroup_2; f__Subgroup_2; g__Subgroup_2; s__uncultured_Acidobacteria	GTAGTCCTAGCCCTAAACGATCAGGACTTGGGGTGCCACCCGTTCGGGTGTCGTCCCGGAGCTAACGCGTTAAGTCCTGCACCTGGGGAGTACGGTCGCAAGACTGAAACTCAAAGGAATTGACGGGGGCCCGCACAAGCGGTGGAACATGTGGTTCAATTCGACGCTACGCGAGGAACCTTACCTGGGCTCGAAATGCTGGTGACCAGCTGTAGAAATACGGCCTTCCCGCAAGGGACACCAGTATAGGCGCTGCATGGCTGTCGTCAGCTCGTGCCGTGAGGTGTTGGGTTAAGTCCCGCAACG	0	0	0	600	0	358	114	237	254	0	0	0	337	73	0	0	0	113	143	921	91	107	2603	2871	150	0	0	0	0	0	1155	0	0	0	0	539	2798	1631	0	0	0	0	0	0	0	0
20cd751ee1b41d522a1662ac03a2ed70	bASV121	d__Bacteria; p__Actinobacteriota; c__Acidimicrobiia; o__IMCC26256; f__IMCC26256; g__IMCC26256	GTAGTCCACGCCGTAAACGTTGGGCACTAGGTGTGGGACTCTATCGACGGGTTCCGTGCCGTAGCTAACGCATTAAGTGCCCCGCCTGGGGAGTACGGCCGCAAGGCTAAAACTCAAAGGAATTGACGGGGGCCCGCACAAGCGGCGGAGCATGTGGCTTAATTCGATGCGACGCGAAGAACCTTACCTGGGTTTGACATGTAGGGAAAAGCCGTAGAGATACGGTGTCCTTCGGGGCCTTACACAGGTGGTGCATGGCTGTCGTCAGCTCGTGTCGTGAGATGTTGGGTTAAGTCCCGCAACGAG	274	0	44	1344	1532	257	406	2037	684	418	265	90	1211	675	474	0	1287	479	283	316	567	756	1124	94	496	925	193	146	479	1380	265	463	226	233	144	529	291	126	142	184	253	348	390	502	93	681
a45bc17abe11bbf3e9bd6e5fb4a8d734	bASV122	d__Bacteria; p__Actinobacteriota; c__Actinobacteria; o__Propionibacteriales; f__Nocardioidaceae; g__Nocardioides	GTAGTCCACACCGTAAACGTTGGGCGCTAGGTGTGGGATCCATTCCACGGGTTCCGTGCCGCAGCTAACGCATTAAGCGCCCCGCCTGGGGAGTACGGCCGCAAGGCTAAAACTCAAAGGAATTGACGGGGGCCCGCACAAGCGGCGGAGCATGCGGATTAATTCGATGCAACGCGAAGAACCTTACCTGGGTTTGACATACACCGGAAAGCATCAGAGATGGTGCCCCTTTTTGTCGGTGTACAGGTGGTGCATGGCTGTCGTCAGCTCGTGTCGTGAGATGTTGGGTTAAGTCCCGCAACGAGC	1290	293	784	0	0	100	0	294	0	311	0	419	160	420	298	0	0	572	0	0	0	155	405	128	75	0	337	346	657	1665	288	474	184	145	446	1970	230	63	451	819	1365	1435	1532	2380	291	184
47f621af802b32bb16d2a75569545d88	bASV123	d__Bacteria; p__Proteobacteria; c__Alphaproteobacteria; o__Sphingomonadales; f__Sphingomonadaceae; g__Sphingomonas	GTAGTCCACGCCGTAAACGATGATGACTAGCTGTCGGGGCGCTTAGCGTTCCGGTGGCGCAGCTAACGCGTTAAGTCATCCGCCTGGGGAGTACGGCCGCAAGGTTAAAACTCAAAGAAATTGACGGGGGCCTGCACAAGCGGTGGAGCATGTGGTTTAATTCGAAGCAACGCGCAGAACCTTACCAGCGTTTGACATGGTAGGACGGTTTCCAGAGATGGATTCCTTCCCTTACGGGACCTACACACAGGTGCTGCATGGCTGTCGTCAGCTCGTGTCGTGAGATGTTGGGTTAAGTCCCGCAAC	0	0	0	1114	0	304	123	1925	816	223	213	0	1628	160	0	0	286	349	200	297	793	286	3276	157	540	506	780	538	1586	0	191	209	197	0	201	1951	1745	407	98	189	115	1754	1591	2914	0	40
39c7c7a5f373336b86ef141cbb3df166	bASV124	d__Bacteria; p__Actinobacteriota; c__Thermoleophilia; o__Gaiellales; f__uncultured; g__uncultured; s__uncultured_prokaryote	GTAGTCCACGCCGTAAACGATGGGTGCTAGGTGTGGGGAGTGTCGACTCTCTCCGTGCCGAAGCTAACGCATTAAGCACCCCGCCTGGGGAGTACGGCCGCAAGGCTAAAACTCAAAGGAATTGACGGGGGCCCGCACAAGCAGCGGAGCATGTTCTTTAATTCGACGCAACGCGAAGAACCTTACCAGGGCTTGACATGCACGGGAATGTCATAGAGATATGGCAGCCCTTCGGGGCTCGTGCACAGGTGTTGCATGGCCGTCGTCAGCTCGTGTCGTGAGATGTTGGGTTAAGTCCCGCAACGA	2395	205	1809	2508	0	756	16	4444	1554	926	480	875	612	454	1503	0	0	2772	0	489	848	264	68	0	777	473	390	215	2021	564	180	265	749	876	941	691	0	0	532	1567	1231	562	708	1237	557	1141
91c3d2f4410268cf0b29f06f026c3b16	bASV125	d__Bacteria; p__Actinobacteriota; c__Thermoleophilia; o__Solirubrobacterales; f__Solirubrobacteraceae; g__Solirubrobacter; s__metagenome	GTAGTCCACGCTGTAAACGATGGGCACTAGGTGTGGGGGGTGTCGACTCCCTCCGTGCCGAAGCTAACGCATTAAGTGCCCCGCCTGGGGAGTACGGCCGCAAGGCTAAAACTCAAAGGAATTGACGGGGGCCCGCACAAGCAGCGGAGCATGTGGTTTAATTCGACGCAACGCGAAGAACCTTACCTGGGCTTGACATGTTCCTGACCGTCCTGGAAACAGGGCTTCCCTTCGGGGCAGGATCACAGGTGGTGCATGGCTGTCGTCAGCTCGTGTCGTGAGATGTTGGGTTAAGTCCCGCAACGA	458	127	362	446	1536	409	233	752	246	934	651	195	337	327	501	0	1627	873	300	282	630	1180	755	113	665	2248	316	342	864	1064	266	279	389	357	395	1999	138	19	242	661	648	676	881	1381	326	461
b277585be5823e99f5c9090d8590f0bd	bASV126	d__Bacteria; p__Chloroflexi; c__TK10; o__TK10; f__TK10; g__TK10	GTAGTCCACGCCGTAAACGATGTCGACTAGGTGTCGGGGGTATCGACCCCCTCGGCGCCGCAGCTAACGCATTAAGTCGACCGCCTGGGGACTACGGCCGCAAGGCTAAAACTCAAAGGAATTGACGGGGGCCCGCACAAGCAGCGGAGCGTGTGGTTTAATTCGATGCAACGCGCAGAACCTTACCTCGGCTTGACATGCACGTGGTACTGACCCGAAAGGGAAGGGACCCGCGAGGGAGCGTGCACAGATGCTGCATGGCTGTCGTCAGCTCGTGCCGTGAGGTGTTGGGTTAAGTCCCGCAAC	0	0	0	0	1471	134	0	71	0	0	0	0	233	0	0	0	0	0	0	0	0	105	532	162	0	0	0	0	43	0	0	0	0	0	0	334	116	0	0	0	0	0	0	0	0	0
93f1c6fd70bae5d7f0c3586a5301e003	bASV127	d__Bacteria; p__Actinobacteriota; c__Acidimicrobiia; o__IMCC26256; f__IMCC26256; g__IMCC26256; s__uncultured_Ferrimicrobium	GTAGTCCACGCCGTAAACGTTGGGCACTAGGTGTGGGACTCTATCGACGGGTTCCGTGCCGTAGCTAACGCATTAAGTGCCCCGCCTGGGGAGTACGGCCGCAAGGCTAAAACTCAAAGGAATTGACGGGGGCCCGCACAAGCGGCGGAGCGTGTGGCTCAATTCGATGCAACGCGAAGAACCTTACCTGGGCTTGACATGTACGGTAAAGCGGGTGAAAGCCCGTGTGCTTCGGCGCCGTACACAGGTGGTGCATGGCTGTCGTCAGCTCGTGTCGTGAGATGTTGGGTTAAGTCCCGCAACGAG	151	0	68	1268	1542	603	313	1487	628	445	338	65	1121	381	289	0	1095	859	204	282	808	746	1039	175	845	850	175	139	431	485	297	540	388	436	181	862	177	192	154	229	219	189	276	472	219	303
913623b3a3539e8058491ac6a3b37af4	bASV128	d__Bacteria; p__Desulfobacterota; c__uncultured; o__uncultured; f__uncultured; g__uncultured; s__metagenome	GTAGTCCACGCTGTAAACGATGGGCACTAGGTGTCGCGGGTATTGACCCCTGCGGTGCCGCAGCTAACGCATTAAGTGCCCCGCCTGGGGACTACGGCCGCAAGGTTAAAACTCAAAGGAATTGACGGGGGCCCGCACAAGCGGTGGAGCATGTGGTTCAATTCGACGCAACGCGAAGAACCTTACCCGGGCTAGACAACAGAGGACAGCCTTAGAAATAAGGTCTTCCCTTCGGGGACCTCTGGTTCAGGTGCTGCATGGCTGTCGTCAGCTCGTGTCGTGAGATGTTGGGTTAAGTCCCGCAAC	450	143	201	887	636	649	188	1019	644	502	508	207	1657	459	330	0	812	1411	193	272	1029	632	764	77	1330	1198	270	277	2224	2210	1265	1708	816	796	358	945	77	92	147	346	208	237	483	799	532	429
53807fbfa100cb8cb4f0556df1b34c93	bASV129	d__Bacteria; p__Proteobacteria; c__Alphaproteobacteria; o__Sphingomonadales; f__Sphingomonadaceae; g__Sphingomonas	GTAGTCCACGCCGTAAACGATGATGACTAGCTGTCGGGGCGCTTGGCGTTTCGGTGGCGCAGCTAACGCGTTAAGTCATCCGCCTGGGGAGTACGGCCGCAAGGTTAAAACTCAAAGAAATTGACGGGGGCCTGCACAAGCGGTGGAGCATGTGGTTTAATTCGAAGCAACGCGCAGAACCTTACCAGCGTTTGACATGGTAGGACGGTTTCCAGAGATGGATTCCTTCCCTTACGGGACCTACACACAGGTGCTGCATGGCTGTCGTCAGCTCGTGTCGTGAGATGTTGGGTTAAGTCCCGCAAC	449	271	859	107	0	260	0	147	0	459	0	210	0	267	426	0	0	0	0	0	0	0	2618	186	0	0	727	685	3271	2060	543	546	0	0	553	2247	869	112	439	1489	813	1234	959	1914	357	149
51b6eece063b9d7ce02d700e23ed34de	bASV130	d__Bacteria; p__Firmicutes; c__Bacilli; o__Exiguobacterales; f__Exiguobacteraceae; g__Exiguobacterium	GTAGTCCACGCCGTAAACGATGAGTGCTAGGTGTTGGGGGGTTTCCGCCCCTCAGTGCTGAAGCTAACGCATTAAGCACTCCGCCTGGGGAGTACGGCCGCAAGGCTGAAACTCAAAGGAATTGACGGGGACCCGCACAAGCGGTGGAGCATGTGGTTTAATTCGAAGCAACGCGAAGAACCTTACCAACTCTTGACATCCCATTGACCGCTTGAGAGATCAAGTTTTCCCTTCGGGGACAATGGTGACAGGTGGTGCATGGTTGTCGTCAGCTCGTGTCGTGAGATGTTGGGTTAAGTCCCGCAA	99	32	470	55	0	0	814	22	0	21	28	18	265	37	457	0	0	4	24	53	0	0	138	106	0	0	0	0	12	152	0	0	0	0	78	0	0	7	0	0	0	0	0	0	0	83
b533db8bc33631736b7124ea959deb16	bASV131	d__Bacteria; p__Actinobacteriota; c__Thermoleophilia; o__Solirubrobacterales; f__67-14; g__67-14	GTAGTCCACGCCGTAAACGATGGGCACTAGGTGTGGGAGGTGTCGACTCCTCCCGTGCCGACGCTAACGCATTAAGTGCCCCGCCTGGGGAGTACGGCCGCAAGGCTAAAACTCAAAGGAATTGACGGGGGCCCGCACAAGCAGCGGAGCATGTGGTTTAATTCGACGCAACGCGAAGAACCTTACCTGGGTTTGACATGTTGGTGACCGGTGTGGAAACACACCTTTCCTTCGGGACACCATCACAGGTGGTGCATGGCTGTCGTCAGCTCGTGTCGTGAGATGTTGGGTTAAGTCCCGCAACGA	1028	247	404	1314	262	439	216	2417	731	1247	1220	306	200	563	623	0	1478	1403	328	469	1120	1182	564	72	1139	2582	209	288	815	1098	305	488	428	552	548	1917	20	0	548	1104	1640	488	745	1096	770	303
09908600fdb7ffad77122da356833f79	bASV132	d__Bacteria; p__Proteobacteria; c__Alphaproteobacteria; o__Rhizobiales; f__Xanthobacteraceae; g__uncultured; s__uncultured_Pseudolabrys	GTAGTCCACGCCGTAAACGATGGATGCTAGCCGTTGGCGGGTTTACTCGTCAGTGGCGCAGCTAACGCTTTAAGCATCCCGCCTGGGGAGTACGGTCGCAAGATTAAAACTCAAAGGAATTGACGGGGGCCCGCACAAGCGGTGGAGCATGTGGTTCAATTCGACGCAACGCGCAGAACCTTACCAGCCCTTGACATCCCGGTCGCGGGAACGAGAGATCGATCCCTTCAGTTCGGCTGGACCGGAGACAGGTGCTGCATGGCTGTCGTCAGCTCGTGTCGTGAGATGTTGGGTTAAGTCCCGCAA	0	0	0	0	2355	325	98	0	0	0	0	0	605	108	0	0	0	0	129	542	0	602	2093	1263	0	0	94	0	369	0	114	0	0	0	0	1334	362	227	0	0	0	57	52	0	0	0
d8f93b723db695118a0be5f2fa2b1c4d	bASV133	d__Bacteria; p__Proteobacteria; c__Alphaproteobacteria; o__Rhizobiales; f__Xanthobacteraceae; g__Pseudorhodoplanes	GTAGTCCACGCCGTAAACGATGGATGCTAGCCGTTGGCGAGCTTGCTCGTCAGTGGCGCAGCTAACGCATTAAGCATCCCGCCTGGGGAGTACGGTCGCAAGATTAAAACTCAAAGGAATTGACGGGGGCCCGCACAAGCGGTGGAGCATGTGGTTCAATTCGAAGCAACGCGCAGAACCTTACCAACCCTTGACATGTCCAGTATGGGTTTCAGAGATGAGACCCTTCAGTTCGGCTGGCTGGAACACAGGTGCTGCATGGCTGTCGTCAGCTCGTGTCGTGAGATGTTGGGTTAAGTCCCGCAA	1559	379	1318	88	563	158	0	115	56	281	196	585	210	599	826	0	0	223	53	505	77	189	448	65	101	392	120	124	772	647	232	503	140	58	787	554	25	27	551	1614	1418	270	550	737	337	144
a0e96bc9263c5d796920308cb2f9705d	bASV134	d__Bacteria; p__Actinobacteriota; c__Thermoleophilia; o__Gaiellales; f__Gaiellaceae; g__Gaiella	GTAGTCCACGCCGTAAACGATGGGTGCTAGGTGTGGGAGGTGTCGACTCCTTCCGTGCCGTAGCTAACGCATTAAGCACCCCGCCTGGGGAGTACGGCCGCAAGGCTAAAACTCAAAGGAATTGACGGGGCCCCGCACAAGCAGCGGAGCATGTGGTTTAATTCGATGCAACGCGAAGAACCTTACCAGGGCTTGACATGCACTGGAAAACCGTAGAAATACGGTCCTCCTTCGGGACCAGTGCACAGGTGGTGCATGGCTGTCGTCAGCTCGTGTCGTGAGATGTTGGGTTAAGTCCCGCAACGA	1868	220	851	997	0	394	99	1451	542	947	626	791	533	560	636	88	0	2136	113	428	1147	573	893	128	1269	1329	597	403	1772	795	220	438	686	843	591	475	0	0	913	1978	1495	227	473	764	380	232
c6e6805538ad063e4a9171e068777b51	bASV135	d__Bacteria; p__Actinobacteriota; c__Thermoleophilia; o__Solirubrobacterales; f__67-14; g__67-14	GTAGTCCACGCCGTAAACGATGGGTACTAGGTGTGGGAGGTGTCGACTCCTCCCGTGCCGTCGCTAACGCACTAAGTACCCCGCCTGGGGAGTACGGCCGCAAGGCTAAAACTCAAAGGAATTGACGGGGGCCCGCACAAGCAGCGGAGCATGTGGTTTAATTCGACGCAACGCGAAGAACCTTACCTGGGCTTGACATGTTGGTGACCGCCGTGGAAACACGGTTTTCCTTCGGGACACCATCACAGGTGGTGCATGGCTGTCGTCAGCTCGTGTCGTGAGATGTTGGGTTAAGTCCCGCAACGA	182	0	229	464	828	233	192	496	367	586	269	205	325	112	158	0	1598	744	158	1050	586	667	788	61	514	0	126	72	462	271	113	206	183	153	189	0	93	49	0	0	0	1862	1700	1403	159	36
3cb024799035c23e235b44b3e9630435	bASV136	d__Bacteria; p__Actinobacteriota; c__Thermoleophilia; o__Solirubrobacterales; f__Solirubrobacteraceae; g__Conexibacter	GTAGTCCACGCTGTAAACGATGGGCACTAGGTGTGGGGGGTGTCGACTCCCTCCGTGCCGACGCTAACGCATTAAGTGCCCCGCCTGGGGAGTACGGCCGCAAGGCTAAAACTCAAAGGAATTGACGGGGGCCCGCACAAGCAGCGGAGCATGTGGTTTAATTCGACGCAACGCGAAGAACCTTACCTGGGCTTGACATGTTCCTGACAGCCGTGGAAACACGGTCTCCCTTCGGGGCAGGATCACAGGTGGTGCATGGCTGTCGTCAGCTCGTGTCGTGAGATGTTGGGTTAAGTCCCGCAACGA	0	0	0	83	1473	243	89	0	0	0	0	0	86	0	0	0	0	0	110	0	0	161	1192	316	0	0	0	0	0	0	43	0	0	0	0	284	115	0	0	0	0	0	0	0	0	0
6c7a9dbf29a337d0a9f16ac8abdfd50a	bASV137	d__Bacteria; p__Actinobacteriota; c__Actinobacteria; o__Propionibacteriales; f__Nocardioidaceae; g__Nocardioides	GTAGTCCACACCGTAAACGTTGGGCGCTAGGTGTGGGATCCATTCCACGGGTTCCGTGCCGCAGCTAACGCATTAAGCGCCCCGCCTGGGGAGTACGGCCGCAAGGCTAAAACTCAAAGGAATTGACGGGGGCCCGCACAAGCGGCGGAGCATGCGGATTAATTCGATGCAACGCGAAGAACCTTACCTGGGTTTGACATACGCCGGAAAGCATCAGAGATGGTGCCCCTTTTTGTCGGTGTACAGGTGGTGCATGGCTGTCGTCAGCTCGTGTCGTGAGATGTTGGGTTAAGTCCCGCAACGAGC	1464	468	0	284	2102	202	0	346	134	485	544	397	115	473	536	0	0	822	0	185	257	200	0	0	208	652	0	0	0	0	308	508	286	311	559	0	0	0	858	1773	2018	944	1634	2353	275	234
d58b7950e16ab7f5021e454f001c538f	bASV138	d__Bacteria; p__Actinobacteriota; c__Actinobacteria; o__Corynebacteriales; f__Mycobacteriaceae; g__Mycobacterium	GTAGTCCACGCCGTAAACGGTGGGTACTAGGTGTGGGTTTCCTTCCTTGGGATCCGTGCCGTAGCTAACGCATTAAGTACCCCGCCTGGGGAGTACGGCCGCAAGGCTAAAACTCAAAGAAATTGACGGGGGCCCGCACAAGCGGCGGAGCATGTGGATTAATTCGATGCAACGCGAAGAACCTTACCTGGGTTTGACATGCACAGGACGCTGGTAGAGATATCAGTTCCCTTGTGGCCTGTGTGCAGGTGGTGCATGGCTGTCGTCAGCTCGTGTCGTGAGATGTTGGGTTAAGTCCCGCAACGA	708	244	245	411	1399	272	166	809	224	469	241	182	357	329	281	0	10808	951	214	284	358	308	161	119	237	937	0	66	320	0	117	184	266	258	429	226	67	0	159	426	444	267	276	454	161	148
dcda8a4cce949599c33383ef80063872	bASV139	d__Bacteria; p__Actinobacteriota; c__Thermoleophilia; o__Solirubrobacterales; f__67-14; g__67-14	GTAGTCCACGCCGTAAACGATGGGCACTAGGTGTGGGAGGTGTCGACTCCTCCCGTGCCGTCGCTAACGCACTAAGTGCCCCGCCTGGGGAGTACGGCCGCAAGGCTAAAACTCAAAGGAATTGACGGGGGCCCGCACAAGCAGCGGAGCATGTGGTTTAATTCGACGCAACGCGAAGAACCTTACCTGGGCTTGACATGTTGGTGACCGCCGTGGAAACACGGTTTTCCTTCGGGACACCATCACAGGTGGTGCATGGCTGTCGTCAGCTCGTGTCGTGAGATGTTGGGTTAAGTCCCGCAACGA	184	0	113	708	1497	673	347	2317	636	779	609	0	556	240	325	0	2626	2018	614	477	1103	1616	360	75	870	1178	263	230	1171	0	92	129	982	549	0	852	0	0	89	183	218	205	200	485	82	117
48a885bce11f35ad94e92963112fc356	bASV140	d__Bacteria; p__Proteobacteria; c__Alphaproteobacteria; o__Rhizobiales; f__Rhizobiaceae; g__Allorhizobium-Neorhizobium-Pararhizobium-Rhizobium	GTAGTCCACGCCGTAAACGATGAATGTTAGCCGTCGGGCAGTATACTGTTCGGTGGCGCAGCTAACGCATTAAACATTCCGCCTGGGGAGTACGGTCGCAAGATTAAAACTCAAAGGAATTGACGGGGGCCCGCACAAGCGGTGGAGCATGTGGTTTAATTCGAAGCAACGCGCAGAACCTTACCAGCCCTTGACATGCCCGGCTACCTGCAGAGATGCAGGGTTCCCTTCGGGGACCGGGACACAGGTGCTGCATGGCTGTCGTCAGCTCGTGTCGTGAGATGTTGGGTTAAGTCCCGCAACGAG	115	95	171	0	0	120	0	51	0	154	0	171	225	0	0	0	0	0	0	0	0	0	147	0	0	0	148	102	964	202	204	94	0	0	140	0	852	121	0	0	0	2179	2871	2849	194	154
86ab1ca07e39e24453fe8ab2af8e5b14	bASV141	d__Bacteria; p__Actinobacteriota; c__Actinobacteria; o__Micrococcales; f__Micrococcaceae	GTAGTCCATGCCGTAAACGTTGGGCACTAGGTGTGGGGGACATTCCACGTTTTCCGCGCCGTAGCTAACGCATTAAGTGCCCCGCCTGGGGAGTACGGCCGCAAGGCTAAAACTCAAAGGAATTGACGGGGGCCCGCACAAGCGGCGGAGCATGCGGATTAATTCGATGCAACGCGAAGAACCTTACCAAGGCTTGACATGAACCGGAAAGACCTGGAAACAGGTGCCCCGCTTGCGGTCGGTTTACAGGTGGTGCATGGTTGTCGTCAGCTCGTGTCGTGAGATGTTGGGTTAAGTCCCGCAACG	1631	0	1631	95	0	296	50	297	108	132	0	761	0	115	83	0	0	1704	56	150	221	331	83	172	257	950	22	49	110	0	12	43	712	1223	157	150	215	18	0	0	0	26	0	36	578	0
800d2ba263bf2279bdbc5f7134ef300c	bASV142	d__Bacteria; p__Acidobacteriota; c__Acidobacteriae; o__Acidobacteriales; f__uncultured; g__uncultured	GTAGTCCTAGCCCTAAACGATGATTGCTTGGTGTAGCAGGTACCCAATCCTGCTGTGCCGCAGCTAACGCGATAAGCAATCCGCCTGGGGAGTACGGTCGCAAGGCTGAAACTCAAAGGAATTGACGGGGGCCCGCACAAGCGGTGGAGCATGTGGTTCAATTCGACGCAACGCGAAGAACCTTACCTGGGCTCGAAATGCAGGAGACCGGGGTGGAAACATCCCTTCCCCTTAAAAGGCTGCTGCATAGGTGCTGCATGGCTGTCGTCAGCTCGTGTCGTGAGATGTTGGGTTAAGTCCCGCAAC	0	0	13	0	1270	290	135	0	0	0	0	0	630	0	0	0	0	24	0	0	0	0	862	1888	0	0	0	12	7	0	178	0	0	0	0	0	140	149	0	0	0	0	0	0	0	0
1740d3131cb11110be9c0438aaec924a	bASV143	d__Bacteria; p__Bacteroidota; c__Bacteroidia; o__Chitinophagales; f__Chitinophagaceae; g__Terrimonas	GTAGTCCACGCCCTAAACTATGGATACTCGACATTTGCGATAAACTGCAAGTGTCTGAGCGAAAGCATTAAGTATCCCACCTGGGAAGTACGATCGCAAGATTGAAACTCAAAGGAATTGGCGGGGGTCCGCACAAGCGGTGGAGCATGTGGTTTAATTCGATGATACGCGAGGAACCTTACCTGGGCTAGAATGCTGGGAGACCGTGGGTGAAAGCTCACTTTGTAGCAATACACTGCCAGTAAGGTGCTGCATGGCTGTCGTCAGCTCGTGCCGTGAGGTGTTGGGTTAAGTCCCGCAACGAGC	127	52	0	0	0	0	0	0	0	0	154	83	109	492	1596	0	0	65	0	0	0	63	4906	32	163	0	533	110	1821	2757	204	571	0	0	1356	1401	34	0	76	998	91	88	120	198	59	1134
d5a84d5134f1305919edcfdbb9c9ddde	bASV144	d__Bacteria; p__Actinobacteriota; c__Actinobacteria; o__Micrococcales; f__Microbacteriaceae; g__Microbacterium	GTAGTCCACCCCGTAAACGTTGGGAACTAGTTGTGGGGTCCTTTCCACGGATTCCGTGACGCAGCTAACGCATTAAGTTCCCCGCCTGGGGAGTACGGCCGCAAGGCTAAAACTCAAAGGAATTGACGGGGACCCGCACAAGCGGCGGAGCATGCGGATTAATTCGATGCAACGCGAAGAACCTTACCAAGGCTTGACATACACGAGAACACCCTAGAAATAGGGGACTCTTTGGACACTCGTGAACAGGTGGTGCATGGTTGTCGTCAGCTCGTGTCGTGAGATGTTGGGTTAAGTCCCGCAACG	1910	1649	853	60	235	278	38	113	22	186	87	918	113	236	294	0	193	131	32	148	141	308	243	47	295	0	154	165	221	242	89	129	174	67	284	320	42	0	331	783	473	328	368	402	569	121
f8ab00bbd0561ea4ace34f65370d7b8f	bASV147	d__Bacteria; p__Proteobacteria; c__Alphaproteobacteria; o__Rhizobiales; f__Xanthobacteraceae	GTAGTCCACGCTGTAAACGATGGATGCTAGCCGTTGGCGAGCTTGCTCGTCAGTGGCGCAGCTAACGCTTTAAGCATCCCGCCTGGGGAGTACGGTCGCAAGATTAAAACTCAAAGGAATTGACGGGGGCCCGCACAAGCGGTGGAGCATGTGGTTCAATTCGAAGCAACGCGCAGAACCTTACCAGCCCTTGACATCCCGGTCGCGGAGACCAGAGACGGTTTCCTTCAGTTCGGCTGGACCGGAGACAGGTGCTGCATGGCTGTCGTCAGCTCGTGTCGTGAGATGTTGGGTTAAGTCCCGCAA	0	0	57	6237	0	1421	373	9581	3388	1289	932	0	1196	338	316	0	2046	11158	559	2348	1536	732	0	0	1383	957	0	0	106	0	0	0	1538	2098	0	0	0	0	0	0	0	0	0	0	1412	583
a5e60a724e6619edb2168323c10c7bda	bASV148	d__Bacteria; p__Proteobacteria; c__Alphaproteobacteria; o__Sphingomonadales; f__Sphingomonadaceae; g__Sphingobium	GTAGTCCACGCCGTAAACGATGATAACTAGCTGCTGGGGTGCATGGCATTTCAGTGGCGCAGCTAACGCATTAAGTTATCCGCCTGGGGAGTACGGTCGCAAGATTAAAACTCAAAGGAATTGACGGGGGCCTGCACAAGCGGTGGAGCATGTGGTTTAATTCGAAGCAACGCGCAGAACCTTACCAACGTTTGACATCCCTATCGCGGATCGTGGAGACACTTTCCTTCAGTTCGGCTGGATAGGTGACAGGTGCTGCATGGCTGTCGTCAGCTCGTGTCGTGAGATGTTGGGTTAAGTCCCGCA	589	0	633	96	0	0	0	307	43	310	0	507	69	47	276	0	0	2256	0	0	27	765	262	0	84	0	140	155	271	0	40	24	580	425	900	0	191	23	0	0	0	12	0	35	0	37
0a4b9ccfddd6ecaa0d8d8b692d6722a2	bASV149	d__Bacteria; p__Proteobacteria; c__Alphaproteobacteria; o__Rhizobiales; f__Xanthobacteraceae; g__Rhodoplanes	GTAGTCCACGCCGTAAACGATGGATGCTAGCCGTTGGCGGGTTTACTCGTCAGTGGCGCAGCTAACGCATTAAGCATCCCGCCTGGGGAGTACGGTCGCAAGATTAAAACTCAAAGGAATTGACGGGGGCCCGCACAAGCGGTGGAGCATGTGGTTCAATTCGAAGCAACGCGCAGAACCTTACCAGCCCTTGACATGCCACGACGGTTTCCAGAGATGGATTCCTCCCCGCAAGGGGCGTGGACACAGGTGCTGCATGGCTGTCGTCAGCTCGTGTCGTGAGATGTTGGGTTAAGTCCCGCAACG	0	0	0	7839	1799	3277	794	8913	5067	1207	271	0	2082	304	0	0	4154	5726	1350	1743	3669	2370	75	0	3053	3675	0	0	200	0	121	74	843	1235	0	0	34	0	0	0	0	0	0	0	886	357
993744debedd9b0e4b6328284d64d285	bASV150	d__Bacteria; p__Proteobacteria; c__Alphaproteobacteria; o__Rhizobiales; f__Rhizobiaceae; g__Mesorhizobium; s__Mesorhizobium_plurifarium	GTAGTCCACGCCGTAAACGATGGAAGCTAGCCGTTGGCAAGTTTACTTGTCGGTGGCGCAGCTAACGCATTAAGCTTCCCGCCTGGGGAGTACGGTCGCAAGATTAAAACTCAAAGGAATTGACGGGGGCCCGCACAAGCGGTGGAGCATGTGGTTTAATTCGAAGCAACGCGCAGAACCTTACCAGCCCTTGACATCCCGGTCGCGGTTACCAGAAATGGTTTCCTTCAGTTCGGCTGGACCGGTGACAGGTGCTGCATGGCTGTCGTCAGCTCGTGTCGTGAGATGTTGGGTTAAGTCCCGCAA	31	0	0	0	372	0	0	0	0	0	0	0	27	0	0	0	0	0	0	0	0	0	1661	1068	0	0	78	41	608	0	85	62	0	0	171	221	5290	2307	0	0	71	768	382	476	0	0
48e6ba4b2069ece2203d837c8b7ec851	bASV151	d__Bacteria; p__Proteobacteria; c__Alphaproteobacteria; o__Rhizobiales; f__Xanthobacteraceae; g__uncultured; s__uncultured_forest	GTAGTCCACGCCGTAAACGATGGATGCTAGCCGTTGTCGGGTTTACTCGTCAGTGGCGCAGCTAACGCATTAAGCATCCCGCCTGGGGAGTACGGTCGCAAGATTAAAACTCAAAGGAATTGACGGGGGCCCGCACAAGCGGTGGAGCATGTGGTTCAATTCGAAGCAACGCGCAGAACCTTACCAGCCCTTGACATGTCCCGTATGAGTACCAGAGATGGAACTCTTCAGTTCGGCTGGCGGGAACACAGGTGCTGCATGGCTGTCGTCAGCTCGTGTCGTGAGATGTTGGGTTAAGTCCCGCAA	0	0	0	285	994	886	282	217	122	93	0	0	1121	125	0	0	1125	657	357	187	0	500	739	1150	0	0	224	165	629	0	202	33	196	0	0	536	136	107	0	0	0	95	92	136	0	115
ab5963cdc2547234808c6615de5ae182	bASV152	d__Bacteria; p__Proteobacteria; c__Gammaproteobacteria; o__Enterobacterales; f__Enterobacteriaceae; g__Klebsiella	GTAGTCCACGCCGTAAACGATGTCGATTTGGAGGTTGTGCCCTTGAGGCGTGGCTTCCGGAGCTAACGCGTTAAATCGACCGCCTGGGGAGTACGGCCGCAAGGTTAAAACTCAAATGAATTGACGGGGGCCCGCACAAGCGGTGGAGCATGTGGTTTAATTCGATGCAACGCGAAGAACCTTACCTGGTCTTGACATCCACAGAACTTTCCAGAGATGGATTGGTGCCTTCGGGAACTGTGAGACAGGTGCTGCATGGCTGTCGTCAGCTCGTGTTGTGAAATGTTGGGTTAAGTCCCGCAACGA	0	0	1002	46	0	0	0	0	0	0	0	0	0	0	0	0	0	0	0	0	0	0	0	0	0	0	0	0	0	0	0	0	0	0	0	0	0	0	0	0	0	0	0	0	0	0
d2f5ecb25cfdf6929063923cddf34464	bASV153	d__Bacteria; p__Proteobacteria; c__Alphaproteobacteria; o__Sphingomonadales; f__Sphingomonadaceae; g__Novosphingobium	GTAGTCCACGCCGTAAACGATGATAACTAGCTGTCCGGGCACATGGTGTTTGGGTGGCGCAGCTAACGCATTAAGTTATCCGCCTGGGGAGTACGGTCGCAAGATTAAAACTCAAAGGAATTGACGGGGGCCTGCACAAGCGGTGGAGCATGTGGTTTAATTCGAAGCAACGCGCAGAACCTTACCAGCGTTTGACATCCCGCGCTATTACCAGAGATGGTAAGTTCCCTTCGGGGACGCGGTGACAGGTGCTGCATGGCTGTCGTCAGCTCGTGTCGTGAGATGTTGGGTTAAGTCCCGCAACGA	42	135	0	0	0	41	0	178	0	0	0	0	196	47	0	0	0	45	42	27	26	47	824	0	1748	0	82	0	92	0	0	207	132	0	0	0	98	1720	0	336	1359	243	324	13	118	60
89c7831cbab739c2c6c805f95cde2bee	bASV154	d__Bacteria; p__Proteobacteria; c__Alphaproteobacteria; o__Rhizobiales; f__Xanthobacteraceae; g__Rhodoplanes	GTAGTCCACGCCGTAAACGATGGATGCTAGCCGTTGGCGGGTTTACTCGTCAGTGGCGCAGCTAACGCATTAAGCATCCCGCCTGGGGAGTACGGTCGCAAGATTAAAACTCAAAGGAATTGACGGGGGCCCGCACAAGCGGTGGAGCATGTGGTTCAATTCGAAGCAACGCGCAGAACCTTACCAGCCCTTGACATGTCCCGTATGGGTTTCAGAGATGAGACCCTTCAGTTCGGCTGGCGGGAACACAGGTGCTGCATGGCTGTCGTCAGCTCGTGTCGTGAGATGTTGGGTTAAGTCCCGCAA	323	78	166	729	0	490	385	656	464	239	378	69	627	287	401	0	0	1115	257	321	453	617	827	391	544	0	221	209	1033	0	228	299	393	660	501	873	370	150	162	307	172	118	214	251	278	319
e4baab4791f7f5304377084f88483a2b	bASV155	d__Bacteria; p__Proteobacteria; c__Gammaproteobacteria; o__Enterobacterales	GTAGTCCACGCCGTAAACGATGTCGACTTGGAGGTTGTGCCCTTGAGGCGTGGCTTCCGGAGCTAACGCGTTAAGTCGACCGCCTGGGGAGTACGGCCGCAAGGTTAAAACTCAAATGAATTGACGGGGGCCCGCACAAGCGGTGGAGCATGTGGTTTAATTCGATGCAACGCGAAGAACCTTACCTACTCTTGACATCCACGGAATTTAGCAGAGATGCTTTAGTGCCTTCGGGAACCGTGAGACAGGTGCTGCATGGCTGTCGTCAGCTCGTGTTGTGAAATGTTGGGTTAAGTCCCGCAACGA	156	465	1020	0	303	0	0	0	0	0	0	317	0	0	62	0	0	0	0	0	86	0	38	0	0	149	0	145	0	0	0	41	0	0	0	0	0	0	0	0	0	0	0	0	87	0
304cb787732db7709ee134288b948136	bASV156	d__Bacteria; p__Proteobacteria; c__Alphaproteobacteria; o__Rhizobiales; f__Xanthobacteraceae; g__Rhodoplanes; s__uncultured_Alphaproteobacteria	GTAGTCCACGCCGTAAACGATGGATGCTAGCCGTTGGCGGGTTTACCCGTCAGTGGCGCAGCTAACGCATTAAGCATCCCGCCTGGGGAGTACGGTCGCAAGATTAAAACTCAAAGGAATTGACGGGGGCCCGCACAAGCGGTGGAGCATGTGGTTCAATTCGAAGCAACGCGCAGAACCTTACCAGCCCTTGACATGTCCCGTATGGGTTTCAGAAATGAGACCCTTCAGTTCGGCTGGCGGGAACACAGGTGCTGCATGGCTGTCGTCAGCTCGTGTCGTGAGATGTTGGGTTAAGTCCCGCAA	647	306	579	181	667	724	178	324	111	212	430	224	889	196	779	0	1573	1237	555	151	201	575	404	35	273	0	63	83	701	1078	164	291	356	216	425	507	43	0	246	825	392	165	211	367	76	278
b59b161e952051b11d2c9352b428c83f	bASV157	d__Bacteria; p__Proteobacteria; c__Alphaproteobacteria; o__Dongiales; f__Dongiaceae; g__Dongia	GTAGTCCACGCCGTAAACGATGAATGCTAGACGTTGGCGAGCATGCTCGTCAGTGTCGGAGCTAACGCATTAAGCATTCCGCCTGGGGAGTACGGTCGCAAGATTAAAACTCAAAGGAATTGACGGGGGCCCGCACAAGCGGTGGAGCATGTGGTTTAATTCGAAGCAACGCGCAGAACCTTACCAACCCTTGACATGGGGAGTATGGGCTGGAGAGATCTGGTCCTTCAGTTCGGCTGGCTCCCACACAGGTGCTGCATGGCTGTCGTCAGCTCGTGTCGTGAGATGTTGGGTTAAGTCCCGCAA	443	137	222	70	1054	227	0	108	0	0	109	314	152	0	152	0	0	220	31	0	0	0	158	160	60	0	273	145	752	979	345	533	129	119	566	1103	117	39	1317	3596	1569	190	463	569	815	86
217e905a60e18f915c4a0880c3d88058	bASV158	d__Bacteria; p__Proteobacteria; c__Gammaproteobacteria; o__Gammaproteobacteria_Incertae_Sedis; f__Unknown_Family; g__Acidibacter	GTAGTCCACGCCATAAACGATGAGAACTAGACGTTGAAGGGGTAAGCCCTCCAGTGTCGTAGCTAACGCGCTAAGTTCTCCGCCTGGGGAGTACGGCCGCAAGGTTGAAACTCAAAGGAATTGACGGGGACCCGCACAAGCGGTGGAGCATGTGGTTTAATTCGATGCAACGCGAAGAACCTTACCTGGTCTTGACATCCTGGGAATCCTGTAGAGATATGGGAGTGCCGCAAGGAACCCAGAGACAGGTGCTGCATGGCTGTCGTCAGCTCGTGTCGTGAGATGTTGGGTTAAGTCCCGCAACGA	0	0	0	376	1845	128	222	812	218	100	0	0	187	0	0	0	0	205	160	473	105	241	1183	424	113	438	59	59	97	0	151	0	106	52	0	472	2316	1139	0	0	0	0	0	54	0	45
4efd26bc149aee8bde1c63cb8c60fc17	bASV159	d__Bacteria; p__Proteobacteria; c__Gammaproteobacteria; o__Burkholderiales; f__Comamonadaceae	GTAGTCCACGCCCTAAACGATGTCAACTGGTTGTTGGGTCTTAACTGACTCAGTAACGAAGCTAACGCGTGAAGTTGACCGCCTGGGGAGTACGGCCGCAAGGTTGAAACTCAAAGGAATTGACGGGGACCCGCACAAGCGGTGGATGATGTGGTTTAATTCGATGCAACGCGAAAAACCTTACCCACCTTTGACATGTACGGAATCCTTTAGAGATAGAGGAGTGCTCGAAAGAGAGCCGTAACACAGGTGCTGCATGGCTGTCGTCAGCTCGTGTCGTGAGATGTTGGGTTAAGTCCCGCAACG	168	0	474	0	389	88	0	0	0	0	0	0	0	0	0	0	0	0	0	155	0	0	0	0	0	0	0	86	0	0	0	0	0	0	0	0	0	0	0	0	0	0	0	0	0	54
dda4c062d62ff51096f9bd2230cb26eb	bASV160	d__Bacteria; p__Actinobacteriota; c__Actinobacteria; o__Streptomycetales; f__Streptomycetaceae; g__Streptomyces	GTAGTCCACGCCGTAAACGTTGGGAACTAGGTGTTGGCGACATTCCACGTCGTCGGTGCCGCAGCTAACGCATTAAGTTCCCCGCCTGGGGAGTACGGCCGCAAGGCTAAAACTCAAAGGAATTGACGGGGGCCCGCACAAGCAGCGGAGCATGTGGCTTAATTCGACGCAACGCGAAGAACCTTACCAAGGCTTGACATATACCGGAAAGCATTAGAGATAGTGCCCCCCTTGTGGTCGGTATACAGGTGGTGCATGGCTGTCGTCAGCTCGTGTCGTGAGATGTTGGGTTAAGTCCCGCAACGA	2924	462	2033	277	0	417	240	401	235	743	191	772	177	180	207	0	0	525	0	326	668	624	263	46	769	625	73	164	268	420	86	77	257	318	0	0	475	127	0	235	198	62	80	115	3531	176
31766c4189cc7571b4d3bcc81d2b7a4c	bASV161	d__Bacteria; p__Proteobacteria; c__Gammaproteobacteria; o__CCD24; f__CCD24; g__CCD24	GTAGTCCACGCCGTAAACGATGAGAACTAGATGTCGGGGGGGATTAGCCCCTCGGTGTCGTAGCTAACGCGCTAAGTTCTCCGCCTGGGGAGTACGGCCGCAAGGTTGAAACTCAAAGGAATTGACGGGGACCCGCACAAGCGGTGGAGCATGTGGTTTAATTCGATGCAACGCGAAGAACCTTACCTGGTCTTGACATCCTCGGAACCCTGCAGCGATGCGGGGGTGCCTTCGGGAGCCGAGAGACAGGTGCTGCATGGCTGTCGTCAGCTCGTGTCGTGAGATGTTGGGTTAAGTCCCGCAACG	753	257	432	582	755	267	181	405	173	188	255	244	416	359	161	0	427	295	190	320	607	360	440	95	362	0	307	175	629	743	362	751	0	141	468	366	37	0	515	1750	1275	232	283	862	967	121
826d701b519aed5baa3c5fb1f323320c	bASV162	d__Bacteria; p__Proteobacteria; c__Gammaproteobacteria; o__Pseudomonadales; f__Pseudomonadaceae; g__Pseudomonas; s__Pseudomonas_nitroreducens	GTAGTCCACGCCGTAAACGATGTCGACTAGCCGTTGGGATCCTTGAGATCTTAGTGGCGCAGCTAACGCGATAAGTCGACCGCCTGGGGAGTACGGCCGCAAGGTTAAAACTCAAATGAATTGACGGGGGCCCGCACAAGCGGTGGAGCATGTGGTTTAATTCGAAGCAACGCGAAGAACCTTACCTGGCCTTGACATGTCCGGAACCTTGCAGAGATGCGAGGGTGCCTTCGGGAATCGGAACACAGGTGCTGCATGGCTGTCGTCAGCTCGTGTCGTGAGATGTTGGGTTAAGTCCCGTAACGA	233	104	137	0	0	48	0	0	0	0	0	80	124	0	117	0	0	23	0	43	0	0	116	0	0	0	48	63	95	0	0	0	0	0	0	0	371	0	0	0	0	27	68	0	472	0
43a6eb31904f15cc66133f3ae3d0df8a	bASV163	d__Bacteria; p__Proteobacteria; c__Alphaproteobacteria; o__Rhizobiales; f__Rhizobiaceae; g__Ensifer	GTAGTCCACGCCGTAAACGATGAATGTTAGCCGTCGGGCAGTTTACTGTTCGGTGGCGCAGCTAACGCATTAAACATTCCGCCTGGGGAGTACGGTCGCAAGATTAAAACTCAAAGGAATTGACGGGGGCCCGCACAAGCGGTGGAGCATGTGGTTTAATTCGAAGCAACGCGCAGAACCTTACCAGCCCTTGACATCCCGATCGCGGATTACAGAGATGTTTTCCTTCAGTTCGGCTGGATCGGAGACAGGTGCTGCATGGCTGTCGTCAGCTCGTGTCGTGAGATGTTGGGTTAAGTCCCGCAA	1408	1734	2237	118	0	263	0	189	66	159	180	1831	93	243	448	0	0	143	0	89	147	145	0	97	182	0	0	0	111	0	202	236	0	0	3490	0	0	0	87	192	99	0	121	54	666	136
ba51bec29a58630d7d1069ea4cc8bf3f	bASV164	d__Bacteria; p__Proteobacteria; c__Alphaproteobacteria; o__Dongiales; f__Dongiaceae; g__Dongia	GTAGTCCACGCCGTAAACGATGAATGCTAGACGTTGGCGAGCATGCTCGTCAGTGTCGGAGCTAACGCATTAAGCATTCCGCCTGGGGAGTACGGTCGCAAGATTAAAACTCAAAGGAATTGACGGGGGCCCGCACAAGCGGTGGAGCATGTGGTTTAATTCGAAGCAACGCGCAGAACCTTACCAACCCTTGACATGGGACGTATGGGCTTCAGAGATGGGGTCCTTCAGTTCGGCTGGCGTCCACACAGGTGCTGCATGGCTGTCGTCAGCTCGTGTCGTGAGATGTTGGGTTAAGTCCCGCAA	253	94	245	1346	0	469	256	1897	962	991	810	267	621	144	581	0	1012	930	252	394	1569	1342	0	0	1374	2090	73	74	528	0	218	286	507	468	432	0	0	0	491	1859	861	124	297	484	2514	448
85dca0308c9d6b58716a94a843d08f38	bASV165	d__Bacteria; p__Actinobacteriota; c__Actinobacteria; o__Micrococcales; f__Microbacteriaceae; g__Microbacterium	GTAGTCCACCCCGTAAACGTTGGGAACTAGTTGTGGGGTCCATTCCACGGATTCCGTGACGCAGCTAACGCATTAAGTTCCCCGCCTGGGGAGTACGGCCGCAAGGCTAAAACTCAAAGGAATTGACGGGGACCCGCACAAGCGGCGGAGCATGCGGATTAATTCGATGCAACGCGAAGAACCTTACCAAGGCTTGACATATACGAGAACGGGCCAGAAATGGTCAACTCTTTGGACACTCGTAAACAGGTGGTGCATGGTTGTCGTCAGCTCGTGTCGTGAGATGTTGGGTTAAGTCCCGCAACG	693	986	303	127	235	274	50	149	93	50	89	1249	91	266	414	0	423	111	0	189	71	389	253	225	141	0	153	140	344	275	87	95	306	85	254	275	67	31	87	214	177	169	253	372	95	108
824150e31f3ee7a2719496173bdac315	bASV166	d__Bacteria; p__Myxococcota; c__Polyangia; o__Polyangiales; f__Polyangiaceae	GTAGTCCACGCCGTAAACGATGGGTGCTAGGTGTCGCGGGCTTTGACCCCTGCGGTGCCGTAGCTAACGCATTAAGCACCCCGCCTGGGGAGTACGGCCGCAAGGCTAAAACTCAAAGGAATTGACGGGGGCCCGCACAAGCGGTGGAGCATGTGGTTCAATTCGACGCAACGCGCAGAACCTTACCTGGGCTAGAAAATGCAGGAACCTGGTTGAAAAATCGGGGTGCTCTTCGGAGAACCTGTAGTTAGGTGCTGCATGGCTGTCGTCAGCTCGTGTCGTGAGATGTTGGGTTAAGTCCCGCAA	179	0	229	768	1473	609	354	699	451	363	380	0	592	487	286	0	0	608	588	350	589	700	527	182	598	1050	179	175	285	859	329	170	343	410	163	575	210	156	209	267	151	293	167	236	242	195
f4f83c52b5e521cbf5064855d80cac01	bASV167	d__Bacteria; p__Actinobacteriota; c__Actinobacteria; o__Micrococcales; f__Micrococcaceae; g__Arthrobacter	GTAGTCCATGCCGTAAACGTTGGGCACTAGGTGTGGGGGACATTCCACGTTTTCCGCGCCGTAGCTAACGCATTAAGTGCCCCGCCTGGGGAGTACGGCCGCAAGGCTAAAACTCAAAGGAATTGACGGGGGCCCGCACAAGCGGCGGAGCATGCGGATTAATTCGATGCAACGCGAAGAACCTTACCAAGGCTTGACATGGGCCGGACCGGGCTGGAAACAGTCCTTCCCCTTTGGGGCCGGTTCACAGGTGGTGCATGGTTGTCGTCAGCTCGTGTCGTGAGATGTTGGGTTAAGTCCCGCAAC	0	0	0	769	0	1108	360	1865	454	1114	622	0	842	399	465	0	0	1284	213	498	432	3846	0	0	634	3549	0	0	0	0	0	0	707	859	0	0	0	0	0	0	0	0	0	0	91	339
f0d8f34dd827a910bb5d7c17a41ba420	bASV168	d__Bacteria; p__Proteobacteria; c__Alphaproteobacteria; o__Rhizobiales; f__Xanthobacteraceae; g__uncultured	GTAGTCCACGCCGTAAACGATGGATGCTAGCCGTTGGCGAGCTTGCTCGTCAGTGGCGCAGCTAACGCATTAAGCATCCCGCCTGGGGAGTACGGTCGCAAGATTAAAACTCAAAGGAATTGACGGGGGCCCGCACAAGCGGTGGAGCATGTGGTTCAATTCGAAGCAACGCGAAGAACCTTACCAGCTTTTGACATGTCCCGTATGAGCAACAGAAATGTAGCTCTTCAGTTCGGCTGGCGGGAACACAGGTGCTGCATGGCTGTCGTCAGCTCGTGTCGTGAGATGTTGGGTTAAGTCCCGCAA	31	52	402	364	2245	1137	62	700	207	294	192	44	1574	467	393	0	0	3344	85	91	187	455	1515	111	172	0	669	429	4017	377	248	190	567	561	409	868	9	13	166	375	311	462	554	1071	146	822
f3902353733114e9bb8e4471593a538f	bASV169	d__Bacteria; p__Firmicutes; c__Bacilli; o__Bacillales; f__Bacillaceae; g__Bacillus	GTAGTCCACGCCGTAAACGATGAGTGCTAAGTGTTAGAGGGTTTCCGCCCTTTAGTGCTGAAGTTAACGCATTAAGCACTCCGCCTGGGGAGTACGGTCGCAAGACTGAAACTCAAAGGAATTGACGGGGGCCCGCACAAGCGGTGGAGCATGTGGTTTAATTCGAAGCAACGCGAAGAACCTTACCAGGTCTTGACATCCTCTGACAACCCTAGAGATAGGGCTTTCCCTTCGGGGACAGAGTGACAGGTGGTGCATGGTTGTCGTCAGCTCGTGTCGTGAGATGTTGGGTTAAGTCCCGCAACG	10011	95	9895	576	0	170	407	502	1415	69	171	2218	656	142	0	0	0	961	283	763	589	7198	0	0	1398	720	0	0	0	0	0	0	214	252	0	0	0	0	0	0	0	0	0	0	306	521
69a30821120e64a76c4b7d054ceaf6b0	bASV170	d__Bacteria; p__Actinobacteriota; c__MB-A2-108; o__MB-A2-108; f__MB-A2-108; g__MB-A2-108	GTAGTCCTAGCCGTAAACGTTGGGTGCTAGGTGTGGGCGGTCATCAACCCCGTCCGTGCCGAAGCTAACGCATTAAGCACCCCGCCTGGGGAGTACGGCCGCAAGGCTAAAACTCAAAGGAATTGACGGGGCCCCGCACAAGCGGCGGAGCATGTTGCTTAATTCGATGCGACGCGAAGAACCTTACCTGGGCTTGACATGCAGGGTGAAACCCGTGAAAGCGGGCGCTCTTCGGAGCCTGCACAGGTGGTGCATGGCTGTCGTCAGCTCGTGCCGTGAGGTGTTGCCTTAAGTGGCGCAACGAGC	233	0	137	263	1907	1000	357	390	168	193	107	44	1344	478	237	0	0	2310	432	96	267	1095	2115	330	311	699	278	261	887	736	248	231	523	784	170	592	19	0	146	269	281	313	545	738	0	465
11b2c3c5e81b17e9e5a41d03f331c3cb	bASV171	d__Bacteria; p__Gemmatimonadota; c__Gemmatimonadetes; o__Gemmatimonadales; f__Gemmatimonadaceae; g__uncultured	GTAGTCCACGCCGTAAACGATGGGCACTAGGCGTCGGGGGGAGCGACCCTCCCGGTGCCGTCGCTAACGCAGTAAGTGCCCCGCCTGGGGAGTACGGCCGCAAGGCTGAAACTCAAAGGAATTGACGGGGGCCCGCACAAGCGGTGGAGCATGTGGTTTAATTCGAAGCAACGCGAAGAACCTTACCTGGGCTTGACATGCACGGGAAAGCCGGTGGAAACATCGGCCCCTCTTCGGAGTCCGTGCACAGGTGCTGCATGGCTGTCGTCAGCTCGTGTCGTGAGATGTTGGGTTAAGTCCCGCAAC	229	0	268	634	0	479	217	1146	574	352	305	168	393	284	284	0	944	2083	209	528	878	288	608	73	743	866	99	90	531	710	275	496	527	530	195	0	130	67	593	1164	1324	410	608	813	511	327
f0e82b246d195adaed056197f7b65f9c	bASV172	d__Bacteria; p__Proteobacteria; c__Alphaproteobacteria; o__Rhizobiales; f__Rhizobiaceae; g__Allorhizobium-Neorhizobium-Pararhizobium-Rhizobium; s__Pararhizobium_giardinii	GTAGTCCACGCCGTAAACGATGAATGTTAGCCGTCGGCAAGTTTACTTGTCGGTGGCGCAGCTAACGCATTAAACATTCCGCCTGGGGAGTACGGTCGCAAGATTAAAACTCAAAGGAATTGACGGGGGCCCGCACAAGCGGTGGAGCATGTGGTTTAATTCGAAGCAACGCGCAGAACCTTACCAGCTCTTGACATCCCGATCGCGGACAGTGGAGACATTGTCCTTCAGTTAGGCTGGATCGGTGACAGGTGCTGCATGGCTGTCGTCAGCTCGTGTCGTGAGATGTTGGGTTAAGTCCCGCAA	426	234	877	113	173	85	69	461	212	154	105	302	40	166	141	13	197	1531	38	55	260	340	18	13	253	187	0	17	226	0	12	44	587	370	309	0	0	0	88	160	137	17	45	26	2069	107
61083f27c1d53eb552dd8a38d2764fb5	bASV173	d__Bacteria; p__Proteobacteria; c__Alphaproteobacteria; o__Sphingomonadales; f__Sphingomonadaceae; g__Sphingomonas	GTAGTCCACGCCGTAAACGATGATGACTAGCTGTCCGGGCACTTAGTGCTTGGGTGGCGCAGCTAACGCGTTAAGTCATCCGCCTGGGGAGTACGGCCGCAAGGTTAAAACTCAAAGAAATTGACGGGGGCCTGCACAAGCGGTGGAGCATGTGGTTTAATTCGAAGCAACGCGCAGAACCTTACCAGCGTTTGACATGGTAGGACGGTTTCCAGAGATGGATTCCTTCCCTTACGGGACCTACACACAGGTGCTGCATGGCTGTCGTCAGCTCGTGTCGTGAGATGTTGGGTTAAGTCCCGCAAC	116	62	204	206	456	129	0	723	121	191	88	81	267	155	112	0	0	68	0	32	63	84	2030	85	82	351	266	219	941	516	146	229	0	0	166	1785	1944	262	28	139	142	599	274	693	54	67
2f3cf818c44a1c9031f4c2fd4b2b3a2d	bASV174	d__Bacteria; p__Acidobacteriota; c__Acidobacteriae; o__Subgroup_2; f__Subgroup_2; g__Subgroup_2; s__uncultured_Acidobacteria	GTAGTCCTAGCCCTAAACGATCAGGACTTGGGGTGCCACCCGTTCGGGTGTCGTCCCGGAGCTAACGCGTTAAGTCCTGCACCTGGGGAGTACGGTCGCAAGACTGAAACTCAAAGGAATTGACGGGGGCCCGCACAAGCGGTGGAACATGTGGTTCAATTCGACGCTACGCGAGGAACCTTACCTGGGCTCGAAATGCTTCTGACAAGCTGTAGAAATACGGCCTTCCCGCAAGGGACAGGAGTATAGGCGCTGCATGGCTGTCGTCAGCTCGTGCCGTGAGGTGTTGGGTTAAGTCCCGCAACG	0	0	0	295	2138	407	156	143	0	0	0	0	0	0	0	0	1019	0	144	195	173	655	278	288	113	0	0	0	0	0	132	0	0	0	0	0	417	188	0	0	0	0	0	0	0	0
5716d69ccbec4aea24aa30be1ce7c8c1	bASV175	d__Bacteria; p__Proteobacteria; c__Gammaproteobacteria; o__Pseudomonadales; f__Pseudomonadaceae; g__Pseudomonas	GTAGTCCACGCCGTAAACGATGTCAACTAGCCGTTGGGAGCCTTGAGCTCTTAGTGGCGCAGCTAACGCATTAAGTTGACCGCCTGGGGAGTACGGCCGCAAGGTTAAAACTCAAATGAATTGACGGGGGCCCGCACAAGCGGTGGAGCATGTGGTTTAATTCGAAGCAACGCGAAGAACCTTACCAGGCCTTGACATCCAATGAACTTTCCAGAGATGGATTGGTGCCTTCGGGAGCATTGAGACAGGTGCTGCATGGCTGTCGTCAGCTCGTGTCGTGAGATGTTGGGTTAAGTCCCGTAACGA	0	0	121	0	0	0	0	0	0	115	0	0	0	0	362	0	0	0	0	0	197	108	0	0	200	0	0	0	0	0	0	0	0	0	378	0	0	0	0	34	0	0	0	0	0	0
f53a2cead49c587e661324420ce0cb72	bASV176	d__Bacteria; p__Acidobacteriota; c__Acidobacteriae; o__Solibacterales; f__Solibacteraceae; g__Candidatus_Solibacter	GTAGTCCACGCCCTAAACGATGCATATTTGGTGTGGGCAGTTCATTCTGTCCGTGCCGGAGCTAACGCGTTAAATATGCCGCCTGGGGAGTACAGTCGCAAGGCTGAAACTCAAAGGAATTGACGGGGGCCCGCACAAGCGGTGGAGCATGTGGTTCAATTCGACGCAACGCGAAGAACCTTACCTGGGCTCGAACGGCTGGTCAACGGAGGTGGAAACATCTTTACCCCGCAAGGGGGTCCAGTCGAGGTGCTGCATGGCTGTCGTCAGCTCGTGTCGTGAGATGTTGGGTTAAGTCCCGCAACG	57	119	97	580	0	575	183	894	342	423	373	53	704	414	204	0	630	1132	346	349	564	568	410	202	601	435	141	120	328	0	213	191	243	246	208	869	123	55	0	100	64	186	265	194	293	198
b052127f038534347cc183163bdc8616	bASV177	d__Bacteria; p__Actinobacteriota; c__Thermoleophilia; o__Gaiellales; f__Gaiellaceae; g__Gaiella; s__uncultured_Conexibacter	GTAGTCCACGCCGTAAACGATGGGTGCTAGGTGTGGGAGGTGTCGACTCCTCCCGTGCCGCAGCTAACGCATTAAGCACCCCGCCTGGGGAGTACGGCCGCAAGGCTAAAACTCAAAGGAATTGACGGGGGCCCGCACAAGCAGCGGAGCATGTTGTTTAATTCGACGCGACGCGAAGAACCTTACCAGGGCTTGAAATGCTCGGGAAAGCCGGGGAAACTCGGCCCTCCTTCGGGACTCGAGTACAGGTGGTGCATGGCTGTCGTCAGCTCGTGTCGTGAGATGTTGGGTTAAGTCCCGCAACGA	0	0	0	1331	0	1242	1101	1549	942	197	91	0	1864	129	0	0	589	2696	1155	341	959	810	354	38	1077	579	27	29	101	0	158	77	353	413	0	0	123	0	0	26	26	270	591	812	0	504
8b442843c311256494f6374a4351a6d4	bASV178	d__Bacteria; p__Proteobacteria; c__Alphaproteobacteria; o__Sphingomonadales; f__Sphingomonadaceae; g__Sphingomonas	GTAGTCCACGCCGTAAACGATGATGACTAGCTGTCGGGGCTCTTGGAGTTTCGGTGGCGCAGCTAACGCGTTAAGTCATCCGCCTGGGGAGTACGGCCGCAAGGTTAAAACTCAAAGAAATTGACGGGGGCCTGCACAAGCGGTGGAGCATGTGGTTTAATTCGAAGCAACGCGCAGAACCTTACCAGCGTTTGACATGGTAGGACGGTTTCCAGAGATGGATTCCTTCCCTTACGGGACCTACACACAGGTGCTGCATGGCTGTCGTCAGCTCGTGTCGTGAGATGTTGGGTTAAGTCCCGCAAC	757	354	582	364	0	568	148	862	241	981	0	303	450	337	0	0	563	886	142	198	435	896	617	85	399	878	376	327	1224	0	305	555	279	245	339	0	203	94	528	1159	1020	499	510	681	0	142
90fa09f0844c7637ac82185cd01b57a4	bASV179	d__Bacteria; p__Actinobacteriota; c__Actinobacteria; o__Corynebacteriales; f__Mycobacteriaceae; g__Mycobacterium	GTAGTCCACGCCGTAAACGGTGGGTACTAGGTGTGGGTTTCCTTCCTTGGGATCCGTGCCGTAGCTAACGCATTAAGTACCCCGCCTGGGGAGTACGGCCGCAAGGCTAAAACTCAAAGGAATTGACGGGGGCCCGCACAAGCGGCGGAGCATGTGGATTAATTCGATGCAACGCGAAGAACCTTACCTGGGTTTGACATGCACAGGACGACTGCAGAGATGTGGTTTCCCTTGTGGCCTGTGTGCAGGTGGTGCATGGCTGTCGTCAGCTCGTGTCGTGAGATGTTGGGTTAAGTCCCGCAACGA	479	76	176	481	0	491	224	746	387	415	289	157	470	800	236	0	0	1842	280	330	585	508	474	331	329	924	162	134	224	0	66	118	393	401	260	550	0	0	179	400	407	211	251	458	217	235
44870d35fe508b789262357c25c09935	bASV180	d__Bacteria; p__Actinobacteriota; c__Thermoleophilia; o__Solirubrobacterales; f__67-14; g__67-14; s__metagenome	GTAGTCCACGCCGTAAACGATGGGTACTAGGTGTGGGAGGTGTCGACTCCTCCCGTGCCGTCGCTAACGCACTAAGTACCCCGCCTGGGGAGTACGGCCGCAAGGCTAAAACTCAAAGGAATTGACGGGGGCCCGCACAAGCAGCGGAGCATGTGGTTTAATTCGACGCAACGCGAAGAACCTTACCTGGGCTTGACATGTCAGTGACCGCCGTGGAAACACGGTTTTCCTTCGGGACACTGTCACAGGTGGTGCATGGCTGTCGTCAGCTCGTGTCGTGAGATGTTGGGTTAAGTCCCGCAACGA	0	0	23	465	911	103	168	584	140	1052	205	0	114	101	92	0	2173	246	138	225	575	572	848	186	413	0	0	0	135	0	216	28	86	104	0	570	288	109	0	0	18	32	19	62	23	31
ca23b3b494b7ebc82c45d1f412a187fc	bASV181	d__Bacteria; p__Proteobacteria; c__Alphaproteobacteria; o__Rhizobiales; f__Rhizobiaceae; g__Allorhizobium-Neorhizobium-Pararhizobium-Rhizobium	GTAGTCCACGCCGTAAACGATGAATGTTAGCCGTCGGGCAGTATACTGTTCGGTGGCGCAGCTAACGCATTAAACATTCCGCCTGGGGAGTACGGTCGCAAGATTAAAACTCAAAGGAATTGACGGGGGCCCGCACAAGCGGTGGAGCATGTGGTTTAATTCGAAGCAACGCGCAGAACCTTACCAGCCCTTGACATCCTCGGACAGCTGCAGAGATGCAGTCTCCACTTCGGTGGCCGAGAGACAGGTGCTGCATGGCTGTCGTCAGCTCGTGTCGTGAGATGTTGGGTTAAGTCCCGCAACGAG	834	881	625	70	0	70	0	124	40	306	175	316	87	122	483	0	0	238	0	60	95	98	15	14	80	0	0	0	64	0	38	51	159	66	63	0	75	0	44	145	71	74	170	176	1407	40
f90ef8f640f917f7dccfeb6700d2e63f	bASV182	d__Bacteria; p__Proteobacteria; c__Alphaproteobacteria; o__Rhizobiales; f__Xanthobacteraceae	GTAGTCCACGCTGTAAACGATGGATGCTAGCCGTTGGCGAGCTTGCTCGTCAGTGGCGCAGCTAACGCTTTAAGCATCCCGCCTGGGGAGTACGGTCGCAAGATTAAAACTCAAAGGAATTGACGGGGGCCCGCACAAGCGGTGGAGCATGTGGTTCAATTCGAAGCAACGCGAAGAACCTTACCAGCCCTTGACATCCCGGTCGCGGAGAGCAGAGACGCACTCCTTCAGTTCGGCTGGACCGGAGACAGGTGCTGCATGGCTGTCGTCAGCTCGTGTCGTGAGATGTTGGGTTAAGTCCCGCAA	0	0	0	430	967	3973	350	457	390	0	0	0	2153	183	0	0	0	1940	418	437	216	312	156	50	437	0	0	0	0	0	0	0	362	453	0	0	0	0	0	0	0	0	0	0	122	429
6bf0280412233eba4d7b6bf5d8369435	bASV183	d__Bacteria	GTAGTCCACGCTGTAAACGATGGGCACTAGGTGTCCGGGGTATTGACCCCCTGGGTGCCGCAGCTAACGCATTAAGTGCCCCGCCTGGGGAGTACGGTCGCAAGATTAAAACTCAAAGGAATTGACGGGGGCCCGCACAAGCGGTGGAGCATGTGGTTCAATTCGACGCAACGCGAAGAACCTTACCTGGGCTAGACAACGGCGGACCGTCCTAGAAATAGGATTTTCCCTTCGGGGACCGCCGGTTCAGGTGCTGCATGGCTGTCGTCAGCTCGTGCCGTGAGGTGTTGGGTTAAGTCCCGCAAC	0	0	0	6890	0	273	172	10840	3399	748	1194	0	554	206	1508	33	3101	1598	0	1209	1724	805	0	0	2025	3235	0	0	81	0	0	0	969	1778	0	0	0	0	0	0	0	0	70	97	1698	1156
d64d6b764cfcf11abba11b24441cea83	bASV184	d__Bacteria; p__Proteobacteria; c__Alphaproteobacteria; o__Rhizobiales; f__Devosiaceae; g__Devosia	GTAGTCCACGCCGTAAACTATGAGAGCTAGCCGTTGGAGGGTTTACCCTTCAGTGGCGCAGCTAACGCATTAAGCTCTCCGCCTGGGGAGTACGGTCGCAAGATTAAAACTCAAAGGAATTGACGGGGGCCCGCACAAGCGGTGGAGCATGTGGTTTAATTCGAAGCAACGCGAAGAACCTTACCAGCCCTTGACATGGCAGGACGGTTTCCAGAGATGGATTCCTTCACTTCGGTGACTTGCACACAGGTGCTGCATGGCTGTCGTCAGCTCGTGTCGTGAGATGTTGGGTTAAGTCCCGCAACG	132	131	169	693	1668	276	171	805	267	267	237	96	634	277	192	0	1554	1294	186	151	787	288	422	0	732	677	160	152	255	0	57	92	431	302	325	580	690	433	59	97	0	384	154	237	95	442
c91ef5f75b8e04d04060309aa2ec698e	bASV185	d__Bacteria; p__Actinobacteriota; c__Thermoleophilia; o__Gaiellales; f__Gaiellaceae; g__Gaiella; s__uncultured_Rubrobacteria	GTAGTCCACGCCGTAAACGATGGGTGCTAGGTGTGGGCGGTGTCGACTCCGTCCGTGCCGAAGCTAACGCATTAAGCACCCCGCCTGGGGAGTACGGCCGCAAGGCTAAAACTCAAAGGAATTGACGGGGGCCCGCACAAGCAGCGGAGCATGTTGTTTAATTCGACGCGACGCGAAGAACCTTACCAAGGCTTGACATGCACGGGAATGTCGTAGAAATACGGCAGCCCTTCGGGGCTCGTGCACAGGTGGTGCATGGCTGTCGTCAGCTCGTGTCGTGAGATGTTGGGTTAAGTCCCGCAACGA	0	0	0	1562	1367	481	126	3075	1073	356	301	0	749	0	149	0	0	1569	131	436	177	276	461	172	152	1110	279	205	834	0	86	42	259	310	0	1027	45	0	55	0	119	449	360	623	149	308
b6c3e6d61404d559d64d10e6c0976d73	bASV186	d__Bacteria; p__Proteobacteria; c__Gammaproteobacteria; o__Enterobacterales; f__Erwiniaceae	GTAGTCCACGCCGTAAACGATGTCGACTTGGAGGTTGTTCCCTTGAGGAGTGGCTTCCGGAGCTAACGCGTTAAGTCGACCGCCTGGGGAGTACGGCCGCAAGGTTAAAACTCAAATGAATTGACGGGGGCCCGCACAAGCGGTGGAGCATGTGGTTTAATTCGATGCAACGCGAAGAACCTTACCTACTCTTGACATCCACGGAATTCGGCAGAGATGCCTTAGTGCCTTCGGGAACCGTGAGACAGGTGCTGCATGGCTGTCGTCAGCTCGTGTTGTGAAATGTTGGGTTAAGTCCCGCAACGA	0	0	277	70	0	0	0	0	0	0	0	0	124	63	0	0	0	0	0	0	0	0	88	57	0	0	0	0	0	0	0	0	0	0	0	0	0	0	0	0	0	0	0	0	76	0
5c26046aab65b166c208c51411133efa	bASV187	d__Bacteria; p__Acidobacteriota; c__Subgroup_5; o__Subgroup_5; f__Subgroup_5; g__Subgroup_5; s__uncultured_bacterium	GTAGTCCTAGCCCTAAACGATGGATACTTGGTGTGACTGGGATTGAATCCAGTCGTGCCGAAGCTAACGCATTAAGTATCCCGCCTGGGGAGTACGGTCGCAAGGCTGAAACTCAAAGGAATTGACGGGGGCCCGCACAAGCGGTGGAGTATGTGGTTTAATTCGACGCAACGCGAAGAACCTTACCTGGGCTCGAACGGCTAGTGACAGGTGGCGAAAGTCGCTTTTCCCGCAAGGGACACTAGTCGAGGTGCTGCATGGCTGTCGTCAGCTCGTGTCGTGAGATGTTGGGTTAAGTCCCGCAAC	176	0	102	607	1501	547	197	749	312	0	0	143	1580	282	244	0	0	748	0	209	457	300	881	79	423	0	184	361	1568	0	330	183	0	0	0	1106	67	0	0	0	80	168	313	508	123	323
3eecc082c5531daa5d58603a3655830c	bASV188	d__Bacteria; p__Chloroflexi; c__Dehalococcoidia; o__S085; f__S085; g__S085; s__uncultured_bacterium	GTAGTCCACGCCCTAAACGGTGGATGCTAGGTGTAGGGGGTGTCGACCCCCTCTGTGCCGCAGCTAACGCTTTAAGCATCCCGCCTGGGGAGTACGGCCGCAAGGCTAAAACTCAAAGGAATTGACGGGGGCCCGCACAAGCGGCGGAGCGTGTGGTTTAATTCGATGCAACGCGAAGAACCTTACCAGGGCTTGACATGCTAGTAGTACTGATCAGAAACGTGAGGGACCCTTCGGGGAGCTAGCACAGGTGCTGCATGGCTGTCGTCAGCTCGTGCCGTGAGGTGTTGGGTTAAGTCCCGCAAC	4581	416	6799	0	0	142	0	82	0	0	108	702	0	234	1325	0	0	457	0	0	0	0	0	0	0	0	0	6	73	386	48	148	54	118	1255	0	0	0	102	641	204	146	413	325	665	273
b7f88e53dd16e827ae963061209253d6	bASV189	d__Bacteria; p__Proteobacteria; c__Gammaproteobacteria; o__Burkholderiales; f__Comamonadaceae	GTAGTCCACGCCCTAAACGATGTCAACTGGTTGTTGGGAAGGTTTCTTCTCAGTAACGTAGCTAACGCGTGAAGTTGACCGCCTGGGGAGTACGGCCGCAAGGTTGAAACTCAAAGGAATTGACGGGGACCCGCACAAGCGGTGGATGATGTGGTTTAATTCGATGCAACGCGAAAAACCTTACCTACCCTTGACATGCCAGGAATCCCATAGAGATATGGGAGTGCTCGAAAGAGAACCTGGGCACAGGTGCTGCATGGCCGTCGTCAGCTCGTGTCGTGAGATGTTGGGTTAAGTCCCGCAACG	874	629	430	308	0	0	0	236	142	277	351	344	27	0	518	0	0	407	40	82	223	235	71	39	211	508	0	0	198	2681	759	2083	237	214	622	0	0	0	313	950	659	97	221	357	523	90
6adf1062ea4182c0d2099d97ba712def	bASV190	d__Bacteria; p__Proteobacteria; c__Alphaproteobacteria; o__Rhizobiales; f__Hyphomicrobiaceae; g__Pedomicrobium; s__uncultured_Alphaproteobacteria	GTAGTCCACGCCTTAAACGATGGATGCTAGCCGTCAGCAAGCATGCTTGTTGGTGGCGCAGCTAACGCATTAAGCATCCCGCCTGGGGAGTACGGCCGCAAGGTTAAAACTCAAAGGAATTGACGGGGGCCCGCACAAGCGGTGGAGCATGTGGTTTAATTCGACGCAACGCGAAGAACCTTACCAGTCCTTGACATTCTCCGGGCGGTTTCCAGAAATGGATTCCTCCTAGCAATAGGTCGGAGAACAGGTGCTGCATGGCTGTCGTCAGCTCGTGTCGTGAGATGTTGGGTTAAGTCCCGCAAC	261	0	130	2544	271	569	212	2841	1324	796	776	143	1105	480	385	0	726	3089	203	892	1682	713	0	0	1557	985	22	0	136	0	191	322	562	651	0	0	0	0	202	320	335	49	111	99	3301	668
285df47165683ce24f4f7aa480ffe509	bASV191	d__Bacteria; p__Actinobacteriota; c__MB-A2-108; o__MB-A2-108; f__MB-A2-108; g__MB-A2-108	GTAGTCCTAGCCGTAAACGTTGGGTGCTAGGTGTGGGCGGACATCGACCCCGTCCGTGCCGAAGCTAACGCATTAAGCACCCCGCCTGGGGAGTACGGCCGCAAGGCTAAAACTCAAAGGAATTGACGGGGGCCCGCACAAGCGGCGGAGCATGCGGCTTAATTCGATGCGACGCGAAGAACCTTACCTGGGCTTGACATGCAGGGCAAAGCCGGTGAAAGCCGGCGCTCTACGGAGCCTGCACAGGTGGTGCATGGCTGTCGTCAGCTCGTGCCGTGAGGTGTTGCCTTAAGTGGCGCAACGAGC	3448	340	2113	947	0	234	0	1476	688	395	294	787	103	78	637	0	0	3211	0	280	328	0	0	0	339	0	77	49	504	0	63	125	617	1047	646	0	0	0	866	1880	2662	247	646	501	1879	110
ece5a5e018744ec6afa212ef87a3efcd	bASV192	d__Bacteria; p__Actinobacteriota; c__Actinobacteria; o__Frankiales; f__Acidothermaceae; g__Acidothermus; s__uncultured_bacterium	GTAGTCCACGCTGTAAACGTTGGGCGCTAGGTGTGGGGTCCTTCCACGGATTCCGTGCCGCAGCTAACGCATTAAGCGCCCCGCCTGGGGAGTACGGCCGCAAGGCTAAAACTCAAAGGAATTGACGGGGGCCCGCACAAGCGGCGGAGCATGTTGCTTAATTCGACGCGACGCGAAGAACCTTACCAAGGTTTGACATGCAGGGAAAAGCCGTAGAGATACGGTGTCCGTAAGGGCCCTGCACAGGTGGTGCATGGCTGTCGTCAGCTCGTGTCGTGAGATGTTGGGTTAAGTCCCGCAACGAGC	0	0	0	1472	502	823	1315	2184	921	256	151	0	1606	208	64	0	2313	2415	1872	545	800	1969	366	105	494	524	0	0	0	0	0	0	292	251	0	0	0	0	0	0	0	0	0	0	95	125
2903f01a153f5cb752747254247d6d6a	bASV193	d__Bacteria; p__Acidobacteriota; c__Subgroup_11; o__Subgroup_11; f__Subgroup_11; g__Subgroup_11; s__uncultured_bacterium	GTAGTCCTAGCTGTAAACGATGGATACTTGCTGTGGGGGGTGTTAAATCCCCCTGTGGCGGAGCTAACGCATTAAGTATCCCGCCTGGGGAGTACGGTCGCAAGGCTGAAACTCAAAGGAATTGACGGGGGCCCGCACAAGCGGTGGAGCATGTGGTTCAATTCGACGCAACGCGAAGAACCTTACCTGGGCTTGAACTGGAGTGGAAGCAGGCAGAGATGTCTGTGTCCTTTACCGGACTGCTCTAGAGGTGCTGCATGGCTGTCGTCAGCTCGTGTCGTGAGATGTTGGGTTAAGTCCCGCAAC	1417	163	518	454	368	751	31	754	436	114	273	454	866	243	399	0	0	1625	37	135	170	34	153	25	208	0	148	134	1171	1304	486	1517	233	411	671	376	0	0	129	392	262	69	170	254	1594	440
37ff8bc5a58c9e15bf5cffb4db4d5066	bASV194	d__Bacteria; p__Actinobacteriota; c__Actinobacteria; o__Streptomycetales; f__Streptomycetaceae; g__Streptomyces	GTAGTCCACGCCGTAAACGTTGGGAACTAGGTGTTGGCGACATTCCACGTCGTCGGTGCCGCAGCTAACGCATTAAGTTCCCCGCCTGGGGAGTACGGCCGCAAGGCTAAAACTCAAAGGAATTGACGGGGGCCCGCACAAGCGGCGGAGCATGTGGCTTAATTCGACGCAACGCGAAGAACCTTACCAAGGCTTGACATATACCGGAAAGCATTAGAGATAGTGCCCCCCTTGTGGTCGGTATACAGGTGGTGCATGGCTGTCGTCAGCTCGTGTCGTGAGATGTTGGGTTAAGTCCCGCAACGA	1647	0	997	269	380	241	1269	412	120	797	380	448	191	175	133	33	1291	627	460	351	770	1266	86	0	823	0	111	0	359	0	75	99	205	308	188	0	0	0	134	167	224	35	47	57	626	114
b45b1460719052df7989a0b1ac6a91d9	bASV195	d__Bacteria; p__Proteobacteria; c__Alphaproteobacteria; o__Rhizobiales; f__Xanthobacteraceae; g__uncultured	GTAGTCCACGCCGTAAACGATGGATGCTAGCCGTTGTCGGGTTTACCCGTCAGTGGCGCAGCTAACGCATTAAGCATCCCGCCTGGGGAGTACGGTCGCAAGATTAAAACTCAAAGGAATTGACGGGGGCCCGCACAAGCGGTGGAGCATGTGGTTCAATTCGAAGCAACGCGAAGAACCTTACCAGCTTTTGACATCCCGGTCGCGGGCACCAGAAATGGAGCCTTTCAGTTAGGCTGGACCGGAGACAGGTGCTGCATGGCTGTCGTCAGCTCGTGTCGTGAGATGTTGGGTTAAGTCCCGCAA	0	0	0	0	382	341	0	0	0	0	0	0	209	0	0	0	0	0	0	0	0	0	45	0	0	0	0	0	0	0	0	0	0	0	0	0	0	0	0	0	0	0	0	0	0	0
70cf1637b3db9f6f4b79c435270a900a	bASV196	d__Bacteria; p__Acidobacteriota; c__Acidobacteriae; o__Acidobacteriales; f__uncultured; g__uncultured	GTAGTCCTAGCCCTAAACGATGGATGCTTGGTGTGTTGGGTACCCAATCCCAACGTGCCGAAGCTAACGCGATAAGCATCCCGCCTGGGGAGTACGGTCGCAAGGCTGAAACTCAAAGGAATTGACGGGGGCCCGCACAAGCGGTGGAGCATGTGGTTCAATTCGACGCAACGCGAAGAACCTTACCTGGGCTCGAAGCGCAGTGGACCGGGGTAGAAATATCCCTTTCTCGCAAGAGACTGCTGCGGAGGTGCTGCATGGCTGTCGTCAGCTCGTGTCGTGAGATGTTGGGTTAAGTCCCGCAAC	0	0	0	733	2459	821	170	1016	386	77	191	0	1183	0	0	0	0	19	229	92	151	752	1107	264	179	352	43	40	23	0	44	0	0	0	0	0	303	54	0	0	0	30	0	26	0	0
70fe79b736fb24ff3e1d0735e82fc97e	bASV197	d__Bacteria; p__Proteobacteria; c__Alphaproteobacteria; o__Rhizobiales; f__Rhizobiaceae; g__Allorhizobium-Neorhizobium-Pararhizobium-Rhizobium; s__Rhizobium_rhizogenes	GTAGTCCACGCCGTAAACGATGAATGTTAGCCGTCGGGCAGTATACTGTTCGGTGGCGCAGCTAACGCATTAAACATTCCGCCTGGGGAGTACGGTCGCAAGATTAAAACTCAAAGGAATTGACGGGGGCCCGCACAAGCGGTGGAGCATGTGGTTTAATTCGAAGCAACGCGCAGAACCTTACCAGCCCTTGACATCCTGTGTTACCCGTAGAGATATGGGGTCCACTTCGGTGGCGCAGAGACAGGTGCTGCATGGCTGTCGTCAGCTCGTGTCGTGAGATGTTGGGTTAAGTCCCGCAACGAG	0	0	0	136	0	0	97	266	79	33	0	0	99	0	0	0	0	0	331	72	47	134	0	46	95	309	0	0	0	0	0	0	0	0	0	0	1169	277	0	0	0	0	0	0	0	0
fa9a6a415f3b72a0d9d14e8d1c8d920b	bASV198	d__Bacteria; p__Proteobacteria; c__Alphaproteobacteria; o__Reyranellales; f__Reyranellaceae; g__Reyranella	GTAGTCCACGCCGTAAACGATGGGTGCTAGACGTTGGCGAGCTTGCTCGTCAGTGTCGCAGCTAACGCGTTAAGCACCCCGCCTGGGGAGTACGGCCGCAAGGTTGAAACTCAAAGGAATTGACGGGGGCCCGCACAAGCGGTGGAGCATGTGGTTCAATTCGACGCAACGCGCAGAACCTTACCAGCCCTTGACATGGGAGTCGCCGGGACCAGAGACGGTCCCTTCGGTTCGGCCGGACTCCGCACAGGTGCTGCATGGCTGTCGTCAGCTCGTGTCGTGAGATGTTGGGTTAAGTCCCGCAAC	357	55	310	512	964	421	196	635	288	298	107	130	1019	173	410	0	0	867	283	201	298	414	1124	57	285	0	242	207	1951	987	347	577	221	226	820	487	109	54	312	769	347	637	1090	1630	877	259
e8150c696e82cb0037c67c537b2534a7	bASV199	d__Bacteria; p__Actinobacteriota; c__Thermoleophilia; o__Solirubrobacterales; f__67-14; g__67-14	GTAGTCCACGCCGTAAACGATGGGCACTAGGTGTGGGAGGTGTCGACTCCTCCCGTGCCGCAGCTAACGCATTAAGTGCCCCGCCTGGGGAGTACGGCCGCAAGGCTAAAACTCAAAGGAATTGACGGGGGCCCGCACAAGCAGCGGAGCATGTGGTTTAATTCGACGCAACGCGAAGAACCTTACCTGGGCTTGACATGTTGGTCGTACCTGTGGAAACACAGGGTCAGTTCGGCTGGACCATCACAGGTGGTGCATGGCTGTCGTCAGCTCGTGTCGTGAGATGTTGGGTTAAGTCCCGCAACG	238	102	60	0	869	175	0	50	0	38	0	79	197	100	127	37	0	73	0	0	0	0	3585	216	0	0	743	461	2589	726	361	446	0	0	421	2484	330	124	252	633	693	1088	1404	3326	48	116
79bacc546dad852cbdea72d7a9938c47	bASV200	d__Bacteria; p__Proteobacteria; c__Gammaproteobacteria; o__Burkholderiales; f__B1-7BS; g__B1-7BS; s__uncultured_bacterium	GTAGTCCACGCCCTAAACGATGACGACTAGTTGTTGGGGTAGAAGTACCTTAGTAACGCAGCTAACGCGTGAAGTCGTCCGCCTGGGGAGTACGGTCGCAAGATTAAAACTCAAAGGAATTGACGGGGGCCCGCACAAGCGGTGGATGATGTGGATTAATTCGATGCAACGCGAAAAACCTTACCTACTCTTGACATCCCAGGAGCCTCGCAGAGATGTGAGGGTGCCCGAAAGGGAACCTGGAGACAGGTGCTGCATGGCTGTCGTCAGCTCGTGTCGTGAGATGTTGGGTTAAGTCCCGCAACG	463	48	998	1212	0	1123	0	2479	685	562	1116	157	2684	977	1068	0	476	4387	82	491	1082	664	0	0	870	793	0	0	111	0	0	109	672	827	108	0	0	0	17	37	0	0	0	0	3678	862
8d23d171692b7d467c0475d7b55a683b	bASV201	d__Bacteria; p__Proteobacteria; c__Gammaproteobacteria; o__Burkholderiales; f__Comamonadaceae; g__Variovorax; s__Variovorax_soli	GTAGTCCACGCCCTAAACGATGTCAACTGGTTGTTGGGGATTCACTTCCTCAGTAACGAAGCTAACGCGTGAAGTTGACCGCCTGGGGAGTACGGCCGCAAGGTTGAAACTCAAAGGAATTGACGGGGACCCGCACAAGCGGTGGATGATGTGGTTTAATTCGATGCAACGCGAAAAACCTTACCCACCTTTGACATGTACGGAATTTGCCAGAGATGGCTTAGTGCTCGAAAGAGAACCGTAACACAGGTGCTGCATGGCTGTCGTCAGCTCGTGTCGTGAGATGTTGGGTTAAGTCCCGCAACG	356	399	259	65	0	212	0	104	31	427	0	151	91	113	426	0	0	71	0	64	73	146	849	41	130	0	65	165	347	464	269	233	0	0	121	0	1612	88	78	299	163	30	24	0	495	53
c200f3e7e30d2c20532462723956da0e	bASV202	d__Bacteria; p__Proteobacteria; c__Alphaproteobacteria; o__Rhizobiales; f__Xanthobacteraceae; g__uncultured	GTAGTCCACGCCGTAAACGATGGATGCTAGCCGTTGGCGGGTTTACCCGTCAGTGGCGCAGCTAACGCATTAAGCATCCCGCCTGGGGAGTACGGTCGCAAGATTAAAACTCAAAGGAATTGACGGGGGCCCGCACAAGCGGTGGAGCATGTGGTTCAATTCGAAGCAACGCGCAGAACCTTACCAGCCCTTGACATCCCGGTCGCGGGAACCAGAGATGGATCCCTTCAGTTCGGCTGGACCGGAGACAGGTGCTGCATGGCTGTCGTCAGCTCGTGTCGTGAGATGTTGGGTTAAGTCCCGCAA	0	0	0	124	1261	179	0	0	0	0	0	0	101	0	0	0	0	156	0	189	0	154	0	249	0	0	0	0	0	0	90	0	0	0	0	0	0	0	0	67	57	0	0	0	97	0
ffed59cc855f00eb768c30633d6b9fa6	bASV203	d__Bacteria; p__Actinobacteriota; c__Actinobacteria; o__Propionibacteriales; f__Nocardioidaceae; g__Nocardioides	GTAGTCCACACCGTAAACGTTGGGCGCTAGGTGTGGGATCCATTCCACGGGTTCCGTGCCGCAGCTAACGCATTAAGCGCCCCGCCTGGGGAGTACGGCCGCAAGGCTAAAACTCAAAGGAATTGACGGGGGCCCGCACAAGCGGCGGAGCATGCGGATTAATTCGATGCAACGCGAAGAACCTTACCTGGGTTTGACATACACCGGAAAGCTGCAGAGATGTAGCCCCTTTTAGTCGGTGTACAGGTGGTGCATGGCTGTCGTCAGCTCGTGTCGTGAGATGTTGGGTTAAGTCCCGCAACGAGC	900	595	512	316	894	156	162	373	187	326	156	330	160	173	286	0	0	270	197	145	260	599	400	51	275	1033	134	117	394	822	205	345	0	121	278	803	97	0	250	472	780	412	588	771	0	60
bd189c1a728dc63a31ca48e42eb04be0	bASV204	d__Bacteria; p__Proteobacteria; c__Gammaproteobacteria; o__Aeromonadales; f__Aeromonadaceae; g__Aeromonas	GTAGTCCACGCCGTAAACGATGTCGATTTGGAGGCTGTGTCCTTGAGACGTGGCTTCCGGAGCTAACGCGTTAAATCGACCGCCTGGGGAGTACGGCCGCAAGGTTAAAACTCAAATGAATTGACGGGGGCCCGCACAAGCGGTGGAGCATGTGGTTTAATTCGATGCAACGCGAAGAACCTTACCTGGCCTTGACATGTCTGGAATCCTGCAGAGATGCGGGAGTGCCTTCGGGAATCAGAACACAGGTGCTGCATGGCTGTCGTCAGCTCGTGTCGTGAGATGTTGGGTTAAGTCCCGCAACGA	213	748	790	0	0	15	0	0	0	0	0	81	0	0	158	0	0	0	0	0	0	0	145	0	0	0	204	1498	3948	0	56	949	75	0	0	0	0	0	0	0	0	0	87	0	322	0
ab32a35ee55588845ae685070ddeb5cc	bASV205	d__Bacteria; p__Actinobacteriota; c__Actinobacteria; o__Micromonosporales; f__Micromonosporaceae	GTAGTCCACGCTGTAAACGTTGGGCGCTAGGTGTGGGGGGCCTCTCCGGTTCTCTGTGCCGCAGCTAACGCATTAAGCGCCCCGCCTGGGGAGTACGGCCGCAAGGCTAAAACTCAAAGGAATTGACGGGGGCCCGCACAAGCGGCGGAGCATGCGGATTAATTCGATGCAACGCGAAGAACCTTACCTGGGTTTGACATGGGCGCTAAAGCCGCAGAGATGTGGTGTCCTTCGGGGGCGTTCACAGGTGGTGCATGGCTGTCGTCAGCTCGTGTCGTGAGATGTTGGGTTAAGTCCCGCAACGAG	149	0	163	299	2509	744	332	384	274	271	0	92	750	263	327	0	0	414	397	366	383	388	689	144	377	912	274	321	642	0	124	157	0	647	235	973	141	0	173	275	272	371	393	325	326	82
157d5477af367c744d1e564869cf4ab2	bASV206	d__Bacteria; p__Proteobacteria; c__Alphaproteobacteria; o__Rhizobiales; f__Rhizobiaceae; g__Mesorhizobium; s__metagenome	GTAGTCCACGCCGTAAACGATGGAAGCTAGCCGTTGGCAAGTTTACTTGTCGGTGGCGCAGCTAACGCATTAAGCTTCCCGCCTGGGGAGTACGGTCGCAAGATTAAAACTCAAAGGAATTGACGGGGGCCCGCACAAGCGGTGGAGCATGTGGTTTAATTCGAAGCAACGCGCAGAACCTTACCAGCCCTTGACTTCCTGGTCGCGGGACCGAGAGATCGGTCTCTTCAGTTCGGCTGGACCAGTGACAGGTGCTGCATGGCTGTCGTCAGCTCGTGTCGTGAGATGTTGGGTTAAGTCCCGCAA	501	207	663	354	773	527	0	520	234	315	253	280	798	564	337	0	0	1915	0	149	309	219	700	77	241	402	411	202	1080	0	189	248	400	418	424	652	149	28	256	672	504	203	220	504	630	280
66570467f806a15457f41691b441fb5a	bASV207	d__Bacteria; p__Myxococcota; c__Myxococcia; o__Myxococcales; f__Vulgatibacteraceae; g__Vulgatibacter; s__uncultured_bacterium	GTAGTCCACGCCGTAAACGATGGGCGCTAGCCGTTGGGCAGCTTGCTGCTCGGTGGCGCAGCTAACGCTTTAAGCGCCCCGCCTGGGGAGTACGGTCGCAAGATTAAAACTCAAAGGAATTGACGGGGGCCCGCACAAGCGGTGGAGCATGTGGTTTAATTCGAAGCAACGCGCAGAACCTTACCTACCCTTGACATCCCTCACGCGAGGACCAGAGATGGACCTCTTCAGTTCGGCTGGTGAGGAGACAGGTGCTGCATGGCTGTCGTCAGCTCGTGTCGTGAGATGTTGGGTTAAGTCCCGCAA	152	59	415	1369	282	639	234	1759	694	755	545	74	547	347	464	0	620	3999	308	620	1051	627	296	20	772	563	164	123	791	289	173	245	610	699	264	346	0	0	254	509	487	258	410	556	1166	338
6420d18e2042a3dae0a9d45d93fa6a14	bASV208	d__Bacteria; p__Actinobacteriota; c__Thermoleophilia; o__Gaiellales; f__uncultured; g__uncultured	GTAGTCCACGCCGTAAACGATGGGCGCTAGGTGTGGGCGGTGTCGACTCCGTCCGTGCCGAAGCTAACGCATTAAGCGCCCCGCCTGGGGAGTACGGCCGCAAGGCTAAAACTCAAAGGAATTGACGGGGGCCCGCACAAGCAGCGGAGCATGTGGTTTAATTCGACGCAACGCGAAGAACCTTACCAGGGCTTGACATGCACGGGAATTGCGTAGAAATACGTAAGCCCTTCGGGGCTCGTGCACAGGTGGTGCATGGCTGTCGTCAGCTCGTGTCGTGAGATGTTGGGTTAAGTCCCGCAACGA	85	39	122	1777	0	826	155	2920	1042	864	467	51	885	750	684	67	0	3604	97	303	515	1297	236	95	615	733	379	244	1827	238	232	215	917	1397	282	1257	0	0	160	362	534	903	895	1705	403	924
51a92d1e87cc5c6e0e2a18bd40e0a169	bASV209	d__Bacteria; p__Actinobacteriota; c__Actinobacteria; o__Corynebacteriales; f__Mycobacteriaceae; g__Mycobacterium	GTAGTCCACGCCGTAAACGGTGGGTACTAGGTGTGGGTTTCCTTCCTTGGGATCCGTGCCGTAGCTAACGCATTAAGTACCCCGCCTGGGGAGTACGGCCGCAAGGCTAAAACTCAAAGAAATTGACGGGGGCCCGCACAAGCGGCGGAGCATGTGGATTAATTCGATGCAACGCGAAGAACCTTACCTGGGTTTGACATGCACAGGACGCCGGCAGAGATGTCGGTTCCCTTGTGGCCTGTGTGCAGGTGGTGCATGGCTGTCGTCAGCTCGTGTCGTGAGATGTTGGGTTAAGTCCCGCAACGA	98	0	591	2401	0	455	264	4151	777	468	219	0	1247	255	769	0	0	806	457	455	406	356	178	64	364	0	0	0	641	0	0	104	150	0	200	0	63	0	164	345	356	206	228	448	340	171
843ad74bd2c566230f8c47fa0990d047	bASV210	d__Bacteria; p__Proteobacteria; c__Alphaproteobacteria; o__Rhizobiales; f__Xanthobacteraceae; g__uncultured	GTAGTCCACGCCGTAAACGATGGATGCTAGCCGTTGGCAGGCTTGCCTGTCAGTGGCGCAGCTAACGCATTAAGCATCCCGCCTGGGGAGTACGGTCGCAAGATTAAAACTCAAAGGAATTGACGGGGGCCCGCACAAGCGGTGGAGCATGTGGTTCAATTCGAAGCAACGCGCAGAACCTTACCAACCTTTGACATGTCCCGTATGGGTACCAGAGATGGAACCCTTCAGTTCGGCTGGCGGGAACACAGGTGCTGCATGGCTGTCGTCAGCTCGTGTCGTGAGATGTTGGGTTAAGTCCCGCAA	0	0	0	237	1944	874	98	350	153	177	61	0	1393	108	0	0	934	245	129	203	126	182	751	385	181	0	259	155	286	0	159	39	111	67	53	608	631	215	0	0	0	453	420	685	0	68
4c00ba440eff42c9a6087e86115c91bf	bASV211	d__Bacteria; p__Chloroflexi; c__AD3; o__AD3; f__AD3; g__AD3; s__uncultured_bacterium	GTAGTCCACGCCCTAAACGTTGCGAACTAGGTGTTGGTCGGATTGACCCGATCAGTGCCGCAGCTAACGCATTAAGTTCGCCGCCTGGGGACTACGGCCGCAAGGTTAAAACTCAAAGGAATAGGCGGGGGCCCGCACAAGCAGCGGAGCGTGTGGTTTAATTCGAGGCAACGCGAAGAACCTTACCTGGGCTTGACATGTAGAGGAAACGCTGGTGAAAGCCAGCGCCCCTCGCAAGAGGTCTCTACACAGGTGGTGCATGGCTGTCGTCAGCTCGTGCCGTGAGGTGTTGGGTTAAGTCCCGCA	0	0	30	0	0	208	75	0	0	0	71	0	195	0	0	0	0	98	205	0	68	0	0	0	0	0	0	0	0	0	0	0	0	0	0	0	41	0	0	0	0	0	0	0	45	91
bd36409108926edb970609a120367b99	bASV212	d__Bacteria	GTAGTCCACGCTGTAAACGATGGGCACTAGGTGTCCGGGGTATTGACCCCCTGGGTGCCGCAGCTAACGCATTAAGTGCCCCGCCTGGGGAGTACGGTCGCAAGATTAAAACTCAAAGGAATTGACGGGGGCCCGCACAAGCGGTGGAGCATGTGGTTCAATTCGACGCAACGCGAAGAACCTTACCTGGGCTAGACAACGGTGGACCGTCCTAGAAATAGGATTTTCCCTTCGGGGACTGCCGGTTCAGGTGCTGCATGGCTGTCGTCAGCTCGTGCCGTGAGGTGTTGGGTTAAGTCCCGCAAC	251	0	60	1320	0	114	0	2064	609	136	0	181	515	377	471	0	0	343	0	229	266	180	529	41	320	485	143	126	683	0	75	158	210	437	0	0	27	15	214	687	298	188	423	397	697	465
79d83cc0d5fe842747fedd48494e6dd1	bASV214	d__Bacteria; p__Proteobacteria; c__Alphaproteobacteria; o__Micropepsales; f__Micropepsaceae; g__uncultured	GTAGTCCACGCCGTAAACGATGAATGCTAGCCGTTGGGCAGCTTGCTGTTCAGTGGCGCAGCTAACGCATTAAGCATTCCGCCTGGGGAGTACGGCCGCAAGGTTGAAACTCAAAGGAATTGACGGGGGCCCGCACAAGCGGTGGAGCATGTGGTTTAATTCGACGCAACGCGCAGAACCTTACCAGGGTTTGACATCCTGCGACCGCCTCCTAATAGGGGTTTTCCCGCAAGGGACGCAGAGACAGGTGCTGCATGGCTGTCGTCAGCTCGTGTCGTGAGATGTTGGGTTAAGTCCCGCAACGAG	101	27	50	319	0	666	88	279	101	0	0	23	660	141	0	0	0	176	0	0	0	0	2185	526	0	0	151	214	397	0	110	0	0	0	164	1114	3188	730	65	93	0	174	41	126	63	0
fd3cf8e7507fb132ae83819d0be66a73	bASV215	d__Bacteria; p__Bacteroidota; c__Bacteroidia; o__Flavobacteriales; f__Flavobacteriaceae; g__Flavobacterium	GTAGTCCACGCCGTAAACGATGGATACTAGCTGTTGGGGGCAACTTCAGTGGCTAAGCGAAAGTGATAAGTATCCCACCTGGGGAGTACGAACGCAAGTTTGAAACTCAAAGGAATTGACGGGGGCCCGCACAAGCGGTGGAGCATGTGGTTTAATTCGATGATACGCGAGGAACCTTACCAAGGCTTAAATGCAGACTGACCGATTTGGAAACAGATCTTTCGCAAGACAGTTTACAAGGTGCTGCATGGTTGTCGTCAGCTCGTGCCGTGAGGTGTCAGGTTAAGTCCTATAACGAGCGCAACC	70	202	355	0	0	57	0	92	94	0	0	0	34	58	124	0	296	38	0	68	0	339	0	0	118	0	0	0	0	0	0	0	0	0	0	0	0	0	0	0	0	0	0	0	158	0
ebcf6bd288078a17d66f6cba4d60d037	bASV216	d__Bacteria; p__Proteobacteria; c__Gammaproteobacteria; o__Burkholderiales; f__Burkholderiaceae; g__Cupriavidus	GTAGTCCACGCCCTAAACGATGTCAACTAGTTGTTGGGGATTCATTTCTTCAGTAACGTAGCTAACGCGTGAAGTTGACCGCCTGGGGAGTACGGTCGCAAGATTAAAACTCAAAGGAATTGACGGGGACCCGCACAAGCGGTGGATGATGTGGATTAATTCGATGCAACGCGAAAAACCTTACCTACCCTTGACATGCCACTAACGAAGCAGAGATGCCTTAGGTGCCCGAAAGGGAAAGTGGACACAGGTGCTGCATGGCTGTCGTCAGCTCGTGTCGTGAGATGTTGGGTTAAGTCCCGCAAC	727	704	918	0	0	456	58	0	0	0	0	488	56	0	0	0	0	0	0	62	0	0	0	53	121	0	0	0	0	0	0	55	0	0	204	0	178	0	201	530	264	0	110	84	591	47
da1496dba867058de08485cab55fc4e9	bASV217	d__Bacteria; p__Bacteroidota; c__Bacteroidia; o__Chitinophagales; f__Chitinophagaceae	GTAGTCCACGCCCTAAACTATGGATACTCGACATCAGCGATACACTGTTGGTGTCTGAGCGAAAGCATTAAGTATCCCACCTGGGAAGTACGATCGCAAGATTGAAACTCAAAGGAATTGGCGGGGGTCCGCACAAGCGGTGGAGCATGTGGTTTAATTCGATGATACGCGAGGAACCTTACCTGGGCTAGAATGCTGGGAGACCGTGGGTGAAAGCTCACTTTGTAGCAATACACTGCCAGTAAGGTGCTGCATGGCTGTCGTCAGCTCGTGCCGTGAGGTGTTGGGTTAAGTCCCGCAACGAGC	123	61	51	398	0	74	0	450	284	121	359	107	0	420	496	0	578	96	0	101	354	853	186	0	799	760	226	163	881	1427	178	259	108	145	927	1076	0	0	77	573	75	0	72	91	82	624
416e09b45f3a2c92a559dc0dba910dac	bASV218	d__Bacteria; p__Proteobacteria; c__Alphaproteobacteria; o__Micropepsales; f__Micropepsaceae; g__uncultured	GTAGTCCACGCCGTAAACGATGAATGCTAGCCGTTGGGCAGCTTGCTGTTCAGTGGCGCAGCTAACGCATTAAGCATTCCGCCTGGGGAGTACGGCCGCAAGGTTGAAACTCAAAGGAATTGACGGGGGCCCGCACAAGCGGTGGAGCATGTGGTTTAATTCGACGCAACGCGCAGAACCTTACCAGGGTTTGACATCCTGCGACCGCCTCTTAATAGGGGTTTTCCCGCAAGGGACGCAGAGACAGGTGCTGCATGGCTGTCGTCAGCTCGTGTCGTGAGATGTTGGGTTAAGTCCCGCAACGAG	0	0	0	784	1063	0	0	991	340	417	249	0	564	397	106	0	473	157	91	346	401	356	1227	0	465	401	56	0	222	0	77	136	126	0	0	0	0	0	0	85	83	39	44	117	0	41
857c219dc1fd5658e6d1c80b885a86d7	bASV219	d__Bacteria; p__Nitrospirota; c__Nitrospiria; o__Nitrospirales; f__Nitrospiraceae; g__Nitrospira	GTAGTCCACGCCTTAAACTATGAATACTAAGTGTCGGCGGGTTACCGCCGGTGCCGCAGCTAACGCATTAAGTATTCCGCCTGGGAAGTACGGCCGCAAGGTTGAAACTCAAAGGAATTGACGGGGGCCCGCACAAGCGGTGGAGCATGTGGTTTAATTCGACGCAACGCGAAGAACCTTACCCAGGCTGGACATGCAGGTAGTAGAAGGGTGAAAGCCTAACGAGGTAGCAATACCATCCTGCTCAGGTGCTGCATGGCTGTCGTCAGCTCGTGCCGTGAGGTGTTGGGTTAAGTCCCGCAACGA	1284	115	451	0	211	533	0	160	0	279	602	396	907	317	101	0	0	2270	0	138	433	577	0	0	539	724	0	0	260	1144	363	1308	417	503	295	74	0	0	19	0	38	29	110	108	57	250
0415dcc4eb31ec68af5710086c6fdbf7	bASV220	d__Bacteria; p__Proteobacteria; c__Alphaproteobacteria; o__Rhizobiales; f__Methyloligellaceae; g__uncultured; s__metagenome	GTAGTCCACGCCGTAAACTATGGGTGCTAGCCGTCGGGGAGCTTGCTCTTCGGTGGCGCAGCAAACGCATTAAGCACCCCGCCTGGGGAGTACGGTCGCAAGATTAAAACTCAAAGGAATTGACGGGGGCCCGCACAAGCGGTGGAGCATGTGGTTTAATTCGAGGCAACGCGAAGAACCTTACCAGCCCTTGACTTCCCGATCGGGGCTCCGGAGACGGAGCTCTTCAATTGGTCGGTGACAGGTGCTGCATGGCTGTCGTCAGCTCGTGTCGTGAGATGTTGGGTTAAGTCCCGCAACGAGCGC	209	0	279	1705	324	1173	446	2135	1015	667	432	153	1374	1278	497	0	1106	2018	594	691	1327	1267	78	0	1079	1079	155	131	625	0	80	122	510	535	161	154	0	0	0	50	102	115	188	255	127	473
89b75caecd211abfa9030a2334d1b3ec	bASV221	d__Bacteria; p__Proteobacteria; c__Gammaproteobacteria; o__Burkholderiales; f__Burkholderiaceae; g__Burkholderia-Caballeronia-Paraburkholderia	GTAGTCCACGCCCTAAACGATGTCAACTAGTTGTTGGGGATTCATTTCCTTAGTAACGTAGCTAACGCGTGAAGTTGACCGCCTGGGGAGTACGGTCGCAAGATTAAAACTCAAAGGAATTGACGGGGACCCGCACAAGCGGTGGATGATGTGGATTAATTCGATGCAACGCGAAAAACCTTACCTACCCTTGACATGGTCGGAATCCTGCTGAGAGGCGGGAGTGCTCGAAAGAGAACCGGCGCACAGGTGCTGCATGGCTGTCGTCAGCTCGTGTCGTGAGATGTTGGGTTAAGTCCCGCAACG	0	0	0	57	0	63	0	0	0	0	0	0	339	140	0	0	0	0	0	0	0	440	589	1771	0	0	180	103	1277	0	134	0	0	0	0	254	1322	224	0	0	0	80	144	63	0	0
43d2dd20f7f7356e9981ea3e22995f7f	bASV222	d__Bacteria; p__Actinobacteriota; c__Thermoleophilia; o__Gaiellales; f__uncultured; g__uncultured	GTAGTCCACGCCGTAAACGATGGGTGCTAGGTGTGGGGGGTGTCGACTCCCTCCGTGCCGAAGCTAACGCATTAAGCACCCCGCCTGGGGAGTACGGCCGCAAGGCTAAAACTCAAAGGAATTGACGGGGGCCCGCACAAGCAGCGGAGCATGTGGTTTAATTCGACGCAACGCGAAGAACCTTACCTAGGCTTGACATGCACGGGAATGTCGTAGAAATACGGCAGCCCTTCGGGGCTCGTGCACAGGTGTTGCATGGCTGTCGTCAGCTCGTGTCGTGAGATGTTGGGTTAAGTCCCGCAACGA	114	0	125	1592	0	465	343	2475	993	1005	518	66	1097	346	135	0	2633	2289	513	403	1169	1165	535	0	1120	1477	209	176	538	0	139	80	549	678	72	470	0	0	110	187	236	217	283	578	108	290
746d4351e28b1fcce75c4b4d040099a5	bASV223	d__Bacteria; p__Proteobacteria; c__Alphaproteobacteria; o__Reyranellales; f__Reyranellaceae; g__Reyranella	GTAGTCCACGCCGTAAACGATGGGTGCTAGACGTTGGCGAGCTTGCTCGTCAGTGTCGCAGCTAACGCGTTAAGCACCCCGCCTGGGGAGTACGGCCGCAAGGTTGAAACTCAAAGGAATTGACGGGGGCCCGCACAAGCGGTGGAGCATGTGGTTCAATTCGACGCAACGCGAAGAACCTTACCAGCCCTTGACATGTGACTCGCCGGGAGCAGAGACGCTCCCTTCGGTTCGGCCGGAGTCAACACAGGTGCTGCATGGCTGTCGTCAGCTCGTGTCGTGAGATGTTGGGTTAAGTCCCGCAAC	28	0	23	509	1834	512	147	722	212	234	140	0	1763	79	0	0	515	1020	158	193	282	639	805	564	312	440	118	118	864	0	77	24	210	113	0	180	372	107	0	0	0	220	47	80	0	98
04f3a7ad0de4bd9a2d4f77bcd3c4fc69	bASV224	d__Bacteria; p__Verrucomicrobiota; c__Verrucomicrobiae; o__Pedosphaerales; f__Pedosphaeraceae; g__ADurb.Bin063-1	GTAGTCCTAGCCGTAAACGGTGCACGTTTGCTGTAAAAGGAATCGACCCCTTTTGTGGCGTAGCCAACGCGTTAAACGTGCCGCCTGGGAAGTACGGTCGCAAGATTAAAACTCAAAGAAATTGACGGGGGCCTGCACAAGCGGTGGAGTATGTGGCTCAATTCGATGCAACGCGAAGAACCTTACCTGGCCTTGACATGTACGTAGTAGAAGGGTGAAAGCCTGACGAGGTAGCAATACCAGCGTACACAGGTGCTGCATGGCTGTCGTCAGCTCGTGTCGTGAGATGTTGGGTTAAGTCCCGCA	147	0	0	960	1372	874	116	755	395	90	0	50	1046	319	0	0	839	489	184	248	246	278	1051	219	219	0	142	147	284	471	236	339	177	224	88	1055	153	129	0	41	51	92	148	224	83	73
02bc0a70e286761ac6275a178025fc00	bASV225	d__Bacteria; p__Proteobacteria; c__Alphaproteobacteria; o__Rhizobiales; f__Xanthobacteraceae; g__Bradyrhizobium	GTAGTCCACGCCGTAAACGATGAATGCCAGCCGTTAGTGGGTTTACTCACTAGTGGCGCAGCTAACGCTTTAAGCATTCCGCCTGGGGAGTACGGTCGCAAGATTAAAACTCAAAGGAATTGACGGGGGCCCGCACAAGCGGTGGAGCATGTGGTTTAATTCGACGCAACGCGCAGAACCTTACCAGCCCTTGACATGTCCGGGACCGGTCGCAGAGATGTGACCTTCTCTTCGGAGCCCGGAACACAGGTGCTGCATGGCTGTCGTCAGCTCGTGTCGTGAGATGTTGGGTTAAGTCCCGCAACG	0	0	0	0	1227	185	177	0	0	0	0	0	315	0	0	0	0	0	187	377	0	754	302	188	0	0	0	0	0	0	0	0	0	0	0	0	74	0	0	0	0	0	0	0	0	0
38c5fa4bcfab6d0c28f188ba5037a6e3	bASV226	d__Bacteria; p__Proteobacteria; c__Gammaproteobacteria; o__Xanthomonadales; f__Xanthomonadaceae; g__Stenotrophomonas	GTAGTCCACGCCCTAAACGATGCGAACTGGATGTTGGGTGCAATTTGGCACGCAGTATCGAAGCTAACGCGTTAAGTTCGCCGCCTGGGGAGTACGGTCGCAAGACTGAAACTCAAAGGAATTGACGGGGGCCCGCACAAGCGGTGGAGTATGTGGTTTAATTCGATGCAACGCGAAGAACCTTACCTGGCCTTGACATGTCGAGAACTTTCCAGAGATGGATGGGTGCCTTCGGGAACTCGAACACAGGTGCTGCATGGCTGTCGTCAGCTCGTGTCGTGAGATGTTGGGTTAAGTCCCGCAACG	0	0	0	0	0	0	0	0	0	0	0	0	69	0	0	0	0	0	0	3781	0	0	145	0	0	0	0	0	0	0	0	0	0	0	0	0	0	0	0	0	0	0	0	0	0	0
16ab4a0438833d298afcbe162fd62721	bASV227	d__Bacteria; p__Proteobacteria; c__Gammaproteobacteria; o__Burkholderiales; f__Oxalobacteraceae; g__Herbaspirillum	GTAGTCCACGCCCTAAACGATGTCTACTAGTTGTCGGGTCTTAATTGACTTGGTAACGCAGCTAACGCGTGAAGTAGACCGCCTGGGGAGTACGGTCGCAAGATTAAAACTCAAAGGAATTGACGGGGACCCGCACAAGCGGTGGATGATGTGGATTAATTCGATGCAACGCGAAAAACCTTACCTACCCTTGACATGGATGGAATCCCGAAGAGATTTGGGAGTGCTCGAAAGAGAACCATCACACAGGTGCTGCATGGCTGTCGTCAGCTCGTGTCGTGAGATGTTGGGTTAAGTCCCGCAACG	0	0	0	0	0	0	0	0	0	0	122	0	28	0	46	0	0	0	0	0	0	0	0	11	0	0	0	0	0	0	0	0	0	0	0	0	199	0	0	0	0	0	0	0	0	0
c3e608650ca4be8687c6589f54002feb	bASV228	d__Bacteria; p__Acidobacteriota; c__Acidobacteriae; o__Subgroup_2; f__Subgroup_2; g__Subgroup_2; s__uncultured_Acidobacteria	GTAGTCCTAGCCCTAAACGATCAGGACTTGGGGTGCCACCCGTTCGGGTGTCGTCCCGGAGCTAACGCGTTAAGTCCTGCACCTGGGGAGTACGGTCGCAAGACTGAAACTCAAAGGAATTGACGGGGGCCCGCACAAGCGGTGGAACATGTGGTTCAATTCGACGCTACGCGAGGAACCTTACCTGGGCTCGAAATGCTAGTGACCAGCTGTAGAAATATGGCCTTCCCGCAAGGGACACTAGTATAGGCGCTGCATGGCTGTCGTCAGCTCGTGCCGTGAGGTGTTGGGTTAAGTCCCGCAACG	0	0	0	628	2024	936	0	1098	238	0	158	0	3674	160	0	0	0	696	0	215	390	0	5150	828	437	0	307	190	410	0	688	79	0	175	0	1514	558	0	0	0	0	0	0	59	0	57
de5177f537ce43b4f90b51bd410acbff	bASV229	d__Bacteria; p__Proteobacteria; c__Alphaproteobacteria; o__Rhizobiales; f__Xanthobacteraceae; g__Rhodoplanes	GTAGTCCACGCCGTAAACGATGGATGCTAGCCGTTGGTGGGTTTACCCTTCAGTGGCGCAGCTAACGCATTAAGCATCCCGCCTGGGGAGTACGGTCGCAAGATTAAAACTCAAAGGAATTGACGGGGGCCCGCACAAGCGGTGGAGCATGTGGTTCAATTCGAAGCAACGCGCAGAACCTTACCAGCCCTTGACATGGCAGGACGGTTCCCAGAGATGGGTTCCTTCTCGCAAGAGACTTGCACACAGGTGCTGCATGGCTGTCGTCAGCTCGTGTCGTGAGATGTTGGGTTAAGTCCCGCAACG	0	0	0	778	1945	2493	250	1082	488	376	166	0	1272	197	26	0	762	1191	292	181	427	481	2790	342	585	293	341	226	969	251	158	217	303	259	29	623	237	75	28	34	35	115	224	460	0	156
3cbe8a311a98baaf15fe7cdc00f317e8	bASV230	d__Bacteria; p__Proteobacteria; c__Alphaproteobacteria; o__Dongiales; f__Dongiaceae; g__Dongia	GTAGTCCACGCCGTAAACGATGAATGCTAGACGCTGGGGAGCATGCTCTTCGGTGTCGCAGCTAACGCATTAAGCATTCCGCCTGGGGAGTACGGTCGCAAGATTAAAACTCAAAGGAATTGACGGGGGCCCGCACAAGCGGTGGAGCATGTGGTTTAATTCGAAGCAACGCGCAGAACCTTACCAACCCTTGACATGGGAAGTATGGGCTTCAGAGATGAGGTCCTTCAGTTCGGCTGGCTTCCACACAGGTGCTGCATGGCTGTCGTCAGCTCGTGTCGTGAGATGTTGGGTTAAGTCCCGCAA	76	19	94	455	370	121	76	633	302	782	90	48	326	158	240	0	1037	175	78	139	251	520	465	48	361	374	115	67	494	151	145	135	162	73	676	526	32	0	58	208	37	1166	1117	1706	898	251
f70663b05049c13b6f4f496d86252d65	bASV231	d__Bacteria; p__Proteobacteria; c__Alphaproteobacteria; o__Rhizobiales; f__Xanthobacteraceae; g__uncultured	GTAGTCCACGCCGTAAACGATGGATGCTAGCCGTTGGTGGGTTTACCCTTCAGTGGCGCAGCTAACGCATTAAGCATCCCGCCTGGGGAGTACGGTCGCAAGATTAAAACTCAAAGGAATTGACGGGGGCCCGCACAAGCGGTGGAGCATGTGGTTCAATTCGAAGCAACGCGAAGAACCTTACCAGCTTTTGACATCCCGGTCGCGAGCACCAGAGATGGAGCTCTTCAGTTCGGCTGGACCGGAGACAGGTGCTGCATGGCTGTCGTCAGCTCGTGTCGTGAGATGTTGGGTTAAGTCCCGCAA	0	0	0	0	0	0	0	0	0	0	0	0	0	0	0	0	0	0	0	0	0	0	0	0	0	0	0	0	0	0	0	0	0	0	0	0	0	0	0	0	0	0	0	0	0	0
3d2c8e95c7b09166dbfdc5bc3fa3e427	bASV232	d__Bacteria; p__Proteobacteria; c__Gammaproteobacteria; o__Enterobacterales; f__Enterobacteriaceae	GTAGTCCACGCCGTAAACGATGTCGATTTGGAGGTTGTGCCCTTGAGGCGTGGCTTCCGGAGCTAACGCGTTAAATCGACCGCCTGGGGAGTACGGCCGCAAGGTTAAAACTCAAATGAATTGACGGGGGCCCGCACAAGCGGTGGAGCATGTGGTTTAATTCGATGCAACGCGAAGAACCTTACCTGGTCTTGACATCCACAGAACTTAGCAGAGATGCTTTGGTGCCTTCGGGAACTGTGAGACAGGTGCTGCATGGCTGTCGTCAGCTCGTGTTGTGAAATGTTGGGTTAAGTCCCGCAACGA	0	0	1878	0	0	0	0	0	0	0	0	0	0	0	0	0	0	0	0	0	0	0	0	0	0	0	0	0	0	0	0	0	0	0	0	0	0	0	0	0	0	0	0	0	0	0
5973de80a5583c1c669af6b058ebcab6	bASV233	d__Bacteria; p__Proteobacteria; c__Alphaproteobacteria; o__Rhizobiales; f__Xanthobacteraceae; g__uncultured; s__uncultured_forest	GTAGTCCACGCTGTAAACGATGGATGCTAGCCGTTGTCGGGTTTACTCGTCAGTGGCGCAGCTAACGCATTAAGCATCCCGCCTGGGGAGTACGGTCGCAAGATTAAAACTCAAAGGAATTGACGGGGGCCCGCACAAGCGGTGGAGCATGTGGTTCAATTCGAAGCAACGCGCAGAACCTTACCAGCCCTTGACATGTCCCGTATGAGTACCAGAGATGGAACTCTTCAGTTCGGCTGGCGGGAACACAGGTGCTGCATGGCTGTCGTCAGCTCGTGTCGTGAGATGTTGGGTTAAGTCCCGCAA	0	0	0	434	1232	534	483	366	174	96	82	0	743	179	0	0	0	642	448	538	318	485	940	508	192	194	123	0	390	0	134	0	0	234	0	0	222	193	0	0	0	0	0	64	0	74
4ad97d9c7ef5f7a201f5012614bfbe86	bASV234	d__Bacteria; p__Firmicutes; c__Bacilli; o__Bacillales; f__Bacillaceae; g__Bacillus	GTAGTCCACGCCGTAAACGATGAGTGCTAAGTGTTAGAGGGTTTCCGCCCTTTAGTGCTGCAGCTAACGCATTAAGCACTCCGCCTGGGGAGTACGGCCGCAAGGCTGAAACTCAAAGGAATTGACGGGGGCCCGCACAAGCGGTGGAGCATGTGGTTTAATTCGAAGCAACGCGAAGAACCTTACCAGGTCTTGACATCCTCTGACAACCCTAGAGATAGGGCGTTCCCCTTCGGGGGACAGAGTGACAGGTGGTGCATGGTTGTCGTCAGCTCGTGTCGTGAGATGTTGGGTTAAGTCCCGCAA	167	0	115	1851	0	275	428	1836	1999	450	0	62	1126	330	203	0	0	464	573	1795	2581	590	0	0	4509	0	0	0	0	0	0	0	0	205	0	0	0	0	0	0	0	0	0	0	1786	213
011e6fcc11d5e929113b27a2b73d618d	bASV235	d__Bacteria; p__Proteobacteria; c__Gammaproteobacteria; o__Pseudomonadales; f__Pseudomonadaceae; g__Pseudomonas; s__Pseudomonas_cichorii	GTAGTCCACGCCGTAAACGATGTCAACTAGCCGTTGGAATCCTTGAGATTTTAGTGGCGCAGCTAACGCATTAAGTTGACCGCCTGGGGAGTACGGCCGCAAGGTTAAAACTCAAATGAATTGACGGGGGCCCGCACAAGCGGTGGAGCATGTGGTTTAATTCGAAGCAACGCGAAGAACCTTACCAGGCCTTGACATCCAGTGAACTTACCAGAGATGGTTTGGTGCCTTCGGGAACACTGAGACAGGTGCTGCATGGCTGTCGTCAGCTCGTGTCGTGAGATGTTGGGTTAAGTCCCGTAACGA	0	0	0	0	0	0	0	94	0	0	0	0	36	0	0	0	0	0	0	0	0	46	40	0	0	0	0	0	0	0	0	0	0	0	0	0	0	0	0	21	0	0	0	0	0	0
5ec6fb09296a45407261a91a849f2194	bASV236	d__Bacteria; p__Proteobacteria; c__Alphaproteobacteria; o__Rhizobiales; f__Xanthobacteraceae; g__uncultured	GTAGTCCACGCCGTAAACGATGGATGCTAGCCGTTGGTGGGTTTACCCTTCAGTGGCGCAGCTAACGCATTAAGCATCCCGCCTGGGGAGTACGGTCGCAAGATTAAAACTCAAAGGAATTGACGGGGGCCCGCACAAGCGGTGGAGCATGTGGTTCAATTCGAAGCAACGCGCAGAACCTTACCAGCTTTTGACATCCCGGTCGCGAGCACCAGAGATGGAGCTCTTCAGTTCGGCTGGACCGGAGACAGGTGCTGCATGGCTGTCGTCAGCTCGTGTCGTGAGATGTTGGGTTAAGTCCCGCAA	56	0	0	839	1042	1122	224	802	577	152	0	58	1362	183	0	0	643	484	320	98	521	485	1024	273	402	0	211	108	1243	752	602	1365	0	0	83	455	298	243	396	237	330	188	299	669	176	870
59bb324cbabeb11bfcfbff1341037581	bASV237	d__Bacteria; p__Acidobacteriota; c__Acidobacteriae; o__Solibacterales; f__Solibacteraceae; g__Candidatus_Solibacter; s__uncultured_soil	GTAGTCCACGCCCTAAACGATGCATATTTGGTGTGGGTCATTCAGTTGATCCGTGCCGGAGCTAACGCGTTAAATATGCCGCCTGGGGAGTACAGTCGCAAGGCTGAAACTCAAAGGAATTGACGGGGGCCCGCACAAGCGGTGGAGCATGTGGTTCAATTCGACGCAACGCGAAGAACCTTACCTGGGCTCGAACGGCTGGTTACCGGCGGTGGAAACATCGCTACCCCGCAAGGGGGTCCAGTCGAGGTGCTGCATGGCTGTCGTCAGCTCGTGTCGTGAGATGTTGGGTTAAGTCCCGCAACG	0	0	0	0	0	62	0	0	0	0	0	0	0	0	0	0	0	0	0	0	0	0	210	154	0	0	0	0	0	0	0	0	0	0	0	0	39	31	0	0	0	0	0	0	0	0
d13c0dfd7a250e98488927ee0721c7a3	bASV238	d__Bacteria; p__Proteobacteria; c__Gammaproteobacteria; o__Burkholderiales; f__Burkholderiaceae; g__Burkholderia-Caballeronia-Paraburkholderia	GTAGTCCACGCCCTAAACGATGTCAACTAGTTGTCGGGTCTTCATTGACTTGGTAACGTAGCTAACGCGTGAAGTTGACCGCCTGGGGAGTACGGTCGCAAGATTAAAACTCAAAGGAATTGACGGGGACCCGCACAAGCGGTGGATGATGTGGATTAATTCGATGCAACGCGAAAAACCTTACCTACCCTTGACATGTATGGAATCCTGCTGAGAGGTGGGAGTGCCCGAAAGGGAGCCATAACACAGGTGCTGCATGGCTGTCGTCAGCTCGTGTCGTGAGATGTTGGGTTAAGTCCCGCAACG	0	0	0	43	0	80	0	94	0	129	0	0	0	0	0	0	676	91	114	63	157	0	0	0	107	0	0	0	0	0	0	0	51	0	60	0	150	271	0	0	0	0	0	0	18	0
8ff3c9abfe89727549304b7cf3ae3473	bASV239	d__Bacteria; p__Proteobacteria; c__Alphaproteobacteria; o__Rhizobiales; f__Xanthobacteraceae; g__uncultured	GTAGTCCACGCTGTAAACGATGGATGCTAGCCGTTGGCAGGTTCACCTGTCAGTGGCGCAGCTAACGCTTTAAGCATCCCGCCTGGGGAGTACGGTCGCAAGATTAAAACTCAAAGGAATTGACGGGGGCCCGCACAAGCGGTGGAGCATGTGGTTCAATTCGAAGCAACGCGCAGAACCTTACCAGCCCTTGACATCCCGGTCGCGGAGAGCAGAGACGCACTCCTTCAGTTCGGCTGGACCGGAGACAGGTGCTGCATGGCTGTCGTCAGCTCGTGTCGTGAGATGTTGGGTTAAGTCCCGCAA	0	0	0	2512	0	2320	490	3456	1323	1992	783	0	2483	785	150	0	1101	6773	642	658	2038	2347	0	23	1820	798	67	65	284	0	0	0	1097	1538	0	0	0	0	0	0	0	52	58	92	0	263
5ce18f265656217d74e973d8126ef4d7	bASV240	d__Bacteria; p__Actinobacteriota; c__Actinobacteria; o__Propionibacteriales; f__Nocardioidaceae; g__Nocardioides	GTAGTCCACACCGTAAACGTTGGGCGCTAGGTGTGGGATCCATTCCACGGGTTCCGTGCCGCAGCTAACGCATTAAGCGCCCCGCCTGGGGAGTACGGCCGCAAGGCTAAAACTCAAAGGAATTGACGGGGGCCCGCACAAGCGGCGGAGCATGCGGATTAATTCGATGCAACGCGAAGAACCTTACCTGGGTTTGACATATGCCGGAAAGCTCCAGAGATGGAGCCCCTTTTGTCGGTATACAGGTGGTGCATGGCTGTCGTCAGCTCGTGTCGTGAGATGTTGGGTTAAGTCCCGCAACGAGCG	325	126	310	463	488	270	168	750	202	773	274	121	427	398	405	73	1500	1033	215	202	407	643	970	87	341	933	484	484	728	0	135	128	309	378	329	1019	32	0	208	505	642	987	898	1329	191	275
0dcf3c1540a082920cbb6fc5ef32668a	bASV241	d__Bacteria; p__Proteobacteria; c__Gammaproteobacteria; o__Burkholderiales; f__Comamonadaceae	GTAGTCCACGCCCTAAACGATGTCAACTGGTTGTTGGGAGGGTTTCTTCTCAGTAACGTAGCTAACGCGTGAAGTTGACCGCCTGGGGAGTACGGCCGCAAGGTTGAAACTCAAAGGAATTGACGGGGACCCGCACAAGCGGTGGATGATGTGGTTTAATTCGATGCAACGCGAAAAACCTTACCTACCCTTGACATGCCAGGAATCCTGCAGAGATGTGGGAGTGCTCGAAAGAGAACCTGGACACAGGTGCTGCATGGCCGTCGTCAGCTCGTGTCGTGAGATGTTGGGTTAAGTCCCGCAACG	69	131	0	194	0	0	0	86	0	153	0	0	0	164	0	0	0	59	0	0	112	88	0	56	101	0	0	0	27	0	0	54	0	0	0	0	86	0	0	0	51	0	67	58	754	0
abb47a96712d10be41f6f3246eb56cb1	bASV242	d__Bacteria; p__Proteobacteria; c__Alphaproteobacteria; o__Rhizobiales; f__Beijerinckiaceae; g__Roseiarcus; s__uncultured_bacterium	GTAGTCCACGCTGTAAACGATGGATGCTAGCCGTTGGGGAGCTTGCTCTTCAGTGGCGCAGCTAACGCTTTAAGCATCCCGCCTGGGGAGTACGGTCGCAAGATTAAAACTCAAAGGAATTGACGGGGGCCCGCACAAGCGGTGGAGCATGTGGTTTAATTCGAAGCAACGCGCAGAACCTTACCAGCTTTTGACATGTCCTGGACGGATTGCAGAGATGCGATCTTCCCTTCGGGGCCGGGAACACAGGTGCTGCATGGCTGTCGTCAGCTCGTGTCGTGAGATGTTGGGTTAAGTCCCGCAACG	0	0	0	68	716	529	149	0	26	0	0	0	227	131	0	0	362	48	174	94	143	182	269	120	89	0	0	0	0	0	0	0	0	0	0	0	0	0	0	0	0	0	0	0	0	0
319b65dc3bc4c4275878e02a903d9bbb	bASV243	d__Bacteria; p__Proteobacteria; c__Alphaproteobacteria; o__Rhizobiales; f__Rhizobiaceae; g__Shinella	GTAGTCCACGCCGTAAACGATGAATGTTAGCCGTCGGCATGCATGCATGTCGGTGGCGCAGCTAACGCATTAAACATTCCGCCTGGGGAGTACGGTCGCAAGATTAAAACTCAAAGGAATTGACGGGGGCCCGCACAAGCGGTGGAGCATGTGGTTTAATTCGAAGCAACGCGCAGAACCTTACCAGCCCTTGACATCCCGATCGCGGTTAGTGGAGACACTTTCCTTCAGTTCGGCTGGATCGGAGACAGGTGCTGCATGGCTGTCGTCAGCTCGTGTCGTGAGATGTTGGGTTAAGTCCCGCAA	319	383	270	0	0	78	0	350	0	213	169	122	0	98	227	30	451	0	0	0	0	58	260	49	0	0	139	139	504	0	81	138	0	0	271	224	50	0	117	322	183	191	185	384	1182	0
35a788503aa247ca0bb1a6fdd928dba4	bASV244	d__Bacteria; p__Proteobacteria; c__Gammaproteobacteria; o__Xanthomonadales; f__Xanthomonadaceae; g__Pseudoxanthomonas	GTAGTCCACGCCCTAAACGATGCGAACTGGATGTTGGGTGCAACTTGGCACCCAGTATCGAAGCTAACGCGTTAAGTTCGCCGCCTGGGGAGTACGGTCGCAAGACTGAAACTCAAAGGAATTGACGGGGGCCCGCACAAGCGGTGGAGTATGTGGTTTAATTCGATGCAACGCGAAGAACCTTACCTGGTCTTGACATCCACGGAACTTTCCAGAGATGGATTGGTGCCTTCGGGAACCGTGAGACAGGTGCTGCATGGCTGTCGTCAGCTCGTGTCGTGAGATGTTGGGTTAAGTCCCGCAACG	468	104	467	0	0	147	0	254	39	62	56	343	48	108	303	0	0	56	0	153	65	139	0	30	122	0	21	0	0	0	0	51	116	0	71	0	0	0	0	0	0	0	0	0	336	0
7fecb9dfa7278579c9407f3ce37e9290	bASV245	d__Bacteria; p__Proteobacteria; c__Alphaproteobacteria; o__Rhizobiales; f__Rhizobiaceae; g__Allorhizobium-Neorhizobium-Pararhizobium-Rhizobium	GTAGTCCACGCCGTAAACGATGAATGTTAGCCGTCGGGCAGTATACTGTTCGGTGGCGCAGCTAACGCATTAAACATTCCGCCTGGGGAGTACGGTCGCAAGATTAAAACTCAAAGGAATTGACGGGGGCCCGCACAAGCGGTGGAGCATGTGGTTTAATTCGAAGCAACGCGCAGAACCTTACCAGCCCTTGACATGCCCGGCCAGCTACAGAGATGTAGTGTTCCCTTCGGGGACCGGGACACAGGTGCTGCATGGCTGTCGTCAGCTCGTGTCGTGAGATGTTGGGTTAAGTCCCGCAACGAG	173	146	146	358	0	219	0	344	286	181	194	79	143	83	1561	0	0	695	0	508	1501	0	0	0	1675	0	0	0	0	416	130	276	203	249	120	0	0	0	20	74	40	0	207	0	1671	1204
0e5a85404aefd5e65cf453355ff29427	bASV246	d__Bacteria; p__Verrucomicrobiota; c__Verrucomicrobiae; o__Pedosphaerales; f__Pedosphaeraceae; g__ADurb.Bin063-1	GTAGTCCTAGCCGTAAACGGTGCACGTTTGCTGTAAAAGGAATCGACCCCTTTTGTGGCGTAGCTAACGCGTTAAACGTGCCGCCTGGGAAGTACGGTCGCAAGATTAAAACTCAAAGAAATTGACGGGGGCCTGCACAAGCGGTGGAGTATGTGGCTCAATTCGATGCAACGCGAAGAACCTTACCTGGCCTTGACATGCATATAGTAGAAGGGTGAAAGCCTGACGAGGTAGCAATACCAGTATGCACAGGTGCTGCATGGCTGTCGTCAGCTCGTGTCGTGAGATGTTGGGTTAAGTCCCGCA	1040	233	323	165	845	595	0	250	92	149	0	233	935	329	289	0	0	503	0	0	0	165	459	66	194	0	515	356	1631	1553	484	1317	138	189	483	595	0	0	137	405	200	0	158	194	625	208
a7113986bfb98dfaaf9747df492313d8	bASV247	d__Bacteria; p__Proteobacteria; c__Gammaproteobacteria; o__Burkholderiales; f__Burkholderiaceae; g__Burkholderia-Caballeronia-Paraburkholderia	GTAGTCCACGCCCTAAACGATGTCAACTAGTTGTCGGGTCTTCATTGACTTGGTAACGAAGCTAACGCGTGAAGTTGACCGCCTGGGGAGTACGGTCGCAAGATTAAAACTCAAAGGAATTGACGGGGACCCGCACAAGCGGTGGATGATGTGGATTAATTCGATGCAACGCGAAAAACCTTACCTACCCTTGACATGTACGGAATCCTGCTGAGAGGTGGGAGTGCCCGAAAGGGAGCCGTAACACAGGTGCTGCATGGCTGTCGTCAGCTCGTGTCGTGAGATGTTGGGTTAAGTCCCGCAACG	0	0	0	0	0	0	0	0	0	0	0	0	0	0	0	0	0	0	0	0	0	146	986	476	0	0	46	94	96	0	0	0	0	0	0	0	959	233	0	0	0	0	0	0	0	0
8695f8d25876910e2ff12aa47b079c7f	bASV248	d__Bacteria; p__Bacteroidota; c__Bacteroidia; o__Flavobacteriales; f__Flavobacteriaceae; g__Flavobacterium; s__Flavobacterium_johnsoniae	GTAGTCCACGCCGTAAACGATGGATACTAGCTGTTGGGCGCAAGTTCAGTGGCTAAGCGAAAGTGATAAGTATCCCACCTGGGGAGTACGAACGCAAGTTTGAAACTCAAAGGAATTGACGGGGGCCCGCACAAGCGGTGGAGCATGTGGTTTAATTCGATGATACGCGAGGAACCTTACCAAGGCTTAAATGCAGACTGACCGATTTGGAAACAGATCTTTCGCAAGACAGTTTACAAGGTGCTGCATGGTTGTCGTCAGCTCGTGCCGTGAGGTGTCAGGTTAAGTCCTATAACGAGCGCAACC	39	494	221	0	0	55	0	77	0	0	0	31	0	109	289	32	0	0	0	48	0	140	0	32	0	0	37	179	39	0	43	24	0	0	32	0	0	0	0	0	0	0	0	0	139	29
ce7546b72c48aa99de36d81d8d568d76	bASV249	d__Bacteria; p__Actinobacteriota; c__Actinobacteria; o__Propionibacteriales; f__Nocardioidaceae; g__Nocardioides	GTAGTCCACACCGTAAACGTTGGGCGCTAGGTGTGGGATCCATTCCACGGGTTCCGTGCCGTAGCTAACGCATTAAGCGCCCCGCCTGGGGAGTACGGCCGCAAGGCTAAAACTCAAAGGAATTGACGGGGGCCCGCACAAGCGGCGGAGCATGCGGATTAATTCGATGCAACGCGAAGAACCTTACCTGGGTTTGACATACACCGGAAAGCTGCAGAGATGTGGCCCCTTTTTGTCGGTGTACAGGTGGTGCATGGCTGTCGTCAGCTCGTGTCGTGAGATGTTGGGTTAAGTCCCGCAACGAGC	2541	316	730	88	0	89	0	143	52	298	140	488	24	99	268	0	0	252	0	44	91	197	333	0	103	470	97	230	575	650	161	174	0	0	438	1443	0	0	448	757	1525	424	564	856	48	133
dd88998a73bdbd8c804ac667e2ccb623	bASV250	d__Bacteria; p__Proteobacteria; c__Alphaproteobacteria; o__Rhizobiales; f__Rhizobiaceae; g__Mesorhizobium	GTAGTCCACGCCGTAAACGATGGAAGCCAGCTGTCGGCAAGTTTACTTGTCGGTGGCGCAGCTAACGCATTAAGCTTCCCGCCTGGGGAGTACGGTCGCAAGATTAAAACTCAAAGGAATTGACGGGGGCCCGCACAAGCGGTGGAGCATGTGGTTTAATTCGAAGCAACGCGCAGAACCTTACCAGCCCTTGACATCCCGGTCGCGGTTACGAGAGATCGTATCCTTCAGTTCGGCTGGACCGGTGACAGGTGCTGCATGGCTGTCGTCAGCTCGTGTCGTGAGATGTTGGGTTAAGTCCCGCAA	431	254	433	158	431	303	47	293	78	496	359	180	64	498	451	0	432	544	80	181	235	462	105	31	240	534	69	72	325	498	160	141	185	118	421	205	22	0	72	282	124	163	137	234	394	97
ac2e479a060392d35794302064a8bf1a	bASV251	d__Bacteria; p__Proteobacteria; c__Alphaproteobacteria; o__Rhizobiales; f__KF-JG30-B3; g__KF-JG30-B3	GTAGTCCACGCCGTAAACGATGGATGCTAGCCGTTGGTAAGCATGCTTATCAGTGGCGCAGCTAACGCATTAAGCGTCCCGCCTGGGGAGTACGGCCGCAAGGTTGAAACTCAAAGGAATTGACGGGGGCCCGCACAAGCGGTGGAGCATGTGGTTTAATTCGACGCAACGCGCAGAACCTTACCAGGGTTTGACATCCCGCGCTAAACTCAGAGATGGGTGGTCCCCGCAAGGGGCGCGGAGACAGGTGCTGCATGGCTGTCGTCAGCTCGTGTCGTGAGATGTTGGGTTAAGTCCCGCAACGAG	1394	129	375	780	105	233	152	1039	423	303	352	247	77	241	322	0	305	682	259	280	752	510	341	0	718	455	0	103	832	847	270	444	145	283	337	608	14	0	387	1558	582	94	181	369	574	134
00d4373f3f7db74e433ff21ef3e263cb	bASV252	d__Bacteria; p__Proteobacteria; c__Alphaproteobacteria; o__Rhizobiales; f__Rhizobiaceae	GTAGTCCACGCTGTAAACGATGGAAGCTAGCCGTCGGCAAGTTTACTTGTCGGTGGCGCAGCTAACGCATTAAGCTTCCCGCCTGGGGAGTACGGTCGCAAGATTAAAACTCAAAGGAATTGACGGGGGCCCGCACAAGCGGTGGAGCATGTGGTTTAATTCGAAGCAACGCGCAGAACCTTACCAGCCCTTGACATCCCGGTCGCGGTTTCCAGAGATGGAATCCTTCAGTTCGGCTGGACCGGTGACAGGTGCTGCATGGCTGTCGTCAGCTCGTGTCGTGAGATGTTGGGTTAAGTCCCGCAA	333	406	491	112	0	94	39	182	67	251	120	205	66	268	423	0	0	410	71	179	161	263	0	45	157	328	0	0	53	0	47	214	173	0	379	0	22	0	88	244	137	57	74	87	546	66
7791e14435ffdb4119c1b44138acc89d	bASV253	d__Bacteria; p__Actinobacteriota; c__Thermoleophilia; o__Solirubrobacterales; f__67-14; g__67-14; s__uncultured_Conexibacteraceae	GTAGTCCACGCCGTAAACGATGGGCACTAGGTGTGGGAGGTGTCGACTCCTCCCGTGCCGGCGCTAACGCATTAAGTGCCCCGCCTGGGGAGTACGGCCGCAAGGCTAAAACTCAAAGGAATTGACGGGGGCCCGCACAAGCAGCGGAGCATGTGGTTTAATTCGATGCAACGCGAAGAACCTTACCTGGGCTTGACATGTAACTGACAGCCGTGGAAACACGGTCTTCCTTCGGGACAGTTACACAGGTGGTGCATGGCTGTCGTCAGCTCGTGTCGTGAGATGTTGGGTTAAGTCCCGCAACGA	0	0	57	1550	0	378	719	2146	842	689	478	0	673	324	148	0	2110	2829	876	550	1128	1302	5138	0	1098	0	145	137	480	0	29	22	577	751	0	901	69	17	159	209	291	275	452	559	472	120
69cb987b521f2552b2db8b29ddd8594e	bASV254	d__Bacteria; p__Proteobacteria; c__Gammaproteobacteria; o__Pseudomonadales; f__Pseudomonadaceae; g__Pseudomonas	GTAGTCCACGCCGTAAACGATGTCAACTAGCCGTTGGAATCCTTGAGATTTTAGTGGCGCAGCTAACGCATTAAGTTGACCGCCTGGGGAGTACGGCCGCAAGGTTAAAACTCAAATGAATTGACGGGGGCCCGCACAAGCGGTGGAGCATGTGGTTTAATTCGAAGCAACGCGAAGAACCTTACCAGGCCTTGACATGCAGAGAACTTTCTAGAGATAGATTGGTGCCTTCGGGAACTCTGACACAGGTGCTGCATGGCTGTCGTCAGCTCGTGTCGTGAGATGTTGGGTTAAGTCCCGTAACGA	0	0	154	0	0	0	0	103	0	0	0	0	51	0	141	0	0	182	0	0	78	118	0	0	231	0	0	0	0	0	0	0	0	0	753	0	0	0	0	0	0	0	0	0	207	0
04e32424d2c408838019fbd330609fcb	bASV256	d__Bacteria; p__Proteobacteria; c__Gammaproteobacteria; o__Burkholderiales; f__Comamonadaceae; g__Aquabacterium	GTAGTCCACGCCCTAAACGATGTCAACTGGTTGTTGGACGGCTTGCTGTTCAGTAACGAAGCTAACGCGTGAAGTTGACCGCCTGGGGAGTACGGCCGCAAGGTTGAAACTCAAAGGAATTGACGGGGACCCGCACAAGCGGTGGATGATGTGGTTTAATTCGATGCAACGCGAAAAACCTTACCTACCCTTGACATGTCAAGAATCTTGCAGAGATGTGAGAGTGCTCGAAAGAGAACTTGAACACAGGTGCTGCATGGCCGTCGTCAGCTCGTGTCGTGAGATGTTGGGTTAAGTCCCGCAACG	200	64	154	149	341	300	99	406	136	79	72	66	1509	945	302	0	577	709	395	283	303	453	267	172	498	408	107	89	352	586	143	377	211	102	131	219	38	0	82	188	223	18	19	28	419	89
6eadad784714219e6dbdba70f19a01c3	bASV257	d__Bacteria; p__Bacteroidota; c__Bacteroidia; o__Chitinophagales; f__Saprospiraceae; g__uncultured	GTAGTCCACGCCCTAAACGATGCTTACTCGACGTGCGAGGCTTGTCCTGGTGCGTCCAAGGGAAACCGTTAAGTAAGCCACCTGGGGAGTACGACCGCAAGGTTGAAACTCAAAGGAATTGACGGGGGTCCGCACAAGCGGTGGAGCATGTGGTTTAATTCGATGATACGCGAGGAACCTTACCTGGGCTAGAATGCGAGTGACAGGCCGCGAAAGCGGTCCTTCCTTCGGGACACAAAGCAAGGTGCTGCATGGCTGTCGTCAGCTCGTGCCGTGAGGTGTTGGGTTAAGTCCCGCAACGAGCGC	191	104	17	0	794	245	0	0	0	28	0	15	169	562	574	20	0	0	0	0	0	0	648	24	0	0	418	488	2261	757	261	379	0	0	304	552	123	6	79	169	151	359	250	482	75	143
efbdc5e189c9b9f6d7a5e7d3e078f645	bASV258	d__Bacteria; p__Firmicutes; c__Bacilli; o__Lactobacillales; f__Streptococcaceae; g__Lactococcus; s__Lactococcus_garvieae	GTAGTCCACGCCGTAAACGATGAGTGCTAGCTGTAGGGAGCTATAAGTTCTCTGTAGCGCAGCTAACGCATTAAGCACTCCGCCTGGGGAGTACGACCGCAAGGTTGAAACTCAAAGGAATTGACGGGGGCCCGCACAAGCGGTGGAGCATGTGGTTTAATTCGAAGCAACGCGAAGAACCTTACCAGGTCTTGACATACTCGTGCTATCCTTAGAGATAAGGAGTTCCTTCGGGACACGGGATACAGGTGGTGCATGGTTGTCGTCAGCTCGTGTCGTGAGATGTTGGGTTAAGTCCCGCAACGA	34	6	212	0	0	0	0	0	13	29	13	0	0	0	0	0	0	0	0	0	0	34	8	17	0	0	175	0	0	0	0	0	0	0	19	0	0	0	0	0	0	0	0	0	0	0
dde303e4965f097c0f7ff3dd25c7b415	bASV259	d__Bacteria; p__Proteobacteria; c__Gammaproteobacteria; o__Burkholderiales; f__Burkholderiaceae; g__Burkholderia-Caballeronia-Paraburkholderia	GTAGTCCACGCCCTAAACGATGTCAACTAGTTGTCGGGTCTTCATTGACTTGGTAACGTAGCTAACGCGTGAAGTTGACCGCCTGGGGAGTACGGTCGCAAGATTAAAACTCAAAGGAATTGACGGGGACCCGCACAAGCGGTGGATGATGTGGATTAATTCGATGCAACGCGAAAAACCTTACCTACCCTTGACATGTACGGAACCTTGCTGAGAGGTGAGGGTGCCCGAAAGGGAGCCGTAACACAGGTGCTGCATGGCTGTCGTCAGCTCGTGTCGTGAGATGTTGGGTTAAGTCCCGCAACG	12	0	0	0	2504	0	0	0	0	0	0	0	0	0	0	0	0	0	0	0	0	0	1128	365	225	0	0	0	155	0	0	0	0	0	47	0	6342	1000	0	0	0	0	0	0	0	0
8a3f7d252f3976799b37969bbc4c83c5	bASV260	d__Bacteria; p__Proteobacteria; c__Gammaproteobacteria; o__PLTA13; f__PLTA13; g__PLTA13	GTAGTCCACGCCCTAAACGATGACGACTGGATGTCGGAGGGGTCTGCCTTTCGGTGTCGTAGCTAACGCGTTAAGTCGTCCGCCTGGGGAGTACGGCCGCAAGGTTGAAACTCAAAGGAATTGACGGGGACCCGCACAAGCGGTGGAGCATGTGGTTCAATTCGATGCAACGCGAAGAACCTTACCTGGCCTTGACATCCGCGGAACTTGGCAGAAATGCCTTGGTGCCTTCGGGAATCGCGAGACAGGTGCTGCATGGCTGTCGTCAGCTCGTGTCGTGAGATGTTGGGTTAAGTCCCGCAACGA	711	137	332	0	0	149	0	180	146	394	490	233	0	466	222	0	0	964	0	385	883	293	0	0	1068	0	0	0	97	1340	448	1293	423	490	508	0	0	0	984	3474	1581	44	105	211	719	217
80f519878115490fb644740b02baf2a4	bASV261	d__Bacteria; p__Proteobacteria; c__Alphaproteobacteria; o__Rhizobiales; f__Beijerinckiaceae; g__Microvirga	GTAGTCCACGCCGTAAACGATGAATGCCAGCCGTTGGCGAGCTTGCTCGTCAGTGGCGCAGCTAACGCTTTAAGCATTCCGCCTGGGGAGTACGGTCGCAAGATTAAAACTCAAAGGAATTGACGGGGGCCCGCACAAGCGGTGGAGCATGTGGTTTAATTCGAAGCAACGCGCAGAACCTTACCAGCCTTTGACATGTCCGGTATGGACCCTGGAGACGGGGTTCTTCAGTTCGGCTGGCCGGAACACAGGTGCTGCATGGCTGTCGTCAGCTCGTGTCGTGAGATGTTGGGTTAAGTCCCGCAA	2638	397	1783	0	152	77	0	35	0	63	0	698	166	137	204	0	0	0	0	0	0	0	579	113	0	0	320	274	2082	813	397	414	0	0	864	655	232	41	268	873	385	321	390	781	107	52
805674e5e9713de2f188467a5ba81875	bASV262	d__Bacteria; p__Bacteroidota; c__Bacteroidia; o__Flavobacteriales; f__Flavobacteriaceae; g__Flavobacterium	GTAGTCCACGCCGTAAACGATGGATACTAGCTGTTCGAGAGCAATCTTGAGTGGCTAAGCGAAAGTGATAAGTATCCCACCTGGGGAGTACGAACGCAAGTTTGAAACTCAAAGGAATTGACGGGGGCCCGCACAAGCGGTGGAGCATGTGGTTTAATTCGATGATACGCGAGGAACCTTACCAAGGCTTAAATGTAGATTGACAGGACTGGAAACAGTTTTTTCTTCGGACAATTTACAAGGTGCTGCATGGTTGTCGTCAGCTCGTGCCGTGAGGTGTCAGGTTAAGTCCTATAACGAGCGCAA	463	119	244	0	0	0	0	0	0	0	0	105	0	179	575	0	0	0	0	0	0	0	1559	449	0	0	959	749	3926	1604	331	1040	0	0	508	528	24	0	89	172	179	250	892	410	107	0
7a8a29d705678743084e47e3f7e90905	bASV263	d__Bacteria; p__Actinobacteriota; c__Thermoleophilia; o__Gaiellales	GTAGTCCACGCCGTAAACGATGGGTGCTAGGTGTGGGCGGTGTCGACTCCGTCCGTGCCGAAGCTAACGCATTAAGCACCCCGCCTGGGGAGTACGGCCGCAAGGCTAAAACTCAAAGGAATTGACGGGGGCCCGCACAAGCAGCGGAGCATGTGGTTTAATTCGACGCGACGCGAAGAACCTTACCAAGGCTTGACATGTACCGGAATGTCGTAGAAATACGGCAGCCCTTCGGGGCCGGTACACAGGTGGTGCATGGCTGTCGTCAGCTCGTGCCGTGAGGTGTTGGGTTAAGTCCCGCAACGA	39	63	51	175	1622	346	0	321	88	123	0	44	1051	529	289	0	0	0	0	98	170	284	1270	194	121	0	769	426	2123	0	152	159	0	0	226	2288	0	0	172	273	353	845	957	1687	0	176
0d6a165da5df08d337514f137a471dfb	bASV264	d__Bacteria; p__Proteobacteria; c__Gammaproteobacteria; o__Burkholderiales; f__Comamonadaceae; g__Rhizobacter	GTAGTCCACGCCCTAAACGATGTCAACTGGTTGTTGGACGGCTTGCTGTTCAGTAACGAAGCTAACGCGTGAAGTTGACCGCCTGGGGAGTACGGCCGCAAGGTTGAAACTCAAAGGAATTGACGGGGACCCGCACAAGCGGTGGATGATGTGGTTTAATTCGATGCAACGCGAAAAACCTTACCTACCCTTGACATGTCTAGAAGTTACCAGAGATGGTTTCGTGCTCGAAAGAGAACTAGAACACAGGTGCTGCATGGCCGTCGTCAGCTCGTGTCGTGAGATGTTGGGTTAAGTCCCGCAACG	0	0	43	356	418	329	112	402	173	102	86	0	209	1806	67	0	500	1646	457	124	770	152	87	35	725	383	0	0	0	0	33	68	534	331	59	0	1390	495	0	0	0	0	24	0	0	349
69b824c16e82cf06d6716617f15e6c7f	bASV266	d__Bacteria; p__Gemmatimonadota; c__Gemmatimonadetes; o__Gemmatimonadales; f__Gemmatimonadaceae; g__uncultured	GTAGTCCACGCCGTAAACGATGGACACTAGGCGTCGGGGGGAGCGACCCTCCCGGTGCCGTCGCTAACGCAGTAAGTGTCCCGCCTGGGGAGTACGGCCGCAAGGCTGAAACTCAAAGGAATTGACGGGGGCCCGCACAAGCGGTGGAGCATGTGGTTTAATTCGAAGCAACGCGAAGAACCTTACCTGGGCTTGACATGCACGGGAAAGCCGGTGGAAACATCGGCCCCTCTTCGGAGTCCGTGCACAGGTGCTGCATGGCTGTCGTCAGCTCGTGTCGTGAGATGTTGGGTTAAGTCCCGCAAC	85	0	0	554	1004	481	562	695	606	94	150	70	179	186	0	0	0	1416	277	716	698	174	1633	48	590	684	81	58	233	709	373	608	216	245	69	846	165	0	208	249	396	432	419	467	0	436
f59d6cc25ddcf51548b1465b16d2367a	bASV267	d__Bacteria; p__Dadabacteria; c__Dadabacteriia; o__Dadabacteriales; f__Dadabacteriales; g__Dadabacteriales; s__uncultured_candidate	GTAGTCCACGCCCTAAACGTTGGATGCTAGGTGTGGGGATGAAAATCTCTGTGCCGAAGTTAACGCATTAAGCATCCCGCCTGGGGAGTACGGTCGCAAGATTGAAACTCAAAGGAATTGGCGGGGGCCCGCACAAGCGGTGGAGCATGTGGTTTAATTCGATGCTAAGCGAAGAACCTTACCAGGGCTTGACATACTGACTCAAGCTTATGTGAAAGCATGGAGTGGTGTGGAGCTTGCTTCACACAGTTAGTACAGGTGCTGCATGGCTGTCGTCAGCTCGTGCCGTGAGGTGTCCGGTTAAGT	540	60	241	959	0	304	0	396	665	0	363	244	574	77	142	0	64	246	0	15	115	0	0	0	73	0	0	0	35	2803	378	1089	76	198	430	0	0	0	14	42	0	0	0	0	17035	1753
8b665f0205f80dda8a69fd771c3bb94e	bASV268	d__Bacteria; p__Proteobacteria; c__Gammaproteobacteria; o__Enterobacterales; f__Enterobacteriaceae; g__Klebsiella	GTAGTCCACGCTGTAAACGATGTCGATTTGGAGGTTGTGCCCTTGAGGCGTGGCTTCCGGAGCTAACGCGTTAAATCGACCGCCTGGGGAGTACGGCCGCAAGGTTAAAACTCAAATGAATTGACGGGGGCCCGCACAAGCGGTGGAGCATGTGGTTTAATTCGATGCAACGCGAAGAACCTTACCTGGTCTTGACATCCACAGAACTTTCCAGAGATGGATTGGTGCCTTCGGGAACTGTGAGACAGGTGCTGCATGGCTGTCGTCAGCTCGTGTTGTGAAATGTTGGGTTAAGTCCCGCAACGA	309	558	1867	0	0	0	0	0	0	0	0	264	0	0	96	0	0	27	0	0	0	0	78	0	0	0	0	0	26	0	0	0	0	0	0	0	0	0	0	0	0	0	0	0	62	0
9179473c7b3c95da7f9126656cd4175d	bASV269	d__Bacteria; p__Proteobacteria; c__Alphaproteobacteria; o__Rhizobiales; f__Xanthobacteraceae; g__uncultured	GTAGTCCACGCCGTAAACGATGGATGCTAGCCGTTGGCGGGTTTACTCGTCAGTGGCGCAGCTAACGCTTTAAGCATCCCGCCTGGGGAGTACGGTCGCAAGATTAAAACTCAAAGGAATTGACGGGGGCCCGCACAAGCGGTGGAGCATGTGGTTCAATTCGAAGCAACGCGAAGAACCTTACCAGCCCTTGACATCCCGGTCGCGGGAACGAGAGATCGATCCCTTCAGTTCGGCTGGACCGGAGACAGGTGCTGCATGGCTGTCGTCAGCTCGTGTCGTGAGATGTTGGGTTAAGTCCCGCAA	0	0	0	826	0	1274	155	214	142	0	0	0	883	0	0	0	0	0	279	72	80	474	253	275	120	0	0	0	44	0	48	0	0	0	0	0	0	0	0	0	0	0	0	0	0	48
e667954a779325cf9f93339e8e4e85b4	bASV270	d__Bacteria; p__Bacteroidota; c__Bacteroidia; o__Flavobacteriales; f__Weeksellaceae; g__Chryseobacterium	GTAGTCCACGCCGTAAACGATGCTAACTCGTTTTTGGGTTTTCGGATTCAGAGACTAAGCGAAAGTGATAAGTTAGCCACCTGGGGAGTACGTTCGCAAGAATGAAACTCAAAGGAATTGACGGGGGCCCGCACAAGCGGTGGATTATGTGGTTTAATTCGATGATACGCGAGGAACCTTACCAAGGCTTAAATGGGAATTGATCGGTTTAGAAATAGACCTTCCTTCGGGCAATTTTCAAGGTGCTGCATGGTTGTCGTCAGCTCGTGCCGTGAGGTGTTAGGTTAAGTCCTGCAACGAGCGCAA	0	37	0	91	0	0	46	0	0	170	0	0	0	0	53	0	270	0	0	35	71	78	0	0	0	0	0	0	0	0	21	0	0	0	0	0	0	0	0	0	0	0	0	0	47	0
c7b8dd41d448e0d223f31b3600c93464	bASV271	d__Bacteria; p__Acidobacteriota; c__Acidobacteriae; o__Acidobacteriales; f__uncultured; g__uncultured	GTAGTCCTAGCCCTAAACGATGATTGCTTGGTGTAGCAGGTACCCAATCCTGCTGTGCCGCAGCTAACGCGATAAGCAATCCGCCTGGGGAGTACGGTCGCAAGGCTGAAACTCAAAGGAATTGACGGGGGCCCGCACAAGCGGTGGAGCATGTGGTTCAATTCGACGCAACGCGAAGAACCTTACCTGGGCTCGAAGCGCAGTGGAATCCGGTGGAAACATCGGCGCCCCTTAAAAGGCCGCTGCGGAGGTGCTGCATGGCTGTCGTCAGCTCGTGTCGTGAGATGTTGGGTTAAGTCCCGCAAC	0	0	0	69	354	120	0	0	18	0	0	0	24	15	0	0	0	0	0	9	0	0	896	2773	11	0	0	0	27	0	209	0	0	0	0	0	471	235	0	0	0	0	0	0	0	13
b8a85ffbb24f54ac6fa3b69b12e273df	bASV272	d__Bacteria; p__Proteobacteria; c__Alphaproteobacteria; o__Sphingomonadales; f__Sphingomonadaceae; g__Sphingomonas	GTAGTCCACGCCGTAAACGATGATGACTAGCTGTCGGGGCTCATGGAGTTTCGGTGGCGCAGCTAACGCGTTAAGTCATCCGCCTGGGGAGTACGGCCGCAAGGTTAAAACTCAAAGAAATTGACGGGGGCCTGCACAAGCGGTGGAGCATGTGGTTTAATTCGAAGCAACGCGCAGAACCTTACCAGCGTTTGACATGGTAGGACGGCTTCCAGAGATGGATTCCTTCCCTTACGGGACCTACACACAGGTGCTGCATGGCTGTCGTCAGCTCGTGTCGTGAGATGTTGGGTTAAGTCCCGCAAC	168	136	437	0	0	104	0	0	0	0	0	140	94	0	0	0	0	865	0	0	0	0	0	0	0	0	206	213	1539	0	288	454	164	0	917	0	0	0	153	501	370	553	898	1331	197	123
c7233cd8081e24a332e1d57bd8d95b6a	bASV273	d__Bacteria; p__Proteobacteria; c__Alphaproteobacteria; o__Rhizobiales; f__Xanthobacteraceae; g__uncultured	GTAGTCCACGCCGTAAACGATGGATGCTAGCCGTTGGTGGGTTTACCCATCAGTGGCGCAGCTAACGCATTAAGCATCCCGCCTGGGGAGTACGGTCGCAAGATTAAAACTCAAAGGAATTGACGGGGGCCCGCACAAGCGGTGGAGCATGTGGTTCAATTCGAAGCAACGCGAAGAACCTTACCAGCCTTTGACATCCCGGTCGCGAGCACCAGAGATGGAGCTCTTCAGTTCGGCTGGACCGGAGACAGGTGCTGCATGGCTGTCGTCAGCTCGTGTCGTGAGATGTTGGGTTAAGTCCCGCAA	0	0	0	471	589	113	211	808	247	110	0	0	694	0	0	0	0	417	307	147	0	258	217	92	0	0	105	0	309	0	0	0	0	0	0	0	55	0	0	0	0	131	119	272	484	126
6e148fe14e629c954df2937a9412edec	bASV274	d__Bacteria; p__Proteobacteria; c__Gammaproteobacteria; o__Burkholderiales; f__Nitrosomonadaceae; g__mle1-7; s__uncultured_beta	GTAGTCCACGCCCTAAACGATGTCAACTGGTTGTTGGGGAAGGCAACTTCCTTAGTAACGAAGCTAACGCGTGAAGTTGACCGCCTGGGGAGTACGGCCGCAAGGTTAAAACTCAAAGGAATTGACGGGGACCCGCACAAGCGGTGGATGATGTGGATTAATTCGATGCAACGCGAAGAACCTTACCTACCCTTGACATGTACCGAAGCCCGCTGAGAGGTGGGTGTGCCCGAAAGGGAGCGGTAACACAGGTGCTGCATGGCTGTCGTCAGCTCGTGTCGTGAGATGTTGGGTTAAGTCCCGCAA	422	140	364	79	0	194	97	174	56	357	272	249	128	418	458	0	0	901	147	167	284	397	125	57	197	0	240	180	1143	1003	446	713	219	154	580	0	0	0	156	428	352	54	100	204	420	182
01fdba46caec8f22a5c93c5f931d2ee2	bASV275	d__Bacteria; p__Actinobacteriota; c__Acidimicrobiia; o__Microtrichales; f__Ilumatobacteraceae; g__uncultured	GTAGTCCACGCCGTAAACGTTGGGCACTAGGTGTGGGTCTCAACCAACGAGATCCGCGCCGTCGCTAACGCATTAAGTGCCCCGCCTGGGGAGTACGGCCGCAAGGCTAAAACTCAAAGGAATTGACGGGGGCCCGCACAAGCAGCGGAGCGTGTTGCTTAATTCGATGTTACGCGAAGAACCTTACCTGGGTTTGACATGTAGGGAAAAGCTCTGGAGACAGGGTGTCCTAACGGGCCCTACACAGGTGGTGCATGGCTGTCGTCAGCTCGTGTCGTGAGATGTTGGGTTAAGTCCCGCAACGAG	327	75	147	679	423	245	132	1135	390	793	705	129	236	267	816	0	944	434	60	208	573	494	232	38	335	1087	160	210	522	628	148	142	291	326	372	924	80	0	279	803	765	304	362	528	271	190
f0818dbff0ad3cca65838732fbf487dd	bASV276	d__Bacteria; p__Proteobacteria; c__Gammaproteobacteria; o__Burkholderiales; f__Comamonadaceae; g__Pelomonas	GTAGTCCACGCCCTAAACGATGTCAACTGGTTGTTGGGAGGGTTTCTTCTCAGTAACGTAGCTAACGCGTGAAGTTGACCGCCTGGGGAGTACGGCCGCAAGGTTGAAACTCAAAGGAATTGACGGGGACCCGCACAAGCGGTGGATGATGTGGTTTAATTCGATGCAACGCGAAAAACCTTACCTACCCTTGACATGTCTGGAATCCTGAAGAGATTTGGGAGTGCTCGAAAGAGAGCCAGAACACAGGTGCTGCATGGCCGTCGTCAGCTCGTGTCGTGAGATGTTGGGTTAAGTCCCGCAACG	132	47	0	337	274	175	51	218	211	168	0	0	79	204	91	0	457	154	44	93	0	409	71	55	208	0	0	0	58	0	0	0	149	58	0	0	250	158	20	77	0	43	18	34	42	97
25fe3c13c8224abb2b34d06f706ad749	bASV277	d__Bacteria; p__Actinobacteriota; c__Thermoleophilia; o__Solirubrobacterales; f__Solirubrobacteraceae; g__Solirubrobacter; s__uncultured_bacterium	GTAGTCCACGCTGTAAACGATGGGCACTAGGTGTGGGGGGTGTCGACTCCCTCCGTGCCGAAGCTAACGCATTAAGTGCCCCGCCTGGGGAGTACGGCCGCAAGGCTAAAACTCAAAGGAATTGACGGGGGCCCGCACAAGCAGCGGAGCATGTGGTTTAATTCGACGCAACGCGAAGAACCTTACCTGGGCTTGACATGTGGATGACCGGCCTGGAAACAGGTCTTCCCTTCGGGGCATCTTCACAGGTGGTGCATGGCTGTCGTCAGCTCGTGTCGTGAGATGTTGGGTTAAGTCCCGCAACGA	504	173	297	130	0	188	41	266	77	298	271	217	99	136	555	0	0	350	0	83	81	195	220	0	77	587	104	117	377	649	188	137	149	173	444	1622	58	23	233	728	886	298	372	752	128	154
06a3b76fec46079a1d315111b76eefd2	bASV278	d__Bacteria; p__Actinobacteriota; c__Acidimicrobiia; o__Microtrichales; f__Ilumatobacteraceae; g__uncultured; s__uncultured_Acidimicrobiaceae	GTAGTCCACGCCGTAAACGTTGGGCACTAGGTGTGGGCTCTTACCAACGGAGTCCGTGCCGTAGCTAACGCATTAAGTGCCCCGCCTGGGGAGTACGGCCGCAAGGCTAAAACTCAAAGGAATTGACGGGGGCCCGCACAAGCGGCGGAGCATGTTGCTTAATTCGATGCAACGCGAAGAACCTTACCTGGGTTTGACATGTAGGGAAAAGCCGTGGAGACACGGTGTCCTTCGGGGCCTTACACAGGTGGTGCATGGCTGTCGTCAGCTCGTGTCGTGAGATGTTGGGTTAAGTCCCGCAACGAG	548	64	242	972	217	354	137	1663	591	624	380	207	824	609	1040	0	867	706	71	257	796	834	458	40	688	745	243	260	1010	258	131	226	255	468	316	456	0	0	148	402	673	326	598	764	310	548
318ca8d69bce42e390d471bedca2608d	bASV279	d__Bacteria; p__Desulfobacterota; c__uncultured; o__uncultured; f__uncultured; g__uncultured	GTAGTCCACGCTGTAAACGATGAGCACTAGGTGTCGTGGGTATTGACCCCCGCGGTGCCGACGCTAACGCATTAAGTGCTCCGCCTGGGGACTACGGCCGCAAGGTTAAAACTCAAAGGAATTGACGGGGGCCCGCACAAGCGGTGGAGCATGTGGTTCAATTCGACGCAACGCGAAGAACCTTACCTGGGCTAGACAACGGAGGACCGCTCCAGAGATGGGGCTTTCCCTTCGGGGACCTCCGGTTCAGGTGCTGCATGGCTGTCGTCAGCTCGTGTCGTGAGATGTTGGGTTAAGTCCCGCAAC	377	85	423	413	604	402	89	560	322	381	286	186	911	255	248	0	678	1662	143	202	522	341	246	14	729	346	129	99	652	1377	529	1153	438	427	194	298	0	0	278	581	531	186	444	685	943	572
7d9fac6d3ec9a4d41411ea5c24933982	bASV280	d__Bacteria; p__Proteobacteria; c__Alphaproteobacteria; o__Rhizobiales; f__Hyphomicrobiaceae; g__Pedomicrobium; s__uncultured_bacterium	GTAGTCCACGCCGTAAACGATGGATGCTAGCCGTCAGCAAGCATGCTTGTTGGTGGCGCAGCTAACGCATTAAGCATCCCGCCTGGGGAGTACGGCCGCAAGGTTAAAACTCAAAGGAATTGACGGGGGCCCGCACAAGCGGTGGAGCATGTGGTTTAATTCGACGCAACGCGCAGAACCTTACCAACCCTTGACATGCCCGGTCGGTTTCCAGAGATGGATTCCTCCCAGCAATGGGCCGGGACACAGGTGCTGCATGGCTGTCGTCAGCTCGTGTCGTGAGATGTTGGGTTAAGTCCCGCAACG	0	0	0	2493	668	728	866	3389	1637	807	577	0	748	147	97	0	1938	5016	781	1329	2980	1364	36	0	2282	1655	80	0	80	0	66	52	741	1092	0	310	0	0	0	0	0	102	215	196	319	297
1ce50af955b384ad049fe0a34eb4227e	bASV281	d__Bacteria; p__Proteobacteria; c__Gammaproteobacteria; o__Pseudomonadales; f__Pseudomonadaceae; g__Pseudomonas	GTAGTCCACGCCGTAAACGATGTCGACTAGCCGTTGGGATCCTTGAGATCTTAGTGGCGCAGCTAACGCATTAAGTCGACCGCCTGGGGAGTACGGCCGCAAGGTTAAAACTCAAATGAATTGACGGGGGCCCGCACAAGCGGTGGAGCATGTGGTTTAATTCGAAGCAACGCGAAGAACCTTACCTGGCCTTGACATGCTGAGAACTTTCCAGAGATGGATTGGTGCCTTCGGGAACTCAGACACAGGTGCTGCATGGCTGTCGTCAGCTCGTGTCGTGAGATGTTGGGTTAAGTCCCGTAACGA	92	0	109	0	0	0	0	0	0	0	0	0	0	155	0	0	0	0	0	0	0	0	70	0	173	0	0	0	154	0	0	0	70	0	0	0	0	0	0	41	0	91	0	0	341	0
a81697cce31c738ea8ebf5dc0260a796	bASV282	d__Bacteria; p__Acidobacteriota; c__Subgroup_11; o__Subgroup_11; f__Subgroup_11; g__Subgroup_11; s__uncultured_bacterium	GTAGTCCTAGCTGTAAACGATGGATACTTGCTGTGGGGGGTGTTAAATCCCCCTGTGGCGGAGCTAACGCATTAAGTATCCCGCCTGGGGAGTACGGTCGCAAGGCTGAAACTCAAAGGAATTGACGGGGGCCCGCACAAGCGGTGGAGCATGTGGTTCAATTCGACGCAACGCGAAGAACCTTACCTGGGCTTGAACTGGAGTGGAAGTTGGCAGAGATGTCAATGTCCTTTACCGGACTGCTCTAGAGGTGCTGCATGGCTGTCGTCAGCTCGTGTCGTGAGATGTTGGGTTAAGTCCCGCAAC	729	98	309	1198	323	1135	62	1732	1000	652	567	188	1127	357	342	0	230	2408	80	228	652	379	329	0	907	739	202	131	894	1001	351	1160	323	682	170	148	97	129	105	301	255	35	99	152	446	424
fbfab7baeca73fec8e347d61480fbc6d	bASV283	d__Bacteria; p__Proteobacteria; c__Alphaproteobacteria; o__Reyranellales; f__Reyranellaceae; g__Reyranella	GTAGTCCACGCCGTAAACGATGGGTGCTAGACGTTGGCGAGCTTGCTCGTCAGTGTCGCAGCTAACGCGTTAAGCACCCCGCCTGGGGAGTACGGCCGCAAGGTTGAAACTCAAAGGAATTGACGGGGGCCCGCACAAGCGGTGGAGCATGTGGTTCAATTCGACGCAACGCGAAGAACCTTACCAGCCCTTGACATGGGACTCGCCGGGAGCAGAGACGCTCCCTTCGGTTCGGCCGGAGTCCGCACAGGTGCTGCATGGCTGTCGTCAGCTCGTGTCGTGAGATGTTGGGTTAAGTCCCGCAAC	0	0	0	880	1942	815	338	872	455	0	0	0	1563	0	0	0	0	431	502	280	337	455	904	207	310	0	0	0	137	0	51	0	0	0	0	0	395	167	0	0	0	0	0	0	89	53
948150105b3224f1bf2196a4ed280267	bASV284	d__Bacteria; p__Actinobacteriota; c__Actinobacteria; o__Corynebacteriales; f__Mycobacteriaceae; g__Mycobacterium	GTAGTCCACGCCGTAAACGGTGGGTACTAGGTGTGGGTTTCCTTCCTTGGGATCCGTGCCGTAGCTAACGCATTAAGTACCCCGCCTGGGGAGTACGGCCGCAAGGCTAAAACTCAAAGGAATTGACGGGGGCCCGCACAAGCGGCGGAGCATGTGGATTAATTCGATGCAACGCGAAGAACCTTACCTGGGTTTGACATGCACAGGACGCGTCTAGAGATAGGCGTTCCCTTGTGGCCTGTGTGCAGGTGGTGCATGGCTGTCGTCAGCTCGTGTCGTGAGATGTTGGGTTAAGTCCCGCAACGA	0	0	0	0	0	443	129	145	0	104	162	0	289	0	118	0	0	440	189	162	176	249	2809	46	141	0	0	0	85	0	0	0	131	113	0	0	45	0	0	0	0	82	142	830	60	116
beef51ca9dbb5b8ab278b29690dc069e	bASV285	d__Bacteria; p__Actinobacteriota; c__Actinobacteria; o__Micromonosporales; f__Micromonosporaceae	GTAGTCCACGCTGTAAACGTTGGGCGCTAGGTGTGGGGGGCCTCTCCGGTTCTCTGTGCCGCAGCTAACGCATTAAGCGCCCCGCCTGGGGAGTACGGCCGCAAGGCTAAAACTCAAAGGAATTGACGGGGGCCCGCACAAGCGGCGGAGCATGCGGATTAATTCGATGCAACGCGAAGAACCTTACCTGGGTTTGACATGGCCGCAAAACTGTCAGAGATGGCAGGTCCTTCGGGGGCGGTCACAGGTGGTGCATGGCTGTCGTCAGCTCGTGTCGTGAGATGTTGGGTTAAGTCCCGCAACGAG	0	0	45	796	1086	175	177	954	374	487	214	0	183	299	101	0	1485	435	273	249	488	445	464	109	384	824	89	163	332	0	140	115	214	292	0	540	484	132	0	29	0	269	235	259	30	63
2a0201d948c7ed249af0a7748c875914	bASV286	d__Bacteria; p__Actinobacteriota; c__Acidimicrobiia; o__Microtrichales; f__Iamiaceae; g__Iamia; s__uncultured_Acidimicrobiales	GTAGTCCACGCCGTAAACGTTGGGTACTAGGTGTGGGGTCTTATCAACGGATTCCGTGCCGAAGCTAACGCATTAAGTACCCCGCCTGGGGAGTACGGCCGCAAGGCTAAAACTCAAAGGAATTGACGGGGGCCCGCACAAGCAGCGGAGCATGTTGCTTAATTCGAGGCAACGCGAAGAACCTTACCTGGGTTTGACATGGTAGGAAAAGCCGCAGAGATGCGGTGTCCTTTTGGGCCTATCACAGGTGGTGCATGGCTGTCGTCAGCTCGTGTCGTGAGATGTTGGGTTAAGTCCCGCAACGAG	1553	283	354	57	304	65	37	110	0	198	168	377	70	162	479	0	257	200	42	55	95	165	353	41	65	0	90	124	861	731	259	484	186	249	575	489	0	0	715	1396	1662	591	1215	1798	182	233
5981a9a1c7ad503d61bdfd4f4a50a009	bASV287	d__Bacteria; p__Bacteroidota; c__Bacteroidia; o__Flavobacteriales; f__Weeksellaceae; g__Chryseobacterium	GTAGTCCACGCCGTAAACGATGCTAACTCGTTTTTGGGTTTTCGGATTCAGAGACTAAGCGAAAGTGATAAGTTAGCCACCTGGGGAGTACGTTCGCAAGAATGAAACTCAAAGGAATTGACGGGGGCCCGCACAAGCGGTGGATTATGTGGTTTAATTCGATGATACGCGAGGAACCTTACCAAGGCTTAAATGGGAAATGACAGGTTTAGAAATAGACTTTTCTTCGGACATTTTTCAAGGTGCTGCATGGTTGTCGTCAGCTCGTGCCGTGAGGTGTTAGGTTAAGTCCTGCAACGAGCGCAA	0	0	0	0	0	0	3813	0	0	0	137	0	68	0	0	0	0	91	143	140	0	0	0	0	0	0	0	0	0	0	0	0	0	0	0	0	86	0	0	0	0	0	0	0	0	0
efb638554e2b06f952323752c3e237a5	bASV288	d__Bacteria; p__Proteobacteria; c__Gammaproteobacteria; o__Steroidobacterales; f__Steroidobacteraceae; g__Steroidobacter	GTAGTCCACGCCATAAACGATGAGAACTGGATGTCGGGAGGGTCTGCCTCTCGGTGTCGTAGCTAACGCGTTAAGTTCTCCGCCTGGGGAGTACGGCCGCAAGGTTGAAACTCAAAGGAATTGACGGGGACCCGCACAAGCGGTGGAGCATGTGGTTTAATTCGATGCAACGCGAAGAACCTTACCTGGTCTTGACATCCCAGGAATCCTGCAGAGATGTGGGAGTGCCTTCGGGAACCTGGAGACAGGTGCTGCATGGCTGTCGTCAGCTCGTGTCGTGAGATGTTGGGTTAAGTCCCGCAACGA	149	202	0	408	0	497	90	657	309	844	0	0	2365	210	355	0	1303	455	196	217	291	390	210	30	218	1310	103	136	657	944	153	385	255	238	216	0	0	0	188	703	502	573	2616	3414	403	218
9768a940f82cc312278e486f40327518	bASV289	d__Bacteria; p__Proteobacteria; c__Gammaproteobacteria; o__Burkholderiales; f__Burkholderiaceae; g__Burkholderia-Caballeronia-Paraburkholderia	GTAGTCCACGCCCTAAACGATGTCAACTAGTTGTTGGGGATTCATTTCCTTAGTAACGTAGCTAACGCGTGAAGTTGACCGCCTGGGGAGTACGGTCGCAAGATTAAAACTCAAAGGAATTGACGGGGACCCGCACAAGCGGTGGATGATGTGGATTAATTCGATGCAACGCGAAAAACCTTACCTACCCTTGACATGGTCGGAATCCCGCTGAGAGGTGGGAGTGCTCGAAAGAGAACCGGCGCACAGGTGCTGCATGGCTGTCGTCAGCTCGTGTCGTGAGATGTTGGGTTAAGTCCCGCAACG	0	0	0	0	0	179	52	105	0	139	111	0	0	0	0	0	1503	80	72	68	100	106	0	111	169	0	0	0	0	0	0	0	0	0	45	0	1143	111	0	0	0	0	0	0	0	0
f9c3deb29cb93c6d3bfe1f0897562123	bASV290	d__Bacteria; p__Actinobacteriota; c__Actinobacteria; o__Micrococcales; f__Micrococcaceae	GTAGTCCATGCCGTAAACGTTGGGCACTAGGTGTGGGGGACATTCCACGTTTTCCGCGCCGTAGCTAACGCATTAAGTGCCCCGCCTGGGGAGTACGGCCGCAAGGCTAAAACTCAAAGGAATTGACGGGGGCCCGCACAAGCGGCGGAGCATGCGGATTAATTCGATGCAACGCGAAGAACCTTACCAAGGCTTGACATGAACCGGTAACGCCTGGAAACAGGTGCCCCGCTTGCGGTCGGTTTACAGGTGGTGCATGGTTGTCGTCAGCTCGTGTCGTGAGATGTTGGGTTAAGTCCCGCAACG	0	0	0	0	260	1254	278	33	0	0	0	0	0	0	0	0	0	0	0	0	224	2748	31	0	38	0	0	0	0	0	0	0	0	0	0	0	597	58	0	0	0	0	0	0	0	0
3d6c2691b9d84a0ef567935291fe6e77	bASV291	d__Bacteria; p__Proteobacteria; c__Gammaproteobacteria; o__Gammaproteobacteria; f__Gammaproteobacteria; g__Gammaproteobacteria; s__uncultured_bacterium	GTAGTCCACGCCGTAAACGATGAGAACTAGCCGTTGGACCCCTTGAGGGTTTAGTGGCGTAGCTAACGCGATAAGTTCTCCGCCTGGGGAGTACGGCCGCAAGGCTAAAACTCAAATGAATTGACGGGGGCCCGCACAAGCGGTGGAGCATGTTGTTTAATTCGATGCAACGCGAAGAACCTTACCACCCCTTGACATCCTCGGAACTTGGCAGAGATGCCTTGGTGCCTTCGGGAACCGAGTGACAGGTGCTGCATGGCTGTCGTCAGCTCGTGTCGTGAGATGTTGGGTTAAGTCCCGTAACGA	705	113	255	429	337	437	0	480	249	352	260	270	1013	363	311	0	0	866	105	116	375	375	105	27	399	613	186	153	439	574	205	441	383	298	239	0	0	0	47	141	118	69	126	143	379	221
5dd72c5af829832fe31264b744431620	bASV292	d__Bacteria; p__Proteobacteria; c__Alphaproteobacteria; o__Sphingomonadales; f__Sphingomonadaceae; g__Sphingomonas	GTAGTCCACGCCGTAAACGATGATAACTAGCTGTCCGGGGACTTGGTCTTTGGGTGGCGCAGCTAACGCATTAAGTTATCCGCCTGGGGAGTACGGCCGCAAGGTTAAAACTCAAATGAATTGACGGGGGCCTGCACAAGCGGTGGAGCATGTGGTTTAATTCGAAGCAACGCGCAGAACCTTACCAGCGTTTGACATGTCCGGACGATTTCCAGAGATGGATCTCTTCCCTTCGGGGACTGGAACACAGGTGCTGCATGGCTGTCGTCAGCTCGTGTCGTGAGATGTTGGGTTAAGTCCCGCAAC	162	96	182	261	0	146	279	533	1232	129	102	72	419	176	55	0	616	358	142	113	161	300	182	188	89	193	93	198	484	258	71	121	360	152	127	0	0	144	0	43	439	57	98	0	0	0
704f964a26bb0e32fcedd6b48ec2a01d	bASV293	d__Bacteria; p__Proteobacteria; c__Alphaproteobacteria; o__Rhizobiales; f__Beijerinckiaceae; g__Microvirga	GTAGTCCACGCCGTAAACGATGAATGCCAGCCGTTGGGCAGCTTGCTGCTCAGTGGCGCAGCTAACGCTTTAAGCATTCCGCCTGGGGAGTACGGTCGCAAGATTAAAACTCAAAGGAATTGACGGGGGCCCGCACAAGCGGTGGAGCATGTGGTTTAATTCGAAGCAACGCGCAGAACCTTACCAGCCTTTGACATGTCCGGTTTGGATCCTGGAGACAGGTTCCTTCAGTTCGGCTGGCCGGAACACAGGTGCTGCATGGCTGTCGTCAGCTCGTGTCGTGAGATGTTGGGTTAAGTCCCGCAA	583	154	177	200	162	766	57	360	110	771	913	117	292	314	675	0	344	1158	64	152	247	586	57	36	220	761	0	24	175	155	29	64	328	238	110	0	0	0	54	121	44	99	77	135	352	187
740818616ef8dd78df74b357bfbb10f7	bASV294	d__Bacteria; p__Actinobacteriota; c__Thermoleophilia; o__Gaiellales; f__uncultured; g__uncultured	GTAGTCCACGCCGTAAACGATGGGTGCTAGGTGTGGGCGGTGTCGACTCCGCCCGTGCCGAAGCTAACGCATTAAGCACCCCGCCTGGGGAGTACGGCCGCAAGGCTAAAACTCAAAGGAATTGACGGGGGCCCGCACAAGCAGCGGAGCATGTGGTTTAATTCGACGCAACGCGAAGAACCTTACCAGGGCTTGACATGCACGGGAATGTCGTAGAAATACGGCAGCCCTTCGGGGCTCGTGCACAGGTGGTGCATGGCTGTCGTCAGCTCGTGTCGTGAGATGTTGGGTTAAGTCCCGCAACGA	765	113	381	788	0	412	111	1688	463	659	771	218	252	431	737	0	0	2531	0	423	966	590	0	0	939	1302	0	0	82	0	72	144	505	709	391	0	0	0	149	287	445	60	114	119	956	400
ee88ad4ccada9a38658d908d36da3726	bASV295	d__Bacteria; p__Bacteroidota; c__Bacteroidia; o__Chitinophagales; f__Chitinophagaceae; g__Niastella	GTAGTCCACGCCCTAAACGATGGATACTCGACATACGCGATACACAGTGTGTGTCTGAGCGAAAGCATTAAGTATCCCACCTGGGAAGTACGACCGCAAGGTTGAAACTCAAAGGAATTGGCGGGGGTCCGCACAAGCGGTGGAGCATGTGGTTTAATTCGATGATACGCGAGGAACCTTACCTGGGCTAGAATGCAGATTGACCGTGGGTGAAAGCTCATTTTGTAGCAATACACAGTCTGTAAGGTGCTGCATGGCTGTCGTCAGCTCGTGCCGTGAGGTGTTGGGTTAAGTCCCGCAACGAGC	0	82	35	173	0	0	0	220	104	85	188	62	67	145	445	0	715	0	0	62	145	505	575	0	329	793	155	128	741	1428	0	72	0	0	429	476	37	35	0	261	96	100	108	133	46	217
9db5a98860b9eaeccf5e2c6b1f5690a1	bASV296	d__Bacteria; p__Acidobacteriota; c__Acidobacteriae; o__Acidobacteriales; f__uncultured; g__uncultured	GTAGTCCTAGCCCTAAACGATGGATGCTTGGTGTGTCGGGTACCCAATCCCGCCGTGCCGAAGCTAACGCGATAAGCATCCCGCCTGGGGAGTACGGTCGCAAGGCTGAAACTCAAAGGAATTGACGGGGGCCCGCACAAGCGGTGGAGCATGTGGTTCAATTCGACGCAACGCGAAGAACCTTACCTGGGCTCGAAGCGCAGTGGACCGGGGTAGAAATATCCCTTTCCGCAAGGACTGCTGCGGAGGTGCTGCATGGCTGTCGTCAGCTCGTGTCGTGAGATGTTGGGTTAAGTCCCGCAACGA	0	0	0	2576	0	3600	475	3179	1682	344	171	0	3776	250	43	0	624	496	696	570	447	1460	0	0	627	995	0	0	169	0	62	0	94	68	0	0	98	83	0	0	0	0	0	0	0	284
7498661b653879f1cc945f8e7d716a32	bASV297	d__Bacteria; p__Proteobacteria; c__Alphaproteobacteria; o__Rhizobiales; f__Hyphomicrobiaceae	GTAGTCCACGCCGTAAACGATGGATGCTAGCCGTCGGCAAGCTTGCTTGTCGGTGGCGCAGCTAACGCATTAAGCATCCCGCCTGGGGAGTACGGCCGCAAGGTTAAAACTCAAAGGAATTGACGGGGGCCCGCACAAGCGGTGGAGCATGTGGTTTAATTCGACGCAACGCGAAGAACCTTACCAGCTCTTGACATGTCCGGACGGTTTCCAGAGATGGATTCCTCTCAGCAATGGGCCGGAACACAGGTGCTGCATGGCTGTCGTCAGCTCGTGTCGTGAGATGTTGGGTTAAGTCCCGCAACG	0	0	0	131	1216	555	430	101	0	0	0	0	1069	247	0	0	0	87	317	130	68	250	455	149	97	0	76	67	195	0	79	38	0	0	0	0	558	191	0	0	0	42	109	148	0	134
a3288b663380c5c3ac516e125709221c	bASV298	d__Bacteria; p__Proteobacteria; c__Gammaproteobacteria; o__Steroidobacterales; f__Steroidobacteraceae; g__Steroidobacter	GTAGTCCACGCCATAAACGATGAGAACTGGATGTCGGGAGGGTCTGCCTCTCGGTGTCGTAGCTAACGCGTTAAGTTCTCCGCCTGGGGAGTACGGCCGCAAGGTTGAAACTCAAAGGAATTGACGGGGACCCGCACAAGCGGTGGAGCATGTGGTTTAATTCGATGCAACGCGAAGAACCTTACCTGGTCTTGACATCCTAGGAATCCTGCAGAGATGTGGGAGTGCCTTCGGGAACCTGGAGACAGGTGCTGCATGGCTGTCGTCAGCTCGTGTCGTGAGATGTTGGGTTAAGTCCCGCAACGA	318	0	203	206	0	0	0	257	122	204	328	283	143	0	0	0	0	285	0	0	169	185	74	0	178	0	0	0	109	0	144	442	0	0	445	0	0	37	78	450	304	162	291	310	370	0
117699e2125872c4ff8ea5bdb034a5d6	bASV299	d__Bacteria; p__Proteobacteria; c__Alphaproteobacteria; o__Rhizobiales; f__Rhizobiaceae	GTAGTCCACGCCGTAAACGATGAATGTTAGCCGTCGGCATGCATGCATGTCGGTGGCGCAGCTAACGCATTAAACATTCCGCCTGGGGAGTACGGTCGCAAGATTAAAACTCAAAGGAATTGACGGGGGCCCGCACAAGCGGTGGAGCATGTGGTTTAATTCGAAGCAACGCGCAGAACCTTACCAGCCCTTGACATCCCGATCGCGGTTAGTGGAGACACTATCCTTCAGTTCGGCTGGATCGGAGACAGGTGCTGCATGGCTGTCGTCAGCTCGTGTCGTGAGATGTTGGGTTAAGTCCCGCAA	589	0	238	333	403	280	31	340	171	4808	0	143	269	143	303	0	0	1230	0	112	525	322	327	0	808	0	155	166	613	349	117	116	735	389	213	0	0	49	232	363	257	116	99	94	497	977
1c69e07a3df71c883f22b4884e823938	bASV300	d__Bacteria; p__Actinobacteriota; c__Actinobacteria; o__Propionibacteriales; f__Nocardioidaceae; g__Nocardioides; s__Marmoricola_sp.	GTAGTCCACACCGTAAACGTTGGGCGCTAGGTGTGGGACTCATTCCACGAGTTCCGTGCCGCAGCTAACGCATTAAGCGCCCCGCCTGGGGAGTACGGCCGCAAGGCTAAAACTCAAAGGAATTGACGGGGGCCCGCACAAGCGGCGGAGCATGCGGATTAATTCGATGCAACGCGAAGAACCTTACCTGGGTTTGACATATGGAGAAATCTCCCAGAGATGGGAGGTCCGTAAGGGCTCCATACAGGTGGTGCATGGCTGTCGTCAGCTCGTGTCGTGAGATGTTGGGTTAAGTCCCGCAACGAG	1818	320	809	0	227	0	0	0	0	0	0	409	74	266	308	0	0	0	0	0	0	0	439	57	0	0	232	319	938	574	182	226	0	0	399	800	0	0	214	546	731	441	599	779	150	85
347999c0f4d5bb5b8698253072ac745c	bASV302	d__Bacteria; p__Actinobacteriota; c__Actinobacteria; o__Micrococcales; f__Intrasporangiaceae; g__Terrabacter	GTAGTCCATGCCGTAAACGTTGGGAACTAGGTGTGGGTCTCATTCCACGAGATCCGTGCCGCAGCTAACGCATTAAGTTCCCCGCCTGGGGAGTACGGCCGCAAGGCTAAAACTCAAAGGAATTGACGGGGGCCCGCACAAGCGGCGGAGCATGCGGATTAATTCGATGCAACGCGAAGAACCTTACCAAGGCTTGACATACACCGGAATCACTCAGAGATGGGTGCGTCTTCGGACTGGTGTACAGGTGGTGCATGGTTGTCGTCAGCTCGTGTCGTGAGATGTTGGGTTAAGTCCCGCAACGAG	318	92	265	94	141	75	27	261	51	118	0	114	128	95	127	0	0	107	16	33	39	85	245	51	52	296	128	99	268	0	64	42	0	36	51	189	852	150	31	93	103	140	164	177	0	85
fed0fa6c06cb1aa92ebd79203411acf0	bASV303	d__Bacteria; p__Proteobacteria; c__Gammaproteobacteria; o__Burkholderiales; f__Nitrosomonadaceae; g__Ellin6067	GTAGTCCACGCCCTAAACGATGTCGACTGGTTGTTGGGGGTTTGACACTCTCAGTAACGAAGCTAACGCGTGAAGTCGACCGCCTGGGGAGTACGGCCGCAAGGTTAAAACTCAAAGGAATTGACGGGGACCCGCACAAGCGGTGGATTATGTGGATTAATTCGATGCAACGCGAAAAACCTTACCTACCCTTGACATGTCCCGAAGCCCGGTGAGAGCTGGGTGTGCCCGAAAGGGAACGGGAACACAGGTGCTGCATGGCTGTCGTCAGCTCGTGTCGTGAGATGTTGGGTTAAGTCCCGCAAC	499	125	165	116	0	203	73	198	50	236	159	102	185	410	538	0	0	353	67	161	318	170	549	37	378	434	160	293	1251	0	411	473	241	199	749	1101	142	0	171	309	195	125	71	179	95	150
0d8481a2c0f838273c4fa01c505da849	bASV304	d__Bacteria; p__Actinobacteriota; c__Acidimicrobiia; o__IMCC26256; f__IMCC26256; g__IMCC26256; s__uncultured_Ferrimicrobium	GTAGTCCACGCCGTAAACGTTGGGCACTAGGTGTGGGGATCTATCGACGGTTTCCGTGCCGAAGCTAACGCATTAAGTGCCCCGCCTGGGGAGTACGGCCGCAAGGCTAAAACTCAAAGGAATTGACGGGGGCCCGCACAAGCGGCGGAGCATGTGGCTTAATTCGATGCAACGCGAAGAACCTTACCAAGGCTTGACATTCTGGGTAATCCGTGGAAACACGGTGATCCTTCGGGATCCAGAACAGGTGGTGCATGGCTGTCGTCAGCTCGTGTCGTGAGATGTTGGGTTAAGTCCCGCAACGAG	77	0	44	602	335	503	158	884	262	387	134	34	809	272	108	0	350	938	127	107	403	413	957	84	369	757	171	132	517	93	80	66	191	194	47	354	166	44	9	19	21	82	103	158	39	301
acae43f7a5c82581ef878c053df75d7f	bASV305	d__Bacteria; p__Proteobacteria; c__Alphaproteobacteria; o__Rhizobiales; f__Xanthobacteraceae; g__uncultured	GTAGTCCACGCCGTAAACGATGGAGGCTAGCCGTTGGCGAGCATGCTCGTCAGTGGCGCAGCTAACGCATTAAGCCTCCCGCCTGGGGAGTACGGTCGCAAGATTAAAACTCAAAGGAATTGACGGGGGCCCGCACAAGCGGTGGAGCATGTGGTTCAATTCGAAGCAACGCGCAGAACCTTACCAGCCCTTGACATCCCGGTCGCGGGAACGAGAGATCGATCCCTTCAGTTCGGCTGGACCGGAGACAGGTGCTGCATGGCTGTCGTCAGCTCGTGTCGTGAGATGTTGGGTTAAGTCCCGCAA	0	0	0	0	0	0	0	0	0	0	0	0	0	0	0	0	0	0	0	0	0	0	0	0	0	0	0	0	0	0	0	0	0	0	0	0	0	0	0	0	0	0	0	0	0	0
e9d1bd60b898a05357bb7758ef2ed915	bASV306	d__Bacteria; p__Bacteroidota; c__Bacteroidia; o__Sphingobacteriales; f__Sphingobacteriaceae; g__Sphingobacterium	GTAGTCCACGCCCTAAACGATGATAACTCGATGTTGGCGATAGACAGCCAGCGTCCAAGCGAAAGCGTTAAGTTATCCACCTGGGGAGTACGCCCGCAAGGGTGAAACTCAAAGGAATTGACGGGGGCCCGCACAAGCGGAGGAGCATGTGGTTTAATTCGATGATACGCGAGGAACCTTACCCGGGCTTGAAAGTTAGTGAAGAGTGCAGAGACGCACTCGTCCTTCGGGACACGAAACTAGGTGCTGCATGGCTGTCGTCAGCTCGTGCCGTGAGGTGTTGGGTTAAGTCCCGCAACGAGCGCA	80	0	0	0	0	22	0	0	0	0	0	91	0	43	0	0	0	15	0	97	0	63	110	0	0	0	0	0	24	0	0	0	0	0	0	0	27	0	0	0	0	0	0	0	0	0
9b0d1db1cce7c757f8f50b6a7cef1faf	bASV307	d__Bacteria; p__Actinobacteriota; c__Actinobacteria; o__Propionibacteriales; f__Nocardioidaceae; g__Nocardioides	GTAGTCCACACCGTAAACGTTGGGCGCTAGGTGTGGGATCCATTCCACGGGTTCCGTGCCGCAGCTAACGCATTAAGCGCCCCGCCTGGGGAGTACGGCCGCAAGGCTAAAACTCAAAGGAATTGACGGGGGCCCGCACAAGCGGCGGAGCATGCGGATTAATTCGATGCAACGCGAAGAACCTTACCTGGGTTTGACATACACCCTGCCGCTCCAGAGATGGGGCTTCTTTTGGGGGTGTACAGGTGGTGCATGGCTGTCGTCAGCTCGTGTCGTGAGATGTTGGGTTAAGTCCCGCAACGAGCG	0	0	0	0	0	0	0	0	0	0	0	0	0	0	0	0	0	0	0	0	0	0	0	0	0	0	0	0	0	0	0	0	0	0	0	0	0	0	0	0	0	0	0	0	0	0
04825669bb18d35be84b4319c90086b8	bASV308	d__Bacteria; p__Proteobacteria; c__Alphaproteobacteria; o__Rhizobiales; f__Rhizobiales_Incertae_Sedis; g__Nordella	GTAGTCCACGCCGTAAACTATGGGTGCTAGCTGTCAGCGGGCTTGCTCGTTGGTGGCGCAGCTAACGCATTAAGCACCCCGCCTGGGGAGTACGGTCGCAAGATTAAAACTTAAAGGAATTGACGGGGGCCCGCACAAGCGGTGGAGCATGTGGTTTAATTCGAAGCAACGCGCAGAACCTTACCAACCCTTGACATCCCGGTCGCGGACATCAGAGATGAAGTCCTTCAGTTCGGCTGGACCGGAGACAGGTGCTGCATGGCTGTCGTCAGCTCGTGTCGTGAGATGTTGGGTTAAGTCCCGCAA	92	0	37	0	584	381	0	0	0	0	0	53	59	96	0	0	0	60	0	102	0	0	673	79	0	0	78	88	268	1050	598	973	0	0	317	0	532	110	44	107	97	160	337	464	0	100
d5c55c9e299fda0103b01bc9f3b1e94b	bASV309	d__Bacteria; p__Proteobacteria; c__Alphaproteobacteria; o__Rhizobiales; f__Xanthobacteraceae; g__Rhodoplanes; s__uncultured_bacterium	GTAGTCCACGCCGTAAACGATGAATGCTAGCCGTTGGCGAGCTTGCTCGTCAGTGGCGCAGCTAACGCTTTAAGCATTCCGCCTGGGGAGTACGGTCGCAAGATTAAAACTCAAAGGAATTGACGGGGGCCCGCACAAGCGGTGGAGCATGTGGTTCAATTCGACGCAACGCGAAGAACCTTACCAGCCCTTGACATGCCACGACGGTTTCCAGAGATGGATTCTTCCCCGCAAGGGGCGTGGACACAGGTGCTGCATGGCTGTCGTCAGCTCGTGTCGTGAGATGTTGGGTTAAGTCCCGCAACG	157	72	49	0	1311	251	0	42	0	116	64	80	38	231	124	0	0	123	0	23	0	47	1628	29	0	0	79	73	628	561	383	342	86	0	168	1261	149	33	105	379	163	66	69	267	122	104
9c0148234bb8793e5ef8a8cbe28d9ccd	bASV310	d__Bacteria; p__Proteobacteria; c__Alphaproteobacteria; o__Rhizobiales; f__Xanthobacteraceae; g__uncultured	GTAGTCCACGCCGTAAACGATGGATGCTAGCCGTTGGCAGGCTTGCCTGTCAGTGGCGCAGCTAACGCTTTAAGCATCCCGCCTGGGGAGTACGGTCGCAAGATTAAAACTCAAAGGAATTGACGGGGGCCCGCACAAGCGGTGGAGCATGTGGTTCAATTCGAAGCAACGCGAAGAACCTTACCAGCCCTTGACATCCCGGTCGCGGGAACGAGAGATCGATCCCTTCAGTTCGGCTGGACCGGAGACAGGTGCTGCATGGCTGTCGTCAGCTCGTGTCGTGAGATGTTGGGTTAAGTCCCGCAA	0	0	0	311	599	587	175	353	91	0	84	0	983	132	0	0	792	249	205	276	147	837	260	266	108	385	73	66	216	0	33	0	0	55	0	0	30	0	0	0	0	90	32	42	0	61
aa24200e26d05d379fe3c640eb535d80	bASV311	d__Bacteria; p__Firmicutes; c__Bacilli; o__Bacillales; f__Planococcaceae; g__Lysinibacillus	GTAGTCCACGCCGTAAACGATGAGTGCTAAGTGTTAGGGGGTTTCCGCCCCTTAGTGCTGCAGCTAACGCATTAAGCACTCCGCCTGGGGAGTACGGTCGCAAGACTGAAACTCAAAGGAATTGACGGGGGCCCGCACAAGCGGTGGAGCATGTGGTTTAATTCGAAGCAACGCGAAGAACCTTACCAGGTCTTGACATCCCGTTGACCACTGTAGAGATATGGTTTTCCCTTCGGGGACAACGGTGACAGGTGGTGCATGGTTGTCGTCAGCTCGTGTCGTGAGATGTTGGGTTAAGTCCCGCAA	1348	0	2186	699	0	177	73	468	329	343	205	511	641	137	575	0	432	109	95	459	138	105	75	56	281	0	50	86	486	0	28	51	0	0	394	0	139	34	0	67	66	44	57	97	1499	43
a20b4b0356bda647710097928d45db2d	bASV312	d__Bacteria; p__Actinobacteriota; c__Thermoleophilia; o__Gaiellales; f__uncultured; g__uncultured	GTAGTCCACGCCGTAAACGATGGGTGCTAGGTGTGGGCGGTGTCGACTCCGTCCGTGCCGAAGCTAACGCATTAAGCACCCCGCCTGGGGAGTACGGCCGCAAGGCTAAAACTCAAAGGAATTGACGGGGGCCCGCACAAGCAGCGGAGCATGTGGTTCAATTCGACGCAACGCGAAGAACCTTACCTAGGCTTGACATGCACTGGAATTGCGTAGAAATACGTAAGCCCTTCGGGGCTAGTGCACAGGTGGTGCATGGCTGTCGTCAGCTCGTGTCGTGAGATGTTGGGTTAAGTCCCGCAACGA	0	0	37	3266	0	795	199	5498	1732	530	144	0	756	432	361	0	1046	2017	203	814	547	546	225	39	457	735	69	43	101	0	35	20	379	462	0	0	0	0	0	0	0	119	226	329	203	331
47b5aa874b34e67d7020cd2b39378ade	bASV313	d__Bacteria; p__Proteobacteria; c__Gammaproteobacteria; o__Burkholderiales; f__TRA3-20; g__TRA3-20; s__uncultured_gamma	GTAGTCCACGCCCTAAACGATGTCGACTAGTTGTTGGGGGAGTCTGTCCCTCAGTAACGTAGCTAACGCGTGAAGTCGACCGCCTGGGGAGTACGGTCGCAAGATTAAAACTCAAAGGAATTGACGGGGACCCGCACAAGCGGTGGATTATGTGGATTAATTCGATGCAACGCGAAGAACCTTACCTACCCTTGACATGCCAGGAACCCTGCAGAGATGCAGGGGTGCCCGAAAGGGAACCTGGACACAGGTGCTGCATGGCTGTCGTCAGCTCGTGTCGTGAGATGTTGGGTTAAGTCCCGCAAC	397	241	257	38	0	116	0	74	19	78	250	94	141	140	519	0	0	485	0	58	69	75	239	17	114	0	41	32	569	1576	289	960	228	197	371	213	0	0	172	373	271	62	105	180	355	203
8b1feb784790af9459bed1ae5bef93ae	bASV314	d__Bacteria; p__Proteobacteria; c__Gammaproteobacteria; o__Burkholderiales; f__Comamonadaceae	GTAGTCCACGCCCTAAACGATGTCAACTGGTTGTTGGGTCTTCACTGACTCAGTAACGAAGCTAACGCGTGAAGTTGACCGCCTGGGGAGTACGGCCGCAAGGTTGAAACTCAAAGGAATTGACGGGGACCCGCACAAGCGGTGGATGATGTGGTTTAATTCGATGCAACGCGAAAAACCTTACCCACCTTTGACATGTATGGAATCCTTTAGAGATAGAGGAGTGCTCGAAAGAGAGCCATAACACAGGTGCTGCATGGCTGTCGTCAGCTCGTGTCGTGAGATGTTGGGTTAAGTCCCGCAACG	0	397	0	86	0	0	0	0	77	0	0	0	0	98	0	0	0	25	0	72	0	0	0	115	394	0	0	0	0	0	0	0	310	0	0	0	0	0	0	65	0	14	0	15	0	0
e1cb824d13a46eae3b5563ab6c1ae12b	bASV315	d__Bacteria; p__Proteobacteria; c__Alphaproteobacteria; o__Rhizobiales; f__Xanthobacteraceae; g__uncultured	GTAGTCCACGCCGTAAACGATGGATGCTAGCCGTTGGCAGGCTTGCCTGTCAGTGGCGCAGCTAACGCATTAAGCATCCCGCCTGGGGAGTACGGTCGCAAGATTAAAACTCAAAGGAATTGACGGGGGCCCGCACAAGCGGTGGAGCATGTGGTTCAATTCGAAGCAACGCGCAGAACCTTACCAACCTTTGACATGTCCCGTATGAGCACCAGAGATGGAGCTCTTCAGTTCGGCTGGCGGGAACACAGGTGCTGCATGGCTGTCGTCAGCTCGTGTCGTGAGATGTTGGGTTAAGTCCCGCAA	102	0	104	574	0	919	142	686	327	630	464	102	571	382	0	0	0	1353	0	200	388	422	698	0	428	1332	0	0	93	0	179	190	446	495	0	0	148	0	0	171	99	129	150	294	359	280
a18b5fd2f89d7fb4d5d35a205441d8c4	bASV316	d__Bacteria; p__Actinobacteriota; c__Actinobacteria; o__Micrococcales; f__Intrasporangiaceae; g__Intrasporangium	GTAGTCCATGCCGTAAACGTTGGGCGCTAGGTGTGGGACTCATTCCACGAGTTCCGTGCCGCAGCTAACGCATTAAGCGCCCCGCCTGGGGAGTACGGCCGCAAGGCTAAAACTCAAAGGAATTGACGGGGGCCCGCACAAGCGGCGGAGCATGCGGATTAATTCGATGCAACGCGAAGAACCTTACCAAGGCTTGACATACACCGGACACATCCAGAGATGGGTGCTTCTTCGGACTGGTGTACAGGTGGTGCATGGTTGTCGTCAGCTCGTGTCGTGAGATGTTGGGTTAAGTCCCGCAACGAG	173	0	247	0	1161	140	0	70	0	0	0	152	157	189	253	0	0	72	0	76	0	0	1302	106	51	0	342	274	653	744	291	342	94	0	314	1286	114	0	140	319	277	502	705	666	206	59
025ebf2f3781215343a0a19091bb8293	bASV317	d__Bacteria; p__Acidobacteriota; c__Subgroup_5; o__Subgroup_5; f__Subgroup_5; g__Subgroup_5; s__uncultured_bacterium	GTAGTCCTAGCCCTAAACGATGGATACTTGGTGTGACTGGGATTGAATCCAGTCGTGCCGAAGCTAACGCATTAAGTATCCCGCCTGGGGAGTACGGTCGCAAGGCTGAAACTCAAAGGAATTGACGGGGGCCCGCACAAGCGGTGGAGTATGTGGTTTAATTCGACGCAACGCGAAGAACCTTACCTGGGCTCGAACGGCTAGTGACAGGTGGCGAAAGTCGCTTTTCCCGCAAGGGACATTAGTCGAGGTGCTGCATGGCTGTCGTCAGCTCGTGTCGTGAGATGTTGGGTTAAGTCCCGCAAC	199	111	116	1271	0	611	275	1774	749	440	611	103	1891	252	0	0	0	1926	458	241	472	892	304	0	646	1771	94	0	434	0	0	117	513	836	193	0	0	0	84	197	49	93	113	110	292	455
5ab033e0b09c339b165cb94339ec19a9	bASV319	d__Bacteria; p__Acidobacteriota; c__Acidobacteriae; o__Acidobacteriales; f__uncultured; g__uncultured	GTAGTCCTAGCCCTAAACGATGATTGCTTGGTGTAGCAGGTACCCAATCCTGCTGTGCCGCAGCTAACGCGATAAGCAATCCGCCTGGGGAGTACGGTCGCAAGGCTGAAACTCAAAGGAATTGACGGGGGCCCGCACAAGCGGTGGAGCATGTGGTTCAATTCGACGCAACGCGAAGAACCTTACCTGGGCTCGAAGCGCAGTGGACCGGGGTAGAAATATCCCTTCCCCTTAAAAGGCTGCTGCGGAGGTGCTGCATGGCTGTCGTCAGCTCGTGTCGTGAGATGTTGGGTTAAGTCCCGCAAC	0	0	0	195	236	711	68	167	73	0	0	0	393	19	0	0	0	0	80	0	0	463	89	661	78	0	0	0	0	0	87	0	0	0	0	0	144	25	0	0	0	0	0	0	0	0
b84f221ba705a2519708bdb29aeffd43	bASV320	d__Bacteria; p__Proteobacteria; c__Alphaproteobacteria; o__Caulobacterales; f__Hyphomonadaceae; g__Hirschia; s__uncultured_bacterium	GTAGTCCACGCCTTAAACGATGAGAGCTAGTTGTCAGTAAGCATGCTTATTGGTGACGCAGCTAACGCATTAAGCTCTCCGCCTGGGGAGTACGGCCGCAAGGTTAAAACTCAAAGAAATTGACGGGGGCCCGCACAAGCGGTGGAGCATGTGGTTTAATTCGAAGCAACGCGCAGAACCTTACCCACCTTTGACATCCCGTGCTATCTAGAGAGATCTAGAGTCCCTTCGGGGCGCGGAGACAGGTGCTGCATGGCTGTCGTCAGCTCGTGTCGTGAGATGTTGGGTTAAGTCCCGCAACGAGCG	52	74	64	338	164	179	48	405	235	351	278	27	241	430	146	0	568	335	57	195	511	316	35	11	665	497	25	19	143	785	359	814	283	170	107	175	16	33	80	253	116	32	48	126	308	132
6f4fbbe18e99a4460aa65ce4730882d4	bASV321	d__Bacteria; p__Proteobacteria; c__Alphaproteobacteria; o__Rhizobiales; f__Xanthobacteraceae; g__uncultured	GTAGTCCACGCCGTAAACGATGGATGCTAGCCGTTGGCGGGTTTACCCGTCAGTGGCGCAGCTAACGCTTTAAGCATCCCGCCTGGGGAGTACGGTCGCAAGATTAAAACTCAAAGGAATTGACGGGGGCCCGCACAAGCGGTGGAGCATGTGGTTCAATTCGAAGCAACGCGAAGAACCTTACCAGCCCTTGACATCCCGGTCGCGGGAACGAGAGATCGATCCCTTCAGTTCGGCTGGACCGGAGACAGGTGCTGCATGGCTGTCGTCAGCTCGTGTCGTGAGATGTTGGGTTAAGTCCCGCAA	0	0	0	770	1306	938	258	402	264	0	0	0	200	0	0	0	0	187	250	170	157	471	106	254	192	0	0	0	0	0	67	0	0	0	0	0	0	0	0	0	0	0	0	0	0	0
b725f75a1f9fe4a214a83522fbe81410	bASV322	d__Bacteria; p__RCP2-54; c__RCP2-54; o__RCP2-54; f__RCP2-54; g__RCP2-54	GTAGTCCACGCTGTAAACGATGGGCACTAGGTGTCCGGGGTATTGACCCCCTGGGTGCCGCAGCTAACGCATTAAGTGCCCCGCCTGGGGAGTACGGTCGCAAGATTAAAACTCAAAGGAATTGACGGGGGCCCGCACAAGCGGTGGAGCATGTGGTTCAATTCGACGCAACGCGAAGAACCTTACCTGGGCTAGACAACAGCGGACCGTCCTAGAAATAGGATTTTCCCTTCGGGGACCGCTGGTTCAGGTGCTGCATGGCTGTCGTCAGCTCGTGCCGTGAGGTGTTGGGTTAAGTCCCGCAAC	475	73	50	396	0	344	0	436	263	0	0	277	291	242	199	0	0	243	0	172	131	0	489	0	197	0	214	168	1076	2108	406	985	263	338	513	602	0	0	290	945	446	197	697	720	201	307
d17370dab921face30b10af52dc13c46	bASV324	d__Bacteria; p__Proteobacteria; c__Gammaproteobacteria; o__Gammaproteobacteria_Incertae_Sedis; f__Unknown_Family; g__Acidibacter; s__uncultured_gamma	GTAGTCCACGCCATAAACGATGAGAACTAGACGTTGAGAGGGTAAGCCTCGCAGTGTCGTAGCTAACGCGCTAAGTTCTCCGCCTGGGGAGTACGGCCGCAAGGTTGAAACTCAAAGGAATTGACGGGGACCCGCACAAGCGGTGGAGCATGTGGTTTAATTCGATGCAACGCGAAGAACCTTACCTGGTCTTGACATCCTGGGAATCCCGTAGAGATATGGGAGTGCCGCAAGGAGCCCAGAGACAGGTGCTGCATGGCTGTCGTCAGCTCGTGTCGTGAGATGTTGGGTTAAGTCCCGCAACGA	0	0	0	123	0	596	172	120	74	0	0	0	521	74	0	0	0	0	202	48	49	368	84	32	82	0	0	0	0	0	0	0	0	0	0	0	74	41	0	0	0	0	0	0	0	0
a4a52bdc9b45bc2efb1f9180d0f4b4f2	bASV325	d__Bacteria; p__RCP2-54; c__RCP2-54; o__RCP2-54; f__RCP2-54; g__RCP2-54; s__uncultured_bacterium	GTAGTCCACGCTGTAAACGATGGGAGCTAGGTGTGGGAGGTATTGACCCTTCCGTGCCGCCGCTAACGCATTAAGCTCCCCGCCTGGGGATTACGGCCGCAAGGTTAAAACTCAAAGGAATTGACGGGGGCCCGCACAAGCGGTGGAGCATGTGGTTCAATTCGACGCAACGCGAAGAACCTTACCTGGGCTAGACAACGGCGGACCGCCCCAGAGATGGGGCTTTCCCTTCGGGGACTGCCGGTTCAGGTGCTGCATGGCTGTCGTCAGCTCGTGTCGTGAGATGTTGGGTTAAGTCCCGCAACG	75	0	388	855	253	841	248	1066	697	537	286	66	1063	397	222	0	757	1717	368	266	911	720	233	17	737	724	47	36	477	0	41	45	284	338	18	115	0	0	0	43	42	86	127	204	639	312
5b3c0365f9dcedc62c55373572710d63	bASV326	d__Bacteria; p__Entotheonellaeota; c__Entotheonellia; o__Entotheonellales; f__Entotheonellaceae; g__Entotheonellaceae; s__metagenome	GTAGTCCACGCTGTAAACGATGGGCACTAGGTGCCGGCGGTCTTGATCCCGTCGGTGCCGGCGCTAACGCAGTAAGTGCCCCGCCTGGGGAGTACGGTCGCAAGGCTGAAACTCAAAGGAATTGACGGGGGCCCGCACAAGCGGTGGAGCATGTGGTTTAATTCGACGCAACGCGAAGAACCTTACCTGGGTTTGACATGTGCAGGACAGGTGATGAAAGTCACTCTCCCTTCGGGGCCTGTGCACAGGTGCTGCATGGCTGTCGTCAGCTCGTGTCGTGAGATGTTGGGTTAAGTCCCGCAACGA	0	0	94	1136	0	323	317	1604	802	894	593	0	502	249	447	0	1336	2271	539	457	1149	1037	0	0	1342	1615	0	0	0	0	0	82	920	1098	0	0	0	0	112	266	130	172	129	175	991	199
5206ccd490edf874d7c0c68fc1cfbe0c	bASV327	d__Bacteria; p__Proteobacteria; c__Alphaproteobacteria; o__Rhizobiales; f__Rhodomicrobiaceae; g__Rhodomicrobium	GTAGTCCACGCTGTAAACTATGGATGCTAGCCGTTGGGGAGCTTGCTCTTCAGTGGCGCAGCTAACGTCTTAAGCATCCCGCCTGGGGAGTACGGTCGCAAGATTAAAACTCAAAGGAATTGACGGGGGCCCGCACAAGCGGTGGAGCATGTGGTTTAATTCGAGGCAACGCGAAGAACCTTACCAGCTCTTGACATGCCGTGCTACGTGGAGAGATTCACGGTTCCCTTCGGGGACGCGGACACAGGTGCTGCATGGCTGTCGTCAGCTCGTGTCGTGAGATGTTGGGTTAAGTCCCGCAACGAG	0	0	0	0	0	60	0	0	0	41	0	0	77	153	0	0	0	0	0	0	0	0	5640	867	0	0	70	122	1100	333	146	271	0	0	64	1125	0	0	0	0	0	39	66	68	0	0
869d0574c35b0af1d04d681f035466b1	bASV328	d__Bacteria; p__Proteobacteria; c__Gammaproteobacteria; o__Xanthomonadales; f__Xanthomonadaceae	GTAGTCCACGCCCTAAACGATGCGAACTGGATGTTGGGTGCAACTAGGCACTCAGTATCGAAGCTAACGCGTTAAGTTCGCCGCCTGGGGAGTACGGTCGCAAGACTGAAACTCAAAGGAATTGACGGGGGCCCGCACAAGCGGTGGAGTATGTGGTTTAATTCGATGCAACGCGAAGAACCTTACCTGGCCTTGACATCCACGGAACTTTCCAGAGATGGATTGGTGCCTTCGGGAACCGTGAGACAGGTGCTGCATGGCTGTCGTCAGCTCGTGTCGTGAGATGTTGGGTTAAGTCCCGCAACG	109	176	0	333	547	251	103	403	245	612	129	52	456	202	253	0	0	346	116	202	435	185	446	55	382	779	60	92	446	408	232	217	116	142	202	608	422	0	104	325	215	72	97	194	86	157
78afb33b9a79066097bbf11403d81df4	bASV329	d__Bacteria; p__Proteobacteria; c__Gammaproteobacteria; o__PLTA13; f__PLTA13; g__PLTA13; s__uncultured_bacterium	GTAGTCCACGCCATAAACGATGAGAACTAGATGTCGAGAGGGTTAGCCTCACGGTGTCGCAGCTAACGCGTTAAGTTCTCCGCCTGGGGAGTACGGCCGCAAGGTTGAAACTCAAAGGAATTGACGGGGACCCGCACAAGCGGTGGAGCATGTGGTTCAATTCGATGCAACGCGAAGAACCTTACCTGGCCTTGACATCCTCGGAACTTGGCAGAGATGCCTTGGTGCCTTCGGGAACCGAGAGACAGGTGCTGCATGGCTGTCGTCAGCTCGTGTCGTGAGATGTTGGGTTAAGTCCCGCAACGA	0	0	58	2656	0	2316	305	3356	1438	1501	1180	0	2268	580	297	0	259	2250	352	591	2234	2022	5	0	2258	1608	0	0	27	0	0	19	475	746	0	0	0	0	17	42	19	19	18	6	333	746
b554a1c2b88ec803f8e24967d3f8cdad	bASV330	d__Bacteria; p__Actinobacteriota; c__Thermoleophilia; o__Gaiellales; f__Gaiellaceae; g__Gaiella	GTAGTCCACGCCGTAAACGATGGGTGCTAGGTGTGGGAGGTGTCGACTCCTTCCGTGCCGTAGCTAACGCATTAAGCACCCCGCCTGGGGAGTACGGCCGCAAGGCTAAAACTCAAAGGAATTGACGGGGCCCCGCACAAGCAGCGGAGCATGTTGTTTAATTCGATGCAACGCGAAGAACCTTACCAGGGCTTGACATGCACTGGAAATCCGTAGAAATACGGCCCTCCTTCGGGACCAGTGCACAGGTGGTGCATGGCTGTCGTCAGCTCGTGTCGTGAGATGTTGGGTTAAGTCCCGCAACGA	1629	197	766	379	0	198	0	459	251	0	0	463	186	0	378	0	0	1044	0	51	125	0	0	0	140	0	0	0	0	0	0	124	0	0	324	0	0	0	637	1668	1427	70	165	339	626	186
20245bfb7a010a1fd50cce4a05611ee8	bASV331	d__Bacteria; p__Actinobacteriota; c__Acidimicrobiia; o__IMCC26256; f__IMCC26256; g__IMCC26256; s__uncultured_Acidimicrobiia	GTAGTCCACGCCGTAAACGTTGGGCACTAGGTGTGGGACTCTATCGACGGGTTCCGTGCCGTAGCTAACGCATTAAGTGCCCCGCCTGGGGAGTACGGCCGCAAGGCTAAAACTCAAAGGAATTGACGGGGGCCCGCACAAGCGGCGGAGCATGTGGCTTAATTCGATGCGACGCGAAGAACCTTACCTGGGTTTGACATGTAGGGAAAAGCCGTAGAGATACGGTGTCCTTCGGGGTCCTACACAGGTGGTGCATGGCTGTCGTCAGCTCGTGTCGTGAGATGTTGGGTTAAGTCCCGCAACGAG	266	119	86	141	1222	178	0	199	71	113	76	174	494	252	280	0	0	174	0	0	59	74	762	104	0	0	302	222	1130	0	145	266	83	0	232	1288	0	0	218	524	440	760	702	1052	59	179
c0e43bbb267e9c6ebff640048fd5ab1e	bASV332	d__Bacteria; p__Proteobacteria; c__Alphaproteobacteria; o__Rhizobiales; f__Xanthobacteraceae; g__Pseudorhodoplanes	GTAGTCCACGCTGTAAACGATGGATGCTAGCCGTTGGCGGGTTTACTCGTCAGTGGCGCAGCTAACGCATTAAGCATCCCGCCTGGGGAGTACGGTCGCAAGATTAAAACTCAAAGGAATTGACGGGGGCCCGCACAAGCGGTGGAGCATGTGGTTCAATTCGAAGCAACGCGCAGAACCTTACCAACCTTTGACATGTCCCGTATGAGCACCAGAGATGGAGCTCTTCAGTTCGGCTGGCGGGAACACAGGTGCTGCATGGCTGTCGTCAGCTCGTGTCGTGAGATGTTGGGTTAAGTCCCGCAA	121	120	303	145	496	484	0	126	109	191	208	122	515	155	335	0	0	262	78	171	129	165	320	20	151	0	77	74	247	0	176	227	232	146	169	360	151	111	57	148	140	150	275	494	248	113
67d8e599ffb0f0958990f6e2a2c33010	bASV333	d__Bacteria; p__Acidobacteriota; c__Acidobacteriae; o__Subgroup_2; f__Subgroup_2; g__Subgroup_2	GTAGTCCTAGCCCTAAACGATCAGGACTTGGGGTGCCGCCCGTTCGGGCGTCGTCCCGGAGCTAACGCGTTAAGTCCTGCACCTGGGGAGTACGGTCGCAAGACTGAAACTCAAAGGAATTGACGGGGGCCCGCACAAGCGGTGGAACATGTGGTTCAATTCGACGCTACGCGAGGAACCTTACCTGGGCTCGAAATGCTAGTGACCAGCTTTAGAAATATTGCCTTCCCGCAAGGGACACTAGTATAGGCGCTGCATGGCTGTCGTCAGCTCGTGCCGTGAGGTGTTGGGTTAAGTCCCGCAACG	0	0	0	0	0	1065	0	0	0	0	0	0	878	0	0	0	0	0	0	0	0	0	0	0	0	0	0	0	0	0	0	0	0	0	0	0	26	0	0	0	0	0	0	0	0	0
429db139945c4b282ae48ebb17cdda8b	bASV334	d__Bacteria; p__Proteobacteria; c__Gammaproteobacteria; o__Enterobacterales; f__Enterobacteriaceae; g__Escherichia-Shigella	GTAGTCCACGCCGTAAACGATGTCGACTTGGAGGTTGTGCCCTTGAGGCGTGGCTTCCGGAGCTAACGCGTTAAGTCGACCGCCTGGGGAGTACGGCCGCAAGGTTAAAACTCAAATGAATTGACGGGGGCCCGCACAAGCGGTGGAGCATGTGGTTTAATTCGATGCAACGCGAAGAACCTTACCTGGTCTTGACATCCACGGAAGTTTTCAGAGATGAGAATGTGCCTTCGGGAACCGTGAGACAGGTGCTGCATGGCTGTCGTCAGCTCGTGTTGTGAAATGTTGGGTTAAGTCCCGCAACGA	67	0	2014	29	0	39	14	42	0	0	0	33	268	0	55	0	0	36	0	30	24	66	107	56	25	0	0	29	101	0	57	80	0	20	42	0	177	165	71	70	35	35	31	31	92	24
8d42973065d4891e7f11b875833cfd8f	bASV335	d__Bacteria; p__Proteobacteria; c__Gammaproteobacteria; o__Burkholderiales; f__SC-I-84; g__SC-I-84	GTAGTCCACGCCCTAAACGATGGCAACTGGGTGTTGGGGAAGCGATTTCTCAGTACCGTAGCTAACGCGTGAAGTTGCCCGCCTGGGGAGTACGGCCGCAAGGTTAAAACTCAAAGGAATTGACGGGGACCCGCACAAGCGGTGGATGATGTGGATTAATTCGATGCAACGCGAACAACCTTACCTACCCTTGACATGTCCGGAACCCCATCGAGAGGTGGGGGTGCCCGAAAGGGAATCGGAACACAGGTGCTGCATGGCTGTCGTCAGCTCGTGTCGTGAGATGTTGGGTTAAGTCCCGCAACG	0	0	20	542	1147	524	181	983	336	86	190	0	1601	319	46	0	225	1571	202	189	291	326	1086	115	270	496	257	183	817	149	226	166	186	199	143	540	20	6	0	0	0	15	32	24	18	252
1b40ef0377a33688cda866a1428b4e8c	bASV336	d__Bacteria; p__Acidobacteriota; c__Acidobacteriae; o__Subgroup_2; f__Subgroup_2; g__Subgroup_2	GTAGTCCTAGCCCTAAACGATCAGGACTTGGGGTGCCTTCCGTTCGGAAGTCGTCCCGGAGCTAACGCGTTAAGTCCTGCACCTGGGGAGTACGGTCGCAAGACTGAAACTCAAAGGAATTGACGGGGGCCCGCACAAGCGGTGGAACATGTGGTTCAATTCGACGCTACGCGAGGAACCTTACCTGGGCTCGAAATGCTTCTGACCAGCTGTAGAAATACGGCCTTCCCGCAAGGGACAGGAGTATAGGCGCTGCATGGCTGTCGTCAGCTCGTGCCGTGAGGTGTTGGGTTAAGTCCCGCAACG	0	0	0	0	0	0	0	0	0	0	0	0	0	0	0	0	0	0	0	0	0	0	0	0	0	0	0	0	0	0	78	0	0	0	0	0	29	66	0	0	0	0	0	0	0	0
17f50a58d569edcc743bb72ea0d1bcb3	bASV337	d__Bacteria; p__Actinobacteriota; c__Actinobacteria; o__Propionibacteriales; f__Nocardioidaceae; g__Marmoricola	GTAGTCCACACCGTAAACGTTGGGCGCTAGGTGTGGGACTCATTCCACGAGTTCCGTGCCGCAGCTAACGCATTAAGCGCCCCGCCTGGGGAGTACGGCCGCAAGGCTAAAACTCAAAGGAATTGACGGGGGCCCGCACAAGCGGCGGAGCATGCGGATTAATTCGATGCAACGCGAAGAACCTTACCTAGGTTTGACATATACGAGAAGCCTCTAGAGATAGAGGTCTCTTTGGACACTCGTATACAGGTGGTGCATGGCTGTCGTCAGCTCGTGTCGTGAGATGTTGGGTTAAGTCCCGCAACG	0	175	352	194	643	112	0	255	100	367	0	165	280	0	147	0	0	253	95	55	167	260	369	85	176	0	0	160	228	0	0	0	121	0	147	256	272	41	0	173	183	312	326	367	120	50
726fb8c4dee06a5cbf057d8a5187dd77	bASV338	d__Bacteria; p__Acidobacteriota; c__Acidobacteriae; o__Acidobacteriales; f__uncultured; g__uncultured	GTAGTCCTAGCCCTAAACGATGATTGCTTGGTGTGTCGGGTACCCAATCCCGCCGTGCCGAAGCTAACGCGATAAGCAATCCGCCTGGGGAGTACGGTCGCAAGACTGAAACTCAAAGGAATTGACGGGGGCCCGCACAAGCGGTGGAGCATGTGGTTCAATTCGACGCAACGCGAAGAACCTTACCTGGGCTCGAAATGTAGTGGACCGGGGTGGAAACATCCCTTCCCGCAAGGGCTGCTATATAGGTGCTGCATGGCTGTCGTCAGCTCGTGTCGTGAGATGTTGGGTTAAGTCCCGCAACGA	0	0	0	504	1249	917	50	920	349	39	0	0	612	129	0	0	0	819	80	98	101	263	1008	1524	89	414	34	59	34	0	232	0	152	149	0	604	75	89	0	0	0	0	22	26	0	106
ae81b8c1b0129b3f4c6663745c1638f6	bASV339	d__Bacteria; p__Proteobacteria; c__Gammaproteobacteria; o__Burkholderiales; f__Nitrosomonadaceae; g__MND1	GTAGTCCACGCCCTAAACGATGATGACTAGTTGTTGGGGGAGTTAAATCCCTTAGTAACGCAGCTAACGCGTGAAGTCATCCGCCTGGGGAGTACGGTCGCAAGATTAAAACTCAAAGGAATTGACGGGGGCCCGCACAAGCGGTGGATGATGTGGTTTAATTCGATGCAACGCGAAAAACCTTACCTACCCTTGACATGCCAGGAACGCTCCAGAAATGGGGCGGTGCCCGAAAGGGAACCTGGACACAGGTGCTGCATGGCTGTCGTCAGCTCGTGTCGTGAGATGTTGGGTTAAGTCCCGCAA	303	0	123	0	0	0	0	0	0	0	0	100	0	0	0	0	0	0	0	0	0	0	0	0	0	0	0	0	0	642	156	800	0	0	688	0	0	0	208	573	490	0	0	0	52	0
5af195a7c87d45a7acbdeabfdb17ed2a	bASV340	d__Bacteria; p__Proteobacteria; c__Alphaproteobacteria; o__Rhizobiales; f__Rhizobiaceae; g__Mesorhizobium	GTAGTCCACGCCGTAAACGATGGAAGCTAGCCGTTGGCAAGTTTACTTGTCGGTGGCGCAGCTAACGCATTAAGCTTCCCGCCTGGGGAGTACGGTCGCAAGATTAAAACTCAAAGGAATTGACGGGGGCCCGCACAAGCGGTGGAGCATGTGGTTTAATTCGAAGCAACGCGCAGAACCTTACCAGCCCTTGACATCCCGGTCGCGGTTTCCAGAGATGGATACCTTCAGTTCGGCTGGACCGGTGACAGGTGCTGCATGGCTGTCGTCAGCTCGTGTCGTGAGATGTTGGGTTAAGTCCCGCAA	170	284	81	433	0	184	54	587	172	342	433	84	87	181	261	0	0	1109	132	103	495	152	0	0	236	0	0	0	144	0	62	40	0	0	80	0	197	0	0	0	0	67	91	83	340	318
6ade4281b3c56e202630552ac3d3e2df	bASV341	d__Bacteria; p__Actinobacteriota; c__Actinobacteria; o__Micrococcales; f__Micrococcaceae; g__Arthrobacter	GTAGTCCATGCCGTAAACGTTGGGCACTAGGTGTGGGGGACATTCCACGTTTTCCGCGCCGTAGCTAACGCATTAAGTGCCCCGCCTGGGGAGTACGGCCGCAAGGCTAAAACTCAAAGGAATTGACGGGGGCCCGCACAAGCGGCGGAGCATGCGGATTAATTCGATGCAACGCGAAGAACCTTACCAAGGCTTGACATGGGCCGGACCGGGCTGGAAACAGTCCTTCCCTTCGGGGCCGGTTCACAGGTGGTGCATGGTTGTCGTCAGCTCGTGTCGTGAGATGTTGGGTTAAGTCCCGCAACG	1724	181	3209	414	0	207	0	825	323	734	324	389	0	176	0	0	413	357	0	311	590	2128	0	0	725	2034	0	0	0	0	0	27	0	247	105	0	0	0	0	80	72	126	108	132	191	65
02ac27e9134b4e678289e251b7e26aea	bASV342	d__Bacteria; p__Proteobacteria; c__Gammaproteobacteria; o__Burkholderiales; f__SC-I-84; g__SC-I-84	GTAGTCCACGCCCTAAACGATGCTCACTAGGTGTTGGGGAAGCGATTCCTTGGTACCGTAGCTAACGCGTGAAGTGAGCCGCCTGGGGAGTACGGCCGCAAGGTTAAAACTCAAAGGAATTGACGGGGACCCGCACAAGCGGTGGATGATGTGGATTAATTCGATGCAACGCGAACAACCTTACCTACCCTTGACATGTCTGGAAGGCTGCTGAAAGGCGGCTGTGCCCGAAAGGGAACCGGAACACAGGTGCTGCATGGCTGTCGTCAGCTCGTGTCGTGAGATGTTGGGTTAAGTCCCGCAACG	630	157	196	0	913	137	0	204	0	294	0	140	217	279	399	0	0	328	0	121	105	261	1997	95	0	1194	245	292	1297	572	203	208	0	0	443	1235	375	95	160	309	293	131	76	285	392	0
a161464670e0f2114b40586ffab4962e	bASV343	d__Bacteria; p__Proteobacteria; c__Alphaproteobacteria; o__Rhizobiales; f__Xanthobacteraceae; g__uncultured; s__uncultured_Pseudolabrys	GTAGTCCACGCCGTAAACGATGGATGCTAGCCGTTGGCGGGTTTACCCGTCAGTGGCGCAGCTAACGCTTTAAGCATCCCGCCTGGGGAGTACGGTCGCAAGATTAAAACTCAAAGGAATTGACGGGGGCCCGCACAAGCGGTGGAGCATGTGGTTCAATTCGACGCAACGCGCAGAACCTTACCAGCCCTTGACATCCCGGTCGCGGGAACGAGAGATCGATCCCTTCAGTTCGGCTGGACCGGAGACAGGTGCTGCATGGCTGTCGTCAGCTCGTGTCGTGAGATGTTGGGTTAAGTCCCGCAA	0	0	28	612	0	972	146	855	266	220	0	0	1335	552	303	0	1238	825	208	254	322	515	176	91	279	350	154	252	1188	0	0	68	171	160	0	0	56	0	0	0	0	136	145	404	58	280
022432ded5a492629292e03f2a5df0e7	bASV344	d__Bacteria; p__Proteobacteria; c__Alphaproteobacteria; o__Rhizobiales; f__KF-JG30-B3; g__KF-JG30-B3; s__uncultured_bacterium	GTAGTCCACGCCGTAAACGATGGATGCTAGCCGTTGGTAAGCATGCTTATCAGTGGCGCAGCTAACGCATTAAGCGTCCCGCCTGGGGAGTACGGCCGCAAGGTTGAAACTCAAAGGAATTGACGGGGGCCCGCACAAGCGGTGGAGCATGTGGTTTAATTCGACGCAACGCGCAGAACCTTACCAGGGTTTGACATCCCGTGCCACGCTCAGAGATGGGCGGTCCCCGCAAGGGGCGCGGAGACAGGTGCTGCATGGCTGTCGTCAGCTCGTGTCGTGAGATGTTGGGTTAAGTCCCGCAACGAG	647	98	219	718	0	176	0	897	407	212	265	122	184	199	0	0	0	677	34	128	467	0	0	0	607	261	0	0	154	2156	645	1734	139	299	448	261	0	0	680	1413	686	223	641	1264	712	431
c37abf360cdd54f0d8f80686b644c4c6	bASV345	d__Bacteria; p__Proteobacteria; c__Alphaproteobacteria; o__Sphingomonadales; f__Sphingomonadaceae; g__Sphingomonas	GTAGTCCACGCCGTAAACGATGATGACTAGCTGTCTGGGCGCTTAGCGTTCAGGTGGCGCAGCTAACGCGTTAAGTCATCCGCCTGGGGAGTACGGCCGCAAGGTTAAAACTCAAAGAAATTGACGGGGGCCTGCACAAGCGGTGGAGCATGTGGTTTAATTCGAAGCAACGCGCAGAACCTTACCAGCGTTTGACATGGTAGGACGGTTTCCAGAGATGGATTCCTTCCCTTACGGGACCTACACACAGGTGCTGCATGGCTGTCGTCAGCTCGTGTCGTGAGATGTTGGGTTAAGTCCCGCAAC	0	0	0	0	1605	151	0	0	0	0	0	0	591	0	0	0	0	0	0	0	0	0	2379	105	0	0	171	120	281	0	62	0	0	0	0	1091	3215	842	0	0	0	383	174	241	0	0
2c6cbc61ac429e3e98ffbb261f2d0493	bASV346	d__Bacteria; p__Actinobacteriota; c__Thermoleophilia; o__Gaiellales; f__uncultured; g__uncultured; s__uncultured_Rubrobacterales	GTAGTCCACGCCGTAAACGATGGGAACTAGGTGTGGGCGGTGTCGACTCCGTCCGTGCCGAAGCTAACGCATTAAGTTCCCCGCCTGGGGAGTACGGCCGCAAGGCTAAAACTCAAAGGAATTGACGGGGGCCCGCACAAGCAGCGGAGCATGTGGTTCAATTCGACGCAACGCGAAGAACCTTACCTAGGCTTGACATGCACTGGAATTGCATAGAAATATGTAAGCCCTTCGGGGCTAGTGCACAGGTGGTGCATGGCTGTCGTCAGCTCGTGTCGTGAGATGTTGGGTTAAGTCCCGCAACGA	377	0	153	1112	0	734	152	1990	743	95	0	145	890	243	396	0	0	1458	275	195	181	525	259	38	162	0	51	81	1067	426	245	382	151	190	435	551	0	0	135	287	301	355	438	732	165	312
c8307044a1cc56dfa91cedec281112ae	bASV347	d__Bacteria; p__Proteobacteria; c__Alphaproteobacteria; o__Rhizobiales; f__Rhizobiaceae; g__Allorhizobium-Neorhizobium-Pararhizobium-Rhizobium	GTAGTCCACGCCGTAAACGATGAATGTTAGCCGTCGGGCAGTATACTGTTCGGTGGCGCAGCTAACGCATTAAACATTCCGCCTGGGGAGTACGGTCGCAAGATTAAAACTCAAAGGAATTGACGGGGGCCCGCACAAGCGGTGGAGCATGTGGTTTAATTCGAAGCAACGCGCAGAACCTTACCAGCCCTTGACATCCTACGACCGCTGCAGAGATGCAGTTTCCACTTCGGTGGCGTAGAGACAGGTGCTGCATGGCTGTCGTCAGCTCGTGTCGTGAGATGTTGGGTTAAGTCCCGCAACGAG	0	0	0	58	212	59	0	345	45	112	0	0	0	27	0	0	0	42	0	49	45	65	47	14	62	0	0	44	154	0	21	0	54	0	0	218	1371	213	0	0	0	43	0	41	52	30
ffdb89f649d46ee2bc1bd9a2990858a0	bASV348	d__Bacteria; p__Proteobacteria; c__Gammaproteobacteria; o__Burkholderiales; f__TRA3-20; g__TRA3-20	GTAGTCCACGCCCTAAACGATGTCAACTGGTTGTCGGGGGAGTAATCCCTTGGTAACGAAGCTAACGCGTGAAGTTGACCGCCTGGGGAGTACGGCCGCAAGGCTAAAACTCAAAGGAATTGACGGGGACCCGCACAAGCGGTGGATTATGTGGATTAATTCGATGCAACGCGAAAAACCTTACCTACCCTTGACATGCTAGGAAGCTCGCAGAGATGTGAGTGTGCCCGAAAGGGAACCTAGACACAGGTGCTGCATGGCTGTCGTCAGCTCGTGTCGTGAGATGTTGGGTTAAGTCCCGCAACG	219	0	102	182	844	412	91	409	151	447	456	51	1411	429	265	0	315	1255	108	267	490	606	202	16	560	485	121	146	605	525	341	385	333	433	204	0	0	12	92	226	187	133	79	232	191	270
31d497f4423f692578e2fdbf9d375bf1	bASV349	d__Bacteria; p__Chloroflexi; c__AD3; o__AD3; f__AD3; g__AD3; s__uncultured_Thermomicrobia	GTAGTCCACGCCCTAAACGTTGCGAACTAGGTGTTGGCGAGATTGACCTCGTCAGTGCCGCAGCTAACGCATTAAGTTCGCCGCCTGGGAAGTACGGTCGCAAGATTAAAACTCAAAGGAATAGGCGGGGGCCCGCACAAGCAGCGGAGCGTGTTCTTTAATTCGATGCGACGCGAAGAACCTTACCTGGGCTTGACATGTTTCGGAAAGATCGGTGAAAGCCGGTCCTCCTCGCAAGAGGCCGTTGCACAGGTGGTGCATGGCTGTCGTCAGCTCGTGCCGTGAGGTGTTGGGTTAAGTCCCGCA	0	0	0	0	104	0	0	0	0	0	0	0	0	0	0	0	0	0	17	0	0	0	32	0	0	0	0	0	13	0	0	0	0	0	0	87	0	0	0	0	0	0	0	0	6	0
bf2db8dd7c203e71363bab583f059dfc	bASV350	d__Bacteria; p__Proteobacteria; c__Alphaproteobacteria; o__Rhizobiales; f__Xanthobacteraceae; g__uncultured; s__Afipia_sp.	GTAGTCCACGCCGTAAACGATGAATGCTAGCCGTTGGTGGGTTTACCCTTCAGTGGCGCAGCTAACGCTTTAAGCATTCCGCCTGGGGAGTACGGTCGCAAGATTAAAACTCAAAGGAATTGACGGGGGCCCGCACAAGCGGTGGAGCATGTGGTTTAATTCGACGCAACGCGCAGAACCTTACCAGCTCTTGACATGTCCAGGACCGGTCGCAGAGATGCGGTCTTCCCTTCGGGGCCTGGAACACAGGTGCTGCATGGCTGTCGTCAGCTCGTGTCGTGAGATGTTGGGTTAAGTCCCGCAACG	188	112	288	150	478	124	48	212	63	324	192	123	87	73	106	0	429	274	92	138	262	131	147	42	167	0	69	77	350	521	84	198	139	129	289	593	113	65	282	741	345	283	303	540	519	55
d78c2f9073e250f3e26478d4fdcc0483	bASV351	d__Bacteria; p__Proteobacteria; c__Alphaproteobacteria; o__Rhizobiales; f__Xanthobacteraceae; g__Bradyrhizobium	GTAGTCCACGCCGTAAACGATGAATGCCAGCCGTTAGTGGGTTTACTCACTAGTGGCGCAGCTAACGCTTTAAGCATTCCGCCTGGGGAGTACGGTCGCAAGATTAAAACTCAAAGGAATTGACGGGGGCCCGCACAAGCGGTGGAGCATGTGGTTTAATTCGACGCAACGCGCAGAACCTTACCAGCCCTTGACATGTCCAGGACCGGTCGCAGAGACGTGACCTTCTCTTCGGAGCCTGGAACACAGGTGCTGCATGGCTGTCGTCAGCTCGTGTCGTGAGATGTTGGGTTAAGTCCCGCAACG	0	0	62	120	0	90	0	101	0	0	0	0	175	0	0	0	0	79	0	0	0	0	2185	964	0	0	258	163	320	0	55	0	0	0	2170	0	783	360	0	0	0	191	248	179	0	0
a8e4d7194a387383241d33aeb17afcff	bASV352	d__Bacteria; p__Bacteroidota; c__Bacteroidia; o__Flavobacteriales; f__Flavobacteriaceae; g__Flavobacterium	GTAGTCCACGCCGTAAACGATGGATACTAGCTGTTCGAGAGCAATCTTGAGTGGCTAAGCGAAAGTGATAAGTATCCCACCTGGGGAGTACGTTCGCAAGAATGAAACTCAAAGGAATTGACGGGGGCCCGCACAAGCGGTGGAGCATGTGGTTTAATTCGATGATACGCGAGGAACCTTACCAAGGCTTAAATGTAGATTGACAGGACTGGAAACAGTTTTTTCTTCGGACAATTTACAAGGTGCTGCATGGTTGTCGTCAGCTCGTGCCGTGAGGTGTCAGGTTAAGTCCTATAACGAGCGCAA	650	0	250	414	4019	1465	0	0	228	0	0	115	14705	541	1174	0	0	0	0	0	0	406	264	103	0	796	565	456	1742	0	157	364	0	479	158	0	104	0	0	12	0	108	167	91	336	390
3e4d9a8ffac2c461c7b363c6ade86f1c	bASV353	d__Bacteria; p__Actinobacteriota; c__Actinobacteria; o__Frankiales; f__Nakamurellaceae; g__Nakamurella	GTAGTCCACGCCGTAAACGTTGGGCGCTAGGTGTGGGGGTCCTTCCACGATCTCCGTGCCGCAGCTAACGCATTAAGCGCCCCGCCTGGGGAGTACGGCCGCAAGGCTAAAACTCAAAGGAATTGACGGGGGCCCGCACAAGCGGCGGAGCATGCGGATTAATTCGATGCAACGCGAAGAACCTTACCAAGGCTTGACATGCACGGGTAAGTTCCAGAGATGGTTCCCCCGTAAGGTCCGTGCACAGGTGGTGCATGGTTGTCGTCAGCTCGTGTCGTGAGATGTTGGGTTAAGTCCCGCAACGAG	4474	167	326	203	694	421	64	348	87	264	317	1084	107	380	285	0	0	147	73	77	92	895	433	107	0	858	118	128	448	0	82	83	115	83	188	527	0	0	707	2105	1766	269	177	280	172	139
080f48dfe7c3868a46da7b6f7ed35010	bASV354	d__Bacteria; p__Acidobacteriota; c__Acidobacteriae; o__Acidobacteriales; f__uncultured; g__uncultured	GTAGTCCTAGCCCTAAACGATGATTGCTTGGTGTAGCAGGTACCCAATCCTGCTGTGCCGCAGCTAACGCGATAAGCAATCCGCCTGGGGAGTACGGTCGCAAGGCTGAAACTCAAAGGAATTGACGGGGGCCCGCACAAGCGGTGGAGCATGTGGTTCAATTCGACGCAACGCGAAGAACCTTACCTGGGCTCGAAATGCAGGAGACCGGGGTAGAAATATCCCTTTCCGCAAGGACTGCTGTATAGGTGCTGCATGGCTGTCGTCAGCTCGTGTCGTGAGATGTTGGGTTAAGTCCCGCAACGA	0	0	0	0	282	44	41	0	0	0	0	0	49	0	0	0	0	0	18	0	0	0	1940	1166	0	0	0	0	0	0	124	0	0	0	0	231	645	342	0	0	0	0	0	0	0	0
984c9f88e1ea9e4e6a8551f2c4431bd8	bASV355	d__Bacteria; p__Actinobacteriota; c__Thermoleophilia; o__Solirubrobacterales; f__Solirubrobacteraceae; g__Conexibacter	GTAGTCCACGCCGTAAACGATGGGCACTAGGTGTGGGGGGTGTCGACTCCCTCCGTGCCGACGCTAACGCATTAAGTGCCCCGCCTGGGGAGTACGGCCGCAAGGCTAAAACTCAAAGGAATTGACGGGGGCCCGCACAAGCAGCGGAGCATGTGGTTTAATTCGACGCAACGCGAAGAACCTTACCTGGGCTTGACATGTTCCTGACAGCCGTGGAAACACGGTCTCCCTTCGGGGCAGGATCACAGGTGGTGCATGGCTGTCGTCAGCTCGTGTCGTGAGATGTTGGGTTAAGTCCCGCAACGA	0	0	0	0	0	0	0	0	0	0	0	0	83	0	0	0	0	0	0	0	0	0	237	281	0	0	0	0	0	0	0	0	0	0	0	0	103	115	0	0	0	0	0	0	0	0
48a9951d9e596593da936436efe1eccf	bASV356	d__Bacteria; p__Actinobacteriota; c__Thermoleophilia; o__Gaiellales; f__uncultured; g__uncultured	GTAGTCCACGCCGTAAACGATGGGTGCTAGGTGTGGGAGGTGTCGACTCCTTCCGTGCCGAAGCTAACGCATTAAGCACCCCGCCTGGGGAGTACGGCCGCAAGGCTAAAACTCAAAGGAATTGACGGGGGCCCGCACAAGCAGCGGAGCATGTGGTTTAATTCGACGCAACGCGAAGAACCTTACCTGGGCTTGACATGCACGGGAATGTCGTAGAAATACGGCAGCCCTTCGGGGCTCGTGCACAGGTGTTGCATGGCTGTCGTCAGCTCGTGTCGTGAGATGTTGGGTTAAGTCCCGCAACGA	404	0	135	345	835	298	320	522	253	125	0	188	666	125	324	0	0	297	338	63	173	330	1041	80	199	0	114	72	791	655	172	320	0	83	315	749	0	0	240	500	360	280	540	915	187	209
869f00653c6819c7e61d1157ad59b10d	bASV358	d__Bacteria	GTAGTCCACGCTGTAAACGATGGGCACTAGGTGTCCGGGGTATTGACCCCCTGGGTGCCGCAGCTAACGCATTAAGTGCCCCGCCTGGGGAGTACGGTCGCAAGATTAAAACTCAAAGGAATTGACGGGGGCCCGCACAAGCGGTGGAGCATGTGGTTCAATTCGACGCAACGCGAAGAACCTTACCTGGGCTAGACAACGGCGGACCGTCCTAGAAATAGGATTTTCCCTTCGGGGACTGCCGGTTCAGGTGCTGCATGGCTGTCGTCAGCTCGTGCCGTGAGGTGTTGGGTTAAGTCCCGCAAC	192	0	63	1633	0	350	158	2322	1089	227	614	0	1218	304	209	0	0	517	0	255	661	536	262	0	858	0	0	0	423	0	65	0	405	679	0	0	0	0	0	0	0	122	215	279	0	934
54a1d27372e576bb40ee6ae077f16730	bASV359	d__Bacteria; p__Proteobacteria; c__Gammaproteobacteria; o__Burkholderiales; f__SC-I-84; g__SC-I-84; s__metagenome	GTAGTCCACGCCCTAAACGATGCTCACTAGGTGTTGGGGAAGCGATTCCTTGGTACCGTAGCTAACGCGTGAAGTGAGCCGCCTGGGGAGTACGGCCGCAAGGTTAAAACTCAAAGGAATTGACGGGGACCCGCACAAGCGGTGGATGATGTGGATTAATTCGATGCAACGCGAACAACCTTACCTACCCTTGACATGTCTGGAAGCCTGGTGAGAGCTGGGTGTGCCCGAAAGGGAACCGGAACACAGGTGCTGCATGGCTGTCGTCAGCTCGTGTCGTGAGATGTTGGGTTAAGTCCCGCAACG	137	0	161	48	0	247	26	118	38	240	88	84	637	393	232	0	0	720	0	77	94	297	804	48	116	680	275	231	1735	527	147	113	154	123	280	1284	19	0	134	319	250	92	95	304	0	310
a8d7a74fd191fc2f4948bf89287aee89	bASV360	d__Bacteria; p__Myxococcota; c__Polyangia; o__Polyangiales; f__Polyangiaceae	GTAGTCCACGCCGTAAACGATGGGTGCTAGGTGTCGCGGGCTTTGACTCCTGCGGTGCCGTAGCTAACGCATTAAGCACCCCGCCTGGGAAGTACGGCCGCAAGGCTAAAACTCAAAGGAATTGACGGGGGCCCGCACAAGCGGTGGAGCATGTGGTTTAATTCGACGCAACGCGAAGAACCTTACCTGGGCTAGAAAATGCAGGAACCTGGGAGAAGTCTCGGGGTGCTCTTCGGAGAGCCTGTAGTTAGGTGCTGCATGGCTGTCGTCAGCTCGTGTCGTGAGATGTTGGGTTAAGTCCCGCAA	252	0	128	372	1689	283	144	435	212	296	0	163	272	216	0	0	1245	415	0	189	352	259	214	0	309	0	193	0	352	0	145	189	335	0	150	673	177	167	154	285	197	163	110	183	0	0
8c3e9039c48b4eecd8aeb4fbf24385fd	bASV361	d__Bacteria; p__Proteobacteria; c__Alphaproteobacteria; o__Rhizobiales; f__Rhizobiaceae; g__Mesorhizobium	GTAGTCCACGCCGTAAACGATGGAAGCTAGCCGTTGGCAAGTTTACTTGTCGGTGGCGCAGCTAACGCATTAAGCTTCCCGCCTGGGGAGTACGGTCGCAAGATTAAAACTCAAAGGAATTGACGGGGGCCCGCACAAGCGGTGGAGCATGTGGTTTAATTCGAAGCAACGCGCAGAACCTTACCAGCCCTTGACATCCCGGTCGCGGTTTCCAGAAATGGATACCTTCAGTTCGGCTGGACCGGTGACAGGTGCTGCATGGCTGTCGTCAGCTCGTGTCGTGAGATGTTGGGTTAAGTCCCGCAA	0	0	67	215	993	212	139	690	114	722	0	0	158	0	0	0	0	782	223	164	713	145	232	0	300	742	0	0	0	0	0	0	114	0	0	589	399	284	0	0	0	40	0	0	0	120
ea34b2dd6a6c6ff408a1b17652a7e96d	bASV362	d__Bacteria; p__Actinobacteriota; c__Actinobacteria; o__Micrococcales; f__Microbacteriaceae; g__Microbacterium	GTAGTCCACCCCGTAAACGTTGGGAACTAGTTGTGGGGTCCATTCCACGGATTCCGTGACGCAGCTAACGCATTAAGTTCCCCGCCTGGGGAGTACGGCCGCAAGGCTAAAACTCAAAGGAATTGACGGGGACCCGCACAAGCGGCGGAGCATGCGGATTAATTCGATGCAACGCGAAGAACCTTACCAAGGCTTGACATACACGAGAACGCTGCAGAAATGTAGAACTCTTTGGACACTCGTGAACAGGTGGTGCATGGTTGTCGTCAGCTCGTGTCGTGAGATGTTGGGTTAAGTCCCGCAACG	335	1018	197	54	0	179	47	42	76	91	0	145	0	146	393	0	0	60	29	100	47	240	143	78	81	0	0	103	114	0	19	42	93	47	157	0	41	0	32	62	43	25	24	62	367	44
9055e60c355f671430ad91d8143bbd99	bASV363	d__Bacteria; p__Proteobacteria; c__Gammaproteobacteria; o__Xanthomonadales; f__Xanthomonadaceae	GTAGTCCACGCCCTAAACGATGCGAACTGGATGTTGGGTGCAATTTGGCACGCAGTATCGAAGCTAACGCGTTAAGTTCGCCGCCTGGGGAGTACGGTCGCAAGACTGAAACTCAAAGGAATTGACGGGGGCCCGCACAAGCGGTGGAGTATGTGGTTTAATTCGATGCAACGCGAAGAACCTTACCTGGCCTTGACATGCACGGAACTTTCCAGAGATGGATTGGTGCCTTCGGGAACCGTGACACAGGTGCTGCATGGCTGTCGTCAGCTCGTGTCGTGAGATGTTGGGTTAAGTCCCGCAACG	82	0	113	118	197	163	210	211	78	76	0	62	573	135	0	0	716	437	223	1953	169	267	120	91	206	193	21	24	69	0	0	36	81	68	0	0	25	0	0	0	0	0	0	0	0	0
34e69029a552272527dc85c479a60fff	bASV364	d__Bacteria; p__Actinobacteriota; c__Thermoleophilia; o__Gaiellales; f__uncultured; g__uncultured	GTAGTCCACGCCGTAAACGATGGGTGCTAGGTGTAGGGGGTGTCGACTCCCTCTGTGCCGAAGCTAACGCATTAAGCACCCCGCCTGGGGAGTACGGCCGCAAGGCTAAAACTCAAAGGAATTGACGGGGGCCCGCACAAGCAGCGGAGCATGTGGTTTAATTCGACGCGACGCGAAGAACCTTACCTAGGCTTGACATGCACGGGAATGTCGTAGAAATACGGCAGCCCTTCGGGGCTCGTGCACAGGTGTTGCATGGCTGTCGTCAGCTCGTGTCGTGAGATGTTGGGTTAAGTCCCGCAACGA	0	0	0	0	1603	327	0	0	0	0	0	0	320	134	0	0	0	154	0	0	0	0	806	161	0	0	127	85	267	0	0	0	0	0	0	0	532	215	0	0	0	106	66	86	0	36
b47906472c86f1922a9ee8f3a5f33d21	bASV365	d__Bacteria; p__Acidobacteriota; c__Acidobacteriae; o__Solibacterales; f__Solibacteraceae; g__Candidatus_Solibacter	GTAGTCCACGCCCTAAACGATGCATATTTGGTGTGGGTCATTCAGTTGATCCGTGCCGGAGCTAACGCGTTAAATATGCCGCCTGGGGAGTACAGTCGCAAGGCTGAAACTCAAAGGAATTGACGGGGGCCCGCACAAGCGGTGGAGCATGTGGTTCAATTCGACGCAACGCGAAGAACCTTACCTGGGCTCGAACGGGTAGTCAACGGCGGTGGAAACATCGCTACCCCGCAAGGGGGTCTATTCGAGGTGCTGCATGGCTGTCGTCAGCTCGTGTCGTGAGATGTTGGGTTAAGTCCCGCAACG	0	0	0	328	1021	592	59	387	169	0	92	0	587	100	0	0	0	170	0	150	123	309	1199	800	116	0	143	64	109	0	28	9	26	0	0	101	218	114	0	0	0	18	0	0	0	26
fcd39ca119905f5b463012932ebc4ade	bASV366	d__Bacteria; p__Actinobacteriota; c__Actinobacteria; o__Micrococcales; f__Microbacteriaceae; g__Agromyces	GTAGTCCACGCCGTAAACGTTGGGCGCTAGATGTGGGGACCTTTCCACGGTTTCCGTGTCGTAGCTAACGCATTAAGCGCCCCGCCTGGGGAGTACGGCCGCAAGGCTAAAACTCAAAGGAATTGACGGGGGCCCGCACAAGCGGCGGAGCATGCGGATTAATTCGATGCAACGCGAAGAACCTTACCAAGGCTTGACATACACGAGAACGGGCCAGAAATGGTCAACTCTTTGGACACTCGTGAACAGGTGGTGCATGGTTGTCGTCAGCTCGTGTCGTGAGATGTTGGGTTAAGTCCCGCAACG	825	609	820	0	0	101	0	59	30	108	0	229	59	130	239	0	0	72	0	45	21	94	71	24	47	0	33	67	100	0	78	98	41	31	99	0	0	0	29	75	57	36	58	58	263	45
35150e67f63b8350b2c9b9b8ce0d24a7	bASV367	d__Bacteria; p__Proteobacteria; c__Alphaproteobacteria; o__Sphingomonadales; f__Sphingomonadaceae; g__Sphingomonas	GTAGTCCACGCCGTAAACGATGATGACTAGCTGTCTGGGCGCTTAGCGTTCAGGTGGCGCAGCTAACGCGTTAAGTCATCCGCCTGGGGAGTACGGCCGCAAGGTTAAAACTCAAAGAAATTGACGGGGGCCTGCACAAGCGGTGGAGCATGTGGTTTAATTCGAAGCAACGCGCAGAACCTTACCAGCGTTTGACATGCCAGGACGGTTTCCAGAGATGGATTCCTTCCCTTACGGGACCTGGACACAGGTGCTGCATGGCTGTCGTCAGCTCGTGTCGTGAGATGTTGGGTTAAGTCCCGCAAC	0	0	0	81	0	72	56	145	63	68	0	0	241	82	0	0	0	181	123	68	0	632	2219	172	0	593	80	74	117	0	161	206	0	0	66	661	2191	794	84	80	110	471	320	378	0	0
48a4e06b16ee06873ed1fd6331558dd2	bASV368	d__Bacteria; p__Proteobacteria; c__Gammaproteobacteria; o__Burkholderiales; f__Burkholderiaceae; g__Burkholderia-Caballeronia-Paraburkholderia	GTAGTCCACGCCCTAAACGATGTCAACTAGTTGTTGGGGATTCATTTCCTTAGTAACGTAGCTAACGCGTGAAGTTGACCGCCTGGGGAGTACGGTCGCAAGATTAAAACTCAAAGGAATTGACGGGGACCCGCACAAGCGGTGGATGATGTGGATTAATTCGATGCAACGCGAAAAACCTTACCTACCCTTGACATGGTCGGAACCCTGCTGAAAGGTGGGGGTGCTCGAAAGAGAACCGGCGCACAGGTGCTGCATGGCTGTCGTCAGCTCGTGTCGTGAGATGTTGGGTTAAGTCCCGCAACG	0	0	0	45	802	190	61	96	0	164	0	0	127	0	0	0	1812	99	58	114	179	1200	165	57	192	265	0	0	0	0	0	0	46	0	0	0	243	0	0	0	0	29	73	65	0	0
3c8bd7e8b899a21df3ec9e2389689ad8	bASV369	d__Bacteria; p__Proteobacteria; c__Alphaproteobacteria; o__Rhizobiales; f__Devosiaceae; g__Devosia	GTAGTCCACGCCGTAAACTATGAGAGCTAGCCGTTGGAGGATTTATCCTTCAGTGGCGCAGCTAACGCATTAAGCTCTCCGCCTGGGGAGTACGGTCGCAAGATTAAAACTCAAAGGAATTGACGGGGGCCCGCACAAGCGGTGGAGCATGTGGTTTAATTCGAAGCAACGCGAAGAACCTTACCAGCCCTTGACATGGTCGGACGGTTACCAGAGATGGTTTCCTTCACTTCGGTGACTGACACACAGGTGCTGCATGGCTGTCGTCAGCTCGTGTCGTGAGATGTTGGGTTAAGTCCCGCAACG	141	292	236	109	0	71	33	131	44	158	69	114	50	289	107	0	0	384	53	49	228	0	79	0	423	0	80	59	135	0	66	53	114	77	309	0	144	47	75	203	59	223	215	110	107	64
9073ca3302250c160be3bffae918b13f	bASV370	d__Bacteria; p__Proteobacteria; c__Alphaproteobacteria; o__Rhizobiales; f__Hyphomicrobiaceae; g__Hyphomicrobium	GTAGTCCACGCCGTAAACGATGGATGCTAGCCGTCGGATAGCTTGCTATTCGGTGGCGCAGCTAACGCATTAAGCATCCCGCCTGGGGAGTACGGCCGCAAGGTTAAAACTCAAAGGAATTGACGGGGGCCCGCACAAGCGGTGGAGCATGTGGTTTAATTCGACGCAACGCGAAGAACCTTACCAGCTCTTGACATTCACTGATCGCCTGGAGAGATCCGGGAGTCCCAGCAATGGGCAGTGGGACAGGTGCTGCATGGCTGTCGTCAGCTCGTGTCGTGAGATGTTGGGTTAAGTCCCGCAACG	0	0	0	72	2569	47	1496	50	77	0	0	0	860	78	0	0	0	168	724	123	0	321	2054	271	0	0	96	48	70	0	72	35	0	0	0	209	518	187	0	0	0	0	22	44	0	38
003953bb0770c6a1f1e701f654a3356c	bASV371	d__Bacteria; p__Chloroflexi; c__TK10; o__TK10; f__TK10; g__TK10	GTAGTCCACGCCGTAAACGATGTCGACTAGGTGTCGGGGGTATCGACCCCCTCGGCGCCGCAGCTAACGCATTAAGTCGACCGCCTGGGGACTACGGCCGCAAGGCTAAAACTCAAAGGAATTGACGGGGGCCCGCACAAGCAGCGGAGCGTGTGGTTTAATTCGATGCAACGCGCAGAACCTTACCTCGGCTTGACATGCACGTGGTACTGATCCGAAAGGAAAGGGACCCGCGAGGGAGCGTGCACAGATGCTGCATGGCTGTCGTCAGCTCGTGCCGTGAGGTGTTGGGTTAAGTCCCGCAAC	0	0	0	0	808	111	79	56	0	0	0	0	265	0	0	0	0	0	184	0	0	173	137	269	0	0	0	0	0	0	0	0	0	0	0	0	0	11	0	0	0	29	35	50	0	0
4cefd65c9991df4471c744c7ca2e3cb0	bASV372	d__Bacteria; p__Proteobacteria; c__Gammaproteobacteria; o__Pseudomonadales; f__Pseudomonadaceae; g__Pseudomonas	GTAGTCCACGCCGTAAACGATGTCAACTAGCCGTTGGGGTCCTTGAGACTTTAGTGGCGCAGCTAACGCATTAAGTTGACCGCCTGGGGAGTACGGCCGCAAGGTTAAAACTCAAATGAATTGACGGGGGCCCGCACAAGCGGTGGAGCATGTGGTTTAATTCGAAGCAACGCGAAGAACCTTACCAGGCCTTGACATGCAGAGAACTTTCCAGAGATGGATTGGTGCCTTCGGGAACTCTGACACAGGTGCTGCATGGCTGTCGTCAGCTCGTGTCGTGAGATGTTGGGTTAAGTCCCGTAACGA	0	0	0	0	0	0	0	0	0	0	0	0	68	0	0	0	0	0	0	0	0	0	0	40	0	0	0	0	0	0	0	0	0	0	0	0	0	0	0	0	0	0	0	0	0	0
80a691a465b17b0c652e20dcee236bbc	bASV373	d__Bacteria; p__Proteobacteria; c__Alphaproteobacteria; o__Dongiales; f__Dongiaceae; g__Dongia	GTAGTCCACGCCGTAAACGATGAATGCTAGACGTTGGCGAGCATGCTCGTCAGTGTCGGAGCTAACGCATTAAGCATTCCGCCTGGGGAGTACGGTCGCAAGATTAAAACTCAAAGGAATTGACGGGGGCCCGCACAAGCGGTGGAGCATGTGGTTTAATTCGAAGCAACGCGCAGAACCTTACCAACCCTTGACATGGGGAGTATGGGCTGGAGAGATCCGGTCCTTCAGTTCGGCTGGCTCCCACACAGGTGCTGCATGGCTGTCGTCAGCTCGTGTCGTGAGATGTTGGGTTAAGTCCCGCAA	293	116	169	116	0	323	0	154	107	140	0	170	332	265	323	0	0	81	0	82	0	0	1324	81	0	0	247	108	679	0	373	296	0	0	274	931	111	75	280	760	351	280	710	952	271	122
97b88d0d3498ea3d39208dc5310caa54	bASV374	d__Bacteria; p__Actinobacteriota; c__Actinobacteria; o__Frankiales; f__Acidothermaceae; g__Acidothermus; s__uncultured_bacterium	GTAGTCCACGCCGTAAACGTTGGGCGCTAGGTGTGGGTCCCTTCCACGGGGTCTGTGCCGCAGCTAACGCATTAAGCGCCCCGCCTGGGGAGTACGGCCGCAAGGCTAAAACTCAAAGGAATTGACGGGGGCCCGCACAAGCGGCGGAGCATGTTGCTTAATTCGACGCAACGCGAAGAACCTTACCAAGGTTTGACATGGCCGGAAAACTCGCAGAGATGCGGGGTCCTTCGGGGCCGGTCACAGGTGGTGCATGGCTGTCGTCAGCTCGTGTCGTGAGATGTTGGGTTAAGTCCCGCAACGAGC	0	0	0	135	538	103	97	116	61	38	0	0	26	50	0	0	0	0	78	176	137	230	120	292	140	0	0	0	0	0	98	0	0	0	0	142	56	0	0	0	0	0	0	29	0	0
2622d9965815372fa988c4b16c69c94c	bASV375	d__Bacteria; p__Proteobacteria; c__Gammaproteobacteria; o__Gammaproteobacteria_Incertae_Sedis; f__Unknown_Family; g__Acidibacter; s__metagenome	GTAGTCCACGCCATAAACGATGAGGACTAGACGTTGAGAGGGTAAGCCTCCCAGTGTCGCAGCTAACGCGATAAGTCCTCCGCCTGGGGAGTACGGCCGCAAGGTTGAAACTCAAAGGAATTGACGGGGACCCGCACAAGCGGTGGAGCATGTGGTTTAATTCGATGCAACGCGAAGAACCTTACCTGGCCTTGACATGTCGAGAATCCCGAAGAGATTTGGGAGTGCCGCAAGGAACTCGAACACAGGTGCTGCATGGCTGTCGTCAGCTCGTGTCGTGAGATGTTGGGTTAAGTCCCGCAACGA	229	80	176	299	506	151	53	345	126	287	214	127	193	45	184	0	0	377	73	312	244	282	264	20	238	0	121	65	401	341	147	255	153	126	130	375	459	405	66	197	133	374	574	619	242	144
cd6e3fd353203a9aa63180a802afd8a7	bASV376	d__Bacteria; p__Actinobacteriota; c__Actinobacteria; o__Micrococcales; f__Micrococcaceae	GTAGTCCATGCCGTAAACGTTGGGCACTAGGTGTGGGGGACATTCCACGTTTTCCGCGCCGTAGCTAACGCATTAAGTGCCCCGCCTGGGGAGTACGGCCGCAAGGCTAAAACTCAAAGGAATTGACGGGGGCCCGCACAAGCGGCGGAGCATGCGGATTAATTCGATGCAACGCGAAGAACCTTACCAAGGCTTGACATGAACCGGTAATACCTGGAAACAGGTGCCCCGCTTGCGGTCGGTTTACAGGTGGTGCATGGTTGTCGTCAGCTCGTGTCGTGAGATGTTGGGTTAAGTCCCGCAACG	0	0	97	59	0	0	0	187	0	105	0	0	0	134	0	0	0	53	0	40	0	148	0	184	37	0	0	0	71	0	0	0	0	0	0	0	285	85	0	0	0	0	0	0	0	51
7fec22ecf9055f48ad6059a1a659b52c	bASV377	d__Bacteria; p__Proteobacteria; c__Alphaproteobacteria; o__Rhizobiales; f__Xanthobacteraceae; g__uncultured	GTAGTCCACGCCGTAAACGATGGATGCTAGCCGTTGGTGGGTTTACCCATCAGTGGCGCAGCTAACGCATTAAGCATCCCGCCTGGGGAGTACGGTCGCAAGATTAAAACTCAAAGGAATTGACGGGGGCCCGCACAAGCGGTGGAGCATGTGGTTCAATTCGAAGCAACGCGAAGAACCTTACCAGCTTTTGACATCCCGGTCGCGAGCACCAGAGATGGAGCTCTTCAGTTCGGCTGGACCGGAGACAGGTGCTGCATGGCTGTCGTCAGCTCGTGTCGTGAGATGTTGGGTTAAGTCCCGCAA	0	0	0	513	0	270	109	791	328	78	0	0	268	0	0	0	0	2076	191	218	107	85	0	0	75	0	0	0	0	0	0	0	192	192	0	0	0	0	0	0	0	0	0	0	0	0
1ad0d2ba0c683242a59c71211744ec9e	bASV378	d__Bacteria; p__Actinobacteriota; c__Thermoleophilia; o__Gaiellales; f__uncultured; g__uncultured	GTAGTCCACGCCGTAAACGATGGGTGCTAGGTGTAGGGGGTGTCGACTCCCTCTGTGCCGAAGCTAACGCATTAAGCACCCCGCCTGGGGAGTACGGCCGCAAGGCTAAAACTCAAAGGAATTGACGGGGGCCCGCACAAGCAGCGGAGCATGTGGTTTAATTCGACGCGACGCGAAGAACCTTACCTGGGCTTGACATGCACGGGAATGTCGTAGAAATACGGCAGCCCTTCGGGGCTCGTGCACAGGTGTTGCATGGCTGTCGTCAGCTCGTGTCGTGAGATGTTGGGTTAAGTCCCGCAACGA	0	0	0	572	0	504	370	1081	178	0	98	0	340	0	0	0	0	227	376	247	209	602	904	154	196	383	0	0	0	0	52	0	0	0	0	452	240	93	0	0	0	153	68	104	0	0
7dad82073654c0f0b140ca86aa4f9e33	bASV379	d__Bacteria; p__Proteobacteria; c__Alphaproteobacteria; o__Rhizobiales; f__Rhizobiaceae; g__Mesorhizobium	GTAGTCCACGCCGTAAACGATGGAAGCTAGCCGTTGGCAAGTTTACTTGTCGGTGGCGCAGCTAACGCATTAAGCTTCCCGCCTGGGGAGTACGGTCGCAAGATTAAAACTCAAAGGAATTGACGGGGGCCCGCACAAGCGGTGGAGCATGTGGTTTAATTCGAAGCAACGCGCAGAACCTTACCAGCCCTTGACATCCCGGTCGCGGTTTCCAGAGATGGATTCCTTCAGTTCGGCTGGACCGGTGACAGGTGCTGCATGGCTGTCGTCAGCTCGTGTCGTGAGATGTTGGGTTAAGTCCCGCAA	146	0	276	468	0	430	122	1040	249	1193	0	0	104	358	0	0	0	3020	241	273	889	739	0	0	716	0	0	0	0	0	0	60	852	621	0	0	0	0	101	356	143	0	0	57	108	206
b56859b841d4cf6e2eb15814904619ae	bASV380	d__Bacteria; p__Firmicutes; c__Bacilli; o__Paenibacillales; f__Paenibacillaceae; g__Paenibacillus	GTAGTCCACGCCGTAAACGATGAGTGCTAGGTGTTAGGGGTTTCGATACCCTTGGTGCCGAAGTTAACACAGTAAGCACTCCGCCTGGGGAGTACGGTCGCAAGACTGAAACTCAAAGGAATTGACGGGGACCCGCACAAGCAGTGGAGTATGTGGTTTAATTCGAAGCAACGCGAAGAACCTTACCAGGTCTTGACATCCCTCTGAATCCTCTAGAGATAGAGGCGGCCTTCGGGACAGAGGAGACAGGTGGTGCATGGTTGTCGTCAGCTCGTGTCGTGAGATGTTGGGTTAAGTCCCGCAACG	369	68	292	0	552	622	0	253	268	158	199	128	177	91	537	0	618	286	0	109	125	212	45	119	199	0	47	0	158	0	96	172	175	102	407	0	0	0	0	0	0	0	0	0	156	81
4e650f1b6b80cc206177a662471f311a	bASV381	d__Bacteria; p__Firmicutes; c__Bacilli; o__Bacillales; f__Bacillaceae; g__Bacillus	GTAGTCCACGCCGTAAACGATGAGTGCTAAGTGTTAGAGGGTTTCCGCCCTTTAGTGCTGAAGTTAACGCATTAAGCACTCCGCCTGGGGAGTACGGCCGCAAGGCTGAAACTCAAAGGAATTGACGGGGGCCCGCACAAGCGGTGGAGCATGTGGTTTAATTCGAAGCAACGCGAAGAACCTTACCAGGTCTTGACATCCTCTGACAACCCTAGAGATAGGGCTTCTCCTTCGGGAGCAGAGTGACAGGTGGTGCATGGTTGTCGTCAGCTCGTGTCGTGAGATGTTGGGTTAAGTCCCGCAACG	799	0	5006	0	0	0	0	0	0	0	0	709	0	0	1360	0	0	0	0	114	0	0	90	874	0	0	0	0	142	0	0	0	0	0	0	0	148	64	0	0	0	0	0	0	954	0
bca08c08ebe46d7cc85e7f657bc70c1f	bASV382	d__Bacteria; p__Actinobacteriota; c__Thermoleophilia; o__Gaiellales; f__Gaiellaceae; g__Gaiella; s__uncultured_Acidimicrobiia	GTAGTCCACGCCGTAAACGATGGGCGCTAGGTGTGGGAGGTGTCGACTCCTTCCGTGCCGAAGCTAACGCATTAAGCGCCCCGCCTGGGGAGTACGGCCGCAAGGCTAAAACTCAAAGGAATTGACGGGGGCCCGCACAAGCAGCGGAGCATGTGGTTTAATTGGATGCGACGCCAAGAACCTTACCAAGGCTTGACATGGTCGGGAAAGCTGGAGAAATTCAGCCCTCCTTCGGGACTCGATCACAGGTGGTGCATGGCTGTCGTCAGCTCGTGTCGTGAGATGTTGGGTTAAGTCCCGCAACGA	831	115	302	135	0	153	0	290	78	476	206	219	122	270	283	0	0	377	0	105	248	243	48	0	251	0	42	59	345	322	130	124	161	165	277	268	0	0	369	1000	901	246	481	695	283	140
d9e377e98f41f337abc04563099cb923	bASV383	d__Bacteria; p__Proteobacteria; c__Alphaproteobacteria; o__Rhizobiales; f__Rhizobiales_Incertae_Sedis; g__Bauldia; s__metagenome	GTAGTCCACGCCGTAAACGATGAATGCTAGCCGTCGGTGAGCATGCTCTTCGGTGGCGCAGCCAACGCAATAAGCATTCCGCCTGGGGAGTACGATCGCAAGATTAAAACTCAAAGGAATTGACGGGGGCCCGCACAAGCGGTGGAGCATGTGGTTCAATTCGAAGCAACGCGCAGAACCTTACCAGGCCTTGACATCCCGGTCGCGGCCCCTTGAAAGAGGGGCTTTCAGTTCGGCTGGACCGGTGACAGGTGCTGCATGGCTGTCGTCAGCTCGTGTCGTGAGATGTTGGGTTAAGTCCCGCAA	239	78	330	152	0	180	50	211	114	448	224	158	53	436	334	18	0	932	75	156	504	326	11	0	463	285	23	46	254	317	102	193	196	227	293	234	0	0	244	530	285	38	69	97	641	184
a9da0efaa145343af71d7d7f2f0a0d2c	bASV384	d__Bacteria; p__Proteobacteria; c__Gammaproteobacteria; o__Burkholderiales; f__TRA3-20; g__TRA3-20	GTAGTCCACGCCCTAAACTATGTCAACTGGTTGTCGGGGAAGCAATTCCTTGGTAACGAAGCTAACGCGTGAAGTTGACCGCCTGGGGAGTACGGCCGCAAGGTTAAAACTCAAAGGAATTGACGGGGACCCGCACAAGCGGTGGATTATGTGGATTAATTCGATGCAACGCGAAAAACCTTACCTACCCTTGACATGCCAGGAACCTCGCAGAGATGTGAGGGTGCCCGAAAGGGAACCTGGACACAGGTGCTGCATGGCTGTCGTCAGCTCGTGTCGTGAGATGTTGGGTTAAGTCCCGCAACG	577	170	323	109	211	114	33	245	70	436	188	121	65	124	365	0	119	276	40	63	77	258	629	53	130	531	126	110	648	423	144	333	0	61	275	377	53	0	226	898	497	218	271	742	62	90
7f679e21a1ee52590b0a1324eff3ad79	bASV385	d__Bacteria; p__Proteobacteria; c__Alphaproteobacteria; o__Rhizobiales; f__Xanthobacteraceae; g__uncultured; s__uncultured_Hyphomicrobiaceae	GTAGTCCACGCCGTAAACGATGGAGGCTAGCCGTTGGCGAGCATGCTCGTCAGTGGCGCAGCTAACGCATTAAGCCTCCCGCCTGGGGAGTACGGTCGCAAGATTAAAACTCAAAGGAATTGACGGGGGCCCGCACAAGCGGTGGAGCATGTGGTTCAATTCGAAGCAACGCGCAGAACCTTACCAGCCCTTGACATCCCGGTCGCGGGAACCAGAGATGGATCCCTTCAGTTCGGCTGGACCGGTGACAGGTGCTGCATGGCTGTCGTCAGCTCGTGTCGTGAGATGTTGGGTTAAGTCCCGCAA	234	0	187	2155	0	438	144	3329	1409	604	254	128	901	297	291	0	1016	6870	155	640	1032	627	69	0	902	1622	81	77	407	233	88	154	913	1441	249	0	0	0	167	440	324	74	121	181	96	342
27866e5d36057a28fc24f63a3fb2afd3	bASV386	d__Bacteria; p__Proteobacteria; c__Alphaproteobacteria; o__Rhizobiales; f__Xanthobacteraceae; g__uncultured	GTAGTCCACGCCGTAAACGATGGATGCTAGCCGTTGGCAGGCTTGCCTGTCAGTGGCGCAGCTAACGCATTAAGCATCCCGCCTGGGGAGTACGGTCGCAAGATTAAAACTCAAAGGAATTGACGGGGGCCCGCACAAGCGGTGGAGCATGTGGTTCAATTCGAAGCAACGCGAAGAACCTTACCAACCTTTGACATCCCGGTCGCGGGCACCAGAGATGGAGCCCTTCAGTTCGGCTGGACCGGAGACAGGTGCTGCATGGCTGTCGTCAGCTCGTGTCGTGAGATGTTGGGTTAAGTCCCGCAA	486	159	600	159	392	263	70	235	96	339	208	267	112	146	131	0	0	671	68	131	312	190	58	0	310	0	0	0	91	0	110	163	235	292	314	0	0	0	100	388	265	58	173	89	261	117
0fdd99b76f9c0c2ac33c4b285e52f56e	bASV387	d__Bacteria; p__Proteobacteria; c__Gammaproteobacteria; o__Enterobacterales; f__Erwiniaceae; g__Pantoea	GTAGTCCACGCCGTAAACGATGTCGACTTGGAGGTTGTTCCCTTGAGGAGTGGCTTCCGGAGCTAACGCGTTAAGTCGACCGCCTGGGGAGTACGGCCGCAAGGTTAAAACTCAAATGAATTGACGGGGGCCCGCACAAGCGGTGGAGCATGTGGTTTAATTCGATGCAACGCGAAGAACCTTACCTACTCTTGACATCCAGCGAACTTAGCAGAGATGCTTTGGTGCCTTCGGGAACGCTGAGACAGGTGCTGCATGGCTGTCGTCAGCTCGTGTTGTGAAATGTTGGGTTAAGTCCCGCAACGA	61	0	0	0	0	0	0	0	0	0	0	107	44	0	0	0	0	0	0	93	0	0	41	0	134	0	0	0	0	0	0	0	0	0	0	0	0	0	0	0	0	0	0	0	0	0
1923cdea2aeaf7d241f0f3fbab0253b0	bASV388	d__Bacteria; p__Actinobacteriota; c__Thermoleophilia; o__Gaiellales; f__uncultured; g__uncultured	GTAGTCCACGCCGTAAACGATGGGTGCTAGGTGTGGGCGGTGTCGACTCCGTCCGTGCCGAAGCTAACGCATTAAGCACCCCGCCTGGGGAGTACGGCCGCAAGGCTAAAACTCAAAGGAATTGACGGGGGCCCGCACAAGCAGCGGAGCATGTGGTTCAATTCGACGCGACGCGAAGAACCTTACCGAGACTTGACATGCACTGGAATGTCGTAGAAATACGGCAGCCCTTCGGGGCTAGTGCACAGGTGGTGCATGGCTGTCGTCAGCTCGTGTCGTGAGATGTTGGGTTAAGTCCCGCAACGA	0	0	38	2095	0	477	374	3520	1205	1024	313	0	636	816	202	0	1735	1810	412	614	980	1167	96	63	780	804	0	34	331	0	29	0	303	503	0	519	0	0	0	0	0	192	156	297	228	220
800ed8dd260b2ef770176f1d0b93932d	bASV389	d__Bacteria; p__Actinobacteriota; c__Thermoleophilia; o__Gaiellales; f__Gaiellaceae; g__Gaiella	GTAGTCCACGCCGTAAACGATGGGTGCTAGGTGTGGGGGGTGTCGACTCCCTCCGTGCCGAAGCTAACGCATTAAGCACCCCGCCTGGGGAGTACGGCCGCAAGGCTAAAACTCAAAGGAATTGACGGGGGCCCGCACAAGCAGCGGAGCATGTGGTTTAATTCGACGCAACGCGAAGAACCTTACCAAGGCTTGACATGGTCGGGAAAGCCGTAGAAATACGGCCCTCCTTCGGGACTCGATCACAGGTGGTGCATGGCTGTCGTCAGCTCGTGTCGTGAGATGTTGGGTTAAGTCCCGCAACGA	695	0	256	372	0	223	0	495	179	402	306	136	68	121	660	0	0	368	0	71	126	142	0	0	181	0	0	0	0	0	0	66	229	266	207	0	0	0	501	979	1190	95	173	323	256	138
304c583c23c0b52096d130e3a00b6436	bASV390	d__Bacteria; p__Firmicutes; c__Bacilli; o__Paenibacillales; f__Paenibacillaceae; g__Paenibacillus	GTAGTCCACGCCGTAAACGATGAATGCTAGGTGTTAGGGGTTTCGATACCCTTGGTGCCGAAGTTAACACATTAAGCATTCCGCCTGGGGAGTACGGTCGCAAGACTGAAACTCAAAGGAATTGACGGGGACCCGCACAAGCAGTGGAGTATGTGGTTTAATTCGAAGCAACGCGAAGAACCTTACCAGGTCTTGACATCCCTCTGACCGTCCTAGAGATAGGGCTTTCCTTCGGGACAGAGGAGACAGGTGGTGCATGGTTGTCGTCAGCTCGTGTCGTGAGATGTTGGGTTAAGTCCCGCAACG	329	0	352	478	0	158	209	504	337	261	349	124	124	145	361	0	1080	335	286	246	818	227	83	93	1078	0	45	0	128	0	66	75	161	213	149	0	82	0	0	0	81	0	143	163	228	0
531f12692b59371cba54e1113c1ddf0f	bASV391	d__Bacteria; p__Acidobacteriota; c__Blastocatellia; o__Pyrinomonadales; f__Pyrinomonadaceae; g__RB41	GTAGTCCTAGCCTTAAACGATGAATGCTTGGTGTCTGGGGTTTTATAGTCCCCGGGTGCCGTCGCTAACGCTTTAAGCATTCCGCCTGGGGAGTACGGTCGCAAGACTGAAACTCAAAGGAATTGACGGGGACCCGCACAAGCGGTGGAGCATGTGGTTTAATTCGACGCAACGCGAAGAACCTTACCTGGGCTAGAATGCCTCTGACCGGCGTAGAGATACGCCTTCCTGGGTAAAACCAGGCAGAGTGCAAGGTGCTGCATGGCTGTCGTCAGCTCGTGTCGTGAGATGTTGGGTTAAGTCCCG	48	0	0	16	0	0	0	0	0	0	0	0	0	0	310	0	366	0	0	0	0	42	918	0	0	0	0	0	1101	0	115	343	0	27	775	2284	0	0	37	811	19	132	187	179	77	638
586e156c49edbdaf356124e4282dee2a	bASV392	d__Bacteria; p__Proteobacteria; c__Gammaproteobacteria; o__Burkholderiales; f__Sutterellaceae; g__uncultured; s__uncultured_bacterium	GTAGTCCACGCCCTAAACGATGTCGACTAGTTGTCGGAGGCTTGCGCCTTCGGTAACGCAGCTAACGCGTGAAGTCGACCGCCTGGGGAGTACGGTCGCAAGATTAAAACTCAAAGGAATTGACGGGGACCCGCACAAGCGGTGGATGATGTGGATTAATTCGATGCAACGCGAAAAACCTTACCTACCCTTGACATGCCAGGAACTTGCCAGAGATGGCTTGGTGCTCGAAAGAGAACCTGGACACAGGTGCTGCATGGCTGTCGTCAGCTCGTGTCGTGAGATGTTGGGTTAAGTCCCGCAACG	573	252	309	68	146	310	0	84	34	70	84	181	227	192	442	0	0	180	0	0	14	42	1216	79	27	0	173	104	664	440	180	326	46	35	302	414	26	0	242	712	418	133	399	853	274	172
2bf7011f65d0a26173c52467cc202c34	bASV393	d__Bacteria; p__Verrucomicrobiota; c__Verrucomicrobiae; o__Pedosphaerales; f__Pedosphaeraceae; g__ADurb.Bin063-1; s__uncultured_bacterium	GTAGTCCTAGCCGTAAACGGTGCACGTTTGCTGTAAAAGGAATCGACCCCTTTTGTGGCGTAGCTAACGCGTTAAACGTGCCGCCTGGGAAGTACGGTCGCAAGATTAAAACTCAAAGAAATTGACGGGGGCCTGCACAAGCGGTGGAGTATGTGGCTCAATTCGATGCAACGCGAAGAACCTTACCTGGCCTTGACATGCACGTAGTAGAAGGGTGAAAGCCTAACGAGGTAGCAATACCAGCGTGCACAGGTGCTGCATGGCTGTCGTCAGCTCGTGTCGTGAGATGTTGGGTTAAGTCCCGCA	535	157	216	109	306	107	0	103	45	134	122	135	0	169	246	0	0	334	0	0	73	46	203	0	0	0	0	0	320	0	125	323	95	106	327	534	0	0	138	308	173	86	191	210	450	73
b86ac5570c42d0ff2475726e8622bf51	bASV394	d__Bacteria; p__Actinobacteriota; c__Actinobacteria; o__Corynebacteriales; f__Mycobacteriaceae; g__Mycobacterium	GTAGTCCACGCCGTAAACGGTGGGTACTAGGTGTGGGTTTCCTTCCTTGGGATCCGTGCCGTAGCTAACGCATTAAGTACCCCGCCTGGGGAGTACGGCCGCAAGGCTAAAACTCAAAGAAATTGACGGGGGCCCGCACAAGCGGCGGAGCATGTGGATTAATTCGATGCAACGCGAAGAACCTTACCTGGGTTTGACATGCACAGGACGTGCCTAGAGATAGGTATTCCCTTGTGGCCTGTGTGCAGGTGGTGCATGGCTGTCGTCAGCTCGTGTCGTGAGATGTTGGGTTAAGTCCCGCAACGA	0	0	89	735	0	246	253	1216	408	387	537	0	280	163	618	0	2143	1575	354	348	948	602	0	0	524	0	0	0	92	0	0	0	190	307	0	0	0	0	0	0	0	0	0	0	97	58
c45c65d88d6f8f2b5ef5014d98fcbe59	bASV395	d__Bacteria; p__Proteobacteria; c__Gammaproteobacteria; o__Burkholderiales; f__Burkholderiaceae; g__Burkholderia-Caballeronia-Paraburkholderia	GTAGTCCACGCCCTAAACGATGTCAACTAGTTGTTGGGGATTCATTTCCTTAGTAACGTAGCTAACGCGTGAAGTTGACCGCCTGGGGAGTACGGTCGCAAGATTAAAACTCAAAGGAATTGACGGGGACCCGCACAAGCGGTGGATGATGTGGATTAATTCGATGCAACGCGAAAAACCTTACCTACCCTTGACATGGTCGGAAGTCTGCTGAGAGGTGGACGTGCTCGAAAGAGAACCGGCGCACAGGTGCTGCATGGCTGTCGTCAGCTCGTGTCGTGAGATGTTGGGTTAAGTCCCGCAACG	0	0	0	0	0	86	0	34	0	82	0	0	106	103	0	0	0	0	0	0	47	79	817	301	65	0	0	0	110	0	176	55	0	0	0	209	1151	86	0	0	0	84	80	40	0	0
4e92dc36794b97e133515ee99517a330	bASV397	d__Bacteria; p__Actinobacteriota; c__Actinobacteria; o__Micrococcales; f__Cellulomonadaceae; g__Cellulomonas	GTAGTCCATGCCGTAAACGTTGGGCACTAGGTGTGGGGCTCATTCCACGAGTTCCGTGCCGCAGCAAACGCATTAAGTGCCCCGCCTGGGGAGTACGGCCGCAAGGCTAAAACTCAAAGAAATTGACGGGGGCCCGCACAAGCGGCGGAGCATGCGGATTAATTCGATGCAACGCGAAGAACCTTACCAAGGCTTGACATACACCGGAAACTTCCAGAGATGGTTGCCCCGCAAGGTCGGTGTACAGGTGGTGCATGGTTGTCGTCAGCTCGTGTCGTGAGATGTTGGGTTAAGTCCCGCAACGAG	283	84	141	96	387	150	42	131	77	234	99	62	51	93	262	0	288	194	104	122	151	540	67	26	187	250	34	63	212	0	0	35	72	56	63	0	0	0	34	77	83	52	96	135	67	48
b13b54cee67a893f7360acb4e7fb63b8	bASV398	d__Bacteria; p__Firmicutes; c__Bacilli; o__Lactobacillales; f__Enterococcaceae; g__Enterococcus	GTAGTCCACGCCGTAAACGATGAGTGCTAAGTGTTGGAGGGTTTCCGCCCTTCAGTGCTGCAGCAAACGCATTAAGCACTCCGCCTGGGGAGTACGACCGCAAGGTTGAAACTCAAAGGAATTGACGGGGGCCCGCACAAGCGGTGGAGCATGTGGTTTAATTCGAAGCAACGCGAAGAACCTTACCAGGTCTTGACATCCTTTGACCACTCTAGAGATAGAGCTTCCCCTTCGGGGGCAAAGTGACAGGTGGTGCATGGTTGTCGTCAGCTCGTGTCGTGAGATGTTGGGTTAAGTCCCGCAACG	222	13	0	0	343	0	0	0	65	19	0	43	0	0	0	0	0	0	0	0	51	0	53	18	52	0	0	0	62	0	0	0	0	0	400	0	0	0	0	0	0	0	0	0	0	0
2bfcf53839738fcc8ac9f885f5f25849	bASV399	d__Bacteria; p__Actinobacteriota; c__Thermoleophilia; o__Gaiellales; f__uncultured; g__uncultured	GTAGTCCACGCCGTAAACGATGGGTGCTAGGTGTGGGCGGTGTCGACTCCGTCCGTGCCGAAGCTAACGCATTAAGCACCCCGCCTGGGGAGTACGGCCGCAAGGCTAAAACTCAAAGGAATTGACGGGGGCCCGCACAAGCAGCGGAGCATGTGGTTTAATTCGACGCGACGCGAAGAACCTTACCAAGGCTTGACATGTACCGGAATGTCGTAGAAATACGGCAGCCCTTCGGGGCCGGTACACAGGTGGTGCATGGCTGTCGTCAGCTCGTGTCGTGAGATGTTGGGTTAAGTCCCGCAACGA	0	0	51	755	0	954	171	1281	498	326	159	0	972	305	172	0	0	1888	170	189	471	663	893	45	383	656	339	156	972	591	130	216	437	407	302	0	0	0	0	71	91	239	262	467	143	301
d5081339f0efbf85bc72be50a4cddae5	bASV400	d__Bacteria; p__Proteobacteria; c__Gammaproteobacteria; o__Burkholderiales; f__Comamonadaceae	GTAGTCCACGCCCTAAACGATGTCAACTGGTTGTTGGACGGCTTGCTGTTCAGTAACGAAGCTAACGCGTGAAGTTGACCGCCTGGGGAGTACGGCCGCAAGGTTGAAACTCAAAGGAATTGACGGGGACCCGCACAAGCGGTGGATGATGTGGTTTAATTCGATGCAACGCGAAAAACCTTACCTACCCTTGACATGCCAGGAATCCCGCAGAGATGTGGGAGTGCTCGAAAGAGAACCTGGACACAGGTGCTGCATGGCCGTCGTCAGCTCGTGTCGTGAGATGTTGGGTTAAGTCCCGCAACG	365	371	261	154	882	210	0	116	103	123	138	222	239	148	574	0	0	138	0	67	63	136	591	101	87	0	219	202	527	806	193	278	0	119	303	1028	195	0	168	297	256	232	225	321	204	110
15beaf5a1fa291ea828562444b305fed	bASV401	d__Bacteria; p__Proteobacteria; c__Alphaproteobacteria; o__uncultured; f__uncultured; g__uncultured; s__uncultured_soil	GTAGTCCACGCCGTAAACGATGAGTGCTAGACGCTGGGGGGTTAACCCTTCGGTGTCGCAGCTAACGCATTAAGCACTCCGCCTGGGGAGTACGGCCGCAAGGTTGAAACTCAAAGGAATTGACGGGGGCCCGCACAAGCGGTGGAGCATGTGGTTTAATTCGAAGCAACGCGAAGAACCTTACCAGCCCTTGACATGGGGAGTATGGGTCGCAGAGACGTGACCCTTCAGTTCGGCTGGCTCCCACACAGGTGCTGCATGGCTGTCGTCAGCTCGTGTCGTGAGATGTTGGGTTAAGTCCCGCAA	38	11	49	1492	0	368	64	1884	1006	912	877	17	684	636	269	0	435	1604	75	374	1827	971	0	0	1609	1092	0	0	13	0	0	0	560	527	0	0	0	0	0	15	0	0	0	14	901	1315
4ae6e9ad7400a23faa11f077d661d497	bASV402	d__Bacteria; p__Actinobacteriota; c__Thermoleophilia; o__Gaiellales	GTAGTCCACGCCGTAAACGATGGGTGCTAGGTGTGGGGGGTGTCGACTCCCTCCGTGCCGAAGCTAACGCATTAAGCACCCCGCCTGGGGAGTACGGCCGCAAGGCTAAAACTCAAAGGAATTGACGGGGGCCCGCACAAGCAGCGGAGCATGTGGTTTAATTCGACGCAACGCGAAGAACCTTACCAAGGCTTGACATGTAATTGAAAAACCTGGAAACAGGTTCCCTCTTCGGAGCAATTACACAGGTGGTGCATGGCTGTCGTCAGCTCGTGTCGTGAGATGTTGGGTTAAGTCCCGCAACGA	241	25	51	89	1394	346	58	190	51	167	103	32	1351	262	395	0	378	634	0	29	72	253	1134	100	115	276	261	197	851	0	117	63	143	279	75	606	99	19	51	130	74	362	230	453	38	318
8bb591c80df58ab88c31ca41fa99040c	bASV403	d__Bacteria; p__Proteobacteria; c__Alphaproteobacteria; o__Rhizobiales; f__A0839; g__A0839; s__uncultured_sludge	GTAGTCCACGCTGTAAACGATGAGTGCTAGGCGTCGGCACGCTTGCGTGTCGGTGCCGCAGCTAACGCGTGAAGCACTCCGCCTGGGGAGTACGGTCGCAAGATTAAAACTCAAAGGAATTGACGGGGGCCCGCACAAGCGGTGGAGCATGTGGTTTAATTCGACGCAACGCGCAGAACCTTACCAGCCCTTGACATGCCGTGCTACTTGCAGAGATGCAGGGTTCCAGCAATGGACGCGGACACAGGTGCTGCATGGCTGTCGTCAGCTCGTGTCGTGAGATGTTGGGTTAAGTCCCGCAACGAG	55	0	0	254	669	659	36	295	142	368	439	26	354	723	74	0	0	1404	0	278	588	375	0	0	650	186	0	0	0	0	31	260	343	285	0	0	0	0	0	0	0	0	0	0	496	642
8134f79c06ee529bb41e543ec0dece18	bASV404	d__Bacteria; p__Proteobacteria; c__Alphaproteobacteria; o__Rhizobiales; f__Beijerinckiaceae; g__Methylobacterium-Methylorubrum; s__Methylobacterium_hispanicum	GTAGTCCACGCCGTAAACGATGAATGCTAGCTGTTGGGGTGCATGCACCGCAGTAGCGCAGCTAACGCATTAAGCATTCCGCCTGGGGAGTACGGTCGCAAGATTAAAACTCAAAGGAATTGACGGGGGCCCGCACAAGCGGTGGAGCATGTGGTTTAATTCGAAGCAACGCGCAGAACCTTACCATCCTTTGACATGGCATGTTACCTGGAGAGATCCAGGGTCCTCTTCGGAGGCGTGCACACAGGTGCTGCATGGCTGTCGTCAGCTCGTGTCGTGAGATGTTGGGTTAAGTCCCGCAACGAG	180	0	66	61	0	48	63	509	76	50	75	95	62	62	41	0	0	36	28	68	61	146	130	52	98	121	46	0	99	0	957	29	247	48	0	447	0	39	0	38	138	0	102	0	0	0
e974556177d776f3e579cf37a6b24b85	bASV405	d__Bacteria; p__Actinobacteriota; c__Actinobacteria; o__Catenulisporales; f__Actinospicaceae; g__Actinospica	GTAGTCCACGCCGTAAACGTTGGGCGCTAGGTGTGGGGACTGTTTCCACGGTCTCCGTGCCGGAGCTAACGCATTAAGCGCCCCGCCTGGGGAGTACGGCCGCAAGGCTAAAACTCAAAGGAATTGACGGGGGCCCGCACAAGCGGCGGAGCATGCGGCTTAATTCGATGCAACGCGAAGAACCTTACCAGGGCTTGACATGCACGGTGCAGCCGTAGAGATACGGTGTCCTTTGGGGTCGTGCACAGGTGGTGCATGGTTGTCGTCAGCTCGTGTCGTGAGATGTTGGGTTAAGTCCCGCAACGA	16	0	20	151	427	38	92	230	76	888	51	0	42	0	55	0	655	84	77	824	781	329	20	301	743	0	0	0	74	0	32	0	0	0	65	0	200	85	0	0	0	0	42	0	27	0
84a5eac016bd4ca1af48fe1246e06707	bASV406	d__Bacteria; p__Proteobacteria; c__Alphaproteobacteria; o__Caulobacterales; f__Caulobacteraceae; g__Phenylobacterium	GTAGTCCACGCTGTAAACGATGAGTGCTAGTTGTCGGCATGCATGCATGTCGGTGACGCAGCTAACGCATTAAGCACTCCGCCTGGGGAGTACGGTCGCAAGATTAAAACTCAAAGGAATTGACGGGGGCCCGCACAAGCGGTGGAGCATGTGGTTTAATTCGAAGCAACGCGCAGAACCTTACCACCTTTTGACATGCCCTGACCGCCGGAGAGATCCGGTTTTCCCTTCGGGGACAGGGACACAGGTGCTGCATGGCTGTCGTCAGCTCGTGTCGTGAGATGTTGGGTTAAGTCCCGCAACGAG	94	0	0	104	0	0	0	195	92	123	167	0	115	188	160	0	0	113	0	0	83	91	438	123	99	514	131	133	170	684	183	154	0	0	266	767	426	149	192	379	222	196	228	346	54	1974
e0f257323e6e32ba432d1df5b73bed65	bASV407	d__Bacteria; p__Proteobacteria; c__Alphaproteobacteria; o__Rhizobiales; f__Xanthobacteraceae; g__uncultured	GTAGTCCACGCCGTAAACGATGGATGCTAGCCGTTGGCGGGTTTACTCGTCAGTGGCGCAGCTAACGCATTAAGCATCCCGCCTGGGGAGTACGGTCGCAAGATTAAAACTCAAAGGAATTGACGGGGGCCCGCACAAGCGGTGGAGCATGTGGTTCAATTCGAAGCAACGCGCAGAACCTTACCAGCCCTTGACATCCCGGTCGCGGGAACGAGAGATCGATCCCTTCAGTTCGGCTGGACCGGAGACAGGTGCTGCATGGCTGTCGTCAGCTCGTGTCGTGAGATGTTGGGTTAAGTCCCGCAA	181	85	164	388	0	311	73	357	196	250	326	138	103	226	234	0	0	1064	0	189	409	221	82	0	387	643	138	112	426	636	200	407	377	360	181	781	53	0	156	293	390	111	237	347	354	311
9e0abe34f1af0b7d8d0b76b1c35bfed6	bASV408	d__Bacteria; p__Proteobacteria; c__Alphaproteobacteria; o__Sphingomonadales; f__Sphingomonadaceae; g__Novosphingobium	GTAGTCCACGCCGTAAACGATGATAACTAGCTGTCCGGGTACTTGGTACTTGGGTGGCGCAGCTAACGCATTAAGTTATCCGCCTGGGGAGTACGGTCGCAAGATTAAAACTCAAAGGAATTGACGGGGGCCTGCACAAGCGGTGGAGCATGTGGTTTAATTCGAAGCAACGCGCAGAACCTTACCAGCGTTTGACATCCTCATCGCGGATTAGAGAGATCTTTTCCTTCAGTTCGGCTGGATGAGTGACAGGTGCTGCATGGCTGTCGTCAGCTCGTGTCGTGAGATGTTGGGTTAAGTCCCGCA	183	240	311	121	0	0	0	163	55	55	0	635	0	0	385	0	0	38	0	0	0	51	74	67	0	0	150	64	59	0	0	0	0	0	0	0	16	0	0	0	0	0	89	0	95	0
d0981381010d4ef90c54c7fac5ce8c93	bASV409	d__Bacteria; p__Proteobacteria; c__Gammaproteobacteria; o__Gammaproteobacteria_Incertae_Sedis; f__Unknown_Family; g__Acidibacter	GTAGTCCACGCCATAAACGATGAGAACTAGACGTTGAGAGGGTAAGCCTCGCAGTGTCGTAGCTAACGCGCTAAGTTCTCCGCCTGGGGAGTACGGCCGCAAGGTTGAAACTCAAAGGAATTGACGGGGACCCGCACAAGCGGTGGAGCATGTGGTTTAATTCGATGCAACGCGAAGAACCTTACCTGGCCTTGACATCCCAGGAACCCTGAAGAGATTCGGGGGTGCCGCAAGGAACCTGGAGACAGGTGCTGCATGGCTGTCGTCAGCTCGTGTCGTGAGATGTTGGGTTAAGTCCCGCAACGA	0	0	0	0	803	454	0	0	0	0	0	0	1148	0	0	0	0	47	0	0	0	0	253	215	56	0	0	0	0	0	0	0	0	0	0	0	119	76	0	0	0	0	0	0	0	0
384a8fc645a337e3aca62c3eace3d599	bASV410	d__Bacteria; p__Actinobacteriota; c__Actinobacteria; o__Pseudonocardiales; f__Pseudonocardiaceae; g__Pseudonocardia	GTAGTCCACGCCGTAAACGTTGGGCGCTAGGTGTGGGGACCATTCCACGGTTTCTGTGCCGCAGCTAACGCATTAAGCGCCCCGCCTGGGGAGTACGGCCGCAAGGCTAAAACTCAAAGGAATTGACGGGGGCCCGCACAAGCGGCGGAGCATGTGGATTAATTCGATGCAACGCGAAGAACCTTACCTGGGTTTGACATGCACCAGACGCTGCCGGAGACGGTAGTTCCCTTGTGGTTGGTGTGCAGGTGGTGCATGGCTGTCGTCAGCTCGTGTCGTGAGATGTTGGGTTAAGTCCCGCAACGA	38	0	30	81	1121	142	98	140	0	159	138	0	122	234	120	0	731	297	64	55	159	360	551	100	125	467	93	115	446	288	181	253	67	110	198	1064	52	0	60	149	367	323	244	264	45	47
78945cdc071cb5a93756fd63dc3175e5	bASV412	d__Bacteria; p__Proteobacteria; c__Gammaproteobacteria; o__Xanthomonadales; f__Xanthomonadaceae; g__Lysobacter	GTAGTCCACGCCCTAAACGATGCGAACTGGATGTTGGGGGCAACTTGGCCCTCAGTATCGAAGCTAACGCGTTAAGTTCGCCGCCTGGGAAGTACGGTCGCAAGACTGAAACTCAAAGGAATTGACGGGGGCCCGCACAAGCGGTGGAGTATGTGGTTTAATTCGATGCAACGCGAAGAACCTTACCTGGCCTTGACATGCACGGAACTTTCCAGAGATGGATTGGTGCCTTCGGGAACCGTGACACAGGTGCTGCATGGCTGTCGTCAGCTCGTGTCGTGAGATGTTGGGTTAAGTCCCGCAACG	29	48	40	33	137	65	102	140	46	1079	132	0	88	81	128	0	0	256	111	208	253	334	0	0	250	213	0	0	0	0	0	14	137	66	39	0	111	0	19	0	0	0	32	20	110	0
3d8ecb5d475d8723e6deeedd8182e3dd	bASV413	d__Bacteria; p__Acidobacteriota; c__Subgroup_22; o__Subgroup_22; f__Subgroup_22; g__Subgroup_22	GTAGTCCTAGCTGTAAACGATGGGCACTTGGTGTTGCGGGTATCGACCCCTGCAGTGCCGAAGCTAACGCATTAAGTGCCCCGCCTGGGGAGTACGGTCGCAAGGCTGAAACTCAAAGGAATTGACGGGGGCCCGCACAAGCGGTGGAGCATGTGGTTTAATTCGACGCAACGCGAAGAACCTTACCTGGGTTTGAACTGCGGTGGACCGCTCCAGAGATGGAGCTTCCCTTCGGGGCTGCCGTGGAGGTGCTGCATGGCTGTCGTCAGCTCGTGTCGTGAGATGTTGGGTTAAGTCCCGCAACGA	179	0	0	479	0	603	83	524	415	366	431	182	359	572	242	0	0	474	0	340	728	275	229	33	820	670	334	327	766	588	304	472	264	457	297	448	0	0	134	380	199	89	150	343	132	383
bd1ff7eb073bf897d7efb5c9bcbdff20	bASV414	d__Bacteria; p__Actinobacteriota; c__Thermoleophilia; o__Solirubrobacterales; f__67-14; g__67-14; s__uncultured_bacterium	GTAGTCCACGCCGTAAACGATGGGCACTAGGTGTGGGAGGTGTCGACTCCTCCCGTGCCGGAGCTAACGCATTAAGTGCCCCGCCTGGGGAGTACGGCCGCAAGGCTAAAACTCAAAGGAATTGACGGGGACCCGCACAAGCAGCGGAGCATGTGGTTTAATTCGACGCAACGCGAAGAACCTTACCTGGGTTTGACATGTTCCTGACCGCCGTGGAAACACGGCTTCCCCTTGTGGGCAGGATCACAGGTGGTGCATGGCTGTCGTCAGCTCGTGTCGTGAGATGTTGGGTTAAGTCCCGCAACG	96	0	169	1248	0	734	207	2060	722	922	1017	66	300	281	380	0	311	3177	266	278	810	419	69	0	733	809	104	83	225	164	0	99	672	972	116	0	0	0	258	526	719	266	318	431	169	475
579abff67dfbeb12736ecf2f1a855f8c	bASV415	d__Bacteria; p__Acidobacteriota; c__Acidobacteriae; o__Acidobacteriales; f__Acidobacteriaceae_(Subgroup_1); g__Occallatibacter	GTAGTCCTAGCCCTAAACGATGACTGCTTGGTGTGACGGGTACCCAATCCCGCCGTGCCGTAGCTAACGCGTTAAGCAGTCCGCCTGGGGAGTACGGTCGCAAGGCTGAAACTCAAAGGAATTGACGGGGGCCCGCACAAGCGGTGGAGCATGTGGTTTAATTCGACGCAACGCGAAGAACCTTACCTGGGCTCGAAATGCTATGGACCGGAGTAGAAATATTCCTTCCCCGCAAGGGGCCGTAGTATAGGTGCTGCATGGCTGTCGTCAGCTCGTGTCGTGAGATGTTGGGTTAAGTCCCGCAAC	0	0	0	160	1137	207	0	77	0	0	0	0	147	85	0	0	0	12	0	207	0	0	527	516	0	0	0	0	0	0	0	0	0	0	0	0	415	169	0	0	0	0	0	0	0	0
3360778ccd04fa5fefe392d53afc4a16	bASV416	d__Bacteria; p__Firmicutes; c__Bacilli; o__Bacillales; f__Bacillaceae; g__Bacillus	GTAGTCCACGCCGTAAACGATGAGTGCTAAGTGTTAGAGGGTTTCCGCCCTTTAGTGCTGCAGCAAACGCATTAAGCACTCCGCCTGGGGAGTACGGCCGCAAGGCTGAAACTCAAAGGAATTGACGGGGGCCCGCACAAGCGGTGGAGCATGTGGTTTAATTCGAAGCAACGCGAAGAACCTTACCAGGTCTTGACATCCTCTGACAACCCTAGAGATAGGGCGTTCCCCTTCGGGGGACAGAGTGACAGGTGGTGCATGGTTGTCGTCAGCTCGTGTCGTGAGATGTTGGGTTAAGTCCCGCAA	947	228	788	374	0	0	0	431	267	112	0	405	99	0	175	0	0	0	0	0	0	0	0	0	0	0	0	0	59	0	0	0	0	0	0	0	0	0	110	244	180	105	213	172	3810	0
0e5b8af13895cea77f6362d3afccabae	bASV417	d__Bacteria; p__Chloroflexi; c__TK10; o__TK10; f__TK10; g__TK10; s__uncultured_bacterium	GTAGTCCACGCCGTAAACGATGGGTGCTAGGTGTCGGGGGTATCGACCCCCCCGGTGCCGCAGCTAACGCGATAAGCACCCCGCCTGGGGACTACGGCCGCAAGGCTAAAACTCAAAGGAATTGACGGGGGCCCGCACAAGCAGCGGAGCGTGTGGTTTAATTCGATGCAACGCGAAGAACCTTACCCGGGCTTGACGTGCTGGTAGTAGCGAGGGGAAACCCGAGCGACCCGCAAGGGAGCCAGCGCAGGTGCTGCACGGCTGTCGTCAGCTCGTGCCGTGAGGTGTTGGGTTAAGTCCCGCAAC	918	33	117	147	0	397	6	158	147	33	45	95	182	40	0	0	0	1351	39	0	199	0	0	0	125	0	0	0	280	3557	540	1801	142	443	453	0	0	0	86	204	120	394	1116	1950	41	239
d1468d2e99431c22bf988b380df7c27f	bASV419	d__Bacteria; p__Proteobacteria; c__Gammaproteobacteria; o__Pseudomonadales; f__Pseudomonadaceae; g__Pseudomonas	GTAGTCCACGCCGTAAACGATGTCAACTAGCCGTTGGGGACCTTGAGTCTTTAGTGGCGCAGCTAACGCATTAAGTTGACCGCCTGGGGAGTACGGCCGCAAGGTTAAAACTCAAATGAATTGACGGGGGCCCGCACAAGCGGTGGAGCATGTGGTTTAATTCGAAGCAACGCGAAGAACCTTACCAGGCCTTGACATCCAATGAACTTTCCAGAGATGGATTGGTGCCTTCGGGAGCATTGAGACAGGTGCTGCATGGCTGTCGTCAGCTCGTGTCGTGAGATGTTGGGTTAAGTCCCGTAACGA	0	0	0	0	0	0	0	0	0	350	0	0	68	0	383	0	0	84	0	0	113	98	0	0	154	0	0	0	0	0	0	0	0	0	147	0	0	0	0	0	0	0	0	0	0	49
a77febb9808985ba181a5db3e31c52b6	bASV420	d__Bacteria; p__Nitrospirota; c__Nitrospiria; o__Nitrospirales; f__Nitrospiraceae; g__Nitrospira	GTAGTCCACGCCTTAAACTATGAATACTAAGTGTCGGCGGGTTACCGCCGGTGCCGCAGCTAACGCATTAAGTATTCCGCCTGGGAAGTACGGCCGCAAGGTTGAAACTCAAAGGAATTGACGGGGGCCCGCACAAGCGGTGGAGCATGTGGTTTAATTCGACGCAACGCGAAGAACCTTACCCAGGCTGGACATGCAGGTAGTAGAAGGGTGAAAGCCCAACGAGGTAGCAATACCATCCTGCTCAGGTGCTGCATGGCTGTCGTCAGCTCGTGCCGTGAGGTGTTGGGTTAAGTCCCGCAACGA	591	104	0	1257	0	927	280	1155	1183	133	709	106	660	182	214	0	648	2248	325	453	1345	313	32	0	1689	0	0	0	0	0	86	114	513	773	0	0	0	0	0	0	0	0	0	39	100	356
0fb763f100bf86103e474adaafbfd1ed	bASV421	d__Bacteria; p__Proteobacteria; c__Alphaproteobacteria; o__Rhizobiales; f__Rhizobiaceae; g__Allorhizobium-Neorhizobium-Pararhizobium-Rhizobium	GTAGTCCACGCCGTAAACGATGAATGTTAGCCGTCGGCAAGTTTACTTGTCGGTGGCGCAGCTAACGCATTAAACATTCCGCCTGGGGAGTACGGTCGCAAGATTAAAACTCAAAGGAATTGACGGGGGCCCGCACAAGCGGTGGAGCATGTGGTTTAATTCGAAGCAACGCGCAGAACCTTACCAGCCCTTGACATGTCCGGCTCACCACAGAGATGTGGTTTTCCCTTCGGGGACCGGAACACAGGTGCTGCATGGCTGTCGTCAGCTCGTGTCGTGAGATGTTGGGTTAAGTCCCGCAACGAG	254	72	129	88	0	63	0	298	88	0	0	506	0	646	660	0	0	24	0	115	55	99	173	83	101	0	160	402	1284	401	47	34	0	0	27	0	60	0	0	0	0	81	40	28	0	41
a0aa48f5bb12c51bda299be1ef66a1b5	bASV422	d__Bacteria; p__Proteobacteria; c__Alphaproteobacteria; o__Rhizobiales; f__Xanthobacteraceae; g__Rhodoplanes	GTAGTCCACGCCGTAAACGATGAATGCTAGCCGTTGGCGGGTTTACTCGTCAGTGGCGCAGCTAACGCTTTAAGCATTCCGCCTGGGGAGTACGGTCGCAAGATTAAAACTCAAAGGAATTGACGGGGGCCCGCACAAGCGGTGGAGCATGTGGTTTAATTCGACGCAACGCGCAGAACCTTACCAGCCCTTGACATGTCCCGTATGGGTTTCAGAGATGAGATCCTTCAGTTCGGCTGGCGGGAACACAGGTGCTGCATGGCTGTCGTCAGCTCGTGTCGTGAGATGTTGGGTTAAGTCCCGCAA	0	0	0	645	658	410	143	416	325	0	0	0	1729	71	0	0	0	241	248	56	142	97	599	204	90	402	38	33	63	0	118	0	49	0	0	208	404	215	0	0	0	0	0	0	0	0
832a7d06280e96bda9d2c254c000fa5d	bASV424	d__Bacteria; p__Actinobacteriota; c__Thermoleophilia; o__Gaiellales; f__Gaiellaceae; g__Gaiella; s__uncultured_Rubrobacteria	GTAGTCCACGCCGTAAACGATGGGTGCTAGGTGTGGGCGGTGTCGACTCCGTCCGTGCCGAAGCTAACGCATTAAGCACCCCGCCTGGGGAGTACGGCCGCAAGGCTAAAACTCAAAGGAATTGACGGGGGCCCGCACAAGCAGCGGAGCATGTTGTTTAATTCGACGCGACGCGAAGAACCTTACCAGGGCTTGACATGCACGGGAATGTCGTAGAAATACGGCAGCCCTTCGGGGCTCGTGCACAGGTGGTGCATGGCTGTCGTCAGCTCGTGTCGTGAGATGTTGGGTTAAGTCCCGCAACGA	0	0	0	1483	0	648	213	2632	1002	658	0	0	925	228	0	0	1860	549	210	378	256	610	94	0	223	0	0	0	0	0	0	0	0	0	0	0	0	65	0	0	0	120	220	263	245	248
bcf7a3742298e97da75cc5bcfbd439bb	bASV425	d__Bacteria; p__Actinobacteriota; c__Actinobacteria; o__Streptomycetales; f__Streptomycetaceae; g__Streptomyces	GTAGTCCACGCCGTAAACGTTGGGAACTAGGTGTTGGCGACATTCCACGTCGTCGGTGCCGCAGCTAACGCATTAAGTTCCCCGCCTGGGGAGTACGGCCGCAAGGCTAAAACTCAAAGGAATTGACGGGGGCCCGCACAAGCAGCGGAGCATGTGGCTTAATTCGACGCAACGCGAAGAACCTTACCAAGGCTTGACATATACCGGAAAGCATCAGAGATGGTGCCCCCCTTGTGGTCGGTATACAGGTGGTGCATGGCTGTCGTCAGCTCGTGTCGTGAGATGTTGGGTTAAGTCCCGCAACGA	167	0	0	465	0	192	267	663	315	901	213	109	358	137	200	0	1483	691	137	332	582	717	34	0	509	0	0	0	161	0	0	0	204	399	0	0	0	0	0	0	0	108	261	258	367	135
d9e10ad1bffaa1857d7ef731e22b20fd	bASV426	d__Bacteria; p__Nitrospirota; c__Nitrospiria; o__Nitrospirales; f__Nitrospiraceae; g__Nitrospira; s__uncultured_organism	GTAGTCCACGCCTTAAACGATGGATACTAAGTGTCGGCGGGTTACCGCCGGTGCCGCAGCTAACGCAGTAAGTATCCCGCCTGGGAAGTACGGCCGCAAGGTTGAAACTCAAAGGAATTGACGGGGGCCCGCACAAGCGGTGGAGCATGTGGTTTAATTCGACGCAACGCGAAGAACCTTACCCAGGCTGGACATGCAGGTAGTAGAAGGGTGAAAGCCTAACGAGGTAGCAATACCAGCCTGCTCAGGTGCTGCATGGCTGTCGTCAGCTCGTGCCGTGAGGTGTTGGGTTAAGTCCCGCAACGA	1079	0	599	0	0	268	0	158	0	393	0	164	298	424	373	0	578	546	0	118	170	930	108	0	244	0	0	0	137	0	0	0	0	0	0	0	0	0	0	0	0	0	0	0	0	128
438280839dc29ef4ff390fb4cc2f5079	bASV427	d__Bacteria; p__Bacteroidota; c__Bacteroidia; o__Cytophagales; f__Microscillaceae; g__uncultured	GTAGTCCACACTGTAAACGTTGATGACTCGCTGTTGGCGATACACGGCCAGCGGCAGAGAGAAATCGTTAAGTCATCCACCTGGGGAGTACGCCGGCAACGGTGAAACTCAAAGGAATTGACGGGGGTCCGCACAAGCGGTGGAGCATGTGGTTTAATTCGATGATACGCGAGGAACCTTACCTGGGCTAGAATGCCCTTGATGGGTGCAGAGATGCACTGTTCCGCAAGGACAAGGAGCAAGGTGCTGCATGGCTGTCGTCAGCTCGTGCCGTGAGGTGTTGGGTTAAGTCCCGCAACGAGCGCA	692	248	96	0	0	48	0	35	0	138	288	245	0	273	696	0	0	0	0	54	31	93	0	0	77	0	0	0	38	347	120	291	0	0	510	0	0	0	51	308	93	77	132	316	221	268
942206566d8c41c0cd5a42a2b1e77677	bASV429	d__Bacteria; p__Proteobacteria	GTAGTCCACGCCGGAGCTAACGCGTTAAGTCGACCGCCTGGGGAGTACGGCCTAAACGATGTCGACTTGGAGGTTGTGCCCTTGAGGCGTGGCTTCCGGCAAGGTTAAAACTCAAATGAATTGACGGGGGCCCGCACAAGCGGTGGAGCATGTGGTTTAATTCGATGCAACGCGAAGGAACCGTGAGACAGGTGCTGCATGGCTGTCGTCAGCTCGTGTTGTGAAATGTTGGGTTAAGTCCCGCAACGAGCGCAACCCTCGCCCTTAGTTGCCATCATTTAGTTGGGCACTCTAAGGGGACTGCCG	110	0	0	248	1755	342	153	244	161	0	0	0	187	458	0	0	0	161	0	262	233	285	245	258	129	0	260	251	304	942	0	246	0	476	0	0	72	0	0	0	0	0	0	146	150	138
772e7732c4138fa80cc56417b29616a3	bASV430	d__Bacteria; p__Proteobacteria; c__Alphaproteobacteria; o__Reyranellales; f__Reyranellaceae; g__Reyranella	GTAGTCCACGCCGTAAACGATGGGTGCTAGACGTTGGCGAGCTTGCTCGTCAGTGTCGCAGCTAACGCGTTAAGCACCCCGCCTGGGGAGTACGGCCGCAAGGTTGAAACTCAAAGGAATTGACGGGGGCCCGCACAAGCGGTGGAGCATGTGGTTCAATTCGACGCAACGCGAAGAACCTTACCAGCCCTTGACATGGGAGTCGCCGGGACCAGAGACGGTCCCTTCGGTTCGGCCGGACTCCACACAGGTGCTGCATGGCTGTCGTCAGCTCGTGTCGTGAGATGTTGGGTTAAGTCCCGCAAC	0	0	0	0	735	418	0	0	0	0	0	0	404	44	0	0	0	78	0	0	0	0	2207	100	0	0	198	104	727	0	80	66	0	0	0	336	92	63	0	0	39	68	34	100	0	0
db75ef0985261b030cdda4d8383d4e4c	bASV431	d__Bacteria; p__Proteobacteria; c__Gammaproteobacteria; o__Burkholderiales; f__Comamonadaceae	GTAGTCCACGCCCTAAACGATGTCAACTGGTTGTTGGGAATTAGTTTTCTCAGTAACGAAGCTAACGCGTGAAGTTGACCGCCTGGGGAGTACGGCCGCAAGGTTGAAACTCAAAGGAATTGACGGGGACCCGCACAAGCGGTGGATGATGTGGTTTAATTCGATGCAACGCGAAAAACCTTACCCACCTTTGACATGTACGGAATCCTTTAGAGATAGAGGAGTGCTCGAAAGAGAGCCGTAACACAGGTGCTGCATGGCTGTCGTCAGCTCGTGTCGTGAGATGTTGGGTTAAGTCCCGCAACG	0	0	0	0	0	0	0	0	0	0	0	0	74	0	0	0	0	40	0	21	30	0	15	28	34	0	0	0	14	0	0	0	0	18	0	0	40	14	0	0	24	0	0	16	14	0
4e156f3de84de61c540b95b0b3846678	bASV432	d__Bacteria; p__Proteobacteria; c__Alphaproteobacteria; o__Rhizobiales; f__Xanthobacteraceae; g__Rhodoplanes	GTAGTCCACGCCGTAAACGATGGATGCTAGCCGTTGGTGGGTTTACCCTTCAGTGGCGCAGCTAACGCATTAAGCATCCCGCCTGGGGAGTACGGTCGCAAGATTAAAACTCAAAGGAATTGACGGGGGCCCGCACAAGCGGTGGAGCATGTGGTTCAATTCGAAGCAACGCGCAGAACCTTACCAGCCCTTGACATGTCCCGTATGGGTTTCAGAGATGAGACCCTTCAGTTCGGCTGGCGGGAACACAGGTGCTGCATGGCTGTCGTCAGCTCGTGTCGTGAGATGTTGGGTTAAGTCCCGCAA	180	0	77	422	0	303	122	387	307	238	273	89	397	165	279	0	0	745	153	221	321	302	225	0	339	0	70	0	284	457	162	381	385	422	228	483	0	0	158	479	279	66	132	225	681	188
a5ce2793ad6442dfd2281b987a8d30ab	bASV433	d__Bacteria; p__Proteobacteria; c__Alphaproteobacteria; o__Rhizobiales; f__Methyloligellaceae; g__uncultured	GTAGTCCACGCCGTAAACTATGGGTGCTAGCCGTCGGGGAGCTTGCTCTTCGGTGGCGCAGCTAACGCGTTAAGCACCCCGCCTGGGGAGTACGGTCGCAAGATTAAAACTCAAAGGAATTGACGGGGGCCCGCACAAGCGGTGGAGCATGTGGTTTAATTCGAGGCAACGCGAAGAACCTTACCAGCCCTTGACTTCCCGATCGGGGGACCAGAGATGGACCTCTTCAATTGGTCGGTGACAGGTGCTGCATGGCTGTCGTCAGCTCGTGTCGTGAGATGTTGGGTTAAGTCCCGCAACGAGCGC	114	0	55	82	1098	266	0	50	53	123	101	103	790	188	106	0	0	315	0	122	131	138	194	0	106	0	175	144	1011	371	178	285	164	96	58	313	0	0	0	59	159	107	233	285	539	607
c57afc49acce66cb8408f7872f132a48	bASV434	d__Bacteria; p__Proteobacteria; c__Gammaproteobacteria; o__Burkholderiales; f__Nitrosomonadaceae; g__MND1	GTAGTCCACGCCCTAAACGATGATGACTAGTTGTTGGGGGAGTTAAATCCCTTAGTAACGCAGCTAACGCGTGAAGTCATCCGCCTGGGGAGTACGGTCGCAAGATTAAAACTCAAAGGAATTGACGGGGGCCCGCACAAGCGGTGGATGATGTGGTTTAATTCGACGCAACGCGAAAAACCTTACCTACCCTTGACATGTGAGGAACCCTGCAGAGATGCAGGGGTGCCCGAAAGGGAACCTCAACACAGGTGCTGCATGGCTGTCGTCAGCTCGTGTCGTGAGATGTTGGGTTAAGTCCCGCAA	597	98	205	92	352	404	0	94	34	27	46	185	721	251	175	30	0	436	0	44	54	44	215	45	92	0	84	150	1077	987	551	804	141	148	267	726	0	58	222	617	336	87	61	162	150	180
8937a92fe99c385237e58c73ea820504	bASV435	d__Bacteria; p__Actinobacteriota; c__Actinobacteria; o__Propionibacteriales; f__Nocardioidaceae; g__Nocardioides; s__uncultured_bacterium	GTAGTCCACACCGTAAACGTTGGGCGCTAGGTGTGGGATCCATTCCACGGGTTCCGTGCCGCAGCTAACGCATTAAGCGCCCCGCCTGGGGAGTACGGCCGCAAGGCTAAAACTCAAAGGAATTGACGGGGGCCCGCACAAGCGGCGGAGCATGCGGATTAATTCGATGCAACGCGAAGAACCTTACCTGGGTTTGACATAGGAAGAAATCCATCAGAGATGGTGGGTCCGTAAGGGCTTTCTACAGGTGGTGCATGGCTGTCGTCAGCTCGTGTCGTGAGATGTTGGGTTAAGTCCCGCAACGAG	0	0	0	311	2338	192	133	871	165	312	65	0	245	97	51	0	852	672	192	113	175	639	858	82	137	321	173	120	471	0	57	44	115	191	54	645	48	0	0	0	0	298	71	128	13	119
7a523a6418f1adcbc4f97229dd7d15cb	bASV436	d__Bacteria; p__Firmicutes; c__Bacilli; o__Bacillales; f__Bacillaceae; g__Bacillus; s__Bacillus_litoralis	GTAGTCCACGCCGTAAACGATGAGTGCTAAGTGTTAGAGGGTTTCCGCCCTTTAGTGCTGCAGCTAACGCATTAAGCACTCCGCCTGGGGAGTACGGTCGCAAGACTGAAACTCAAAGGAATTGACGGGGGCCCGCACAAGCGGTGGAGCATGTGGTTTAATTCGAAGCAACGCGAAGAACCTTACCAGGTCTTGACATCCCACTGACCGGTATAGAGATATACCTTTCCCTTCGGGGACAGTGGTGACAGGTGGTGCATGGTTGTCGTCAGCTCGTGTCGTGAGATGTTGGGTTAAGTCCCGCAA	749	347	5298	841	0	158	0	998	463	146	224	228	89	84	0	0	0	505	109	314	693	2747	26	35	1496	1364	0	0	162	0	0	0	0	257	0	0	118	0	0	58	43	486	380	212	215	0
5f987204f80a987ea72ee6e8e292dcdc	bASV437	d__Bacteria; p__Actinobacteriota; c__Thermoleophilia; o__Gaiellales; f__Gaiellaceae; g__Gaiella	GTAGTCCACGCCGTAAACGATGGGCGCTAGGTGTGGGAGGTGTCGACTCCTTCCGTGCCGAAGCTAACGCATTAAGCGCCCCGCCTGGGGAGTACGGCCGCAAGGCTAAAACTCAAAGGAATTGACGGGGGCCCGCACAAGCAGCGGAGCATGTGGTTTAATTGGATGCGACGCCAAGAACCTTACCAAGGCTTAACTATGTTGGGAAAGCCGGAGAAATTCGGCCCTCCTTCGGGACCCATCACTAGGTGGTGCATGGCTGTCGTCAGCTCGTGTCGTGAGATGTTGGGTTAAGTCCCGCAACGA	1066	202	369	0	0	40	0	0	0	0	0	257	0	80	249	0	0	0	0	0	0	0	13	0	0	0	0	0	134	286	99	135	0	0	365	280	0	0	514	1337	1358	224	516	665	213	56
7a2759a80a6d1c5c6d2dd5e28b4bc689	bASV438	d__Bacteria; p__Proteobacteria; c__Gammaproteobacteria; o__Enterobacterales; f__Erwiniaceae; g__Erwinia	GTAGTCCACGCTGTAAACGATGTCGACTTGGAGGTTGTGCCCTTGAGGCGTGGCTTCCGGAGCTAACGCGTTAAGTCGACCGCCTGGGGAGTACGGCCGCAAGGTTAAAACTCAAATGAATTGACGGGGGCCCGCACAAGCGGTGGAGCATGTGGTTTAATTCGATGCAACGCGAAGAACCTTACCTGGCCTTGACATCCACGGAATTTGGCAGAGATGCCTTAGTGCCTTCGGGAACCGTGAGACAGGTGCTGCATGGCTGTCGTCAGCTCGTGTTGTGAAATGTTGGGTTAAGTCCCGCAACGA	212	0	120	0	0	0	0	51	21	0	0	93	480	0	0	0	0	0	0	20	0	0	0	0	0	0	0	0	0	0	16	0	0	0	0	0	23	0	0	21	0	0	0	0	54	0
45e90295d7d70fb45cdac4dc5ae3d464	bASV439	d__Bacteria; p__Proteobacteria; c__Gammaproteobacteria; o__PLTA13; f__PLTA13; g__PLTA13	GTAGTCCACGCCCTAAACGATGACGACTGGATGTCGGAGGGGTCTGCCTTTCGGTGTCGTAGCTAACGCGTTAAGTCGTCCGCCTGGGGAGTACGGCCGCAAGGTTGAAACTCAAAGGAATTGACGGGGACCCGCACAAGCGGTGGAGCATGTGGTTCAATTCGATGCAACGCGAAGAACCTTACCTGGCCTTGACATCCGCGGAACTCGGCAGAAATGCCTTGGTGCCTTCGGGAATCGCGAGACAGGTGCTGCATGGCTGTCGTCAGCTCGTGTCGTGAGATGTTGGGTTAAGTCCCGCAACGA	599	117	220	0	0	84	56	114	0	227	279	172	0	0	233	0	0	325	117	82	188	367	0	0	200	0	0	0	0	0	0	0	210	0	146	0	0	9	398	1763	823	0	0	100	304	0
8b9a8aa9d0001c12f9f9d5c4bbe49249	bASV440	d__Bacteria; p__Firmicutes; c__Bacilli; o__Bacillales; f__Bacillaceae; g__Bacillus	GTAGTCCACGCTGTAAACGATGAGTGCTAAGTGTTAGAGGGTTTCCGCCCTTTAGTGCTGCAGCTAACGCATTAAGCACTCCGCCTGGGGAGTACGGCCGCAAGGCTGAAACTCAAAGGAATTGACGGGGACCCGCACAAGCGGTGGAGCATGTGGTTTAATTCGAAGCAACGCGAAGAACCTTACCAGGTCTTGACATCCTCTGACACTCCTAGAGATAGGACGTTCCCCTTCGGGGGACAGAGTGACAGGTGGTGCATGGTTGTCGTCAGCTCGTGTCGTGAGATGTTGGGTTAAGTCCCGCAA	37	0	0	1014	0	313	0	1627	559	74	0	0	366	65	69	0	0	214	0	77	45	91	0	0	0	0	0	0	0	0	0	0	0	0	0	0	37	0	41	94	73	122	197	147	351	167
055c1942ab472024bab8785c2d61c2f5	bASV441	d__Bacteria; p__Proteobacteria; c__Alphaproteobacteria; o__Rhizobiales; f__Xanthobacteraceae; g__uncultured	GTAGTCCACGCCGTAAACGATGGATGCTAGCCGTTGGCGGGTTTACTCGTCAGTGGCGCAGCTAACGCTTTAAGCATCCCGCCTGGGGAGTACGGTCGCAAGATTAAAACTCAAAGGAATTGACGGGGGCCCGCACAAGCGGTGGAGCATGTGGTTCAATTCGAAGCAACGCGCAGAACCTTACCAGCCCTTGACATCCCGGTCGCGGGAACCAGAGATGGATCCCTTCAGTTCGGCTGGACCGGAGACAGGTGCTGCATGGCTGTCGTCAGCTCGTGTCGTGAGATGTTGGGTTAAGTCCCGCAA	0	0	0	296	1300	949	144	270	127	0	0	0	635	0	0	0	0	0	114	46	0	357	312	330	0	0	0	0	0	0	0	0	0	0	0	0	0	0	0	0	0	0	0	0	0	0
aa132a481024b2b8492236beeaa24afe	bASV442	d__Bacteria; p__Proteobacteria; c__Alphaproteobacteria; o__Rhizobiales; f__Xanthobacteraceae; g__Rhodoplanes	GTAGTCCACGCCGTAAACGATGGATGCTAGCCGTTGGCGGGTTTACCCGTCAGTGGCGCAGCTAACGCATTAAGCATCCCGCCTGGGGAGTACGGTCGCAAGATTAAAACTCAAAGGAATTGACGGGGGCCCGCACAAGCGGTGGAGCATGTGGTTCAATTCGAAGCAACGCGCAGAACCTTACCAGCCCTTGACATGTCCCGTATGGGTTTCAGAGATGAGACCCTTCAGTTCGGCTGGCGGGAACACAGGTGCTGCATGGCTGTCGTCAGCTCGTGTCGTGAGATGTTGGGTTAAGTCCCGCAA	196	0	247	0	3236	312	0	253	0	323	415	99	307	189	497	0	0	706	0	164	135	246	0	0	185	1417	0	0	243	0	99	133	175	0	435	0	0	0	250	444	275	127	151	222	748	59
95d85da811246ae83619b97ca202a8f7	bASV443	d__Bacteria; p__Proteobacteria; c__Alphaproteobacteria; o__Rhizobiales; f__Xanthobacteraceae; g__Bradyrhizobium	GTAGTCCACGCCGTAAACGATGAATGCCAGCCGTTAGTGGGTTTACTCACTAGTGGCGCAGCTAACGCTTTAAGCATTCCGCCTGGGGAGTACGGTCGCAAGATTAAAACTCAAAGGAATTGACGGGGGCCCGCACAAGCGGTGGAGCATGTGGTTTAATTCGACGCAACGCGCAGAACCTTACCAGCCCTTGACATGTCCGGGACCGGTCGCAGAGATGTGACCCTCTCTTCGGAGCCCGGAACACAGGTGCTGCATGGCTGTCGTCAGCTCGTGTCGTGAGATGTTGGGTTAAGTCCCGCAACG	0	0	47	222	0	157	0	200	115	222	0	0	215	77	0	0	0	130	0	0	69	157	216	35	51	0	67	49	311	0	0	0	0	0	154	0	322	257	0	0	0	192	129	207	0	74
a40cb449da62c4389219604bdef8fa72	bASV444	d__Bacteria; p__Proteobacteria; c__Alphaproteobacteria; o__Caulobacterales; f__Caulobacteraceae	GTAGTCCACGCCGTAAACGATGAGTGCTAGTTGTCGGCATGCATGCATGTCGGTGACGCAGCTAACGCATTAAGCACTCCGCCTGGGGAGTACGGTCGCAAGATTAAAACTCAAAGGAATTGACGGGGGCCCGCACAAGCGGTGGAGCATGTGGTTTAATTCGAAGCAACGCGCAGAACCTTACCACCTTTTGACATGCCCTGACCGCCGGAGAGATCCGGTTTTCCCTTCGGGGACAGGGACACAGGTGCTGCATGGCTGTCGTCAGCTCGTGTCGTGAGATGTTGGGTTAAGTCCCGCAACGAG	80	85	90	131	1065	238	115	215	73	136	0	44	211	0	0	0	0	325	205	98	112	145	500	100	151	0	0	0	128	0	0	0	171	160	0	0	691	352	79	192	137	909	524	854	400	155
13b693f1d6edfa0b179b7902ff40cecc	bASV445	d__Bacteria; p__Proteobacteria; c__Gammaproteobacteria; o__Pseudomonadales; f__Pseudomonadaceae; g__Pseudomonas	GTAGTCCACGCCGTAAACGATGTCGACTAGCCGTTGGGATCCTTGAGATCTTAGTGGCGAAGCTAACGCGATAAGTCGACCGCCTGGGGAGTACGGCCGCAAGGTTAAAACTCAAATGAATTGACGGGGGCCCGCACAAGCGGTGGAGCATGTGGTTTAATTCGAAGCAACGCGAAGAACCTTACCTGGCCTTGACATGCTGAGAACTTTCCAGAGATGGATTGGTGCCTTCGGGAACTCAGACACAGGTGCTGCATGGCTGTCGTCAGCTCGTGTCGTGAGATGTTGGGTTAAGTCCCGTAACGA	0	0	0	0	0	0	0	0	0	0	0	0	98	0	0	0	0	0	0	0	0	0	0	58	0	0	0	0	0	0	0	0	387	0	0	0	0	0	0	0	0	0	0	0	0	0
41b35f0e15743a5b86eaace871be8c9f	bASV446	d__Bacteria; p__Proteobacteria; c__Alphaproteobacteria; o__Sphingomonadales; f__Sphingomonadaceae; g__Sphingobium	GTAGTCCACGCCGTAAACGATGATAACTAGCTGCCGGGGCACATGGTGTTTCGGTGGCGCAGCTAACGCATTAAGTTATCCGCCTGGGGAGTACGGTCGCAAGATTAAAACTCAAAGGAATTGACGGGGGCCTGCACAAGCGGTGGAGCATGTGGTTTAATTCGAAGCAACGCGCAGAACCTTACCAACGTTTGACATCCCTATCGCGGATCGTGGAGACACTTTCCTTCAGTTCGGCTGGATAGGTGACAGGTGCTGCATGGCTGTCGTCAGCTCGTGTCGTGAGATGTTGGGTTAAGTCCCGCA	490	0	344	0	0	0	0	93	20	106	0	582	26	80	113	0	109	0	0	0	16	0	69	105	0	0	48	0	81	0	0	0	0	0	0	0	0	0	56	0	0	0	0	0	85	0
8ad1f849fa8afa773d0f686cfba921b1	bASV447	d__Bacteria; p__Firmicutes; c__Clostridia; o__Clostridiales; f__Clostridiaceae; g__Clostridium_sensu_stricto_13	GTAGTCCACGCCGTAAACGATGAATACTAGGTGTAGGAGGTATCGACCCCTTCTGTGCCGCAGTTAACACAATAAGTATTCCGCCTGGGGAGTACGATCGCAAGATTAAAACTCAAAGGAATTGACGGGGGCCCGCACAAGCAGCGGAGCATGTGGTTTAATTCGAAGCAACGCGAAGAACCTTACCTAGACTTGACATCTCCTGAATTACCCTTAATCGGGGAAGCCCTTCGGGGCAGGAAGACAGGTGGTGCATGGTTGTCGTCAGCTCGTGTCGTGAGATGTTGGGTTAAGTCCCGCAACGAG	269	89	130	0	0	111	0	0	0	0	53	77	237	82	616	0	0	33	0	0	82	79	219	174	38	0	733	399	1860	0	30	73	0	0	390	0	26	0	0	60	0	95	0	103	64	45
b5178726fa3aaf204de77b343ad0ede6	bASV448	d__Bacteria; p__Acidobacteriota; c__Acidobacteriae; o__Acidobacteriales; f__uncultured; g__uncultured; s__uncultured_forest	GTAGTCCTAGCCCTAAACGATGATTGCTTGGTGTAGCAGGTACCCAATCCTGCTGTGCCGCAGCTAACGCGATAAGCAATCCGCCTGGGGAGTACGGTCGCAAGGCTGAAACTCAAAGGAATTGACGGGGGCCCGCACAAGCGGTGGAGCATGTGGTTCAATTCGACGCAACGCGAAGAACCTTACCTGGGCTCGAAATGCAGGAGATCGGGGTGGAAACATCCCTTCCCCTTAAAAGGCTGCTGCATAGGTGCTGCATGGCTGTCGTCAGCTCGTGTCGTGAGATGTTGGGTTAAGTCCCGCAAC	0	0	0	46	0	224	0	0	0	0	0	0	873	56	0	0	0	0	0	128	0	502	869	1376	37	0	0	0	0	0	108	13	0	0	0	0	58	0	0	0	0	0	0	0	0	0
b7afc78585932ad23a0ad4c08e87f0b3	bASV449	d__Bacteria; p__Actinobacteriota; c__Actinobacteria; o__Corynebacteriales; f__Nocardiaceae; g__Rhodococcus	GTAGTCCACGCCGTAAACGGTGGGCGCTAGGTGTGGGTTTCCTTCCACGGGATCCGTGCCGTAGCTAACGCATTAAGCGCCCCGCCTGGGGAGTACGGCCGCAAGGCTAAAACTCAAAGGAATTGACGGGGGCCCGCACAAGCGGCGGAGCATGTGGATTAATTCGATGCAACGCGAAGAACCTTACCTGGGTTTGACATATACCGGAAAGCCGTAGAGATACGGCCCCCCTTGTGGTCGGTATACAGGTGGTGCATGGCTGTCGTCAGCTCGTGTCGTGAGATGTTGGGTTAAGTCCCGCAACGA	484	0	347	263	444	233	104	519	198	239	106	157	89	186	287	0	591	313	107	204	127	671	63	35	254	706	48	94	124	217	51	66	90	211	98	0	114	30	30	72	40	103	213	267	271	62
a7a9017484c65c8bfc694082d1922771	bASV450	d__Bacteria; p__Proteobacteria; c__Alphaproteobacteria; o__Rhizobiales; f__Rhizobiaceae	GTAGTCCACGCCGTAAACGATGGAAGCTAGCCGTTGGCAAGTTTACTTGTCGGTGGCGCAGCTAACGCATTAAGCTTCCCGCCTGGGGAGTACGGTCGCAAGATTAAAACTCAAAGGAATTGACGGGGGCCCGCACAAGCGGTGGAGCATGTGGTTTAATTCGAAGCAACGCGCAGAACCTTACCAGCCCTTGACATCCCGGTCGCGGCCTTCAGAGATGAAGGCCTTCAGTTCGGCTGGACCGGTGACAGGTGCTGCATGGCTGTCGTCAGCTCGTGTCGTGAGATGTTGGGTTAAGTCCCGCAA	0	0	47	1975	0	1617	102	2677	1010	1110	473	0	2137	771	137	0	583	1615	131	363	991	1059	0	0	930	1005	0	0	44	0	0	0	338	377	0	0	0	0	0	0	0	0	0	0	121	429
d6b0bade0573cbf9ca790c33b27ee91d	bASV451	d__Bacteria; p__Proteobacteria; c__Gammaproteobacteria; o__Burkholderiales; f__Sutterellaceae; g__uncultured; s__uncultured_bacterium	GTAGTCCACGCCCTAAACGATGTCGACTAGTTGTCGGGGATTTACATCCTCGGTAACGCAGCTAACGCGTGAAGTCGACCGCCTGGGGAGTACGGTCGCAAGATTAAAACTCAAAGGAATTGACGGGGACCCGCACAAGCGGTGGATGATGTGGATTAATTCGATGCAACGCGAAAAACCTTACCTACCCTTGACATGCCCGGAAGCTCGCAGAGATGTGAGCGTGCCCGAAAGGGAGCCGGGACACAGGTGCTGCATGGCTGTCGTCAGCTCGTGTCGTGAGATGTTGGGTTAAGTCCCGCAACG	28	23	32	571	331	507	180	969	350	317	390	0	1076	211	185	0	564	1541	207	203	367	1087	524	196	416	204	103	65	495	0	50	98	293	401	109	259	0	0	47	123	119	51	28	99	122	224
4bf8e5965cafa110fb20044adaa9fb6b	bASV452	d__Bacteria; p__Acidobacteriota; c__Subgroup_5; o__Subgroup_5; f__Subgroup_5; g__Subgroup_5; s__uncultured_bacterium	GTAGTCCTAGCCCTAAACGATGGATACTTGCTGTGACTGGGATTGAATCCAGTCGTGGCGAAGCTAACGCATTAAGTATCCCGCCTGGGGAGTACGGTCGCAAGGCTGAAACTCAAAGGAATTGACGGGGGCCCGCACAAGCGGTGGAGTATGTGGTTTAATTCGACGCAACGCGAAGAACCTTACCTGGGCTCGAACGGCTAGTGACAGGGGTGGAAACATCCTTTTCCCGCAAGGGACACTAGTCGAGGTGCTGCATGGCTGTCGTCAGCTCGTGTCGTGAGATGTTGGGTTAAGTCCCGCAAC	214	43	84	644	776	684	151	870	524	257	231	141	661	216	83	0	450	851	166	143	284	387	142	37	406	0	97	79	387	378	117	270	254	296	69	357	0	0	53	68	92	117	176	219	111	245
0e052955a8f9a4b397bacf0f44c3fcaa	bASV453	d__Bacteria; p__Acidobacteriota; c__Acidobacteriae; o__Acidobacteriales; f__uncultured; g__uncultured; s__uncultured_Acidobacteria	GTAGTCCTAGCCCTAAACTATGGATGCTTGGTGTAGTGGGTACCCAATCCCACTGTGCCGCAGCTAACGCGTTAAGCATCCCGCCTGGGGAGTACGGTCGCAAGGCTGAAACTCAAAGGAATTGACGGGGGCCCGCACAAGCGGTGGAGCATGTGGTTCAATTCGACGCAACGCGAAGAACCTTACCTGGGCTCGAAGCGCAGTGGAATGAGGTGGAAACATCTCAGCCCGCAAGGGCCGCTGCGGAGGTGCTGCATGGCTGTCGTCAGCTCGTGTCGTGAGATGTTGGGTTAAGTCCCGCAACGA	0	0	0	40	352	739	47	61	33	10	0	0	1049	53	0	0	0	339	55	18	0	127	699	464	0	0	46	49	190	0	116	0	23	0	0	283	1651	586	0	0	0	31	18	0	0	46
6b4a94c1b2dee45e4c87ced2e58fc609	bASV454	d__Bacteria; p__Proteobacteria; c__Alphaproteobacteria; o__Rhizobiales; f__Labraceae; g__Labrys	GTAGTCCACGCCGTAAACGATGGATGCTAGCCGTCGGGGAGCTTGCTCTTCGGTGGCGCAGTCAACACTTTAAGCATCCCGCCTGGGGAGTACGGTCGCAAGATTAAAACTCAAAGGAATTGACGGGGGCCCGCACAAGCGGTGGAGCATGTGGTTTAATTCGAAGCAACGCGCAGAACCTTACCAGCCCTTGACATCCCGGTCGCGGTTTCCAGAGATGGATTCCTTCAGTTCGGCTGGACCGGTGACAGGTGCTGCATGGCTGTCGTCAGCTCGTGTCGTGAGATGTTGGGTTAAGTCCCGCAA	84	34	86	239	255	224	106	292	93	281	140	48	207	186	81	0	455	452	107	109	306	336	388	62	263	250	172	97	301	0	55	47	140	128	97	352	349	165	129	314	248	113	139	248	161	64
45df7e4a3a41dc9d29cb84241e3a3cbd	bASV455	d__Bacteria; p__Proteobacteria; c__Alphaproteobacteria; o__Sphingomonadales; f__Sphingomonadaceae; g__Novosphingobium	GTAGTCCACGCCGTAAACGATGATAACTAGCTGTCCGGGCACTTGGTGCTTGGGTGGCGCAGCTAACGCATTAAGTTATCCGCCTGGGGAGTACGGTCGCAAGATTAAAACTCAAAGGAATTGACGGGGGCCTGCACAAGCGGTGGAGCATGTGGTTTAATTCGAAGCAACGCGCAGAACCTTACCAGCCTTTGACATCCCGCGCTACTTTCAGAGATGATTGGTTCCCTTCGGGGACGCGGTGACAGGTGCTGCATGGCTGTCGTCAGCTCGTGTCGTGAGATGTTGGGTTAAGTCCCGCAACGA	184	75	94	221	0	120	0	615	86	57	0	77	413	81	0	0	0	324	67	0	0	0	261	76	68	0	240	156	811	661	106	250	91	99	114	904	163	45	207	509	396	264	455	453	34	102
40c699f4021d13fb81e88e1dc31eb86d	bASV456	d__Bacteria; p__Proteobacteria; c__Gammaproteobacteria; o__Steroidobacterales; f__Steroidobacteraceae; g__uncultured	GTAGTCCACGCCCTAAACGATGAGAACTGGATGTCGGGAGGGTTTGCCTTCCGGTGTCGTAGCTAACGCGTTAAGTTCTCCGCCTGGGAAGTACGGCCGCAAGGTTGAAACTCAAAGGAATTGACGGGGACCCGCACAAGCGGTGGAGCATGTGGTTTAATTCGATGCAACGCGAAGAACCTTACCTGGTCTTGACATCCCAGGAATCCTGCAGAGATGCGGGAGTGCCTTCGGGAACCTGGAGACAGGTGCTGCATGGCTGTCGTCAGCTCGTGTCGTGAGATGTTGGGTTAAGTCCCGCAACGA	101	0	131	0	457	540	60	0	142	211	0	0	445	211	282	0	0	504	98	81	219	192	1188	75	137	0	734	483	791	0	139	223	117	112	197	480	47	0	73	205	142	90	106	146	78	608
2a34b96c6100c9b02aee7ece189f69da	bASV457	d__Bacteria; p__Proteobacteria; c__Alphaproteobacteria; o__Sphingomonadales; f__Sphingomonadaceae; g__Sphingomonas	GTAGTCCACGCCGTAAACGATGATGACTAGCTGTCGGGGCTCATGGAGTTTCGGTGGCGCAGCTAACGCGTTAAGTCATCCGCCTGGGGAGTACGGCCGCAAGGTTAAAACTCAAAGAAATTGACGGGGGCCTGCACAAGCGGTGGAGCATGTGGTTTAATTCGAAGCAACGCGCAGAACCTTACCAGCGTTTGACATGGTAGGACGGTTTCCAGAGATGGATTCTTTCCCTTACGGGACCTACACACAGGTGCTGCATGGCTGTCGTCAGCTCGTGTCGTGAGATGTTGGGTTAAGTCCCGCAAC	0	0	118	0	0	194	0	95	0	0	0	0	800	0	214	0	0	455	0	0	0	0	0	0	0	0	0	0	233	0	248	311	0	0	422	0	0	0	0	0	84	143	285	308	183	87
a9ef5ce48aaa8131fd9adf3a97f0191b	bASV458	d__Bacteria; p__Acidobacteriota; c__Acidobacteriae; o__Subgroup_2; f__Subgroup_2; g__Subgroup_2	GTAGTCCTAGCCCTAAACGATCAGGACTTGGGGTGCCGCCCGTTCGGGCGTCGTCCCGGAGCTAACGCGTTAAGTCCTGCACCTGGGGAGTACGGTCGCAAGACTGAAACTCAAAGGAATTGACGGGGGCCCGCACAAGCGGTGGAACATGTGGTTCAATTCGACGCTACGCGAGGAACCTTACCTGGGCTCGAAATGCTAGTGACCAGCTGTAGAAATACGGCCTTCCCGCAAGGGACACTAGTATAGGCGCTGCATGGCTGTCGTCAGCTCGTGCCGTGAGGTGTTGGGTTAAGTCCCGCAACG	0	0	0	0	0	0	59	0	0	0	0	0	0	0	0	0	0	0	0	139	0	0	716	879	0	0	0	0	0	0	299	0	0	0	0	0	210	72	0	0	0	0	0	0	0	0
89cd080c874635dfa5d4144d10207b30	bASV459	d__Bacteria; p__Desulfobacterota; c__uncultured; o__uncultured; f__uncultured; g__uncultured; s__uncultured_soil	GTAGTCCACGCTGTAAACGATGAGCACTAGGTGTCGTGGGTATTGACCCCCGCGGTGCCGTAGCTAACGCATTAAGTGCTCCGCCTGGGGACTACGGCCGCAAGGTTAAAACTCAAAGGAATTGACGGGGGCCCGCACAAGCGGTGGAGCATGTGGTTCAATTCGACGCAACGCGAAGAACCTTACCTGGGCTAGACAACGGAGGACAGCTCCAGAGATGGGGTCTTCCCTTCGGGGACCTCCGGTTCAGGTGCTGCATGGCTGTCGTCAGCTCGTGTCGTGAGATGTTGGGTTAAGTCCCGCAAC	94	56	103	758	0	546	145	799	544	264	374	0	1247	280	347	0	0	1565	226	308	572	244	57	0	727	0	75	68	415	71	103	129	459	817	115	0	0	0	103	230	146	110	243	354	527	314
1566af16d9e018119d0837d31a4277d1	bASV460	d__Bacteria; p__Proteobacteria; c__Alphaproteobacteria; o__Rhizobiales; f__Methyloligellaceae; g__uncultured	GTAGTCCACGCCGTAAACTATGGGTGCTAGCCGTCGGAGAGCTTGCTCTTCGGTGGCGCAGCAAACGCGTTAAGCACCCCGCCTGGGGAGTACGGTCGCAAGATTAAAACTCAAAGGAATTGACGGGGGCCCGCACAAGCGGTGGAGCATGTGGTTTAATTCGAGGCAACGCGAAGAACCTTACCAGCCCTTGACTTCCCGATCGGGGGACCAGAGATGGACCTCTTCAATTGGTCGGTGACAGGTGCTGCATGGCTGTCGTCAGCTCGTGTCGTGAGATGTTGGGTTAAGTCCCGCAACGAGCGC	248	77	251	0	0	0	0	0	0	0	0	147	0	0	74	0	0	0	0	0	0	0	0	30	0	0	0	0	64	0	78	168	0	0	129	0	0	0	266	644	810	0	0	0	692	0
085c5294ce8a810ae4cb77d14c004b57	bASV462	d__Bacteria; p__Actinobacteriota; c__Actinobacteria; o__Corynebacteriales; f__Mycobacteriaceae; g__Mycobacterium	GTAGTCCACGCCGTAAACGGTGGGTACTAGGTGTGGGTTTCCTTCCTTGGGATCCGTGCCGTAGCTAACGCATTAAGTACCCCGCCTGGGGAGTACGGCCGCAAGGCTAAAACTCAAAGGAATTGACGGGGGCCCGCACAAGCGGCGGAGCATGTGGATTAATTCGATGCAACGCGAAGAACCTTACCTGGGTTTGACATGCACAGGACGCTGGTAGAGATATCAGTTCCCTTGTGGCCTGTGTGCAGGTGGTGCATGGCTGTCGTCAGCTCGTGTCGTGAGATGTTGGGTTAAGTCCCGCAACGA	338	0	182	392	0	145	0	595	285	289	278	121	61	119	334	0	0	299	0	296	225	236	65	67	131	0	113	58	361	0	0	49	0	0	0	0	0	0	0	0	120	0	59	118	62	88
c2379f2a007b0b06c1a5710958f4ba16	bASV463	d__Bacteria; p__Actinobacteriota; c__Acidimicrobiia; o__Microtrichales; f__Ilumatobacteraceae; g__uncultured	GTAGTCCACGCCGTAAACGTTGGGCACTAGGTGTGGGTCTCAACCAACGAGATCCGCGCCGTCGCTAACGCATTAAGTGCCCCGCCTGGGGAGTACGGTCGCAAGACTAAAACTCAAAGGAATTGACGGGGGCCCGCACAAGCAGCGGAGCGTGTTGCTTAATTCGATGTTACGCGAAGAACCTTACCTGGGTTTGACATGTAGGGAAAAGCTCTGGAGACAGGGTGTCCTAACGGGCCCTACACAGGTGGTGCATGGCTGTCGTCAGCTCGTGTCGTGAGATGTTGGGTTAAGTCCCGCAACGAG	999	187	393	0	0	72	0	97	34	223	192	381	33	106	623	0	0	101	0	37	114	133	65	0	93	0	0	0	165	0	77	130	0	0	413	0	0	0	484	1407	1214	266	391	766	179	149
8ed96e5818c3f07291eca4c48ecbe384	bASV464	d__Bacteria; p__Proteobacteria; c__Alphaproteobacteria; o__Azospirillales; f__uncultured; g__uncultured; s__uncultured_bacterium	GTAGTCCACGCCGTAAACGATGAGTGCTAGACGTTGGGAGGCCTAGCCTTCCGGTGTCGCAGCTAACGCATTAAGCACTCCGCCTGGGGAGTACGGCCGCAAGGTTAAAACTCAAAGGAATTGACGGGGGCCCGCACAAGCGGTGGAGCATGTGGTTTAATTCGAAGCAACGCGCAGAACCTTACCAGCCCTTGACATGGGGAGTGTGAGCCTGGGAGACCGGGTTCTTCAGTTCGGCTGGCTCCCGCACAGGTGCTGCATGGCTGTCGTCAGCTCGTGTCGTGAGATGTTGGGTTAAGTCCCGCA	0	0	29	805	0	586	119	954	652	116	0	0	1544	391	118	0	79	1645	61	125	361	216	130	30	230	197	202	115	217	0	0	0	363	484	0	0	0	0	50	145	121	208	345	437	199	343
2c15b70110d35f34ee1a46a0e26febb0	bASV465	d__Bacteria; p__Acidobacteriota; c__Acidobacteriae; o__Acidobacteriales; f__Acidobacteriaceae_(Subgroup_1); g__Edaphobacter	GTAGTCCTAGCCCTAAACGATGATTGCTTGGTGTGACAGGTACCCAATCCTGTCGTGCCGAAGCTAACGCGATAAGCAATCCGCCTGGGGAGTACGGTCGCAAGGCTGAAACTCAAAGGAATTGACGGGGGCCCGCACAAGCGGTGGAGCATGTGGTTTAATTCGACGCAACGCGAAGAACCTTACCTGGGCTCGAAATGTAGTGGACCGGGGTAGAAATATCCCTTTCTAGCAATAGACTGCTATATAGGTGCTGCATGGCTGTCGTCAGCTCGTGTCGTGAGATGTTGGGTTAAGTCCCGCAAC	0	0	0	0	1874	104	0	0	0	0	0	0	553	24	0	0	0	0	0	41	0	0	1328	626	0	0	72	41	165	0	35	0	0	0	0	166	1322	303	0	0	0	0	0	0	0	0
a27cb0565f2f38729fd28211ae80a2cc	bASV466	d__Bacteria; p__Bacteroidota; c__Bacteroidia; o__Flavobacteriales; f__Weeksellaceae; g__Chryseobacterium	GTAGTCCACGCCGTAAACGATGCTAACTCGTTTTTGGTATTTCGGTATCAGAGACTAAGCGAAAGTGATAAGTTAGCCACCTGGGGAGTACGTTCGCAAGAATGAAACTCAAAGGAATTGACGGGGGCCCGCACAAGCGGTGGATTATGTGGTTTAATTCGATGATACGCGAGGAACCTTACCAAGGCTTAAATGGGAAATGACAGGTTTAGAAATAGACTTTTCTTCGGACATTTTTCAAGGTGCTGCATGGTTGTCGTCAGCTCGTGCCGTGAGGTGTTAGGTTAAGTCCTGCAACGAGCGCAA	0	0	0	44	0	0	114	20	0	0	0	0	0	0	0	0	0	26	82	0	0	54	0	0	0	0	0	25	0	0	0	0	0	0	53	0	0	0	0	0	0	0	0	0	0	0
9dd3af2559f63d709533cde15bfaa397	bASV467	d__Bacteria; p__Proteobacteria; c__Alphaproteobacteria; o__Rhizobiales; f__Xanthobacteraceae	GTAGTCCACGCCGTAAACGATGGATGCTAGCCGTTGGCGAGCTTGCTCGTCAGTGGCGCAGCTAACGCATTAAGCATCCCGCCTGGGGAGTACGGTCGCAAGATTAAAACTCAAAGGAATTGACGGGGGCCCGCACAAGCGGTGGAGCATGTGGTTCAATTCGAAGCAACGCGAAGAACCTTACCAACCTTTGACATGTCCCGTATGGGTTTCAGAGATGAGATCCTTCAGTTCGGCTGGCGGGAACACAGGTGCTGCATGGCTGTCGTCAGCTCGTGTCGTGAGATGTTGGGTTAAGTCCCGCAA	202	33	103	172	0	560	0	294	94	228	152	81	391	427	1231	0	0	666	0	62	0	0	127	0	0	0	0	49	706	441	462	483	131	108	470	354	0	0	176	638	430	136	194	435	68	585
a6d7759660bb0dd49ae0bd2631bb1d8b	bASV468	d__Bacteria; p__Chloroflexi; c__TK10; o__TK10; f__TK10; g__TK10; s__uncultured_bacterium	GTAGTCCACGCTGTAAACGATGCGCACTAGGTGTCGGGGGTATCGACCCCCTCGGTGCCGCAGCTAACGCGATAAGTGCGCCGCCTGGGGACTACGGCCGCAAGGCTAAAACTCAAAGGAATTGACGGGGGCCCGCACAAGCAGCGGAGCGTGTGGTTTAATTCGACGCAACGCGAAGAACCTTACCTGGGCTTGACATGCGTGTGGTACGGAGCCGAAAGGCCGAGGACCCGCAAGGGAGCACGCACAGATGCTGCATGGCTGTCGTCAGCTCGTGCCGTGAGGTGTTGGGTTAAGTCCCGCAAC	0	0	0	704	969	245	131	830	510	113	0	0	1412	86	0	0	395	640	175	41	344	116	2580	29	190	0	124	52	383	0	69	63	107	153	0	830	103	11	0	0	0	1157	254	854	0	97
cfcf186ce013a750f7c91257e3093acd	bASV469	d__Bacteria; p__Actinobacteriota; c__Actinobacteria; o__Micrococcales; f__Intrasporangiaceae	GTAGTCCATGCCGTAAACGTTGGGAACTAGGTGTGGGTCTCATTCCACGAGATCCGTGCCGCAGCTAACGCATTAAGTTCCCCGCCTGGGGAGTACGGCCGCAAGGCTAAAACTCAAAGGAATTGACGGGGGCCCGCACAAGCGGCGGAGCATGCGGATTAATTCGATGCAACGCGAAGAACCTTACCAAGGCTTGACATATACCGGAAACACTCAGAGATGGGTGCCCCGCAAGGTCGGTATACAGGTGGTGCATGGTTGTCGTCAGCTCGTGTCGTGAGATGTTGGGTTAAGTCCCGCAACGAG	253	95	166	230	0	0	63	367	72	123	277	54	48	107	135	0	0	79	0	82	0	133	342	62	29	0	122	112	253	0	99	165	119	0	148	655	46	0	100	307	351	234	253	338	73	38
44d227a0987f5f521d83331872b353a0	bASV470	d__Bacteria; p__Actinobacteriota; c__Actinobacteria; o__Corynebacteriales; f__Mycobacteriaceae; g__Mycobacterium	GTAGTCCACGCCGTAAACGGTGGGTACTAGGTGTGGGTTTCCTTCCTTGGGATCCGTGCCGTAGCTAACGCATTAAGTACCCCGCCTGGGGAGTACGGCCGCAAGGCTAAAACTCAAAGGAATTGACGGGGGCCCGCACAAGCGGCGGAGCATGTGGATTAATTCGATGCAACGCGAAGAACCTTACCTGGGTTTGACATGCACAGGACGCCGGTAGAGATATCGGTTCCCTTGTGGCCTGTGTGCAGGTGGTGCATGGCTGTCGTCAGCTCGTGTCGTGAGATGTTGGGTTAAGTCCCGCAACGA	569	0	68	296	0	327	0	290	226	0	0	243	97	226	213	0	0	192	147	0	125	172	77	98	0	0	35	0	357	0	0	42	0	0	208	0	0	0	170	416	467	141	159	187	131	100
61f5365a21a119e3dd9275206e9a4b48	bASV471	d__Bacteria; p__Actinobacteriota; c__Acidimicrobiia	GTAGTCCACGCCGTAAACGTTGGGCACTAGGTGTGGGGTTCTATCGACGGATTCCGTGCCGTAGCTAACGCATTAAGTGCCCCGCCTGGGGAGTACGGCCGCAAGGCTAAAACTCAAAGGAATTGACGGGGGCCCGCACAAGCGGCGGAGCATGTTGCTTAATTCGATGCAACGCGAAGAACCTTACCTGGGTTTGACATGTAGGGAAAAGCCGTAGAGATACGGTGTCCTTCGGGGTCCTACACAGGTGGTGCATGGCTGTCGTCAGCTCGTGTCGTGAGATGTTGGGTTAAGTCCCGCAACGAG	0	0	0	564	524	422	151	718	359	290	174	0	1553	314	170	0	782	1472	201	204	406	273	101	0	364	937	121	87	547	0	0	20	434	527	0	666	0	0	0	0	0	239	190	340	168	294
ba795a4b38811cff92c4ad57bbf9d283	bASV472	d__Bacteria; p__Nitrospirota; c__Nitrospiria; o__Nitrospirales; f__Nitrospiraceae; g__Nitrospira	GTAGTCCACGCCCTAAACGATGGACACTAAGTGCCGGCGGGTTACCGCCGGTGCCGCAGCTAACGCATTAAGTGTCCCGCCTGGGGAGTACGGCCGCAAGGTTGAAACTCAAAGGAATTGACGGGGGCCCGCACAAGCGGTGGAGCATGTGGTTCAATTCGACGCAACGCGAAGAACCTTACCCAGGCTGGACAAGCAGGTAGTAAGAACCTGAAAGGGGGATGAGCCCGCAAGGGCATCCTGCTCAGGTGCTGCATGGCTGTCGTCAGCTCGTGCCGTGAGGTGTTGGGTTAAGTCCCGCAACGA	0	0	0	2708	0	503	105	4498	1537	711	907	0	1008	126	542	25	518	5885	203	396	1377	1327	0	0	1615	1168	0	0	0	0	0	0	1242	1665	0	0	0	0	0	0	0	0	0	0	231	524
59744cb18981b27f690012b18a7b4edf	bASV473	d__Bacteria; p__Proteobacteria; c__Alphaproteobacteria; o__Rhizobiales; f__KF-JG30-B3; g__KF-JG30-B3	GTAGTCCACGCCGTAAACGATGGATGCTAGCCGTTGGTAAGCATGCTTATCAGTGGCGCAGCTAACGCATTAAGCATCCCGCCTGGGGAGTACGGCCGCAAGGTTGAAACTCAAAGGAATTGACGGGGGCCCGCACAAGCGGTGGAGCATGTGGTTTAATTCGACGCAACGCGCAGAACCTTACCAGGCCTTGACATCCCGTGCTAAGCCCAGAGATGGGTGGTCCCCGCAAGGGGCGCGGAGACAGGTGCTGCATGGCTGTCGTCAGCTCGTGTCGTGAGATGTTGGGTTAAGTCCCGCAACGAG	0	0	0	349	681	1065	45	467	171	178	34	0	646	103	0	0	232	241	63	82	184	192	1022	75	229	293	230	176	1254	0	102	0	127	31	0	658	176	0	0	0	0	0	0	0	0	0
e0fd94a8b40987667bda2dfbafdf06b5	bASV474	d__Bacteria; p__Actinobacteriota; c__Actinobacteria; o__Frankiales; f__Acidothermaceae; g__Acidothermus	GTAGTCCACGCCGTAAACGTTGGGCGCTAGGTGTGGGGTCCTTCCACGGATTCCGTGCCGCAGCTAACGCATTAAGCGCCCCGCCTGGGGAGTACGGCCGCAAGGCTAAAACTCAAAGGAATTGACGGGGGCCCGCACAAGCGGCGGAGCATGTTGCTTAATTCGACGCAACGCGAAGAACCTTACCAAGGCTTGACATGCAGGGAAAAGCCGTAGAGACACGGTGTCCGTAAGGGTCCTGCACAGGTGGTGCATGGCTGTCGTCAGCTCGTGTCGTGAGATGTTGGGTTAAGTCCCGCAACGAGC	0	0	0	0	1959	269	0	0	0	0	0	0	71	0	0	0	0	0	0	0	0	61	1141	591	0	0	0	0	0	0	110	33	0	0	0	623	0	0	0	0	0	0	0	0	0	0
2aca6108f010f100ed06327ff12e0014	bASV475	d__Bacteria; p__Chloroflexi; c__TK10; o__TK10; f__TK10; g__TK10; s__uncultured_bacterium	GTAGTCCACGCCGTAAACGATGCGGACTAGGTGTCGGGGGTATCGACCCCCTCGGCGCCGCAGCTAACGCATTAAGTCCGCCGCCTGGGGACTACGGCCGCAAGGCTAAAACTCAAAGGAATTGACGGGGGCCCGCACAAGCAGCGGAGCGTGTGGTTTAATTCGATGCAACGCGCAGAACCTTACCTCGACTTGACATGCATGTGGTACCAACCCGAAAGGGAAGGGACCCGCGAGGGAGCATGCACAGATGCTGCATGGCTGTCGTCAGCTCGTGCCGTGAGGTGTTGGGTTAAGTCCCGCAAC	0	0	37	564	0	579	0	757	350	453	190	0	1681	277	248	0	0	933	204	105	517	211	260	48	335	0	239	117	826	0	34	54	231	258	214	0	0	0	14	44	32	229	259	647	184	404
d152cef9927a2eeb828da74b2d937d9d	bASV476	d__Bacteria; p__Proteobacteria; c__Alphaproteobacteria; o__Rhizobiales; f__Rhizobiaceae; g__Allorhizobium-Neorhizobium-Pararhizobium-Rhizobium	GTAGTCCACGCCGTAAACGATGAATGTTAGCCGTCGGCAAGTTTACTTGTCGGTGGCGCAGCTAACGCATTAAACATTCCGCCTGGGGAGTACGGTCGCAAGATTAAAACTCAAAGGAATTGACGGGGGCCCGCACAAGCGGTGGAGCATGTGGTTTAATTCGAAGCAACGCGCAGAACCTTACCAGCCCTTGACATGCCCGGCTCGCCACAGAGATGTGGTTTTCCCTTCGGGGACCGGGACACAGGTGCTGCATGGCTGTCGTCAGCTCGTGTCGTGAGATGTTGGGTTAAGTCCCGCAACGAG	61	0	252	182	0	25	0	0	0	0	0	36	30	0	0	0	0	0	0	0	0	46	143	30	0	0	0	0	0	0	0	0	0	0	60	0	0	42	0	0	0	0	0	0	52	0
08e16460e3deaed0088c6c44c62fcab6	bASV477	d__Bacteria; p__Proteobacteria; c__Gammaproteobacteria; o__Xanthomonadales; f__Rhodanobacteraceae	GTAGTCCACGCCCTAAACGATGCGAACTGGATGTTGGGTGCAACTTGGCACTCAGTATCGAAGCTAACGCGTTAAGTTCGCCGCCTGGGGAGTACGGTCGCAAGACTGAAACTCAAAGGAATTGACGGGGGCCCGCACAAGCGGTGGAGTATGTGGTTTAATTCGATGCAACGCGAAGAACCTTACCTGGCCTTGACATGTCCGGAATCCTGCAGAGATGCGGGAGTGCCTTCGGGAATCGGAACACAGGTGCTGCATGGCTGTCGTCAGCTCGTGTCGTGAGATGTTGGGTTAAGTCCCGCAACG	0	0	0	39	465	0	0	204	0	0	56	0	125	0	0	0	0	0	87	52	41	0	441	418	0	0	0	0	48	0	48	0	0	0	342	0	1444	332	0	0	0	0	0	0	18	0
61048edd6caddbb2da26d5af8ce39893	bASV478	d__Bacteria; p__NB1-j; c__NB1-j; o__NB1-j; f__NB1-j; g__NB1-j	GTAGTCCACGCCGTAAACGTTGAGTGCTAGGTGTCGCGGGTATTGACCCCTGCGGTGCCGTCGTTAACGCATTTAGCACTCCGCCTGGGGAGTACGGTCGCAAGGCTAAAACTCAAAGGAATTGACGGGGGCCCGCACAAGCGGTGGAGCATGTGGTTTAATTCGAAGCAACGCGCAGAACCTTACCTGGACTTGACATCTACGGAACCTCCTGGAAACAGGAGGGTGCCTTCGGGAGCCGTAAGACAGGTGCTGCATGGCTGTCGTCAGCTCGTGTCGTGAGGTGTTGGGTTAAGTCCCGCAACG	126	39	121	624	292	286	85	600	509	401	189	75	396	134	0	0	145	673	168	192	505	312	0	11	443	363	81	86	298	1069	454	897	191	283	161	0	0	0	184	450	348	100	245	315	272	180
3a2ef633160d7d14cabff4197a0d681f	bASV479	d__Bacteria; p__Proteobacteria; c__Alphaproteobacteria; o__Rhizobiales; f__Rhizobiales_Incertae_Sedis; g__Nordella; s__uncultured_Alphaproteobacteria	GTAGTCCACGCCGTAAACTATGGGTGCTAGCCGTCGGTGAGCTTGCTCATCGGTGGCGCAGCTAACGCTTTAAGCACCCCGCCTGGGGAGTACGGTCGCAAGATTAAAACTCAAAGGAATTGACGGGGGCCCGCACAAGCGGTGGAGCATGTGGTTTAATTCGAAGCAACGCGCAGAACCTTACCAACCCTTGACATCCCGGTCGCGAGGATCAGAGATGAACCTCTTCAGTTCGGCTGGACCGGAGACAGGTGCTGCATGGCTGTCGTCAGCTCGTGTCGTGAGATGTTGGGTTAAGTCCCGCAA	216	77	204	0	0	116	0	51	0	0	299	160	39	71	103	0	0	1160	0	0	0	0	0	10	0	0	0	42	238	717	217	489	264	358	169	82	0	0	239	390	338	133	248	200	680	231
ddf3776a2f31d7bcbb0cf855642e7072	bASV480	d__Bacteria; p__Firmicutes; c__Bacilli; o__Bacillales; f__Bacillaceae; g__Bacillus; s__Bacillus_litoralis	GTAGTCCACGCCGTAAACGATGAGTGCTAAGTGTTAGAGGGTTTCCGCCCTTTAGTGCTGCAGCTAACGCATTAAGCACTCCGCCTGGGGAGTACGGTCGCAAGACTGAAACTCAAAGGAATTGACGGGGGCCCGCACAAGCGGTGGAGCATGTGGTTTAATTCGAAGCAACGCGAAGAACCTTACCAGGTCTTGACATCCCACTGCCCGGTATAGAGATATACCTTTCCCTTCGGGGACAGTGGTGACAGGTGGTGCATGGTTGTCGTCAGCTCGTGTCGTGAGATGTTGGGTTAAGTCCCGCAA	864	332	6252	870	0	110	89	1257	420	93	0	250	141	0	299	0	0	353	0	246	502	3452	0	0	882	1068	0	0	52	0	0	0	117	131	0	0	89	0	21	0	0	147	108	80	236	72
670b8109566aadd4a1662dc171b362b0	bASV481	d__Bacteria; p__Proteobacteria; c__Gammaproteobacteria; o__Burkholderiales; f__Comamonadaceae; g__Ramlibacter; s__Ramlibacter_sp.	GTAGTCCACGCCCTAAACGATGTCAACTGGTTGTTGGTCCTTCACTGGATCAGTAACGAAGCTAACGCGTGAAGTTGACCGCCTGGGGAGTACGGCCGCAAGGTTGAAACTCAAAGGAATTGACGGGGACCCGCACAAGCGGTGGATGATGTGGTTTAATTCGATGCAACGCGAAAAACCTTACCTACCCTTGACATGTCTGGAATTGCGCAGAGATGTGCAAGTGCCCGAAAGGGAGCCAGAACACAGGTGCTGCATGGCTGTCGTCAGCTCGTGTCGTGAGATGTTGGGTTAAGTCCCGCAACG	470	104	241	70	289	90	0	0	44	42	0	122	49	184	598	0	0	0	0	0	0	0	592	89	0	0	167	257	1079	709	221	560	0	0	254	755	90	46	233	491	364	204	175	499	64	47
b5cdf13c0a626bdaeedb724231174d03	bASV482	d__Bacteria; p__Proteobacteria; c__Alphaproteobacteria; o__Rhizobiales; f__Rhizobiaceae	GTAGTCCACGCCGTAAACGATGAATGTTAGCCGTCGGCAAGTTTACTTGTCGGTGGCGCAGCTAACGCATTAAACATTCCGCCTGGGGAGTACGGTCGCAAGATTAAAACTCAAAGGAATTGACGGGGGCCCGCACAAGCGGTGGAGCATGTGGTTTAATTCGAAGCAACGCGCAGAACCTTACCAGCCCTTGACATCCCGATCGCGGTTTACAGAGATGTATTCCTTCAGTTCGGCTGGATCGGAGACAGGTGCTGCATGGCTGTCGTCAGCTCGTGTCGTGAGATGTTGGGTTAAGTCCCGCAA	738	308	642	44	0	253	22	62	45	129	126	244	81	252	263	0	0	348	0	66	144	188	37	0	181	164	0	39	79	0	52	68	144	80	144	0	18	0	15	50	23	33	40	64	809	86
f82a6fda531c1883c237594b8695c459	bASV483	d__Bacteria; p__Acidobacteriota; c__Acidobacteriae; o__Acidobacteriales; f__uncultured; g__uncultured	GTAGTCCTAGCCCTAAACGATGGATGCTTGGTGTGTCGGGTACCCAATCCCGCCGTGCCGAAGCTAACGCGATAAGCATCCCGCCTGGGGAGTACGGTCGCAAGGCTGAAACTCAAAGGAATTGACGGGGGCCCGCACAAGCGGTGGAGCATGTGGTTCAATTCGACGCAACGCGAAGAACCTTACCTGGGCTCGAAGCGCAGTGGACCGGGGTAGAAATATCCCTTTCTCGCAAGAGACTGCTGCGGAGGTGCTGCATGGCTGTCGTCAGCTCGTGTCGTGAGATGTTGGGTTAAGTCCCGCAAC	0	0	0	0	1663	0	0	0	0	0	0	0	0	0	0	0	0	0	0	0	0	0	2010	492	0	0	155	112	0	0	0	0	0	0	0	492	0	0	0	0	0	0	0	0	0	0
305ba72ff7941300a12c87eb432a8413	bASV484	d__Bacteria; p__Proteobacteria; c__Alphaproteobacteria; o__Sphingomonadales; f__Sphingomonadaceae; g__Novosphingobium	GTAGTCCACGCCGTAAACGATGATAACTAGCTGTCCGGGCACTTGGTGCTTGGGTGGCGCAGCTAACGCATTAAGTTATCCGCCTGGGGAGTACGGTCGCAAGATTAAAACTCAAAGGAATTGACGGGGGCCTGCACAAGCGGTGGAGCATGTGGTTTAATTCGAAGCAACGCGCAGAACCTTACCAGCCTTTGACATCCCGCGCTAACCAGAGAGATCTGGGGTTCCCTTCGGGGACGCGGTGACAGGTGCTGCATGGCTGTCGTCAGCTCGTGTCGTGAGATGTTGGGTTAAGTCCCGCAACGA	701	214	662	0	0	262	0	117	0	0	0	127	0	0	356	0	226	43	0	0	0	378	213	0	0	0	64	0	389	0	104	290	0	0	119	0	0	0	163	506	279	213	437	448	0	0
7d9f8b6da994a37b8dc110f43e8fb02a	bASV486	d__Bacteria; p__Actinobacteriota; c__Acidimicrobiia; o__Microtrichales; f__Ilumatobacteraceae; g__CL500-29_marine_group; s__metagenome	GTAGTCCATGCCGTAAACGTTGGGCACTAGGTGTGGGTTCCAACCAACGGAATCCGCGCCGTCGCTAACGCATTAAGTGCCCCGCCTGGGGAGTACGGCCGCAAGGTTAAAACTCAAAGGAATTGACGGGGGCCCGCACAAGCAGCGGAGCGTGTTGCTTAATTCGATGCTACGCGAAGAACCTTACCTGGGCTTGACATGTGGGGAAAAGCACTAGAGATAGTGTGTCCTTCGGGGCCTCACACAGGTGGTGCATGGCTGTCGTCAGCTCGTGTCGTGAGATGTTGGGTTAAGTCCCGCAACGAG	0	0	0	81	1218	372	0	107	0	66	0	0	689	133	0	0	81	652	0	30	0	150	524	45	0	121	337	202	334	0	67	37	151	136	0	220	0	0	0	0	0	27	0	0	0	274
0cb1b1d297ad3c1642e7e6fb46fbaac5	bASV487	d__Bacteria; p__Proteobacteria; c__Gammaproteobacteria; o__Enterobacterales; f__Enterobacteriaceae	GTAGTCCACGCCGGAGCTAACGCGTTAAGTCGACCGCCTGGGGAGTACGGCCTAAACGATGTCGACTTGGAGGTTGTGCCCTTGAGGCGTGGCTTCCGGCAAGGTTAAAACTCAAATGAATTGACGGGGGCCCGCACAAGCGGTGGAGCATGTGGTTTAATTCGATGCAACGCGAAGGAACCGTGAGACAGGTGCTGCATGGCTGTCGTCAGCTCGTGTTGTGAAATGTTGGGTTAAGTCCCGCAACGAGCGCAACCCTTATCCTTTGTTGCCAGCGGTTCGGCCGGGAACTCAAAGGAGACTGCC	252	271	224	0	0	0	0	0	0	0	0	311	90	74	0	0	596	84	0	172	84	100	0	57	92	0	0	0	53	0	0	0	0	0	74	0	75	0	0	0	0	0	0	0	1259	0
01b211ad3a36e3bde64f1dcd375e76da	bASV488	d__Bacteria; p__Actinobacteriota; c__Acidimicrobiia; o__Microtrichales; f__uncultured; g__uncultured	GTAGTCCACGCCGTAAACGTTGGGCACTAGGTGTGGGTCTCAACCAACGGGATCTGTGCCGTAGCTAACGCATTAAGTGCCCCGCCTGGGGAGTACGGCCGCAAGGCTAAAACTCAAAGGAATTGACGGGGGCCCGCACAAGCGGCGGAGCATGTTGCTTAATTCGAGGCAACGCGAAGAACCTTACCTGGGTTTGACATGTAGGGAAAAGCCGTAGAGATACGGTGTCCTTCGGGGCCCTACACAGGTGGTGCATGGCTGTCGTCAGCTCGTGTCGTGAGATGTTGGGTTAAGTCCCGCAACGAG	0	0	0	409	0	398	0	633	227	128	194	0	493	152	111	0	864	280	0	63	234	182	541	188	180	1076	184	0	344	0	0	0	0	0	0	510	26	0	0	0	0	94	115	220	119	166
9dd699bf61ff893b067cd4fc6014dbbc	bASV489	d__Bacteria; p__Proteobacteria; c__Alphaproteobacteria; o__Sphingomonadales; f__Sphingomonadaceae; g__Novosphingobium	GTAGTCCACGCCGTAAACGATGATAACTAGCTGTCCGGGCACTTGGTGCTTGGGTGGCGCAGCTAACGCATTAAGTTATCCGCCTGGGGAGTACGGTCGCAAGATTAAAACTCAAAGGAATTGACGGGGGCCTGCACAAGCGGTGGAGCATGTGGTTTAATTCGAAGCAACGCGCAGAACCTTACCAGCCTTTGACATCCCGCGCTAACCTGAGAGATCAGGGGTTCCCTTCGGGGACGCGGTGACAGGTGCTGCATGGCTGTCGTCAGCTCGTGTCGTGAGATGTTGGGTTAAGTCCCGCAACGA	590	0	634	0	0	272	0	143	0	48	0	165	761	99	196	0	0	81	0	0	51	123	166	78	87	0	150	146	419	0	124	276	59	41	481	0	68	0	0	128	45	144	232	154	91	57
75712e1b250896d440502a0e26f1fb37	bASV490	d__Bacteria; p__Actinobacteriota; c__Acidimicrobiia; o__Microtrichales; f__uncultured; g__uncultured	GTAGTCCACGCCGTAAACGTTGGGCACTAGGTGTGGGTCGTTATCAACGCGATCCGTGCCGTAGCTAACGCATTAAGTGCCCCGCCTGGGGAGTACGGCCGCAAGGCTAAAACTCAAAGGAATTGACGGGGGCCCGCACAAGCGGCGGAGCATGTTGCTTAATTCGAGGCAACGCGAAGAACCTTACCTGGGCTTGACATGTAGGGAAAAGCCGTAGAGATACGGTGTCCTTCGGGGCCCTACACAGGTGGTGCATGGCTGTCGTCAGCTCGTGTCGTGAGATGTTGGGTTAAGTCCCGCAACGAG	161	0	748	252	748	259	0	371	122	316	331	157	422	233	341	0	0	291	0	0	235	325	192	54	272	931	102	0	404	0	0	0	0	0	127	0	0	0	81	63	86	117	81	184	227	172
4cbc68abf32c907ed20c9893fd0e711f	bASV491	d__Bacteria; p__Proteobacteria; c__Gammaproteobacteria; o__Burkholderiales; f__Comamonadaceae	GTAGTCCACGCCCTAAACGATGTCAACTGGTTGTTGGACGGCTTGCTGTTCAGTAACGAAGCTAACGCGTGAAGTTGACCGCCTGGGGAGTACGGCCGCAAGGTTGAAACTCAAAGGAATTGACGGGGACCCGCACAAGCGGTGGATGATGTGGTTTAATTCGATGCAACGCGAAAAACCTTACCTACCCTTGACATGCCAGGAACTTGCCAGAGATGGCTTGGTGCTCGAAAGAGAACCTGGACACAGGTGCTGCATGGCCGTCGTCAGCTCGTGTCGTGAGATGTTGGGTTAAGTCCCGCAACG	0	0	0	103	0	327	0	114	0	132	0	0	627	0	409	0	0	62	0	0	0	92	811	151	0	0	188	205	1875	0	132	129	0	0	0	525	1264	430	0	200	126	71	88	119	181	126
aa5fc792db2cb7e881e78089d3a3daba	bASV492	d__Bacteria; p__Chloroflexi; c__AD3; o__AD3; f__AD3; g__AD3; s__uncultured_bacterium	GTAGTCCACGCCCTAAACGTTGCGAACTAGGTGTTGGTCGGATTGACCCGATCAGTGCCGCAGCTAACGCATTAAGTTCGCCGCCTGGGGACTACGGCCGCAAGGTTAAAACTCAAAGGAATAGGCGGGGGCCCGCACAAGCAGCGGAGCGTGTGGTTTAATTCGAGGCGACGCGAAGAACCTTACCTGGGCTTGACATGTAGAAGAAACGCTGGTGAAAGCCAGCGCCCCTCGCAAGAGGTTTCTACACAGGTGGTGCATGGCTGTCGTCAGCTCGTGCCGTGAGGTGTTGGGTTAAGTCCCGCA	0	0	0	0	588	0	0	0	0	0	0	0	0	0	0	0	0	0	0	0	0	0	164	0	0	0	0	0	0	0	0	0	0	0	0	0	71	85	0	0	0	0	0	0	0	0
12afbfda5f382409dd3cf9b2997019d7	bASV493	d__Bacteria; p__Proteobacteria; c__Gammaproteobacteria; o__Burkholderiales; f__Sutterellaceae; g__uncultured; s__uncultured_bacterium	GTAGTCCACGCCCTAAACGATGTCGACTAGTTGTCGGGAATTCATTTTCTCGGTAACGCAGCTAACGCGTGAAGTCGACCGCCTGGGGAGTACGGTCGCAAGATTAAAACTCAAAGGAATTGACGGGGACCCGCACAAGCGGTGGATGATGTGGATTAATTCGATGCAACGCGAAAAACCTTACCTACCCTTGACATGCCCGGAATCCCGCAGAGATGTGGGAGTGCCCGAAAGGGAGCCGGGGCACAGGTGCTGCATGGCTGTCGTCAGCTCGTGTCGTGAGATGTTGGGTTAAGTCCCGCAACG	0	0	0	0	0	42	73	0	0	0	0	0	27	0	0	0	0	0	31	0	0	0	0	17	37	0	0	0	0	0	0	0	0	0	0	0	19	6	0	0	0	0	0	0	0	0
275b7fdf779c6e8ff9eae79b935356c5	bASV494	d__Bacteria; p__Desulfobacterota; c__uncultured; o__uncultured; f__uncultured; g__uncultured	GTAGTCCACGCTGTAAACGATGAGCACTAGGTGTCGTGGGTATTGACCCCCGCGGTGCCGCAGCTAACGCATTAAGTGCTCCGCCTGGGGACTACGGCCGCAAGGTTAAAACTCAAAGGAATTGACGGGGGCCCGCACAAGCGGTGGAGCATGTGGTTCAATTCGACGCAACGCGAAGAACCTTACCTGGGCTAGACAACGGAGGACAGCTCCAGAGATGGGGTCTTCCCTTCGGGGACCTCCGGTTCAGGTGCTGCATGGCTGTCGTCAGCTCGTGTCGTGAGATGTTGGGTTAAGTCCCGCAAC	0	0	0	394	443	370	147	482	290	249	314	0	669	0	0	0	0	1075	197	209	447	325	195	54	467	1085	0	0	0	0	0	0	279	382	0	0	40	14	0	0	0	0	0	0	247	331
21604058a40f02d761524461a99875d7	bASV495	d__Bacteria; p__Actinobacteriota; c__MB-A2-108; o__MB-A2-108; f__MB-A2-108; g__MB-A2-108; s__uncultured_bacterium	GTAGTCCTAGCCGTAAACGTTGGGTGCTAGGTGTGGGCGGATATCGACCCCGTCCGTGCCGAAGCTAACGCATTAAGCACCCCGCCTGGGGAGTACGGCCGCAAGGCTAAAACTCAAAGGAATTGACGGGGGCCCGCACAAGCGGCGGAGCATGTGGCTTAATTCGAAGCGACGCGAAGAACCTTACCTGGGCTTGACATGCGGGGTGAAACCGTGGAAACACGGCGCTCTTCGGAGCCCGCACAGGTGGTGCATGGCTGTCGTCAGCTCGTGCCGTGAGGTGTTGCCTTAAGTGGCGCAACGAGC	624	0	519	339	0	279	107	379	175	735	335	167	312	629	252	0	588	391	0	179	363	766	110	0	431	1156	100	179	1025	723	212	326	169	210	258	341	0	0	134	91	278	324	568	739	0	244
9e487eca750b3ba4402311504a86de10	bASV496	d__Bacteria; p__Proteobacteria; c__Alphaproteobacteria; o__Rhizobiales; f__Xanthobacteraceae; g__uncultured	GTAGTCCACGCCGTAAACGATGGATGCTAGCCGTTGGCGGGTTTACTCGTCAGTGGCGCAGCTAACGCATTAAGCATCCCGCCTGGGGAGTACGGTCGCAAGATTAAAACTCAAAGGAATTGACGGGGGCCCGCACAAGCGGTGGAGCATGTGGTTCAATTCGAAGCAACGCGCAGAACCTTACCAGCCCTTGACATCCCGGTCGCGGGTACCAGAGATGGAACCTTTCAGTTCGGCTGGACCGGAGACAGGTGCTGCATGGCTGTCGTCAGCTCGTGTCGTGAGATGTTGGGTTAAGTCCCGCAA	261	81	118	73	0	428	170	129	51	165	347	103	0	216	357	0	0	622	187	0	83	181	0	0	65	0	0	0	246	961	262	422	220	153	140	0	0	0	0	136	162	125	277	421	368	231
2eb1d4b5a1584422b99378832137e3c3	bASV497	d__Bacteria; p__Actinobacteriota; c__Thermoleophilia; o__Gaiellales; f__uncultured; g__uncultured	GTAGTCCACGCCGTAAACGATGGGTGCTAGGTGTGGGCGGTGTCGACTCCGTCCGTGCCGAAGCTAACGCATTAAGCACCCCGCCTGGGGAGTACGGCCGCAAGGCTAAAACTCAAAGGAATTGACGGGGGCCCGCACAAGCAGCGGAGCATGTGGTTTAATTCGACGCGACGCGAAGAACCTTACCAGGGCTTGACATGCACTGGAATGTCGTAGAAATACGGCAGCCCTTCGGGGCTAGTGCACAGGTGGTGCATGGCTGTCGTCAGCTCGTGTCGTGAGATGTTGGGTTAAGTCCCGCAACGA	0	0	0	0	0	240	0	154	84	0	0	0	662	395	0	0	0	824	0	119	187	210	207	106	145	0	0	0	208	601	152	171	0	219	0	615	0	51	148	165	287	363	384	410	322	101
0270f3bfffba44de3e4efe6701b03d13	bASV498	d__Bacteria; p__Actinobacteriota; c__Actinobacteria; o__Micrococcales; f__Microbacteriaceae; g__Agromyces	GTAGTCCACGCCGTAAACGTTGGGCGCTAGATGTGGGGACCTTTCCACGGTTTCCGTGTCGTAGCTAACGCATTAAGCGCCCCGCCTGGGGAGTACGGCCGCAAGGCTAAAACTCAAAGGAATTGACGGGGGCCCGCACAAGCGGCGGAGCATGCGGATTAATTCGATGCAACGCGAAGAACCTTACCAAGGCTTGACATGACCGAGAACGCCCTAGAAATAGGGAACTCTTTGGACACTCGGTTACAGGTGGTGCATGGTTGTCGTCAGCTCGTGTCGTGAGATGTTGGGTTAAGTCCCGCAACG	1199	446	1209	0	0	0	0	0	0	0	0	328	0	0	0	0	0	0	0	0	0	0	0	22	0	0	0	0	41	127	34	70	0	0	182	0	0	0	185	387	311	47	162	150	48	0
c23fe7ff4a0d01be927941895d623fcf	bASV499	d__Bacteria	GTAGTCCACGCTGTAAACGATGGGCACTAGGTGTCCGGGGTATTGACCCCCTGGGTGCCGCAGCTAACGCATTAAGTGCCCCGCCTGGGGAGTACGGTCGCAAGATTAAAACTCAAAGGAATTGACGGGGGCCCGCACAAGCGGTGGAGCATGTGGTTCAATTCGACGCAACGCGAAGAACCTTACCTGGGCTAGACAACGGCGGACCGTCCTAGAAATAGGATCTTCCCTTCGGGGACCGCCGGTTCAGGTGCTGCATGGCTGTCGTCAGCTCGTGCCGTGAGGTGTTGGGTTAAGTCCCGCAAC	36	0	0	2687	0	101	0	3881	1554	475	570	0	218	117	384	0	0	379	0	391	1399	404	0	0	1686	0	96	48	667	550	152	307	305	514	199	603	0	0	0	0	0	139	343	519	266	329
093c9a7750b66c303cd05586c05ce970	bASV500	d__Bacteria; p__Firmicutes; c__Bacilli; o__Bacillales; f__Bacillaceae; g__Bacillus	GTAGTCCACGCCGTAAACGATGAGTGCTAAGTGTTAGAGGGTTTCCGCCCTTTAGTGCTGAAGTTAACGCATTAAGCACTCCGCCTGGGGAGTACGGCCGCAAGGCTGAAACTCAAAGGAATTGACGGGGGCCCGCACAAGCGGTGGAGCATGTGGTTTAATTCGAAGCAACGCGAAGAACCTTACCAGGTCTTGACATCCTCTGACAACCCTAGAGATAGGGCTTCCCCTTCGGGGGCAGAGTGACAGGTGGTGCATGGTTGTCGTCAGCTCGTGTCGTGAGATGTTGGGTTAAGTCCCGCAACG	1074	68	2787	0	0	0	0	0	0	0	0	669	303	0	1825	0	0	0	0	74	0	0	121	385	0	0	69	0	195	0	0	0	0	0	0	0	0	0	41	97	70	83	92	104	2569	71
d86ede2e6a33b316c020ef25cc85e2b3	bASV501	d__Bacteria; p__Actinobacteriota; c__Actinobacteria; o__Streptomycetales; f__Streptomycetaceae; g__Streptomyces	GTAGTCCACGCCGTAAACGGTGGGAACTAGGTGTTGGCGACATTCCACGTCGTCGGTGCCGCAGCTAACGCATTAAGTTCCCCGCCTGGGGAGTACGGCCGCAAGGCTAAAACTCAAAGGAATTGACGGGGGCCCGCACAAGCAGCGGAGCATGTGGCTTAATTCGACGCAACGCGAAGAACCTTACCAAGGCTTGACATACACCGGAAACGTCTGGAGACAGGCGCCCCCTTGTGGTCGGTGTACAGGTGGTGCATGGCTGTCGTCAGCTCGTGTCGTGAGATGTTGGGTTAAGTCCCGCAACGA	1977	124	370	190	0	0	0	230	74	361	108	580	124	154	0	0	330	0	0	165	164	164	108	0	164	0	0	0	114	0	65	76	0	0	93	0	141	51	221	604	486	113	115	215	355	0
396fe38e79431c9babba25eb49b9c72e	bASV502	d__Bacteria; p__Myxococcota; c__Polyangia; o__Haliangiales; f__Haliangiaceae; g__Haliangium; s__uncultured_Myxococcales	GTAGTCCACGCCGTAAACGATGAGTGCTAGATGTTTCTGGTATTGACCCCGGAGGCGTCGTAGCTAACGCGTTAAGCACTCCGCCTGGGGAGTACGGCCGCAAGGCTAAAACTCAAAGGAATTGACGGGGGCCCGCACAAGCGGTGGAGCATGTGGTTCAATTCGACGCAACGCGAAGAACCTTACCTGGGTTGGAACCCTCCAGAAGTCCGCAGAGATGTGGATGTGCCCGCAAGGGAATTGGATGTCCAGGTGCTGCATGGCTGTCGTCAGCTCGTGTCGTGAGATGTTGGGTTAAGTCCCGCA	104	0	117	659	0	308	205	596	239	248	169	46	395	113	74	0	504	371	320	174	361	537	272	204	333	0	94	37	232	0	131	105	132	160	15	0	0	0	23	38	86	80	68	120	64	195
f0b5a471dc2b186f554ee894edb93640	bASV503	d__Bacteria; p__Proteobacteria; c__Alphaproteobacteria; o__Rhizobiales; f__Rhizobiaceae; g__Allorhizobium-Neorhizobium-Pararhizobium-Rhizobium	GTAGTCCACGCCGTAAACGATGAATGTTAGCCGTCGGGCAGTATACTGTTCGGTGGCGCAGCTAACGCATTAAACATTCCGCCTGGGGAGTACGGTCGCAAGATTAAAACTCAAAGGAATTGACGGGGGCCCGCACAAGCGGTGGAGCATGTGGTTTAATTCGAAGCAACGCGCAGAACCTTACCAGCCCTTGACATGTCCGGCTACCTGCAGAGATGCAGGGTTCCCTTCGGGGACCGGAACACAGGTGCTGCATGGCTGTCGTCAGCTCGTGTCGTGAGATGTTGGGTTAAGTCCCGCAACGAG	246	190	583	235	0	190	88	329	106	928	0	175	349	428	512	0	0	218	0	62	217	212	135	46	277	0	201	200	2491	0	188	116	0	0	146	0	0	0	0	0	0	220	505	607	0	0
b95009f6ddfcadabf41fc9b74516f820	bASV504	d__Bacteria; p__Actinobacteriota; c__Thermoleophilia; o__Gaiellales; f__uncultured; g__uncultured	GTAGTCCACGCCGTAAACGATGGGTGCTAGGTGTGGGGAGTGTCGACTCTCTCTGTGCCGAAGCTAACGCATTAAGCACCCCGCCTGGGGAGTACGGCCGCAAGGCTAAAACTCAAAGGAATTGACGGGGGCCCGCACAAGCAGCGGAGCATGTGGTTTAATTCGACGCAACGCGAAGAACCTTACCAGGGCTTGACATGCACGGGAATGTCGTAGAAATACGGCAGCCCTTCGGGGCTCGTGCACAGGTGGTGCATGGCTGTCGTCAGCTCGTGTCGTGAGATGTTGGGTTAAGTCCCGCAACGA	0	0	30	320	0	316	235	420	228	112	84	0	631	160	92	0	0	836	194	73	191	267	463	157	183	0	175	81	549	0	58	29	219	186	0	232	0	0	24	44	83	192	289	328	0	200
5d28c718b32f66cd67ece1f99013fb47	bASV506	d__Bacteria; p__Proteobacteria; c__Alphaproteobacteria; o__Rhizobiales; f__Xanthobacteraceae; g__uncultured; s__Bradyrhizobium_sp.	GTAGTCCACGCCGTAAACGATGAATGCTAGCCGTTGGTGGGTTTACCCTTCAGTGGCGCAGCTAACGCTTTAAGCATTCCGCCTGGGGAGTACGGTCGCAAGATTAAAACTCAAAGGAATTGACGGGGGCCCGCACAAGCGGTGGAGCATGTGGTTTAATTCGACGCAACGCGCAGAACCTTACCAGCCCTTGACATGTCCAGGACCGGTCGCAGAGATGTGACCCTCTCTTCGGAGCCTGGAACACAGGTGCTGCATGGCTGTCGTCAGCTCGTGTCGTGAGATGTTGGGTTAAGTCCCGCAACG	621	171	326	244	522	241	73	119	123	184	0	122	252	167	287	0	0	187	139	180	0	85	136	46	0	0	86	96	505	378	144	139	0	154	317	352	116	0	157	615	221	125	202	319	44	65
e65350df69b615980edd5856c413f88e	bASV507	d__Bacteria; p__Acidobacteriota; c__Acidobacteriae; o__Solibacterales; f__Solibacteraceae; g__Candidatus_Solibacter	GTAGTCCACGCCCTAAACGATGCATATTTGGTGTGGGTCATTCAGTTGATCCGTGCCGGAGCTAACGCGTTAAATATGCCGCCTGGGGAGTACAGTCGCAAGGCTGAAACTCAAAGGAATTGACGGGGGCCCGCACAAGCGGTGGAGCATGTGGTTCAATTCGACGCAACGCGAAGAACCTTACCTGGGCTCGAACGGCTGGTCAACGGAGGTGGAAACATCTTTACCCCGCAAGGGGGTCCAGTCGAGGTGCTGCATGGCTGTCGTCAGCTCGTGTCGTGAGATGTTGGGTTAAGTCCCGCAACG	0	0	0	186	1470	435	0	130	118	0	0	0	597	0	0	0	0	0	0	0	0	113	363	261	0	0	93	0	128	0	0	0	0	0	0	0	0	0	0	0	0	0	0	0	0	0
cffce17da805f6702925d7007f1739f0	bASV508	d__Bacteria; p__Actinobacteriota; c__Thermoleophilia; o__Solirubrobacterales; f__Solirubrobacteraceae; g__Conexibacter	GTAGTCCACGCCGTAAACGATGGGCACTAGGTGTGGGGGGTGTCGACTCCCTCCGTGCCGACGCTAACGCATTAAGTGCCCCGCCTGGGGAGTACGGCCGCAAGGCTAAAACTCAAAGGAATTGACGGGGGCCCGCACAAGCAGCGGAGCATGTGGTTTAATTCGACGCAACGCGAAGAACCTTACCTGGGCTTGACATGTTCCTGACCGCCGTGGAAACACGGTTTCCCTTCGGGGCAGGATCACAGGTGGTGCATGGCTGTCGTCAGCTCGTGTCGTGAGATGTTGGGTTAAGTCCCGCAACGA	0	0	0	0	1080	150	0	0	0	0	0	0	0	0	0	0	0	0	0	0	0	168	98	0	0	0	0	0	0	0	77	0	0	0	0	0	78	105	0	0	0	0	0	0	0	0
2b7a26708bd4366a892d8b689ccc8090	bASV509	d__Bacteria; p__Actinobacteriota; c__Actinobacteria; o__Micrococcales; f__Micrococcaceae; g__Pseudarthrobacter	GTAGTCCATGCCGTAAACGTTGGGCACTAGGTGTGGGGGACATTCCACGTTTTCCGCGCCGTAGCTAACGCATTAAGTGCCCCGCCTGGGGAGTACGGCCGCAAGGCTAAAACTCAAAGGAATTGACGGGGGCCCGCACAAGCGGCGGAGCATGCGGATTAATTCGATGCAACGCGAAGAACCTTACCAAGGCTTGACATGAACCGGTAATACCTGGAGACAGGTGCCCCGCTTGCGGTCGGTTTACAGGTGGTGCATGGTTGTCGTCAGCTCGTGTCGTGAGATGTTGGGTTAAGTCCCGCAACG	361	138	395	0	0	0	0	0	0	0	0	312	0	0	0	0	0	0	0	0	0	0	0	134	0	0	0	0	0	0	54	80	0	0	0	0	0	0	49	0	71	56	134	84	0	0
0086636106faf7e8e6c03fb9de6e46c3	bASV510	d__Bacteria; p__Actinobacteriota; c__Thermoleophilia; o__Gaiellales; f__Gaiellaceae; g__Gaiella; s__uncultured_Rubrobacteria	GTAGTCCACGCCGTAAACGATGGGTGCTAGGTGTGGGCGGTGTCGACTCCGTCCGTGCCGTAGCTAACGCATTAAGCACCCCGCCTGGGGAGTACGGCCGCAAGGCTAAAACTCAAAGGAATTGACGGGGACCCGCACAAGCAGCGGAGCATGTTGTTTAATTCGACGCGACGCGAAGAACCTTACCAAGGCTTGACATGCACGGGAATGTCGTAGAAATACGGCAGCCCTTCGGGGCTCGTGCACAGGTGGTGCATGGCTGTCGTCAGCTCGTGTCGTGAGATGTTGGGTTAAGTCCCGCAACGA	0	0	0	180	0	333	534	360	109	95	0	0	2138	200	0	0	398	493	502	0	101	935	32	19	99	0	0	0	0	0	0	0	0	0	0	0	0	0	0	0	0	0	0	0	0	74
3886602b65165d5c0671ff389860507d	bASV511	d__Bacteria; p__Proteobacteria; c__Alphaproteobacteria; o__Caulobacterales; f__Caulobacteraceae; g__Brevundimonas	GTAGTCCACGCCGTAAACGATGATTGCTAGTTGTCGGGATGCATGCATTTCGGTGACGCAGCTAACGCATTAAGCAATCCGCCTGGGGAGTACGGTCGCAAGATTAAAACTCAAAGGAATTGACGGGGGCCCGCACAAGCGGTGGAGCATGTGGTTTAATTCGAAGCAACGCGCAGAACCTTACCACCTTTTGACATGCCTGGACCGCCAGAGAGATCTGGCTTTCCCTTCGGGGACTAGGACACAGGTGCTGCATGGCTGTCGTCAGCTCGTGTCGTGAGATGTTGGGTTAAGTCCCGCAACGAG	99	64	98	44	0	57	142	151	262	31	112	43	213	165	116	0	0	328	53	43	121	182	182	220	85	0	37	73	188	240	0	77	194	89	39	575	53	76	0	0	13	0	35	0	43	0
650afe3d84ee16f906c17c736ff3a351	bASV512	d__Bacteria; p__Proteobacteria; c__Gammaproteobacteria; o__Burkholderiales; f__SC-I-84; g__SC-I-84	GTAGTCCACGCCCTAAACGATGTCAACTGGGTGTTCGGGAAGCGATTCCTGGGTACCGTAGCTAACGCGTGAAGTTGACCGCCTGGGGAGTACGGCCGCAAGGTTAAAACTCAAAGGAATTGACGGGGACCCGCACAAGCGGTGGATGATGTGGATTAATTCGATGCAACGCGAACAACCTTACCTACCCTTGACATGTCCGAGAGCCCGCTGAGAGGTGGGTGTGCCCGAAAGGGAATCGGAACACAGGTGCTGCATGGCTGTCGTCAGCTCGTGTCGTGAGATGTTGGGTTAAGTCCCGCAACG	812	261	383	234	0	679	0	365	150	367	236	279	158	454	256	0	0	878	0	261	174	366	0	0	212	929	0	0	115	0	60	80	180	198	188	0	0	0	0	0	28	29	21	51	141	169
0798340386c3b036a82d70939ec2ff18	bASV513	d__Bacteria; p__Firmicutes; c__Bacilli; o__Bacillales; f__Bacillaceae; g__Bacillus; s__Bacillus_nealsonii	GTAGTCCACGCCGTAAACGATGAGTGCTAAGTGTTAGAGGGTTTCCGCCCTTTAGTGCTGCAGCAAACGCATTAAGCACTCCGCCTGGGGAGTACGGCCGCAAGGCTGAAACTCAAAGGAATTGACGGGGGCCCGCACAAGCGGTGGAGCATGTGGTTTAATTCGAAGCAACGCGAAGAACCTTACCAGGTCTTGACATCTCCTGACAATCCTAGAGATAGGACGTTCCCCTTCGGGGGACAGGATGACAGGTGGTGCATGGTTGTCGTCAGCTCGTGTCGTGAGATGTTGGGTTAAGTCCCGCAA	600	113	1060	0	0	75	0	0	0	48	0	138	30	0	686	0	432	0	0	707	0	0	39	77	0	0	0	0	0	0	0	30	0	0	54	0	0	0	0	0	0	0	0	42	315	0
24a54260e195c1e88c7578d9e8963e5e	bASV514	d__Bacteria; p__Actinobacteriota; c__Acidimicrobiia; o__Microtrichales; f__Ilumatobacteraceae; g__CL500-29_marine_group; s__uncultured_Acidimicrobiaceae	GTAGTCCACGCCGTAAACGTTGGGCACTAGGTGTGGGCTCCAACCAACGGAGTCCGTGCCGTCGCTAACGCATTAAGTGCCCCGCCTGGGGAGTACGGCCGCAAGGCTAAAACTCAAAGGAATTGACGGGGCCCCGCACAAGCAGCGGAGCGTGTTGCTTAATTCGATGCGACGCGAAGAACCTTACCTGGGCTTGACATGCAGGGAAAAGCCGTAGAGATACGGTGTCCTTCGGGGCCTTGCACAGGTGGTGCATGGCTGTCGTCAGCTCGTGTCGTGAGATGTTGGGTTAAGTCCCGCAACGAG	535	96	433	55	427	148	25	127	33	156	55	160	315	184	221	0	0	682	56	36	78	138	520	0	85	0	139	155	774	619	104	149	174	151	189	216	0	0	112	269	293	217	215	436	91	196
b3577ba6058d3a0f61bffdc6c70838ab	bASV515	d__Bacteria; p__Actinobacteriota; c__Thermoleophilia; o__Gaiellales; f__Gaiellaceae; g__Gaiella; s__actinobacterium_WWH12	GTAGTCCACGCCGTAAACGATGGGCGCTAGGTGTGGGAGGTGTCGACTCCTTCCGTGCCGCAGCTAACGCATTAAGCGCCCCGCCTGGGGAGTACGGCCGCAAGGCTAAAACTCAAAGGAATTGACGGGGGCCCGCACAAGCAGCGGAGCATGTGGTTTAATTGGATGCAACGCCAAGAACCTTACCAAGGCATGACATGTTCGGGAAAGCTGGAGAAATTCAGCCCTCCTTCGGGACCCGATCACAGGTGGTGCATGGCTGTCGTCAGCTCGTGTCGTGAGATGTTGGGTTAAGTCCCGCAACGA	114	25	225	919	461	333	101	1639	488	397	146	37	559	434	274	0	612	970	73	181	555	714	125	36	409	600	163	103	353	95	107	113	182	291	41	437	0	0	65	88	106	576	441	760	0	130
0249a956cd1ac1dd4caca7fc14b2ef64	bASV516	d__Bacteria; p__Gemmatimonadota; c__Gemmatimonadetes; o__Gemmatimonadales; f__Gemmatimonadaceae	GTAGTCCACGCCGTAAACGATGGGCACTAGGTGCCTGGGGGAGCGACCCTCCGGGTGCCGGCGCTAACGCATTAAGTGCCCCGCCTGGGGAGTACGGCCGCAAGGCTGAAACTCAAAGGAATTGACGGGGGCCCGCACAAGCGGTGGAGCATGTGGTTTAATTCGACGCAACGCGAAGAACCTTACCTGGGCTTGACATGCACGGGAAACCCTCCAGAAACGGGGGGCCCTCTTCGGAGTCCGTGCACAGGTGCTGCATGGCTGTCGTCAGCTCGTGTCGTGAGATGTTGGGTTAAGTCCCGCAAC	0	0	0	291	494	275	71	301	96	174	180	0	369	192	162	0	0	307	0	76	130	212	1859	157	115	0	370	247	1208	0	183	151	112	98	0	1197	39	0	0	129	73	205	170	276	0	139
70106462c62ec16d8d9fe9f08da09dae	bASV517	d__Bacteria; p__Proteobacteria; c__Alphaproteobacteria; o__Rhizobiales; f__Rhizobiaceae; g__Allorhizobium-Neorhizobium-Pararhizobium-Rhizobium; s__Agrobacterium_larrymoorei	GTAGTCCACGCCGTAAACGATGAATGTTAGCCGTCGGGCAGTATACTGTTCGGTGGCGCAGCTAACGCATTAAACATTCCGCCTGGGGAGTACGGTCGCAAGATTAAAACTCAAAGGAATTGACGGGGGCCCGCACAAGCGGTGGAGCATGTGGTTTAATTCGAAGCAACGCGCAGAACCTTACCAGCTCTTGACATTCGGGGTATGGTCATTGGAGACGATGACCTTCAGTTCGGCTGGCCCTAGAACAGGTGCTGCATGGCTGTCGTCAGCTCGTGTCGTGAGATGTTGGGTTAAGTCCCGCAA	0	0	123	0	0	0	0	0	0	0	0	0	0	155	0	0	0	24	0	0	0	0	68	0	0	0	58	127	177	0	0	0	0	0	84	0	262	0	0	0	0	0	0	0	0	0
ce3fd5038fdac4c9c0d015bc70c7fab3	bASV518	d__Bacteria; p__Bacteroidota; c__Bacteroidia; o__Sphingobacteriales; f__Sphingobacteriaceae; g__Sphingobacterium	GTAGTCCACGCCCTAAACGATGATAACTCGATGTTGGCGATAGACAGCCAGCGTCCCAGCGAAAGCGTTAAGTTATCCACCTGGGGAGTACGCCCGCAAGGGTGAAACTCAAAGGAATTGACGGGGGCCCGCACAAGCGGAGGAGCATGTGGTTTAATTCGATGATACGCGAGGAACCTTACCCGGGCTTGAAAGTTAGTGAAGAGTGCAGAGACGCACTCGTCCTTCGGGACACGAAACTAGGTGCTGCATGGCTGTCGTCAGCTCGTGCCGTGAGGTGTTGGGTTAAGTCCCGCAACGAGCGCA	157	959	55	0	0	0	0	0	34	0	0	59	0	0	159	0	0	0	0	0	0	0	106	43	0	48	10	0	0	0	0	0	0	0	164	0	0	0	0	0	0	0	0	24	0	17
5ede7c81e5d2ce91092375e8353f5129	bASV519	d__Bacteria; p__Firmicutes; c__Bacilli; o__Paenibacillales; f__Paenibacillaceae; g__Paenibacillus	GTAGTCCACGCCGTAAACGATGAGTGCTAGGTGTTAGGGGTTTCGATACCCTTGGTGCCGAAGTTAACACAGTAAGCACTCCGCCTGGGGAGTACGGTCGCAAGACTGAAACTCAAAGGAATTGACGGGGACCCGCACAAGCAGTGGAGTATGTGGTTTAATTCGAAGCAACGCGAAGAACCTTACCAGGTCTTGACATCCAACTAACGAAGCAGAGATGCATCAGGTGCCCTTCGGGGAAAGTTGAGACAGGTGGTGCATGGTTGTCGTCAGCTCGTGTCGTGAGATGTTGGGTTAAGTCCCGCA	128	0	153	169	0	130	60	139	184	170	0	75	82	0	164	0	383	124	112	130	70	261	23	0	127	126	0	0	0	0	0	0	31	0	105	0	57	53	0	0	0	0	0	0	69	44
ea821ff1212486a5ceece8d59f885c63	bASV520	d__Bacteria; p__Actinobacteriota; c__Acidimicrobiia; o__IMCC26256; f__IMCC26256; g__IMCC26256	GTAGTCCACGCCGTAAACGTTGGGCACTAGGTGTGGGACTCTATCGACGGGTTCCGTGCCGTAGCTAACGCATTAAGTGCCCCGCCTGGGGAGTACGGCCGCAAGGCTAAAACTCAAAGGAATTGACGGGGGCCCGCACAAGCGGCGGAGCATGTGGCTTAATTCGATGCAACGCGAAGAACCTTACCTGGGCTGAACTATGCGGGAAAAGCAGTAGAGATACTGTGTCCTTCGGGGTCCGCGATAGGTGGTGCATGGCTGTCGTCAGCTCGTGTCGTGAGATGTTGGGTTAAGTCCCGCAACGAG	582	63	115	121	0	110	63	214	74	187	83	244	317	289	294	0	0	220	0	90	211	204	584	24	170	265	192	186	683	866	143	249	88	111	212	575	0	0	242	524	441	409	505	728	101	134
5cd05f4689ecea39c725e062ecf1d38a	bASV521	d__Bacteria; p__Proteobacteria; c__Gammaproteobacteria; o__PLTA13; f__PLTA13; g__PLTA13; s__uncultured_gamma	GTAGTCCACGCCCTAAACGATGACGACTGGATGTCGGAGGGGTCTGCCTTTCGGTGTCGTAGCTAACGCGTTAAGTCGTCCGCCTGGGGAGTACGGCCGCAAGGTTGAAACTCAAAGGAATTGACGGGGACCCGCACAAGCGGTGGAGCATGTGGTTCAATTCGATGCAACGCGAAGAACCTTACCTGGCCTTGACATCCGCGGAACTGGGCAGAAATGTCCGGGTGCCTTCGGGAATCGCGAGACAGGTGCTGCATGGCTGTCGTCAGCTCGTGTCGTGAGATGTTGGGTTAAGTCCCGCAACGA	0	0	0	203	208	729	87	196	137	231	0	0	533	324	0	0	510	1344	195	91	445	551	204	0	383	0	177	213	460	1107	597	978	287	403	106	582	0	0	0	0	0	0	135	307	72	362
aade186ad9980b72e0d3933f08291cd6	bASV522	d__Bacteria; p__Proteobacteria; c__Alphaproteobacteria; o__Sphingomonadales; f__Sphingomonadaceae; g__Novosphingobium	GTAGTCCACGCCGTAAACGATGATAACTAGCTGTCCGGGCACTTGGTGCTTGGGTGGCGCAGCTAACGCATTAAGTTATCCGCCTGGGGAGTACGGTCGCAAGATTAAAACTCAAAGGAATTGACGGGGGCCTGCACAAGCGGTGGAGCATGTGGTTTAATTCGAAGCAACGCGCAGAACCTTACCAGCGTTTGACATCCCGCGCTAACCAGAGAGATCTGGGGTTCCCTTCGGGGACGCGGTGACAGGTGCTGCATGGCTGTCGTCAGCTCGTGTCGTGAGATGTTGGGTTAAGTCCCGCAACGA	58	0	116	118	0	0	0	169	57	178	254	0	75	247	903	0	0	257	0	106	116	113	0	0	86	744	156	283	596	857	157	617	72	59	104	0	0	0	86	149	96	266	436	535	261	125
1e5a10b87d658d0ee8f1481fb82b3e65	bASV523	d__Bacteria; p__Proteobacteria; c__Gammaproteobacteria; o__Burkholderiales; f__SC-I-84; g__SC-I-84; s__uncultured_beta	GTAGTCCACGCCCTAAACGATGTCGACTGGGTGTCCGGGAAGCGATTTCTGGGTACCGTAGCTAACGCGTGAAGTCGACCGCCTGGGGAGTACGGCCGCAAGGTTAAAACTCAAAGGAATTGACGGGGACCCGCACAAGCGGTGGATGATGTGGATTAATTCGATGCAACGCGAACAACCTTACCTACCCTTGACATGTGCCGAAGCCCGCTGAGAGGTGGGTGTGCCTGAAAGGGAACGGCAACACAGGTGCTGCATGGCTGTCGTCAGCTCGTGTCGTGAGATGTTGGGTTAAGTCCCGCAACG	0	0	0	0	274	493	0	0	0	0	0	0	2616	0	0	0	0	248	0	0	0	0	5038	200	0	0	579	322	1248	323	259	210	0	0	90	1700	77	0	0	0	0	67	51	359	0	161
eb76ad08316c8b996dcae94cb3607a97	bASV524	d__Bacteria; p__Proteobacteria; c__Alphaproteobacteria; o__Rhizobiales; f__Xanthobacteraceae; g__Pseudolabrys	GTAGTCCACGCTGTAAACGATGGATGCTAGCCGTTGGCAGGTTCACCTGTCAGTGGCGCAGCTAACGCTTTAAGCATCCCGCCTGGGGAGTACGGTCGCAAGATTAAAACTCAAAGGAATTGACGGGGGCCCGCACAAGCGGTGGAGCATGTGGTTCAATTCGAAGCAACGCGCAGAACCTTACCAGCCCTTGACATGTCCTCTATGGATTCCAGAGACGGAGTCCTTCACTTCGGGTGGGAGGAACACAGGTGCTGCATGGCTGTCGTCAGCTCGTGTCGTGAGATGTTGGGTTAAGTCCCGCAA	0	0	0	1474	0	388	906	1792	970	240	76	0	1726	209	61	0	1848	5092	1406	423	1029	1666	0	0	780	286	0	0	0	0	0	0	665	877	0	0	0	0	0	0	0	0	0	0	0	125
14217003cdeb27f6285629bd787f7aae	bASV525	d__Bacteria; p__Firmicutes; c__Bacilli; o__Bacillales; f__Bacillaceae; g__Fictibacillus; s__Fictibacillus_barbaricus	GTAGTCCACGCCGTAAACGATGAGTGCTAGGTGTTGGGGGGTTCCACCCTCAGTGCTGACGTTAACACATTAAGCACTCCGCCTGGGGAGTACGACCGCAAGGTTGAAACTCAAAGGAATTGACGGGGGCCCGCACAAGCAGTGGAGCATGTGGTTTAATTCGAAGCAACGCGAAGAACCTTACCAGGTCTTGACATCCTCTGACCATCCTAGAGATAGGACTTTCCCCTTCGGGGGACAGAGTGACAGGTGGTGCATGGTTGTCGTCAGCTCGTGTCGTGAGATGTTGGGTTAAGTCCCGCAACG	0	0	25	1881	0	541	24	1235	1293	361	0	0	742	19	54	0	0	611	21	35	57	20	0	0	70	0	0	0	0	0	0	0	0	47	0	0	0	4	0	0	0	0	23	0	635	417
7f6ae54e6583bca8ecaab602d0687d24	bASV526	d__Bacteria; p__Actinobacteriota; c__Thermoleophilia; o__Solirubrobacterales; f__Solirubrobacteraceae; g__uncultured	GTAGTCCACGCTGTAAACGATGGCAACTAGATGTGGGGGGTGTCGACTCCCCCCGTGTCGAAGCTAACGCATTAAGTTGCCCGCCTGGGGAGTACGGCCGCAAGGCTAAAACTCAAAGGAATTGACGGGGGCCCGCACAAGCAGCGGAGCATGTGGTTTAATTCGACGCGACGCGAAGAACCTTACCTGGGCTTGACATGTGAGTGACCGGTGTGGAAACACACCTTCCCTTCGGGGCACTTTCACAGGTGGTGCATGGCTGTCGTCAGCTCGTGTCGTGAGATGTTGGGTTAAGTCCCGCAACGA	0	0	0	345	0	241	172	208	0	0	67	0	131	0	0	0	0	0	160	247	0	247	238	133	0	0	45	22	27	0	0	0	0	0	0	0	65	0	0	0	0	0	0	0	0	0
75ab3fa6cbfa397a0f5d2e43b61a8c8f	bASV527	d__Bacteria; p__Proteobacteria; c__Gammaproteobacteria; o__Enterobacterales; f__Enterobacteriaceae	GTAGTCCACGCCGGAGCTAACGCGTTAAGTCGACCGCCTGGGGAGTACGGCCTAAACGATGTCGACTTGGAGGTTGTGCCCTTGAGGCGTGGCTTCCGGCAAGGTTAAAACTCAAATGAATTGACGGGGGCCCGCACAAGCGGTGGAGCATGTGGTTTAATTCGATGCAACGCGAAGGAACCGTGAGACAGGTGCTGCATGGCTGTCGTCAGCTCGTGTTGTGAAATGTTGGGTTAAGTCCCGCAACGAGCGCAACCCTTATCCTTTGTTGCCAGCGGTCCGGCCGGGAACTCAAAGGAGACTGCC	209	0	146	49	0	59	110	0	0	0	0	164	0	0	568	0	0	0	0	0	0	0	55	0	0	0	59	65	78	0	0	0	0	0	0	0	0	66	59	0	91	45	0	0	95	0
e03f05cee2c348044ff866a0758f9199	bASV528	d__Bacteria; p__Firmicutes; c__Bacilli; o__Bacillales; f__Bacillaceae; g__Bacillus	GTAGTCCACGCCGTAAACGATGAGTGCTAAGTGTTAGAGGGTTTCCGCCCTTTAGTGCTGCAGCTAACGCATTAAGCACTCCGCCTGGGGAGTACGGTCGCAAGACTGAAACTCAAAGGAATTGACGGGGGCCCGCACAAGCGGTGGAGCATGTGGTTTAATTCGAAGCAACGCGAAGAACCTTACCAGGTCTTGACATCCTTTGCCACTTCTAGAGATAGAAGGTTCCCCTTCGGGGGACAAAGTGACAGGTGGTGCATGGTTGTCGTCAGCTCGTGTCGTGAGATGTTGGGTTAAGTCCCGCAA	616	33	695	0	0	0	0	0	0	0	0	165	0	0	81	0	0	0	0	0	0	0	0	0	0	0	0	0	26	0	0	0	0	0	0	0	0	11	51	62	56	0	30	0	5230	0
d020b1604ec1659c1b7b91434b287831	bASV529	d__Bacteria; p__Proteobacteria; c__Alphaproteobacteria; o__Rhizobiales; f__Xanthobacteraceae; g__Rhodoplanes	GTAGTCCACGCCGTAAACGATGGATGCTAGCCGTTGGCGGGTTTACTCGTCAGTGGCGCAGCTAACGCATTAAGCATCCCGCCTGGGGAGTACGGTCGCAAGATTAAAACTCAAAGGAATTGACGGGGGCCCGCACAAGCGGTGGAGCATGTGGTTCAATTCGAAGCAACGCGCAGAACCTTACCAGCCCTTGACATGTCCCGTATGGACTTCAGAGATGAGGTCCTTCAGTTCGGCTGGCGGGAACACAGGTGCTGCATGGCTGTCGTCAGCTCGTGTCGTGAGATGTTGGGTTAAGTCCCGCAA	48	0	0	0	803	231	61	119	0	150	250	0	175	170	109	0	471	412	87	74	124	295	320	0	117	0	125	85	349	0	39	35	227	133	0	297	404	179	0	0	0	98	51	130	0	0
9e941a70f467e044fbef2eba144fa4c2	bASV530	d__Bacteria; p__Proteobacteria; c__Alphaproteobacteria; o__Sphingomonadales; f__Sphingomonadaceae; g__Sphingomonas	GTAGTCCACGCCGTAAACGATGATGACTAGCTGTCGGGGCTCATGGAGTTTCGGTGGCGCAGCTAACGCGATAAGTCATCCGCCTGGGGAGTACGGCCGCAAGGTTAAAACTCAAAGAAATTGACGGGGGCCTGCACAAGCGGTGGAGCATGTGGTTTAATTCGAAGCAACGCGCAGAACCTTACCAGCGTTTGACATGGTAGGACGGTTTCCAGAGATGGATTCCTTCCCTTACGGGACCTACACACAGGTGCTGCATGGCTGTCGTCAGCTCGTGTCGTGAGATGTTGGGTTAAGTCCCGCAAC	0	0	0	130	0	131	0	225	96	162	0	0	0	0	230	0	0	391	0	0	158	92	0	0	142	0	0	0	540	0	653	537	0	0	341	0	0	0	172	428	280	122	615	470	400	224
7a3f84e1f41c1420ff3eda36d6b6c7ff	bASV531	d__Bacteria; p__Gemmatimonadota; c__Gemmatimonadetes; o__Gemmatimonadales; f__Gemmatimonadaceae	GTAGTCCACGCCGTAAACGATGGGCACTAGATGCTTGGGGGAGCGACCCTCCGAGTGTCGGCGCTAACGCATTAAGTGCCCCGCCTGGGGAGTACGGCCGCAAGGCTGAAACTCAAAGGAATTGACGGGGGCCCGCACAAGCGGTGGAGCATGTGGTTTAATTCGACGCAACGCGAAGAACCTTACCTGGGCTTGACATGCACGGGAAACGCCTCAGAAAGGGGGCGCCCTCTTCGGAGTCCGTGCACAGGTGCTGCATGGCTGTCGTCAGCTCGTGTCGTGAGATGTTGGGTTAAGTCCCGCAAC	40	0	0	20	0	36	0	24	21	81	180	25	314	95	240	0	160	116	0	0	31	35	188	25	36	0	0	49	1218	210	68	123	104	81	32	177	97	20	34	40	66	137	71	186	414	30
a38ef45a32d65a4fdcd3342557b88c53	bASV532	d__Bacteria; p__Proteobacteria; c__Gammaproteobacteria; o__Enterobacterales; f__Enterobacteriaceae	GTAGTCCACGCCGTAAACGATGTCGACTTGGAGGTTGTGCCCTTGAGGCGTGGCTTCCGGAGCTAACGCGTTAAGTCGACCGCCTGGGGAGTACGGCCGCAAGGTTAAAACTCAAATGAATTGACGGGGGCCCGCACAAGCGGTGGAGCATGTGGTTTAATTCGATGCAACGCGAAGAACCTTACCTGGTCTTGACATCCACAGAACTTTCCAGAGATGGATTGGTGCCTTCGGGAACTGTGAGACAGGTGCTGCATGGCTGTCGTCAGCTCGTGTTGTGAAATGTTGGGTTAAGTCCCGCAACGA	0	230	5521	0	0	0	0	0	0	0	0	99	93	0	0	0	0	0	0	0	36	0	122	0	39	0	0	0	34	0	34	34	0	0	0	0	65	85	31	35	47	0	0	0	66	0
f4ef26ac488643ce953a506d09c3c49e	bASV533	d__Bacteria; p__Proteobacteria; c__Gammaproteobacteria; o__Pseudomonadales; f__Moraxellaceae; g__Acinetobacter	GTAGTCCATGCCGTAAACGATGTCTACTAGCCGTTGGGGCCTTTGAGGCTTTAGTGGCGCAGCTAACGCGATAAGTAGACCGCCTGGGGAGTACGGTCGCAAGACTAAAACTCAAATGAATTGACGGGGGCCCGCACAAGCGGTGGAGCATGTGGTTTAATTCGATGCAACGCGAAGAACCTTACCTGGCCTTGACATACTAGAAACTTTCCAGAGATGGATTGGTGCCTTCGGGAATCTAGATACAGGTGCTGCATGGCTGTCGTCAGCTCGTGTCGTGAGATGTTGGGTTAAGTCCCGCAACGA	34	0	0	0	0	0	0	0	0	0	0	38	0	0	24	0	0	0	0	0	0	105	1087	0	0	0	0	0	0	0	0	0	0	0	0	0	0	0	0	40	0	0	84	0	0	35
72095bcbefec5691767ddecf7c864355	bASV534	d__Bacteria; p__Actinobacteriota; c__Actinobacteria; o__Micrococcales; f__Micrococcaceae; g__Arthrobacter; s__Arthrobacter_globiformis	GTAGTCCATGCCGTAAACGTTGGGCACTAGGTGTGGGGGACATTCCACGTTTTCCGCGCCGTAGCTAACGCATTAAGTGCCCCGCCTGGGGAGTACGGCCGCAAGGCTAAAACTCAAAGGAATTGACGGGGGCCCGCACAAGCGGCGGAGCATGCGGATTAATTCGATGCAACGCGAAGAACCTTACCAAGGCTTGACATGGACCGGACCGCCGCAGAAATGTGGTTTCTCCTTTTGGGGCCGGTTCACAGGTGGTGCATGGTTGTCGTCAGCTCGTGTCGTGAGATGTTGGGTTAAGTCCCGCAA	654	257	276	0	0	0	0	0	0	0	0	771	0	0	0	0	0	83	0	0	0	220	0	65	0	0	0	0	0	0	0	105	131	157	0	0	0	0	67	167	72	0	406	142	438	0
ac140763dbb7c24137be2f9bfdf42797	bASV535	d__Bacteria; p__Proteobacteria; c__Gammaproteobacteria; o__Enterobacterales; f__Erwiniaceae; g__Pantoea; s__Pantoea_rwandensis	GTAGTCCACGCCGTAAACGATGTCGACTTGGAGGTTGTTCCCTTGAGGAGTGGCTTCCGGAGCTAACGCGTTAAGTCGACCGCCTGGGGAGTACGGCCGCAAGGTTAAAACTCAAATGAATTGACGGGGGCCCGCACAAGCGGTGGAGCATGTGGTTTAATTCGATGCAACGCGAAGAACCTTACCTACTCTTGACATCCAGCGAATTCGGTAGAGATACCTTAGTGCCTTCGGGAACGCTGAGACAGGTGCTGCATGGCTGTCGTCAGCTCGTGTTGTGAAATGTTGGGTTAAGTCCCGCAACGA	0	0	0	0	0	0	0	90	0	0	0	121	0	0	0	0	1763	34	0	66	56	60	0	0	263	0	0	0	0	0	0	0	0	0	0	0	0	0	0	0	0	0	0	0	0	0
0cbce1d79d9dd54054e04bd6c3800fc8	bASV536	d__Bacteria; p__Proteobacteria; c__Gammaproteobacteria; o__Burkholderiales; f__Burkholderiaceae; g__Burkholderia-Caballeronia-Paraburkholderia	GTAGTCCACGCCCTAAACGATGTCAACTAGTTGTCGGGTCTTCATTGACTTGGTAACGTAGCTAACGCGTGAAGTTGACCGCCTGGGGAGTACGGTCGCAAGATTAAAACTCAAAGGAATTGACGGGGACCCGCACAAGCGGTGGATGATGTGGATTAATTCGATGCAACGCGAAAAACCTTACCTACCCTTGACATGTATGGAACCCTGCTGAGAGGTGGGGGTGCCCGAAAGGGAGCCATAACACAGGTGCTGCATGGCTGTCGTCAGCTCGTGTCGTGAGATGTTGGGTTAAGTCCCGCAACG	0	0	0	0	0	128	48	0	0	0	0	0	0	0	0	0	0	0	45	0	39	0	0	0	38	0	0	0	0	0	0	0	0	0	0	0	729	111	0	0	0	0	0	0	0	0
f8f2f8dd611e29eb1a6111b97ddc153e	bASV537	d__Bacteria; p__Proteobacteria; c__Gammaproteobacteria; o__Burkholderiales; f__Oxalobacteraceae	GTAGTCCACGCCCTAAACGATGTCTACTAGTTGTTGGGTCTTAATTGACTTAGTAACGCAGCTAACGCGTGAAGTAGACCGCCTGGGGAGTACGGTCGCAAGATTAAAACTCAAAGGAATTGACGGGGACCCGCACAAGCGGTGGATGATGTGGATTAATTCGATGCAACGCGAAAAACCTTACCTACCCTTGACATGGCAGGAATCCCGGAGAGATTTGGGAGTGCTCGAAAGAGAACCTGCACACAGGTGCTGCATGGCTGTCGTCAGCTCGTGTCGTGAGATGTTGGGTTAAGTCCCGCAACG	125	0	97	119	0	313	87	182	91	78	0	0	310	278	173	0	0	278	88	118	182	0	29	0	243	488	0	0	0	0	117	37	0	98	121	346	604	81	0	145	0	69	0	0	80	91
ff5067199e42034e45a187b4b9a16745	bASV538	d__Bacteria; p__Proteobacteria; c__Gammaproteobacteria; o__Burkholderiales; f__Burkholderiaceae; g__Burkholderia-Caballeronia-Paraburkholderia	GTAGTCCACGCCCTAAACGATGTCAACTGGTTGTCGGGCCTTCATTGGCTTGGTAACGTAGCTAACGCGTGAAGTTGACCGCCTGGGGAGTACGGTCGCAAGATTAAAACTCAAAGGAATTGACGGGGACCCGCACAAGCGGTGGATGATGTGGATTAATTCGATGCAACGCGAAAAACCTTACCTACCCTTGACATGTATGGAATCCTGCTGAGAGGTGGGAGTGCCCGAAAGGGAGCCATAACACAGGTGCTGCATGGCTGTCGTCAGCTCGTGTCGTGAGATGTTGGGTTAAGTCCCGCAACG	0	0	0	0	0	0	63	0	98	39	0	0	0	0	0	0	0	0	0	0	0	64	0	75	0	0	0	0	0	0	0	0	0	0	0	0	0	0	0	0	0	0	0	0	0	0
cb650535c7375161927926c94d15c2cc	bASV539	d__Bacteria; p__Bacteroidota; c__Bacteroidia; o__Flavobacteriales; f__Weeksellaceae; g__Chryseobacterium	GTAGTCCACGCCGTAAACGATGCTAACTCGTTTTTGGGGCTTCGGCTTCAGAGACTAAGCGAAAGTGATAAGTTAGCCACCTGGGGAGTACGTTCGCAAGAATGAAACTCAAAGGAATTGACGGGGGCCCGCACAAGCGGTGGATTATGTGGTTTAATTCGATGATACGCGAGGAACCTTACCAAGGCTTAAATGGGAATTGATCGGTTTAGAAATAGACCTTCCTTCGGGCAATTTTCAAGGTGCTGCATGGTTGTCGTCAGCTCGTGCCGTGAGGTGTTAGGTTAAGTCCTGCAACGAGCGCAA	0	948	0	0	0	0	0	46	0	223	0	29	23	58	0	0	0	45	0	281	0	0	0	0	0	0	0	0	0	0	0	0	0	73	684	0	30	0	0	0	0	21	0	0	0	0
23551ee8774f719bd8a0d31870632961	bASV540	d__Bacteria; p__Verrucomicrobiota; c__Verrucomicrobiae; o__Pedosphaerales; f__Pedosphaeraceae; g__ADurb.Bin063-1; s__uncultured_bacterium	GTAGTCCTAGCCGTAAACGGTGCATGTTTGCTGTAAAAGGATTCGACCCCTTTTGTGGCGTAGCCAACGCGTTAAACATGCCGCCTGGGAAGTACGGTCGCAAGATTAAAACTCAAAGAAATTGACGGGGGCCTGCACAAGCGGTGGAGTATGTGGCTCAATTCGATGCAACGCGAAGAACCTTACCTGGCCTTGACATGTACGTAGTAGAAGGGTGAAAGCCTGACGAGGTAGCAATACCAGCGTACACAGGTGCTGCATGGCTGTCGTCAGCTCGTGTCGTGAGATGTTGGGTTAAGTCCCGCA	120	54	0	293	0	367	81	303	208	61	150	33	457	178	39	0	0	249	60	41	85	132	314	0	131	0	72	53	259	481	140	473	97	89	111	216	548	164	34	32	0	107	66	139	139	72
0ccbfef9b447b0b3d551bafdff99e32d	bASV542	d__Bacteria; p__Acidobacteriota; c__Acidobacteriae; o__Acidobacteriales; f__uncultured; g__uncultured	GTAGTCCTAGCCCTAAACGATGATTGCTTGGTGTGTCGGGTACCCAATCCCGACGTGCCGCAGCTAACGCGATAAGCAATCCGCCTGGGGAGTACGGTCGCAAGACTGAAACTCAAAGGAATTGACGGGGGCCCGCACAAGCGGTGGAGCATGTGGTTCAATTCGACGCAACGCGAAGAACCTTACCTGGGCTCGAAATGCAGTGGACCGGGGTGGAAACATCCCTTCCCGCAAGGGCTGCTGTATAGGTGCTGCATGGCTGTCGTCAGCTCGTGTCGTGAGATGTTGGGTTAAGTCCCGCAACGA	0	0	0	0	0	81	0	0	0	0	0	0	113	0	0	0	0	0	81	0	0	61	55	47	0	0	0	0	0	0	56	63	0	0	0	0	63	0	0	0	0	0	0	0	0	0
82103077f6bc65b48a4a83a814361256	bASV543	d__Bacteria; p__Proteobacteria; c__Alphaproteobacteria; o__Rhizobiales; f__Rhizobiaceae; g__Shinella	GTAGTCCACGCCGTAAACGATGAATGTTAGCCGTCGGCATGCATGCATGTCGGTGGCGCAGCTAACGCATTAAACATTCCGCCTGGGGAGTACGGTCGCAAGATTAAAACTCAAAGGAATTGACGGGGGCCCGCACAAGCGGTGGAGCATGTGGTTTAATTCGAAGCAACGCGCAGAACCTTACCAGCCCTTGACATGTCGGTCGCGGATTACAGAGATGTTTTCCTTCAGTTAGGCTGGACCGAACACAGGTGCTGCATGGCTGTCGTCAGCTCGTGTCGTGAGATGTTGGGTTAAGTCCCGCAA	111	74	148	64	77	0	0	37	0	47	0	53	12	34	40	0	0	36	0	23	16	0	13	0	0	0	0	0	9	0	0	6	0	0	352	0	0	4	0	0	0	0	0	6	0	0
51bbf0fc0897b248856dde8bcf194ecb	bASV544	d__Bacteria; p__Proteobacteria; c__Alphaproteobacteria; o__Rhizobiales; f__Hyphomicrobiaceae; g__Hyphomicrobium; s__Hyphomicrobium_zavarzinii	GTAGTCCACGCCGTAAACTATGGATGCTAGCCGTCGGCAAGCTTGCTTGTCGGTGGCGCAGCTAACGCTTTAAGCATCCCGCCTGGGGAGTACGGCCGCAAGGTTAAAACTCAAAGGAATTGACGGGGGCCCGCACAAGCGGTGGAGCATGTGGTTTAATTCGACGCAACGCGAAGAACCTTACCAGCTCTTGACATTTACGGACCGTTTCCAGAGATGGATTCATCCTAGCAATAGGCCGTAGGACAGGTGCTGCATGGCTGTCGTCAGCTCGTGTCGTGAGATGTTGGGTTAAGTCCCGCAACG	45	40	101	264	128	136	62	324	172	611	217	43	92	132	247	0	182	811	183	547	479	471	68	0	376	167	21	0	142	0	23	57	173	124	63	0	0	0	0	0	38	135	265	212	155	65
65606f4a52f79e17da3b14bab7332efd	bASV545	d__Bacteria; p__Firmicutes; c__Bacilli; o__Bacillales	GTAGTCCACGCTGTAAACGATGAGTGCTAAGTGTTAGGGGGTTTCCGCCCCTTAGTGCTGCAGCTAACGCATTAAGCACTCCGCCTGGGGAGTACGGTCGCAAGACTGAAACTCAAAGGAATTGACGGGGACCCGCACAAGCGGTGGAGCATGTGGTTTAATTCGAAGCAACGCGAAGAACCTTACCAAGTCTTGACATCCCTCTGACCGGTCTAGAGATAGGCCTTTCCCTTCGGGGACAGAGGTGACAGGTGGTGCATGGTTGTCGTCAGCTCGTGTCGTGAGATGTTGGGTTAAGTCCCGCAA	53	0	51	98	0	145	0	126	49	28	0	0	137	18	0	0	0	28	0	0	0	60	63	0	0	0	0	54	169	0	26	52	0	0	42	0	0	0	0	0	14	48	74	65	47	38
5b6c709209f395e024d1a47425bbe117	bASV546	d__Bacteria; p__Proteobacteria; c__Alphaproteobacteria; o__Rhizobiales; f__Xanthobacteraceae; g__uncultured	GTAGTCCACGCTGTAAACGATGGATGCTAGCCGTTGTCGGGTTTACTCGTCAGTGGCGCAGCTAACGCATTAAGCATCCCGCCTGGGGAGTACGGTCGCAAGATTAAAACTCAAAGGAATTGACGGGGGCCCGCACAAGCGGTGGAGCATGTGGTTCAATTCGAAGCAACGCGCAGAACCTTACCAGCCCTTGACATCCCGGTCGCGGGAACGAGAGATCGATCCCTTCAGTTCGGCTGGACCGGAGACAGGTGCTGCATGGCTGTCGTCAGCTCGTGTCGTGAGATGTTGGGTTAAGTCCCGCAA	0	0	0	0	0	0	0	0	0	0	0	0	0	0	0	0	0	0	0	0	0	0	0	0	0	0	0	0	0	0	0	0	0	0	0	0	0	0	0	0	0	0	0	0	0	0
1a2628e03feafca54db6dd0c14f8f992	bASV547	d__Bacteria; p__Actinobacteriota; c__Actinobacteria; o__Streptomycetales; f__Streptomycetaceae; g__Streptomyces	GTAGTCCACGCCGTAAACGGTGGGAACTAGGTGTTGGCGACATTCCACGTCGTCGGTGCCGCAGCTAACGCATTAAGTTCCCCGCCTGGGGAGTACGGCCGCAAGGCTAAAACTCAAAGGAATTGACGGGGGCCCGCACAAGCAGCGGAGCATGTGGCTTAATTCGACGCAACGCGAAGAACCTTACCAAGGCTTGACATACGCCGGAAAACCCTGGAGACAGGGTCCCCCTTGTGGTCGGTGTACAGGTGGTGCATGGCTGTCGTCAGCTCGTGTCGTGAGATGTTGGGTTAAGTCCCGCAACGA	642	111	177	293	0	244	0	419	151	535	120	132	479	187	170	0	3053	28	0	75	89	365	454	116	121	0	0	0	166	0	158	74	0	0	0	0	111	0	121	307	148	162	110	124	433	105
db88a61f131c90d59a72e76ed0801f30	bASV548	d__Bacteria; p__Actinobacteriota; c__Actinobacteria; o__Streptomycetales; f__Streptomycetaceae; g__Streptomyces	GTAGTCCACGCCGTAAACGGTGGGAACTAGGTGTTGGCGACATTCCACGTCGTCGGTGCCGCAGCTAACGCATTAAGTTCCCCGCCTGGGGAGTACGGCCGCAAGGCTAAAACTCAAAGGAATTGACGGGGGCCCGCACAAGCGGCGGAGCATGTGGCTTAATTCGACGCAACGCGAAGAACCTTACCAAGGCTTGACATACACCGGAAAGCATTAGAGATAGTGCCCCCCTTGTGGTCGGTGTACAGGTGGTGCATGGCTGTCGTCAGCTCGTGTCGTGAGATGTTGGGTTAAGTCCCGCAACGA	183	0	164	152	0	0	90	217	72	0	171	0	133	0	0	0	0	0	0	59	0	0	498	64	0	0	0	0	315	0	58	83	0	0	0	0	830	128	0	137	109	54	0	58	456	0
65fad168b43861213a636904841cc018	bASV549	d__Bacteria; p__Actinobacteriota; c__Actinobacteria; o__Frankiales; f__Acidothermaceae; g__Acidothermus	GTAGTCCACGCCGTAAACGTTGGGCGCTAGGTGTGGGTCCCTTCCACGGGGTCTGTGCCGCAGCTAACGCATTAAGCGCCCCGCCTGGGGAGTACGGCCGCAAGGCTAAAACTCAAAGGAATTGACGGGGGCCCGCACAAGCGGCGGAGCATGTTGCTTAATTCGACGCAACGCGAAGAACCTTACCAAGGTTTGACATGGCCGGAAAACTCATGGAGACATGGGGTCCTTCGGGGCCGGTCACAGGTGGTGCATGGCTGTCGTCAGCTCGTGTCGTGAGATGTTGGGTTAAGTCCCGCAACGAGC	0	0	0	0	589	82	0	0	0	0	0	0	0	88	0	0	0	0	0	96	80	199	146	605	0	0	0	0	0	0	103	0	0	0	0	0	0	0	0	0	0	199	0	0	0	0
f9dad88de4dd8022c231030973a4e35d	bASV550	d__Bacteria; p__Acidobacteriota; c__Subgroup_5; o__Subgroup_5; f__Subgroup_5; g__Subgroup_5; s__uncultured_bacterium	GTAGTCCTAGCCCTAAACTATGGATACTTGCTGTGGGGGGGATTGAAGCCCCTTGTGGCGAAGCTAACGCATTAAGTATCCCGCCTGGGGAGTACGGTCGCAAGGCTGAAACTCAAAGGAATTGACGGGGGCCCGCACAAGCGGTGGAGTATGTGGTTTAATTCGACGCAACGCGAAGAACCTTACCTGGGCTCGAACGGCTAGTGACAGGGGGCGAAAGTCTCTTTTCCCGCAAGGGACATTAGTCGAGGTGCTGCATGGCTGTCGTCAGCTCGTGTCGTGAGATGTTGGGTTAAGTCCCGCAAC	431	173	210	0	0	0	0	45	0	0	0	81	25	0	144	0	0	0	0	0	0	0	0	0	0	0	0	0	0	0	46	206	0	0	244	0	0	0	67	147	106	0	56	133	464	0
98df5faa564bdbf577a9ef0a2c98b866	bASV551	d__Bacteria; p__Acidobacteriota; c__Acidobacteriae; o__Acidobacteriales; f__Acidobacteriaceae_(Subgroup_1); g__Terracidiphilus; s__uncultured_bacterium	GTAGTCCTAGCCCTAAACGATGACTGCTTGGTGTGACGGGTACCCAATCCCGCCGTGCCGTAGCTAACGCGTTAAGCAGTCCGCCTGGGGAGTACGGTCGCAAGGCTGAAACTCAAAGGAATTGACGGGGGCCCGCACAAGCGGTGGAGCATGTGGTTTAATTCGACGCAACGCGAAGAACCTTACCTGGGCTCGAAATGTACAGGAATCCGGTGGAAACATCGGCGTCCCGCAAGGGACCTGTATATAGGTGCTGCATGGCTGTCGTCAGCTCGTGTCGTGAGATGTTGGGTTAAGTCCCGCAAC	0	0	0	0	0	96	0	0	0	0	0	0	0	0	0	0	0	0	0	0	0	0	211	341	0	0	0	0	10	0	22	0	0	0	0	0	1469	464	0	0	0	0	0	0	0	0
ab06b7da2c334bfe5f981af0da5d3d4e	bASV552	d__Bacteria; p__Proteobacteria; c__Gammaproteobacteria; o__Gammaproteobacteria_Incertae_Sedis; f__Unknown_Family; g__Acidibacter	GTAGTCCACGCCATAAACGATGAGAACTAGACGTTGAAGGGGTAAGCCCTCCAGTGTCGTAGCTAACGCGCTAAGTTCTCCGCCTGGGGAGTACGGCCGCAAGGTTGAAACTCAAAGGAATTGACGGGGACCCGCACAAGCGGTGGAGCATGTGGTTTAATTCGATGCAACGCGAAGAACCTTACCTGGTCTTGACATCCTGGGAATCCCGTAGAGATATGGGAGTGCCGCAAGGAACCCAGAGACAGGTGCTGCATGGCTGTCGTCAGCTCGTGTCGTGAGATGTTGGGTTAAGTCCCGCAACGA	0	0	0	223	0	92	0	118	0	0	227	0	0	0	0	0	1030	111	123	106	121	0	265	86	92	0	0	0	0	0	0	0	0	0	0	0	1867	1121	0	0	0	0	0	0	0	0
e6ea1c4b8d97246ea23a8128f5584386	bASV553	d__Bacteria; p__Proteobacteria; c__Alphaproteobacteria; o__Rhizobiales; f__Hyphomicrobiaceae; g__Pedomicrobium	GTAGTCCACGCTGTAAACGATGGATGCTAGCCGTCAGCAAGCATGCTTGTTGGTGGCGCAGCTAACGCATTAAGCATCCCGCCTGGGGAGTACGGCCGCAAGGTTAAAACTCAAAGGAATTGACGGGGGCCCGCACAAGCGGTGGAGCATGTGGTTTAATTCGACGCAACGCGAAGAACCTTACCAACCCTTGACATGCCCGGACGGTTTCCAGAAATGGATTCCTCCTAGCAATAGGTCGGGACACAGGTGCTGCATGGCTGTCGTCAGCTCGTGTCGTGAGATGTTGGGTTAAGTCCCGCAACG	0	0	0	437	0	283	203	483	276	180	167	0	295	0	0	0	0	266	249	143	188	212	248	68	183	0	0	0	0	0	0	0	0	0	0	0	0	0	0	0	0	0	0	0	0	0
67ae3c54bd7d9e8c1c10eb5c69e254a6	bASV554	d__Bacteria; p__Proteobacteria; c__Alphaproteobacteria; o__Sphingomonadales; f__Sphingomonadaceae; g__Sphingomonas	GTAGTCCACGCCGTAAACGATGATGACTAGCTGTCGGGGCGCTTGGCGTTTCGGTGGCGCAGCTAACGCGTTAAGTCATCCGCCTGGGGAGTACGGCCGCAAGGTTAAAACTCAAAGAAATTGACGGGGGCCTGCACAAGCGGTGGAGCATGTGGTTTAATTCGAAGCAACGCGCAGAACCTTACCAGCGTTTGACATGGTAGGACGGTTTCTGGAGACAGATTCCTTCCCTTACGGGACCTACACACAGGTGCTGCATGGCTGTCGTCAGCTCGTGTCGTGAGATGTTGGGTTAAGTCCCGCAAC	127	0	98	0	0	0	0	0	0	0	0	46	0	0	0	0	0	0	0	0	0	0	204	58	0	0	0	0	187	0	89	219	0	0	0	411	56	47	90	234	145	283	399	604	0	0
1847d107b369a9c8a93726483f898bc0	bASV555	d__Bacteria; p__Acidobacteriota; c__Acidobacteriae; o__Acidobacteriales; f__Acidobacteriaceae_(Subgroup_1); g__Occallatibacter	GTAGTCCTAGCCCTAAACGATGACTGCTTGGTGTGACGGGTACCCAATCCCGCCGTGCCGTAGCTAACGCGTTAAGCAGTCCGCCTGGGGAGTACGGTCGCAAGGCTGAAACTCAAAGGAATTGACGGGGGCCCGCACAAGCGGTGGAGCATGTGGTTTAATTCGACGCAACGCGAAGAACCTTACCTGGGCTCGAAATGCTATGGACCGGGGTAGAAATATCCCTTCCCCGCAAGGGGCCGTAGTATAGGTGCTGCATGGCTGTCGTCAGCTCGTGTCGTGAGATGTTGGGTTAAGTCCCGCAAC	0	0	0	0	0	219	0	131	0	0	0	0	66	0	0	0	0	0	0	0	0	92	230	689	0	0	0	0	0	0	167	0	0	0	0	94	101	49	0	0	0	0	0	0	0	0
6b8179106c35af13e494abc0ab301a68	bASV556	d__Bacteria; p__Actinobacteriota; c__Actinobacteria; o__Micrococcales; f__Micrococcaceae; g__Arthrobacter	GTAGTCCATGCCGTAAACGTTGGGCACTAGGTGTGGGGGACATTCCACGTTTTCCGCGCCGTAGCTAACGCATTAAGTGCCCCGCCTGGGGAGTACGGCCGCAAGGCTAAAACTCAAAGGAATTGACGGGGGCCCGCACAAGCGGCGGAGCATGCGGATTAATTCGATGCAACGCGAAGAACCTTACCAAGGCTTGACATGGACCGGACCGCTCTGGAAACAGGGCTTCCCTTCGGGGCTGGTTCACAGGTGGTGCATGGTTGTCGTCAGCTCGTGTCGTGAGATGTTGGGTTAAGTCCCGCAACG	3259	129	1523	38	0	109	0	58	0	0	0	5358	0	61	0	0	0	233	0	0	48	42	258	50	0	0	0	0	31	119	43	58	91	60	0	0	0	0	0	0	26	46	156	125	1824	0
98c83be59dde1c7f6054f47efe8cfb0f	bASV557	d__Bacteria; p__Acidobacteriota; c__Acidobacteriae; o__Acidobacteriales; f__uncultured; g__uncultured; s__uncultured_Acidobacteriaceae	GTAGTCCTAGCCCTAAACGATGGATGCTTGGTGTGATCGGTACCCAATCCGATCGTGCCGTAGCTAACGCGTTAAGCATCCCGCCTGGGGAGTACGGTCGCAAGGCTGAAACTCAAAGGAATTGACGGGGGCCCGCACAAGCGGTGGAGCATGTGGTTCAATTCGACGCAACGCGAAGAACCTTACCTGGGCTCGAAGCACAGTGGACCGGGGTAGAAATATCCCTTTTCGCAAGAACTGCTGTGGAGGTGCTGCATGGCTGTCGTCAGCTCGTGTCGTGAGATGTTGGGTTAAGTCCCGCAACGA	0	0	0	521	970	875	306	375	454	29	0	0	221	0	0	0	0	187	263	497	164	103	48	0	173	339	0	0	0	0	0	0	0	0	0	0	52	0	0	0	0	0	0	0	0	54
52cf41512d8fb72bd7abd14f07ca161d	bASV558	d__Bacteria; p__Firmicutes; c__Bacilli; o__Paenibacillales; f__Paenibacillaceae; g__Paenibacillus	GTAGTCCACGCCGTAAACGATGAATGCTAGGTGTTAGGGGTTTCGATACCCTTGGTGCCGAAGTTAACACATTAAGCATTCCGCCTGGGGAGTACGGTCGCAAGACTGAAACTCAAAGGAATTGACGGGGACCCGCACAAGCAGTGGAGTATGTGGTTTAATTCGAAGCAACGCGAAGAACCTTACCAGGTCTTGACATCCCTCTGACCGGTACAGAGATGTACCTTTCCTTCGGGACAGAGGAGACAGGTGGTGCATGGTTGTCGTCAGCTCGTGTCGTGAGATGTTGGGTTAAGTCCCGCAACG	215	0	181	158	0	99	48	292	119	80	0	74	182	117	0	0	0	170	0	53	156	131	0	72	116	0	38	73	137	0	47	71	59	0	0	0	0	0	0	0	0	0	0	0	28	54
8f22f9fb453b9fdaee345fbc026d48f8	bASV559	d__Bacteria; p__Actinobacteriota; c__Acidimicrobiia; o__IMCC26256; f__IMCC26256; g__IMCC26256	GTAGTCCACGCCGTAAACGTTGGGCACTAGGTGTGGGACTCTATCGACGGGTTCCGTGCCGTAGCTAACGCATTAAGTGCCCCGCCTGGGGAGTACGGCCGCAAGGCTAAAACTCAAAGGAATTGACGGGGGCCCGCACAAGCGGCGGAGCATGTGGCTTAATTCGATGCAACGCGAAGAACCTTACCTGGGCTGAACTATGCAGGAAAAGCCGTAGAGATACGGTGTCCTTCGGGGTCTGCGATAGGTGGTGCATGGCTGTCGTCAGCTCGTGTCGTGAGATGTTGGGTTAAGTCCCGCAACGAG	257	53	155	243	1307	153	0	418	142	150	161	163	357	207	315	0	0	424	0	118	115	92	191	37	127	0	117	0	135	0	34	94	227	315	225	0	0	0	246	542	350	165	165	216	173	145
b548ec295e3d7c94b5033657c2b2fdbe	bASV560	d__Bacteria; p__Actinobacteriota; c__Actinobacteria; o__Micrococcales; f__Cellulomonadaceae; g__Cellulomonas	GTAGTCCATGCCGTAAACGTTGGGCACTAGGTGTGGGGCTCATTCCACGAGTTCCGTGCCGCAGCAAACGCATTAAGTGCCCCGCCTGGGGAGTACGGCCGCAAGGCTAAAACTCAAAGAAATTGACGGGGGCCCGCACAAGCGGCGGAGCATGCGGATTAATTCGATGCAACGCGAAGAACCTTACCAAGGCTTGACATACACCGGAAAAGTGCAGAGATGTGCTCCCCGTAAGGTCGGTGTACAGGTGGTGCATGGTTGTCGTCAGCTCGTGTCGTGAGATGTTGGGTTAAGTCCCGCAACGAG	625	176	364	40	0	77	33	97	21	201	42	117	57	93	310	0	121	84	57	53	63	286	264	103	87	182	174	418	757	286	130	169	29	21	170	280	0	0	182	456	412	216	229	385	48	68
92cedd3bde6d0972826cc9b81502b6d5	bASV561	d__Bacteria; p__Proteobacteria; c__Alphaproteobacteria; o__Rhizobiales; f__Rhizobiales_Incertae_Sedis; g__Bauldia; s__metagenome	GTAGTCCACGCCGTAAACGATGAATGCTAGCCGTCGGGGAGCTTGCTCTTCGGTGGCGCAGCTAACGCTTTAAGCATTCCGCCTGGGGAGTACGATCGCAAGATTAAAACTCAAAGGAATTGACGGGGGCCCGCACAAGCGGTGGAGCATGTGGTTTAATTCGAAGCAACGCGAAGAACCTTACCAGGCCTTGACATCCCGGTCGCGGCCCCTTGAAAGAGGGGCTTTCAGTTCGGCTGGACCGGTGACAGGTGCTGCATGGCTGTCGTCAGCTCGTGTCGTGAGATGTTGGGTTAAGTCCCGCAA	122	31	46	394	604	376	99	393	163	111	223	135	252	280	0	0	0	372	205	127	299	223	192	0	253	288	39	57	188	325	130	269	0	0	51	278	56	27	57	168	122	88	158	244	60	98
6d56d2f02b238e19111edd17acff0d8a	bASV562	d__Bacteria; p__Proteobacteria; c__Alphaproteobacteria; o__Rhizobiales; f__Rhizobiaceae; g__Allorhizobium-Neorhizobium-Pararhizobium-Rhizobium; s__Rhizobium_etli	GTAGTCCACGCCGTAAACGATGAATGTTAGCCGTCGGGCAGTATACTGTTCGGTGGCGCAGCTAACGCATTAAACATTCCGCCTGGGGAGTACGGTCGCAAGATTAAAACTCAAAGGAATTGACGGGGGCCCGCACAAGCGGTGGAGCATGTGGTTTAATTCGAAGCAACGCGCAGAACCTTACCAGCCCTTGACATGCCAAGCTACCTGCAGAGATGCAGGGTTCCCTTCGGGGACTTGGACACAGGTGCTGCATGGCTGTCGTCAGCTCGTGTCGTGAGATGTTGGGTTAAGTCCCGCAACGAG	0	0	58	58	0	54	0	136	30	115	0	0	78	0	140	0	216	118	0	49	77	96	31	14	144	0	39	0	89	0	0	0	83	0	0	0	105	0	0	0	0	0	31	43	293	24
c25cb6505525c288007f8f56ba2bbe70	bASV563	d__Bacteria; p__Chloroflexi; c__TK10; o__TK10; f__TK10; g__TK10; s__uncultured_Chloroflexi	GTAGTCCACGCCGTAAACGATGAGTACTAGGTGTCGGGGGTATCGACCCCCTCGGTGCCGTCGCTAACGCATTAAGTACTCCGCCTGGGGACTACGGCCGCAAGGCTAAAACTCAAAGGAATTGACGGGGGCCCGCACAAGCAGCGGAGCGTGTGGTTTAATTCGATGCAACGCGAAGAACCTTACCTGGGCTTGACATATACGTGGTAGGGATCCGAAAGGTGACCGACCCGCAAGGGAGCGTATACAGGTGCTGCATGGCTGTCGTCAGCTCGTGCCGTGAGGTGTTGGGTTAAGTCCCGCAAC	137	0	32	121	91	76	0	157	41	169	175	0	207	150	412	0	0	180	0	28	198	130	563	0	110	0	83	0	444	719	160	319	51	84	97	174	27	0	0	97	0	138	206	539	36	121
3d029cff34fb63e1f869132e7ce85552	bASV564	d__Bacteria; p__Actinobacteriota; c__Thermoleophilia; o__Gaiellales; f__Gaiellaceae; g__Gaiella; s__uncultured_bacterium	GTAGTCCACGCCGTAAACGATGGGTGCTAGGTGTGGGAGGTGTCGACTCCTTCCGTGCCGCAGCTAACGCATTAAGCACCCCGCCTGGGGAGTACGGCCGCAAGGCTAAAACTCAAAGGAATTGACGGGGCCCCGCACAAGCAGCGGAGCATGTTGTTTAATTCGATGCAACGCGAAGAACCTTACCAGGGCTTGACATGCACTGGAAAACCGTAGAAATACGGTCCTCCTTCGGGACTAGTGCACAGGTGGTGCATGGCTGTCGTCAGCTCGTGTCGTGAGATGTTGGGTTAAGTCCCGCAACGA	78	0	1319	981	0	591	0	1477	506	45	132	91	109	256	1729	0	0	3115	0	185	287	0	0	0	220	0	0	0	118	0	0	66	1060	1347	300	0	0	0	105	251	212	0	129	117	791	749
424c17826c46eeb16945fc388f728f6b	bASV565	d__Bacteria; p__Proteobacteria; c__Alphaproteobacteria; o__Rhodobacterales; f__Rhodobacteraceae; g__Amaricoccus	GTAGTCCACGCCGTAAACTATGAGAGCTAGACGTCGGGCGGCTTGCCGTTCGGTGTCGCAGCTAACGCATTAAGCTCTCCGCCTGGGGAGTACGGCCGCAAGGTTAAAACTCAAAGGAATTGACGGGGGCCCGCACAAGCGGTGGAGCATGTGGTTTAATTCGAAGCAACGCGCAGAACCTTACCATCCCTTGACTTGGACGTCGCGGGCCGGGAGACCGGTCTTTCAGTTCGGCTGGACGTCACACAGGTGCTGCATGGCTGTCGTCAGCTCGTGTCGTGAGATGTTGGGTTAAGTCCCGCAACG	416	109	226	148	0	207	59	186	66	357	340	215	55	493	246	0	0	264	58	190	251	410	168	0	264	911	117	102	217	298	66	105	133	174	206	0	10	13	181	551	364	96	141	208	100	144
e4328fdf38a3317d03adadcf7e68fa54	bASV566	d__Bacteria; p__Proteobacteria; c__Alphaproteobacteria; o__Rhizobiales; f__Rhizobiaceae; g__Mesorhizobium	GTAGTCCACGCCGTAAACGATGGAAGCTAGCCGTTGGCAAGTTTACTTGTCGGTGGCGCAGCTAACGCATTAAGCTTCCCGCCTGGGGAGTACGGTCGCAAGATTAAAACTCAAAGGAATTGACGGGGGCCCGCACAAGCGGTGGAGCATGTGGTTTAATTCGAAGCAACGCGCAGAACCTTACCAGCCCTTGACATCCCGGTCGCGGTTTCCAGAAATGGATTCCTTCAGTTCGGCTGGACCGGTGACAGGTGCTGCATGGCTGTCGTCAGCTCGTGTCGTGAGATGTTGGGTTAAGTCCCGCAA	701	0	1514	154	0	159	0	293	0	404	0	1094	83	364	0	0	1828	155	108	0	103	179	0	0	0	0	155	113	248	0	0	0	0	0	549	0	0	0	0	0	0	64	0	38	52	116
720de670776bd8180f6521ae00dd721e	bASV567	d__Bacteria; p__Chloroflexi; c__Dehalococcoidia; o__S085; f__S085; g__S085; s__uncultured_bacterium	GTAGTCCACGCCCTAAACGGTGGATGCTAGGTGTGGGGGGTGTCGACCCCCTCCGTGCCGCAGCTAACGCTTTAAGCATCCCGCCTGGGGAGTACGGCCGCAAGGCTAAAACTCAAAGGAATTGACGGGGGCCCGCACAAGCGGCGGAGCGTGTGGTTTAATTCGATGCAACGCGAAGAACCTTACCAAGGCTTGACATGCTAGTGGTACGGATCAGAAACGTGAAGGACCCTTCGGGGAGCTAGCACAGGTGCTGCATGGCTGTCGTCAGCTCGTGCCGTGAGGTGTTGGGTTAAGTCCCGCAAC	170	0	105	241	0	493	43	332	227	126	427	71	477	83	0	0	0	945	130	40	502	76	11	6	279	0	0	0	0	267	67	152	130	219	69	0	0	0	0	90	52	59	255	272	107	541
77bade0f2efcf2d3d85c83f936558af2	bASV568	d__Bacteria; p__Bacteroidota; c__Bacteroidia; o__Flavobacteriales; f__Flavobacteriaceae; g__Flavobacterium	GTAGTCCACGCCGTAAACGATGGATACTAGCTGTTCGGAGCAATCTGAGTGGCTAAGCGAAAGTGATAAGTATCCCACCTGGGGAGTACGTTCGCAAGAATGAAACTCAAAGGAATTGACGGGGGCCCGCACAAGCGGTGGAGCATGTGGTTTAATTCGATGATACGCGAGGAACCTTACCAAGGCTTAAATGTAGATTGACAGGACTGGAAACAGTTTTTTCTTCGGACAATTTACAAGGTGCTGCATGGTTGTCGTCAGCTCGTGCCGTGAGGTGTCAGGTTAAGTCCTATAACGAGCGCAACC	0	106	0	0	0	0	102	759	0	443	180	0	0	0	0	0	0	933	91	186	221	0	0	0	459	0	0	0	0	0	0	0	288	0	0	0	0	0	0	99	107	0	0	0	0	0
e301e80410d00ef93719ad48fd077db6	bASV569	d__Bacteria; p__Bacteroidota; c__Bacteroidia; o__Cytophagales; f__Microscillaceae	GTAGTCCACACTGTAAACGTTGATGACTCGCTGTTGGCGATACACGGCCAGCGGCAGAGAGAAATCGTTAAGTCATCCACCTGGGGAGTACGCCGGCAACGGTGAAACTCAAAGGAATTGACGGGGGTCCGCACAAGCGGTGGAGCATGTGGTTTAATTCGATGATACGCGAGGAACCTTACCTGGGCTAGAATGCCCTTGATGGGTCCAGAGATGGACTGTTCCGCAAGGACAAGGAGCAAGGTGCTGCATGGCTGTCGTCAGCTCGTGCCGTGAGGTGTTGGGTTAAGTCCCGCAACGAGCGCA	313	130	48	0	0	0	0	0	0	0	0	95	0	48	252	0	0	0	0	0	51	0	132	0	55	0	85	58	570	674	181	287	0	0	349	325	11	0	79	382	196	51	71	85	0	0
f55e358a44d2cebfa9e6a49eddf79d0d	bASV570	d__Bacteria; p__Actinobacteriota; c__Actinobacteria; o__Frankiales; f__Frankiaceae; g__Jatrophihabitans; s__uncultured_bacterium	GTAGTCCACGCCGTAAACGTTGGGCGCTAGGTGTGGGCCACATTCCACGTGGTCTGTGCCGCAGCTAACGCATTAAGCGCCCCGCCTGGGGAGTACGGCCGCAAGGCTAAAACTCAAAGGAATTGACGGGGGCCCGCACAAGCGGCGGAGCATGCGGCTTAATTCGATGCAACGCGAAGAACCTTACCTGGGTTTGACATGTAGGGAAATCTCGTAGAGATACGAGGTCCGTAAGGGCCTTGCACAGGTGGTGCATGGCTGTCGTCAGCTCGTGTCGTGAGATGTTGGGTTAAGTCCCGCAACGAG	0	0	0	473	1194	219	170	649	230	116	138	0	142	176	0	0	657	456	185	111	77	322	265	20	183	179	0	0	0	0	0	0	113	119	38	219	0	0	0	0	0	0	19	0	32	83
1b8f5636996286fb95fec955a4311a9f	bASV571	d__Bacteria; p__Proteobacteria; c__Alphaproteobacteria; o__Micropepsales; f__Micropepsaceae; g__uncultured	GTAGTCCACGCCGTAAACGATGAATGCTAGCCGTTGGGCAGCTTGCTGTTCAGTGGCGCAGCTAACGCATTAAGCATTCCGCCTGGGGAGTACGGCCGCAAGGTTGAAACTCAAAGGAATTGACGGGGGCCCGCACAAGCGGTGGAGCATGTGGTTTAATTCGACGCAACGCGCAGAACCTTACCAGGGTTTGACATCCTGCGACCGCTCCCTAATAGGAGTTTTCCCGCAAGGGACGCAGAGACAGGTGCTGCATGGCTGTCGTCAGCTCGTGTCGTGAGATGTTGGGTTAAGTCCCGCAACGAG	0	0	0	115	0	174	0	83	52	152	0	0	361	69	0	0	319	163	0	44	88	79	227	52	128	0	30	0	146	0	0	18	0	0	0	0	1078	175	0	0	0	135	95	217	0	0
1688bc5c44857cc4f5845b1719f91399	bASV572	d__Bacteria; p__Proteobacteria; c__Alphaproteobacteria; o__Rhizobiales; f__Xanthobacteraceae; g__uncultured	GTAGTCCACGCCGTAAACGATGGGGGCTAGCCGTTGGACAGCTTGCTGTTCAGTGGCGCAGCTAACGCATTAAGCCCCCCGCCTGGGGAGTACGGTCGCAAGATTAAAACTCAAAGGAATTGACGGGGGCCCGCACAAGCGGTGGAGCATGTGGTTCAATTCGAAGCAACGCGCAGAACCTTACCAGCCCTTGACATCCCGGTCGCGGGAACGAGAGATCGATCCCTTCAGTTCGGCTGGACCGGAGACAGGTGCTGCATGGCTGTCGTCAGCTCGTGTCGTGAGATGTTGGGTTAAGTCCCGCAA	62	0	60	387	1421	237	49	535	191	232	103	21	91	54	59	0	489	542	102	30	298	268	226	0	136	263	23	30	166	473	57	133	123	122	342	269	0	0	40	140	70	20	123	105	208	129
9c970f7d1f1a544d8a1a0a380079f7f1	bASV573	d__Bacteria; p__Proteobacteria; c__Gammaproteobacteria; o__Burkholderiales; f__Nitrosomonadaceae; g__Ellin6067	GTAGTCCACGCCCTAAACGATGTCGACTGGTTGTTGGGGGTTTGACACTCTCAGTAACGAAGCTAACGCGTGAAGTCGACCGCCTGGGGAGTACGGCCGCAAGGTTAAAACTCAAAGGAATTGACGGGGACCCGCACAAGCGGTGGATTATGTGGATTAATTCGATGCAACGCGAAAAACCTTACCTACCCTTGACATGTCCGAGAGCTCGCTGAGAGGCGGGTGTGCCCGAAAGGGAATCGGAACACAGGTGCTGCATGGCTGTCGTCAGCTCGTGTCGTGAGATGTTGGGTTAAGTCCCGCAAC	99	0	172	94	676	251	0	67	67	116	0	0	240	264	348	0	0	132	0	141	0	0	964	302	118	0	119	150	141	0	0	82	0	0	0	0	656	64	0	0	0	0	0	0	87	75
c39348a9d6a255621b0cf97d0d11a123	bASV574	d__Bacteria; p__Actinobacteriota; c__Actinobacteria; o__Frankiales; f__Sporichthyaceae; g__uncultured; s__uncultured_bacterium	GTAGTCCACGCCGTAAACGTTGGGCGCTAGGTGTGGGGAACCTTCCACGTTCTCCGTGCCGCAGCTAACGCATTAAGCGCCCCGCCTGGGGAGTACGGCCGCAAGGCTAAAACTCAAAGGAATTGACGGGGGCCCGCACAAGCGGCGGAGCATGTGGCTTAATTCGACGCAACGCGAAGAACCTTACCAAGGCTTGACATATACCGAAAACTCGTAGAGATACGGGGTCCGCAAGGGCGGTATACAGGTGGTGCATGGTTGTCGTCAGCTCGTGTCGTGAGATGTTGGGTTAAGTCCCGCAACGAG	511	86	255	0	0	0	0	0	0	0	46	81	0	0	125	0	0	11	0	0	0	0	52	34	0	0	38	29	157	380	78	171	0	24	216	339	0	0	380	855	1043	160	289	373	42	25
1b5e7f761aaa23c3b1398060ee0fabf8	bASV575	d__Bacteria; p__Proteobacteria; c__Gammaproteobacteria; o__Xanthomonadales; f__Xanthomonadaceae; g__Arenimonas	GTAGTCCACGCCCTAAACGATGCGAACTGGACGTTGGGAGCAATCAGGCTCTCAGTGTCGAAGCTAACGCGTTAAGTTCGCCGCCTGGGGAGTACGGTCGCAAGACTGAAACTCAAAGGAATTGACGGGGGCCCGCACAAGCGGTGGAGTATGTGGTTTAATTCGATGCAACGCGCAGAACCTTACCTGGCCTTGACATCCACGGAACTGCCCAGAGATGGGCGGGTGCCTTCGGGAACCGTGAGACAGGTGCTGCATGGCTGTCGTCAGCTCGTGTCGTGAGATGTTGGGTTAAGTCCCGCAACG	793	114	231	0	135	53	0	69	36	65	0	156	72	237	465	0	0	384	0	41	32	50	281	29	57	0	133	107	582	446	139	218	112	93	366	483	59	0	279	813	351	286	164	531	70	316
62166c6dad2cd90c1ac3505241d9aead	bASV576	d__Bacteria; p__Proteobacteria; c__Gammaproteobacteria; o__Steroidobacterales; f__Steroidobacteraceae; g__uncultured	GTAGTCCACGCCCTAAACGATGACAACTGGATGTCGGGAGGGTTTGCCTTCCGGTGTCGTAGCTAACGCGTTAAGTTGTCCGCCTGGGAAGTACGGCCGCAAGGTTGAAACTCAAAGGAATTGACGGGGACCCGCACAAGCGGTGGAGCATGTGGTTTAATTCGATGCAACGCGAAGAACCTTACCTGGTCTTGACATCCTAGGAATCCTGCAGAGATGCGGGAGTGCCTTCGGGAACCTGGAGACAGGTGCTGCATGGCTGTCGTCAGCTCGTGTCGTGAGATGTTGGGTTAAGTCCCGCAACGA	1090	476	1139	38	0	145	0	75	0	81	27	236	55	171	214	0	0	0	0	0	0	0	328	0	30	0	206	469	741	412	175	255	0	0	201	296	0	0	242	967	419	93	179	321	51	97
04f501d4c491710be4d7d0ba850dce19	bASV577	d__Bacteria; p__Proteobacteria; c__Gammaproteobacteria; o__Burkholderiales; f__SC-I-84; g__SC-I-84	GTAGTCCACGCCCTAAACGATGGCAACTGGGTGTTGGGGAAGCGATTCCTTGGTACCGTAGCTAACGCGTGAAGTTGCCCGCCTGGGGAGTACGGCCGCAAGGTTAAAACTCAAAGGAATTGACGGGGACCCGCACAAGCGGTGGATGATGTGGATTAATTCGATGCAACGCGAACAACCTTACCTACCCTTGACATGTCCGGAACCCTGCTGAGAGGTGGGGGTGCCCGAAAGGGAATCGGAACACAGGTGCTGCATGGCTGTCGTCAGCTCGTGTCGTGAGATGTTGGGTTAAGTCCCGCAACG	55	55	36	0	664	189	0	73	0	127	222	36	173	352	259	54	0	450	0	141	148	195	0	0	137	0	0	0	167	0	0	144	176	0	128	0	66	0	0	0	0	12	0	77	173	72
556ef087a43fc8532bae07712c5d3302	bASV578	d__Bacteria; p__Proteobacteria; c__Alphaproteobacteria; o__Rhizobiales; f__Xanthobacteraceae; g__uncultured; s__uncultured_Methylocystaceae	GTAGTCCACGCCGTAAACGATGGAAGCTAGCCGTTGGTGGGTTTACTCATCAGTGGCGCAGCTAACGCATTAAGCTTCCCGCCTGGGGAGTACGGTCGCAAGATTAAAACTCAAAGGAATTGACGGGGGCCCGCACAAGCGGTGGAGCATGTGGTTCAATTCGAAGCAACGCGAAGAACCTTACCAACCTTTGACATGCCTCGTATGGTCGCTGGAGACAGCTTCCTTCCCGCAAGGGGCGAGAGCACAGGTGCTGCATGGCTGTCGTCAGCTCGTGTCGTGAGATGTTGGGTTAAGTCCCGCAAC	0	0	0	741	857	1667	190	752	488	111	0	0	749	156	0	0	1203	701	204	70	258	454	0	0	335	0	0	0	0	0	0	0	140	0	0	0	0	0	0	0	0	0	0	0	0	0
4677b2079cfe5bbf93b41c2d0ad9444c	bASV579	d__Bacteria; p__Actinobacteriota; c__Actinobacteria; o__Corynebacteriales; f__Mycobacteriaceae; g__Mycobacterium	GTAGTCCACGCCGTAAACGGTGGGTACTAGGTGTGGGTTTCCTTCCTTGGGATCCGTGCCGTAGCTAACGCATTAAGTACCCCGCCTGGGGAGTACGGCCGCAAGGCTAAAACTCAAAGAAATTGACGGGGGCCCGCACAAGCGGCGGAGCATGTGGATTAATTCGATGCAACGCGAAGAACCTTACCTGGGTTTGACATGCACAGGACGCCAGTAGAGATATTGGTTCCCTTGTGGCCTGTGTGCAGGTGGTGCATGGCTGTCGTCAGCTCGTGTCGTGAGATGTTGGGTTAAGTCCCGCAACGA	379	0	0	204	1514	191	77	382	195	103	0	51	236	153	0	0	19285	228	100	165	185	100	0	25	146	690	31	0	133	0	0	67	89	0	0	0	169	0	0	88	0	82	47	90	0	25
def6c378e24268c937430e4d02d6891d	bASV580	d__Bacteria; p__Proteobacteria; c__Alphaproteobacteria; o__Rhizobiales; f__Rhizobiaceae	GTAGTCCACGCCGTAAACGATGGAAGCTAGCCGTTGGCAGGTTTACCTGTCGGTGGCGCAGCTAACGCATTAAGCTTCCCGCCTGGGGAGTACGGTCGCAAGATTAAAACTCAAAGGAATTGACGGGGGCCCGCACAAGCGGTGGAGCATGTGGTTTAATTCGAAGCAACGCGCAGAACCTTACCAGCCCTTGACATCCCGGTCGCGGTTTCCAGAGATGGATTCCTTCAGTTCGGCTGGACCGGTGACAGGTGCTGCATGGCTGTCGTCAGCTCGTGTCGTGAGATGTTGGGTTAAGTCCCGCAA	794	365	455	0	0	165	0	101	0	302	257	247	0	218	272	0	0	128	0	0	0	177	0	0	0	0	0	0	154	851	83	135	0	0	183	0	0	0	164	602	294	86	130	182	182	121
f56bdb82c494e782adea99854fcc9b0e	bASV582	d__Bacteria; p__Actinobacteriota; c__Thermoleophilia; o__Gaiellales; f__uncultured; g__uncultured	GTAGTCCACGCCGTAAACGATGGGCGCTAGGTGTGGGGGGTGTCGACTCCCTCCGTGCCGAAGCTAACGCATTAAGCGCCCCGCCTGGGGAGTACGGCCGCAAGGCTAAAACTCAAAGGAATTGACGGGGACCCGCACAAGCAGCGGAGCATGTGGTTTAATTCGACGCAACGCGAAGAACCTTACCTAGGCTTGACATGCACAGGAATGTCGTGGAAACACGGCAGCCCTTCGGGGCCTGTGCACAGGTGGTGCATGGCTGTCGTCAGCTCGTGTCGTGAGATGTTGGGTTAAGTCCCGCAACGA	720	129	397	153	0	66	0	188	62	135	136	175	48	0	274	0	0	184	0	38	113	70	80	0	127	0	79	116	258	168	82	101	49	88	503	0	0	0	656	1289	1879	136	319	452	159	0
728f82fc3aa95edd895721d01d2d08b1	bASV583	d__Bacteria; p__Bacteroidota; c__Bacteroidia; o__Flavobacteriales; f__Weeksellaceae; g__Chryseobacterium	GTAGTCCACGCCGTAAACGATGCTAACTCGTTTTTGGGTTTTCGGATTCAGAGACTAAGCGAAAGTGATAAGTTAGCCACCTGGGGAGTACGTTCGCAAGAATGAAACTCAAAGGAATTGACGGGGGCCCGCACAAGCGGTGGATTATGTGGTTTAATTCGATGATACGCGAGGAACCTTACCAAGGCTTAAATGGGAATTGACAGGTTTAGAAATAGACTTTTCTTCGGACAATTTTCAAGGTGCTGCATGGTTGTCGTCAGCTCGTGCCGTGAGGTGTTAGGTTAAGTCCTGCAACGAGCGCAA	0	579	0	0	0	0	0	0	71	0	0	0	0	125	0	0	0	0	0	82	0	0	83	70	0	0	179	0	230	0	0	0	0	0	199	0	0	0	0	0	0	0	0	0	44	0
d6933e6ec862d5c9a0c768b7b60fd6c3	bASV584	d__Bacteria; p__Myxococcota; c__bacteriap25; o__bacteriap25; f__bacteriap25; g__bacteriap25; s__uncultured_Syntrophobacterales	GTAGTCCACGCCGTAAACGATGGGCACTAGGTGTCGGGGGTATCCACTCCCTCGGTGCCGCCGCTAACGCATTAAGTGTCCCGCCTGGGAAGTACGGTCGCAAGATTAAAACTCAAAGGAATTGACGGGGGCCCGCACAAGCGGTGGAGCATGTGGTTCAATTCGATGCAACGCGAAGAACCTTACCTGGGTTTGACATCTGGCGAATCCCGGTGAAAGCCGGGAGTGCCCGCAAGGGAGCGCCAAGACAGGTGCTGCATGGCTGTCGTCAGCTCGTGCCGTGAGGTGTTAGGTTAAGTCCTGCAA	274	48	81	238	0	95	0	397	142	447	372	97	0	0	178	0	0	185	0	84	270	352	165	24	435	0	70	109	321	273	120	142	116	244	114	0	0	0	92	305	174	149	299	504	122	76
b58b1ee2e77b881ee684e84b95406226	bASV585	d__Bacteria; p__Proteobacteria; c__Gammaproteobacteria; o__Burkholderiales; f__Rhodocyclaceae; g__Azovibrio; s__uncultured_bacterium	GTAGTCCACGCCCTAAACGATGTCGACTAGGTGTTCGGGGAGGAGACTCCTTGAGTACCGCAGCTAACGCGTGAAGTCGACCGCCTGGGGAGTACGGTCGCAAGATTAAAACTCAAAGGAATTGACGGGGACCCGCACAAGCGGTGGATGATGTGGATTAATTCGATGCAACGCGAAAAACCTTACCTACCCTTGACATGCCTGGAACCTTGGTGAGAGCCGAGGGTGCCTTCGGGAACCAGGACACAGGTGCTGCATGGCTGTCGTCAGCTCGTGTCGTGAGATGTTGGGTTAAGTCCCGCAACG	739	56	150	18	0	103	0	52	15	0	0	191	59	73	251	0	0	0	0	0	0	0	1017	214	0	0	88	65	383	743	352	606	0	0	470	688	0	0	83	360	190	65	105	237	28	47
db1ec0f3d6f59fa957dd430abb3ce7c6	bASV586	d__Bacteria; p__Proteobacteria; c__Gammaproteobacteria; o__Burkholderiales; f__Nitrosomonadaceae; g__mle1-7	GTAGTCCACGCCCTAAACGATGTCAACTGGTTGTTGGGGAAGGCAACTTCCTTAGTAACGAAGCTAACGCGTGAAGTTGACCGCCTGGGGAGTACGGCCGCAAGGTTAAAACTCAAAGGAATTGACGGGGACCCGCACAAGCGGTGGATGATGTGGATTAATTCGATGCAACGCGAAGAACCTTACCTACCCTTGACATGTACCGAAGCTCGATGAGAGTCGAGTGTGCCCGAAAGGGAGCGGTAACACAGGTGCTGCATGGCTGTCGTCAGCTCGTGTCGTGAGATGTTGGGTTAAGTCCCGCAA	50	0	47	664	435	273	109	1194	380	638	486	0	613	289	140	0	1352	1838	165	319	845	1017	98	9	613	968	140	107	489	0	85	85	272	309	59	241	0	0	0	51	0	0	0	30	49	119
16fee471f0069236a46f66a38761c6b3	bASV587	d__Bacteria; p__Proteobacteria; c__Alphaproteobacteria; o__Rhizobiales; f__Xanthobacteraceae; g__uncultured; s__uncultured_Pseudolabrys	GTAGTCCACGCTGTAAACGATGGATGCTAGCCGTTGGCGGGTTTACCCGTCAGTGGCGCAGCTAACGCTTTAAGCATCCCGCCTGGGGAGTACGGTCGCAAGATTAAAACTCAAAGGAATTGACGGGGGCCCGCACAAGCGGTGGAGCATGTGGTTCAATTCGACGCAACGCGAAGAACCTTACCAGCCCTTGACATCCCGGTCGCGGGAACGAGAGATCGATCCCTTCAGTTCGGCTGGACCGGAGACAGGTGCTGCATGGCTGTCGTCAGCTCGTGTCGTGAGATGTTGGGTTAAGTCCCGCAA	0	0	0	0	0	708	174	0	0	0	0	0	1087	0	0	0	0	0	223	0	0	98	0	0	0	0	0	0	0	0	0	0	0	0	0	0	0	0	0	0	0	0	0	0	0	0
366489666ef6cf9332ea6fa472d93e8c	bASV588	d__Bacteria; p__Acidobacteriota; c__Acidobacteriae; o__Acidobacteriales; f__Acidobacteriaceae_(Subgroup_1)	GTAGTCCTAGCCCTAAACGATGACTGCTTGGTGTGACGGGTACCCAATCCCGCCGTGCCGTAGCTAACGCGTTAAGCAGTCCGCCTGGGGAGTACGGTCGCAAGGCTGAAACTCAAAGGAATTGACGGGGGCCCGCACAAGCGGTGGAGCATGTGGTTTAATTCGACGCAACGCGAAGAACCTTACCTGGGCTCGAAATGTACAGGAATCCAGTGGAAACATTGGCGTCCCGCAAGGGACCTGTATATAGGTGCTGCATGGCTGTCGTCAGCTCGTGTCGTGAGATGTTGGGTTAAGTCCCGCAAC	0	0	0	49	785	406	0	28	6	10	0	0	128	0	0	0	158	0	0	37	53	54	38	0	27	0	34	0	0	0	0	0	7	0	0	0	1576	387	0	0	0	0	0	0	0	0
645cd2a049df60e21c4dd109196d9df3	bASV589	d__Bacteria; p__Proteobacteria; c__Alphaproteobacteria; o__Rhizobiales; f__Beijerinckiaceae; g__Bosea	GTAGTCCACGCCGTAAACGATGAATGCCAGCCGTTGGGGTGCATGCACCTCAGTGGCGCAGCTAACGCTTTAAGCATTCCGCCTGGGGAGTACGGTCGCAAGATTAAAACTCAAAGGAATTGACGGGGGCCCGCACAAGCGGTGGAGCATGTGGTTTAATTCGAAGCAACGCGCAGAACCTTACCAGCTTTTGACATGTCCGGTTTGATCGACAGAGATGTCTTTCTTCAGTTCGGCTGGCCGGAACACAGGTGCTGCATGGCTGTCGTCAGCTCGTGTCGTGAGATGTTGGGTTAAGTCCCGCAA	89	167	100	81	425	330	0	115	46	144	125	97	290	245	267	0	208	153	0	0	114	138	0	19	106	282	0	0	0	0	0	0	101	0	84	0	240	0	0	0	0	0	0	32	63	178
967feba84879929f13dad3475be8e889	bASV590	d__Bacteria; p__Actinobacteriota; c__Actinobacteria; o__Propionibacteriales; f__Nocardioidaceae; g__Nocardioides	GTAGTCCACACCGTAAACGTTGGGCGCTAGGTGTGGGATCCATTCCACGGGTTCCGTGCCGCAGCTAACGCATTAAGCGCCCCGCCTGGGGAGTACGGCCGCAAGGCTAAAACTCAAAGGAATTGACGGGGGCCCGCACAAGCGGCGGAGCATGCGGATTAATTCGATGCAACGCGAAGAACCTTACCTGGGTTTGACATACGCCGGAAAGCGCCAGAGATGGTGCCCCTTTTTGTCGGTGTACAGGTGGTGCATGGCTGTCGTCAGCTCGTGTCGTGAGATGTTGGGTTAAGTCCCGCAACGAGC	369	0	284	174	0	342	0	415	115	372	177	106	294	266	220	0	0	475	0	63	105	238	174	56	108	436	153	171	344	0	0	0	122	125	0	0	0	0	150	221	366	423	466	575	197	229
240408b690425c4baf291ff7e91c397a	bASV591	d__Bacteria; p__Proteobacteria; c__Gammaproteobacteria; o__Burkholderiales; f__Alcaligenaceae	GTAGTCCACGCCCTAAACGATGTCAACTAGCTGTTGGGGCCTTCGGGCCTTGGTAGCGCAGCTAACGCGTGAAGTTGACCGCCTGGGGAGTACGGTCGCAAGATTAAAACTCAAAGGAATTGACGGGGACCCGCACAAGCGGTGGATGATGTGGATTAATTCGATGCAACGCGAAAAACCTTACCTACCCTTGACATGTCTGGAATGCCGAAGAGATTTGGCAGTGCTCGCAAGAGAACCGGAACACAGGTGCTGCATGGCTGTCGTCAGCTCGTGTCGTGAGATGTTGGGTTAAGTCCCGCAACG	38	67	88	0	0	54	23	75	0	0	0	112	13	65	78	0	0	44	29	92	81	74	25	0	128	0	0	0	0	0	0	17	0	0	52	0	0	0	0	0	0	0	0	0	45	14
c352e0e56b0e42810de83151bef06b2f	bASV592	d__Bacteria; p__Actinobacteriota; c__Thermoleophilia; o__Gaiellales; f__uncultured; g__uncultured	GTAGTCCACGCCGTAAACGATGGGTGCTAGGTGTGGGCGGTGTCGACTCCGTCCGTGCCGAAGCTAACGCATTAAGCACCCCGCCTGGGGAGTACGGCCGCAAGGCTAAAACTCAAAGGAATTGACGGGGGCCCGCACAAGCAGCGGAGCATGTGGTTCAATTCGACGCAACGCGAAGAACCTTACCTAGGCTTGACATGCACTGGAATGTCGTAGAAATACGCCAGCCCTTCGGGGCCGGTGCACAGGTGGTGCATGGCTGTCGTCAGCTCGTGTCGTGAGATGTTGGGTTAAGTCCCGCAACGA	323	85	267	0	0	328	0	0	0	0	0	132	42	0	127	0	0	163	0	0	0	0	0	0	0	0	0	0	0	251	107	144	54	0	482	1577	0	0	85	219	208	58	0	60	0	141
a0c233e0df10da8e521736a87c1eebb8	bASV593	d__Bacteria; p__Proteobacteria; c__Alphaproteobacteria; o__uncultured; f__uncultured; g__uncultured; s__uncultured_bacterium	GTAGTCCACGCCGTAAACGATGAGTGCTAGACGTCGGGGGGTTCACCCTCCGGTGTCGCAGCTAACGCTTTAAGCACTCCGCCTGGGGAGTACGGTCGCAAGATTAAAACTCAAAGGAATTGACGGGGGCCCGCACAAGCGGTGGAGCATGTGGTTTAATTCGAAGCAACGCGAAGAACCTTACCAGCCCTTGACTTGGGGAGTGTGGGTCGCAGAGACGTGACCCTTCAGTTCGGCTGGCTCCCACACAGGTGCTGCATGGCTGTCGTCAGCTCGTGTCGTGAGATGTTGGGTTAAGTCCCGCAA	28	0	0	1240	0	484	129	1427	1262	252	321	0	1528	227	159	0	561	755	138	274	869	603	19	0	961	907	58	38	85	107	65	110	244	252	0	0	0	0	0	0	0	0	0	50	1204	325
0767e15e9fe0449ed452c7666766e4ac	bASV594	d__Bacteria; p__Actinobacteriota; c__Actinobacteria; o__Propionibacteriales; f__Nocardioidaceae; g__Nocardioides	GTAGTCCACACCGTAAACGTTGGGCGCTAGGTGTGGGATCCATTCCACGGGTTCCGTGCCGTAGCTAACGCATTAAGCGCCCCGCCTGGGGAGTACGGCCGCAAGGCTAAAACTCAAAGGAATTGACGGGGGCCCGCACAAGCGGCGGAGCATGCGGATTAATTCGATGCAACGCGAAGAACCTTACCTGGGTTTGACATACACCCTGCCGCTCCAGAGATGGGGCTTCTTTTGGGGGTGTACAGGTGGTGCATGGCTGTCGTCAGCTCGTGTCGTGAGATGTTGGGTTAAGTCCCGCAACGAGCG	337	0	348	0	0	0	0	144	0	154	0	433	0	0	0	0	0	0	0	0	0	0	126	0	0	0	0	0	122	0	0	83	0	0	237	1058	0	0	0	414	1266	148	118	232	0	85
648f9442b9d065e1123b4fdcb940ca3e	bASV595	d__Bacteria; p__Nitrospirota; c__Nitrospiria; o__Nitrospirales; f__Nitrospiraceae; g__Nitrospira	GTAGTCCACGCCTTAAACGATGGATACTAAGTGTCGGCGGGTTACCGCCGGTGCCGCAGCTAACGCAGTAAGTATCCCGCCTGGGAAGTACGGCCGCAAGGTTGAAACTCAAAGGAATTGACGGGGGCCCGCACAAGCGGTGGAGCATGTGGTTTAATTCGACGCAACGCGAAGAACCTTACCCAGGCTGGACATGCAGGTAGTAGGAGGGTGAAAGCCTAACGAGGTAGCAATACCAGCCTGCTCAGGTGCTGCATGGCTGTCGTCAGCTCGTGCCGTGAGGTGTTGGGTTAAGTCCCGCAACGA	650	330	479	0	0	324	0	0	0	161	215	112	0	0	307	0	0	180	0	0	67	0	0	0	72	0	0	0	157	243	109	172	0	0	110	0	0	0	13	82	58	34	75	126	0	143
751a7baba03df999b3bb8a18d5dec2f9	bASV597	d__Bacteria; p__Proteobacteria; c__Alphaproteobacteria; o__Rhizobiales; f__Rhizobiales_Incertae_Sedis; g__Nordella; s__Nordella_oligomobilis	GTAGTCCACGCCGTAAACTATGGGTGCTAGCTGTCAGCGGGCTTGCTCGTTGGTGGCGCAGCTAACGCATTAAGCACCCCGCCTGGGGAGTACGGTCGCAAGATTAAAACTTAAAGGAATTGACGGGGGCCCGCACAAGCGGTGGAGCATGTGGTTTAATTCGAAGCAACGCGCAGAACCTTACCAACCCTTGACATCCCGATCGCGGACACCAGAGATGGAGTCCTTCAGTTCGGCTGGATCGGAGACAGGTGCTGCATGGCTGTCGTCAGCTCGTGTCGTGAGATGTTGGGTTAAGTCCCGCAA	0	0	0	586	0	653	116	579	359	702	258	0	2053	445	159	0	402	708	218	182	687	268	0	0	407	0	0	0	41	0	0	53	159	145	0	0	0	0	0	0	0	0	53	79	187	251
77a73490b4df22009e9e7290c3bb5f55	bASV598	d__Bacteria; p__Actinobacteriota; c__Actinobacteria; o__Frankiales; f__Acidothermaceae; g__Acidothermus	GTAGTCCACGCCGTAAACGTTGGGCGCTAGGTGTGGGGTCCTTCCACGGATTCCGTGCCGCAGCTAACGCATTAAGCGCCCCGCCTGGGGAGTACGGCCGCAAGGCTAAAACTCAAAGGAATTGACGGGGGCCCGCACAAGCGGCGGAGCATGTTGCTTAATTCGACGCAACGCGAAGAACCTTACCAAGGCTTGACATGCAGGGAAAAGCCGTGGAGACACGGTGTCCGTAAGGGTCCTGCACAGGTGGTGCATGGCTGTCGTCAGCTCGTGTCGTGAGATGTTGGGTTAAGTCCCGCAACGAGC	0	0	0	0	0	0	0	0	0	0	0	0	0	0	0	0	0	0	0	0	0	56	216	145	0	0	0	0	0	0	0	0	0	0	0	0	44	0	0	0	0	0	0	0	0	0
de9cb549aec72f84cb61c2c150ce51a4	bASV600	d__Bacteria; p__Bacteroidota; c__Bacteroidia; o__Chitinophagales; f__Chitinophagaceae; g__Terrimonas	GTAGTCCACGCCCTAAACTATGGATACTCGACATTTGCGATAAACTGCAAGTGTCTGAGCGAAAGCATTAAGTATCCCACCTGGGAAGTACGACCGCAAGGTTGAAACTCAAAGGAATTGGCGGGGGTCCGCACAAGCGGTGGAGCATGTGGTTTAATTCGATGATACGCGAGGAACCTTACCTGGGCTAGAATGCTGGGAGACCGTGGGTGAAAGCTCACTTTGTAGCAATACACTGCCAGTAAGGTGCTGCATGGCTGTCGTCAGCTCGTGCCGTGAGGTGTTGGGTTAAGTCCCGCAACGAGC	28	0	0	0	0	0	0	0	0	0	0	0	0	133	281	0	0	0	0	0	0	0	1909	0	0	0	957	147	5648	945	131	196	0	0	665	1053	0	0	0	295	0	51	43	78	0	231
49b50f8f31054a1a594319fae39ed688	bASV601	d__Bacteria; p__Proteobacteria; c__Alphaproteobacteria; o__Rhizobiales; f__Xanthobacteraceae; g__uncultured	GTAGTCCACGCCGTAAACGATGGATGCTAGCCGTTGGGGGGTTTACCCTTCAGTGGCGCAGCTAACGCATTAAGCATCCCGCCTGGGGAGTACGGTCGCAAGATTAAAACTCAAAGGAATTGACGGGGGCCCGCACAAGCGGTGGAGCATGTGGTTCAATTCGAAGCAACGCGCAGAACCTTACCAGCCTTTGACATCCCGGTCGCGAGCACCAGAGATGGAGCTCTTCAGTTCGGCTGGACCGGAGACAGGTGCTGCATGGCTGTCGTCAGCTCGTGTCGTGAGATGTTGGGTTAAGTCCCGCAA	0	0	0	0	0	580	0	0	0	0	0	0	1392	232	0	0	0	359	82	0	0	0	0	0	0	0	0	0	0	0	0	0	0	0	0	0	0	0	0	0	0	0	0	0	0	159
2369f36e443cbf73b967e8b7ff297e91	bASV602	d__Bacteria; p__Proteobacteria; c__Alphaproteobacteria; o__Rhizobiales; f__Xanthobacteraceae; g__uncultured	GTAGTCCACGCCGTAAACGATGGATGCTAGCCGTTGTCGGGTTTACCCGTCAGTGGCGCAGCTAACGCATTAAGCATCCCGCCTGGGGAGTACGGTCGCAAGATTAAAACTCAAAGGAATTGACGGGGGCCCGCACAAGCGGTGGAGCATGTGGTTCAATTCGAAGCAACGCGCAGAACCTTACCAGCCTTTGACATCCCGGTCGCGGGCACCAGAGATGGAGCCCTTCAGTTCGGCTGGACCGGAGACAGGTGCTGCATGGCTGTCGTCAGCTCGTGTCGTGAGATGTTGGGTTAAGTCCCGCAA	0	0	0	0	509	0	0	0	0	0	0	0	0	156	0	0	0	0	0	0	0	101	1624	1013	0	0	34	0	0	0	37	0	0	0	0	0	0	0	0	0	0	0	0	0	0	0
ffe409cd998e1a6d0086b8da602e086f	bASV603	d__Bacteria; p__Proteobacteria; c__Gammaproteobacteria; o__Gammaproteobacteria_Incertae_Sedis; f__Unknown_Family; g__Acidibacter	GTAGTCCACGCCATAAACGATGAGGACTAGACGTTGGAGGGGTAAGCCTTTCAGTGTCGTAGCTAACGCGCTAAGTCCTCCGCCTGGGGAGTACGGCCGCAAGGTTGAAACTCAAAGGAATTGACGGGGACCCGCACAAGCGGTGGAGCATGTGGTTTAATTCGATGCAACGCGAAGAACCTTACCTGGTCTTGACATCCATGGAACCCTGCAGAGATGTGGGGGTGCCGTAAGGAACCATGAGACAGGTGCTGCATGGCTGTCGTCAGCTCGTGTCGTGAGATGTTGGGTTAAGTCCCGCAACGA	237	0	0	169	0	173	0	205	63	364	0	0	95	362	276	0	0	498	0	161	213	436	103	0	347	752	0	0	221	0	149	208	189	0	135	0	0	0	0	0	0	102	62	78	101	158
d1d3cd0cde6b6e9e6066f5e6ac3898c5	bASV604	d__Bacteria; p__Actinobacteriota; c__Actinobacteria; o__Propionibacteriales; f__Propionibacteriaceae; g__Microlunatus	GTAGTCCACGCCGTAAACGGTGGGCACTAGGTGTGGGACTCATTCCACGAGTTCCGTGCCGTAGCTAACGCATTAAGTGCCCCGCCTGGGGAGTACGGCCGCAAGGCTAAAACTCAAAGGAATTGACGGGGGCCCGCACAAGCGGCGGAGCATGCGGATTAATTCGATGCAACGCGAAGAACCTTACCTGGGTTTGACATATACCGGAAAGCTGCAGAGATGTAGCCCCCGCAAGGTCGGTATACAGGTGGTGCATGGCTGTCGTCAGCTCGTGTCGTGAGATGTTGGGTTAAGTCCCGCAACGAG	770	170	188	0	102	186	83	230	128	171	0	444	43	288	309	0	0	77	0	131	79	222	176	69	137	0	87	117	423	0	71	107	103	43	198	696	0	0	308	1363	826	216	261	453	85	90
a06319bdd0803dc45253522fe9bb4997	bASV605	d__Bacteria; p__Proteobacteria; c__Gammaproteobacteria; o__Gammaproteobacteria_Incertae_Sedis; f__Unknown_Family; g__Acidibacter	GTAGTCCACGCCATAAACGATGAGAACTAGACGTTGAAGGGGTAAGCCCTCCAGTGTCGTAGCTAACGCGCTAAGTTCTCCGCCTGGGGAGTACGGCCGCAAGGTTGAAACTCAAAGGAATTGACGGGGACCCGCACAAGCGGTGGAGCATGTGGTTTAATTCGATGCAACGCGAAGAACCTTACCTGGTCTTGACATCCTGGGAACCCTGTAGAGATATGGGGGTGCCGCAAGGAACCCAGAGACAGGTGCTGCATGGCTGTCGTCAGCTCGTGTCGTGAGATGTTGGGTTAAGTCCCGCAACGA	0	0	0	0	476	103	76	107	0	0	0	0	221	0	0	0	0	106	95	0	87	140	874	173	87	0	0	0	61	0	0	0	0	0	0	0	653	365	0	0	0	0	0	0	0	0
304b839a45eeb6c30719c7862177fa5d	bASV606	d__Bacteria; p__Actinobacteriota; c__Thermoleophilia; o__Solirubrobacterales; f__Solirubrobacteraceae; g__Solirubrobacter; s__uncultured_bacterium	GTAGTCCACGCTGTAAACGATGGGCACTAGGTGTGGGGGGTGTCGACTCCCTCCGTGCCGAAGCTAACGCATTAAGTGCCCCGCCTGGGGAGTACGGCCGCAAGGCTAAAACTCAAAGGAATTGACGGGGGCCCGCACAAGCAGCGGAGCATGTGGTTTAATTCGACGCAACGCGAAGAACCTTACCTGGGCTTGACATGTAGGTCATACCCGTGGAAACACGGGGTCAGTTCGGCTGGACCTTCACAGGTGGTGCATGGCTGTCGTCAGCTCGTGTCGTGAGATGTTGGGTTAAGTCCCGCAACG	108	0	64	103	0	149	146	228	70	312	0	53	264	131	252	0	799	233	144	68	148	510	268	48	116	526	152	146	757	0	107	141	178	76	203	599	0	0	293	424	590	431	420	773	103	122
93d513d4c0a7a255bd4a07a56a0c7ef6	bASV608	d__Bacteria; p__Actinobacteriota; c__Thermoleophilia; o__Gaiellales; f__uncultured; g__uncultured; s__uncultured_Rubrobacterales	GTAGTCCACGCCGTAAACGATGGGAACTAGGTGTGGGGGGTGTCGACTCCCTCCGTGCCGAAGCTAACGCATTAAGTTCCCCGCCTGGGGAGTACGGCCGCAAGGCTAAAACTCAAAGGAATTGACGGGGGCCCGCACAAGCAGCGGAGCATGTGGTTCAATTCGACGCAACGCGAAGAACCTTACCTAGGCTTGACATGCACTGGAATTGCATAGAAATATGTAAGCCCTTCGGGGCTAGTGCACAGGTGGTGCATGGCTGTCGTCAGCTCGTGTCGTGAGATGTTGGGTTAAGTCCCGCAACGA	144	102	116	336	0	255	0	561	209	377	229	106	57	110	256	0	0	511	0	58	94	121	45	0	98	0	54	68	1553	390	240	371	118	215	224	347	0	0	0	117	138	321	493	786	109	203
ae6c21121f1a346ca837d92abb30d255	bASV609	d__Bacteria; p__Actinobacteriota; c__Thermoleophilia; o__Gaiellales	GTAGTCCACGCCGTAAACGATGGGTGCTAGGTGTGGGCGGTGTCGACTCCGTCCGTGCCGAAGCTAACGCATTAAGCACCCCGCCTGGGGAGTACGGCCGCAAGGCTAAAACTCAAAGGAATTGACGGGGGCCCGCACAAGCAGCGGAGCATGTGGTTTAATTCGACGCGACGCGAAGAACCTTACCAAGGCTTGACATGACCAGGAATGTCGTAGAAATACGGCAGCCCTTCGGGGCCTGGCCACAGGTGGTGCATGGCTGTCGTCAGCTCGTGTCGTGAGATGTTGGGTTAAGTCCCGCAACGA	54	0	0	0	2045	543	0	40	0	30	37	0	829	139	0	0	0	562	0	25	0	62	522	142	0	0	43	35	101	0	18	26	97	126	24	191	22	16	0	12	15	33	71	120	0	284
4ee5791e19ecf9e1e93fbd0726901c41	bASV610	d__Bacteria; p__Proteobacteria; c__Gammaproteobacteria	GTAGTCCACGCCGGAGCTAACGCGTTAAGTCGACCGCCTGGGGAGTACGGCCTAAACGATGTCGACTTGGAGGTTGTGCCCTTGAGGCGTGGCTTCCGGCAAGGTTAAAACTCAAATGAATTGACGGGGGCCCGCACAAGCGGTGGAGCATGTGGTTTAATTCGATGCAACGCGAAGGAACCGTGAGACAGGTGCTGCATGGCTGTCGTCAGCTCGTGTTGTGAAATGTTGGGTTAAGTCCCGCAACGAGCGCAACCCTTGTCCCTAGTTGCTACGCAAGGGCACTCTAGGGAGACTGCCGGTGAC	279	0	0	399	0	323	0	419	0	0	0	0	380	391	548	0	0	0	0	0	0	287	393	269	0	0	380	281	367	0	287	450	482	0	206	1677	79	0	0	0	0	0	0	0	371	0
b9fd3d4f31597f4880852dd1b3a01442	bASV612	d__Bacteria; p__Actinobacteriota; c__Actinobacteria; o__Frankiales; f__Acidothermaceae; g__Acidothermus	GTAGTCCACGCCGTAAACGTTGGGCGCTAGGTGTGGGGTCCTTCCACGGATTCCGTGCCGCAGCTAACGCATTAAGCGCCCCGCCTGGGGAGTACGGCCGCAAGGCTAAAACTCAAAGGAATTGACGGGGGCCCGCACAAGCGGCGGAGCATGTTGCTTAATTCGACGCAACGCGAAGAACCTTACCAAGGCTTGACATGCAGGGAAAAGCCGTAGAGATACGGTGTCCGTAAGGGTCCTGCACAGGTGGTGCATGGCTGTCGTCAGCTCGTGTCGTGAGATGTTGGGTTAAGTCCCGCAACGAGC	0	0	0	0	0	173	137	0	0	0	0	0	122	0	0	0	0	0	0	0	0	63	88	0	0	0	0	0	0	0	0	0	0	0	0	0	0	0	0	0	0	0	0	0	0	0
70363895d10eee64cfddb38e1e145cc6	bASV613	d__Bacteria; p__Proteobacteria; c__Gammaproteobacteria; o__Burkholderiales; f__Methylophilaceae; g__Methylophilus	GTAGTCCACGCCCTAAACGATGTCTACTAGTTGTTGGTGGAGTAAAATCCATGAGTAACGCAGCTAACGCGTGAAGTAGACCGCCTGGGGAGTACGGTCGCAAGATTAAAACTCAAAGGAATTGACGGGGGCCCGCACAAGCGGTGGATTATGTGGATTAATTCGATGCAACGCGAAAAACCTTACCTGGCCTTGACATGCCACTAACGAAGCAGAGATGCATTAGGTGCCCGTAAGGGAAAGTGGACACAGGTGCTGCATGGCTGTCGTCAGCTCGTGTCGTGAGATGTTGGGTTAAGTCCCGCA	0	0	0	465	0	0	0	0	0	0	0	0	0	0	0	0	0	0	28	0	0	23	0	21	0	0	0	0	0	0	0	0	0	0	35	0	0	0	0	0	0	0	0	0	0	0
4274194ccffd2690406d4c3d5680cd43	bASV614	d__Bacteria; p__Firmicutes; c__Bacilli; o__Bacillales; f__Bacillaceae; g__Fictibacillus	GTAGTCCACGCCGTAAACGATGAGTGCTAGGTGTTGGGGGGTTCCACCCTCAGTGCTGAAGTTAACACATTAAGCACTCCGCCTGGGGAGTACGACCGCAAGGTTGAAACTCAAAGGAATTGACGGGGGCCCGCACAAGCAGTGGAGCATGTGGTTTAATTCGAAGCAACGCGAAGAACCTTACCAGGTCTTGACATCCTCTGACCACTCTAGAGATAGAGCTTTCCCCTTCGGGGGACAGAGTGACAGGTGGTGCATGGTTGTCGTCAGCTCGTGTCGTGAGATGTTGGGTTAAGTCCCGCAACG	187	57	196	874	0	127	0	870	500	159	0	121	898	125	253	0	0	417	0	89	32	18	0	0	31	0	0	0	18	0	0	0	110	118	0	0	0	0	0	111	63	65	123	91	3390	330
43976d636bdfaa1ea56d89438eab6c82	bASV615	d__Bacteria; p__Myxococcota; c__Polyangia; o__Polyangiales; f__Polyangiaceae; g__Pajaroellobacter	GTAGTCCACGCCGTAAACGATGGGTGCTAGGTGTCGCGGGCTTTGACTCCCGCGGTGCCGTAGCTAACGCATTAAGCACCCCGCCTGGGAAGTACGGCCGCAAGGCTAAAACTCAAAGGAATTGACGGGGGCCCGCACAAGCGGTGGAGCATGTGGTTTAATTCGACGCAACGCGAAGAACCTTACCTGGGCTAGAAAATGCAGGAACCTGGGAGAAGTCTCGGGGTGCTCTTCGGAGAGCCTGTAGTTAGGTGCTGCATGGCTGTCGTCAGCTCGTGTCGTGAGATGTTGGGTTAAGTCCCGCAA	139	69	91	312	0	135	234	494	222	198	324	0	168	130	314	0	0	526	415	252	426	246	358	89	275	619	0	219	122	0	0	0	0	407	0	0	104	0	0	116	135	99	104	102	162	168
6fd7ce975476af6c5939195c55aa3bb3	bASV616	d__Bacteria; p__Actinobacteriota; c__Actinobacteria; o__Propionibacteriales; f__Nocardioidaceae; g__Aeromicrobium	GTAGTCCATGCCGTAAACGTTGGGCGCTAGGTGTGGGGACCTTCCACGGTTTCCGTGCCGCAGCTAACGCATTAAGCGCCCCGCCTGGGGAGTACGGCCGCAAGGCTAAAACTCAAAGGAATTGACGGGGGCCCGCACAAGCGGCGGAGCATGCTGATTAATTCGATGCAACGCGAAGAACCTTACCTGGGTTTGACATATGCCGGAAAGCTGCAGAGATGTGGCCCCCCTTGTGGTCGGTATACAGGTGGTGCATGGCTGTCGTCAGCTCGTGTCGTGAGATGTTGGGTTAAGTCCCGCAACGAG	141	0	65	80	0	0	30	0	0	43	0	0	0	28	0	0	0	30	23	0	0	0	0	227	0	0	0	0	0	0	0	0	0	0	0	0	0	15	0	0	0	0	0	0	0	0
1d1db24936ea9f00a65e6764dff111da	bASV617	d__Bacteria; p__Chloroflexi; c__Dehalococcoidia; o__S085; f__S085; g__S085; s__uncultured_bacterium	GTAGTCCACGCCCTAAACTGTGGATGCTAGGTGTGGGGGGTGTCGACCCCCTCTGTGCCGTAGCTAACGCTTTAAGCATCCCGCCTGGGGAGTACGGCCGCAAGGCTAAAACTCAAAGGAATTGACGGGGGCCCGCACAAGCGGCGGAGCGTGTGGTTTAATTCGATGCAACGCGAAGAACCTTACCAGGGCTTGACATGCTGGTGGTACGGATCCGAAAGGTGAAGGACCCTTCGGGGAGCCAGCACAGGTGCTGCATGGCTGTCGTCAGCTCGTGCCGTGAGGTGTTGGGTTAAGTCCCGCAAC	0	0	0	3490	0	428	163	4390	3182	223	0	0	1231	68	215	0	101	3801	407	175	471	0	0	0	195	0	0	0	0	0	0	0	327	596	0	0	0	0	0	0	0	45	90	103	1027	335
60e5a3a8d7d00e4389eb6eba8b38a5e2	bASV618	d__Bacteria; p__Acidobacteriota; c__Acidobacteriae; o__Acidobacteriales; f__uncultured; g__uncultured	GTAGTCCTAGCCCTAAACGATGATTGCTTGGTGTGTCGGGTACCCAATCCCGACGTGCCGCAGCTAACGCGATAAGCAATCCGCCTGGGGAGTACGGTCGCAAGACTGAAACTCAAAGGAATTGACGGGGGCCCGCACAAGCGGTGGAGCATGTGGTTCAATTCGACGCAACGCGAAGAACCTTACCTGGGCTCGAAATGTAGTGGACCGGGGTGGAAACATCCCTTCCCGCAAGGGCTGCTATATAGGTGCTGCATGGCTGTCGTCAGCTCGTGTCGTGAGATGTTGGGTTAAGTCCCGCAACGA	0	0	0	392	0	816	163	432	253	68	91	0	460	113	0	0	838	598	197	186	215	323	0	0	266	0	0	0	0	0	0	0	0	0	0	0	41	0	0	0	0	0	0	0	49	131
67958d8b5d99c25f0711c9e45baac77b	bASV619	d__Bacteria; p__Proteobacteria; c__Alphaproteobacteria; o__Rhizobiales; f__Xanthobacteraceae; g__Rhodoplanes	GTAGTCCACGCCGTAAACGATGGATGCTAGCCGTTGGTGGGTTTACCCTTCAGTGGCGCAGCTAACGCATTAAGCATCCCGCCTGGGGAGTACGGTCGCAAGATTAAAACTCAAAGGAATTGACGGGGGCCCGCACAAGCGGTGGAGCATGTGGTTCAATTCGAAGCAACGCGCAGAACCTTACCAGCTCTTGACATGCCACGACGGTTTCCAGAGATGGATTCCTCCCCGCAAGGGGCGTGGACACAGGTGCTGCATGGCTGTCGTCAGCTCGTGTCGTGAGATGTTGGGTTAAGTCCCGCAACG	0	0	0	0	0	0	0	0	0	0	0	0	0	0	0	0	0	0	0	0	0	0	0	0	0	0	0	0	0	0	0	0	0	0	0	0	0	0	0	0	0	0	0	0	0	0
165ef5fd8aab33ae00662d2104a958d8	bASV620	d__Bacteria; p__Proteobacteria; c__Alphaproteobacteria; o__uncultured; f__uncultured; g__uncultured; s__uncultured_Rhodospirillaceae	GTAGTCCACGCCGTAAACGATGAGTGCTAGACGTCGGGGGGCTTGCCCTTCGGTGTCGCCGCTAACGCATTAAGCACTCCGCCTGGGGAGTACGGTCGCAAGATTAAAACTCAAAGGAATTGACGGGGGCCCGCACAAGCGGTGGAGCATGTGGTTTAATTCGAAGCAACGCGAAGAACCTTACCAGCCCTTGACATGGGACGTATGGGAAGCAGAGACGCTTCTCTTCAGTTCGGCTGGCGTCCACACAGGTGCTGCATGGCTGTCGTCAGCTCGTGTCGTGAGATGTTGGGTTAAGTCCCGCAA	0	0	0	179	742	458	0	99	42	0	116	0	1208	65	0	0	602	124	0	135	157	196	557	0	186	249	0	0	0	0	0	0	69	0	0	0	141	47	0	0	0	0	0	0	0	12
933501870fa739cc6d96957bd82fc981	bASV621	d__Bacteria; p__Acidobacteriota; c__Acidobacteriae; o__Acidobacteriales; f__Acidobacteriaceae_(Subgroup_1); g__Edaphobacter	GTAGTCCTAGCCCTAAACGATGATTGCTTGGTGTGACAGGTACCCAATCCTGTCGTGCCGAAGCTAACGCGATAAGCAATCCGCCTGGGGAGTACGGTCGCAAGGCTGAAACTCAAAGGAATTGACGGGGGCCCGCACAAGCGGTGGAGCATGTGGTTTAATTCGACGCAACGCGAAGAACCTTACCTGGGCTCGAAATGTAGTGGAATCCGGTAGAAATATCGGCGTCTAGCAATAGACCGCTATATAGGTGCTGCATGGCTGTCGTCAGCTCGTGTCGTGAGATGTTGGGTTAAGTCCCGCAAC	0	0	0	0	850	58	0	0	0	0	0	0	41	0	0	0	0	0	0	0	0	0	754	1149	0	0	0	0	0	0	87	0	0	21	0	322	1539	607	0	0	0	0	0	0	0	0
a33702a7405c400b2fce1405220d7bbc	bASV622	d__Bacteria; p__Proteobacteria; c__Alphaproteobacteria; o__Rhizobiales; f__Beijerinckiaceae; g__Microvirga	GTAGTCCACGCCGTAAACGATGAATGCCAGCCGTTGGGCAGCTTGCTGCTCAGTGGCGCAGCTAACGCTTTAAGCATTCCGCCTGGGGAGTACGGTCGCAAGATTAAAACTCAAAGGAATTGACGGGGGCCCGCACAAGCGGTGGAGCATGTGGTTTAATTCGAAGCAACGCGCAGAACCTTACCAGCCTTTGACATGTCCGGTATGGACCCTGGAGACGGGGTTCTTCAGTTCGGCTGGCCGGAACACAGGTGCTGCATGGCTGTCGTCAGCTCGTGTCGTGAGATGTTGGGTTAAGTCCCGCAA	1197	288	814	0	0	56	0	0	0	41	0	351	0	102	277	0	0	0	0	0	0	0	0	0	0	0	0	0	279	284	76	147	0	0	391	125	0	0	250	724	405	142	171	352	113	49
f3fc0eb59852bd66e8efc7d2c61433c5	bASV623	d__Bacteria; p__Actinobacteriota; c__Thermoleophilia; o__Gaiellales; f__Gaiellaceae; g__Gaiella	GTAGTCCACGCTGTAAACGATGGGTGCTAGGTGTGGGCGGTGTCGACTCCGTCCGTGCCGAAGCTAACGCATTAAGCACCCCGCCTGGGGAGTACGGCCGCAAGGCTAAAACTCAAAGGAATTGACGGGGGCCCGCACAAGCAGCGGAGCATGTTGTTTAATTCGACGCGACGCGAAGAACCTTACCAGGGCTTGACATGCACGGGAATGTCGTAGAAATACGGCAGCCCTTCGGGGCTCGTGCACAGGTGGTGCATGGCTGTCGTCAGCTCGTGTCGTGAGATGTTGGGTTAAGTCCCGCAACGA	0	0	51	315	0	438	180	508	186	235	0	0	498	67	49	0	0	523	216	177	120	124	0	0	134	0	46	30	342	0	0	0	62	95	0	0	0	0	0	0	0	150	232	371	0	202
e2fe77732be412ca70429e4fd7753d37	bASV624	d__Bacteria; p__Proteobacteria; c__Alphaproteobacteria; o__Rhizobiales; f__Xanthobacteraceae; g__uncultured	GTAGTCCACGCCGTAAACGATGGATGCTAGCCGTTGGTGGGTTTACCCTTCAGTGGCGCAGCTAACGCATTAAGCATCCCGCCTGGGGAGTACGGTCGCAAGATTAAAACTCAAAGGAATTGACGGGGGCCCGCACAAGCGGTGGAGCATGTGGTTCAATTCGAAGCAACGCGCAGAACCTTACCAGCCTTTGACATCCCGGTCGCGAGTACCAGAGATGGAACTCTTCAGTTCGGCTGGACCGGAGACAGGTGCTGCATGGCTGTCGTCAGCTCGTGTCGTGAGATGTTGGGTTAAGTCCCGCAA	0	0	0	364	1177	191	132	327	238	0	0	0	941	83	0	0	0	56	263	68	172	237	887	197	169	0	137	72	217	0	28	0	0	0	0	320	79	37	0	0	0	42	98	135	0	0
dd4ffa7296205e41bc7af4b47a7123ae	bASV625	d__Bacteria; p__Actinobacteriota; c__Thermoleophilia; o__Solirubrobacterales; f__67-14; g__67-14; s__uncultured_bacterium	GTAGTCCACGCCGTAAACGATGGGCACTAGGTGTGGGAGGTGTCGACTCCTCCCGTGCCGGAGCTAACGCATTAAGTGCCCCGCCTGGGGAGTACGGCCGCAAGGCTAAAACTCAAAGGAATTGACGGGGACCCGCACAAGCAGCGGAGCATGTGGTTTAATTCGACGCAACGCGAAGAACCTTACCTGGGTTTGACATGTTCCTGACCACCCTGGAAACAGGGTTTCCCTTCGGGGCAGGATCACAGGTGGTGCATGGCTGTCGTCAGCTCGTGTCGTGAGATGTTGGGTTAAGTCCCGCAACGA	411	172	155	0	286	0	0	0	0	0	0	187	0	191	125	0	0	524	0	0	0	0	298	69	0	0	87	0	289	471	148	170	134	176	203	1373	0	0	174	386	517	341	380	627	0	0
ba991b4bc241d5c5bd1bac919ea72d04	bASV626	d__Bacteria; p__Acidobacteriota; c__Acidobacteriae; o__Acidobacteriales; f__uncultured; g__uncultured	GTAGTCCTAGCCCTAAACGATGGATGCTTGGTGTGTCGGGTACCCAATCCCGACGTGCCGAAGCTAACGCGATAAGCATCCCGCCTGGGGAGTACGGTCGCAAGGCTGAAACTCAAAGGAATTGACGGGGGCCCGCACAAGCGGTGGAGCATGTGGTTCAATTCGACGCAACGCGAAGAACCTTACCTGGGCTCGAAGCGCAGTGGACCGGGGTAGAAATATCCCTTTCCGCAAGGACTGCTGCGGAGGTGCTGCATGGCTGTCGTCAGCTCGTGTCGTGAGATGTTGGGTTAAGTCCCGCAACGA	0	0	0	0	0	0	343	0	0	0	0	0	0	0	0	0	0	0	386	0	0	438	110	0	0	0	0	0	0	0	0	0	0	0	0	0	63	0	0	0	0	0	0	0	0	0
ad17ad293026767c2c83fa1829d3c777	bASV627	d__Bacteria; p__Acidobacteriota; c__Acidobacteriae; o__Solibacterales; f__Solibacteraceae; g__Candidatus_Solibacter	GTAGTCCACGCCCTAAACGATGCATATTTGGTGTGGGTCATTCAGTTGATCCGTGCCGGAGCTAACGCGTTAAATATGCCGCCTGGGGAGTACAGTCGCAAGGCTGAAACTCAAAGGAATTGACGGGGGCCCGCACAAGCGGTGGAGCATGTGGTTCAATTCGACGCAACGCGAAGAACCTTACCTGGGCTCGAACGGCTGGTCAACGGCGGTGGAAACATCGCTACCCCGCAAGGGGGTCCAGTCGAGGTGCTGCATGGCTGTCGTCAGCTCGTGTCGTGAGATGTTGGGTTAAGTCCCGCAACG	0	0	0	154	0	226	0	145	147	0	0	0	307	0	0	0	0	0	172	0	0	116	306	175	0	0	131	109	116	0	208	0	0	0	0	0	130	107	0	0	0	0	134	143	0	0
e8e6710c8999bcddcac5f81ed50c4351	bASV628	d__Bacteria; p__Proteobacteria; c__Alphaproteobacteria; o__Rhizobiales; f__Hyphomicrobiaceae; g__Hyphomicrobium	GTAGTCCACGCCGTAAACTATGGATGCTAGCCGTCGGCAAGCTTGCTTGTCGGTGGCGCAGCTAACGCTTTAAGCATCCCGCCTGGGGAGTACGGCCGCAAGGTTAAAACTCAAAGGAATTGACGGGGGCCCGCACAAGCGGTGGAGCATGTGGTTTAATTCGACGCAACGCGAAGAACCTTACCAGCTCTTGACATGTCCGGACGGTTTCCAGAGATGGGATCCTCCTAGCAATAGGCCGGAACACAGGTGCTGCATGGCTGTCGTCAGCTCGTGTCGTGAGATGTTGGGTTAAGTCCCGCAACG	32	0	68	340	0	168	169	427	168	627	224	0	245	375	90	0	668	851	212	304	588	575	0	0	437	695	0	0	161	0	0	0	243	235	0	0	0	0	0	0	0	18	32	62	275	840
c5bb25cd6e4a5ecbc05bc4a92e5f6c70	bASV629	d__Bacteria; p__Proteobacteria; c__Alphaproteobacteria; o__Sphingomonadales; f__Sphingomonadaceae; g__Novosphingobium	GTAGTCCACGCCGTAAACGATGATAACTAGCTGTCCGGGCACATGGTGCTTGGGTGGCGCAGCTAACGCATTAAGTTATCCGCCTGGGGAGTACGGTCGCAAGATTAAAACTCAAAGGAATTGACGGGGGCCTGCACAAGCGGTGGAGCATGTGGTTTAATTCGAAGCAACGCGCAGAACCTTACCAGCGTTTGACATCCTCATCGCGATTTCCAGAGATGGATTTCTTCAGTTCGGCTGGATGAGTGACAGGTGCTGCATGGCTGTCGTCAGCTCGTGTCGTGAGATGTTGGGTTAAGTCCCGCA	0	93	0	111	0	0	0	244	93	0	0	0	70	224	0	0	0	0	0	0	49	0	243	204	81	0	149	279	362	366	106	172	0	0	0	0	111	0	0	0	0	0	0	0	0	55
9f85ae9fb0de6f3ebbb5efe09ac19be1	bASV630	d__Bacteria; p__Actinobacteriota; c__Actinobacteria; o__Propionibacteriales; f__Nocardioidaceae; g__Kribbella	GTAGTCCACGCCGTAAACGTTGGGCGCTAGGTGTGGGGGACATTCCACGTCCTCCGTGCCGCAGCTAACGCATTAAGCGCCCCGCCTGGGGAGTACGGCCGCAAGGCTAAAACTCAAAGGAATTGACGGGGGCCCGCACAAGCGGCGGAGCATGCGGATTAATTCGATGCAACGCGAAGAACCTTACCTGGGTTTGACATATAGGGAAATCCTCCAGAGATGGGGGGTCCGTAAGGGTCCTATACAGGTGGTGCATGGCTGTCGTCAGCTCGTGTCGTGAGATGTTGGGTTAAGTCCCGCAACGAG	204	124	164	85	0	70	52	127	123	336	0	437	0	0	177	0	419	167	0	75	77	98	278	45	84	0	0	0	73	192	56	98	71	57	252	0	43	0	63	113	121	449	676	569	530	0
7d2411b9821f041c41faf420abd70da2	bASV631	d__Bacteria; p__Actinobacteriota; c__Thermoleophilia; o__Solirubrobacterales; f__Solirubrobacteraceae; g__Solirubrobacter; s__uncultured_Solirubrobacter	GTAGTCCACGCTGTAAACGATGGGCACTAGGTGTGGGGGGTGTCGACTCCCTCCGTGCCGAAGCTAACGCATTAAGTGCCCCGCCTGGGGAGTACGGCCGCAAGGCTAAAACTCAAAGGAATTGACGGGGGCCCGCACAAGCAGCGGAGCATGTGGTTTAATTCGACGCAACGCGAAGAACCTTACCTGGGCTTGACATGTAGGTCGCACCCGTGGAAACACGGGGTCGGTTCGGCCGGACCTTCACAGGTGGTGCATGGCTGTCGTCAGCTCGTGTCGTGAGATGTTGGGTTAAGTCCCGCAACG	477	85	194	0	0	0	0	0	0	0	0	126	0	0	209	0	0	65	0	0	0	0	0	0	0	0	0	0	31	0	16	61	0	0	232	262	0	0	184	561	648	63	96	225	190	39
d505ee99da6c2bce35287ae513b1bb72	bASV632	d__Bacteria; p__Proteobacteria; c__Alphaproteobacteria; o__Rhizobiales; f__Xanthobacteraceae; g__uncultured	GTAGTCCACGCCGTAAACGATGGATGCTAGCCGTTGGCGGGTTTACTCGTCAGTGGCGCAGCTAACGCATTAAGCATCCCGCCTGGGGAGTACGGTCGCAAGATTAAAACTCAAAGGAATTGACGGGGGCCCGCACAAGCGGTGGAGCATGTGGTTCAATTCGAAGCAACGCGCAGAACCTTACCAGCCCTTGACATCCCGGTCGCGGGCACCAGAGATGGAGCCTTTCAGTTCGGCTGGACCGGAGACAGGTGCTGCATGGCTGTCGTCAGCTCGTGTCGTGAGATGTTGGGTTAAGTCCCGCAA	666	156	482	142	0	106	0	229	73	286	195	194	45	174	638	0	0	606	0	116	168	398	76	0	177	873	37	0	124	0	84	256	274	232	95	0	70	29	52	162	136	0	0	0	211	302
c497806a3f887bf84fae89eab6248ab2	bASV633	d__Bacteria; p__NB1-j; c__NB1-j; o__NB1-j; f__NB1-j; g__NB1-j	GTAGTCCACGCCGTAAACGTTGAGTGCTAGGTGTCGCGGGTATTGACCCCTGCGGTGCCGTCGTTAACGCATTTAGCACTCCGCCTGGGGAGTACGGTCGCAAGGCTAAAACTCAAAGGAATTGACGGGGGCCCGCACAAGCGGTGGAGCATGTGGTTTAATTCGAAGCAACGCGCAGAACCTTACCTGGACTTGACATCTACGGAACCTCCTGGAAACAGGAGGGTGCCTTCGGGAACCGTAAGACAGGTGCTGCATGGCTGTCGTCAGCTCGTGTCGTGAGGTGTTGGGTTAAGTCCCGCAACG	0	0	143	411	0	251	0	486	313	193	153	0	216	108	105	0	0	428	0	115	346	96	135	0	315	0	0	0	271	0	407	570	0	0	0	408	14	0	181	394	265	146	349	665	367	199
02a6e7b905de7aa8c4434473e11ab96e	bASV634	d__Bacteria; p__Proteobacteria; c__Alphaproteobacteria; o__Rhizobiales; f__Rhodomicrobiaceae; g__Rhodomicrobium; s__uncultured_Alphaproteobacteria	GTAGTCCACGCCGTAAACGATGGATGCTAGCCGTCGGGGAGCTTGCTCTTCGGTGGCGCAGCTAACGTATTAAGCATCCCGCCTGGGGAGTACGGTCGCAAGATTAAAACTCAAAGGAATTGACGGGGGCCCGCACAAGCGGTGGAGCATGTGGTTTAATTCGAGGCAACGCGAAGAACCTTACCAGCTCTTGACATCCCTGGAACCCTAGCAGAGATGCATGGGGGTGCCGCAAGGAACCAGGAGACAGGTGCTGCATGGCTGTCGTCAGCTCGTGTCGTGAGATGTTGGGTTAAGTCCCGCAAC	128	0	82	148	0	0	0	91	88	251	0	96	0	279	165	0	0	0	0	66	195	125	0	0	188	0	0	0	90	831	163	594	0	30	215	89	0	0	111	380	226	57	189	172	184	0
0a4c44d170d88c0459c8815728a5a92f	bASV635	d__Bacteria; p__Actinobacteriota; c__Actinobacteria; o__Frankiales; f__Acidothermaceae; g__Acidothermus; s__uncultured_soil	GTAGTCCACGCCGTAAACGTTGGGCGCTAGGTGTGGGATCCTTCCACGGATTCCGTGCCGCAGCTAACGCATTAAGCGCCCCGCCTGGGGAGTACGGCCGCAAGGCTAAAACTCAAAGGAATTGACGGGGGCCCGCACAAGCGGCGGAGCATGTTGCTTAATTCGACGCAACGCGAAGAACCTTACCAAGGTTTGACATGCAGGGAAAAGCCGTAGAGATATGGTGTCCGTAAGGGTCCTGCACAGGTGGTGCATGGCTGTCGTCAGCTCGTGTCGTGAGATGTTGGGTTAAGTCCCGCAACGAGC	0	0	0	1436	0	260	0	486	329	0	0	0	102	0	0	0	0	0	0	0	0	216	798	653	0	0	0	0	0	0	0	0	0	0	0	0	0	0	0	0	0	0	0	0	0	0
e72e98e360f21d5e898f18ef8aa7251e	bASV636	d__Bacteria; p__Proteobacteria; c__Alphaproteobacteria; o__Sphingomonadales; f__Sphingomonadaceae; g__Sphingomonas	GTAGTCCACGCTGTAAACGATGATGACTAGCTGTCGGGGCGCTTAGCGTTCCGGTGGCGCAGCTAACGCGTTAAGTCATCCGCCTGGGGAGTACGGCCGCAAGGTTAAAACTCAAAGAAATTGACGGGGGCCTGCACAAGCGGTGGAGCATGTGGTTTAATTCGAAGCAACGCGCAGAACCTTACCAGCGTTTGACATGCCAGGACGGTTTCCAGAGATGGATTCCTTCCCTTACGGGACCTGGACACAGGTGCTGCATGGCTGTCGTCAGCTCGTGTCGTGAGATGTTGGGTTAAGTCCCGCAAC	0	0	0	0	0	0	0	0	0	0	0	0	0	0	0	0	0	113	0	0	0	0	1636	417	0	0	0	0	260	0	211	80	0	0	0	0	524	350	0	0	0	787	481	1026	0	0
36e164d193da0002cd6f51a98a5a5677	bASV637	d__Bacteria; p__Actinobacteriota; c__Actinobacteria; o__Propionibacteriales; f__Nocardioidaceae; g__Aeromicrobium; s__uncultured_Nocardioidaceae	GTAGTCCATGCCGTAAACGTTGGGCGCTAGGTGTGGGGTCCTTCCACGGATTCCGTGCCGCAGCTAACGCATTAAGCGCCCCGCCTGGGGAGTACGGCCGCAAGGCTAAAACTCAAAGGAATTGACGGGGGCCCGCACAAGCGGCGGAGCATGCTGATTAATTCGATGCAACGCGAAGAACCTTACCTAGGTTTGACATATAGAGAAAACTTATAGAGATATAAGGTCCTTTTGGGCTCTATACAGGTGGTGCATGGCTGTCGTCAGCTCGTGTCGTGAGATGTTGGGTTAAGTCCCGCAACGAGC	111	154	172	38	0	37	0	30	47	119	0	60	72	213	0	0	0	165	0	0	0	28	0	11	43	223	0	0	19	0	0	26	114	43	58	171	0	0	240	313	264	82	407	327	351	102
125ad0fd17774d7cbf6f4ea722c76bce	bASV638	d__Bacteria; p__Myxococcota; c__Myxococcia; o__Myxococcales; f__Myxococcaceae	GTAGTCCACGCCGTAAACGATGAGAACTAGGTGTCGTGGGTGTTGACCCCCGCGGTGCCGTAGCTAACGCATTAAGTTCTCCGCCTGGGAAGTACGGCCGCAAGGCTAAAACTCAAAGGAATTGACGGGGGCCCGCACAAGCGGTGGAGCATGTGGTTTAATTCGACGCAACGCGCAGAACCTTACCTGGTCTTGACATCCTCGGAACCTGCCAGAGATGGCGGGGTGCCCGCAAGGGAACCGAGAGACAGGTGCTGCATGGCTGTCGTCAGCTCGTGTCGTGAGATGTTGGGTTAAGTCCCGCAA	273	0	275	0	0	249	0	298	0	0	0	173	147	195	0	0	0	272	0	117	0	214	284	0	0	0	175	0	244	0	186	248	0	0	176	0	0	0	190	357	286	170	321	274	124	163
9519e0c0823607d1c9cbd45052cc5dc0	bASV639	d__Bacteria; p__Proteobacteria; c__Alphaproteobacteria; o__Rhizobiales; f__Beijerinckiaceae; g__Bosea	GTAGTCCACGCCGTAAACGATGAATGCCAGCCGTTGGGGAGCTTGCTCTTCAGTGGCGCAGCTAACGCTTTAAGCATTCCGCCTGGGGAGTACGGTCGCAAGATTAAAACTCAAAGGAATTGACGGGGGCCCGCACAAGCGGTGGAGCATGTGGTTTAATTCGAAGCAACGCGCAGAACCTTACCAGCTTTTGACATGTCCGGTTTGATCGGCAGAGATGCCTTTCTTCAGTTCGGCTGGCCGGAACACAGGTGCTGCATGGCTGTCGTCAGCTCGTGTCGTGAGATGTTGGGTTAAGTCCCGCAA	63	0	112	107	0	85	56	119	0	0	0	0	0	0	229	0	0	86	0	300	61	0	58	110	0	0	0	0	66	0	0	0	0	0	1056	0	380	44	0	0	0	0	0	0	157	35
a8e2dd15c00a82adbdbcff3bd12ea4df	bASV640	d__Bacteria; p__Proteobacteria; c__Alphaproteobacteria; o__Rhizobiales; f__Xanthobacteraceae; g__Xanthobacteraceae; s__uncultured_bacterium	GTAGTCCACGCCGTAAACGATGGAAGCTAGCCGTTGGTAAGCATGCTTATCAGTGGCGCAGCTAACGCATTAAGCTTCCCGCCTGGGGAGTACGGTCGCAAGATTAAAACTCAAAGGAATTGACGGGGGCCCGCACAAGCGGTGGAGCATGTGGTTCAATTCGACGCAACGCGAAGAACCTTACCAGCCCTTGACATGTCCAGGACCGGTCGCAGAGACGCGACCTTCTCTTCGGAGCTTGGAACACAGGTGCTGCATGGCTGTCGTCAGCTCGTGTCGTGAGATGTTGGGTTAAGTCCCGCAACG	0	70	58	22	0	85	0	50	17	70	209	0	9	320	91	19	116	79	0	75	67	99	0	0	76	80	0	0	0	127	17	36	93	0	88	0	0	0	0	0	0	0	0	0	0	14
270958ea9e9a0056db0f0efdb316da4b	bASV641	d__Bacteria; p__Proteobacteria; c__Gammaproteobacteria	GTAGTCCACGCCGGAGCTAACGCGTTAAGTCGACCGCCTGGGGAGTACGGCCTAAACGATGTCGACTTGGAGGTTGTGCCCTTGAGGCGTGGCTTCCGGCAAGGTTAAAACTCAAATGAATTGACGGGGGCCCGCACAAGCGGTGGAGCATGTGGTTTAATTCGATGCAACGCGAAGGAACCGTGAGACAGGTGCTGCATGGCTGTCGTCAGCTCGTGTTGTGAAATGTTGGGTTAAGTCCCGTAACGAGCGCAACCCTTGTCCTTAGTTACCAGCACGTTATGGTGGGCACTCTAAGGAGACTGC	195	0	0	0	0	0	0	0	0	0	0	160	0	0	121	62	0	0	0	139	43	101	0	64	0	0	94	0	202	0	113	0	222	0	0	404	0	67	0	0	0	75	0	0	181	48
9e6171ccd5c554aac5d299b306efbf83	bASV642	d__Bacteria; p__Acidobacteriota; c__Subgroup_5; o__Subgroup_5; f__Subgroup_5; g__Subgroup_5; s__uncultured_Truepera	GTAGTCCTAGCCCTAAACGATGGATACTTGGTGTGACCGGGATTGAATCCGGTCGTGCCGAAGCTAACGCATTAAGTATCCCGCCTGGGGAGTACGGTCGCAAGGCTGAAACTCAAAGGAATTGACGGGGGCCCGCACAAGCGGTGGAGTATGTGGTTTAATTCGACGCAACGCGAAGAACCTTACCTGGGCTCGAACGGCTAGTGACAGGTGGCGAAAGTCGCTTTTCCCGCAAGGGACACTAGTCGAGGTGCTGCATGGCTGTCGTCAGCTCGTGTCGTGAGATGTTGGGTTAAGTCCCGCAAC	0	0	0	284	0	224	0	236	78	0	0	0	863	0	0	0	0	329	0	0	0	121	159	67	0	0	0	0	0	0	0	0	0	0	0	0	0	0	0	0	0	42	0	54	0	84
09e83edbf7587a51d2be6d22627b302d	bASV643	d__Bacteria; p__Proteobacteria; c__Gammaproteobacteria; o__Burkholderiales; f__Burkholderiaceae; g__Burkholderia-Caballeronia-Paraburkholderia	GTAGTCCACGCCCTAAACGATGTCAACTAGTTGTTGGGGATTCATTTCCTTAGTAACGTAGCTAACGCGTGAAGTTGACCGCCTGGGGAGTACGGTCGCAAGATTAAAACTCAAAGGAATTGACGGGGACCCGCACAAGCGGTGGATGATGTGGATTAATTCGATGCAACGCGAAAAACCTTACCTACCCTTGACATGGTCGGAATCCTGCTGAGAGGCGGGAGTGCTCGAAAGAGAACCGATACACAGGTGCTGCATGGCTGTCGTCAGCTCGTGTCGTGAGATGTTGGGTTAAGTCCCGCAACG	0	0	0	0	0	257	0	0	0	0	0	0	0	0	0	0	0	23	47	0	0	80	30	0	0	0	0	0	0	0	0	0	0	0	0	0	258	0	0	0	0	0	0	0	0	0
c29d452f926cdf93d2b71a7e1bb60546	bASV644	d__Bacteria; p__Actinobacteriota; c__MB-A2-108; o__MB-A2-108; f__MB-A2-108; g__MB-A2-108	GTAGTCCTAGCCGTAAACGTTGGGTACTAGGTGTGGGCGGTATCAACCCCGTCCGTGCCGAAGCTAACGCATTAAGTACCCCGCCTGGGGAGTACGGCCGCAAGGCTAAAACTCAAAGGAATTGACGGGGGCCCGCACAAGCGGCGGAGCATGTGGCTTAATTCGACGCAACGCGAAGAACCTTACCTGGGCTTGACATGCGGGGTGAACGCTGTGAAAGCAGCTGCTCTTCGGAGCCCGCACAGGTGGTGCATGGCTGTCGTCAGCTCGTGCCGTGAGGTGTTGCCTTAAGTGGCGCAACGAGCG	95	25	110	0	627	224	63	0	0	0	0	24	558	471	338	0	0	0	127	0	0	0	264	0	0	0	209	153	829	916	280	294	0	0	157	645	6	0	0	0	0	312	471	836	0	127
14fbf5d8e920aa79fb017e09f9e3a779	bASV645	d__Bacteria; p__Proteobacteria; c__Alphaproteobacteria; o__Rhizobiales; f__Xanthobacteraceae; g__Bradyrhizobium	GTAGTCCACGCCGTAAACGATGAATGCCAGCCGTTAGTGGGTTTACTCACTAGTGGCGCAGCTAACGCTTTAAGCATTCCGCCTGGGGAGTACGGTCGCAAGATTAAAACTCAAAGGAATTGACGGGGGCCCGCACAAGCGGTGGAGCATGTGGTTTAATTCGACGCAACGCGCAGAACCTTACCAGCCCTTGACATGTCCAGGACCGGTCGCAGAGATGTGACCCTCTCTTCGGAGCCTGGAGCACAGGTGCTGCATGGCTGTCGTCAGCTCGTGTCGTGAGATGTTGGGTTAAGTCCCGCAACG	0	0	0	0	0	194	49	78	0	75	0	0	135	0	115	0	0	144	0	0	0	114	440	0	0	0	0	0	110	0	0	0	0	0	26435	0	174	125	76	189	136	0	63	111	0	0
c13d52ae5474c7acd4f84c2970b0e6bf	bASV646	d__Bacteria; p__Chloroflexi; c__Ktedonobacteria; o__C0119; f__C0119; g__C0119; s__uncultured_bacterium	TTAGTCCTAGCAGTAAACGATGGCTACTAGGTGTGGGGGGTGTTGACCCCTCCTGTGCCGAAGCTAACGCATTAAGTAGCCCGCCTGGGGAGTACGGTCGCAAGACTAAAACTCAAAGGAATTGACGGGGACCCGCACAAGCAGCGGAGCGTGTGGTTTAATTCGATGCAACGCGAAGAACCTTACCTGGGCTTGACATACACTCGCAACCCTCCGAAAGGGGGGCCTCCTTCGGGACGGGTGTACAGATGTTGCATGGCTGTCGTCAGCTCGTGTCGTGAGATGTTGGGTTAAGTCCCGCAACGA	149	79	509	141	0	15	49	336	0	0	0	58	27	0	0	0	198	127	103	0	92	263	0	0	61	220	0	0	110	115	18	37	101	0	396	0	8	0	37	323	149	46	91	179	0	0
02de91e5b832f82d6b7d4965690b40e0	bASV649	d__Bacteria; p__Bacteroidota; c__Bacteroidia; o__Chitinophagales; f__Chitinophagaceae; g__Terrimonas	GTAGTCCACGCCCTAAACTATGGATACTCGACATACGCGATACACTGTGTGTGTCTGAGCGAAAGCATTAAGTATCCCACCTGGGAAGTACGATCGCAAGATTGAAACTCAAAGGAATTGGCGGGGGTCCGCACAAGCGGTGGAGCATGTGGTTTAATTCGATGATACGCGAGGAACCTTACCTGGGCTAGAATGCTGGGAGACCGTGGGTGAAAGCTCACTTTGTAGCAATACACTGCCAGTAAGGTGCTGCATGGCTGTCGTCAGCTCGTGCCGTGAGGTGTTGGGTTAAGTCCCGCAACGAGC	0	0	0	255	0	0	0	446	145	84	393	0	0	0	350	0	397	0	0	0	210	393	0	0	548	0	176	0	423	651	0	81	0	0	0	0	0	0	0	164	0	75	0	67	0	289
df9e86996c4dc86f4ea60253c192a0be	bASV650	d__Bacteria; p__Chloroflexi; c__AD3; o__AD3; f__AD3; g__AD3; s__uncultured_bacterium	GTAGTCCACGCCCTAAACGTTGCGAACTAGGTGTTGGTCGGATTGACCCGATCAGTGCCGCAGCTAACGCATTAAGTTCGCCGCCTGGGGACTACGGCCGCAAGGTTAAAACTCAAAGGAATAGGCGGGGGCCCGCACAAGCAGCGGAGCGTGTGGTTTAATTCGAGGCGACGCGAAGAACCTTACCTGGGTTTGACATGTAGAGGAAACGTTGGTGAAAGCCAGCGCCCCTCGCAAGAGGTCTCTACACAGGTGGTGCATGGCTGTCGTCAGCTCGTGCCGTGAGGTGTTGGGTTAAGTCCCGCA	0	0	0	18	0	124	55	34	23	0	0	0	235	0	0	0	0	27	85	0	0	55	27	62	0	0	17	0	0	0	40	0	0	0	0	0	0	0	0	0	0	0	0	0	0	0
50bb509eab18c6a7704c6052aecfe704	bASV651	d__Bacteria; p__Acidobacteriota; c__Thermoanaerobaculia; o__Thermoanaerobaculales; f__Thermoanaerobaculaceae; g__Subgroup_10	GTAGTCCACGCTGTAAACGATGGGTGCTCGGTGTCGCGGGTATCGACCCCTGCGGTGCCTTAGCTAACGCGTTAAGCACCCCGCCTGGGGAGTACGGTCGCAAGGCTGAAACTCAAAGGAATTGACGGGGGCCCGCACAAGCGGTGGAGCATGTGGTTTAATTCGATGCAACGCGAAGAACCTTACCTGGGCTTGAACTGTGGTGGACCGTCCTGGAAACAGGGCTTCTCCTTCGGGAGCCGCCATAGAGGTGCTGCATGGCTGTCGTCAGCTCGTGTCGTGAGATGTTGGGTTAAGTCCCGCAAC	111	0	504	0	0	0	0	0	0	0	0	0	0	0	398	0	0	94	0	0	0	99	0	0	121	0	0	0	96	626	108	100	0	0	304	0	0	0	0	1363	285	23	0	288	0	0
1429794548118d6be9e9ea1fcf5a03af	bASV652	d__Bacteria; p__Actinobacteriota; c__Actinobacteria; o__Corynebacteriales; f__Nocardiaceae; g__Nocardia	GTAGTCCACGCCGTAAACGGTGGGTACTAGGTGTGGGTTTCCTTCCACGGGATCCGTGCCGTAGCTAACGCATTAAGTACCCCGCCTGGGGAGTACGGCCGCAAGGCTAAAACTCAAAGGAATTGACGGGGGCCCGCACAAGCGGCGGAGCATGTGGATTAATTCGATGCAACGCGAAGAACCTTACCTGGGTTTGACATACACCGGAAACCTGCAGAGATGTAGGCCCCCTTGTGGTCGGTGTACAGGTGGTGCATGGCTGTCGTCAGCTCGTGTCGTGAGATGTTGGGTTAAGTCCCGCAACGA	175	71	85	634	0	0	134	1076	501	165	135	98	130	183	86	0	0	144	63	119	212	223	0	0	237	0	0	0	54	0	22	31	0	146	0	0	0	0	0	0	73	55	49	105	117	59
4ef2a478e8161c520e53286d7e6b1e7c	bASV653	d__Bacteria; p__Actinobacteriota; c__Actinobacteria; o__PeM15; f__PeM15; g__PeM15; s__uncultured_soil	GTAGTCCACGCCGTAAACGGTGGGCACTAGGTGTGGGGACCATTCCACGGTCTCTGCGCCGCAGCTAACGCATTAAGTGCCCCGCCTGGGGAGTACGGCCGCAAGGCTAAAACTCAAAGGAATTGACGGGGGCCCGCACAAGCGGCGGAGCATGCGGCTTAATTCGAAGCAACGCGAAGAACCTTACCTAGGCTTGACATGCAGGGAAATCTGGCAGAGATGCCAGGTCCTTCGGGGCCTTGCACAGGTGGTGCATGGCTGTCGTCAGCTCGTGTCGTGAGATGTTGGGTTAAGTCCCGCAACGAG	2697	210	795	56	0	87	0	88	20	405	43	521	104	131	628	0	0	0	0	10	34	105	156	43	32	232	231	328	1740	259	75	106	0	0	339	403	0	0	590	1568	933	136	155	192	25	80
b3b44863be9e87904fcccc189e407b0a	bASV654	d__Bacteria; p__Firmicutes; c__Bacilli; o__Bacillales; f__Bacillaceae; g__Bacillus	GTAGTCCACGCCGTAAACGATGAGTGCTAAGTGTTAGAGGGTTTCCGCCCTTTAGTGCTGCAGCTAACGCATTAAGCACTCCGCCTGGGGAGTACGGCCGCAAGGCTGAAACTCAAAGGAATTGACGGGGGCCCGCACAAGCGGTGGAGCATGTGGTTTAATTCGAAGCAACGCGAAGAACCTTACCAGGTCTTGACATCCTTTTGCCCTCCCTAGAGATAGGGATTTCCCTTCGGGGACAAAAGTGACAGGTGGTGCATGGTTGTCGTCAGCTCGTGTCGTGAGATGTTGGGTTAAGTCCCGCAA	50	0	255	1624	0	142	0	1810	2145	178	137	52	248	68	189	0	0	314	64	920	222	87	0	0	415	0	0	0	0	0	0	0	40	105	0	0	0	0	0	29	0	36	24	0	717	138
92295c8766db7fd0a6bbaec36784461a	bASV655	d__Bacteria; p__Actinobacteriota; c__Acidimicrobiia	GTAGTCCACGCCGTAAACGTTGGGCACTAGGTGTGGGGTTCTATCGACGGATTCCGTGCCGTAGCTAACGCATTAAGTGCCCCGCCTGGGGAGTACGGCCGCAAGGCTAAAACTCAAAGGAATTGACGGGGGCCCGCACAAGCGGCGGAGCATGTGGCTTAATTCGATGCGACGCGAAGAACCTTACCTGGGTTTGACATGTAGGGAAAAGCCGTAGAGATACGGTGTCCTTCGGGGTCCTACACAGGTGGTGCATGGCTGTCGTCAGCTCGTGTCGTGAGATGTTGGGTTAAGTCCCGCAACGAG	0	0	0	0	1288	130	0	0	0	0	0	0	216	114	0	0	0	0	0	0	0	0	1675	535	0	0	235	257	558	0	150	0	0	0	0	332	180	0	0	0	0	79	161	130	0	46
3f7187456b441a5fb4389c6bc928dc99	bASV656	d__Bacteria; p__Proteobacteria; c__Alphaproteobacteria; o__Rhizobiales; f__Xanthobacteraceae	GTAGTCCACGCCGTAAACGATGAATGCTAGCCGTTGGGGGGTTTACTCTTCAGTGGCGCAGCTAACGCTTTAAGCATTCCGCCTGGGGAGTACGGTCGCAAGATTAAAACTCAAAGGAATTGACGGGGGCCCGCACAAGCGGTGGAGCATGTGGTTTAATTCGACGCAACGCGCAGAACCTTACCAGCCCTTGACATGTCCCGTATGGGTTTCAGAGATGAGATCCTTCAGTTCGGCTGGCGGGAACACAGGTGCTGCATGGCTGTCGTCAGCTCGTGTCGTGAGATGTTGGGTTAAGTCCCGCAA	0	0	0	197	476	133	0	332	43	43	80	0	94	0	0	0	546	0	0	44	127	100	50	227	92	0	0	0	0	0	0	0	0	0	0	0	370	183	0	0	0	0	0	0	0	0
fd250b3f6be95b13848dcaf772279616	bASV657	d__Bacteria; p__Actinobacteriota; c__Acidimicrobiia; o__Microtrichales; f__Microtrichaceae; g__uncultured	GTAGTCCACGCCGTAAACGGTGGGCACTAGGTGTGGGATTCACTCAACGGATTCCGTGCCGCAGCTAACGCATTAAGTGCCCCGCCTGGGGAGTACGGCCGCAAGGCTAAAACTCAAAGGAATTGACGGGGGCCCGCACAAGCGGCGGAGCATGTTGCTTAATTCGAGGCAACGCGAAGAACCTTACCTAGGTTTGACATGTACGGAAAAGCTACAGAGATGTGGTGTCCTTCGGGGCCGTACACAGGTGGTGCATGGCTGTCGTCAGCTCGTGTCGTGAGATGTTGGGTTAAGTCCCGCAACGAG	113	0	123	125	271	107	32	269	120	252	124	128	304	75	104	0	199	638	53	50	278	135	118	0	171	292	47	52	322	243	67	216	117	152	138	159	13	12	84	176	229	163	402	552	488	109
df3befb975895c933b29f7b1e0ebd8af	bASV658	d__Bacteria; p__Acidobacteriota; c__Subgroup_5; o__Subgroup_5; f__Subgroup_5; g__Subgroup_5; s__uncultured_Truepera	GTAGTCCTAGCCCTAAACGATGGATACTTGGTGTGACGGGGATTGAATCCCGTCGTGCCGAAGCTAACGCATTAAGTATCCCGCCTGGGGAGTACGGTCGCAAGGCTGAAACTCAAAGGAATTGACGGGGGCCCGCACAAGCGGTGGAGTATGTGGTTTAATTCGACGCAACGCGAAGAACCTTACCTGGGCTCGAACGGCTAGTGACAGGTGGCGAAAGTCGCTTTTCCCGCAAGGGACACTAGTCGAGGTGCTGCATGGCTGTCGTCAGCTCGTGTCGTGAGATGTTGGGTTAAGTCCCGCAAC	0	0	0	662	0	382	98	618	346	169	0	0	778	79	0	0	0	879	329	199	288	277	333	87	421	0	0	0	221	0	0	0	0	202	0	0	76	0	46	0	90	89	169	283	580	143
eb02b0e3c7128e9dd977013fa8fb4c39	bASV659	d__Bacteria; p__Acidobacteriota; c__Acidobacteriae; o__Acidobacteriales; f__uncultured; g__uncultured	GTAGTCCTAGCCCTAAACGATGATTGCTTGGTGTAGCCGGTACCCAATCCGGCTGTGCCGAAGCTAACGCGATAAGCAATCCGCCTGGGGAGTACGGTCGCAAGGCTGAAACTCAAAGGAATTGACGGGGGCCCGCACAAGCGGTGGAGCATGTGGTTCAATTCGACGCAACGCGAAGAACCTTACCTGGGCTCGAAATGCAGTGGACCGGGGTAGAAATATCCCTTTCCGCAAGGACTGCTGCATAGGTGCTGCATGGCTGTCGTCAGCTCGTGTCGTGAGATGTTGGGTTAAGTCCCGCAACGA	0	0	0	858	675	591	49	1192	580	246	93	0	3505	137	0	0	508	1179	82	120	355	539	111	0	340	248	0	29	1095	0	0	0	170	106	0	192	90	0	0	0	0	0	0	0	0	32
2766610d7c1c19ebf86d9047636e3da4	bASV660	d__Bacteria; p__Verrucomicrobiota; c__Verrucomicrobiae; o__Pedosphaerales; f__Pedosphaeraceae; g__Pedosphaeraceae	GTAGTCCTAGCCCTAAACGGTGCGTGTTTGCTGTAAAAGGAATCGACCCCTTTTGTGGCGAAGCTAACGCGTTAAACACGCCGCCTGGGGAGTACGGTCGCAAGATTAAAACTCAAAGAAATTGACGGGGGCCTGCACAAGCGGTGGAGTATGTGGCTTAATTCGATGCAACGCGAAGAACCTTACCTGGCCTTGACATGCAAGTGGTAGAACCATGAAAGTGGGACGATCCCGCAAGGGAAGCTTGCACAGGTGCTGCATGGCTGTCGTCAGCTCGTGTCGTGAGATGTTGGGTTAAGTCCCGCA	0	0	0	176	0	246	0	144	100	83	83	0	860	0	0	0	0	113	0	48	0	0	386	53	0	368	167	165	403	0	69	90	0	0	76	0	777	149	0	0	0	159	181	269	0	38
d7ce04254ab447a5a1dd42627449a819	bASV661	d__Bacteria; p__Proteobacteria; c__Alphaproteobacteria; o__Sphingomonadales; f__Sphingomonadaceae; g__Blastomonas; s__Blastomonas_natatoria	GTAGTCCACGCCGTAAACGATGATAACTAGCTGTCCGGGTTCATGGAACTTGGGTGGCGCAGCTAACGCATTAAGTTATCCGCCTGGGGAGTACGGTCGCAAGATTAAAACTCAAAGGAATTGACGGGGGCCTGCACAAGCGGTGGAGCATGTGGTTTAATTCGAAGCAACGCGCAGAACCTTACCAGCGTTTGACATGTCTAGTATGTTTCCCAGAGATGGGTTACTTCAGTTCGGCTGGCTAGAACACAGGTGCTGCATGGCTGTCGTCAGCTCGTGTCGTGAGATGTTGGGTTAAGTCCCGCA	0	0	0	0	0	0	0	0	0	0	0	0	0	0	0	0	0	0	0	0	0	0	111	0	16	73	0	0	101	161	31	0	0	0	0	0	0	0	0	0	0	0	81	0	0	0
b5b69d0b7f5439828951e47827835179	bASV662	d__Bacteria; p__Verrucomicrobiota; c__Verrucomicrobiae; o__Pedosphaerales; f__Pedosphaeraceae; g__ADurb.Bin063-1	GTAGTCCTAGCCGTAAACGGTGCACGTTTGCTGTAAAAGGAATCGACCCCTTTTGTGGCGGAGCCAACGCGTTAAACGTGCCGCCTGGGAAGTACGGTCGCAAGATTAAAACTCAAAGAAATTGACGGGGGCCTGCACAAGCGGTGGAGTATGTGGCTCAATTCGATGCAACGCGAAGAACCTTACCTGGCCTTGACATGCATATAGTAGAAGGGTGAAAGCCTGACGAGGTAGCAATACCAGTATGCACAGGTGCTGCATGGCTGTCGTCAGCTCGTGTCGTGAGATGTTGGGTTAAGTCCCGCA	0	0	0	302	899	498	0	222	123	0	0	0	631	0	0	0	0	0	0	96	138	68	404	87	0	0	0	0	150	0	0	0	0	0	0	0	939	224	0	0	0	0	0	0	0	0
caadce65e9078db6fd8ff68026224b8c	bASV663	d__Bacteria; p__Proteobacteria; c__Gammaproteobacteria; o__Cellvibrionales; f__Halieaceae; g__OM60(NOR5)_clade; s__metagenome	GTAGTCCACGCCGTAAACGATGTCTACTAGCCGTTGGGAGACTTGATTTCTTAGTGGCGCAGCTAACGCAATAAGTAGACCGCCTGGGGAGTACGGCCGCAAGGTTAAAACTCAAATGAATTGACGGGGGCCCGCACAAGCGGTGGAGCATGTGGTTTAATTCGATGCAACGCGAAGAACCTTACCAGGTCTTGACATCCAGAGAACTTTCCAGAGATGGATTGGTGCCTTCGGGAGCTCTGAGACAGGTGCTGCATGGCTGTCGTCAGCTCGTGTCGTGAGATGTTGGGTTAAGTCCCGTAACGA	340	0	105	0	0	120	0	85	39	73	48	152	171	189	0	0	0	118	0	55	55	111	63	21	92	0	59	0	110	0	62	110	103	61	133	0	46	7	39	151	53	99	124	144	66	204
5269967f14c3e0c5285c3188839a95fc	bASV664	d__Bacteria; p__Proteobacteria; c__Gammaproteobacteria; o__JG36-TzT-191; f__JG36-TzT-191; g__JG36-TzT-191; s__uncultured_bacterium	GTAGTCCACGCCTTAAACGATGAGAACTAGACGTTGAGAGGGTTAGCCTCCCAGTGTCGCAGCTAACGCGCTAAGTTCTCCGCCTGGGGAGTACGGCCGCAAGGTTGAAACTCAAAGGAATTGACGGGGACCCGCACAAGCGGTGGAGCATGTGGTTTAATTCGATGCAACGCGAAGAACCTTACCTGGCCTTGACATCCACGGAATTCTGCAGAGATGCGGAAGTGCCTTCGGGAACCGTGAGACAGGTGCTGCATGGCTGTCGTCAGCTCGTGTCGTGAGATGTTGGGTTAAGTCCCGCAACGA	0	0	0	793	310	1209	169	1156	254	99	103	0	911	0	0	0	0	214	200	89	192	270	580	24	171	503	0	0	0	0	0	0	0	0	0	0	42	15	0	0	0	0	0	0	0	0
77e4ba860950c8cfd0aa6bbc3ffd6d26	bASV665	d__Bacteria; p__Desulfobacterota; c__uncultured; o__uncultured; f__uncultured; g__uncultured; s__uncultured_bacterium	GTAGTCCACGCTGTAAACGATGAGCACTAGGTGTCGCGGGTATTGACCCCTGCGGTGCCGACGCTAACGCATTAAGTGCTCCGCCTGGGGAGTACGGTCGCAAGATTAAAACTCAAAGGAATTGACGGGGGCCCGCACAAGCGGTGGAGCATGTGGTTCAATTCGACGCAACGCGCAGAACCTTACCCGGGCTAGACAACGGTGGACCGCCCCAGAGATGGGGCTTTTCCTTCGGGAACCGCCGGTTCAGGTGCTGCATGGCTGTCGTCAGCTCGTGTCGTGAGATGTTGGGTTAAGTCCCGCAAC	279	46	221	134	167	331	18	186	76	120	113	78	612	250	105	0	0	1037	41	82	168	87	357	0	187	88	140	149	947	123	90	98	211	194	153	79	6	0	82	172	112	46	98	101	505	261
30f0dbbf74f506a522a73c1ab97a1d9b	bASV668	d__Bacteria; p__Proteobacteria; c__Alphaproteobacteria; o__Sphingomonadales; f__Sphingomonadaceae; g__Sphingobium	GTAGTCCACGCCGTAAACGATGATAACTAGCTGCCGGGGCACATGGTGTTTCGGTGGCGCAGCTAACGCATTAAGTTATCCGCCTGGGGAGTACGGTCGCAAGATTAAAACTCAAAGGAATTGACGGGGGCCTGCACAAGCGGTGGAGCATGTGGTTTAATTCGAAGCAACGCGCAGAACCTTACCAACGTTTGACATCCTCATCGCGATTTCCAGAGATGGATTTCTTCAGTTCGGCTGGATGAGTGACAGGTGCTGCATGGCTGTCGTCAGCTCGTGTCGTGAGATGTTGGGTTAAGTCCCGCA	84	49	112	29	0	0	0	188	0	0	0	75	0	75	1469	0	0	23	0	56	39	42	60	17	0	0	240	92	261	0	0	0	45	0	42	0	118	0	42	16	26	0	0	0	0	18
9f968c78155aeee1f83ab6150c1d0f8f	bASV671	d__Bacteria; p__Chloroflexi; c__AD3; o__AD3; f__AD3; g__AD3; s__uncultured_bacterium	GTAGTCCACGCCCTAAACGTTGCGAACTAGGTGTTGGTCGGATTGACCCGATCAGTGCCGCAGCTAACGCATTAAGTTCGCCGCCTGGGGACTACGGCCGCAAGGTTAAAACTCAAAGGAATAGGCGGGGGCCCGCACAAGCAGCGGAGCGTGTGGTTTAATTCGAGGCAACGCGAAGAACCTTACCTGGGCTTGACATGTAGAGGAAACGTTGGTGAAAGCCAGCGCCCCTCGCAAGAGGTCTCTACACAGGTGGTGCATGGCTGTCGTCAGCTCGTGCCGTGAGGTGTTGGGTTAAGTCCCGCA	0	0	0	0	0	242	216	0	0	0	0	0	249	64	0	0	0	53	438	0	80	0	77	0	0	0	0	0	0	0	0	0	0	0	0	0	0	0	0	0	0	0	0	0	0	71
4bc5b844ed04f320dabc60c6e3520ad0	bASV672	d__Bacteria; p__Acidobacteriota; c__Acidobacteriae; o__Acidobacteriales; f__Acidobacteriaceae_(Subgroup_1)	GTAGTCCTAGCCCTAAACGATGATTGCTTGGTGTGGCAGGTACCCAATCCTGCCGTGCCGAAGCTAACGCGATAAGCAATCCGCCTGGGGAGTACGGTCGCAAGGCTGAAACTCAAAGGAATTGACGGGGGCCCGCACAAGCGGTGGAGCATGTGGTTTAATTCGACGCAACGCGAAGAACCTTACCTGGGCTCGAAATGTAGTGGAATCCGGCAGAAACGTCGGCGTCTAGCAATAGACCGCTATATAGGTGCTGCATGGCTGTCGTCAGCTCGTGTCGTGAGATGTTGGGTTAAGTCCCGCAAC	0	0	0	0	0	132	0	0	0	0	0	0	26	0	0	0	0	0	80	0	0	98	19	0	0	0	0	0	0	0	0	0	0	0	0	0	58	17	0	0	0	0	0	0	0	0
7d1ea5ecb8395fad18356fc9b95338a2	bASV674	d__Bacteria; p__Firmicutes; c__Bacilli; o__Bacillales; f__Bacillaceae; g__Bacillus	GTAGTCCACGCCGTAAACGATGAGTGCTAAGTGTTAGAGGGTTTCCGCCCTTTAGTGCTGCAGCTAACGCATTAAGCACTCCGCCTGGGGAGTACGGCCGCAAGGCTGAAACTCAAAGGAATTGACGGGGGCCCGCACAAGCGGTGGAGCATGTGGTTTAATTCGAAGCAACGCGAAGAACCTTACCAGGTCTTGACATCCTCTGACACTCCTAGAGATAGGAATTTCCCCTTCGGGGGACAGAGTGACAGGTGGTGCATGGTTGTCGTCAGCTCGTGTCGTGAGATGTTGGGTTAAGTCCCGCAA	181	0	479	192	0	156	0	155	158	0	0	79	194	0	225	0	0	250	0	91	180	0	0	0	265	0	0	0	92	0	0	0	0	0	78	0	0	0	0	0	0	62	79	64	1143	50
40e3904693f57389087c337972c6f611	bASV675	d__Bacteria; p__Proteobacteria; c__Alphaproteobacteria; o__Rhizobiales; f__Rhizobiaceae	GTAGTCCACGCCGTAAACGATGAATGTTAGCCGTCGGCATGCATGCATGTCGGTGGCGCAGCTAACGCATTAAACATTCCGCCTGGGGAGTACGGTCGCAAGATTAAAACTCAAAGGAATTGACGGGGGCCCGCACAAGCGGTGGAGCATGTGGTTTAATTCGAAGCAACGCGCAGAACCTTACCAGCCCTTGACATGCCGGTCGCGGACAGTGGAGACATTGTCCTTCAGTTAGGCTGGACCGGACACAGGTGCTGCATGGCTGTCGTCAGCTCGTGTCGTGAGATGTTGGGTTAAGTCCCGCAA	57	71	87	0	0	0	0	60	27	199	47	39	25	93	61	0	0	306	0	81	57	296	21	0	60	0	0	0	44	0	0	21	202	102	94	0	43	0	0	52	46	19	0	0	1661	42
221c31a813aae38aac1a2790d906fffe	bASV676	d__Bacteria; p__Proteobacteria; c__Gammaproteobacteria; o__Xanthomonadales; f__Rhodanobacteraceae	GTAGTCCACGCCCTAAACGATGCGAACTGGACGTTGGGTGCAACTTGGCACTCAGTGTCGAAGCTAACGCGTTAAGTTCGCCGCCTGGGGAGTACGGTCGCAAGACTGAAACTCAAAGGAATTGACGGGGGCCCGCACAAGCGGTGGAGTATGTGGTTTAATTCGATGCAACGCGCAGAACCTTACCTGGCCTTGACATGTCGCGAACCCTGCAGAGATGCGGGGGTGCCTTCGGGAATGCGAACACAGGTGCTGCATGGCTGTCGTCAGCTCGTGTCGTGAGATGTTGGGTTAAGTCCCGCAACG	0	0	0	43	1609	154	0	55	0	0	0	0	134	0	0	0	0	213	0	0	59	0	795	179	75	0	288	214	81	0	0	0	0	0	0	240	644	177	0	0	0	0	0	0	0	0
721e8c91669180974e2f64088b232bb3	bASV677	d__Bacteria; p__Proteobacteria; c__Alphaproteobacteria; o__Rhodobacterales; f__Rhodobacteraceae; g__Paracoccus	GTAGTCCACGCCGTAAACGATGAATGCCAGACGTCGGCAAGCATGCTTGTCGGTGTCACACCTAACGGATTAAGCATTCCGCCTGGGGAGTACGGTCGCAAGATTAAAACTCAAAGGAATTGACGGGGGCCCGCACAAGCGGTGGAGCATGTGGTTTAATTCGAAGCAACGCGCAGAACCTTACCAACCCTTGACATGGCAGGACCGCTGGAGAGATTCAGCTTTCTCGTAAGAGACCTGCACACAGGTGCTGCATGGCTGTCGTCAGCTCGTGTCGTGAGATGTTCGGTTAAGTCCGGCAACGAG	0	0	45	0	0	0	2572	118	47	0	0	0	52	0	0	0	123	5	0	31	19	26	15	62	39	0	202	0	81	61	29	25	7	0	0	0	164	4778	19	127	7797	0	2411	32	0	0
94c50937ea1e0e9aa084379e2f824f20	bASV678	d__Bacteria; p__Actinobacteriota; c__Actinobacteria; o__Streptomycetales; f__Streptomycetaceae; g__Kitasatospora	GTAGTCCACGCCGTAAACGTTGGGAACTAGGTGTTGGCGACATTCCACGTCGTCGGTGCCGCAGCTAACGCATTAAGTTCCCCGCCTGGGGAGTACGGCCGCAAGGCTAAAACTCAAAGGAATTGACGGGGGCCCGCACAAGCAGCGGAGCATGTGGCTTAATTCGACGCAACGCGAAGAACCTTACCAAGGCTTGACATACGCCGGAAACGTCCAGAGATGGGCGCCCCCTTGTGGTCGGTGTACAGGTGGTGCATGGTTGTCGTCAGCTCGTGTCGTGAGATGTTGGGTTAAGTCCCGCAACGA	112	0	664	161	0	320	56	173	99	147	0	51	247	117	0	0	0	97	0	41	74	175	249	61	66	0	157	170	543	0	56	31	0	160	72	0	240	32	0	72	51	44	39	55	180	68
a6821df533d6f04565b066002599ddaf	bASV679	d__Bacteria; p__Myxococcota; c__bacteriap25; o__bacteriap25; f__bacteriap25; g__bacteriap25	GTAGTCCACGCTGTAAACGATGGGCACTAGGTGTCCGGGGTATTGACCCCCTGGGTGCCGCAGCTAACGCATTAAGTGCCCCGCCTGGGGAGTACGGTCGCAAGATTAAAACTCAAAGGAATTGACGGGGGCCCGCACAAGCGGTGGAGCATGTGGTTCAATTCGACGCAACGCGAAGAACCTTACCTGGGCTAGACAACGGCGGACCGTCCTAGAAATAGGACTTTCCTTTCGGGGACCACCGGTTCAGGTGCTGCATGGCTGTCGTCAGCTCGTGCCGTGAGGTGTTGGGTTAAGTCCCGCAAC	0	0	0	776	0	276	183	1013	611	123	144	0	1203	149	0	0	520	478	77	126	307	501	0	0	412	500	0	0	0	0	0	0	306	497	0	0	0	0	0	0	0	0	0	0	0	763
0ca8a19485a644125c4648e44dc81c08	bASV680	d__Bacteria; p__Proteobacteria; c__Alphaproteobacteria; o__Rhizobiales; f__Rhizobiales_Incertae_Sedis; g__uncultured; s__uncultured_bacterium	GTAGTCCACGCCGTAAACTATGAGTGCTAGCCGTTGGCAAGCTTGCTTGTCAGTGGCGCAGCTAACGCATTAAGCACTCCGCCTGGGGAGTACGGTCGCAAGATTAAAACTCAAAGGAATTGACGGGGGCCCGCACAAGCGGTGGAGCATGTGGTTTAATTCGAAGCAACGCGCAGAACCTTACCTACCCTTGACATGTCTTGGATCGGTTTCAGAGATGAGACCTTCTCTTCGGAGCCAGGAACACAGGTGCTGCATGGCTGTCGTCAGCTCGTGTCGTGAGATGTTGGGTTAAGTCCCGCAACG	0	0	0	383	904	250	27	893	114	0	0	0	48	78	0	0	607	20	35	86	457	186	0	0	522	0	0	0	0	0	0	0	0	0	0	0	158	21	0	0	0	0	0	0	0	0
393a8fb31e18d342519c58c43ad7d168	bASV681	d__Bacteria; p__Actinobacteriota; c__Actinobacteria; o__Micrococcales; f__Micrococcaceae; g__Pseudarthrobacter	GTAGTCCATGCCGTAAACGTTGGGCACTAGGTGTGGGGGACATTCCACGTTTTCCGCGCCGTAGCTAACGCATTAAGTGCCCCGCCTGGGGAGTACGGCCGCAAGGCTAAAACTCAAAGGAATTGACGGGGGCCCGCACAAGCGGCGGAGCATGCGGATTAATTCGATGCAACGCGAAGAACCTTACCAAGGCTTGACATGAACCGGAAACGCCTGGAAACAGGTGCCCCACTTGTGGTCGGTTTACAGGTGGTGCATGGTTGTCGTCAGCTCGTGTCGTGAGATGTTGGGTTAAGTCCCGCAACG	1103	0	712	268	0	0	76	625	182	247	0	485	0	359	67	0	0	0	47	161	82	128	0	160	0	0	18	22	130	0	0	0	0	0	25	0	68	0	0	0	0	0	0	0	70	54
4ff80b81d406b5cb83510fd258197bc8	bASV682	d__Bacteria; p__Acidobacteriota; c__Subgroup_5; o__Subgroup_5; f__Subgroup_5; g__Subgroup_5; s__uncultured_bacterium	GTAGTCCTAGCCCTAAACGATGGATACTTGCTGTGACTGGGATTGAATCCAGTCGTGGCGAAGCTAACGCATTAAGTATCCCGCCTGGGGAGTACGGTCGCAAGGCTGAAACTCAAAGGAATTGACGGGGGCCCGCACAAGCGGTGGAGTATGTGGTTTAATTCGACGCAACGCGAAGAACCTTACCTGGGCTCGAACGGCTAGTGACAGGTGGCGAAAGTCGCTTTTCCCGCAAGGGACACTAGTCGAGGTGCTGCATGGCTGTCGTCAGCTCGTGTCGTGAGATGTTGGGTTAAGTCCCGCAAC	0	0	0	351	0	523	141	308	165	161	0	0	900	0	0	0	0	244	143	126	186	433	78	99	162	0	0	0	139	0	0	35	0	0	0	0	0	0	0	0	0	0	0	63	0	89
205d828d280edd5e8c1cd86efe595cf7	bASV683	d__Bacteria; p__Actinobacteriota; c__Thermoleophilia; o__Solirubrobacterales; f__67-14; g__67-14	GTAGTCCACGCCGTAAACGATGGGCACTAGGTGTGGGAGGTGTCGACTCCTCCCGTGCCGGAGCTAACGCATTAAGTGCCCCGCCTGGGGAGTACGGCCGCAAGGCTAAAACTCAAAGGAATTGACGGGGACCCGCACAAGCAGCGGAGCATGTGGTTTAATTCGACGCAACGCGAAGAACCTTACCTGGGTTTGACATGTTCCTGACCGCCCTGGAAACAGGGCTTCCCTTCGGGGCAGGATCACAGGTGGTGCATGGCTGTCGTCAGCTCGTGTCGTGAGATGTTGGGTTAAGTCCCGCAACGA	91	0	97	734	0	180	0	1246	421	267	296	0	66	0	361	0	0	1205	0	263	171	245	0	0	188	0	85	0	488	0	0	0	316	339	76	0	0	0	176	256	450	492	315	577	453	134
d4fe949d53433fc75472089c840180a8	bASV684	d__Bacteria; p__Proteobacteria; c__Alphaproteobacteria; o__Sphingomonadales; f__Sphingomonadaceae; g__Sphingomonas	GTAGTCCACGCCGTAAACGATGATAACTAGCTGTCCGGGCACTTGGTGCTTGGGTGGCGCAGCTAACGCATTAAGTTATCCGCCTGGGGAGTACGGTCGCAAGATTAAAACTCAAAGGAATTGACGGGGGCCTGCACAAGCGGTGGAGCATGTGGTTTAATTCGAAGCAACGCGCAGAACCTTACCAGCGTTTGACATGTCCGGACGATTTCCAGAGATGGATCTCTTCCCTTCGGGGACTGGAACACAGGTGCTGCATGGCTGTCGTCAGCTCGTGTCGTGAGATGTTGGGTTAAGTCCCGCAAC	0	0	0	0	0	0	0	83	0	0	0	0	0	0	127	0	0	0	0	0	0	0	0	52	0	0	208	0	0	0	0	0	0	0	332	0	0	0	0	0	0	0	26	0	101	0
522b7b48175835a7dd19f2294e00b7ab	bASV685	d__Bacteria; p__Chloroflexi; c__AD3; o__AD3; f__AD3; g__AD3; s__uncultured_bacterium	GTAGTCCACGCCCTAAACGTTGCGAACTAGGTGTTGGTCGGATTGACCCGATCAGTGCCGCAGCTAACGCATTAAGTTCGCCGCCTGGGGACTACGGCCGCAAGGTTAAAACTCAAAGGAATAGGCGGGGGCCCGCACAAGCAGCGGAGCGTGTGGTTTAATTCGAGGCGACGCGAAGAACCTTACCTGGGCTTGACATGCACAGGAAACGCCGGTGAAAGCCGGCGCCCCTCGCAAGAGGTCTGTGCACAGGTGGTGCATGGCTGTCGTCAGCTCGTGCCGTGAGGTGTTGGGTTAAGTCCCGCA	0	0	0	0	302	0	0	0	0	0	0	0	40	0	0	0	0	52	0	0	0	0	62	57	0	0	0	0	0	0	33	0	0	0	0	0	42	31	0	0	0	0	0	0	0	0
043ea3422f209202635591fcb60a77df	bASV686	d__Bacteria; p__Actinobacteriota; c__Thermoleophilia; o__Gaiellales; f__uncultured; g__uncultured	GTAGTCCACGCCGTAAACGATGGGTGCTAGGTGTGGGGGGTGTCGACTCCCTCCGTGCCGAAGCTAACGCATTAAGCACCCCGCCTGGGGAGTACGGCCGCAAGGCTAAAACTCAAAGGAATTGACGGGGGCCCGCACAAGCAGCGGAGCATGTGGTTTAATTCGACGCGACGCGAAGAACCTTACCAAGGCTTGACATGCACGGGAATGTCGGAGAAATTCGGCAGCCCTTCGGGGCTCGTGCACAGGTGGTGCATGGCTGTCGTCAGCTCGTGTCGTGAGATGTTGGGTTAAGTCCCGCAACGA	0	0	0	229	0	88	292	359	92	0	166	0	54	0	0	0	0	81	288	275	107	260	106	134	105	0	0	0	0	0	58	0	0	0	0	0	0	0	0	0	0	0	0	0	0	46
f12c2066d9dd4f4854cdd75fa06bf7fe	bASV687	d__Bacteria; p__Proteobacteria; c__Alphaproteobacteria; o__Rhizobiales; f__Hyphomicrobiaceae; g__Pedomicrobium	GTAGTCCACGCCGTAAACGATGGATGCTAGCCGTCAGCAAGCATGCTTGTTGGTGGCGCAGCTAACGCATTAAGCATCCCGCCTGGGGAGTACGGCCGCAAGGTTAAAACTCAAAGGAATTGACGGGGGCCCGCACAAGCGGTGGAGCATGTGGTTTAATTCGACGCAACGCGAAGAACCTTACCAACCCTTGACATGTCCGGTCGGTTTCCAGAGATGGATTCCTCCCAGCAATGGGCCGGAACACAGGTGCTGCATGGCTGTCGTCAGCTCGTGTCGTGAGATGTTGGGTTAAGTCCCGCAACG	209	0	223	203	0	144	0	272	160	198	345	164	75	162	0	0	0	172	0	80	155	152	49	0	242	0	0	0	214	757	309	478	139	0	0	0	0	0	374	576	445	121	260	410	406	422
55b46ab841d6698381b0661355f0767f	bASV688	d__Bacteria; p__Proteobacteria; c__Alphaproteobacteria; o__Rhizobiales; f__Rhizobiales_Incertae_Sedis; g__uncultured; s__uncultured_bacterium	GTAGTCCACGCCGTAAACTATGGATGCTAGCCGTCAGGAAGCTTGCTTCTTGGTGGCGCAGCTAACGCATTAAGCATCCCGCCTGGGGAGTACGGTCGCAAGATTAAAACTCAAAGGAATTGACGGGGGCCCGCACAAGCGGTGGAGCATGTGGTTTAATTCGAAGCAACGCGCAGAACCTTACCTACCCTTGACATGTCCAGTATGAGCATCAGAGATGGAGCTCTTCAGTTCGGCTGGCTGGAACACAGGTGCTGCATGGCTGTCGTCAGCTCGTGTCGTGAGATGTTGGGTTAAGTCCCGCAA	0	0	0	109	585	1111	33	112	65	54	0	0	2716	165	0	0	322	501	45	49	67	94	1039	22	81	0	81	70	87	0	0	0	119	0	0	420	31	0	0	0	0	0	0	0	0	0
13de67887252b4bf2ba9c78cda192dfa	bASV689	d__Bacteria; p__Proteobacteria; c__Alphaproteobacteria; o__Rhizobiales; f__Xanthobacteraceae; g__uncultured	GTAGTCCACGCCGTAAACGATGGATGCTAGCCGTTGGCGGGTTTACCTGTCAGTGGCGCAGCTAACGCAATAAGCATCCCGCCTGGGGAGTACGGTCGCAAGATTAAAACTCAAAGGAATTGACGGGGGCCCGCACAAGCGGTGGAGCATGTGGTTCAATTCGAAGCAACGCGAAGAACCTTACCAGCCCTTGACATCCCGGTCGCGGGAACGAGAGATCGATCCCTTCAGTTCGGCTGGACCGGAGACAGGTGCTGCATGGCTGTCGTCAGCTCGTGTCGTGAGATGTTGGGTTAAGTCCCGCAA	0	0	0	0	0	0	0	0	0	0	0	0	0	0	0	0	0	0	0	0	0	0	0	24	0	0	0	0	0	0	0	0	0	0	0	0	0	0	0	0	0	0	0	0	0	0
[truncated: 1,875 more rows]
[truncated: 1,496 more columns]

## Sheet: Table S2B
FeatureID	ASVID	Taxonomy	Fasta	CA_RS01	CA_RS02	CA_RS03	CA_RS04	CA_RS05	CA_RS06	CA_RS07	CA_RS08	CA_RS09	CA_RS10	CA_RS11	CA_RS12	CB_RS01	CB_RS02	CB_RS03	CB_RS04	CB_RS05	CB_RS06	CB_RS07	CB_RS08	CB_RS09	CB_RS10	CB_RS11	CB_RS12	CB_RS13	CB_RS14	CB_RS15	CB_RS16	CB_RS17	CB_RS18	CB_RS19	CB_RS20	CB_RS21	CB_RS22	CB_RS23	CB_RS24	CC_RS01	CC_RS02	CC_RS03	CC_RS04	CC_RS05	CC_RS06	CC_RS07	CC_RS08	CC_RS09	CC_RS10
[truncated: 1,085 more rows]
[truncated: 1,500 more columns]

[truncated: 1 more sheets: Table S2C]
